# Supplementary material for: Transcriptome and Metabolome Analysis of Isoquinoline Alkaloid Biosynthesis of Coptis chinensis in Different Years
Source: MDPI journal article supplement (doi:10.3390/genes14122232), 2023-12-18
Supplement: s1 [file s1]

## OMT

### >St6OMT1

MAAENQKQHQAQAQAKLWSFIYGYSESLVLKSAVQLDIPLIIHNHGKPISSLACQIPSPSG  
AVDHDRLYRIMRYLVHMKLFTKESVEGEDRYGLAPPAKYLVKGWEKSMVPSILCVTDKE  
FMSPWYHLKEALSNDSTTAFEKALGMNIWDYMSKNPKKNIFNEAMACETSQIMSALVSE  
CKDMFEGIKSLVDVGGNGTAVRHIAKAFPHIICTVYDLPVHAADSPTYPEVSRVEGDMFK  
FIPKADAILMKCILHDWADEECIKILKRCKEALPSNGGKIILVEVVLNVFSEHPYTKIRMLS  
DLDMMLNCGGKERTEEEWKLIYAAGFSRHNIRQVDFTQSVIEVYP

### >St6OMT2

MEEEMKAQAQVWRYVYGFAESLTLKCAIQLNIPDILHHHNRPMTLSELATHLPLPSVNQD  
RLRYVMRYLVHMGFLDLDSPDSPKYSLSASKLLVKGQDKSLASFALLQYYEMDAWHH  
LSAAVEGAATPWEKCHGVYREYFAKDAVANQLLSDAMTSHTSMVTEALVEGCKKGGV  
LHGVRSFVDVGGSTGVAARAVAKAFPGIKCSVFDLPHVIATAPECPEVTRIQQDMFVSIPET  
DVVFMKSVLHDWGEDCVKILKKCKEAIAGKEGGKVVLIDIVLDAESSYEFKGARLGME  
MDMLVTVGGKERSEAEWQKLFKDAGYSRYKITPIVAIESVIEVFP

### >St6OMT3

MEDIGKKRETAISENDYDDEEQRAEIDMWRYIFGFSEMAAVKCAIELGIAEAMEAHGRPM  
SLSELATALKCSSSYLRILRFLVHLRIFKEKCSNAANGTKLYTSLPLGRLLMKQGEHGMA  
ALVLLESSPVMLAPWHALSGRVRNNERPAFEAAHGEDVWAFAGNPNHSMLINEAMAC  
DARMVVAIVNGCADVFDGVDSVVDVGGGDGTTLGMLVKAFPWIKGINFDLPHVLSVAP  
GRNGVEHLGGDMFKAVPQADAAFLMWVLHDWCDEECIEILKRCREAIKPERGKVIIVDA  
VIEEADDEQEKEH  
GDENYKLGAKLMLDMVMMMAHTNRGKERTQEEWQYVLDKAGFSRFVVRPIRAVQSVI  
VAYC

### >St6OMT4

MSTIAGEEQEQEMRWQAQVWNHISGGFVNSIVLKCAADLSLFDTIQAIHTKQGKPVTPST  
LVRTSSLSSINPHKLFRLRLFLAHMKLLTIHAFDDVDGDDGGNEVGFSLTDLAKLMLRRNEKN  
LVDWVIGVPDEPAINAWHQLGNCVSYPSGPTAFEEEHGKTLWEFARDNPEMNKVFNDA  
MACDTRLVMPAFIEGCKDVLKGISSLVDVGGGTGTAMSYVIKAFPHVKCTVYDLPHVITT  
SPEYPGIELIGDMFQSVPPQADAVLLKFMLHNWQNEECVKILKKCKEAVPKEKGKVIIVD  
VVIDQDEEDYDVTHIRLSLDMMDMMMSGGRERTKEEWRVLMKMAGFSHYEIPIFAVQS  
VIVAYP

### >AthOMT

MGSTAETQLTPVQVTDDEAALFAMQLASASVLPMAKLSALELDLLEIMAKNGSPMSPTI  
ASKLPTKNPEAPVMLDRILRLTSYSVLTCNRKLSGDGVERIYGLGPVCKYLTKNEDGVS  
IAALCLMNQDKVLMESWYHLKDAILDGGIPFNKAYGMSAFEYHGTDPRFNKVFNNGMS  
NHSTITMKKILETYKGFEGTSLVDVGGGIGATLKMIVSKYPNLKGINFNLPHVIEDAPSH  
GIEHVGGDMFVSVPKGDAIFMKWICHDSDEHCVKFLKNCYESLPEDGKVILAECILPET  
PDSSLSTKQVVHVDCIMLAHNPGGKERTEKEFEALAKASGFKGIKVVC  
AFGVNLIELKKL

### >CanODOMT

MDSTNQNLQTEDAEFLFAMQLASASVLPMLVLSALELDLLEIMAKAGPGAISPSELAA  
QLPTKNPEAPVMLDRMLRLLATYSVLNCTLRPLDPGRVERLYSLAPVCKLLTKNADGVSV  
APLLLMNQDKVLMESWYHLTDAVLDDGGVPFNKAYGMTAFEYHGTDPRFNKVFNNGMS

DHSTMTMKKILEDYKGFEGLSIVDVGGGTGATVNMIVSKYPSIKGINFDLSHVIEDAPAY  
PGVEHVGRDMFVSVPKADAIFMKWICHWDSEHCLKFLKNCYEALPANGKVLVAECILP  
ETPDTSAATKNAVHVDIVMLAHNPPGGKERTEKEFEALAKGAGFTGFRRACCAYQTVWME  
FHK

>CamCaOMT

MLFAMQLACASVLPMLKSAIELDLLEIIRGQDTCMSPTEIASHLPTTNPDPAMVDRILR  
LLSCYSVVTCSVRSVDDQRVYGLAPVCKYLTKNQDGVSAALCLMNQDKVLMESWYHL  
KDAVLDDGGIPFNKAYGMSSFEYHGTDPFRNKVFNRGMSDHSTITMKKVFTYQGFQGLT  
SLVDVGGGTGATLTMLSKYPTIRCINFDLPHVIEDAPEYPGIEHVGGDMFVSVPKGDAIFM  
KWICHWDSEHCLKLLKNCYDALPNNGKVILAECILPEVPDSSLATKGVVHIDVITVAHN  
PPGGKERTEKEFEALAKAAGFQGFQVFCNAFNTYIIIEFSKKICN

>Cam3'FOMT

MLFAMQLASASVLPMLKSAIELDLLEIIASQDTCMSPTEIASHLPTTNPHAPT MIDRILRL  
LSSYSIVT

CSVRSVDDQRVYSPAPVCKYLTKNQDGVSAALCVAAQDKVLMECWYHMKDAVLDDGGI  
PFNKAYGMPIDYFAKDLGSNKVFNRGMSDFSSMIKKILETYKGFQGLTSLVDVGGGTG  
ATLT KILSKYPTIRGINFDLPHVIQDAPEYPGIEHVGGDMFVSVPKGDAIFMKWICHWDNE  
EQCLKLLKNCYDALPNNGKVIVAEYILPVVPDSSLASKLSVTADVMIVTQNSGGKERTEK  
EFEALAKAAGFQGFQVFCNAFTIYIIIEFSKNISN

>CbrCaOMT

MGSTGNAETQLTPTHVSDEEANLFAMQLASASVLPMLKAAIELDVLEIMAKSIPHGSGA  
YISPAEIAAQLPTTNPDPVMLDRVLRLLASYSVVTCSLRELPDGKVERLYGLAPVCKFLT  
KNEDGVSLAPLCLMNQDKVLMESWYYLKDAILDGGIPFNKAYGMTAFEYHGTDPFRNK  
VFNRGMSDHSTITMKKIFEMYTGFEALNTIVDVGGGTGAVLSMIVAKYPSIKGINFDLPHV  
IEDAPIYPGVEHVGGDMFVSVPKGDAIFMKWICHWDSEHCLKFLKNCYAALPEHGKVI  
VAECILPLSPDPSLATKGVIHIDAIMLAHNPPGGKERTEKEFEALAIGAGFGFKVACCAFNT  
YVMEFLKTA

>CbrIeOMT

MGSTGNAEIQIIPTHSSDEEANLFAMQLASAAVLPMLKAAIELDVLEIMAKSVPPSGYISP  
AEIAAQLP

TTNPEAPVMLDRVLRLLASYSVVITYTLRELPSGKVERLYGLAPVCKFLT KNEDGVSLAPF  
LLTATDKVLL

EPWFYLKDAILEGGIPFNKAYGMNEFDYHGTDRFNKVFNRGMSNSTITMKKILEMYN  
GFEGLT TIVDVGGGTGAVASMIVAKYPSINAINFDLPHVIQDAPAFSGVEHLGGDMFDGVP  
KGDAIFIKWICHWDSEHCLKLLKNCYAALPDHGKVIVAEYILPPSPDPSIATKVVIHTDAL  
MLAYNPPGGKERTEKEFQALAMASGFRGFKVASCAFNTYVMEFLKT

>Cch6OMT2

MVKKDNLSSQAKLWNFIYGFAESVLKCAVQLDLANIIHNNGTSMTLSELSSRLPSQPVNE  
DALYRVMRYLVHMKLFTKASIDGELRYGLAPPAKFLVKGWDKCMVGSILAITDKDFMAP  
WHYLDGLAGESGTAFEKALGMNIWGYMAEHPEKNQLFNEAMANDSRLIMSALVKECG  
NIFNGITTLDVVG GTGTAVRNIANAFPHIKCTVYDLPHVIADSPGYSEVHCVAGDMFKFIP  
KADAIMMKCILHDWDDKECIEILKRCKEAVPIEGGKVIIVDIVLNVQSEHPYTKMRLTDL  
DMMLNTGGKERTEEEWKNLIHDAGYKGHKITQITAVQSVIEAIPPY

>Cja6OMT

MEVKKDNLSSQAKLWNFIYGFAESLVLKCAVQLDLANIIHNSGTSMTLSELSSRLPSQPVN  
EDALYRVMRYLVHMKLFTKASIDGELRYGLAPPAKYLVKGWDKCMVGSILAITDKDFMA  
PWHYLKDGLSGESGTAFEKALGTNIWGYMAEHPEKNQLFNEAMANDSRLIMSALVKEC  
GNIFNGITTLDVVGGGTGTAVRNIANAFPHIKCTVYDLPHVIADSPGYSEVHCVAGDMFKF  
IPKADAIMMKCILHDWDDKECIEILKRCKEAVPVKGGKVIIVDIVLNVQSEHPYTKMRLTL  
LDDMMLNTGGKERTEEEWKLIHDAGYKGHKITQITAVQSVIEAYPY

>Cja4'OMT

MAFHGKDDVLDIKAQAHVWKIYGFADSLVLRCAVELGIVDIIDNNNQPMALADLASKLP  
VSDVNCDNLYRILRYLVKMEILRVEKSDDGQKKYALEPIATLLSRNAKRSMVPMILGMTQ  
KDFMTPWHSMKDGLSDNGTAFEKAMGMTIWEYLEGHPDQSQLFNEGMAGETRLLTSSLI  
SGSRDMFQGIDSLVDVGGNGTTVKAISDAFPHIKCTLFDLPHVIANSYDLPNIERIGGDM  
FKSVPSAQAIHLKLILHDWNEDSIKILKQCRNAVPKDGGKVIIVDVALDEESDHLSSTRLI  
LDIDMLVNTGGKERTKEVWEKIVKSAGFSGCKIRHIAAIQSVIEVFP

>CjaCoOMT

MDTPNTFQNDDEIKAQAQVWKHMFGFAETIMLRSTVSLGIPDIIHNNGPVTLSQLVTHLPL  
KSTSIDRFHHFMRYLVHMQFLTISTDQITKEDKYELTPASKLLVHGHQKSLAPYVMLQTHP  
EEFSVWSHVINVLDGKKPYWESNDTSMYEKTEGDPEINEILNDAMTSHSTFMLPALVSGL  
MKENVLDGVASIVDVGGNSGVVAKGIVDAFPHVKCSVMDLNHVIERVIKNPKLDYVAGD  
MFTSIPNADAILLKSTLHNYEDDDCIKILNIAKEALPST  
GGKVILVEIVVDTENLPLFTSARLSMGMDMMLMSGKERTKKEWEDLLRKANFTSHQVIPI  
MAIESIIVAYS

>CjaSOMT

MCTSLSELKCPVFSTKRKLLLEFALRTSVDMAAQEGVNYLSGLGLSRLICLPMALRAAIEL  
NVFEIISQA  
GPDAQLSPSDIVAKIPTKNPSAAISLDRILRMLGASSILSVSTTKSGRVYGLNEESRCLVASE  
DKVSVVP  
MLLFTSDKAVVESFYNIKDVVLEEGVIPFDRTHGMDFQYAGKEERVNKSFNQAMGAGST  
IAFDEVFKVYKGFNDLKVLDVGGGIGTSLSNIVAKHPHIRGINFELPHVIGDAPDYPGVEH  
VPGDMFEGVPNAQNILLKWVLHDWDDRSIKILKNCWKALPENGTVIVIEFVLPQVLGN  
NAESFNALTPDLLMMALNPGGKERTTIEFDGLAKAAGFAETKFFPISQGLHVMEFHKINC

>Cmi6OMT

MEVQKGDQAAQAKIWRLIYGFSESLVLRCAVELGIADIIHEHGDITISINQLASKIPVNSVNV  
DHLYRIMRFLVHMKLFSIQSVKGELRYGLEPAARCLVKGWDKCMVPSILSITDKDFMAPW  
HYIKESLGKDSPTAFERALGMNIWDYMADNPKNQLFNEGMACDSRLLTSALIQDCKEM  
FEGILSLVDVGGGTGTALRAIAKAFPHLKCTVYDLPHVIADSPDYPEVARVPGDMFKSIPS  
ADAIMMKCILHDWDDQECIKILKKCREAVPPKGGKVIIVDIVLDVESDCHYSNMRRRCMDL  
DMMLNTGGKERTEEEWKLIYDAGFTGYKIKSISAVQSVIEAYPY

>CroCaOMT

MGSANPDNKNNSMTKEEEEACLSAMRLASASVLPMLVLSAIELDLLELIKSGPGAYVSPS  
ELAAQLPTQNPDPVMLDRILRLLASYSVLNCTLKDLPDGGIERLYSLAPVCKFLTKNEDG  
VSMAALLLMNQDKVLMESWYHLKDAVLEGGIPFNKAYGMTAFEYHGKDPRFNKVFNQ  
GMSNHSTIIMKKILEIYQGFQGLKTVVDVGGGTGATLNMIVSKYPSIKGINFDLPHVIEDAP  
SYPGVDHVGGDMFVSVPKGDAIFMKWICHWDSDAHCLKFLKNCHEALPENGKVILAEC  
LLPEAPDSTLSTQNTVHVDVIMLAHNPGGKERTKEFEALAKGAGFRGFIKVCCAYNSWI

MELLK

>Eca4'OMT

MGLEFNEEVDIKAQAHLWNIIYGFADSLVLRSAVELGIADIIKNNNGSITVSELASKLPISNV  
NSDNLYR

VLRYLVHMGILKETKSTINGGEIKKLYSLEPVGSLLVKDAERNMVPIVLGMTQQDFMIPW  
HYIKEGLGEGSTAFEKGMGMTLWEYLEGHPEQGHLEFNVGMEGETRLLTKTLIESCKDTFE  
GLSSLVDVGGGNGTTIKAISEAFPHIKCSLYDLPHVVADSHDLPNIEKIPGDIFKFIPNAQAIL  
LKLILHDWSEDESVKILKKCREAVPQDTGRVIVDVALEEESEHPLTKTRLVLDVDMLVNT  
GGRERSEDDWAKLLKLAGFRTHKIRHIAAVQSVIEAFP

>Eca7OMT

MDEEILGQADICKYMYGFVDSMTLRCVVELGIPDIIHSHGRPITLTEILNGIPNLSSSFDINY  
LQGIMT

ILVRRRVFAVHKFDPKDGNTLTEIRYGLTPSSKCLLKDSKFNLA PFV LLETHPWITDPWNYL  
GKCVQEGSGFVKAHGSDFVKFGSDHPEFFKLFYDGMECSTKVLVQVVLDKYQQVF KD  
VKSIVDVGGGTGMMISEIVKNHPHIKGINFDLPHVVAEAPDYPGVEHVGGDMFVEIPQAD  
AITMKGILHDWNDDACVKILENCKKAIPKNGKVIIDCVLNPDGDDLFD DIKVVSDLGMR  
VHCSDGKERTEAEWEKLLKKGFP RYKITHVVTVQSMIEAYPE

>EcaOMT

MEMEGADKIDQATQAKIWKHIYGFAESLILKSAVELEIADTIH NHGKPM T LSELASKLPVQ  
PVDLDRLYRVMRYLVHMKLFKKQEDEDEESIKYSLLPPAKFLIKGWEKSMVSAILLNDK  
DFMSPWHHLKEGLVNNSNAFDKALGKSIWDYMSANPDKNKVFNEGMACDSRLVSSALV  
NECGNIFQGIQTLVDVGGGTGTAVKAVSKAFPHIKCSIYDLPHVISDSPDIPNIVKIEGEMFK  
SIPSADAILMKCILHDWNDDCEIEILKKCKEAVPKEGGKVIIVDIVLDMESKHYPYSKVRLTL  
DLDMMLNTEGKERTEEEWKKLIDGAGFASYKITQISALQSVIEAFPY

>EglCaOMT

ANLFAMQLASASVLPMLVKA AIELDLLEIMAKAGPGAFLSPGEVAAQLPTQNPEAPVMLD  
RISRL LASYSVL TCTLRNLPDGKVERLYGLAPVCKFLVK NEDGV SIAALNLMNQDKILMES  
WYYLKDAVLEGGIPFNKAYGMTAFEYHGTDPRFNKIFNRGMSDHSITMKKILETYKGFE  
GLETVV DVGGGTGAVLSMIVAKYPSMKGINFDLPHVIEDAPPLPGVKHVGGDMFVSVPK  
GDAIFMKWICHDWSDDHCAKFLKNCYDALPNNGKVIVAECVLPVYPDTSLATKNVIHIDC  
IMLAHNPGGKER

>EguOMT

MGSTGSETQMTPTQVSDEEANLFAMQLASASVLPMLVKA AIELDLLEIMAKAGPGAFLSP  
GEVAAQLPTQNPEAPVMLDRIFRLLASYSVL TCTLRNLPDGKVERLYGLAPVCKFLVKNE  
DGV SIAALNLMNQDKILMESWYYLKDAVLEGGIPFNKAYGMTAFEYHGTDPRFNKIFNR  
GMSDHSITMKKILETYKGFE GLETVV DVGGGTGAVLSMIVAKYPSMKGINFDLPHVIED  
APPLPGVKHVGGDMFVSVPKGDAIFMKWICHDWSDDHCAKFLKNCYDALPNIGKVIVAE  
CVLPVYPDTSLATKNVIHIDCIMLAHNPGGKERTQKEFETLAKGAGFQGFQVMCCAFGTH  
VMEFLKTA

>GecOMT

MSDSYSTKDN NLFSTSSEQTEDGACLSAMRLVTNLVYPAVLNAAIDLNLFEIIAKATPPGAF  
MSASEIASKLPLPTQHSDLPNRLDRMLRLLASYSVLTCATRSTERYGLSQVGKYLVPDGS  
RGYLASF TFLCYPALMN VWLNFKEAVVDEIDLFKKLHGVSKYEYMETDPKMNHIFNK  
SMADVCATEMKRILQIYKGFEGISTLVDVGGGNGQNLKMIISKYPLIKGINFDLPQVIENAP

PIPGIELVGGDMFASVPQGDAMILKAVCHNWSDEKCLEFLSNCHKALSPNGKVIVVEFILP  
EEPEPTEESQLASTLDNMFITVGGRERTQKQYENMCKLAGFSKFQVACRAFSSLGVMEFY  
K

>HvuOMT

MDKISAPFFSGTSPAAASVAGVDEDDRCLCFQAQELMFAYNISMVLRAAIQLGLLDALSAA  
GGKALTPNELVENVETSSNKAEEAAAVDRLRYLSCFNVVTCSSAAAGPDGTLVRRYTTGP  
LCRWLTCKDRGDGTLSPFAVFVVDPDHLFPWHHIAEAVTAGGPSAFERTQKWPYYEYMGK  
NQRLGTLFDNAMAQHSVILVTKMLERFKGFDGVQRLVDVGGGTGSTLGMITSKYKGMT  
GINYDLPHVIAQGLPLPGVEHVAGDMYESIPTGDAVLLQWITLMLNDDEFVKILSNCHNA  
LPKDGKVIVVDGILPENPDSSLTARDAFTLDIIMFVLFKGAKQRTEKEFARLAKQAGFTGGI  
KKTYIFFNFYALEFTK

>HvuF7OMT

MQDTSSTQHKSLPNNIEMDMVTSMPLEANSNGQILQAEAEFCHSFGYLKSMALQSVVK  
LRIPDVLHRYGGAASLPPELLSTVPIHPNKLPLYLPRLMKMLAAAGIFTAEDVPATVGDGEPT  
TLYHLNAVSRLLVDDASVNGGASMSPCVLLGTVPLFLGASLKLHEWLQSEEQATTETPFM  
LAHGGTLYGIGGRDSEFNTVFNKAMGASSEFVAALAVRECRDVFAGIKSLVDVAGGNGTT  
ARTIAEAFPYVKCSVLDLPQVIQGISSHGTVEFVAGDMMEFVPPAEAVLLKYVLHNWSDQ  
DCVKILTRCREAISHGEKAGKVIIDTVVGSPSQQILESQVTMDLSMMMLFNGKVREEQN  
WHKIFLEAGFSHYKIHNVLGMRSLIEVQP

>Msa7OMT

MASSINGRKPSEIFKAQALLYKHIYAFIDSMCLKWAVGMNIPNIIHNHGKPISSLNLVSILQV  
PSSKIGN  
VRRMLRYLAHNGFFEIITKEEESYALTVASELLVRGSDLCLAPMVECVLDPTLSGSYHELK  
KWIYEEDLT  
LFGVTLGSGFWDFLDKNPEYNTSFNDAMASDSKLINLALRDCDFVFDGLESIVDVGGGTG  
TTAKIICETFPKLCIVFDRPQVVENLSGSNNLTYVGGDMFTSIPNADAVLLKYILHNWTD  
KDCLRLKKCKEAVTNDGKRGVTHIDMVINEKKDENQVTQIKLLMDVNMACLNGKERN  
EEEWKKLFIEAGFQHYKISPLTGFLSLIEIYP

>MsaCa3OMT

MGSTGETQITPTTHISDEEANLFAMQLASASVLPMLKSALELDLLEIIAKAGPGAQISPIEIAS  
QLPTTN  
PDAPVMLDRMLRLLACYIILTCVVRTQQDGKVQRLYGLATVAKYLVKNEDGVSISALNLM  
NQDKVLMESWYHLKDAVLDGGIPFNKAYGMTAFEYHGTDPFRNKVFNGMSDHSITIM  
KKILETYTGFEGLKSLVDVGGGTGAVINTIVSKYPTIKGINFDLPHVIEDAPSPGVEHVGG  
DMFVSIPKADAVFMKWICHOWSDEHCLKFLKNCYEALPDNGKVIVAECILPVAPDSSLAT  
KGVVHIDVIMLAHNPGGKERTQKEFEDLAKGAGFQGFKVHCNAFNTYIMEFLKKV

>MsaII2'OMT

MGNSYITKEDNQISATSEQTEDSACLSAMVLTTLNLYPAVLNAAIDLNLFEIIAKATPPGAF  
MSPSEIAS  
KLPASTQHSDLPNRLDRMLRLLASYSVLTSTTRTIEDGGAERVYGLSMVGKYLVPDES  
RGYLAFTTFLCYPALLQVWMNFKEAVVDEDIDLKFNHGVTKYEFMGKDKKMNQIFNKS  
MVDVCATEMKRMLIYTGFEGLSTLVDVGGGSGRNLELIISKYPLIKGINFDLPQVIENAPP  
LSGIEHVGGDMFASVPQGDAMILKAVCHNWSDEKCLEFLSNCHKALSPNGKVIIIVEFILPE  
EPNTSEESKLVLSTLDNLMFITVGGRETEREKQYEKLSKLSGFSKFQVACRAFNSLGVMEFYK

>CNtaCaOMT

MESSTKSQIPTQSEEEERNCTYAMQLSSSVLPFVLHSTIQLEVFEILAKSNDTKLSASQIVSQ  
IPNCKNP

DAATMLDRMLYVLASYSLFTCSIVEDEENNGGQKRVYGLSQVGKFFVRDEDGASMGPLL  
ALLQDKVFINSWFELKDAVLEGGVPFDRVHGCVHAFEYPKSDPKFNDVFNKAMINHTTV  
VMKKILENYKGFENLKTLDVGGGLGVNLKMITSKYPTIKGTNFDLPHVVQHAPSYPGV  
EHVGGDMFESVPEGDAIFMKWILHDWSDSHNLKLLKNCYKALPDNGKVIVVEAILPVKP  
DIDTAVVGVSQCDLIMMAQNPGGKERSEEEFRALATEAGFKGVNLICCVCNFWVMEFCK

>NtaCCoA3OMT5

MAENGIKHQEVGHKSLLQSDALYQYILETSVYPREPESMKELREVTAKHPWNLMTTSAD  
EGQFLNMLLKLINAKNTMEIGVYTGYSLLATALAIPDDGKILAMDINRENYEIGLPIIEKAG  
VAHKIEFREGPALPVLQDQVEDKKNHGTYDFIFVDADKDNYINYHKRIIDLKVGGLIGYD  
NTLWNGSVVAPPDAPMRKYVRYRDFVLELNKALAVDPRIEICMLPVGDGITLCRRIT

>ObaCaOMT

MGSATNTPQINSDEEENFLFAMQLASASVLPMLKSAIELDLLELIKSGAGAFVSPVDLA  
AQLPTTNPDAAHVMLDRILRLTSYAILECRLKTLPDGGVERLYGLAPVCKFLTKNEDGVS  
MAPLTLMNQDKVLMESWYHLSDAVVDGGIPFNKAYGMTAFEYHGTDPFRNKVFNQGMS  
NHSTITMKKILETYTGFDGLKTVVDVGGGTGATLNMIVSKYPSIKGINFDLPHVIEDAPSY  
PGVEHVGGDMFVSVPKGDAIFMKWICHWDSEHCVKFLKNCYDALPQNGKVILAECVL  
PEAPDTGLATKNVVHIDVIMLAHNPPGGKERTEKEFQGLAKAAGFKQFNKACCAYNTWIM  
ELLK

>ObaChOMT

MALQNMDISLSTEQLLQAQAHVWNHMYAFANSMSLKCAIQLGIPDILHKHDHPMTLSQL  
LKAIPINKEKSQSFQRLMRALVNSNFFIEENSNNQEV CYWLTPASRLLLKGAPLTVAPLVQV  
VLDPTFTNPWHYMSEWFKHENHATQFEAANGCTFWEKLANKPSMGRFFDEAMSCDSRL  
VAHVLT KDYKHVIDGIRTLVDVGGGNGTMAKAIVEAVPTMKCTVLDLPHVVAGLESTDK  
LSYIGGDMFQSIPSADAILLKFIHDWDDEGLKILKRCKDAVGIGGKVIIDVVVGVNHDV  
DEVLEDQLHFDMMAMMSYFNAKERTMNEWKELISAAGFTSYKLTPAFGVRSLIEAYP

>ObaEuOMT

MALQKVDISLSTEQLLQAQVHVWNHMYAFANSMSLKCAIQLGIPDILHKHGRPMTLSQL  
LQSIPINKEKTQCFQRLMRALVNSNFFIEENNSNNQEV CYWLTPASCLLLKEAPLTVTPLVQ  
VVLDPTFTNPWHHMSEWFTHEKHATQFEAANGCTFWEKLANEPSKGRFFDEAMSCDSR  
LIAHVFTKDYKHVIEGIRTLVDVGGGNGTMAKAIVEAMPTIKCTVIDLPHVVAGLESTDNL  
NYIGGDMFQSIPSADAILLKSIHDWDDVEGLKILKKCKDAVVMGGKVIIDVVVGVNHDI  
DEVLEDQLHFDMMAMMCYFNAKERTMSEWEKLIYDAGFKSYKLTPAFGVRSLIEAYP

>Pso4'OMT1

MGSSIDAETHEVDIKDQAQLWNIYGYADSLVLRCTVEIGIADIHKNNNGSITLSELVSKLPL  
SNVNSDN  
LYRLLRYLVHLNILGQQTCAAGVDRVYSLKPVGTLLLKDSERSMAPVILGLSQKDFLFVW  
NFVKEGLGTGSTTAFEKAMGMDMWKYLEVNPNQSQLFDEGQAGETRLLTKTLLVDCRD  
TFQGMDSLVDVGGGNGTTIKAIHEAFPHIKCTLYDLPHVIANSDDHPNILKVP GDMFMSVP  
SAQVLLLKCVLHDWTDEHCVNLLKCKEAI PKETGKVIIVDVALEEESEHELT KARLILDID  
MLVNTGGRERTAEDWENLLKRAGFRSHKIRPIRAIQSVI  
EAFP

>Pso4'OMT2

MGSLDAKPAAATQEVS IKDQAQLWNIYGFADSLVLRCAVEIGIADI IKNNDGAILAQLAA  
KLPITNVSSDYLYRMVRYLVHLNII EQETCNGGVEKVYSLKPVGTLLLRDAERSMVP MILG  
MTQKDFMVSWHFMKEGLGNGSTTAFEKGMGMDIWKYLEGNPDQSQLFNEGMAGETRL  
LTKTLIEDCRDTFQGLDSLVDIGGGNGTTIKAIYEA FPHIKCTLYDLPHVVANSHDLPNIEK  
VPGDMFKSVPSAQAILLKLILHDWTDEECVNILKKCKEAI PKETGKVIIVDVALEEE SNHEL  
TKTRLILDIDMLVNTGGRE RTADDWENLLKRAGFRSHKIRPIRAIQSVIEAFP

>Pso6OMT

METVSKIDQQNQAKIWKQIYGFAESLVLKCAVQLEIAETLHNNVKPMSLSELASKLPVAQP  
VNEDRLFRIMRYLVHME LFKIDATTQKYS LAPPAYLLRGWEKSMVDSILCINDKDFLAP  
WHHLGDGLTGNCDAFEKALGKSIWVYMSVNPEKNQLFNAAMACDTRLVTSALANECKS  
IFSDGISTLVDVGGGTGTAVKAISKAFPDIKCTIYDLPHVIADSPEIPNITKISGDMFKSIPSAD  
AIFMKCILHDWNDDECIQILKRCKEALPKGGKVIIVDVVIDMDSTHPYAKIRLTLDLDMML  
NTGGKERTKEEWKTLFDAAGFASHKVTQISAVQSVIEAYPY

>Pso6OMT2

METVSKIDQQNQAKIWKQIYGFAESLVLKCAVQLEIAETLHNNVKPMSLSELASKLPVAQP  
VNEDRLFRIMRYLVHME LFKIDATTQKYS LAPPAYLLRGWEKSMVDSILCINDKDFLAP  
WHHLGDGLTGNCDAFEKALGKSIWVYMSENPEKNQLFNAAMACDTRLVTSALANECKS  
IFSDGISTLVDVGGGTGTAVKAISKAFPDIKCTIYDLPHVIADSPEIPNITKISGDMFKSIPSAD  
AIFMKCILHDWNDDECIQILKRCKEALPKVGKVIIVDVVIDMDSTHPYAKIRLTLDLDMML  
NTGGKERTKEEWKTLFDAAGFASHKVTQISAVQSVIEAYPY

>Pso7OMT

MDTAEERLKGQAEIWEHMF AFVDSMALKCAVELGIPDIINSHGRPVTISEIVDSLKTNT PSS  
SPNIDYLT  
RIMRLLVHKRLFTSELHQESNQ LLYNLTRSSKWLLKDSKFNL SPLVLWETNPILLKPWQYL  
GKCAQEKSSPFERAHGCEIWDLALADPKFNNFLNGAMQCSTTTIINEMLLEYKDGFSGIA  
GSLVDVGGGTGSIIAEIVKAHPHIQGINFDLPHVVATAAEFPGVKHVGGDMFVDIPEADAVI  
MKWILHDWSDEDCTIILKNCYRAIRKKKNGKVIIVDCVLRPDGNDLFDKMGLIFDVLMM  
AHTTAGKERTEA EWKILLNNAGFPRYNVIRTPAFPCII EAFPE

>PsoCaOMT

MGSIRNVDEDIQACRYAMELASASVPVMVLKTAIELDILEI IKKPGPGTQISVSEIVSQIQNL  
KNPDAPV  
MLDRMLRLLASYNILTC SLKDGGNDDKVERLYGLAPVCKFLT KNEAGCSMSALLLMNQD  
KVLME SWYHLKDAILDGGIPFNKAYGVHAFEYHGKDLRFNKVF NKGMSDHTTITM NKIL  
ETYKGFEGLSIVDVGGGVGATVSMIISKYPTIQGINFDLPHVIQDAPSFPGIKHVGGDMFA  
SVPNADAIFMKWILHDWSDEHSVKILKNCYDALPKNGKVIIVECI IPEVSDSSVAGHG VFH  
LDNIMLAHNPGGKERSLKQFENLAKDTGFTDFQVVCSAYDTYVMEFYKN

>PsoOMT2

MEIQMGDQEQEMKNQGLVWNKICGSVDSSVLKCTIELGLLDTINSSSSKPMITLSELSSTS  
PSLHSIKTQNLRYLLRYLTHMNLITINSTEATESFSLTDLAKLLLKTQERSLKDWVLGIDDE  
HSVNGWHELSSYCCSPDDAPTPFVKLHGKTLWELAE EVPEVNELINNGMACDTRMVM P  
AFVQGCEKVLSGIRKLVDIGGGTGAAISYVVKAFPQIKGTVLDLPHVVATAPEIPGVEMVG  
GDMFESIPHADALLLKFMLHNWKDEECIKLLKRCKEAIPTDQ GKVIIIEMVLDQDEDD E  
LTQARLSLDLDMMLSSGGKERTKDEWRVLLESAGFSRIE FIPIYAIQSVIVAYP

>PsoOMT

MEATKSDQANQANIWKLIYGFAESLVLKCAIQLEIADTIHNGEPMSLSELASKLPVQPVN  
SDRLYRVMRYLVHMKLFNKEKTSINGEFKYSLAPPAKFLIKGWEKSMVASILAINDKDFLA  
PWHHLKDGLSGDCDAFEKALGKSIWVYMSENPEKNQLFNEAMACDTRLVTSALVNDCQ  
SVFKGINTLVDVGGGTGTAVKAISKAFPHIKCSIYDLPHVIADSPEIPNVVKIEGDMFKAIPS  
ADAILMKCILHDWNDDECIQILKKCKEAVPQEGGKVIIVDVVLNMDLTHPYSKIRLTLDLD  
MMLNTGGKERTVEEWKKLIDAAGFASFKITEISAVQSVIEAFPY

>PsoOMT3

MEVVSQIDQENQAKIWKQIFGFAESLVLKCAVQLEIAETLHNNVKPMSLSELASKLPAQPV  
NEDRLYRILHFLVHMKLFNKDATTQKYSLAPPAKYLLKGWEKSMVPSILSVTDKDFTAPW  
NHLGDGLTGNCNAFEKALGKGIRVYMRENPEKDQLFNEGMACDTRLFASALVNECKSIFS  
DGINTLAGVGRGTGTAVKAISKAFPDIKCTIHDLPVTSKNSKIPRDVFKSVPSADAIFMKSI  
LHEWNDEECIQILKRCKEAIKGGKVIADVIDMDSTHPYKSRLAMDLMMLHTGGKE  
RTEEDWKKLIDAAGFASCKITKLSALQSVIEAYPH

>PsoN7OMT

MEVVSQIDQENQAIWKQIYGFSESLLLKCAVQCEIAETIHNHGTTPMSILELAAKLPIQPV  
NIDRLYRV  
MRYLVHQKLFNKEVISTLNGGTQVTEKYWLAPPAKYLRGSQQSMVPSVLGIIDEDMFA  
PWHILKDSLTGECNIFETALGKSISVYMSENPEMNQISNGAMAFDSGLVTSHLVNECKSVF  
GDEIKTLVDVGGGTGTALRAISKAFPNIKCTFLDLPVIADSPEIPTITKVS GDMFKSIPSAD  
AIFMKNILHDWNDDECIQILKRCKDVVSAGGKLIMVEMVLDEDSFHPYSKLRLTSDIDMM  
VNNGGKERTEKEWEKLFDAAGFASCKFTQMSVGFAAQSIIEVY

>PsoSOMT

MATNGEIFNTYGHNQRQTATVTKITASNESSNGVCYLSETANLGKLCIPMALRAAMELNVF  
QLISKFGTDAKVSASEIASKMPNAKNNPEAAMYLDRLRLLGASSILSVSTTKKSINRGGD  
DVVVHEKLYGLTNSSCCLVPRQEDGVSLVEELLFTSDKVVVDSFFKLKCVVEEKDSVPFE  
VAHGAKIFEYAATEPRMNQVFNDGMAVFSIVVFEAVFRFYDGFDMKELLDVGGGIGTSV  
SKIVAKYPLIRGVNFDLPHVISVAPQYPGVEHVAGDMFEEVPKGQNMMLLKWVLHDWGDE  
RCVKLLKNCWNSLPVGGKVLHIEFVLPNELGNNAESFNALIPDLLLMALNPGGKERTISEY  
DDLGAAGFIKTIPIISNGLHVIEFHK

>PsoNaOMT

MEIHLESQEEMKYQSQIWNQICGTVDTSVLRCAIQLGIFDAIHNSGKPMITLTELSSIVSSP  
SSSSIEP  
CNLYRLVRYLSQMDLISIGECLNEATVSLTGTSKLLLRNQEKSLIDWVLAIXCEMMVVVW  
HELSSSVSTPADEPPIFQKVHGKNALELAGEFPEWNDLINNAMTSDTSVTKPALIQGCGKIL  
NGVTSIDVGGGHGATMAYIVEAFPHIKGAVIDLPHVVEAAPERPGVEFISGDIFKSISNAD  
AVLLKYVLHNWEDTECVNLLKRCKEAVPADKGKVIIMDLVIDDDDNSILTQAKLSLDLTV  
MNHGGGRERTKEDWRNLIEMSGFSRHEIIPISAMPSIIVAYP

>Psa6aOMT

MDFSTNGSEESELYHAQIHLYKHVYNFVSSMALKSAMELGIADAIHNGKPMITLPELSSS  
LKLHPSKVNIYRFLRLTHNGFFAKTTVKSNEGEEETAYVLTSSKLLVSGKSTCLSSLVK  
GALHPSSLDMWGVSKKWFHEDKEQTLFECATGENYWDFLNKDSDSLMSFQDAMAADS  
RLFKLAIQENKHVFEGLESVDVAGGTGGVAKLIHEAFPHIKCTVFDQPQVVGNTGNENL  
NFVGGDMFKSVPADAVLLKWVLHDWNEDELSLKILKNSKEAISHKGKDGKVIIDISIDEN



SDDRGLTELQLEYDVVMLTMFLGKERTKKEWEKLIYDAGFSRYKITPIC  
GFKSLIEVYP

>PtaCaOMT

MDSNMNGLAKSNGCEISRDGFFESEEEELQGQAEAWKCTFAFAESLAVKCVVLLGIPDMI  
AREGPRATLSLCEIVANLPTESPDAACLFRIMRFLVAKGIFPASKSARRRAFETRYGLTPASK  
WLVKGRELSMAPMLLMQNDETTLAPWHHFNECVLEGGVAFQKANGAEIWSYASDHPDF  
NNLFNNAMACNARIVMKAILSKYQGFHSLNSLVDVGGGTGTAVAEIVRAYPPFIRGINYDLP  
HVVATASSLSGVQHVGGDMFETVPTADAIFMKWIMHDWNEDECIKILKNCRKAIPDTGK  
VIIVDVVLADQGDNTDKKRKKAVDPIVGTVFDLVMVAHSSGGKERTKEKEWKRILEGGF  
SRYNIIIEIPALQSVIEAFPR

>PtrCaOMT

MGSTGETQMTPTQVSDEEAHLFAMQLASASVLPMLKTAIELDLLEIMAKAGPGAFLSTSE  
IASHLPTKNPDAPVMLDRILRLLASYSILTCSLKDLDPDGKVERLYGLAPVCKFLTKNEDGV  
SVSPLCLMNQDKVLMESWYYLKDAILDGGIPFNKAYGMTAFEYHGTDPRFNKVFNKG  
SDHSTITMKKILETYKGFEGTSLVDVGGGTGAVVNTIVSKYPSIKGINFDLPHVIEDAPSY  
PGVEHVGGDMFVSVPKADAVFMKWICHWDSDAHCLKFLKNCYDALPENGKVILVECILP  
VAPDTSLATKGVVHVDVIMLAHNPGGKERTKEFEGLAKGAGFQGFEVMCCAFNTHVIE  
FRKKA

>PtrCCoA3OMT

MATNGEEQQSQAGRHQEVGHKSLLQSDALYQYILETSVYPREPECMKELREVTAKHPWN  
IMTTSADEGQFLNMLLKLNAKNTMEIGVYTGYSLLATALAIPEDGKILAMDINRENYEL  
GLPVIQKAGVAHKIDFKEGPALPVLQMIEDGKYHGSFDFIFVDADKDNINYHKLRIELV  
KVGGLIGYDNTLWNGSVVAPPDAPMRKYVRYRDFVLELNKALAADPRIEICMLPVGDG  
ITLCRRIQ

>ParOMT

MGSVRASHELLQAQAHIWNIHFSFINSLSLKCAVQLDIPDVIQKHGQPMTLSELVSALPISP  
TKAHFIPRLMRILVHSGFFAKESLSGCGEQGYILTDASALLLKDNPMSPARPFLAMLSPILT  
DPYQYLTTWFQNDNPTPFHVVNGMTCWDYVNQDPTLAHFFNDAMASDAQLISSLVIDDC  
KEVFQGVDSLVDVGGGTGTVAKSIADAFPHMKCTVLDLPHVVADLKGSKNLEYVAGDM  
FEAVPAADAIFLKWILHDWSDEECVKILERCKAAVTREGKKGKVIIVEMTVENKNTDKES  
GETQLFFDMHMMVMSTGKERNEKEWAKLFSDAGFSQYKITPLFGFKSLIEVYP

>PduCaOMT

MGSTGETQMTPTQVSDEEANLFAMQLASASVLPMLKAAIELDLLEIMAKAGPGVFLSPT  
DIASQLPTKNPDAPVMLDRMLRLLASYSILTYSLRTLADGKVERLYGLGPVCKFLTKNEEG  
VSIAPLCLMNQDKVLLESWYHLKDAVLEGGIPFNKAYGMTAFEYHGTDPRFNKVFNRGM  
ADHSTITMKKILETYKGFEGTSSVVDVGGGTGAVLNMIVSKYPSIKGINFDLPHVIEDAPQ  
YPGVEHVGGDMFVSVPKGDAIFMKWICHWDSEHCLKFLKNCYAALPDNGKVILGECIL  
PVAPDSSLATKGVVHIDVIMLAHNPGGKERTEQEFQALAKGAGFQGFNVACSAFNTYVIE  
FLKKN

>PduOMT

MDLSNEMSSANLLQAQAHIWNCIFSFINPMSLKCAVQLGIPDIIKKHGNPMSLSDLISALPI  
HPKKSNCVYRLMRILVHSGFFCRQKLSLDEEEGYVLTASRLLKDDPLSARPFLLGALD  
PFMTKPWHYFSTWFQNDPTACVTAHGTTFWDFGCLEPSLSHIFNDAMASDARLISKVVS  
NEYKGVFEGLESLVDVGGGIGTMPKAIADVPHVECIVFDLPHVVADLKGSENKFFGGD

MFEAIPPTDAILMKWILHDWSDEECIKILQRSKEAITRKEKKGKVIIVDMVMKQKGDDQSI  
ETQLFFDMLMMVLFTGKERTEKEWAKLFSDAGFSDYKITPICGLRYLIEVYP

>PpyOMT

MSSSNAVGATSHELLGAQAQLWNHIFQFINSMSLKCQVQLGIADVIHNHGQPISLSELIAGL  
NVHPSKAHFVSRLMLILVHSNFFAQHHHVHHDRADEVVEEEAVVLYSLTPSSRLLLKDGPFS  
TTPFLLATLDPVVTTPFHLMGAWLKINGGDDPGATCTPFEMENGMPFWELGAQEPRFGNL  
FNEAMEADSKLIGRVVVEECGGVFEGLSLMDVGGSGTMAKAIANAFPNINCTVFDQP  
HVVAGLQGTTHNLGFMGGDMFEEIPPANAILLKWIMHDWNDEESVTILKKCREAISLSKN  
EGGNKKIIIDIVVGYVDNKKKMMDKKSIETQLMFDMLMMSILPGKERSKLEWEKIFFSA  
GFTHYNITHTLGLRSLIEVYP

>PraCaOMT

MDSNMNGLAKSNGCEISRDGFFESEEEELQGQAEAWKCTFAFAESLAVKCVVLLGIPDMI  
AREGPRATLSLGEIVAKLPTESPDAACLFRIMRFLVAKGIFRASKSAREGGAFETRYGLTPAS  
KWLVKGRELSMAPMLLMQNDETTLPWHHFNECVLEGGVAFQKANGAEIWSYASDHPD  
FNNLFNNAMACNARIVMKAILSKYQGFSLSLSLVDVGGGTGTAVAEIVRAYPFIRGINYDL  
PHVVATASSLSGVQHVGGMFETVPTGDAIFMKWIMHDWNDEDCIKILKNCRKAIPDTG  
KVIIVDVVLADQGDNTDKRKKAVDPVIGTVFDLVMVAHSSGGKERSEKEWKRILEG  
GFSRYNIIIPALQSVIEAFPR

>RhcOrOMT

MERLNSFRHLNQKWSNGEHSNELLHAQAHIWNHIFSFINSMSLKSAIQLGIPDIINKHGYP  
MTLSELTSALPIHPTKSHSVYRLMRILVHSGFFAKKKLSKTDEEGYTLTDASQLLLKDHPLS  
LTPYLTAMLDPVLTNPWNYLSTWFQNDPTPFDTAHGMTFWDYGNHQPSIAHLFNDAMA  
SDARLVTSVIINDCKGVFEGLESLVDVGGGTGTAKAIADAFPHIECTVLDLPHVVADLQG  
SKNLKYTGGMFEEAVPPADTVLLKWILHDWSDEECIKILERSRVAITGKEKKGKVIIDMM  
MENQKGDEESIETQLFFDMLMMALVGGKERNEKEWAKLFTDAGFSDYKITPISGLRSLIE  
VYP

>She6OMT

MEAQKENISSQAKLWNFIYGFAESVLKCAVELDFANIIHNHGKPMTLSELASQLPVMQPV  
NTNSLYRVMRYLVHINIFTKTLDENDGETKYGLAAPAKFLVKGWDNCMVGSILGITDKVF  
MEPWYYIKDELAPGTGTAFELALGKDIWEYMGENPEKNKLFNAAMACDTSMIMSALISE  
CKDKFNGIRTLVDVGGGTGTAARNIARAFPNIKCTVYDLPHVIADSPVYPEINRVSGDMFK  
CIPNADAILMKCILHDWEDKECIEILKRCKEAVPVDGGKVIIDVVLGDGESEHPYTKVRLNS  
DLDMMLNTEGKERTKEGWKKLFKAAGYRDYNITQISALQSVIEAFPY

>Tfl4'OMT

MAAFQGKDASVDIKAQAHVWKIYGFADSLVLRCAVELGIFDIIDNNNQPIPLADLASKLPI  
SNVNLNLFRIILRYLVKMELLSYAADDKYALEPIAKLVLNRNEKRSMPVPMVLGMTQKDFM  
TPWHSMKDGLTDNGVTAFEKAMGMTIWEYLEGHPDQSQLFNEGMAGETRLLTSSLISGS  
KDMFQSIDSLSVDVGGGNGTTIKAISVAFPHIKCTLFDLPHVIANSYDHPNIERIGGDMFKG  
MPSAQAILLKLILHDWNDEDSIKILKQCRKAVPKDGGKVIIVDVALDEDSDELSSSTRLILD  
IDMLVNTGGKERTKEDWEKLVKAGFSGCKIRHIAAIQSVIEVFP

>Tfl6OMT

MEMINKENLSSQAKLWNFIYGFADSLVLKSAVQLDLANIIHNHGSPMTLSELSLHLPSPV  
NQDALYRVLRYLVHMKLFTKSSIDGELRYGLAPPAKFLVKGWDKCMGLGAILTITDKDFMA  
PWHYKLEGILNDGSTSTAFEKALGTNIWDYMAEHPEKNQLFNEGMANDTRLIMSALVKE

CSSMFDGITTIVDVGGGTGTAVRNIAKAFPHIKCTVYDLPHVIADSPGYTEINSIQGDMFKY  
IPNADAIMMKCILHDWDDKECIEILKRCKDAVPRDGGKVIIDILDKSEHPYTKMRLTLD  
LDMMLNTGGKERTEEEWKKLIHDAGYKGYKITHISAVQSVIEAYPY

>TfiSOMT

MALQEGVNYLSGLGLSRLICLPMALRAAIELNVFEIIFQAGPEAQLSPAIEIVAKIPTKNPNA  
AIALDRIL

RMLGASSILSVTTMKDGRVYGLTEESRCLVADKNGVSVVPMLLFTSDKAVVESFYNIKDV  
VLEEGVIPFDRTHGMDFFAYAGKEQSVNKSFNQAMGAGSTIAFDEVFKVYKGFHDLKELV  
NVGGGIGTSLSNIFKYPHIKGINFELPHVIADAPNYPGVEHIAGNMFEGVPNAQNILLKWV  
LHDWDDERSIKILQNCWKALPEGGTIVVVEFVLPQILGNNAESFNALTPDLLMMTLNPGG  
KERTTTEFDGLAKAAGFAETKFFPISQGLHVMEFHKATAGVAS

>TtuCaOMT2

MGSTQKNHNLTPEEEEEACLHAMQLASASVLPMLVKA AIELSVLEIIAKAGQGAYVAPTEI  
ASQLSTSNSQAPIILDRILRLASYKVLTCLNRLTLEDGGVERLYGLAPVCKFLVKNE DGVSI  
APLVLMNQDKVLMESWYHLKDAVLDGGIPFNKAYGMTAFEYHGTDPRFNKVFN RGMA  
DHSTITMKKLELYKGFEGLSVVDVGGGTGATINMIVTKHPTIKGINFDLPHVIDDAPAY  
PGVEHIGGDMFVSVPKGDAIFMKWILHDWSDEHSVKFLKNCYESIPADGKVIIVESILPVY  
PETNLASNACFQLDNIMLAHNPGGKERTEKDFEALSAKAGFTGFKIVCGAFGSWVMEFC  
K

>TtuCaOMT4

MGSTENNNHNLTPEEEEEACLHAMQLASASVLPMLVKA AIELDVLEIIAKAGKGAYVAP  
SEIASQLSTSNSQAPTVLDRMLRLASYKVLTCLNRLNLEDGGVERLYGLAPVCKFLVKNE  
DGVSMAPLVLMNQDKVLMESWYHLKDAVLDGGIPFNKAYGMTAFEYHGTDPRFNKVFN  
RGMADHSTITMKKLELYKGFEGLSVVDVGGGTGATVNMIVTKHPTIKGINFDLPHVID  
DAPAYPGVEHIGGDMFVSVPKGDAIFMKWILHDWSDEHSVKFLKNCYESIPADGKVIIVES  
VLPVPETNLAAHTCFQLDNIMLAHNPGGKERTEKDFKALSVKAGFTGFKVVC GAFGSW  
VMEFCK

>TtuCaOMT

MGSTENNNHNLTPEEEEEAYLHAMQLASASVLPMLVKA AIELDVLEIIAKAGKGAYVAP  
SEIASQLSTSNSQAPTVLDRMLRLASYKVLTCLNRLNLEDGGVERLYGLAPVCKFLVKNE  
DGVSMAPLVLMNQDKVLMESWYHLKDAVLDGGIPFNKAYGMTAFEYHGTDPRFNKVFN  
RGMADHSTITMKKLELYKGFEGLSVVDVGGGTGATVNMIVTKHPTIKGINFDLPHVID  
DAPAYPGVEHIGGDMFVSVPKGDAIFMKWILHDWSDEHSVKFLKNCYESIPADGKVIIVES  
VLPVPETNLAAHTCFQLDNIMLAHNPGGKERTEKDFKALSVKAGFTGFKVVC GAFGSW  
VMEFCK

>TtuCaOMT3

MGSTQKNHNLTPEEEEEACLHAMQLASASVLPMLVKA AIELDVLEIIAKAGQGAYVAPTE  
IASQLSTSNSQAPIILDRVLRLASYKVLTCLNRLTLEDGGVERLYGLAPVCKFLVKNE DGVSI  
IAPLVLMNQDKVLMESWYHLKDAVLDGGIPFNKAYGMTAFEYHGTDPRFNKVFN RGMA  
DHSTITMKKLELYKGFEGLSVVDVGGGTGATINMIVTKHPTIKGINFYLP HVIDDAPAY  
PGVEHIGGDMFVSVPKGDAIFMKWILHDWSDEHSVKFLKNCYESIPADGKVIIVECILPVY  
PETNLASNACFQLDNIMLAHNPGGKERTEKDFEALSAKAGFTGFKIIC  
GAFGSWVMEFCK

>TtuCaOMT5

MGSTQNNHNLTPEEEEEACLHAMQLASASVLPMLKAAIELDVLEIIAKAGQGAYVAPSE  
IASQLSTSNSQAPIILDRILRLLASYKVLTCNLRTLEDGGVERLYGLAPVCKFLVKNEDGVS  
MAPLVLMNQDKVLMESWYHLKDAVLDDGGIPFNKAYGMTAFEYHGTDPRFNKVFNRGM  
SDHSTITMKKLELYKGFEGLSVVDVGGGTGATVNMIVTKHPTIKGINFDLPHVIEDAPA  
YPGVEHIGGDMFVCVPGKDAIFMKWILHDWSDEHSVKFLKNCYESIPADGKVIDVESILP  
VCPETNLAANACFQLDNIMLAHNPPGGKERTEKDFEALSVKAGFTGFKVVCAGAFGSWVM  
EFCK

>TaeOMT

MALTGDYKLISTDDMLQGHAELCIHAYGFVKSMALKCAIELGIPGAIHGHGGGATLGELA  
TIALPPSRL

PRLRRLMRVLTVSGVFSVQNQQPDDPAGCAAVVYGLTAASRLLVGDGESIVGAAPPRSLM  
VDPNLTAPFSGMSAWFMDDEQPRSFFEMHHGEDMWEMAARDAALSRTIGDGMTDDSRF  
VVEVLLREGRARDVFSGVRSMVDVGGGTGTIAKAAAAFPHVECSVLDPHVVAEAPAG  
GEVRFIEGDMFEHIPPADAVLLKSVMHDWRDDECVKILRRCKEAIPSREAGGKVIIINMVV  
GSEKSKGNSTKKGGGTSIVRSSSSWFLREVNEKSMSGRRSFLEAGFSGYSIIPMLGIRSIIEV  
YP

>VviCaCoAOMT

MATNQEAGRHQEVGHKSLLQSDALYQYILETSVYPREPESMKELRELTQHPWNIMTTSA  
DEGQFLNMLLKLINAKNTMEIGVYTGYSLLATALALPDDGKILAMDINKENYELGLPVIQ  
KAGVAHKIDFKEGPALPVLQMIEDGKYHGSFDFIFVDADKDNLYLNYHKRLIDLKVGGI  
IGYDNTLWNGSVVAPPDAPLRKYVRYRDFVLELNKALAADPRIEICMLPVGDGITLCRR  
LS

>ZmaOMT

MGSTAGDVAAVVDEEACMYAMQLASSSILPMTLKNAIELGLLEVLQKEAGGGKAALAPE  
EVVARMPAAPSDPAAAAAMVDRMLRLLASYDVVRCQMEDRDGRYERRYSAAPVCKWL  
TPNEDGVSMALALMNQDKVLMESWYYLKDAVLDDGGIPFNKAYGMTAFEYHGTDARF  
NRVFNEGMKNHSHVITKKLLDFYTGFEVSTLVDVGGGVGATLHAITSRPHISGVNFDLP  
HVISEAPPFPGRHVGGDMFASVPAGDAILMKWILHDWSDAHCATLLKNCYDALPENGK  
VIVVECVPVNTEATPKAQGVFHVDMIMLAHNPPGGKERYEREFRELAAGAGFSGFKATYI  
YANAWAIEFIK

>ZelCaCoA3OMT

MATPTGETQPAKHQEVGHKSLLQSDALYQYILETSVYPREPQPMKELRRITAKHPWNLMT  
TSADEGQFLNLLLKLINAKNTMEIGVYTGYSLLSTALALPEDGKILALDINRENYEIGLPIIQ  
KAGVAHKIDFREGLPLLDQMLQDEKCHGSFDFIFVDADKDNLYLNYHKRLIDLKFGGV  
IGYDNTLWNGSLVAPADAPLRKYVRYRDFVLELNKALAVDPRVEICQLPVGDGITLCRRI  
S

>ZelCa3OMT

MGSNQDDQAFLFAMQLASASVLPMLKTAIELDLLETIAKAGPHGSVSSSELVAQLPKVN  
NPEAPVMIDRICSLLASYSVLTCTLKETADGCAERFYGLAPVCKFLIKNDAGVSLAPLLLM  
NQDKVLMESWYYLKDPVLDDGGIPFNKAYGMSAFEYHGKDQRFNKFVNSGMFNFHSTMT  
MKKIVELYNGFSGLKTLDVGGGTGASLNMITSKHKSLKGINFDLPHVIADATTYQGIEHV  
GGDMFESVPGKDAIFMKWILHDWSDAHCLQVLKNCYKSLPENGKVIVAECILPEAPDTTP  
ATQNVIHIDVIMLAHNPPGGKERTEKEFEALAKGAGFKGFNKAACALNTWVMEFCK

## P450

>CyNMCH

MEILSIAILSLVISTLIYYIFFSDSKALKGLPPGPKWPPIVGNLLQLGEKPHSQFAEMAQTYG  
DLFTLKMGTQTVVVASTPSSAIEILKTHDRLLSARYVFQSFVRPNHVNSMVWSDCNEVW  
KMLRKVCRTTELFTPKMIESQAHVRESKAMEMVKFLKGKQGGEVKIAEVVFGTLVNIFGN  
LIFSQDVFEELGDPSSGSAEMKEHLWRMLELGNSTNPADYFPILGRFDLFGQRKDVAECLR  
LIYDVWGVMLKERKVKKAAQGGKGNNDNFVDVLLDSGLDDFQINALLMELFGAGTET  
SSSTIEWAIAELTKNPHITAKIRAELESVVGQSPIKESDIPNLPYLQACTKETLRLHPPTPLLL  
PRRAIETCQVMNYTIPKDCQIMVNAWAIGRDPKIWKDALKFSRPERFLNSSVDFKGNDFELI  
PFGAGRRIKCPGVPLATQFISLIVATLVQNFENLPLNGMDPKDLVMDEKFGLTLQKEPPPLYIV  
PKSRV

>CyCYP51

MDLEENKLLNIGILIVATLLIAKLVSVVLFPSSSKRRRLPPTVGAWPLVGGILRFMKGPV  
MLREEYPKLGSVFTLNLLNKNITFFIGPEVSSHFFKASESDLSQQEVYQFNVPTFGPGVVF  
DVDYSVRQEQRFFTEALRVNKLKAYVDQMVTEAEDYFSKWGESGEVDLKYELEHVIL  
TASRCLLGREVRDKLFDVVSALFHDLDNGMLPISVIFPYLPIPAHRRRDQARKKLSQIFANI  
GSRKETGKSENDMLQCFIESKYKDGRPTTESEVTGLLIAALFAGQHTSSITSTWTGAYLFQ  
NKEFLSAVLDEQKSLVKKHGDKIDHDILSEMDVLYRCIKEALRLHPPLILLRSSHTEFSVK  
TPEGKEYDIPKGHIVATSPAANRLPHVFTNPDTYDPNRFVAVGREEDKAAGAFSYISFGGGR  
HGCLGEPFAYLQIKAIWSHLLRNFEFELISPFPEIDWSAMVVGVKGKVMVRYKRRQLCVE

>PsNMCH1

MEIVTVSLVAVVITTFLYLIFRDSSPKGLPPGPKWPPIVGNLLQLGEKPHSQFAQLAETYGD  
LFSCLKGSETVVVASTPLAASEILKTHDRVLSGRYVFQSFVRKEHVENSIWSECNETWKK  
LRKVCRTTELFTQKMIESQAEVRESKAMEMVEYLKKNVGNVNEVKIAEVVFGTLVNIFGNLIF  
SQNIFKLGDDESSGSVEMKEHLWRMLELGNSTNPADYFPFLGKFDLFGQRKDVAADCLQGIY  
SVWGAMLKERKIAKQHNNSSKKNDFVEILLDSGLDDQINALLMEIFGAGTETSASTIEWA  
LSELTKNPQVTANMRLELLSVVGKRPVKESDIPNMPYLQAFVKETLRLHPATPLLLPRRAL  
ETCKVLNYTIPKECQIMVNAWGIGRDPKRWDPLKFSPERFLNSSIDFKGNDFELIPFGAG  
RRICPGVPLATQFISLIVSSLVQNFWDWGLPKGMDPSQLIMEEKFGLTLQKEPPPLYIVPKTRD

>PsNMCH2

MEIVTVSLVAVAITTFLYLIFRDSSPKGLPPGPKWPPIVGNLLQLGEKPHSQFAQLAETYGDL  
FSLKLGSETVVIASTPLAASEILKTHDRVLSGRYVFQSFVRKEHVENSIWSECNDTWKKL  
RKVCRTTELFTQKMIESQADIREKAMEMVKYLKKNEGNEVKIVEVFGTLVNIFGNLIFSQ  
NIFKLGDDESSGSVEMKEHLWRMLELGNSTNPADYFPFLGRFDLFGQRKDVAADCLQGIYSV  
WGAMLKERKIPKLHNNSKKNDFVEILLDSGLDDQINALLMEIFGAGTETSASTIEWALSE  
LTKNPDV TANMRSELLSVVGKRPVKESDIPNMPYLQAFVKETLRLHPATPLLLPRRALETC  
KVLNYIIPKECQIMVNAWGIGRDPKRWDPLKFSPERFLNSSIDFKGNDFELIPFGAGRRIK  
PGVPLATQFISLIVPTLVQNFWDWGLPKGMDPSQLIMEEKFGLTLQKEPPPLYIVPKTRD

>PsNMCH5

MEIVTVLIAIVFTTFLYLIVRESSPKGLPPGPKWPPIVGNLLQLGEKPHSQFAQLAETYGDL  
FTLKLGTQTVVVASTPLAASEVLKTHDRTLGCRYVFQSFVRKKHVENSIWNECNETWK  
KLKVCRTQLFTQKMIENQAEVREIKTMEMVEYLKKNEGIEVKIVEVIFGTLVNMFGNLIF  
SQDIFKLGDDESSGSLEMKQHIWRMLELGN SANPGDYVPLLGSLLDFGQRKDVAADCLQGV  
YGVWGAMLKERKIAKQQINGDTKNDFVDVLLDSGLDDQINSLLLDMFSAAGTETTASTIE

WALTELTKNPQVTVNIRSELLSVVGKRTVKESDIPNLPYLQAFVKETLRLHPPTPLLP  
LETCVHVNLTIPKECQIMVNAWGIGRDPKTWTDPLKFSPDRFLNSSIDFKGNDFELIPFGA  
GRRICPGVPLATQFISLIVLAVLQNFWDWELPKGMDRSQLIMEEKFGLTLQKEPPYIVLKTR  
D

>EcNMCH3

MEVVTVALVAVLISSILYLIFGGTHHKNLPPGPKPWPIVGNLLQLSDRPHSQFAELAKIYGD  
LFTLRLGSETVVVASTPAAAAEIIKTHDRIFSGRYVFQSFRVKNNIENSIVWAQCNDWSKLN  
RKICRTEIFTQKMIESQAHVRERKCLEMVEYLGKKGEEVKIVEVIFGTLVNIFGNLIFSQN  
VFKLGDESSGSTEMKEHLWKMLELGNSTNPADYFPILGRFDLFGHRKEVLDCLQGIYNV  
WGAMLNERKSAMKLAGYERKNDFVDICLDAGLNDDQINSLFMVSSHDLFGAGTETSAS  
TTEWAITELTRNPQVTAKIRSELQTVVGERPVKESDFPNLPYLQATVKETLRLHPPTPFLLP  
RLALDTCQVLNYTIPKNCQVMVNAWAIGRDPKNWTDPLTFSPERFLESKVDFKGTDFELIP  
FGGRRICPGIPLANQFISLLIATMVHNFEWVLPNGMDPSRLIMEEKFGLTLQKEPPLSIVP  
KSIA

>EcNMCH4

MEVVTVALIAVISSILYLLFGSSGHKNLPPGPKPWPIVGNLLQLGEKPHAQFAELAQTYGD  
IFTLKMGTTETVVVASTSSAASEILKTHDRILSARYVFQSFRVKGHVENSIVWSDCTETWKN  
LRKVCRTTELFTQKMIESQAHVREKKCEEMVEYLMKKQGEVKIVEVIFGTLVNIFGNLIFS  
QNIFELGDPNSGSSEFKEYLWRMLELGNSTNPADYFPMLGKFDLFGQRKEVAECLKGIYAI  
WGAMLQERKLAKKVDGYQSKNDFVDVCLDSGLNDYQINALLMELFGAGTETSASTIEW  
AMTELTKNPKITAKLRSELQTVVGERSVKESDFPNLPYLEATVKETLRLHPPTPLLP  
ETCTILNYTIPKDCQIMVNAWGIGRDPKTWIDPLTFSPERFLNSSVDFRGNDFSLIPFGAGR  
RICPGLPIANQFIALLVATFVQNLDWCLPNGMSVDHLIVEEKFGLTLQKEPPLFIVPKSRVGS

>TfNMCH

MEVLSAAMVSLFFIFLFIFFILCDSRNKDLPPGPRPSPIVGNLLQLGEKPHAEFAKLAEKYG  
ELFTLKLGSQTVVASSPAAAAEILKTRDKILSGRYVFQSFRVYEHVLSIVWSECNENWK  
LLRKVCRTELFSPKMIESQAYIREAKALDMVRFLRKKNQEVKIVEVVFNTLVNIFGNLIFS  
KDVFLEDPTGGSSELKEHLWKLLDMGNSTNPADYFPIMGKFDLFGQRREVAKVLKQIY  
DVWGVMLKERRSITGHRENDFANVLLNAGLDDQKINALLMELFGAGTETTASTIEWAITE  
LTNNLRVISKLRAELINVVGHKTVKESNIPHLPYLQAIVKETLRLHPPTPLLP  
VMNYTIPKECQIMVNAWAIGRDPKTWDDPLTFKPERFMNSTVDYKGNDFELIPFGGRRIC  
CPGLPLASQFLSLIVATLVQNFWDWSFPQGMTPNEVPMDEKFGLPLQKDPPLLVLKARTSM  
KLQD

>NtNMCH1

MGKMPHITLTNFAKTYGPLMSLKLGTQCLVVGSSPSAAIEILKTHDRILSGRHVPNAFPFK  
KSELEKSSIGWTSECNNGWRYLRTLCTELFSGKVLESQACLREKKVKELIEFLRSKEGQL  
VNLGELIFATVLNMLSNVMISQDIVKLEKETEDGGMKSLIREAMEVGSTPNISDFYPILCKL  
DLQGLRRKSMVLMKIRSKTWERIVEERRKSKVSGSSQHDFLETLLNNGFTNDIAHQFL  
MELFTAGTDTTSTIEWAIAELIKNEESMEKVQAELERELRESYFPKESKLLQMSYIQACV  
KETLRLHPPGPFLPHRAIETCQVMSYTIPKDAQVLNVNVAIGRDSLWKEPEMFRPQRFL  
SSNMDFKGNDFEFLPFGSGRRICPGLPMAAKSVPLVLASLVHFFDWELPNGKCSIELDMNE  
KFGVTLQKREPLLLIPKARK

>NtNMCH2

MAQSYEILFLLPLFLLPLIFFLLKLCKSSKIPQLPPGPKPWPILGNIHMGKMPHITLTNFAKT

YGPLMSLKLGTQCLVVGSSPSVAIEILKTHDRILSGRHVPNAFPFKKSELEKSSIGWTSECN  
NGWRYLRTLCTELFSGKVLESQACLREKKVKELIEFLRSKEGQVVNLGELIFATVLNMLS  
NVMISQDIVKLEKETEDGGMKSLIREAMEVGSTPNISDFYPILCKLDLQGLRRKSMVLM  
KIRSKTWERIVEERRKSKESGSSSQHDFLETLLNNGFTNDAIHQLFMELFTAGTDTTSTIE  
WAIAELIKNEESMEKVRAELERELRESYFPKESKLLQMSYIQACVKETLRLHPPGPFLPH  
RAIETCQVMSYTIPKDAQVLNVWAIGRDSLWKEPEMFRPQRFLSSNMDFKGNDFEFLPF  
GSGRRICPGLPMAAKSVPLVLASLVHFFDWELPNGKCSIELDMNEKFGVTLQKREPLLLIP  
KATK

>CaNMCH1

MAQPFEILCLVPLFLLPLIIFIRVFKSSKITQLPPGPTPWPVIGNIFHMGKMPHITLTNFAKA  
YGPISLKFGTKWLTVVGSSPSVAIEILKTHDRILSARHVPNAVPSGSDLEKTSLGWNSGCSS  
RWRYLRTLCKTELFSGKVLESQACLREKKVKELVEFLRSKEGQVVNIGELVIATALNMLSN  
VLISKDMANFDNETEDGDIRNLVREIVEAVSAPNISDFYQILGKLDLQGLRKKISIRLVKFC  
KWEPILEERRDSRENGSSSQEELIELSKSDYLKESQLLQMSYVQACVKETLRLHPPAPLLL  
PHRAIETCKIMSYTIPKDTQILNVNWAIRDPSMWEEPEVFRPQRFLSSDMDFKGNDFEFLT  
FGAGRRICPGLPMAAIEVPLVLASLVHFFDWELPHGKCPAELDMTEKFGVTLQKKEPLLLI  
PKARK

>CaNMCH2

MAQPFEILCLVPLFLLPLIIFIRVFKSSKITQLPPGPTPWPVIGNIFHMGKMPHITLTNFAKA  
YGPISLKFGTKWLTVVGSSPSVAIEILKTHDRILSARHVPNAVPSGSDLEKTSLGWNSGCSS  
RWRYLRTLCKTELFSGKVLESQACLREKKVKELVEFLRSKEGQVVNIGELVFATALNMLS  
NVLISKDMANFDNETEDGDIRNLVREIVEAVSAPNISDFYQILGKLDLQGLRKKYINVAQ  
FRSKWEPILEERRNSRENGSSSQDQFLETLLDNDFTNDCTHQLFMELLSAGSDTITSTIEWA  
MAELIKNVEPMKKVQEELEIELSKSDYLKESQLLQMSYVQACVKETLRLHPPAPLLLPHR  
AIESCQVMSYTIPKDAQIMVNVWAITRDPLIWEPEMFRPQRFLRSDMDFKGNDFEFLPFG  
AGRRICPGLPMAAIIPLVLASLVHFFDWELPHGKCPAELDMTEKIGVTLQKKEPLLLIPKA  
RK

>CaNMCH3

MLSNVLISKDMINLDKETEDGGIKSLVRGIVEVASAPNISDFYPIFGKLDLQGLRKKISIRLV  
KFCSKWEPILEERRDSRENGSSSQDQFLETLLDNGFTNDRIHQLFMELLSAGSDTSTSTIEW  
AMAELIKDVESMKKVQEELEIESESDYLKESQVLNMSFVQACVKETLRLHPPVPFLLPHR  
AIETCQIMSYTIPKDAQIIVNVWAITRDPSIWEPEMFRPQRFLSSDMDFKGNDFEFLPFGA  
GRRICPGLPMAAIKVLLVASLVHFFDWELPHGKCAELDMTEKFGVALQKKEPLLLIPK  
ARK

>SINMCH1

MEYYTLPASFLIFIPFLLIFKQLVPKSTNLPPGPRPWHLGNLLQIGKTPHVSLAKFAQIHG  
PLISVKLGTQLVVVASSPASAAEILKSQDRLLSVRSVPKVATYELSVIDQHSIVFSSDLSNQW  
KFLRAFCTRHLFSPKAVESQAALREKKVSEMMNFLRSRKGETVKISEILFGTILNTLGNLFF  
SKDLCDLDYETNTSGIKHVIRKFVELGAMPNISEFYPLFDALDLQGLRKQTEIYQNRLVNI  
WSEIVKEKRQAISRSSSDFLDAMIDNGFSDLQVDILLMELISAGSDTTTSTIEWAMAELLRN  
KGAMRKLKAELASKLGENDIITESNVSELPYLAACVKETLRIHPPTPFLIPRRAPETCKIMD  
YTIPKNSKLFVNAWAIGRDSNTWEDALSFRPERFLNSNVDFRGQDFEFIPFGAGRRICPGL  
GFAEQEIQILASLIHYFEWSLPNGEDPMQIDMKEKFGVTLQKEKSLLAVPK

>SINMCH2

MKYLLNILTCVELMEYYMLPPSFLIFIPLLLFLIVKQFIPKSGNLPPGPRSWPLLGNILQIGKN  
PHISLAKFAQIHGPLISVKLGTQLVVVASSPASAAEILKTQDRLLSARSPPSVAPYELSVINQ  
HSIVFSSDLNHWKLLRAFCRTHLFSPKAVESQTALREKKVSEMIHFLKSKKGETVMISEIL  
FGTILNTFGNLFSSKDLCDLDHETKTSETKRVFRKFIELGAMPNISEFYPLLEALDLQGLSK  
QTKMYQNQLINIWSQIVKEKRQAVNRRSSDFLDVMIDSGFSDLQINILLTELISAGSDTTTS  
TIEWAMAELLRNKGAMHKLQAEELTSKIGENDIITESNISDLPYLAACVKETLRLHSPTPFLI  
PRRAPETCKIMDYTIPENSKLFFVNAWAIGRDSNTWEDALSFRPERFLNSNVDFRGQDFEFIP  
FGAGRRICPGLGFARQEIQLILASLIHYFEWSLPNGEDPMQLDMEDKFGVTIQKEKPLLIVP  
M

>LsNMCH

MTFPMVHLLLLLLLPLLLALIIAVRITTKAVDVQQGNQKLPPGPYSWPIIGNLPHMLKGPHIY  
LTQLARSYGPLCSVKLGTHLFVIGSSPMAATEIMRAHDKLPTYRWVPKAGQDGLQDYSLI  
WATQCTDHWKLLRSLCRTELFSAKGLDLQSSLREKNVDKMGVFLKSKQGSVLNVRELVF  
ASTVNILGNICFSKDFIDLDDHKKERRGLKRALYRLMKLGTTPNIADFYPRFEDPQGLKRRK  
TSEAMNEAFGAWEHIIKERRATREAQKDTDSSDEQDFLDTMLGSGFSDLQINQLTVELFSG  
GTHSTASTIEWALAEIKNKEAMFALREELKREIGFTNYIKESQVSHLPYLHACVKETLRL  
HPPAPLLHPQAILEGCEIMKYTVPKNSQLIINVWAMGRDPNLWEDPLTFKPERFCDSNVDF  
KGQDFKFLPFGVGKRMCPGYPIAIKQIHLMLASLVQNFDWFLPNNIEDLSKLDMSENFGII  
SQRKKPLMVIPKCKC

>VrNMCH1

MVAMLAEGTSFFDVFLPFLLLLPLLVFLILKLLKDSSSLKSPPLPPGPSPWPILGNLLHLGN  
MPHISLARFSQSYGPLISLRLGSQILVVASTSSAAMEILKTHDRVLSGRYVPHAVPAKNSEIN  
RMSLGWAVECNDWKNLRTVCRAELFSTKVMESQAWVGEKKVMEMVRFVSTKEGEVM  
KVGEVVFATVLNLTTLTVLMSRDFISFEDDNKDGGMKGLVRKMMMAIASPNLDDFYLIFSG  
LDLQGGQNKKTKELIARICSMWESVIRERREGASDDPSKQDFLNMLIRSGYSDDQINQLFM  
ELLTAGADTSSSTLEWAMAELIKSPESMKKVQEELAREISDNLLKASDLPHLPYLQACVKE  
TLRLHPSAPLLLPRRASVSCEVMNYTIPKDSQIWNNAWAIGRDPMNWEDPLVFKPERFLN  
SAVDKGNLLEFIPFGAGRRICPGLPMAARLLSLILASLTHFFDWSLPNGTTPDELDMNDK  
FGISLQKEQPLLIIPKVRK

>VrNMCH2

MVAMLAEGTSFFDVLLPFLLLLPLLVFLILKLLKDSSSLKSPPLPPGPSPWPILGNLLHLGN  
MPHISLARFSQSYGPLISLRLGSQILVVASTSSAAMEILKTHDRVLSGRYVPHAVPAKNSEIN  
RMSLGWAVECNDWKNLRTVCRAELFSTKVMESQAWVGEKKVMEMVRFVSTKEGEVM  
KVGEVVFATVLNLTTLTVLMSRDFISFEDDNKDGGMKGLVRKMMMAIASPNLDDFYLIFSG  
LDLQGGQNKKTKELIARICSMWESVIRERREGASDDPSKQDFLNMLIRSGYSDDQINQLFM  
ELLTAGADTSSSTLEWAMAELIKSPESMKKVHEELAREISDNLLKASDLPHLPYLQACVKE  
TLRLHPSAPLLLPRRASVSCEVMNYTIPKDSQIWNNAWAIGRDPMNWEDPLVFKPERFLN  
SAVDKGNLLEFIPFGAGRRICPGLPMAARLLPLILASLTHFFDWSLPNGTTPDELDMNDK  
FGISLQKEQPLLIIPKVRK

>QINMCH1

MDQKAIVREIDYLFFFSLLLLLATLSYLYYYKHKLKSNPPLPPGPFAWPVGNIFQMGRDLH  
SILANLARTHGPLMSLRLGTQLNIIASSPAAASEILKTHDRILSGRYVTHASPIINPKLNFSIG  
GAPECNDHWRSRLRTICKADLFSKVLESQKHIREKKVRELVSFLGSKEGEIVNLGGTVYIT  
VTNLSNVIFSMDFLDFDGNMGKELRKFIDEMAELMITPDLNLYPILGALDFQGIQKKR



DKLIEKFIAIWEDIKKRQKQESAILVHGDVLDTLIKDGHTNDQINQLIMELLMAGTVSTSI  
VIEWAMAELMKNQNVMDKLHDELERGIGTDIVKESHLAHLPLYEACVKETLRLHPLGPL  
LLPHRALQTCQVMGYTVPKNSQVLNVVWAIGRDPMIWNDPLSFKPERFLDSCLDIKGNF  
DYMPPGAGRKICPGQPLAIKQVRFILALLHSFDWFLPGNMNSTELDMNDHFSLTRKKQ  
PLQLIPKGRK

>QINMCH2

MDQKDIPLWKTDMIFFLLLFPIPLFFRYIKHVFSKNPPLPPGPFSWPIIGNIHQMGRELHSILA  
NLARVHGPLMSLRLGTQTIIVASSPAAAREILKTHDKTSLGRPLSHATPVINPTLNNFSIGFAI  
ECNDHWRRLRAICKAELFSAKALESKKMSREKKVMELIGFLGSKEGKVVNLEGVVYITV  
TDILSNALFSVDFLDFEGQGIGKELRKLLEDALGITVNLSDLYPILSGLDFQGIRKKSKEI  
LGKLITIWEDIKKERRKQESVISDQSDFLDALIKDGYTNDQINQLIVELFIAGIDTSIIAIEWG  
VANLMKNQDAMHKLRLDELDREIGTDNVKESHLAHLPLYLQACVNETLRLQPPGPLLLPHR  
ALQTCQVMGYTVPRDSQILVNMWAIGRDPMIWNDPLSFKPERFLDSSLDKGNFYEYIPFS  
AGRRIICPGQSLATMQVPFILASLVHSFDWFLPGNMNSTELDMNEKFTITLTKKQPL  
QLIPRGRK

>ZjNMCH1

MDQTLFTKMBVNYISLPSLPFHLLLLLLLLPVIFFIWKQFTSQSVNTPPGPKPWPIVGNLPQMS  
KRGHISMTHFAKIYGPLISLRLGTRLHIIASSPSSAIEILKNHDRLLSARYIPEKLTGSKPKDA  
ELSPASLMWAPSCTGHWKLLRTMCRTELFSPKAIESQTSRASKLAEMVDFVRGREGQAV  
KIKDVVFTTVFNTLSNLFFSKDLTSFEEDDYSGCKGHFRKLGEVASSLNLAEFFPILAGLDL  
QGISKKTQMHAKLLTAEWEDIVKERKENRGKNSTSQRDFLDAMIENEFADHQINQLVMEL  
FSAGTDTTTITVEWAMAELLKNREAMERVLEELRSVVGDNSESNSQLPLYEACFKET  
LRLHAPVPFLLPHCAPETCEVMNYTIPKNARILVNVWAIGRDSAFWEDPLLFKPERFIGSEL  
DFKGHNYEYLPFGAGRRIICPGLPMGIRQGQLILAYLLHCFDWSFPNGEDASAIMTEKLSL  
TLQMVKPLQLIPKWKL

>ZjNMCH2

MELMKFMSQIKHSEQINTLYLLLLLIPSFLFFILKRFTSSKFKSSPLPPGPSPWPILGNILQIG  
ERPHLDFTSFAKTYGPLISLRFGNQLVIIGSSPVAATEILKAQDRTLSGRYVPHVAPAKSLEV  
NNLSLGWTLECNEYWRNLRTICRGELFSNTAISSFACIREKKVMEMLNLLRKMQGKVVKI  
RDVTFAAVFNIVSNILVSRDLINLDDESLSGETGKLVRDIMEVASAPNISDFYPILSPFDLQG  
LRKKSNELCDRSSKMWEAIIKERKETMKNGDASTQKDFLDALMNNGCPDEQINMLLLEL  
LSAGTDTTSSAVEWILVELLRNPVCMKKVKEELAREIKQEKSIDSHLTNMPYLQACMNE  
AIRLHPPSPLLLPHRATESCQIMGYTIPKDAMVLVNFVAIGRDPHTWEDPLVFKPERFLNSS  
LDFKGNDQYIPFGAGRRIICPGLPMAAKHVSLAASLIHFFDWSLPRDMDPNLDMSEKF  
AISMVKDESLLVVPKIKI

>RcNMCH1

MDTAFSGVLGILSLSFLLLLPLIFIILNHISSPSSERRPLPPGPRQWPVGNILQVGKKPHVSL  
AYFAKLHGPLISLRLGAQIVVVAASSPIAAAEILKTHDRLLSARFISAANPYGDHVLDRLVALV  
WNPSCVFTTVFNTISNLIFSMDLSFGDQGNAGGLKTLITKLMQLATAPNIADFYPLARL  
DPQNMRRKMKIGFEKVLNAWQIYIKERRENVNDAPETDFLDVFLSTGFDDQINWLVL  
ELFAAGVDTTTTTVEWAMAELLKSRATLVKVQQELDREVDNKSIEESHVLQLQYLNACIK  
ETFRLHPPAPFLIPRRALNTCEVLNYTIPKNSQVVVNLWAIGRDSSSWEDPLSFKPERFLNS  
NIDFKGHHFQLLPFGSGRRTCPGLPMATRQLPLILAYLIRCFEWSLPNDQDPAMLDMDNKF  
GITLVKDSPLLLVPKRKL

>RcNMCH2

MEFFYSLNKRSLNIPIHLRPMQDTAKLLNQFASSFCLLLLLLLPLIFILKHIVTSLSSKRPR  
LPPGPRWPPIGNLHQIGKKLHISVTQFAKVHGPLISRLGSRVVVVGSSPLAATEILKTHDR  
LLSARTIPKVLPHYKIHVDRLAIVWASSCNERWKFLRALCRTELSANAIESQAALREKKMI  
EMVEYLSSEQQQVVNIGEVVFTSVFNTISNLIFSKDLLSFEDQERGSGLKNATWRLMELTV  
APNIADFYPPVFAGLDPQGLQKKMLKYMKEMFSAWEIHIKERRETHVHGAPTNDFLDVFL  
ANDFDDQINWLTFFELFAAGSDTTTTTVEWAMAELLKNKQFMKKACEELDREIKRNSIKE  
SDIPQLHFLNACVKETMRFHPPVPFLVHRALETCEVMNYTIPKDAQVLVNIWAIGRDPSA  
WEDPLSFDPNRFLGSNIDFKGHDFELIPFGSGRRNCVGGQSMATRQLHLILGSLMHFFDWSL  
PNGEDSVNLDLSEKFGLTLQKEQPLLLVPRKRL

>PtNMCH1

MLVQRFSIPKLIEDRIIDNEGSLDLQGLSRKTNECGSRIQELWRSIIKERREGRNDTGDDDN  
SSKRKDFLDVLLDGEFSDEQISSFFVELLAASDSSSSTIEWAMAELMRNPQAMKQLREEL  
AGETPEDLITESSLAKFPYLHLCVKETLRLHPPAPLLIPHRATEDCQVLDCTIPKDTQVLVN  
VWAIARDPASWEDPLCFKPERFLNSLDYKGNHFEFLPFGSGRRICAGLPMVKKVQLAL  
ANLIHGFDWSLPNNMLPDELDMAEKYGITLMKEQPLKLIPKLRK

>PtNMCH2

MVSISVLANSYSPFMLFLAILLLLSFVLKHKSSKVPPIPPGPKSWPIIGNVLQMGNKPHIS  
LTKLAQVYGPLMSLRLGTQLVVVGSSREAASEILKTHDRELSGRCVPHASFAKDPKLNED  
SIAWTFECTDRWRFFRSLMRNELFSSKVVDGQSRTRETKAREMIDFLKKKEGEGVKIRDIV  
FVYTFNALANIYLSKDLVDYDQIGECQRVCGLVREMMELHTTLNISDLYPILGSLDLQGV  
RKCNECESRIQELWGSVIKERREGRNDTGDDDDNSSKRKDFLDVLDGEFSDEQISLFFVE  
LLAAVSDSTSSTVDWAMAELMRNPQAMKQLREELAGETPEDLITESSLAKFPYLHFCVKE  
TLRLHPPAPFLIPHRATEDCQVLDCTIPKDTQVLNVWAIARDPASWEDPLCFKPERFLNSD  
LDYKGNHFEFLPFGSGRRICAGLPMVKKVQLALANLIHGFDWSLPNNMLPDELDMAEK  
YGITLMKEQPLKLIPKLRK

>CsNMCH1

MLTPTLYFKEMLIPSFILLSLLLLLPPIFIILKRIKSPSSKKLPLPPGPNPWPILGNLLQIGQN  
AHISITQFANIYGPLISFKLGAQRLVVAASPAAATAVLKTQDHLLSARYIFQITPDRAHLDQH  
SLVFSSECGDVWKKLRSICKVNLFTAIAIESQAILREKKMKELVEFVESKQGSVVEIKDFV  
FTSAFNILSNLIFSMDLLDFVGDFNGIKGPFKKMMDLGLTPNLADFYPLRRFDLQGLIR  
KTVIYKNEVNSVWGILIKERREIRCEKGSASNDFLDVLIQSGFSDQQIDALIIELLFAATDTT  
TTTTVEWAMSEILKDKDILNKAREEIKKVAKESPAIDESNISKLQYLWSCVKETLRLHPPVPF  
LLPRLAPMDCEVMGYISPKDSMIFVNVWGIGRDPISWEDSQTENPERFDVGCNNVDFKG  
YDYRYLPFGGGRRICPGLPMAIVQVPLILATLLHNFEWSLPNGEDLSKLDLNGRLGVTLQ  
KYETLKLIPKRRLV

>CsNMCH2

MLIPSFILLSLLLLLPIFIILKHIKSPSSKKLPLPPGPNPWPILGNLLQIGQNAHISITQFANIYG  
PLISLKLGAQRLIVASSPAAATAVLKTQDRLLSARYIFQMTPDRAHLDQHSLVFSPECGDQ  
WKNLRLSLCKVNLFTAIAIESQAILREKKMKELVKFLESKQGSVVEVKDFVFTSVFNTLSN  
LIFSMDLLDFVGDFKGIKGPFFKKMMDLGLTPNLADFYPLRRFDLQGLKNKADIYKNEV  
DSLWGILIKERREIHCQQGSASNDFLDVLIQSGFDDQQINALIIELLSAGTDTTTTTVEWAM  
SEILKDKDILNKVREEMKKVTKENRPIDESNISELQYLWRCVKETLRLHPPAPFLPRLAP  
MDCEVMGYISPKDSMVFNVWGIGRDPVWEDSQTENPQRFDVGCNDNVDFKGYDY

RYIFAIWWRKKNLPWSSNGHCASSFDFSHINSQL

>CcNMCH1

MSFSLFLMSSFVLFTIRTYLKSEKGLPPGPRPWPIIGNLHQVGKNPHVSTAILAEKHGSLISL  
RLGTQLLVVASSPEAATGILKTQDRFLSSRFIPNAFQSYLLPFALIWSADCDENWKSRLTLC  
KTHMFSTKALESQSSLRERKLGEMLDFLCSKKDEVVNIEEVVFTTMFNTLSNILFGKDFLD  
LRDRDGSASGLKEKLFKILANGLAPNVSDFFPMLDRWDLQGIKKEQLKHMKEIFSSWEDI  
NDRRLMVVVKEEEQCFLDQLLENGFSNDQINILALELFTASTDTTSTIEWAMAELIKNKK  
AMFKLQEEIRNEIHSDTIFECESKLSYLNACVKETLRLHPPTPFLPHRAIQTCEVMNYTIP  
RGSQVLVNIWAIGRNPKYWEDPLSFKPERFLNSKLDKQDFEFLPFGAGRRMCPGLFMG  
INGVQSVLTYLILRFDWILPNDEDPLKIDMNEKFGVTLQKEKPLQLSFKHLK

>CcNMCH2

MDITSFLVHNNLSAPLFVLSTIFFLLLVVRLAKPTPSKNLPPGPPRLPIIGNLHQVGDRPHVS  
TAKFANEYGPLISLRLGKQLLVVASSPDAXMEILKTQDRFLSSRVVPTAFQQASLIPHSLIW  
SECNHTWKNLRTLCTEMFSAKALESQSRLRDEKLGRLLDFLHGKQGQVINVEDVVFTTL  
FNTLSSIIFARDFXDLKDERGSRDGLKESLHKIIEYGGIHKDLGSFFPIFERFDLQGIRKGTMK  
QYXKTFAYWEDIVEERRALIXSSTWSSEQAQSFLDRLLENGFSNNQINQLVTELFVAGTNT  
THTSVVWALTEFVRHKEVMSKIVDEIKREINSNKITDSQLSNLPYLQASIKEAMRLHPPVPL  
LLPHMAAETCEVMNYTIPKNSKIFVNLWAMGRDPKVWDDPLSFKPERFMDSKLDLKGQD  
FELLPFGSGRRMCPGMPSGIKSVQLVLASLIHEFDLILPNDVDPMKLMNDKFGIALKMEE  
PLKLIFKQKREPQXA

>BsCYP80A1

MDYIVGFVVISLVALLYFLLFKPKHTNLPPSPPAWPIVGHLPDLISKNSPPFLDYMSNIAQKY  
GPLIHLKFGHLSSIFASTKEAAMEVLQTNDKVLSGRQPLPCFRIKPHIDYSILWSDSNSYWK  
KGRKILHTEIFSQKMLQAQEKNRERVAGNLVNFIMTKVGDVVELRSWLFGCALNVLGHV  
VFSKDVFEYSDQSDEVGMDKLIHGMLMTGGDFDVASYFPVLARFDLHGLKRKMDEQFK  
LLIKIWEGEVLARRANRNPEPKDMLDVLIANDFNEHQINAMFMETFGPGSDTNSNIIEWAL  
AQLIKNPDKLAKLREELDRVVGRSSTVKESHFSELPYLQACVKETMRLYPPISIMIPHRM  
ETCQVMGYTIPKGM DVHNAHAIGRDPKDWKDPLKFQPERFLDSDIEYNGKQFQFIPFGS  
GRRICPGRPLAVRIIPLVLASLVHAFGWELPDGVPNEKLDMEELFTLSLCMAKPLRVIPKVR  
I

>AtCYP82C2

MDTSLFSLFVPILVFVFIALFKKSKKPKHVKAAPSGAWPIIHLHLHLLSGKEQLLYRTLGM  
ADQYGPAMSLRLGSSETFVVSSEFAKDCFTVNDKALASRPITAAAKHMGYDCAVFGFAP  
YSAFWREMRKIATLELLSNRRLQMLKHVRVSEISMVMQDLYSLWVKKGGSEPVMVDLKS  
WLEDMSLNNMMVRMVAGKRYFGGGSLSPEDAEEARQCRKGVANFFHLVGIFTVSDAFPKL  
GWFDQFQHEKEMKQTGRELDVILERWIENHRQQRKVSQTKHNDSDFVDVMLSLAEQ GK  
FSLHQHDAITSIKSTCLALILGGSETSPSTLTWASISLLNNDMLKKAQDEIDIHVGRDRNV  
EDSDIENLVYIQAIKETLRLYPAGPLLGHREAIEDCTVAGYNVRRGTRMLNVNWKIQRDP  
RVYMEPNEFRPERFITGEAKEFDVRGQNFELMPFGSGRRSCPGSSLAMQVLHLGLARFLQ  
SFDVKTVMDMPVDMTESPGLTIPKATPLEILISPRLEGLYV

>PsCYP82X1

MELFIKLPFIQPIPFISIILVTTVSIVLLYSVFFWVTDKKKKKRKKAPNAAGAWPLIGHLRLLM  
NDKEPLYRALGSMADKYGPAFNIRLGNQEVLVVSNWEMVKQCFGNQNDKLFSNRQTTL  
AAKYMLNQTTSSGFAPYGPYWRELKIMVQQLSKQSLESWKHLKIKEMDASFSLNEL

CNNNGTGTATLIRMDEWFAELTFNVIARNVFGYQSGGRSTALTNGDTESKGERYKKTLEE  
ALHLSIFAVSDIFPSLEWVDRLRGLIRNMKRFGDELNSIAGCLIEEHRQKRLQSVSKSDK  
GVGDEQDFVDVLLSVAEKSQLPGDDPDLVIKSMILEIVSGGSETTSSTLTWALCLLNHPH  
VLKKAKEELDTHVGKDRHVEESDTPKLVYINAIKESMRLYPNGAMLDRLALEECEVGGF  
HVPAGGRLFVNVWQIQRDPSVWENPLEFKPERWFLSNGEKMDVDYKGHNHEFIPFGIGR  
RMCAGMLWASEVIHLVLPRLIHGFDMDKAASANGKVDMAEMAGMVICFKKTPLEVMVNP  
RE

>PsCYP82X2

MKSLMMNKLLFLQRITDSPSTTIISTFIVTIISIVFLYTVLLIRTTKNKQKIAAPKASGAWPFI  
GHLKLFMKQDTQFYRTLGTMSDKYGSVFTLRLGNQAILVVSNNWEMVKECFTTNDKSFSN  
RPSTLSTKYMLNDTNSVVFSPYGTYWREMRKILVQKLLISNQRSEALKNLKTKEIDNSFV  
KLNDLCNNDVSGGGTKVRMDEWLADMMFNIIARITFGYQSGGGDAPGASTTSKNVERY  
KKTLDDEMFFVLATRFVSDIFPSLEFIDRLRGLVKDMKILGDELNSIAGCFIEEHRQKRRES  
LSSLLSLSNESVGDEQDFIDVLLSIMDQSRLPGDDPDFIIKIMILEAFAGGTDLSATLTWVL  
SLLLNHPNVLKRAREEIDRHVENGGKQVEVSDIPKLGIDAIKETMRLYPVGALSERYTTE  
ECEVGRFNVFAGTRLLVNIWQIHRDPSVWENPSDFQPERFLCSDKVGVDLYGQNYELIPFG  
AGRRVCPAIVSSLQTMHYALARLIQGYEMKSASLDGKVNMEEMIAMSCHKMSPLEVIISP  
REPRRS
