# Supplementary material for: Transcriptome and Metabolome Analysis of Isoquinoline Alkaloid Biosynthesis of Coptis chinensis in Different Years
Source: MDPI journal article supplement (doi:10.3390/genes14122232), 2023-12-18

Supplementary Table S1 Samples sequencing data evaluation

| Sample | Raw Reads | Clean Reads | Clean<br>Base(G) | Q20(%) | Q30(%) | GC Content(%) |
|--------|-----------|-------------|------------------|--------|--------|---------------|
| Cch2-1 | 43219666  | 41432808    | 6.21             | 97.63  | 93.16  | 42.72         |
| Cch2-2 | 46668210  | 44663620    | 6.7              | 97.63  | 93.14  | 42.35         |
| Cch2-3 | 47915720  | 45880232    | 6.88             | 97.67  | 93.25  | 42.7          |
| Cch4-1 | 48929294  | 46932992    | 7.04             | 97.67  | 93.24  | 42.6          |
| Cch4-2 | 63273278  | 61381392    | 9.21             | 98.16  | 94.37  | 42.5          |
| Cch4-3 | 42272492  | 40405586    | 6.06             | 97.67  | 93.26  | 42.59         |

Note: Cch2: 2-year *Coptis. chinensis*, Cch4: 4-year *Coptis. chinensis*

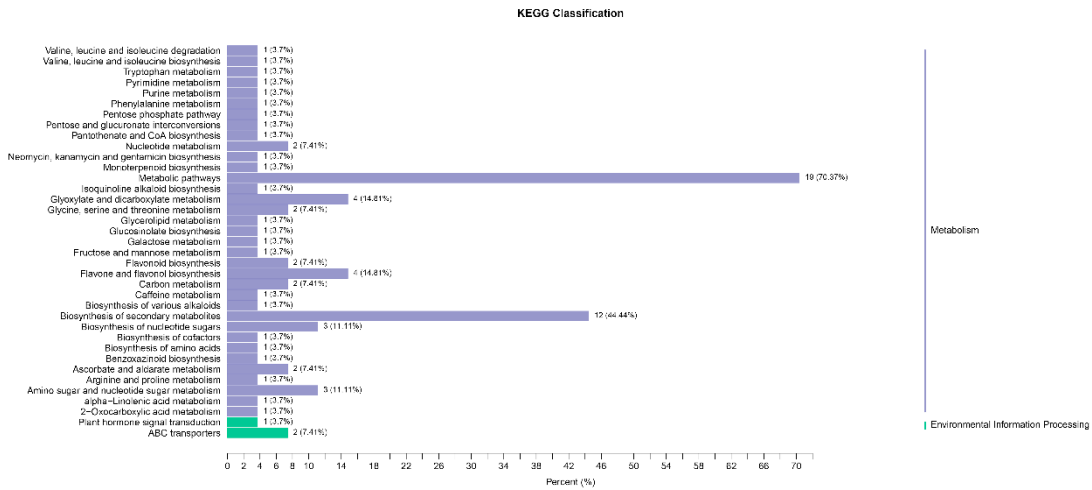

Figure S1 Annotation of differentially metabolites in *C. chinensis* in KEGG

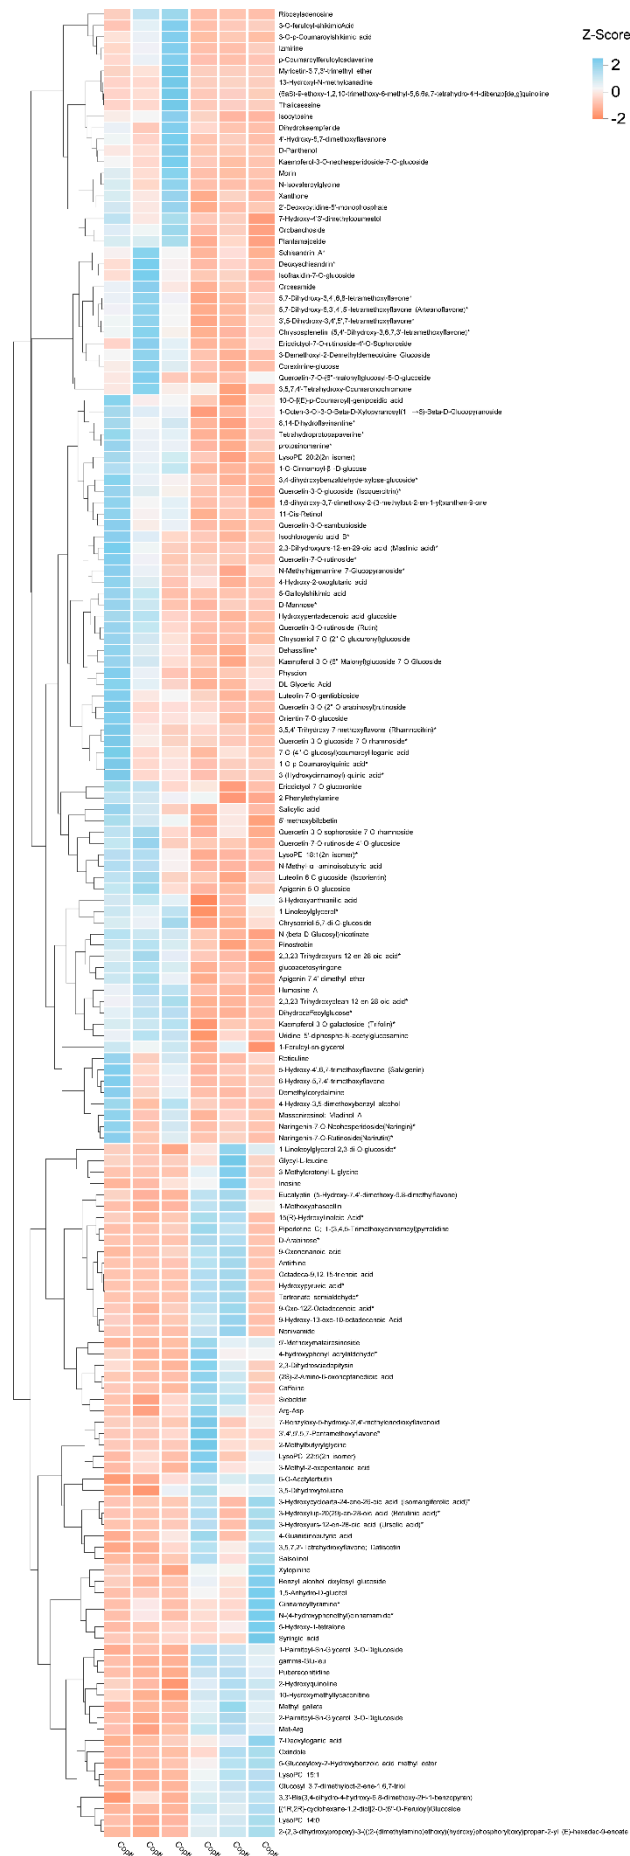

Supplement: s1 [file s1]
