# Supplementary material for: Transcriptome and Metabolome Analysis of Isoquinoline Alkaloid Biosynthesis of Coptis chinensis in Different Years
Source: Genes (Basel). 2023 Dec 18;14(12):2232. doi: 10.3390/genes14122232 (PMC10742649; doi:10.3390/genes14122232)
Supplement: Supplementary file 1 [file genes-14-02232-s001.zip]

Archive with 8 entries (8 files):
- Supplementary Figures Table S1.pdf
- Supplementary Table S2 Function annotation of C. chinensis genes.xlsx
- Supplementary Table S3 Genes annotation in NR.xlsx
- Supplementary Table S4 Genes annotation in KOG.xlsx
- Supplementary Table S5 Genes annotation in GO.xlsx
- Supplementary Table S6 Genes annotation in KEGG.xlsx
- Supplementary Table S7 DEGs between 2−year  and 4−year C.chinensis rhizomes.xlsx
- Supplementary Table S8 Reference sequences for different species.pdf
