# Supplementary material for: Transcriptome and Metabolome Analysis of Isoquinoline Alkaloid Biosynthesis of Coptis chinensis in Different Years
Source: Genes (Basel). 2023 Dec 18;14(12):2232. doi: 10.3390/genes14122232 (PMC10742649; doi:10.3390/genes14122232)
Supplement: Supplementary file 1 [file genes-14-02232-s001.zip › Supplementary Table S2 Function annotation of C. chinensis genes.xlsx]

## Sheet: Sheet1
Supplementary Table 3 Function annotation of C. chinensis genes
ID	KEGG	KEGG pathway	NR	Swissprot	Tremble	KOG	GO	Pfam
IFM89_033633	K19747 BAHD acyltransferase [EC:2.3.1.-] | (RefSeq) BAHD acyltransferase DCR (A)	--	hypothetical protein IFM89_033633 [Coptis chinensis]	Y3028_ARATH RecName: Full=Uncharacterized acetyltransferase At3g50280; EC=2.3.1.-;	A0A835HQE1_9MAGN SubName: Full=Uncharacterized protein {ECO:0000313|EMBL:KAF9603006.1};	--	GO:0016746,acyltransferase activity; GO:0003674,molecular_function; GO:0003824,catalytic activity; GO:0016740,transferase activity	PF02458.18:Transferase family
IFM89_016960	K14485 transport inhibitor response 1 | (RefSeq) protein TRANSPORT INHIBITOR RESPONSE 1-like (A)	ko04075: Plant hormone signal transduction	hypothetical protein IFM89_016960 [Coptis chinensis]	TIR1_ARATH RecName: Full=Protein TRANSPORT INHIBITOR RESPONSE 1; AltName: Full=Weak ethylene-insensitive protein 1;	A0A835HY01_9MAGN RecName: Full=F-box domain-containing protein {ECO:0000259|SMART:SM00256};	Leucine rich repeat proteins, some proteins contain F-box	GO:0005634,nucleus; GO:0019005,SCF ubiquitin ligase complex; GO:0010011,auxin binding; GO:0038198,auxin receptor activity; GO:0000822,inositol hexakisphosphate binding; GO:0004842,ubiquitin-protein transferase activity; GO:0009734,auxin-activated signaling pathway; GO:0007049,cell cycle; GO:0016036,cellular response to phosphate starvation; GO:0006952,defense response; GO:0009873,ethylene-activat…	PF18791.4:Transport inhibitor response 1 protein domain
IFM89_034423	K07735 putative transcriptional regulator | (RefSeq) uncharacterized protein LOC111200446 (A)	--	hypothetical protein IFM89_034423 [Coptis chinensis]	--	A0A835IZY2_9MAGN SubName: Full=Uncharacterized protein {ECO:0000313|EMBL:KAF9626489.1};	--	--	PF02622.18:Uncharacterized ACR, COG1678
IFM89_032556	K17592 sacsin | (RefSeq) sacsin-like (A)	--	hypothetical protein IFM89_032556 [Coptis chinensis]	--	A0A835I2P0_9MAGN SubName: Full=Uncharacterized protein {ECO:0000313|EMBL:KAF9611510.1};	--	--	PF12609.11:Wound-induced protein
novel.7566	--	--	hypothetical protein IFM89_017630 [Coptis chinensis]	--	A0A835GXZ6_9MAGN SubName: Full=Uncharacterized protein {ECO:0000313|EMBL:KAF9588951.1};	--	GO:0004252,serine-type endopeptidase activity; GO:0006508,proteolysis; GO:0003674,molecular_function; GO:0003824,catalytic activity; GO:0004175,endopeptidase activity; GO:0008233,peptidase activity; GO:0008236,serine-type peptidase activity; GO:0016787,hydrolase activity; GO:0017171,serine hydrolase activity; GO:0140096,catalytic activity, acting on a protein; GO:0006807,nitrogen compound metabol…	--
IFM89_011601	K22683 aspartyl protease family protein [EC:3.4.23.-] | (RefSeq) protein ASPARTIC PROTEASE IN GUARD CELL 1-like (A)	--	hypothetical protein IFM89_011601 [Coptis chinensis]	ASPG1_ARATH RecName: Full=Protein ASPARTIC PROTEASE IN GUARD CELL 1; Short=AtASPG1; EC=3.4.23.-; Flags: Precursor;	A0A835H7K5_9MAGN RecName: Full=Peptidase A1 domain-containing protein {ECO:0000259|PROSITE:PS51767};	Aspartyl protease	GO:0005783,endoplasmic reticulum; GO:0004190,aspartic-type endopeptidase activity; GO:0070001,aspartic-type peptidase activity; GO:0003677,DNA binding; GO:0006508,proteolysis; GO:0009737,response to abscisic acid; GO:0009414,response to water deprivation; GO:0009627,systemic acquired resistance; GO:0003674,molecular_function; GO:0003824,catalytic activity; GO:0004175,endopeptidase activity; GO:00…	PF14543.9:Xylanase inhibitor N-terminal
IFM89_016693	--	--	hypothetical protein IFM89_016693 [Coptis chinensis]	DAD2_PETHY RecName: Full=Probable strigolactone esterase DAD2; EC=3.1.-.-; AltName: Full=Protein DECREASED APICAL DOMINANCE 2;	A0A835IPM8_9MAGN RecName: Full=AB hydrolase-1 domain-containing protein {ECO:0000259|Pfam:PF12697};	--	GO:0016788,hydrolase activity, acting on ester bonds; GO:0010223,secondary shoot formation; GO:1901601,strigolactone biosynthetic process; GO:0003674,molecular_function; GO:0003824,catalytic activity; GO:0016787,hydrolase activity; GO:0001763,morphogenesis of a branching structure; GO:0007275,multicellular organism development; GO:0008150,biological_process; GO:0009653,anatomical structure morpho…	PF12697.10:Alpha/beta hydrolase family
IFM89_029507	--	--	hypothetical protein IFM89_029507 [Coptis chinensis]	--	A0A835LSV4_9MAGN SubName: Full=Uncharacterized protein {ECO:0000313|EMBL:KAF9606908.1};	--	GO:0016021,integral component of membrane; GO:0005575,cellular_component; GO:0016020,membrane; GO:0031224,intrinsic component of membrane; GO:0110165,cellular anatomical entity	PF19745.2:Alpha-(1,6)-fucosyltransferase N- and catalytic domains
IFM89_028660	K00457 4-hydroxyphenylpyruvate dioxygenase [EC:1.13.11.27] | (RefSeq) 4-hydroxyphenylpyruvate dioxygenase (A)	ko00130: Ubiquinone and other terpenoid-quinone biosynthesis; ko00350: Tyrosine metabolism; ko00360: Phenylalanine metabolism; ko01100: Metabolic pathways; ko01240: Biosynthesis of cofactors	hypothetical protein IFM89_028660 [Coptis chinensis]	HPPD_ARATH RecName: Full=4-hydroxyphenylpyruvate dioxygenase; EC=1.13.11.27 {ECO:0000269|PubMed:15301540}; AltName: Full=4-hydroxyphenylpyruvic acid oxidase; Short=4HPPD; Short=HPD; Short=HPPDase;	A0A835LJM8_9MAGN RecName: Full=4-hydroxyphenylpyruvate dioxygenase {ECO:0000256|PIRNR:PIRNR009283};	4-hydroxyphenylpyruvate dioxygenase	GO:0005737,cytoplasm; GO:0003868,4-hydroxyphenylpyruvate dioxygenase activity; GO:0042802,identical protein binding; GO:0005506,iron ion binding; GO:0006559,L-phenylalanine catabolic process; GO:0006572,tyrosine catabolic process; GO:0003674,molecular_function; GO:0003824,catalytic activity; GO:0016491,oxidoreductase activity; GO:0016701,oxidoreductase activity, acting on single donors with incor…	PF00903.28:Glyoxalase/Bleomycin resistance protein/Dioxygenase superfamily
IFM89_004116	K03294 basic amino acid/polyamine antiporter, APA family | (RefSeq) cationic amino acid transporter 1 isoform X1 (A)	--	hypothetical protein IFM89_004116, partial [Coptis chinensis]	CAAT7_ARATH RecName: Full=Cationic amino acid transporter 7, chloroplastic; Flags: Precursor;	A0A835H6D1_9MAGN RecName: Full=AA_permease_C domain-containing protein {ECO:0000259|Pfam:PF13906};	Amino acid transporters	GO:0031969,chloroplast membrane; GO:0016021,integral component of membrane; GO:0005886,plasma membrane; GO:0015171,amino acid transmembrane transporter activity; GO:0006865,amino acid transport; GO:0003674,molecular_function; GO:0005215,transporter activity; GO:0005342,organic acid transmembrane transporter activity; GO:0022857,transmembrane transporter activity; GO:0046943,carboxylic acid transm…	PF13520.9:Amino acid permease
IFM89_016791	--	--	hypothetical protein IFM89_016791 [Coptis chinensis]	FLZ2_ARATH RecName: Full=FCS-Like Zinc finger 2 {ECO:0000303|PubMed:24901469};	A0A835MIH7_9MAGN RecName: Full=FLZ-type domain-containing protein {ECO:0000259|PROSITE:PS51795};	--	GO:0019900,kinase binding; GO:0046872,metal ion binding; GO:0009749,response to glucose; GO:1905582,response to mannose; GO:0042594,response to starvation; GO:0009744,response to sucrose; GO:0003674,molecular_function; GO:0005488,binding; GO:0005515,protein binding; GO:0019899,enzyme binding; GO:0043167,ion binding; GO:0043169,cation binding; GO:0008150,biological_process; GO:0009743,response to …	PF04570.17:zinc-finger of the FCS-type, C2-C2
IFM89_018130	K07213 copper chaperone | (GenBank) copper chaperone (A)	--	hypothetical protein IFM89_018130 [Coptis chinensis]	HIP36_ARATH RecName: Full=Heavy metal-associated isoprenylated plant protein 36 {ECO:0000303|PubMed:21072340, ECO:0000303|PubMed:23368984}; Short=AtHIP36 {ECO:0000303|PubMed:21072340, ECO:0000303|PubMed:23368984}; Flags: Precursor;	A0A835HVX9_9MAGN RecName: Full=HMA domain-containing protein {ECO:0000259|PROSITE:PS50846};	Copper chaperone	GO:0046872,metal ion binding; GO:0003674,molecular_function; GO:0005488,binding; GO:0043167,ion binding; GO:0043169,cation binding	PF00403.29:Heavy-metal-associated domain
IFM89_034725	K15015 solute carrier family 32 (vesicular inhibitory amino acid transporter) | (RefSeq) vacuolar amino acid transporter 1 (A)	--	hypothetical protein IFM89_034725 [Coptis chinensis]	AVT1C_ARATH RecName: Full=Amino acid transporter AVT1C {ECO:0000305}; Short=AtAvt1C {ECO:0000303|PubMed:27925655};	A0A835LJH0_9MAGN RecName: Full=Aa_trans domain-containing protein {ECO:0000259|Pfam:PF01490};	Amino acid transporters	GO:0016021,integral component of membrane; GO:0016020,membrane; GO:0000325,plant-type vacuole; GO:0015171,amino acid transmembrane transporter activity; GO:0003333,amino acid transmembrane transport; GO:0003674,molecular_function; GO:0005215,transporter activity; GO:0005342,organic acid transmembrane transporter activity; GO:0022857,transmembrane transporter activity; GO:0046943,carboxylic acid t…	PF01490.21:Transmembrane amino acid transporter protein
IFM89_016713	K07025 putative hydrolase of the HAD superfamily | (RefSeq) uncharacterized protein LOC114292903 (A)	--	hypothetical protein IFM89_016713 [Coptis chinensis]	LBD39_ARATH RecName: Full=LOB domain-containing protein 39; AltName: Full=ASYMMETRIC LEAVES 2-like protein 41; Short=AS2-like protein 41;	A0A835MBS3_9MAGN RecName: Full=LOB domain-containing protein {ECO:0000259|PROSITE:PS50891};	--	GO:0010468,regulation of gene expression; GO:0008150,biological_process; GO:0008152,metabolic process; GO:0010467,gene expression; GO:0019222,regulation of metabolic process; GO:0043170,macromolecule metabolic process; GO:0050789,regulation of biological process; GO:0060255,regulation of macromolecule metabolic process; GO:0065007,biological regulation; GO:0071704,organic substance metabolic proc…	PF03195.17:Lateral organ boundaries (LOB) domain
IFM89_005173	K12761 carbon catabolite-derepressing protein kinase [EC:2.7.11.1] | (RefSeq) CBL-interacting serine/threonine-protein kinase 7-like (A)	--	hypothetical protein IFM89_005173 [Coptis chinensis]	--	A0A835IL23_9MAGN SubName: Full=Uncharacterized protein {ECO:0000313|EMBL:KAF9619159.1};	--	--	PF14009.9:PADRE domain
IFM89_021695	--	--	Oberon-like protein [Thalictrum thalictroides]	OBE3_ARATH RecName: Full=Protein OBERON 3 {ECO:0000305}; AltName: Full=Protein TITANIA 1 {ECO:0000303|PubMed:22378640}; AltName: Full=Protein WUS ENHANCER 9 {ECO:0000303|PubMed:27196372};	A0A7J6UWK6_THATH SubName: Full=Oberon-like protein {ECO:0000313|EMBL:KAF5176987.1};	--	GO:0005634,nucleus; GO:0046872,metal ion binding; GO:0001708,cell fate specification; GO:0090421,embryonic meristem initiation; GO:0009880,embryonic pattern specification; GO:0055065,metal ion homeostasis; GO:0003674,molecular_function; GO:0005488,binding; GO:0043167,ion binding; GO:0043169,cation binding; GO:0008150,biological_process; GO:0009987,cellular process; GO:0030154,cell differentiation…	PF16312.8:Coiled-coil region of Oberon
IFM89_025626	K09422 transcription factor MYB, plant | (RefSeq) transcription factor MYB108 (A)	--	hypothetical protein IFM89_025626 [Coptis chinensis]	MYB62_ARATH RecName: Full=Transcription factor MYB62 {ECO:0000303|PubMed:9839469}; AltName: Full=Myb-related protein 62 {ECO:0000303|PubMed:9839469}; Short=AtMYB62 {ECO:0000303|PubMed:9839469};	A0A835H715_9MAGN SubName: Full=Uncharacterized protein {ECO:0000313|EMBL:KAF9593841.1};	Transcription factor, Myb superfamily	GO:0005634,nucleus; GO:0003700,DNA-binding transcription factor activity; GO:0043565,sequence-specific DNA binding; GO:0016036,cellular response to phosphate starvation; GO:0009740,gibberellic acid mediated signaling pathway; GO:0009686,gibberellin biosynthetic process; GO:0010373,negative regulation of gibberellin biosynthetic process; GO:0045892,negative regulation of DNA-templated transcriptio…	PF00249.34:Myb-like DNA-binding domain
IFM89_038438	K03875 F-box and leucine-rich repeat protein 1 (S-phase kinase-associated protein 2) | (RefSeq) F-box protein SKP2A-like (A)	ko04120: Ubiquitin mediated proteolysis	hypothetical protein IFM89_038438 [Coptis chinensis]	SKP2A_ARATH RecName: Full=F-box protein SKP2A; AltName: Full=FBL5-like protein; Short=AtFBL5; AltName: Full=SKP2-like protein 1; Short=AtSKP2;1;	A0A835I5X0_9MAGN RecName: Full=F-box domain-containing protein {ECO:0000259|Pfam:PF00646};	Leucine rich repeat proteins, some proteins contain F-box	GO:0005634,nucleus; GO:0019005,SCF ubiquitin ligase complex; GO:0004842,ubiquitin-protein transferase activity; GO:0009734,auxin-activated signaling pathway; GO:0071365,cellular response to auxin stimulus; GO:0010311,lateral root formation; GO:0051781,positive regulation of cell division; GO:0016567,protein ubiquitination; GO:0031146,SCF-dependent proteasomal ubiquitin-dependent protein catabolic…	PF13516.9:Leucine Rich repeat
IFM89_014288	K22418 11beta/17beta-hydroxysteroid dehydrogenase [EC:1.1.1.146 1.1.1.-] | (RefSeq) 11-beta-hydroxysteroid dehydrogenase 1A-like (A)	--	hypothetical protein IFM89_014288 [Coptis chinensis]	HSDA_ARAHY RecName: Full=11-beta-hydroxysteroid dehydrogenase A {ECO:0000305}; EC=1.1.1.146 {ECO:0000250|UniProtKB:Q93W57}; AltName: Full=17-beta-hydroxysteroid dehydrogenase A {ECO:0000305}; EC=1.1.1.- {ECO:0000250|UniProtKB:Q93W57}; AltName: Full=Steroleosin-A {ECO:0000303|PubMed:25860789, ECO:0000312|EMBL:ABS28874.1, ECO:0000312|EMBL:ABX38844.1};	A0A835HSN2_9MAGN SubName: Full=Uncharacterized protein {ECO:0000313|EMBL:KAF9605175.1};	Predicted dehydrogenase	GO:0016021,integral component of membrane; GO:0005811,lipid droplet; GO:0070524,11-beta-hydroxysteroid dehydrogenase (NADP+) activity; GO:0102196,cortisol dehydrogenase activity; GO:0003674,molecular_function; GO:0003824,catalytic activity; GO:0003845,11-beta-hydroxysteroid dehydrogenase [NAD(P)] activity; GO:0016229,steroid dehydrogenase activity; GO:0016491,oxidoreductase activity; GO:0016614,o…	PF00106.28:short chain dehydrogenase
novel.3090	--	--	hypothetical protein AQUCO_01300562v1 [Aquilegia coerulea]	BASS5_ORYSI RecName: Full=Probable sodium/metabolite cotransporter BASS5, chloroplastic; AltName: Full=Bile acid-sodium symporter family protein 5; Flags: Precursor;	A0A2G5E2I0_AQUCA SubName: Full=Uncharacterized protein {ECO:0000313|EMBL:PIA49911.1};	Na+-bile acid cotransporter	GO:0009941,chloroplast envelope; GO:0016021,integral component of membrane; GO:0005575,cellular_component; GO:0005622,intracellular anatomical structure; GO:0005737,cytoplasm; GO:0009507,chloroplast; GO:0009526,plastid envelope; GO:0009536,plastid; GO:0031967,organelle envelope; GO:0031975,envelope; GO:0043226,organelle; GO:0043227,membrane-bounded organelle; GO:0043229,intracellular organelle; G…	PF01758.19:Sodium Bile acid symporter family
IFM89_013433	K01602 ribulose-bisphosphate carboxylase small chain [EC:4.1.1.39] | (RefSeq) ribulose bisphosphate carboxylase small chain, chloroplastic (A)	ko00630: Glyoxylate and dicarboxylate metabolism; ko00710: Carbon fixation in photosynthetic organisms; ko01100: Metabolic pathways; ko01110: Biosynthesis of secondary metabolites; ko01200: Carbon metabolism	hypothetical protein IFM89_013433 [Coptis chinensis]	RBS_LACSA RecName: Full=Ribulose bisphosphate carboxylase small subunit, chloroplastic {ECO:0000255|HAMAP-Rule:MF_00860}; Short=RuBisCO small subunit {ECO:0000255|HAMAP-Rule:MF_00860}; Flags: Precursor;	A0A835LII2_9MAGN RecName: Full=Ribulose bisphosphate carboxylase small subunit, chloroplastic {ECO:0000256|HAMAP-Rule:MF_00860}; Short=RuBisCO small subunit {ECO:0000256|HAMAP-Rule:MF_00860};	--	GO:0009507,chloroplast; GO:0009853,photorespiration; GO:0019253,reductive pentose-phosphate cycle; GO:0008150,biological_process; GO:0008152,metabolic process; GO:0009987,cellular process; GO:0043094,cellular metabolic compound salvage; GO:0044237,cellular metabolic process; GO:0005975,carbohydrate metabolic process; GO:0009058,biosynthetic process; GO:0015977,carbon fixation; GO:0015979,photosyn…	PF00101.23:Ribulose bisphosphate carboxylase, small chain
novel.3183	--	--	hypothetical protein AQUCO_01400570v1 [Aquilegia coerulea]	--	A0A2G5DX09_AQUCA RecName: Full=J domain-containing protein {ECO:0000259|PROSITE:PS50076};	--	--	PF00226.34:DnaJ domain
IFM89_018919	--	--	hypothetical protein IFM89_018919 [Coptis chinensis]	--	A0A835LJ35_9MAGN SubName: Full=Uncharacterized protein {ECO:0000313|EMBL:KAF9597473.1};	--	--	--
IFM89_014928	K05929 phosphoethanolamine N-methyltransferase [EC:2.1.1.103] | (RefSeq) phosphomethylethanolamine N-methyltransferase-like (A)	ko00564: Glycerophospholipid metabolism	hypothetical protein IFM89_014928 [Coptis chinensis]	PEAM2_ARATH RecName: Full=Phosphomethylethanolamine N-methyltransferase; Short=AtPMEAMT; EC=2.1.1.-; AltName: Full=Phosphoethanolamine N-methyltransferase 2;	A0A835H8H1_9MAGN RecName: Full=Methyltransf_11 domain-containing protein {ECO:0000259|Pfam:PF08241};	SAM-dependent methyltransferases	GO:0005737,cytoplasm; GO:0003729,mRNA binding; GO:0000234,phosphoethanolamine N-methyltransferase activity; GO:0052667,phosphomethylethanolamine N-methyltransferase activity; GO:0032259,methylation; GO:0006656,phosphatidylcholine biosynthetic process; GO:0003674,molecular_function; GO:0003676,nucleic acid binding; GO:0003723,RNA binding; GO:0005488,binding; GO:0097159,organic cyclic compound bind…	PF08241.15:Methyltransferase domain
IFM89_037381	K13385 N-methylcoclaurine 3'-monooxygenase [EC:1.14.14.102] | (RefSeq) (S)-N-methylcoclaurine 3'-hydroxylase isozyme 1 (A)	ko00950: Isoquinoline alkaloid biosynthesis; ko01100: Metabolic pathways; ko01110: Biosynthesis of secondary metabolites	hypothetical protein IFM89_037381 [Coptis chinensis]	C80G2_COPJA RecName: Full=Corytuberine synthase {ECO:0000312|EMBL:BAF80448.1}; EC=1.14.19.51 {ECO:0000269|PubMed:18230623}; AltName: Full=Cytochrome P450 80G2;	A0A835II91_9MAGN SubName: Full=Uncharacterized protein {ECO:0000313|EMBL:KAF9617569.1};	Cytochrome P450 CYP2 subfamily	GO:0005789,endoplasmic reticulum membrane; GO:0016021,integral component of membrane; GO:0102963,(S)-corytuberine synthase activity; GO:0020037,heme binding; GO:0005506,iron ion binding; GO:0004497,monooxygenase activity; GO:0009820,alkaloid metabolic process; GO:0019438,aromatic compound biosynthetic process; GO:1901362,organic cyclic compound biosynthetic process; GO:0003674,molecular_function;…	PF00067.25:Cytochrome P450
IFM89_002418	K19040 E3 ubiquitin-protein ligase ATL10/75/76/77/78 [EC:2.3.2.27] | (RefSeq) RING-H2 finger protein ATL78-like (A)	--	hypothetical protein IFM89_002418 [Coptis chinensis]	ATL80_ARATH RecName: Full=RING-H2 finger protein ATL80; EC=2.3.2.27 {ECO:0000305}; AltName: Full=RING-type E3 ubiquitin transferase ATL80 {ECO:0000305};	A0A835ILF9_9MAGN RecName: Full=RING-type domain-containing protein {ECO:0000259|PROSITE:PS50089};	FOG: Predicted E3 ubiquitin ligase	GO:0016021,integral component of membrane; GO:0005886,plasma membrane; GO:0046872,metal ion binding; GO:0061630,ubiquitin protein ligase activity; GO:0070417,cellular response to cold; GO:0006952,defense response; GO:0009909,regulation of flower development; GO:0010966,regulation of phosphate transport; GO:0003674,molecular_function; GO:0005488,binding; GO:0043167,ion binding; GO:0043169,cation b…	PF13639.9:Ring finger domain
IFM89_001988	K09843 (+)-abscisic acid 8'-hydroxylase [EC:1.14.14.137] | (RefSeq) abscisic acid 8'-hydroxylase 4 (A)	ko00906: Carotenoid biosynthesis; ko01110: Biosynthesis of secondary metabolites	hypothetical protein IFM89_001988 [Coptis chinensis]	ABAH1_SOLLC RecName: Full=Abscisic acid 8'-hydroxylase CYP707A1 {ECO:0000305}; Short=ABA 8'-hydroxylase CYP707A1 {ECO:0000305}; Short=SlCYP707A1 {ECO:0000303|PubMed:19322584}; EC=1.14.14.137 {ECO:0000250|UniProtKB:Q949P1}; AltName: Full=Cytochrome P450 707A1 {ECO:0000303|PubMed:19322584};	A0A835HN62_9MAGN SubName: Full=Uncharacterized protein {ECO:0000313|EMBL:KAF9599953.1};	Cytochrome P450 CYP4/CYP19/CYP26 subfamilies	GO:0016021,integral component of membrane; GO:0010295,(+)-abscisic acid 8'-hydroxylase activity; GO:0020037,heme binding; GO:0005506,iron ion binding; GO:0004497,monooxygenase activity; GO:0016491,oxidoreductase activity; GO:0046345,abscisic acid catabolic process; GO:0009856,pollination; GO:0009737,response to abscisic acid; GO:0009733,response to auxin; GO:0009414,response to water deprivation;…	PF00067.25:Cytochrome P450
IFM89_009523	K16196 eukaryotic translation initiation factor 2-alpha kinase 4 [EC:2.7.11.1] | (RefSeq) eIF-2-alpha kinase GCN2 (A)	ko04141: Protein processing in endoplasmic reticulum	hypothetical protein IFM89_009523 [Coptis chinensis]	GCN2_ARATH RecName: Full=eIF-2-alpha kinase GCN2 {ECO:0000250|UniProtKB:Q9HGN1}; AltName: Full=serine/threonine-protein kinase GCN2 {ECO:0000250|UniProtKB:P15442}; EC=2.7.11.1;	A0A835HUN7_9MAGN SubName: Full=Uncharacterized protein {ECO:0000313|EMBL:KAF9604727.1};	eIF-2alpha kinase GCN2	GO:0005829,cytosol; GO:0005524,ATP binding; GO:0004694,eukaryotic translation initiation factor 2alpha kinase activity; GO:0004672,protein kinase activity; GO:0106310,protein serine kinase activity; GO:0000049,tRNA binding; GO:0034198,cellular response to amino acid starvation; GO:0072755,cellular response to benomyl; GO:0070301,cellular response to hydrogen peroxide; GO:1990451,cellular stress r…	--
IFM89_016965	K01177 beta-amylase [EC:3.2.1.2] | (RefSeq) hypothetical protein (A)	ko00500: Starch and sucrose metabolism; ko01100: Metabolic pathways; ko01110: Biosynthesis of secondary metabolites	hypothetical protein IFM89_016965 [Coptis chinensis]	BAM9_ARATH RecName: Full=Inactive beta-amylase 9; AltName: Full=1,4-alpha-D-glucan maltohydrolase; AltName: Full=Inactive beta-amylase 3;	A0A835HW20_9MAGN RecName: Full=Beta-amylase {ECO:0000256|RuleBase:RU000509}; EC=3.2.1.2 {ECO:0000256|RuleBase:RU000509};	--	GO:0005737,cytoplasm; GO:0016161,beta-amylase activity; GO:0000272,polysaccharide catabolic process; GO:0003674,molecular_function; GO:0003824,catalytic activity; GO:0004553,hydrolase activity, hydrolyzing O-glycosyl compounds; GO:0016160,amylase activity; GO:0016787,hydrolase activity; GO:0016798,hydrolase activity, acting on glycosyl bonds; GO:0005975,carbohydrate metabolic process; GO:0005976,…	PF01373.20:Glycosyl hydrolase family 14
IFM89_029031	K02068 UDP-glucose/iron transport system ATP-binding protein | (RefSeq) ABC transporter I family member 17-like (A)	--	hypothetical protein IFM89_029031 [Coptis chinensis]	AB17I_ARATH RecName: Full=ABC transporter I family member 17; Short=ABC transporter ABCI.17; Short=AtABCI17; AltName: Full=MRP-related protein 1; AltName: Full=Non-intrinsic ABC protein 3;	A0A835M261_9MAGN RecName: Full=ABC transporter domain-containing protein {ECO:0000259|PROSITE:PS50893};	Multidrug/pheromone exporter, ABC superfamily	GO:0000325,plant-type vacuole; GO:0005886,plasma membrane; GO:0005524,ATP binding; GO:0005315,inorganic phosphate transmembrane transporter activity; GO:0035435,phosphate ion transmembrane transport; GO:0000166,nucleotide binding; GO:0003674,molecular_function; GO:0005488,binding; GO:0017076,purine nucleotide binding; GO:0030554,adenyl nucleotide binding; GO:0032553,ribonucleotide binding; GO:003…	PF00005.30:ABC transporter
IFM89_010499	K19891 glucan endo-1,3-beta-glucosidase 1/2/3 [EC:3.2.1.39] | (RefSeq) hypothetical protein (A)	ko00500: Starch and sucrose metabolism; ko01100: Metabolic pathways	hypothetical protein IFM89_010499 [Coptis chinensis]	E1312_ARATH RecName: Full=Glucan endo-1,3-beta-glucosidase 12; EC=3.2.1.39; AltName: Full=(1->3)-beta-glucan endohydrolase 12; Short=(1->3)-beta-glucanase 12; AltName: Full=Beta-1,3-endoglucanase 12; Short=Beta-1,3-glucanase 12; Flags: Precursor;	A0A835LAS5_9MAGN RecName: Full=X8 domain-containing protein {ECO:0000259|SMART:SM00768};	--	GO:0031225,anchored component of membrane; GO:0046658,anchored component of plasma membrane; GO:0005576,extracellular region; GO:0042973,glucan endo-1,3-beta-D-glucosidase activity; GO:0005975,carbohydrate metabolic process; GO:0071555,cell wall organization; GO:0006952,defense response; GO:0003674,molecular_function; GO:0003824,catalytic activity; GO:0004553,hydrolase activity, hydrolyzing O-gly…	PF00332.21:Glycosyl hydrolases family 17
IFM89_005779	K12637 3-epi-6-deoxocathasterone 23-monooxygenase [EC:1.14.14.147] | (RefSeq) 3-epi-6-deoxocathasterone 23-monooxygenase-like (A)	ko00905: Brassinosteroid biosynthesis; ko01100: Metabolic pathways; ko01110: Biosynthesis of secondary metabolites	hypothetical protein IFM89_005779 [Coptis chinensis]	C90C1_ARATH RecName: Full=3-epi-6-deoxocathasterone 23-monooxygenase CYP90C1 {ECO:0000305}; Short=3-dehydro-6-deoxoteasterone {ECO:0000303|PubMed:17138693}; EC=1.14.14.147 {ECO:0000269|PubMed:17138693}; AltName: Full=(22R,23R)-22,23-dihydroxy-campest-4-en-3-one synthase {ECO:0000303|PubMed:17138693}; EC=1.14.14.- {ECO:0000269|PubMed:17138693}; AltName: Full=(22R,23R)-22,23-dihydroxycampesterol sy…	A0A835M4U3_9MAGN SubName: Full=Uncharacterized protein {ECO:0000313|EMBL:KAF9619225.1};	Cytochrome P450 CYP4/CYP19/CYP26 subfamilies	GO:0005789,endoplasmic reticulum membrane; GO:0016021,integral component of membrane; GO:0102097,(22S)-22-hydroxy-5alpha-campestan-3-one C-23 hydroxylase activity; GO:0102136,3-epi-6-deoxocathasterone C-23 hydroxylase activity; GO:0020037,heme binding; GO:0005506,iron ion binding; GO:0004497,monooxygenase activity; GO:0016491,oxidoreductase activity; GO:0016709,oxidoreductase activity, acting on …	PF00067.25:Cytochrome P450
IFM89_030295	K03798 cell division protease FtsH [EC:3.4.24.-] | (RefSeq) ATP-dependent zinc metalloprotease FTSH, chloroplastic (A)	--	hypothetical protein IFM89_030295 [Coptis chinensis]	FTSH5_ARATH RecName: Full=ATP-dependent zinc metalloprotease FTSH 5, chloroplastic; Short=AtFTSH5; EC=3.4.24.-; AltName: Full=Protein VARIEGATED 1; Flags: Precursor;	A0A835M773_9MAGN RecName: Full=AAA domain-containing protein {ECO:0000259|SMART:SM00382};	AAA+-type ATPase containing the peptidase M41 domain	GO:0009507,chloroplast; GO:0009941,chloroplast envelope; GO:0009534,chloroplast thylakoid; GO:0009535,chloroplast thylakoid membrane; GO:0016021,integral component of membrane; GO:0009536,plastid; GO:0009579,thylakoid; GO:0005524,ATP binding; GO:0016887,ATP hydrolysis activity; GO:0004176,ATP-dependent peptidase activity; GO:0046872,metal ion binding; GO:0004222,metalloendopeptidase activity; GO:…	PF01434.21:Peptidase family M41
novel.6557	K08493 vesicle transport through interaction with t-SNAREs 1 | (RefSeq) vesicle transport v-SNARE 13-like (A)	ko04130: SNARE interactions in vesicular transport	Vesicle transport v-snare [Thalictrum thalictroides]	VTI13_ARATH RecName: Full=Vesicle transport v-SNARE 13 {ECO:0000303|PubMed:24737717}; Short=AtVTI13 {ECO:0000303|PubMed:24737717}; AltName: Full=Vesicle soluble NSF attachment protein receptor 13 {ECO:0000303|PubMed:24737717}; AltName: Full=Vesicle transport v-SNARE protein VTI13 {ECO:0000303|PubMed:24737717};	A0A5K0X8T9_9MAGN SubName: Full=Uncharacterized protein {ECO:0000313|EMBL:VVV61797.1}; Flags: Fragment;	V-SNARE	GO:0031901,early endosome membrane; GO:0005789,endoplasmic reticulum membrane; GO:0010008,endosome membrane; GO:0012507,ER to Golgi transport vesicle membrane; GO:0005794,Golgi apparatus; GO:0016021,integral component of membrane; GO:0031902,late endosome membrane; GO:0009705,plant-type vacuole membrane; GO:0031201,SNARE complex; GO:0005484,SNAP receptor activity; GO:0000149,SNARE binding; GO:000…	PF20122.2:Family of unknown function (DUF6512)
IFM89_019818	--	--	hypothetical protein IFM89_019818 [Coptis chinensis]	O3L2_ARATH RecName: Full=Protein OXIDATIVE STRESS 3 LIKE 2 {ECO:0000303|PubMed:18980652}; Short=AtO3L2 {ECO:0000303|PubMed:18980652};	A0A835I960_9MAGN SubName: Full=Uncharacterized protein {ECO:0000313|EMBL:KAF9614690.1};	Nuclear localization sequence binding protein	GO:0005634,nucleus; GO:0000325,plant-type vacuole; GO:0005575,cellular_component; GO:0005622,intracellular anatomical structure; GO:0043226,organelle; GO:0043227,membrane-bounded organelle; GO:0043229,intracellular organelle; GO:0043231,intracellular membrane-bounded organelle; GO:0110165,cellular anatomical entity; GO:0005737,cytoplasm; GO:0005773,vacuole	--
IFM89_033856	K12823 ATP-dependent RNA helicase DDX5/DBP2 [EC:3.6.4.13] | (RefSeq) ATP-dependent RNA helicase-like protein DB10 (A)	ko03040: Spliceosome	hypothetical protein IFM89_033856, partial [Coptis chinensis]	DB10_NICSY RecName: Full=ATP-dependent RNA helicase-like protein DB10; EC=3.6.4.13;	A0A835HYX9_9MAGN SubName: Full=Uncharacterized protein {ECO:0000313|EMBL:KAF9607311.1};	ATP-dependent RNA helicase	GO:0005524,ATP binding; GO:0016887,ATP hydrolysis activity; GO:0003723,RNA binding; GO:0003724,RNA helicase activity; GO:0000166,nucleotide binding; GO:0003674,molecular_function; GO:0005488,binding; GO:0017076,purine nucleotide binding; GO:0030554,adenyl nucleotide binding; GO:0032553,ribonucleotide binding; GO:0032555,purine ribonucleotide binding; GO:0032559,adenyl ribonucleotide binding; GO:0…	PF00270.32:DEAD/DEAH box helicase
IFM89_003733	K01626 3-deoxy-7-phosphoheptulonate synthase [EC:2.5.1.54] | (RefSeq) phospho-2-dehydro-3-deoxyheptonate aldolase 1, chloroplastic-like (A)	ko00400: Phenylalanine, tyrosine and tryptophan biosynthesis; ko01100: Metabolic pathways; ko01110: Biosynthesis of secondary metabolites; ko01230: Biosynthesis of amino acids	hypothetical protein IFM89_003733 [Coptis chinensis]	AROG1_PETHY RecName: Full=Phospho-2-dehydro-3-deoxyheptonate aldolase 1, chloroplastic {ECO:0000305}; EC=2.5.1.54 {ECO:0000250|UniProtKB:O53512}; AltName: Full=3-deoxy-D-arabino-heptulosonate 7-phosphate synthase 1 {ECO:0000303|PubMed:23275577, ECO:0000303|PubMed:24815009}; Short=DAHP synthase 1 {ECO:0000305}; Short=PhDAHP1 {ECO:0000303|PubMed:24815009}; AltName: Full=Phospho-2-keto-3-deoxyhepton…	A0A835HZI1_9MAGN RecName: Full=Phospho-2-dehydro-3-deoxyheptonate aldolase {ECO:0000256|RuleBase:RU363071}; EC=2.5.1.54 {ECO:0000256|RuleBase:RU363071};	--	GO:0009507,chloroplast; GO:0003849,3-deoxy-7-phosphoheptulonate synthase activity; GO:0046872,metal ion binding; GO:0009073,aromatic amino acid family biosynthetic process; GO:0008652,cellular amino acid biosynthetic process; GO:0009423,chorismate biosynthetic process; GO:0010597,green leaf volatile biosynthetic process; GO:0003674,molecular_function; GO:0003824,catalytic activity; GO:0016740,tra…	PF01474.19:Class-II DAHP synthetase family
IFM89_038178	K25304 DNA-directed RNA polymerase III subunit RPC9 | (RefSeq) DNA-directed RNA polymerase III subunit rpc9-like (A)	ko03020: RNA polymerase	hypothetical protein IFM89_038178 [Coptis chinensis]	--	A0A835I3T5_9MAGN RecName: Full=DNA-directed RNA polymerase III subunit RPC9 {ECO:0000256|ARBA:ARBA00016672};	Predicted RNA polymerase III subunit C17	GO:0005666,RNA polymerase III complex; GO:0000166,nucleotide binding; GO:0006384,transcription initiation at RNA polymerase III promoter; GO:0003674,molecular_function; GO:0005488,binding; GO:0036094,small molecule binding; GO:0097159,organic cyclic compound binding; GO:1901265,nucleoside phosphate binding; GO:1901363,heterocyclic compound binding; GO:0006139,nucleobase-containing compound metabo…	PF03874.19:RNA polymerase Rpb4
IFM89_033983	K03686 molecular chaperone DnaJ | (RefSeq) hypothetical protein (A)	--	hypothetical protein IFM89_033983 [Coptis chinensis]	DNJ11_ARATH RecName: Full=Chaperone protein dnaJ 11, chloroplastic; Short=AtDjC11; Short=AtJ11; Flags: Precursor;	A0A835M7N4_9MAGN RecName: Full=J domain-containing protein {ECO:0000259|PROSITE:PS50076};	Molecular chaperone (DnaJ superfamily)	GO:0009507,chloroplast; GO:0009570,chloroplast stroma; GO:0005634,nucleus; GO:0009536,plastid; GO:0005575,cellular_component; GO:0005622,intracellular anatomical structure; GO:0005737,cytoplasm; GO:0043226,organelle; GO:0043227,membrane-bounded organelle; GO:0043229,intracellular organelle; GO:0043231,intracellular membrane-bounded organelle; GO:0110165,cellular anatomical entity; GO:0009532,plas…	PF00226.34:DnaJ domain
IFM89_015272	K12836 splicing factor U2AF 35 kDa subunit | (RefSeq) splicing factor U2af small subunit B-like (A)	ko03040: Spliceosome	hypothetical protein IFM89_015272 [Coptis chinensis]	U2AFB_ARATH RecName: Full=Splicing factor U2af small subunit B; AltName: Full=U2 auxiliary factor 35 kDa subunit B; AltName: Full=U2 small nuclear ribonucleoprotein auxiliary factor small subunit B; Short=U2 snRNP auxiliary factor small subunit B; AltName: Full=Zinc finger CCCH domain-containing protein 60; Short=AtC3H60;	A0A835HD83_9MAGN SubName: Full=Uncharacterized protein {ECO:0000313|EMBL:KAF9597081.1};	U2 snRNP splicing factor, small subunit, and related proteins	GO:0016607,nuclear speck; GO:0005634,nucleus; GO:0005681,spliceosomal complex; GO:0089701,U2AF complex; GO:0003677,DNA binding; GO:0046872,metal ion binding; GO:0030628,pre-mRNA 3'-splice site binding; GO:0000398,mRNA splicing, via spliceosome; GO:0048573,photoperiodism, flowering; GO:0003674,molecular_function; GO:0003676,nucleic acid binding; GO:0005488,binding; GO:0097159,organic cyclic compou…	PF00642.27:Zinc finger C-x8-C-x5-C-x3-H type (and similar)
IFM89_018775	--	--	--	--	--	--	--	--
IFM89_023516	--	--	hypothetical protein IFM89_023516 [Coptis chinensis]	HHL1_ARATH RecName: Full=Protein HHL1, chloroplastic {ECO:0000305}; AltName: Full=Hypersensitive to high light 1 {ECO:0000303|PubMed:24632535}; Flags: Precursor;	A0A835HLS9_9MAGN SubName: Full=Uncharacterized protein {ECO:0000313|EMBL:KAF9601829.1};	Metalloendopeptidase family - saccharolysin & thimet oligopeptidase	GO:0009507,chloroplast; GO:0009941,chloroplast envelope; GO:0009534,chloroplast thylakoid; GO:0009535,chloroplast thylakoid membrane; GO:0016021,integral component of membrane; GO:0005739,mitochondrion; GO:0003729,mRNA binding; GO:0003674,molecular_function; GO:0003676,nucleic acid binding; GO:0003723,RNA binding; GO:0005488,binding; GO:0097159,organic cyclic compound binding; GO:1901363,heterocy…	PF20133.2:Protein HHL1-like
novel.6789	K01148 poly(A)-specific ribonuclease [EC:3.1.13.4] | (RefSeq) poly(A)-specific ribonuclease PARN (A)	ko03018: RNA degradation	hypothetical protein AQUCO_11000006v1 [Aquilegia coerulea]	PARN_ARATH RecName: Full=Poly(A)-specific ribonuclease PARN; EC=3.1.13.4; AltName: Full=Polyadenylate-specific ribonuclease; Short=AtPARN; AltName: Full=Protein ABA hypersensitive germination 2;	A0A2G5C437_AQUCA SubName: Full=Uncharacterized protein {ECO:0000313|EMBL:PIA25587.1};	Poly(A)-specific exoribonuclease PARN	GO:0005737,cytoplasm; GO:0005739,mitochondrion; GO:0005634,nucleus; GO:0000175,3'-5'-exoribonuclease activity; GO:0043169,cation binding; GO:0046872,metal ion binding; GO:0004535,poly(A)-specific ribonuclease activity; GO:0003723,RNA binding; GO:0006952,defense response; GO:0006397,mRNA processing; GO:0009737,response to abscisic acid; GO:0006970,response to osmotic stress; GO:0009751,response to…	PF04857.23:CAF1 family ribonuclease
novel.6353	K12820 pre-mRNA-splicing factor ATP-dependent RNA helicase DHX15/PRP43 [EC:3.6.4.13] | (RefSeq) F-box protein At5g03970-like (A)	ko03040: Spliceosome	hypothetical protein IFM89_012686 [Coptis chinensis]	FB20_ARATH RecName: Full=F-box protein At1g30790;	A0A835LH16_9MAGN RecName: Full=PORR domain-containing protein {ECO:0000259|Pfam:PF11955};	--	GO:0005737,cytoplasm; GO:0005575,cellular_component; GO:0005622,intracellular anatomical structure; GO:0110165,cellular anatomical entity	--
IFM89_034846	K04077 chaperonin GroEL | (RefSeq) chaperonin CPN60-2, mitochondrial (A)	ko03018: RNA degradation	hypothetical protein IFM89_034846 [Coptis chinensis]	CH62_CUCMA RecName: Full=Chaperonin CPN60-2, mitochondrial; AltName: Full=HSP60-2; Flags: Precursor;	A0A835LX97_9MAGN RecName: Full=Peptidylprolyl isomerase {ECO:0000256|PROSITE-ProRule:PRU00277}; EC=5.2.1.8 {ECO:0000256|PROSITE-ProRule:PRU00277};	Mitochondrial chaperonin, Cpn60/Hsp60p	GO:0005739,mitochondrion; GO:0005524,ATP binding; GO:0140662,ATP-dependent protein folding chaperone; GO:0042026,protein refolding; GO:0000166,nucleotide binding; GO:0003674,molecular_function; GO:0005488,binding; GO:0017076,purine nucleotide binding; GO:0030554,adenyl nucleotide binding; GO:0032553,ribonucleotide binding; GO:0032555,purine ribonucleotide binding; GO:0032559,adenyl ribonucleotide…	PF00118.27:TCP-1/cpn60 chaperonin family
IFM89_004602	K09590 brassinosteroid-6-oxidase 1 [EC:1.14.-.-] | (RefSeq) cytochrome P450 85A1-like (A)	ko00905: Brassinosteroid biosynthesis; ko01100: Metabolic pathways; ko01110: Biosynthesis of secondary metabolites	hypothetical protein IFM89_004602 [Coptis chinensis]	C85A_PHAVU RecName: Full=Cytochrome P450 85A {ECO:0000303|PubMed:15221144}; Short=PvCYP85A {ECO:0000303|PubMed:15221144}; EC=1.14.14.- {ECO:0000250|UniProtKB:Q9FMA5}; AltName: Full=C6-oxidase {ECO:0000250|UniProtKB:Q9FMA5};	A0A835LDJ5_9MAGN SubName: Full=Uncharacterized protein {ECO:0000313|EMBL:KAF9591548.1};	Cytochrome P450 CYP4/CYP19/CYP26 subfamilies	GO:0016021,integral component of membrane; GO:0020037,heme binding; GO:0005506,iron ion binding; GO:0004497,monooxygenase activity; GO:0016705,oxidoreductase activity, acting on paired donors, with incorporation or reduction of molecular oxygen; GO:0003674,molecular_function; GO:0005488,binding; GO:0046906,tetrapyrrole binding; GO:0097159,organic cyclic compound binding; GO:1901363,heterocyclic c…	PF00067.25:Cytochrome P450
IFM89_027923	K03141 transcription initiation factor TFIIH subunit 1 | (RefSeq) general transcription and DNA repair factor IIH subunit TFB1-1-like isoform X1 (A)	ko03022: Basal transcription factors; ko03420: Nucleotide excision repair	hypothetical protein IFM89_027923 [Coptis chinensis]	TFB1A_ARATH RecName: Full=General transcription and DNA repair factor IIH subunit TFB1-1; Short=AtTFB1-1 {ECO:0000303|PubMed:15645454}; Short=TFIIH subunit TFB1-1; AltName: Full=RNA polymerase II transcription factor B subunit 1-1;	A0A835HHJ6_9MAGN SubName: Full=Uncharacterized protein {ECO:0000313|EMBL:KAF9598489.1};	--	GO:0000439,transcription factor TFIIH core complex; GO:0005675,transcription factor TFIIH holo complex; GO:0006281,DNA repair; GO:0006289,nucleotide-excision repair; GO:0070816,phosphorylation of RNA polymerase II C-terminal domain; GO:0006360,transcription by RNA polymerase I; GO:0006366,transcription by RNA polymerase II; GO:0006139,nucleobase-containing compound metabolic process; GO:0006259,D…	PF03000.17:NPH3 family
IFM89_012412	--	--	hypothetical protein IFM89_012412 [Coptis chinensis]	VIL2_ARATH RecName: Full=VIN3-like protein 2; AltName: Full=Vernalization5/VIN3-like protein 1;	A0A835IBP4_9MAGN RecName: Full=Fibronectin type-III domain-containing protein {ECO:0000259|PROSITE:PS50853};	--	GO:0005677,chromatin silencing complex; GO:0031519,PcG protein complex; GO:0009506,plasmodesma; GO:0003677,DNA binding; GO:0042802,identical protein binding; GO:0046872,metal ion binding; GO:0035064,methylated histone binding; GO:0032922,circadian regulation of gene expression; GO:0009908,flower development; GO:1900111,positive regulation of histone H3-K9 dimethylation; GO:0040029,epigenetic regu…	PF07227.14:PHD - plant homeodomain finger protein
IFM89_016410	K00430 peroxidase [EC:1.11.1.7] | (RefSeq) peroxidase N (A)	ko00940: Phenylpropanoid biosynthesis; ko01100: Metabolic pathways; ko01110: Biosynthesis of secondary metabolites	hypothetical protein IFM89_016410 [Coptis chinensis]	PERN_ARMRU RecName: Full=Peroxidase N; EC=1.11.1.7; AltName: Full=Neutral peroxidase; Flags: Precursor;	A0A835HDF4_9MAGN RecName: Full=Peroxidase {ECO:0000256|RuleBase:RU362060}; EC=1.11.1.7 {ECO:0000256|RuleBase:RU362060};	--	GO:0005576,extracellular region; GO:0020037,heme binding; GO:0046872,metal ion binding; GO:0004601,peroxidase activity; GO:0042744,hydrogen peroxide catabolic process; GO:0006979,response to oxidative stress; GO:0003674,molecular_function; GO:0005488,binding; GO:0046906,tetrapyrrole binding; GO:0097159,organic cyclic compound binding; GO:1901363,heterocyclic compound binding; GO:0043167,ion bindi…	PF00141.26:Peroxidase
IFM89_025458	K14486 auxin response factor | (RefSeq) auxin response factor 19-like (A)	ko04075: Plant hormone signal transduction	hypothetical protein IFM89_025458 [Coptis chinensis]	LOB_ARATH RecName: Full=Protein LATERAL ORGAN BOUNDARIES; AltName: Full=ASYMMETRIC LEAVES 2-like protein 4; Short=AS2-like protein 4;	A0A835MAM5_9MAGN RecName: Full=LOB domain-containing protein {ECO:0000259|PROSITE:PS50891};	--	GO:0000976,transcription cis-regulatory region binding; GO:0010199,organ boundary specification between lateral organs and the meristem; GO:0001067,transcription regulatory region nucleic acid binding; GO:0003674,molecular_function; GO:0003676,nucleic acid binding; GO:0003677,DNA binding; GO:0003690,double-stranded DNA binding; GO:0005488,binding; GO:0043565,sequence-specific DNA binding; GO:0097…	PF03195.17:Lateral organ boundaries (LOB) domain
IFM89_004970	K20715 phototropin [EC:2.7.11.1] | (RefSeq) phototropin-2-like isoform X1 (A)	--	hypothetical protein IFM89_004970 [Coptis chinensis]	TLOV1_ARATH RecName: Full=Protein TWIN LOV 1;	A0A835HTA7_9MAGN SubName: Full=Uncharacterized protein {ECO:0000313|EMBL:KAF9604264.1};	--	GO:0005634,nucleus; GO:0009881,photoreceptor activity; GO:0009637,response to blue light; GO:0003674,molecular_function; GO:0038023,signaling receptor activity; GO:0060089,molecular transducer activity; GO:0008150,biological_process; GO:0009314,response to radiation; GO:0009416,response to light stimulus; GO:0009628,response to abiotic stimulus; GO:0050896,response to stimulus; GO:0005575,cellula…	PF13426.10:PAS domain
IFM89_007330	K03113 translation initiation factor 1 | (RefSeq) protein translation factor SUI1 homolog (A)	--	uncharacterized protein DS421_18g612810 [Arachis hypogaea]	SUI1_SALBA RecName: Full=Protein translation factor SUI1 homolog;	A0A835GVE2_9MAGN RecName: Full=SUI1 domain-containing protein {ECO:0000259|PROSITE:PS50296};	Translation initiation factor 1 (eIF-1/SUI1)	GO:0003743,translation initiation factor activity; GO:0003674,molecular_function; GO:0003676,nucleic acid binding; GO:0005488,binding; GO:0008135,translation factor activity, RNA binding; GO:0045182,translation regulator activity; GO:0090079,translation regulator activity, nucleic acid binding; GO:0097159,organic cyclic compound binding; GO:1901363,heterocyclic compound binding	PF01253.25:Translation initiation factor SUI1
IFM89_002224	K01968 3-methylcrotonyl-CoA carboxylase alpha subunit [EC:6.4.1.4] | (RefSeq) methylcrotonoyl-CoA carboxylase subunit alpha, mitochondrial (A)	ko00280: Valine, leucine and isoleucine degradation; ko01100: Metabolic pathways	hypothetical protein IFM89_002224 [Coptis chinensis]	MCCA_SOYBN RecName: Full=Methylcrotonoyl-CoA carboxylase subunit alpha, mitochondrial; Short=MCCase subunit alpha; EC=6.4.1.4; AltName: Full=3-methylcrotonyl-CoA carboxylase 1; AltName: Full=3-methylcrotonyl-CoA:carbon dioxide ligase subunit alpha; Flags: Precursor;	A0A835IJZ8_9MAGN SubName: Full=Uncharacterized protein {ECO:0000313|EMBL:KAF9618529.1};	3-Methylcrotonyl-CoA carboxylase, biotin-containing subunit/Propionyl-CoA carboxylase, alpha chain/Acetyl-CoA carboxylase, biotin carboxylase subunit	GO:0005759,mitochondrial matrix; GO:0005739,mitochondrion; GO:0005524,ATP binding; GO:0046872,metal ion binding; GO:0004485,methylcrotonoyl-CoA carboxylase activity; GO:0006552,leucine catabolic process; GO:0000166,nucleotide binding; GO:0003674,molecular_function; GO:0005488,binding; GO:0017076,purine nucleotide binding; GO:0030554,adenyl nucleotide binding; GO:0032553,ribonucleotide binding; GO…	PF02786.20:Carbamoyl-phosphate synthase L chain, ATP binding domain
IFM89_030593	K00276 primary-amine oxidase [EC:1.4.3.21] | (RefSeq) primary amine oxidase-like (A)	ko00260: Glycine, serine and threonine metabolism; ko00350: Tyrosine metabolism; ko00360: Phenylalanine metabolism; ko00410: beta-Alanine metabolism; ko00950: Isoquinoline alkaloid biosynthesis; ko00960: Tropane, piperidine and pyridine alkaloid biosynthesis; ko01100: Metabolic pathways; ko01110: Biosynthesis of secondary metabolites	hypothetical protein IFM89_030593 [Coptis chinensis]	CAOG1_ARATH RecName: Full=Amine oxidase [copper-containing] gamma 1 {ECO:0000303|PubMed:31862580}; Short=AtCuAO1 {ECO:0000303|PubMed:21471330, ECO:0000303|PubMed:23915037}; Short=AtCuAOgamma1 {ECO:0000303|PubMed:31862580}; Short=Copper amine oxidase 1 {ECO:0000303|PubMed:21471330}; EC=1.4.3.21 {ECO:0000269|PubMed:23915037}; AltName: Full=Primary amine oxidase 1 {ECO:0000305}; Flags: Precursor;	A0A835HKX0_9MAGN RecName: Full=Amine oxidase {ECO:0000256|RuleBase:RU000672}; EC=1.4.3.- {ECO:0000256|RuleBase:RU000672};	Copper amine oxidase	GO:0005615,extracellular space; GO:0052595,aliphatic amine oxidase activity; GO:0052594,aminoacetone:oxygen oxidoreductase(deaminating) activity; GO:0005507,copper ion binding; GO:0052596,phenethylamine:oxygen oxidoreductase (deaminating) activity; GO:0008131,primary amine oxidase activity; GO:0048038,quinone binding; GO:0052593,tryptamine:oxygen oxidoreductase (deaminating) activity; GO:0009738,…	PF01179.23:Copper amine oxidase, enzyme domain
novel.291	--	--	--	--	--	--	--	--
IFM89_018380	K08331 autophagy-related protein 13 | (RefSeq) autophagy-related protein 13b (A)	ko04136: Autophagy - other	hypothetical protein IFM89_018380 [Coptis chinensis]	AT13B_ARATH RecName: Full=Autophagy-related protein 13b {ECO:0000303|PubMed:12114572}; Short=AtAPG13b {ECO:0000303|PubMed:12114572};	A0A835LN90_9MAGN RecName: Full=ATG13 domain-containing protein {ECO:0000259|Pfam:PF10033};	Phosphoprotein involved in cytoplasm to vacuole targeting and autophagy	GO:1990316,Atg1/ULK1 kinase complex; GO:0005776,autophagosome; GO:0031410,cytoplasmic vesicle; GO:0005829,cytosol; GO:0019898,extrinsic component of membrane; GO:0000407,phagophore assembly site; GO:0000423,mitophagy; GO:0034727,piecemeal microautophagy of the nucleus; GO:0034497,protein localization to phagophore assembly site; GO:0015031,protein transport; GO:0000422,autophagy of mitochondrion;…	PF10033.12:Autophagy-related protein 13
IFM89_012949	K01904 4-coumarate--CoA ligase [EC:6.2.1.12] | (RefSeq) 4-coumarate--CoA ligase 2-like (A)	ko00130: Ubiquinone and other terpenoid-quinone biosynthesis; ko00940: Phenylpropanoid biosynthesis; ko01100: Metabolic pathways; ko01110: Biosynthesis of secondary metabolites	hypothetical protein IFM89_012949 [Coptis chinensis]	4CL2_SOYBN RecName: Full=4-coumarate--CoA ligase 2; Short=4CL 2; EC=6.2.1.12; AltName: Full=4-coumaroyl-CoA synthase 2; AltName: Full=Clone 4CL16;	A0A835IWP3_9MAGN SubName: Full=Uncharacterized protein {ECO:0000313|EMBL:KAF9624678.1};	Acyl-CoA synthetase	GO:0016207,4-coumarate-CoA ligase activity; GO:0005524,ATP binding; GO:0016405,CoA-ligase activity; GO:0009698,phenylpropanoid metabolic process; GO:0003674,molecular_function; GO:0003824,catalytic activity; GO:0016874,ligase activity; GO:0016877,ligase activity, forming carbon-sulfur bonds; GO:0016878,acid-thiol ligase activity; GO:0000166,nucleotide binding; GO:0005488,binding; GO:0017076,purin…	PF00501.31:AMP-binding enzyme
IFM89_007551	K22128 piezo-type mechanosensitive ion channel component 1/2 | (RefSeq) hypothetical protein (A)	--	hypothetical protein IFM89_007551 [Coptis chinensis]	BABL_LILLO RecName: Full=Chemocyanin; AltName: Full=Basic blue protein; AltName: Full=Plantacyanin; Flags: Precursor;	A0A835HWC8_9MAGN RecName: Full=Phytocyanin domain-containing protein {ECO:0000259|PROSITE:PS51485};	--	GO:0009055,electron transfer activity; GO:0046872,metal ion binding; GO:0003674,molecular_function; GO:0003824,catalytic activity; GO:0016491,oxidoreductase activity; GO:0005488,binding; GO:0043167,ion binding; GO:0043169,cation binding	PF02298.20:Plastocyanin-like domain
IFM89_012393	K08486 syntaxin 1B/2/3 | (RefSeq) syntaxin-132-like (A)	ko04130: SNARE interactions in vesicular transport	hypothetical protein IFM89_007897 [Coptis chinensis]	SY132_ARATH RecName: Full=Syntaxin-132 {ECO:0000305}; Short=AtSYP132 {ECO:0000305};	A0A835I990_9MAGN RecName: Full=t-SNARE coiled-coil homology domain-containing protein {ECO:0000259|PROSITE:PS50192};	SNARE protein Syntaxin 1 and related proteins	GO:0012505,endomembrane system; GO:0016021,integral component of membrane; GO:0005886,plasma membrane; GO:0031201,SNARE complex; GO:0005484,SNAP receptor activity; GO:0000149,SNARE binding; GO:0007049,cell cycle; GO:0051301,cell division; GO:0006887,exocytosis; GO:0006886,intracellular protein transport; GO:0040008,regulation of growth; GO:0048278,vesicle docking; GO:0006906,vesicle fusion; GO:00…	PF00804.28:Syntaxin
IFM89_005116	K00847 fructokinase [EC:2.7.1.4] | (RefSeq) fructokinase-2-like (A)	ko00051: Fructose and mannose metabolism; ko00500: Starch and sucrose metabolism; ko00520: Amino sugar and nucleotide sugar metabolism; ko01100: Metabolic pathways; ko01110: Biosynthesis of secondary metabolites; ko01250: Biosynthesis of nucleotide sugars	hypothetical protein IFM89_005116 [Coptis chinensis]	SCRK2_ORYSI RecName: Full=Fructokinase-2; EC=2.7.1.4; AltName: Full=Fructokinase II; AltName: Full=OsFKII;	A0A835M7C0_9MAGN RecName: Full=PfkB domain-containing protein {ECO:0000259|Pfam:PF00294};	Ribokinase	GO:0005524,ATP binding; GO:0008865,fructokinase activity; GO:0019252,starch biosynthetic process; GO:0000166,nucleotide binding; GO:0003674,molecular_function; GO:0005488,binding; GO:0017076,purine nucleotide binding; GO:0030554,adenyl nucleotide binding; GO:0032553,ribonucleotide binding; GO:0032555,purine ribonucleotide binding; GO:0032559,adenyl ribonucleotide binding; GO:0035639,purine ribonu…	PF00294.27:pfkB family carbohydrate kinase
IFM89_008715	K08901 photosystem II oxygen-evolving enhancer protein 3 | (RefSeq) oxygen-evolving enhancer protein 3-2, chloroplastic-like (A)	ko00195: Photosynthesis; ko01100: Metabolic pathways	hypothetical protein IFM89_008715 [Coptis chinensis]	PSBQ_SPIOL RecName: Full=Oxygen-evolving enhancer protein 3, chloroplastic; Short=OEE3; AltName: Full=16 kDa subunit of oxygen evolving system of photosystem II; AltName: Full=OEC 16 kDa subunit; Flags: Precursor;	A0A835H054_9MAGN SubName: Full=Uncharacterized protein {ECO:0000313|EMBL:KAF9588298.1};	--	GO:0009535,chloroplast thylakoid membrane; GO:0019898,extrinsic component of membrane; GO:0009654,photosystem II oxygen evolving complex; GO:0005509,calcium ion binding; GO:0015979,photosynthesis; GO:0003674,molecular_function; GO:0005488,binding; GO:0043167,ion binding; GO:0043169,cation binding; GO:0046872,metal ion binding; GO:0008150,biological_process; GO:0008152,metabolic process; GO:000998…	PF05757.14:Oxygen evolving enhancer protein 3 (PsbQ)
novel.5547	--	--	hypothetical protein BVC80_9055g9 [Macleaya cordata]	--	A0A200R9I5_9MAGN SubName: Full=Uncharacterized protein {ECO:0000313|EMBL:OVA19389.1};	--	--	--
IFM89_004627	--	--	hypothetical protein IFM89_004627 [Coptis chinensis]	AFP3_ARATH RecName: Full=Ninja-family protein AFP3; AltName: Full=ABI five-binding protein 3; Short=ABI5-binding protein 3;	A0A835H4S1_9MAGN RecName: Full=Ninja-family protein {ECO:0000256|RuleBase:RU369029}; AltName: Full=ABI-binding protein {ECO:0000256|RuleBase:RU369029};	--	GO:0005634,nucleus; GO:0045892,negative regulation of DNA-templated transcription; GO:0009737,response to abscisic acid; GO:0007165,signal transduction; GO:0006139,nucleobase-containing compound metabolic process; GO:0006351,DNA-templated transcription; GO:0006355,regulation of DNA-templated transcription; GO:0006725,cellular aromatic compound metabolic process; GO:0006807,nitrogen compound metab…	PF07897.14:Ethylene-responsive binding factor-associated repression
novel.8106	--	--	Homeobox protein knotted-1-like 2 [Vitis vinifera]	KN1_SOLLC RecName: Full=Homeotic protein knotted-1; Short=TKN1;	A0A438KMS0_VITVI SubName: Full=Homeobox protein knotted-1-like 2 {ECO:0000313|EMBL:RVX22496.1};	Transcription factor MEIS1 and related HOX domain proteins	GO:0005634,nucleus; GO:0000981,DNA-binding transcription factor activity, RNA polymerase II-specific; GO:0000978,RNA polymerase II cis-regulatory region sequence-specific DNA binding; GO:0006357,regulation of transcription by RNA polymerase II; GO:0003674,molecular_function; GO:0003700,DNA-binding transcription factor activity; GO:0140110,transcription regulator activity; GO:0000976,transcription…	PF03790.16:KNOX1 domain
IFM89_014570	--	--	hypothetical protein IFM89_014570 [Coptis chinensis]	TCP4_ARATH RecName: Full=Transcription factor TCP4; AltName: Full=Protein MATERNAL EFFECT EMBRYO ARREST 35;	A0A835GXH8_9MAGN RecName: Full=TCP domain-containing protein {ECO:0000259|PROSITE:PS51369};	--	GO:0005634,nucleus; GO:0003677,DNA binding; GO:0001216,DNA-binding transcription activator activity; GO:0003700,DNA-binding transcription factor activity; GO:0043565,sequence-specific DNA binding; GO:1990837,sequence-specific double-stranded DNA binding; GO:0048825,cotyledon development; GO:0048826,cotyledon morphogenesis; GO:0009793,embryo development ending in seed dormancy; GO:0048366,leaf dev…	PF03634.16:TCP family transcription factor
IFM89_016433	K10583 ubiquitin-conjugating enzyme E2 S [EC:2.3.2.23] | (RefSeq) ubiquitin-conjugating enzyme E2 22 (A)	ko04120: Ubiquitin mediated proteolysis	hypothetical protein IFM89_016433 [Coptis chinensis]	UBC22_ARATH RecName: Full=Ubiquitin-conjugating enzyme E2 22; EC=2.3.2.23; AltName: Full=E2 ubiquitin-conjugating enzyme 22; AltName: Full=Ubiquitin carrier protein 22;	A0A835LLW2_9MAGN RecName: Full=UBC core domain-containing protein {ECO:0000259|PROSITE:PS50127};	Ubiquitin-protein ligase	GO:0005634,nucleus; GO:0005524,ATP binding; GO:0061631,ubiquitin conjugating enzyme activity; GO:0004842,ubiquitin-protein transferase activity; GO:0000209,protein polyubiquitination; GO:0006511,ubiquitin-dependent protein catabolic process; GO:0000166,nucleotide binding; GO:0003674,molecular_function; GO:0005488,binding; GO:0017076,purine nucleotide binding; GO:0030554,adenyl nucleotide binding;…	PF00179.29:Ubiquitin-conjugating enzyme
novel.2125	K23286 neurobeachin-like protein 1/2 | (RefSeq) predicted protein (A)	--	hypothetical protein IFM89_022420 [Coptis chinensis]	BCHB_ARATH RecName: Full=BEACH domain-containing protein B {ECO:0000303|PubMed:25618824}; AltName: Full=BEACH-domain homolog B {ECO:0000305};	A0A835I377_9MAGN SubName: Full=Uncharacterized protein {ECO:0000313|EMBL:KAF9610456.1};	Kinase A-anchor protein Neurobeachin and related BEACH and WD40 repeat proteins	GO:0005739,mitochondrion; GO:0005575,cellular_component; GO:0005622,intracellular anatomical structure; GO:0005737,cytoplasm; GO:0043226,organelle; GO:0043227,membrane-bounded organelle; GO:0043229,intracellular organelle; GO:0043231,intracellular membrane-bounded organelle; GO:0110165,cellular anatomical entity	PF02138.21:Beige/BEACH domain
novel.8345	K06272 integrin-linked kinase [EC:2.7.11.1] | (RefSeq) probable serine/threonine-protein kinase DDB_G0271682 isoform X1 (A)	--	hypothetical protein BUALT_Bualt09G0003400 [Buddleja alternifolia]	ILK1_ARATH RecName: Full=Integrin-linked protein kinase 1 {ECO:0000303|PubMed:27208244}; EC=2.7.11.1 {ECO:0000269|PubMed:27208244}; AltName: Full=Ankyrin protein kinase 1 {ECO:0000303|PubMed:12650621};	A0A7J7NC85_9MAGN RecName: Full=Protein kinase domain-containing protein {ECO:0000259|PROSITE:PS50011};	Tyrosine kinase specific for activated (GTP-bound) p21cdc42Hs	GO:0009898,cytoplasmic side of plasma membrane; GO:0005783,endoplasmic reticulum; GO:0005789,endoplasmic reticulum membrane; GO:0005524,ATP binding; GO:0004672,protein kinase activity; GO:0106310,protein serine kinase activity; GO:0004674,protein serine/threonine kinase activity; GO:0004712,protein serine/threonine/tyrosine kinase activity; GO:0045087,innate immune response; GO:0046777,protein au…	PF00023.33:Ankyrin repeat
IFM89_021560	K00058 D-3-phosphoglycerate dehydrogenase / 2-oxoglutarate reductase [EC:1.1.1.95 1.1.1.399] | (RefSeq) D-3-phosphoglycerate dehydrogenase 3, chloroplastic-like (A)	ko00260: Glycine, serine and threonine metabolism; ko00270: Cysteine and methionine metabolism; ko01100: Metabolic pathways; ko01110: Biosynthesis of secondary metabolites; ko01200: Carbon metabolism; ko01230: Biosynthesis of amino acids	hypothetical protein IFM89_021560 [Coptis chinensis]	SERA1_ARATH RecName: Full=D-3-phosphoglycerate dehydrogenase 1, chloroplastic; EC=1.1.1.95 {ECO:0000269|PubMed:24368794}; AltName: Full=Protein EMBRYO SAC DEVELOPMENT ARREST 9; Flags: Precursor;	A0A835ICH3_9MAGN RecName: Full=ACT domain-containing protein {ECO:0000259|PROSITE:PS51671};	D-3-phosphoglycerate dehydrogenase, D-isomer-specific 2-hydroxy acid dehydrogenase superfamily	GO:0009507,chloroplast; GO:0009570,chloroplast stroma; GO:0005739,mitochondrion; GO:0005886,plasma membrane; GO:0009536,plastid; GO:0005524,ATP binding; GO:0051287,NAD binding; GO:0004617,phosphoglycerate dehydrogenase activity; GO:0009793,embryo development ending in seed dormancy; GO:0006564,L-serine biosynthetic process; GO:0009561,megagametogenesis; GO:0009555,pollen development; GO:0000096,s…	PF02826.22:D-isomer specific 2-hydroxyacid dehydrogenase, NAD binding domain
IFM89_018345	--	--	hypothetical protein IFM89_018345 [Coptis chinensis]	--	A0A835HIB5_9MAGN SubName: Full=Uncharacterized protein {ECO:0000313|EMBL:KAF9601235.1};	--	GO:0005199,structural constituent of cell wall; GO:0009664,plant-type cell wall organization; GO:0003674,molecular_function; GO:0005198,structural molecule activity; GO:0008150,biological_process; GO:0009987,cellular process; GO:0016043,cellular component organization; GO:0045229,external encapsulating structure organization; GO:0071554,cell wall organization or biogenesis; GO:0071555,cell wall o…	PF04554.16:Extensin-like region
IFM89_002458	K24139 auxin efflux carrier family protein | (RefSeq) protein PIN-LIKES 7-like (A)	--	hypothetical protein IFM89_002458 [Coptis chinensis]	PILS7_ARATH RecName: Full=Protein PIN-LIKES 7 {ECO:0000303|PubMed:22504182}; AltName: Full=Auxin efflux carrier-like protein 7 {ECO:0000303|PubMed:22504182};	A0A835IND6_9MAGN SubName: Full=Uncharacterized protein {ECO:0000313|EMBL:KAF9618763.1};	Predicted membrane protein	GO:0005789,endoplasmic reticulum membrane; GO:0016021,integral component of membrane; GO:0009734,auxin-activated signaling pathway; GO:0080162,endoplasmic reticulum to cytosol auxin transport; GO:0009733,response to auxin; GO:0007154,cell communication; GO:0007165,signal transduction; GO:0008150,biological_process; GO:0009719,response to endogenous stimulus; GO:0009725,response to hormone; GO:000…	PF03547.21:Membrane transport protein
IFM89_020691	--	--	hypothetical protein IFM89_020691 [Coptis chinensis]	--	A0A835I5T1_9MAGN SubName: Full=Uncharacterized protein {ECO:0000313|EMBL:KAF9610182.1};	--	GO:0016021,integral component of membrane; GO:0005575,cellular_component; GO:0016020,membrane; GO:0031224,intrinsic component of membrane; GO:0110165,cellular anatomical entity	--
IFM89_014217	K01739 cystathionine gamma-synthase [EC:2.5.1.48] | (RefSeq) cystathionine gamma-synthase 1, chloroplastic-like (A)	ko00270: Cysteine and methionine metabolism; ko00450: Selenocompound metabolism; ko00920: Sulfur metabolism; ko01100: Metabolic pathways; ko01110: Biosynthesis of secondary metabolites; ko01230: Biosynthesis of amino acids	hypothetical protein IFM89_014217 [Coptis chinensis]	CGS1_ARATH RecName: Full=Cystathionine gamma-synthase 1, chloroplastic {ECO:0000305}; Short=AtCGS1 {ECO:0000305}; EC=2.5.1.48 {ECO:0000269|PubMed:9531508}; AltName: Full=METHIONINE OVERACCUMULATION 1 {ECO:0000303|PubMed:10558994}; AltName: Full=O-succinylhomoserine (thiol)-lyase; Flags: Precursor;	A0A835MCQ8_9MAGN SubName: Full=Uncharacterized protein {ECO:0000313|EMBL:KAF9624832.1};	Cystathionine beta-lyases/cystathionine gamma-synthases	GO:0009507,chloroplast; GO:0009570,chloroplast stroma; GO:0003962,cystathionine gamma-synthase activity; GO:0102028,cystathionine gamma-synthase activity (acts on O-phosphohomoserine); GO:0030170,pyridoxal phosphate binding; GO:0009086,methionine biosynthetic process; GO:0001887,selenium compound metabolic process; GO:0019346,transsulfuration; GO:0003674,molecular_function; GO:0003824,catalytic a…	PF01053.23:Cys/Met metabolism PLP-dependent enzyme
novel.8113	K01285 lysosomal Pro-X carboxypeptidase [EC:3.4.16.2] | (RefSeq) lysosomal Pro-X carboxypeptidase (A)	--	hypothetical protein AQUCO_13300024v1 [Aquilegia coerulea]	EDA2_ARATH RecName: Full=Probable serine protease EDA2; EC=3.4.-.-; AltName: Full=Protein EMBRYO SAC DEVELOPMENT ARREST 2; Flags: Precursor;	A0A2G5C185_AQUCA SubName: Full=Uncharacterized protein {ECO:0000313|EMBL:PIA25034.1};	Prolylcarboxypeptidase (angiotensinase C)	GO:0005576,extracellular region; GO:0008239,dipeptidyl-peptidase activity; GO:0008236,serine-type peptidase activity; GO:0009561,megagametogenesis; GO:0006508,proteolysis; GO:0003674,molecular_function; GO:0003824,catalytic activity; GO:0008233,peptidase activity; GO:0008238,exopeptidase activity; GO:0016787,hydrolase activity; GO:0140096,catalytic activity, acting on a protein; GO:0017171,serine…	PF05577.15:Serine carboxypeptidase S28
novel.3956	no KO assigned | (RefSeq) probable protein S-acyltransferase 7 (A)	--	probable protein S-acyltransferase 7 [Telopea speciosissima]	ZDHC9_ARATH RecName: Full=Probable protein S-acyltransferase 7; EC=2.3.1.225; AltName: Full=Probable palmitoyltransferase At3g26935; AltName: Full=Zinc finger DHHC domain-containing protein At3g26935;	A0A2G5CS49_AQUCA RecName: Full=S-acyltransferase {ECO:0000256|RuleBase:RU079119}; EC=2.3.1.225 {ECO:0000256|RuleBase:RU079119}; AltName: Full=Palmitoyltransferase {ECO:0000256|RuleBase:RU079119};	DHHC-type Zn-finger proteins	GO:0005829,cytosol; GO:0005783,endoplasmic reticulum; GO:0005794,Golgi apparatus; GO:0016021,integral component of membrane; GO:0005886,plasma membrane; GO:0019706,protein-cysteine S-palmitoyltransferase activity; GO:0018230,peptidyl-L-cysteine S-palmitoylation; GO:0006612,protein targeting to membrane; GO:0003674,molecular_function; GO:0003824,catalytic activity; GO:0016409,palmitoyltransferase …	--
IFM89_006888	K02875 large subunit ribosomal protein L14e | (RefSeq) uncharacterized protein LOC105033615 (A)	ko03010: Ribosome	hypothetical protein IFM89_006888 [Coptis chinensis]	TSJT1_TOBAC RecName: Full=Stem-specific protein TSJT1;	A0A835LDP6_9MAGN RecName: Full=DUF3700 domain-containing protein {ECO:0000259|SMART:SM01172};	--	--	PF12481.11:Aluminium induced protein
IFM89_011975	--	--	hypothetical protein IFM89_011975 [Coptis chinensis]	--	A0A835IAD7_9MAGN SubName: Full=Uncharacterized protein {ECO:0000313|EMBL:KAF9613806.1};	--	--	--
IFM89_032854	K13385 N-methylcoclaurine 3'-monooxygenase [EC:1.14.14.102] | (RefSeq) (S)-N-methylcoclaurine 3'-hydroxylase isozyme 1 (A)	ko00950: Isoquinoline alkaloid biosynthesis; ko01100: Metabolic pathways; ko01110: Biosynthesis of secondary metabolites	hypothetical protein IFM89_032854 [Coptis chinensis]	C80B2_COPJA RecName: Full=Probable (S)-N-methylcoclaurine 3'-hydroxylase isozyme 2; EC=1.14.14.102 {ECO:0000250|UniProtKB:O64899}; AltName: Full=Cytochrome P450 80B2;	A0A835II68_9MAGN SubName: Full=Uncharacterized protein {ECO:0000313|EMBL:KAF9616892.1};	Cytochrome P450 CYP2 subfamily	GO:0005789,endoplasmic reticulum membrane; GO:0016021,integral component of membrane; GO:0020037,heme binding; GO:0005506,iron ion binding; GO:0050593,N-methylcoclaurine 3'-monooxygenase activity; GO:0019438,aromatic compound biosynthetic process; GO:1901362,organic cyclic compound biosynthetic process; GO:0003674,molecular_function; GO:0005488,binding; GO:0046906,tetrapyrrole binding; GO:0097159…	PF00067.25:Cytochrome P450
IFM89_034180	K03686 molecular chaperone DnaJ | (RefSeq) chaperone protein DnaJ (A)	--	hypothetical protein IFM89_034180 [Coptis chinensis]	DNAJ8_ARATH RecName: Full=Chaperone protein dnaJ 8, chloroplastic; Short=AtDjC8; Short=AtJ8; Flags: Precursor;	A0A835IFS0_9MAGN RecName: Full=J domain-containing protein {ECO:0000259|PROSITE:PS50076};	Molecular chaperone (DnaJ superfamily)	GO:0009507,chloroplast; GO:0009570,chloroplast stroma; GO:0005634,nucleus; GO:0009416,response to light stimulus; GO:0008150,biological_process; GO:0009314,response to radiation; GO:0009628,response to abiotic stimulus; GO:0050896,response to stimulus; GO:0005575,cellular_component; GO:0005622,intracellular anatomical structure; GO:0005737,cytoplasm; GO:0009536,plastid; GO:0043226,organelle; GO:0…	PF00226.34:DnaJ domain
novel.3269	K03834 tyrosine-specific transport protein | (RefSeq) tyrosine-specific transport protein-like (A)	--	hypothetical protein AQUCO_03600078v1 [Aquilegia coerulea]	FB187_ARATH RecName: Full=Putative F-box protein At3g25750;	A0A2G5CV81_AQUCA RecName: Full=DUF295 domain-containing protein {ECO:0000259|Pfam:PF03478};	--	--	PF03478.21:Protein of unknown function (DUF295)
IFM89_009525	K01184 polygalacturonase [EC:3.2.1.15] | (RefSeq) polygalacturonase At1g48100 (A)	ko00040: Pentose and glucuronate interconversions; ko01100: Metabolic pathways	hypothetical protein IFM89_009525 [Coptis chinensis]	PGLR4_ARATH RecName: Full=Polygalacturonase At1g48100; Short=PG; EC=3.2.1.15; AltName: Full=Pectinase At1g48100; Flags: Precursor;	A0A835HU53_9MAGN SubName: Full=Uncharacterized protein {ECO:0000313|EMBL:KAF9604729.1};	--	GO:0005576,extracellular region; GO:0004650,polygalacturonase activity; GO:0005975,carbohydrate metabolic process; GO:0009831,plant-type cell wall modification involved in multidimensional cell growth; GO:0003674,molecular_function; GO:0003824,catalytic activity; GO:0004553,hydrolase activity, hydrolyzing O-glycosyl compounds; GO:0016787,hydrolase activity; GO:0016798,hydrolase activity, acting o…	PF00295.20:Glycosyl hydrolases family 28
IFM89_009131	K00432 glutathione peroxidase [EC:1.11.1.9] | (RefSeq) probable glutathione peroxidase 5 (A)	ko00480: Glutathione metabolism; ko00590: Arachidonic acid metabolism; ko01100: Metabolic pathways	hypothetical protein IFM89_009131 [Coptis chinensis]	GPX5_ARATH RecName: Full=Probable glutathione peroxidase 5; EC=1.11.1.9;	A0A835HRV7_9MAGN RecName: Full=Glutathione peroxidase {ECO:0000256|RuleBase:RU000499};	Glutathione peroxidase	GO:0005829,cytosol; GO:0012505,endomembrane system; GO:0005783,endoplasmic reticulum; GO:0005886,plasma membrane; GO:0004602,glutathione peroxidase activity; GO:0004601,peroxidase activity; GO:0009793,embryo development ending in seed dormancy; GO:0006979,response to oxidative stress; GO:0003674,molecular_function; GO:0003824,catalytic activity; GO:0016209,antioxidant activity; GO:0016491,oxidore…	PF00255.22:Glutathione peroxidase
IFM89_022620	K01188 beta-glucosidase [EC:3.2.1.21] | (RefSeq) beta-glucosidase 24-like (A)	ko00460: Cyanoamino acid metabolism; ko00500: Starch and sucrose metabolism; ko00999: Biosynthesis of various plant secondary metabolites; ko01100: Metabolic pathways; ko01110: Biosynthesis of secondary metabolites	hypothetical protein IFM89_022620 [Coptis chinensis]	BGL13_ORYSJ RecName: Full=Beta-glucosidase 13; Short=Os4bglu13; EC=3.2.1.21; Flags: Precursor;	A0A835M0P2_9MAGN SubName: Full=Uncharacterized protein {ECO:0000313|EMBL:KAF9615293.1};	Beta-glucosidase, lactase phlorizinhydrolase, and related proteins	GO:0033907,beta-D-fucosidase activity; GO:0004565,beta-galactosidase activity; GO:0008422,beta-glucosidase activity; GO:0102483,scopolin beta-glucosidase activity; GO:0005975,carbohydrate metabolic process; GO:0003674,molecular_function; GO:0003824,catalytic activity; GO:0004553,hydrolase activity, hydrolyzing O-glycosyl compounds; GO:0016787,hydrolase activity; GO:0016798,hydrolase activity, act…	PF00232.21:Glycosyl hydrolase family 1
IFM89_012137	K00787 farnesyl diphosphate synthase [EC:2.5.1.1 2.5.1.10] | (RefSeq) putative WEB family protein At4g17210 (A)	ko00900: Terpenoid backbone biosynthesis; ko01100: Metabolic pathways; ko01110: Biosynthesis of secondary metabolites	hypothetical protein IFM89_012137 [Coptis chinensis]	Y5586_ARATH RecName: Full=WEB family protein At5g55860;	A0A835HXV9_9MAGN SubName: Full=Uncharacterized protein {ECO:0000313|EMBL:KAF9608960.1};	--	GO:0005829,cytosol; GO:0009536,plastid; GO:0071260,cellular response to mechanical stimulus; GO:0009904,chloroplast accumulation movement; GO:0009903,chloroplast avoidance movement; GO:0008150,biological_process; GO:0009605,response to external stimulus; GO:0009612,response to mechanical stimulus; GO:0009628,response to abiotic stimulus; GO:0009987,cellular process; GO:0050896,response to stimulu…	PF05701.14:Weak chloroplast movement under blue light
IFM89_022021	--	--	hypothetical protein IFM89_022021 [Coptis chinensis]	AUF1_ARATH RecName: Full=F-box protein AUF1 {ECO:0000305}; AltName: Full=F-box protein At1g78100 {ECO:0000305}; AltName: Full=Protein AUXIN UP-REGULATED F-BOX PROTEIN 1 {ECO:0000303|PubMed:21653785};	A0A835I302_9MAGN SubName: Full=Uncharacterized protein {ECO:0000313|EMBL:KAF9610351.1};	--	GO:0005634,nucleus; GO:0010541,acropetal auxin transport; GO:0010540,basipetal auxin transport; GO:0009736,cytokinin-activated signaling pathway; GO:0016567,protein ubiquitination; GO:0006810,transport; GO:0008150,biological_process; GO:0009914,hormone transport; GO:0009926,auxin polar transport; GO:0010817,regulation of hormone levels; GO:0051179,localization; GO:0051234,establishment of localiz…	PF12937.10:F-box-like
IFM89_032015	K03122 transcription initiation factor TFIIA large subunit | (RefSeq) uncharacterized protein LOC114825099 (A)	ko03022: Basal transcription factors	hypothetical protein IFM89_032015 [Coptis chinensis]	--	A0A835H1V5_9MAGN RecName: Full=PB1 domain-containing protein {ECO:0000259|SMART:SM00666};	--	--	PF00564.27:PB1 domain
IFM89_020308	K00963 UTP--glucose-1-phosphate uridylyltransferase [EC:2.7.7.9] | (RefSeq) UTP--glucose-1-phosphate uridylyltransferase (A)	ko00040: Pentose and glucuronate interconversions; ko00052: Galactose metabolism; ko00500: Starch and sucrose metabolism; ko00520: Amino sugar and nucleotide sugar metabolism; ko01100: Metabolic pathways; ko01110: Biosynthesis of secondary metabolites; ko01240: Biosynthesis of cofactors; ko01250: Biosynthesis of nucleotide sugars	hypothetical protein IFM89_020308, partial [Coptis chinensis]	PGLR_VITVI RecName: Full=Probable polygalacturonase; Short=PG {ECO:0000250|UniProtKB:Q7M1E7}; EC=3.2.1.15; AltName: Full=Pectinase {ECO:0000250|UniProtKB:Q7M1E7};	A0A835HQZ4_9MAGN RecName: Full=Pectate_lyase_3 domain-containing protein {ECO:0000259|Pfam:PF12708}; Flags: Fragment;	--	GO:0016021,integral component of membrane; GO:0004650,polygalacturonase activity; GO:0005975,carbohydrate metabolic process; GO:0003674,molecular_function; GO:0003824,catalytic activity; GO:0004553,hydrolase activity, hydrolyzing O-glycosyl compounds; GO:0016787,hydrolase activity; GO:0016798,hydrolase activity, acting on glycosyl bonds; GO:0008150,biological_process; GO:0008152,metabolic process…	PF00295.20:Glycosyl hydrolases family 28
IFM89_021954	K00454 lipoxygenase [EC:1.13.11.12] | (RefSeq) linoleate 13S-lipoxygenase 2-1, chloroplastic-like (A)	ko00591: Linoleic acid metabolism; ko00592: alpha-Linolenic acid metabolism; ko01100: Metabolic pathways; ko01110: Biosynthesis of secondary metabolites	hypothetical protein IFM89_021954 [Coptis chinensis]	LOX21_SOLTU RecName: Full=Linoleate 13S-lipoxygenase 2-1, chloroplastic {ECO:0000303|PubMed:8702864}; EC=1.13.11.12 {ECO:0000269|PubMed:11675388, ECO:0000269|PubMed:8702864}; AltName: Full=Lipoxygenase 2-1 {ECO:0000303|PubMed:8702864}; Flags: Precursor;	A0A835HEI1_9MAGN RecName: Full=Lipoxygenase {ECO:0000256|RuleBase:RU003975}; EC=1.13.11.- {ECO:0000256|RuleBase:RU003975};	--	GO:0009570,chloroplast stroma; GO:0009534,chloroplast thylakoid; GO:0016165,linoleate 13S-lipoxygenase activity; GO:0046872,metal ion binding; GO:0016702,oxidoreductase activity, acting on single donors with incorporation of molecular oxygen, incorporation of two atoms of oxygen; GO:0006633,fatty acid biosynthetic process; GO:0010597,green leaf volatile biosynthetic process; GO:0034440,lipid oxid…	PF00305.22:Lipoxygenase
IFM89_011008	K09060 plant G-box-binding factor | (RefSeq) G-box-binding factor 1 isoform X1 (A)	--	hypothetical protein IFM89_011008 [Coptis chinensis]	GBF1_ARATH RecName: Full=G-box-binding factor 1; Short=AtGBF1; AltName: Full=bZIP transcription factor 41; Short=AtbZIP41;	A0A835M5D1_9MAGN RecName: Full=BZIP domain-containing protein {ECO:0000259|PROSITE:PS50217};	--	GO:0005737,cytoplasm; GO:0005634,nucleus; GO:0003700,DNA-binding transcription factor activity; GO:0043565,sequence-specific DNA binding; GO:0000976,transcription cis-regulatory region binding; GO:0006355,regulation of DNA-templated transcription; GO:0003674,molecular_function; GO:0140110,transcription regulator activity; GO:0003676,nucleic acid binding; GO:0003677,DNA binding; GO:0005488,binding…	PF07777.14:G-box binding protein MFMR
IFM89_036526	K22390 acid phosphatase type 7 | (RefSeq) purple acid phosphatase 22-like (A)	--	hypothetical protein IFM89_036526 [Coptis chinensis]	PPA22_ARATH RecName: Full=Purple acid phosphatase 22; EC=3.1.3.2; Flags: Precursor;	A0A835HB75_9MAGN RecName: Full=Purple acid phosphatase {ECO:0000256|RuleBase:RU361203}; EC=3.1.3.2 {ECO:0000256|RuleBase:RU361203};	Purple acid phosphatase	GO:0005576,extracellular region; GO:0003993,acid phosphatase activity; GO:0046872,metal ion binding; GO:0003674,molecular_function; GO:0003824,catalytic activity; GO:0016787,hydrolase activity; GO:0016788,hydrolase activity, acting on ester bonds; GO:0016791,phosphatase activity; GO:0042578,phosphoric ester hydrolase activity; GO:0005488,binding; GO:0043167,ion binding; GO:0043169,cation binding;…	PF14008.9:Iron/zinc purple acid phosphatase-like protein C
IFM89_010682	K00789 S-adenosylmethionine synthetase [EC:2.5.1.6] | (RefSeq) S-adenosylmethionine synthase 1 (A)	ko00270: Cysteine and methionine metabolism; ko00999: Biosynthesis of various plant secondary metabolites; ko01100: Metabolic pathways; ko01110: Biosynthesis of secondary metabolites; ko01230: Biosynthesis of amino acids; ko01240: Biosynthesis of cofactors	hypothetical protein IFM89_010682 [Coptis chinensis]	METK1_VITVI RecName: Full=S-adenosylmethionine synthase 1; Short=AdoMet synthase 1; EC=2.5.1.6 {ECO:0000250|UniProtKB:Q96551}; AltName: Full=Methionine adenosyltransferase 1; Short=MAT 1;	A0A835HE09_9MAGN RecName: Full=S-adenosylmethionine synthase {ECO:0000256|RuleBase:RU000541}; EC=2.5.1.6 {ECO:0000256|RuleBase:RU000541};	S-adenosylmethionine synthetase	GO:0005829,cytosol; GO:0005524,ATP binding; GO:0046872,metal ion binding; GO:0004478,methionine adenosyltransferase activity; GO:0006730,one-carbon metabolic process; GO:0006556,S-adenosylmethionine biosynthetic process; GO:0000166,nucleotide binding; GO:0003674,molecular_function; GO:0005488,binding; GO:0017076,purine nucleotide binding; GO:0030554,adenyl nucleotide binding; GO:0032553,ribonucle…	PF02773.19:S-adenosylmethionine synthetase, C-terminal domain
IFM89_006662	K02958 small subunit ribosomal protein S15e | (RefSeq) uncharacterized protein LOC110912550 (A)	ko03010: Ribosome	hypothetical protein IFM89_006662 [Coptis chinensis]	--	A0A835M962_9MAGN RecName: Full=C2 NT-type domain-containing protein {ECO:0000259|PROSITE:PS51840};	--	--	PF10358.12:N-terminal C2 in EEIG1 and EHBP1 proteins
IFM89_000111	--	--	hypothetical protein IFM89_000111 [Coptis chinensis]	IQD33_ARATH RecName: Full=Protein IQ-DOMAIN 33 {ECO:0000303|PubMed:16368012}; Short=AtIQD33 {ECO:0000303|PubMed:16368012};	A0A835LYG0_9MAGN SubName: Full=Uncharacterized protein {ECO:0000313|EMBL:KAF9607764.1};	--	GO:0005634,nucleus; GO:0005516,calmodulin binding; GO:0003674,molecular_function; GO:0005488,binding; GO:0005515,protein binding; GO:0005575,cellular_component; GO:0005622,intracellular anatomical structure; GO:0043226,organelle; GO:0043227,membrane-bounded organelle; GO:0043229,intracellular organelle; GO:0043231,intracellular membrane-bounded organelle; GO:0110165,cellular anatomical entity	PF00612.30:IQ calmodulin-binding motif
IFM89_012538	K22856 EEF1A lysine methyltransferase 2 [EC:2.1.1.-] | (RefSeq) EEF1A lysine methyltransferase 2-like (A)	--	hypothetical protein IFM89_012538 [Coptis chinensis]	--	A0A835HLZ1_9MAGN RecName: Full=Protein-lysine N-methyltransferase IFM89_012538 {ECO:0000256|HAMAP-Rule:MF_03188}; EC=2.1.1.- {ECO:0000256|HAMAP-Rule:MF_03188};	Methyltransferases	GO:0005737,cytoplasm; GO:0016279,protein-lysine N-methyltransferase activity; GO:0018022,peptidyl-lysine methylation; GO:0003674,molecular_function; GO:0003824,catalytic activity; GO:0008168,methyltransferase activity; GO:0008170,N-methyltransferase activity; GO:0008276,protein methyltransferase activity; GO:0008757,S-adenosylmethionine-dependent methyltransferase activity; GO:0016278,lysine N-me…	PF13847.9:Methyltransferase domain
novel.8045	K01285 lysosomal Pro-X carboxypeptidase [EC:3.4.16.2] | (RefSeq) lysosomal Pro-X carboxypeptidase-like (A)	--	hypothetical protein IFM89_024851 [Coptis chinensis]	CSLG3_ARATH RecName: Full=Cellulose synthase-like protein G3; Short=AtCslG3; EC=2.4.1.-;	A0A835HMB1_9MAGN SubName: Full=Uncharacterized protein {ECO:0000313|EMBL:KAF9602084.1};	FOG: Transposon-encoded proteins with TYA, reverse transcriptase, integrase domains in various combinations	GO:0000139,Golgi membrane; GO:0016021,integral component of membrane; GO:0005886,plasma membrane; GO:0016760,cellulose synthase (UDP-forming) activity; GO:0051753,mannan synthase activity; GO:0071555,cell wall organization; GO:0030244,cellulose biosynthetic process; GO:0009833,plant-type primary cell wall biogenesis; GO:0003674,molecular_function; GO:0003824,catalytic activity; GO:0008194,UDP-gly…	PF03552.17:Cellulose synthase
IFM89_003004	K13096 splicing factor 4 | (RefSeq) SURP and G-patch domain-containing protein 1-like protein (A)	--	hypothetical protein IFM89_003004 [Coptis chinensis]	SUGP1_ARATH RecName: Full=SURP and G-patch domain-containing protein 1-like protein; AltName: Full=Splicing factor 4-like protein; Short=SF4-like protein;	A0A835IQT7_9MAGN SubName: Full=Uncharacterized protein {ECO:0000313|EMBL:KAF9623420.1};	Predicted RNA-binding protein, contains SWAP and G-patch domains	GO:0005654,nucleoplasm; GO:0003723,RNA binding; GO:0006397,mRNA processing; GO:0008380,RNA splicing; GO:0003674,molecular_function; GO:0003676,nucleic acid binding; GO:0005488,binding; GO:0097159,organic cyclic compound binding; GO:1901363,heterocyclic compound binding; GO:0006139,nucleobase-containing compound metabolic process; GO:0006396,RNA processing; GO:0006725,cellular aromatic compound me…	PF00098.26:Zinc knuckle
IFM89_011005	--	--	hypothetical protein IFM89_011005 [Coptis chinensis]	JAC1_ARATH RecName: Full=J domain-containing protein required for chloroplast accumulation response 1;	A0A835IJT4_9MAGN SubName: Full=Uncharacterized protein {ECO:0000313|EMBL:KAF9620270.1};	Auxilin-like protein and related proteins containing DnaJ domain	GO:0005737,cytoplasm; GO:0043231,intracellular membrane-bounded organelle; GO:0005739,mitochondrion; GO:0031982,vesicle; GO:0030276,clathrin binding; GO:0007015,actin filament organization; GO:0071483,cellular response to blue light; GO:0009904,chloroplast accumulation movement; GO:0009903,chloroplast avoidance movement; GO:0072318,clathrin coat disassembly; GO:0072583,clathrin-dependent endocyto…	--
IFM89_025610	K18819 inositol 3-alpha-galactosyltransferase [EC:2.4.1.123] | (RefSeq) galactinol synthase 2-like (A)	ko00052: Galactose metabolism; ko01100: Metabolic pathways	hypothetical protein IFM89_025610 [Coptis chinensis]	GOLS2_SOLLC RecName: Full=Galactinol synthase 2; Short=GolS-2; Short=SlGolS2; EC=2.4.1.123;	A0A835H5D8_9MAGN RecName: Full=Hexosyltransferase {ECO:0000256|RuleBase:RU362027}; EC=2.4.1.- {ECO:0000256|RuleBase:RU362027};	Glycosyl transferase, family 8 - glycogenin	GO:0005737,cytoplasm; GO:0016757,glycosyltransferase activity; GO:0047216,inositol 3-alpha-galactosyltransferase activity; GO:0046872,metal ion binding; GO:0006012,galactose metabolic process; GO:0003674,molecular_function; GO:0003824,catalytic activity; GO:0016740,transferase activity; GO:0008194,UDP-glycosyltransferase activity; GO:0008378,galactosyltransferase activity; GO:0016758,hexosyltrans…	PF01501.23:Glycosyl transferase family 8
IFM89_015797	K07213 copper chaperone | (RefSeq) copper transport protein CCH-like (A)	--	hypothetical protein IFM89_015797 [Coptis chinensis]	HIP35_ARATH RecName: Full=Heavy metal-associated isoprenylated plant protein 35 {ECO:0000303|PubMed:21072340, ECO:0000303|PubMed:23368984}; Short=AtHIP35 {ECO:0000303|PubMed:21072340, ECO:0000303|PubMed:23368984}; Flags: Precursor;	A0A835IL48_9MAGN RecName: Full=HMA domain-containing protein {ECO:0000259|PROSITE:PS50846};	Copper chaperone	GO:0046872,metal ion binding; GO:0003674,molecular_function; GO:0005488,binding; GO:0043167,ion binding; GO:0043169,cation binding	PF00403.29:Heavy-metal-associated domain
IFM89_019951	K14826 FK506-binding nuclear protein [EC:5.2.1.8] | (RefSeq) uncharacterized protein LOC107008897 isoform X1 (A)	--	hypothetical protein IFM89_019951 [Coptis chinensis]	STKLD_ARATH RecName: Full=Probable transcription factor At1g61730 {ECO:0000305}; AltName: Full=Storekeeper-like protein At1g61730 {ECO:0000305};	A0A835HIP4_9MAGN SubName: Full=Uncharacterized protein {ECO:0000313|EMBL:KAF9597583.1};	--	GO:0005730,nucleolus; GO:0005634,nucleus; GO:0000976,transcription cis-regulatory region binding; GO:0019760,glucosinolate metabolic process; GO:0006355,regulation of DNA-templated transcription; GO:0001067,transcription regulatory region nucleic acid binding; GO:0003674,molecular_function; GO:0003676,nucleic acid binding; GO:0003677,DNA binding; GO:0003690,double-stranded DNA binding; GO:0005488…	PF04504.17:Protein of unknown function, DUF573
IFM89_001641	K20890 xylan alpha-glucuronosyltransferase [EC:2.4.1.-] | (RefSeq) UDP-glucuronate:xylan alpha-glucuronosyltransferase 1-like (A)	--	hypothetical protein IFM89_001641 [Coptis chinensis]	--	A0A835LLU0_9MAGN RecName: Full=PGG domain-containing protein {ECO:0000259|Pfam:PF13962};	FOG: Ankyrin repeat	GO:0016021,integral component of membrane; GO:0005575,cellular_component; GO:0016020,membrane; GO:0031224,intrinsic component of membrane; GO:0110165,cellular anatomical entity	PF13962.9:Domain of unknown function
IFM89_009002	K13051 L-asparaginase / beta-aspartyl-peptidase [EC:3.5.1.1 3.4.19.5] | (RefSeq) probable isoaspartyl peptidase/L-asparaginase 2 (A)	ko00250: Alanine, aspartate and glutamate metabolism; ko00460: Cyanoamino acid metabolism; ko01100: Metabolic pathways; ko01110: Biosynthesis of secondary metabolites	hypothetical protein IFM89_009002 [Coptis chinensis]	ASPGB_ARATH RecName: Full=Probable isoaspartyl peptidase/L-asparaginase 2; EC=3.4.19.5; AltName: Full=L-asparagine amidohydrolase 2; Contains: RecName: Full=Isoaspartyl peptidase/L-asparaginase 2 subunit alpha; Contains: RecName: Full=Isoaspartyl peptidase/L-asparaginase 2 subunit beta; Flags: Precursor;	A0A835HIS9_9MAGN SubName: Full=Uncharacterized protein {ECO:0000313|EMBL:KAF9600406.1};	Asparaginase	GO:0005737,cytoplasm; GO:0004067,asparaginase activity; GO:0008798,beta-aspartyl-peptidase activity; GO:0016540,protein autoprocessing; GO:0003674,molecular_function; GO:0003824,catalytic activity; GO:0016787,hydrolase activity; GO:0016810,hydrolase activity, acting on carbon-nitrogen (but not peptide) bonds; GO:0016811,hydrolase activity, acting on carbon-nitrogen (but not peptide) bonds, in lin…	PF01112.21:Asparaginase
IFM89_038392	K17604 zinc finger SWIM domain-containing protein 3 | (RefSeq) protein FAR1-RELATED SEQUENCE 5 isoform X1 (A)	--	hypothetical protein IFM89_038392 [Coptis chinensis]	NIC2_ARATH RecName: Full=Nicotinamidase 2 {ECO:0000305}; Short=AtNIC2 {ECO:0000303|PubMed:17587307}; EC=3.5.1.19 {ECO:0000269|PubMed:17587307}; AltName: Full=Nicotinamide deamidase 2;	A0A835LDQ2_9MAGN RecName: Full=Isochorismatase domain-containing protein {ECO:0000259|Pfam:PF00857};	--	GO:0008936,nicotinamidase activity; GO:0019674,NAD metabolic process; GO:0019363,pyridine nucleotide biosynthetic process; GO:0003674,molecular_function; GO:0003824,catalytic activity; GO:0016787,hydrolase activity; GO:0016810,hydrolase activity, acting on carbon-nitrogen (but not peptide) bonds; GO:0016811,hydrolase activity, acting on carbon-nitrogen (but not peptide) bonds, in linear amides; G…	PF00857.23:Isochorismatase family
novel.3904	--	--	hypothetical protein IFM89_008116, partial [Coptis chinensis]	--	A0A835IZ26_9MAGN SubName: Full=Uncharacterized protein {ECO:0000313|EMBL:KAF9624178.1}; Flags: Fragment;	--	--	PF07172.14:Glycine rich protein family
IFM89_031645	K03327 multidrug resistance protein, MATE family | (RefSeq) protein DETOXIFICATION 29-like (A)	--	hypothetical protein IFM89_031645 [Coptis chinensis]	DTX29_ARATH RecName: Full=Protein DETOXIFICATION 29 {ECO:0000303|PubMed:11739388}; Short=AtDTX29 {ECO:0000303|PubMed:11739388}; AltName: Full=Multidrug and toxic compound extrusion protein 29 {ECO:0000305}; Short=MATE protein 29 {ECO:0000305};	A0A835IZC6_9MAGN RecName: Full=Protein DETOXIFICATION {ECO:0000256|RuleBase:RU004914}; AltName: Full=Multidrug and toxic compound extrusion protein {ECO:0000256|RuleBase:RU004914};	Uncharacterized membrane protein, predicted efflux pump	GO:0016021,integral component of membrane; GO:0016020,membrane; GO:0000325,plant-type vacuole; GO:0005774,vacuolar membrane; GO:0005773,vacuole; GO:0015297,antiporter activity; GO:0022857,transmembrane transporter activity; GO:0042910,xenobiotic transmembrane transporter activity; GO:1990961,xenobiotic detoxification by transmembrane export across the plasma membrane; GO:0003674,molecular_functio…	PF01554.21:MatE
IFM89_036586	K09422 transcription factor MYB, plant | (RefSeq) transcription factor AS1-like (A)	--	hypothetical protein IFM89_036586 [Coptis chinensis]	AS1_ARATH RecName: Full=Transcription factor AS1 {ECO:0000303|PubMed:11140682}; AltName: Full=Myb-related protein 91 {ECO:0000303|PubMed:9839469}; Short=AtMYB91 {ECO:0000303|PubMed:9839469}; AltName: Full=Protein ASYMMETRIC LEAVES 1 {ECO:0000303|PubMed:11140682}; AltName: Full=Protein PHANTASTICA {ECO:0000303|PubMed:10102816}; Short=AtPHAN {ECO:0000303|PubMed:10102816};	A0A835LKT9_9MAGN SubName: Full=Uncharacterized protein {ECO:0000313|EMBL:KAF9599288.1};	Transcription factor, Myb superfamily	GO:0000793,condensed chromosome; GO:0005730,nucleolus; GO:0005634,nucleus; GO:0003677,DNA binding; GO:0003700,DNA-binding transcription factor activity; GO:0042802,identical protein binding; GO:0042803,protein homodimerization activity; GO:0000976,transcription cis-regulatory region binding; GO:0008356,asymmetric cell division; GO:0042742,defense response to bacterium; GO:0050832,defense response…	PF00249.34:Myb-like DNA-binding domain
IFM89_011528	K17686 P-type Cu+ transporter [EC:7.2.2.8] | (RefSeq) copper-transporting ATPase HMA5-like (A)	ko04016: MAPK signaling pathway - plant	hypothetical protein IFM89_011528 [Coptis chinensis]	NFD4_ARATH RecName: Full=Protein NUCLEAR FUSION DEFECTIVE 4 {ECO:0000303|PubMed:16698901};	A0A835ISV6_9MAGN SubName: Full=Uncharacterized protein {ECO:0000313|EMBL:KAF9624485.1};	--	GO:0016021,integral component of membrane; GO:0016020,membrane; GO:0005739,mitochondrion; GO:0000741,karyogamy; GO:0010197,polar nucleus fusion; GO:0009651,response to salt stress; GO:0006996,organelle organization; GO:0006997,nucleus organization; GO:0008150,biological_process; GO:0009987,cellular process; GO:0016043,cellular component organization; GO:0048284,organelle fusion; GO:0071840,cellul…	PF06813.16:Nodulin-like
novel.32	--	--	--	--	--	--	--	--
IFM89_035040	K01859 chalcone isomerase [EC:5.5.1.6] | (RefSeq) chalcone--flavonone isomerase (A)	ko00941: Flavonoid biosynthesis; ko01100: Metabolic pathways; ko01110: Biosynthesis of secondary metabolites	hypothetical protein IFM89_035040 [Coptis chinensis]	CFI_PYRCO RecName: Full=Chalcone--flavanone isomerase; Short=Chalcone isomerase; EC=5.5.1.6;	A0A835LKF7_9MAGN RecName: Full=Chalcone-flavonone isomerase family protein {ECO:0000256|RuleBase:RU361158};	--	GO:0045430,chalcone isomerase activity; GO:0009813,flavonoid biosynthetic process; GO:0003674,molecular_function; GO:0003824,catalytic activity; GO:0016853,isomerase activity; GO:0016872,intramolecular lyase activity; GO:0008150,biological_process; GO:0008152,metabolic process; GO:0009058,biosynthetic process; GO:0009812,flavonoid metabolic process; GO:0071704,organic substance metabolic process;…	PF02431.18:Chalcone-flavanone isomerase
IFM89_003647	K01866 tyrosyl-tRNA synthetase [EC:6.1.1.1] | (RefSeq) uncharacterized LOC105775527 (A)	ko00970: Aminoacyl-tRNA biosynthesis	hypothetical protein IFM89_003647 [Coptis chinensis]	PIRL5_ORYSJ RecName: Full=Plant intracellular Ras-group-related LRR protein 5; AltName: Full=Intracellular Ras-group-related LRR protein 5; Short=OsIRL5;	A0A835ITM8_9MAGN SubName: Full=Uncharacterized protein {ECO:0000313|EMBL:KAF9623640.1};	FOG: Leucine rich repeat	GO:0009416,response to light stimulus; GO:0008150,biological_process; GO:0009314,response to radiation; GO:0009628,response to abiotic stimulus; GO:0050896,response to stimulus	PF13855.9:Leucine rich repeat
IFM89_020846	--	--	hypothetical protein IFM89_020846 [Coptis chinensis]	MACP1_ARATH RecName: Full=MACPF domain-containing protein At1g14780;	A0A835IWT9_9MAGN RecName: Full=MACPF domain-containing protein {ECO:0000259|PROSITE:PS51412};	--	GO:0009626,plant-type hypersensitive response; GO:2000031,regulation of salicylic acid mediated signaling pathway; GO:0002376,immune system process; GO:0006950,response to stress; GO:0006952,defense response; GO:0006955,immune response; GO:0008150,biological_process; GO:0008219,cell death; GO:0009605,response to external stimulus; GO:0009607,response to biotic stimulus; GO:0009987,cellular proces…	PF01823.22:MAC/Perforin domain
IFM89_018830	K05391 cyclic nucleotide gated channel, plant | (RefSeq) probable cyclic nucleotide-gated ion channel 5 isoform X1 (A)	ko04626: Plant-pathogen interaction	hypothetical protein IFM89_018830 [Coptis chinensis]	CNGC6_ARATH RecName: Full=Probable cyclic nucleotide-gated ion channel 6; Short=AtCNGC6; AltName: Full=Cyclic nucleotide- and calmodulin-regulated ion channel 6;	A0A835GYC5_9MAGN RecName: Full=Ion_trans domain-containing protein {ECO:0000259|Pfam:PF00520};	K+-channel ERG and related proteins, contain PAS/PAC sensor domain	GO:0071944,cell periphery; GO:0016021,integral component of membrane; GO:0005886,plasma membrane; GO:0035618,root hair; GO:0005262,calcium channel activity; GO:0005516,calmodulin binding; GO:0030552,cAMP binding; GO:0030553,cGMP binding; GO:0005223,intracellular cGMP-activated cation channel activity; GO:0005249,voltage-gated potassium channel activity; GO:0009408,response to heat; GO:0003674,mol…	PF00520.34:Ion transport protein
IFM89_030396	K00660 chalcone synthase [EC:2.3.1.74] | (RefSeq) chalcone synthase-like (A)	ko00941: Flavonoid biosynthesis; ko00960: Tropane, piperidine and pyridine alkaloid biosynthesis; ko01100: Metabolic pathways; ko01110: Biosynthesis of secondary metabolites; ko04712: Circadian rhythm - plant	hypothetical protein IFM89_030396 [Coptis chinensis]	CHSY_VITVI RecName: Full=Chalcone synthase; EC=2.3.1.74; AltName: Full=Naringenin-chalcone synthase;	A0A835HYY6_9MAGN SubName: Full=Uncharacterized protein {ECO:0000313|EMBL:KAF9606977.1};	--	GO:0102128,chalcone synthase activity; GO:0016210,naringenin-chalcone synthase activity; GO:0009813,flavonoid biosynthetic process; GO:0003674,molecular_function; GO:0003824,catalytic activity; GO:0016740,transferase activity; GO:0016746,acyltransferase activity; GO:0016747,acyltransferase activity, transferring groups other than amino-acyl groups; GO:0008150,biological_process; GO:0008152,metabo…	PF00195.22:Chalcone and stilbene synthases, N-terminal domain
IFM89_026391	K10666 E3 ubiquitin-protein ligase RNF5 [EC:2.3.2.27] | (RefSeq) E3 ubiquitin-protein ligase RMA1H1-like (A)	ko04141: Protein processing in endoplasmic reticulum	hypothetical protein IFM89_026391 [Coptis chinensis]	RMA1_CAPAN RecName: Full=E3 ubiquitin-protein ligase RMA1H1; EC=2.3.2.27; AltName: Full=Protein RING membrane-anchor 1 homolog 1; AltName: Full=RING-type E3 ubiquitin transferase RMA1H1 {ECO:0000305};	A0A835I3Q1_9MAGN RecName: Full=RING-type E3 ubiquitin transferase {ECO:0000256|ARBA:ARBA00012483}; EC=2.3.2.27 {ECO:0000256|ARBA:ARBA00012483};	Predicted E3 ubiquitin ligase	GO:0005789,endoplasmic reticulum membrane; GO:0016021,integral component of membrane; GO:0046872,metal ion binding; GO:0061630,ubiquitin protein ligase activity; GO:0004842,ubiquitin-protein transferase activity; GO:0043161,proteasome-mediated ubiquitin-dependent protein catabolic process; GO:0016567,protein ubiquitination; GO:0009409,response to cold; GO:0009723,response to ethylene; GO:0006970,…	PF00097.28:Zinc finger, C3HC4 type (RING finger)
IFM89_024738	K01262 Xaa-Pro aminopeptidase [EC:3.4.11.9] | (RefSeq) probable Xaa-Pro aminopeptidase P (A)	--	hypothetical protein IFM89_024738 [Coptis chinensis]	AMPP2_ARATH RecName: Full=Aminopeptidase P2 {ECO:0000303|PubMed:11891249}; Short=AtAPP2 {ECO:0000303|PubMed:11891249}; EC=3.4.11.9 {ECO:0000250|UniProtKB:F4JQH3}; Flags: Precursor;	A0A835H808_9MAGN SubName: Full=Uncharacterized protein {ECO:0000313|EMBL:KAF9593734.1};	Xaa-Pro aminopeptidase	GO:0009507,chloroplast; GO:0009570,chloroplast stroma; GO:0005829,cytosol; GO:0046872,metal ion binding; GO:0070006,metalloaminopeptidase activity; GO:0006508,proteolysis; GO:0003674,molecular_function; GO:0005488,binding; GO:0043167,ion binding; GO:0043169,cation binding; GO:0003824,catalytic activity; GO:0004177,aminopeptidase activity; GO:0008233,peptidase activity; GO:0008235,metalloexopeptid…	PF16189.8:Creatinase/Prolidase N-terminal domain
IFM89_017557	K22683 aspartyl protease family protein [EC:3.4.23.-] | (RefSeq) aspartyl protease family protein 2-like (A)	--	hypothetical protein IFM89_017557 [Coptis chinensis]	GIP2_NICBE RecName: Full=Probable aspartic proteinase GIP2 {ECO:0000305}; EC=3.4.23.- {ECO:0000305}; AltName: Full=Glucanase inhibitor protein 2 {ECO:0000303|PubMed:28082413}; Short=NbGIP2 {ECO:0000303|PubMed:28082413}; Flags: Precursor;	A0A835HWB1_9MAGN RecName: Full=Peptidase A1 domain-containing protein {ECO:0000259|PROSITE:PS51767};	Aspartyl protease	GO:0048046,apoplast; GO:0004190,aspartic-type endopeptidase activity; GO:0006952,defense response; GO:0006508,proteolysis; GO:0003674,molecular_function; GO:0003824,catalytic activity; GO:0004175,endopeptidase activity; GO:0008233,peptidase activity; GO:0016787,hydrolase activity; GO:0070001,aspartic-type peptidase activity; GO:0140096,catalytic activity, acting on a protein; GO:0006950,response …	PF14543.9:Xylanase inhibitor N-terminal
IFM89_002575	K07565 60S ribosome subunit biogenesis protein NIP7 | (RefSeq) 60S ribosome subunit biogenesis protein NIP7 homolog (A)	--	hypothetical protein IFM89_002575 [Coptis chinensis]	--	A0A835HKS2_9MAGN RecName: Full=PUA domain-containing protein {ECO:0000259|SMART:SM00359};	Ribosome biogenesis protein NIP7	GO:0005730,nucleolus; GO:0003723,RNA binding; GO:0042255,ribosome assembly; GO:0003674,molecular_function; GO:0003676,nucleic acid binding; GO:0005488,binding; GO:0097159,organic cyclic compound binding; GO:1901363,heterocyclic compound binding; GO:0006996,organelle organization; GO:0008150,biological_process; GO:0009987,cellular process; GO:0016043,cellular component organization; GO:0022607,cel…	PF03657.16:UPF0113 PUA domain
IFM89_035318	--	--	hypothetical protein IFM89_035318 [Coptis chinensis]	--	A0A835IJ07_9MAGN SubName: Full=Uncharacterized protein {ECO:0000313|EMBL:KAF9617337.1};	--	--	--
IFM89_029133	K14505 cyclin D3, plant | (RefSeq) cyclin-D3-1-like (A)	ko04075: Plant hormone signal transduction	hypothetical protein IFM89_029133 [Coptis chinensis]	CCD33_ARATH RecName: Full=Cyclin-D3-3; AltName: Full=G1/S-specific cyclin-D3-3; Short=CycD3;3;	A0A835IUM8_9MAGN RecName: Full=Cyclin N-terminal domain-containing protein {ECO:0000259|PROSITE:PS00292};	G1/S-specific cyclin D	GO:0000307,cyclin-dependent protein kinase holoenzyme complex; GO:0005737,cytoplasm; GO:0005634,nucleus; GO:0016538,cyclin-dependent protein serine/threonine kinase regulator activity; GO:0051301,cell division; GO:0010444,guard mother cell differentiation; GO:0044772,mitotic cell cycle phase transition; GO:0000079,regulation of cyclin-dependent protein serine/threonine kinase activity; GO:0048316…	PF00134.26:Cyclin, N-terminal domain
IFM89_026642	--	--	hypothetical protein IFM89_026642 [Coptis chinensis]	--	A0A835GY52_9MAGN SubName: Full=Uncharacterized protein {ECO:0000313|EMBL:KAF9589640.1};	--	--	--
IFM89_017076	K03098 apolipoprotein D and lipocalin family protein | (RefSeq) temperature-induced lipocalin-1 (A)	--	hypothetical protein IFM89_017076 [Coptis chinensis]	TIL_ARATH RecName: Full=Temperature-induced lipocalin-1 {ECO:0000303|PubMed:18671872}; Short=AtTIL1 {ECO:0000303|PubMed:18671872};	A0A835M0D8_9MAGN RecName: Full=Lipocln_cytosolic_FA-bd_dom domain-containing protein {ECO:0000259|Pfam:PF08212};	Apolipoprotein D/Lipocalin	GO:0009941,chloroplast envelope; GO:0031969,chloroplast membrane; GO:0005737,cytoplasm; GO:0009898,cytoplasmic side of plasma membrane; GO:0005829,cytosol; GO:0005783,endoplasmic reticulum; GO:0005794,Golgi apparatus; GO:0005739,mitochondrion; GO:0000325,plant-type vacuole; GO:0005886,plasma membrane; GO:0009506,plasmodesma; GO:0009536,plastid; GO:0045735,nutrient reservoir activity; GO:0030644,c…	PF08212.15:Lipocalin-like domain
IFM89_018251	K00430 peroxidase [EC:1.11.1.7] | (RefSeq) peroxidase 42 (A)	ko00940: Phenylpropanoid biosynthesis; ko01100: Metabolic pathways; ko01110: Biosynthesis of secondary metabolites	hypothetical protein IFM89_018251 [Coptis chinensis]	PER42_ARATH RecName: Full=Peroxidase 42; Short=Atperox P42; EC=1.11.1.7; AltName: Full=ATP1a/ATP1b; AltName: Full=PRXR1; Flags: Precursor;	A0A835LE11_9MAGN RecName: Full=Peroxidase {ECO:0000256|RuleBase:RU362060}; EC=1.11.1.7 {ECO:0000256|RuleBase:RU362060};	--	GO:0005576,extracellular region; GO:0009505,plant-type cell wall; GO:0020037,heme binding; GO:0046872,metal ion binding; GO:0004601,peroxidase activity; GO:0042744,hydrogen peroxide catabolic process; GO:0006979,response to oxidative stress; GO:0048511,rhythmic process; GO:0003674,molecular_function; GO:0005488,binding; GO:0046906,tetrapyrrole binding; GO:0097159,organic cyclic compound binding; …	PF00141.26:Peroxidase
IFM89_037840	K01051 pectinesterase [EC:3.1.1.11] | (RefSeq) probable pectinesterase/pectinesterase inhibitor 58 (A)	ko00040: Pentose and glucuronate interconversions; ko01100: Metabolic pathways	hypothetical protein IFM89_037840 [Coptis chinensis]	DF1_ARATH RecName: Full=Trihelix transcription factor DF1 {ECO:0000303|PubMed:22735692};	A0A835HSC7_9MAGN RecName: Full=Myb-like domain-containing protein {ECO:0000259|PROSITE:PS50090};	Transcription factor GT-2 and related proteins, contains trihelix DNA-binding/SANT domain	GO:0005634,nucleus; GO:0003700,DNA-binding transcription factor activity; GO:0000976,transcription cis-regulatory region binding; GO:0019760,glucosinolate metabolic process; GO:0010192,mucilage biosynthetic process; GO:0006355,regulation of DNA-templated transcription; GO:0003674,molecular_function; GO:0140110,transcription regulator activity; GO:0001067,transcription regulatory region nucleic ac…	PF13837.9:Myb/SANT-like DNA-binding domain
IFM89_003532	--	--	hypothetical protein IFM89_003532, partial [Coptis chinensis]	HIP7_ARATH RecName: Full=Heavy metal-associated isoprenylated plant protein 7 {ECO:0000303|PubMed:21072340, ECO:0000303|PubMed:23368984}; Short=AtHIP07 {ECO:0000303|PubMed:21072340, ECO:0000303|PubMed:23368984}; AltName: Full=Farnesylated protein 3 {ECO:0000303|PubMed:8837031}; Short=AtFP3 {ECO:0000303|PubMed:8837031}; Flags: Precursor;	A0A835LD85_9MAGN SubName: Full=Uncharacterized protein {ECO:0000313|EMBL:KAF9587514.1}; Flags: Fragment;	Copper chaperone	GO:0046914,transition metal ion binding; GO:0046916,cellular transition metal ion homeostasis; GO:0003674,molecular_function; GO:0005488,binding; GO:0043167,ion binding; GO:0043169,cation binding; GO:0046872,metal ion binding; GO:0006873,cellular ion homeostasis; GO:0006875,cellular metal ion homeostasis; GO:0008150,biological_process; GO:0009987,cellular process; GO:0019725,cellular homeostasis;…	PF00403.29:Heavy-metal-associated domain
IFM89_014745	K01179 endoglucanase [EC:3.2.1.4] | (RefSeq) hypothetical protein (A)	ko00500: Starch and sucrose metabolism; ko01100: Metabolic pathways	hypothetical protein IFM89_014745 [Coptis chinensis]	GUN24_ORYSJ RecName: Full=Endoglucanase 24; EC=3.2.1.4; AltName: Full=Endo-1,4-beta glucanase 24; Flags: Precursor;	A0A835IQ36_9MAGN RecName: Full=Endoglucanase {ECO:0000256|RuleBase:RU361166}; EC=3.2.1.4 {ECO:0000256|RuleBase:RU361166};	--	GO:0005576,extracellular region; GO:0008810,cellulase activity; GO:0071555,cell wall organization; GO:0030245,cellulose catabolic process; GO:0003674,molecular_function; GO:0003824,catalytic activity; GO:0004553,hydrolase activity, hydrolyzing O-glycosyl compounds; GO:0016787,hydrolase activity; GO:0016798,hydrolase activity, acting on glycosyl bonds; GO:0008150,biological_process; GO:0009987,cel…	PF00759.22:Glycosyl hydrolase family 9
IFM89_020629	K16221 transcription factor TCP21 (protein CCA1 HIKING EXPEDITION) | (RefSeq) transcription factor TCP21 isoform X2 (A)	ko04712: Circadian rhythm - plant	hypothetical protein IFM89_020629 [Coptis chinensis]	TCP9_ARATH RecName: Full=Transcription factor TCP9;	A0A835IB33_9MAGN RecName: Full=TCP domain-containing protein {ECO:0000259|PROSITE:PS51369};	--	GO:0005634,nucleus; GO:0003700,DNA-binding transcription factor activity; GO:0043565,sequence-specific DNA binding; GO:0000976,transcription cis-regulatory region binding; GO:1900056,negative regulation of leaf senescence; GO:0008361,regulation of cell size; GO:0006355,regulation of DNA-templated transcription; GO:0048364,root development; GO:0003674,molecular_function; GO:0140110,transcription r…	PF03634.16:TCP family transcription factor
IFM89_016128	K21596 calmodulin-binding transcription activator | (RefSeq) calmodulin-binding transcription activator 4-like (A)	--	hypothetical protein IFM89_016128 [Coptis chinensis]	CMTA4_ARATH RecName: Full=Calmodulin-binding transcription activator 4 {ECO:0000303|PubMed:11925432}; Short=AtCAMTA4 {ECO:0000303|PubMed:11925432}; AltName: Full=AtFIN21 {ECO:0000303|PubMed:11162426}; AltName: Full=Ethylene-induced calmodulin-binding protein 4 {ECO:0000312|EMBL:AAR98747.1}; Short=EICBP4 {ECO:0000312|EMBL:AAR98747.1}; AltName: Full=Ethylene-induced calmodulin-binding protein d {EC…	A0A835HB79_9MAGN RecName: Full=CG-1 domain-containing protein {ECO:0000259|PROSITE:PS51437};	Uncharacterized conserved protein, contains IPT/TIG domain	GO:0005634,nucleus; GO:0005516,calmodulin binding; GO:0003690,double-stranded DNA binding; GO:0003712,transcription coregulator activity; GO:0006357,regulation of transcription by RNA polymerase II; GO:0006355,regulation of DNA-templated transcription; GO:0003674,molecular_function; GO:0005488,binding; GO:0005515,protein binding; GO:0003676,nucleic acid binding; GO:0003677,DNA binding; GO:0097159…	PF03859.19:CG-1 domain
IFM89_021509	--	--	hypothetical protein IFM89_021509 [Coptis chinensis]	--	A0A835HC91_9MAGN RecName: Full=DUF1279 domain-containing protein {ECO:0000259|Pfam:PF06916};	Predicted membrane protein	GO:0016021,integral component of membrane; GO:0005575,cellular_component; GO:0016020,membrane; GO:0031224,intrinsic component of membrane; GO:0110165,cellular anatomical entity	PF06916.16:FAM210A/B-like domain
IFM89_024851	K10999 cellulose synthase A [EC:2.4.1.12] | (RefSeq) cellulose synthase A catalytic subunit 9 [UDP-forming] (A)	--	hypothetical protein IFM89_024851 [Coptis chinensis]	CSLG3_ARATH RecName: Full=Cellulose synthase-like protein G3; Short=AtCslG3; EC=2.4.1.-;	A0A835HMB1_9MAGN SubName: Full=Uncharacterized protein {ECO:0000313|EMBL:KAF9602084.1};	--	GO:0000139,Golgi membrane; GO:0016021,integral component of membrane; GO:0005886,plasma membrane; GO:0016760,cellulose synthase (UDP-forming) activity; GO:0051753,mannan synthase activity; GO:0071555,cell wall organization; GO:0030244,cellulose biosynthetic process; GO:0009833,plant-type primary cell wall biogenesis; GO:0003674,molecular_function; GO:0003824,catalytic activity; GO:0008194,UDP-gly…	PF03552.17:Cellulose synthase
IFM89_035490	K17471 sulfate transporter 3 | (RefSeq) probable sulfate transporter 3.3 (A)	--	hypothetical protein IFM89_035490 [Coptis chinensis]	SUT33_ARATH RecName: Full=Probable sulfate transporter 3.3; AltName: Full=AST91;	A0A835LPL5_9MAGN RecName: Full=STAS domain-containing protein {ECO:0000259|PROSITE:PS50801};	Sulfate/bicarbonate/oxalate exchanger SAT-1 and related transporters (SLC26 family)	GO:0005887,integral component of plasma membrane; GO:0015301,NA; GO:0008271,secondary active sulfate transmembrane transporter activity; GO:0015293,symporter activity; GO:0003674,molecular_function; GO:0005215,transporter activity; GO:0008509,anion transmembrane transporter activity; GO:0015075,ion transmembrane transporter activity; GO:0015103,inorganic anion transmembrane transporter activity; …	PF00916.23:Sulfate permease family
IFM89_013994	K15407 queuine tRNA-ribosyltransferase accessory subunit | (RefSeq) hypothetical protein (A)	--	hypothetical protein IFM89_013994, partial [Coptis chinensis]	--	A0A835MBA2_9MAGN RecName: Full=RING-CH-type domain-containing protein {ECO:0000259|PROSITE:PS51292}; Flags: Fragment;	Protein involved in mRNA turnover and stability	GO:0016021,integral component of membrane; GO:0008270,zinc ion binding; GO:0003674,molecular_function; GO:0005488,binding; GO:0043167,ion binding; GO:0043169,cation binding; GO:0046872,metal ion binding; GO:0046914,transition metal ion binding; GO:0005575,cellular_component; GO:0016020,membrane; GO:0031224,intrinsic component of membrane; GO:0110165,cellular anatomical entity	PF12906.10:RING-variant domain
IFM89_010706	K08999 uncharacterized protein | (RefSeq) hypothetical protein (A)	--	hypothetical protein IFM89_010706 [Coptis chinensis]	BBD1_ARATH RecName: Full=Bifunctional nuclease 1; Short=AtBBD1; EC=3.1.-.-;	A0A835ILA8_9MAGN RecName: Full=BFN domain-containing protein {ECO:0000259|PROSITE:PS51658};	--	GO:0005634,nucleus; GO:0030891,VCB complex; GO:0004518,nuclease activity; GO:0050832,defense response to fungus; GO:0016567,protein ubiquitination; GO:0003674,molecular_function; GO:0003824,catalytic activity; GO:0016787,hydrolase activity; GO:0016788,hydrolase activity, acting on ester bonds; GO:0006950,response to stress; GO:0006952,defense response; GO:0008150,biological_process; GO:0009605,re…	PF02577.17:Bifunctional nuclease domain
IFM89_031861	K14515 EIN3-binding F-box protein | (RefSeq) EIN3-binding F-box protein 1 (A)	ko04016: MAPK signaling pathway - plant; ko04075: Plant hormone signal transduction	hypothetical protein IFM89_031861 [Coptis chinensis]	MAX2A_PETHY RecName: Full=F-box/LRR-repeat MAX2 homolog A; AltName: Full=F-box and leucine-rich repeat MAX2 homolog A;	A0A835GZ16_9MAGN SubName: Full=Uncharacterized protein {ECO:0000313|EMBL:KAF9590206.1};	--	--	PF12799.10:Leucine Rich repeats (2 copies)
IFM89_003654	K09286 EREBP-like factor | (RefSeq) ethylene-responsive transcription factor ERF011-like (A)	--	hypothetical protein IFM89_003654 [Coptis chinensis]	ERF10_ARATH RecName: Full=Ethylene-responsive transcription factor ERF010;	A0A835HKQ4_9MAGN RecName: Full=AP2/ERF domain-containing protein {ECO:0000259|PROSITE:PS51032};	--	GO:0005634,nucleus; GO:0003700,DNA-binding transcription factor activity; GO:0000976,transcription cis-regulatory region binding; GO:0009873,ethylene-activated signaling pathway; GO:0003674,molecular_function; GO:0140110,transcription regulator activity; GO:0001067,transcription regulatory region nucleic acid binding; GO:0003676,nucleic acid binding; GO:0003677,DNA binding; GO:0003690,double-stra…	PF00847.23:AP2 domain
IFM89_030957	K10268 F-box and leucine-rich repeat protein 2/20 | (RefSeq) F-box/LRR-repeat protein 3-like (A)	--	hypothetical protein IFM89_030957 [Coptis chinensis]	MAX2A_PETHY RecName: Full=F-box/LRR-repeat MAX2 homolog A; AltName: Full=F-box and leucine-rich repeat MAX2 homolog A;	A0A835MB59_9MAGN SubName: Full=Uncharacterized protein {ECO:0000313|EMBL:KAF9626110.1};	--	--	PF12799.10:Leucine Rich repeats (2 copies)
IFM89_026392	K03671 thioredoxin 1 | (RefSeq) uncharacterized protein LOC107403706 (A)	--	hypothetical protein IFM89_026392 [Coptis chinensis]	TRXM2_ORYSJ RecName: Full=Thioredoxin M2, chloroplastic; Short=OsTrxm2; AltName: Full=OsTrx14; Flags: Precursor;	A0A835I4E0_9MAGN RecName: Full=Thioredoxin domain-containing protein {ECO:0000259|PROSITE:PS51352};	Thioredoxin-like protein	GO:0009507,chloroplast; GO:0005737,cytoplasm; GO:0016491,oxidoreductase activity; GO:0016671,oxidoreductase activity, acting on a sulfur group of donors, disulfide as acceptor; GO:0015035,protein-disulfide reductase activity; GO:0003674,molecular_function; GO:0003824,catalytic activity; GO:0016667,oxidoreductase activity, acting on a sulfur group of donors; GO:0015036,disulfide oxidoreductase act…	PF00085.23:Thioredoxin
IFM89_006966	K13412 calcium-dependent protein kinase [EC:2.7.11.1] | (RefSeq) calcium-dependent protein kinase 8-like (A)	ko04626: Plant-pathogen interaction	hypothetical protein IFM89_006966 [Coptis chinensis]	CDPKK_ORYSJ RecName: Full=Calcium-dependent protein kinase 20 {ECO:0000305}; Short=OsCDPK20 {ECO:0000305}; Short=OsCPK20 {ECO:0000303|PubMed:15695435}; EC=2.7.11.1 {ECO:0000305};	A0A835HB37_9MAGN SubName: Full=Uncharacterized protein {ECO:0000313|EMBL:KAF9596039.1};	Ca2+/calmodulin-dependent protein kinase, EF-Hand protein superfamily	GO:0005737,cytoplasm; GO:0005634,nucleus; GO:0005886,plasma membrane; GO:0005524,ATP binding; GO:0005509,calcium ion binding; GO:0009931,calcium-dependent protein serine/threonine kinase activity; GO:0005516,calmodulin binding; GO:0004683,calmodulin-dependent protein kinase activity; GO:0106310,protein serine kinase activity; GO:0035556,intracellular signal transduction; GO:0018105,peptidyl-serin…	PF00069.28:Protein kinase domain
IFM89_000076	--	--	hypothetical protein IFM89_000076 [Coptis chinensis]	BH148_ARATH RecName: Full=Transcription factor bHLH148 {ECO:0000303|PubMed:24009530}; AltName: Full=ATBS1 interacting factor 2 {ECO:0000303|PubMed:20023194}; AltName: Full=Basic helix-loop-helix protein 148 {ECO:0000303|PubMed:24009530}; Short=AtbHLH148 {ECO:0000303|PubMed:24009530}; Short=bHLH 148 {ECO:0000303|PubMed:24009530}; AltName: Full=Protein RSA1 INTERACTING TRANSCRIPTION FACTOR 1 {ECO:0…	A0A835IKG9_9MAGN RecName: Full=BHLH domain-containing protein {ECO:0000259|PROSITE:PS50888};	--	GO:0005634,nucleus; GO:0003700,DNA-binding transcription factor activity; GO:0046983,protein dimerization activity; GO:0043565,sequence-specific DNA binding; GO:0000976,transcription cis-regulatory region binding; GO:0006355,regulation of DNA-templated transcription; GO:0042542,response to hydrogen peroxide; GO:0006979,response to oxidative stress; GO:0009651,response to salt stress; GO:0003674,m…	--
IFM89_033080	K11593 eukaryotic translation initiation factor 2C | (RefSeq) protein argonaute PNH1-like (A)	--	hypothetical protein IFM89_033080 [Coptis chinensis]	PNH1_ORYSJ RecName: Full=Protein argonaute PNH1; AltName: Full=Protein PINHEAD homolog 1; Short=OsPNH1;	A0A835IFI8_9MAGN SubName: Full=Uncharacterized protein {ECO:0000313|EMBL:KAF9617010.1};	Translation initiation factor 2C (eIF-2C) and related proteins	GO:0005737,cytoplasm; GO:0004521,endoribonuclease activity; GO:0003723,RNA binding; GO:0048366,leaf development; GO:0035194,post-transcriptional gene silencing by RNA; GO:0019827,stem cell population maintenance; GO:0003674,molecular_function; GO:0003824,catalytic activity; GO:0004518,nuclease activity; GO:0004519,endonuclease activity; GO:0004540,ribonuclease activity; GO:0016787,hydrolase activ…	PF02171.20:Piwi domain
IFM89_006261	K00422 polyphenol oxidase [EC:1.10.3.1] | (RefSeq) polyphenol oxidase, chloroplastic-like (A)	ko00350: Tyrosine metabolism; ko00950: Isoquinoline alkaloid biosynthesis; ko01100: Metabolic pathways; ko01110: Biosynthesis of secondary metabolites	hypothetical protein IFM89_006261 [Coptis chinensis]	PPO_MALDO RecName: Full=Polyphenol oxidase, chloroplastic; Short=PPO; EC=1.10.3.1; AltName: Full=Catechol oxidase; Flags: Precursor;	A0A835LHW4_9MAGN RecName: Full=Tyrosinase_Cu-bd domain-containing protein {ECO:0000259|PROSITE:PS00498};	--	GO:0009543,chloroplast thylakoid lumen; GO:0004097,catechol oxidase activity; GO:0046872,metal ion binding; GO:0046148,pigment biosynthetic process; GO:0003674,molecular_function; GO:0003824,catalytic activity; GO:0004497,monooxygenase activity; GO:0016491,oxidoreductase activity; GO:0016679,oxidoreductase activity, acting on diphenols and related substances as donors; GO:0016682,oxidoreductase a…	PF12143.11:Protein of unknown function (DUF_B2219)
IFM89_018635	K03070 preprotein translocase subunit SecA [EC:7.4.2.8] | (RefSeq) protein translocase subunit SECA1, chloroplastic (A)	ko03060: Protein export	hypothetical protein IFM89_018635 [Coptis chinensis]	SECA_PEA RecName: Full=Protein translocase subunit SecA, chloroplastic {ECO:0000305}; EC=7.4.2.4 {ECO:0000269|PubMed:9342223}; Flags: Precursor;	A0A835H4U2_9MAGN RecName: Full=Protein translocase subunit SecA {ECO:0000256|RuleBase:RU003874};	--	GO:0009570,chloroplast stroma; GO:0009535,chloroplast thylakoid membrane; GO:0005524,ATP binding; GO:0016464,chloroplast protein-transporting ATPase activity; GO:0008320,protein transmembrane transporter activity; GO:0017038,protein import; GO:0006605,protein targeting; GO:0071806,protein transmembrane transport; GO:0000166,nucleotide binding; GO:0003674,molecular_function; GO:0005488,binding; GO…	PF07517.17:SecA DEAD-like domain
IFM89_005863	K01267 aspartyl aminopeptidase [EC:3.4.11.21] | (RefSeq) probable aspartyl aminopeptidase (A)	--	hypothetical protein IFM89_005863 [Coptis chinensis]	--	A0A835LPQ2_9MAGN SubName: Full=Uncharacterized protein {ECO:0000313|EMBL:KAF9600277.1};	FOG: Ankyrin repeat	--	PF12796.10:Ankyrin repeats (3 copies)
IFM89_011292	K10532 heparan-alpha-glucosaminide N-acetyltransferase [EC:2.3.1.78] | (RefSeq) heparan-alpha-glucosaminide N-acetyltransferase-like isoform X1 (A)	ko00531: Glycosaminoglycan degradation; ko01100: Metabolic pathways	hypothetical protein IFM89_011292 [Coptis chinensis]	--	A0A835HQ55_9MAGN RecName: Full=HGSNAT_cat domain-containing protein {ECO:0000259|Pfam:PF07786};	Uncharacterized conserved protein	GO:0016021,integral component of membrane; GO:0005575,cellular_component; GO:0016020,membrane; GO:0031224,intrinsic component of membrane; GO:0110165,cellular anatomical entity	PF07786.15:Heparan-alpha-glucosaminide N-acetyltransferase, catalytic
IFM89_008058	K00688 glycogen phosphorylase [EC:2.4.1.1] | (RefSeq) alpha-1,4 glucan phosphorylase L-2 isozyme, chloroplastic/amyloplastic (A)	ko00500: Starch and sucrose metabolism; ko01100: Metabolic pathways; ko01110: Biosynthesis of secondary metabolites	hypothetical protein IFM89_008058 [Coptis chinensis]	PHSL_IPOBA RecName: Full=Alpha-1,4 glucan phosphorylase L isozyme, chloroplastic/amyloplastic; EC=2.4.1.1; AltName: Full=Starch phosphorylase L; Flags: Precursor;	A0A835IUL1_9MAGN RecName: Full=Alpha-1,4 glucan phosphorylase {ECO:0000256|RuleBase:RU000587}; EC=2.4.1.1 {ECO:0000256|RuleBase:RU000587};	Glycogen phosphorylase	GO:0009501,amyloplast; GO:0009507,chloroplast; GO:0008184,glycogen phosphorylase activity; GO:0102250,linear malto-oligosaccharide phosphorylase activity; GO:0030170,pyridoxal phosphate binding; GO:0102499,SHG alpha-glucan phosphorylase activity; GO:0005975,carbohydrate metabolic process; GO:0003674,molecular_function; GO:0003824,catalytic activity; GO:0004645,1,4-alpha-oligoglucan phosphorylase …	PF00343.23:Carbohydrate phosphorylase
IFM89_018100	K19996 phosphatidylinositol transfer protein SFH5 | (RefSeq) patellin-3 (A)	--	hypothetical protein IFM89_018100 [Coptis chinensis]	PATL3_ARATH RecName: Full=Patellin-3;	A0A835M2U3_9MAGN RecName: Full=CRAL-TRIO domain-containing protein {ECO:0000259|PROSITE:PS50191};	Phosphatidylinositol transfer protein SEC14 and related proteins	GO:0005737,cytoplasm; GO:0005886,plasma membrane; GO:0008289,lipid binding; GO:0007049,cell cycle; GO:0051301,cell division; GO:0003674,molecular_function; GO:0005488,binding; GO:0008150,biological_process; GO:0009987,cellular process; GO:0005575,cellular_component; GO:0005622,intracellular anatomical structure; GO:0110165,cellular anatomical entity; GO:0016020,membrane; GO:0071944,cell periphery	PF00650.23:CRAL/TRIO domain
IFM89_024076	--	--	hypothetical protein IFM89_024076 [Coptis chinensis]	--	A0A835HUJ4_9MAGN SubName: Full=Uncharacterized protein {ECO:0000313|EMBL:KAF9606255.1};	--	--	--
IFM89_012573	K07375 tubulin beta | (RefSeq) tubulin beta chain (A)	ko04145: Phagosome	hypothetical protein IFM89_012573 [Coptis chinensis]	TBB5_MAIZE RecName: Full=Tubulin beta-5 chain; AltName: Full=Beta-5-tubulin;	A0A835H4S9_9MAGN RecName: Full=Tubulin beta chain {ECO:0000256|RuleBase:RU000352};	Beta tubulin	GO:0005737,cytoplasm; GO:0005874,microtubule; GO:0005525,GTP binding; GO:0005200,structural constituent of cytoskeleton; GO:0000226,microtubule cytoskeleton organization; GO:0007017,microtubule-based process; GO:0000278,mitotic cell cycle; GO:0000166,nucleotide binding; GO:0003674,molecular_function; GO:0005488,binding; GO:0017076,purine nucleotide binding; GO:0019001,guanyl nucleotide binding; G…	PF00091.28:Tubulin/FtsZ family, GTPase domain
IFM89_001847	K23280 rhamnogalacturonan I rhamnosyltransferase [EC:2.4.1.351] | (RefSeq) uncharacterized protein At1g04910-like (A)	--	hypothetical protein IFM89_001847 [Coptis chinensis]	OFT11_ARATH RecName: Full=O-fucosyltransferase 11 {ECO:0000305}; Short=O-FucT-11 {ECO:0000305}; EC=2.4.1.- {ECO:0000305}; AltName: Full=O-fucosyltransferase family protein {ECO:0000312|EMBL:ARJ31411.1};	A0A835HJ11_9MAGN RecName: Full=O-fucosyltransferase family protein {ECO:0000256|ARBA:ARBA00030350};	--	GO:0016021,integral component of membrane; GO:0016757,glycosyltransferase activity; GO:0006004,fucose metabolic process; GO:0003674,molecular_function; GO:0003824,catalytic activity; GO:0016740,transferase activity; GO:0005975,carbohydrate metabolic process; GO:0005996,monosaccharide metabolic process; GO:0008150,biological_process; GO:0008152,metabolic process; GO:0019318,hexose metabolic proces…	PF10250.12:GDP-fucose protein O-fucosyltransferase
IFM89_022468	K00759 adenine phosphoribosyltransferase [EC:2.4.2.7] | (RefSeq) adenine phosphoribosyltransferase 5 isoform X1 (A)	ko00230: Purine metabolism; ko01100: Metabolic pathways; ko01232: Nucleotide metabolism	hypothetical protein IFM89_022468 [Coptis chinensis]	APT5_ARATH RecName: Full=Adenine phosphoribosyltransferase 5; Short=AtAPT5; EC=2.4.2.7;	A0A835M937_9MAGN RecName: Full=Adenine phosphoribosyltransferase {ECO:0000256|ARBA:ARBA00011893}; EC=2.4.2.7 {ECO:0000256|ARBA:ARBA00011893};	Adenine phosphoribosyl transferases	GO:0005829,cytosol; GO:0003999,adenine phosphoribosyltransferase activity; GO:0006168,adenine salvage; GO:0044209,AMP salvage; GO:0006166,purine ribonucleoside salvage; GO:0003674,molecular_function; GO:0003824,catalytic activity; GO:0016740,transferase activity; GO:0016757,glycosyltransferase activity; GO:0016763,pentosyltransferase activity; GO:0106130,purine phosphoribosyltransferase activity;…	PF00156.30:Phosphoribosyl transferase domain
IFM89_008462	K24188 cytochrome P450 family 93 subfamily A [EC:1.14.-.-] | (RefSeq) cytochrome P450 93A3-like (A)	--	hypothetical protein IFM89_008462 [Coptis chinensis]	C9B16_SOYBN RecName: Full=Cytochrome P450 93B16 {ECO:0000305}; EC=1.14.19.76 {ECO:0000269|PubMed:20132953}; AltName: Full=Flavone synthase II {ECO:0000303|PubMed:20132953}; Short=GmFNSII {ECO:0000303|PubMed:20132953};	A0A835H4W5_9MAGN SubName: Full=Uncharacterized protein {ECO:0000313|EMBL:KAF9591812.1};	Cytochrome P450 CYP2 subfamily	GO:0016021,integral component of membrane; GO:0016020,membrane; GO:0020037,heme binding; GO:0005506,iron ion binding; GO:0016709,oxidoreductase activity, acting on paired donors, with incorporation or reduction of molecular oxygen, NAD(P)H as one donor, and incorporation of one atom of oxygen; GO:0016717,oxidoreductase activity, acting on paired donors, with oxidation of a pair of donors resultin…	PF00067.25:Cytochrome P450
IFM89_007767	K05280 flavonoid 3'-monooxygenase [EC:1.14.14.82] | (RefSeq) flavonoid 3'-monooxygenase-like (A)	ko00941: Flavonoid biosynthesis; ko00944: Flavone and flavonol biosynthesis; ko01100: Metabolic pathways; ko01110: Biosynthesis of secondary metabolites	hypothetical protein IFM89_007767 [Coptis chinensis]	CYP1_CROXC RecName: Full=Flavonoid 3'-monooxygenase CYP75B137 {ECO:0000305}; EC=1.14.14.82 {ECO:0000269|PubMed:31004005}; AltName: Full=Cytochrome P450 1 {ECO:0000303|PubMed:31004005}; Short=CcCYP1 {ECO:0000303|PubMed:31004005}; AltName: Full=Cytochrome P450 75B137 {ECO:0000303|PubMed:31004005}; AltName: Full=Flavonoid 3'-hydroxylase CYP75B137 {ECO:0000305};	A0A835MEF9_9MAGN SubName: Full=Uncharacterized protein {ECO:0000313|EMBL:KAF9624069.1};	Cytochrome P450 CYP2 subfamily	GO:0016021,integral component of membrane; GO:0016711,flavonoid 3'-monooxygenase activity; GO:0020037,heme binding; GO:0005506,iron ion binding; GO:0009813,flavonoid biosynthetic process; GO:0003674,molecular_function; GO:0003824,catalytic activity; GO:0004497,monooxygenase activity; GO:0016491,oxidoreductase activity; GO:0016705,oxidoreductase activity, acting on paired donors, with incorporatio…	PF00067.25:Cytochrome P450
IFM89_005282	--	--	hypothetical protein IFM89_005282 [Coptis chinensis]	--	A0A835ITX2_9MAGN RecName: Full=C2 domain-containing protein {ECO:0000259|PROSITE:PS50004};	--	--	PF00168.33:C2 domain
IFM89_004668	K01188 beta-glucosidase [EC:3.2.1.21] | (RefSeq) beta-glucosidase 12-like isoform X1 (A)	ko00460: Cyanoamino acid metabolism; ko00500: Starch and sucrose metabolism; ko00999: Biosynthesis of various plant secondary metabolites; ko01100: Metabolic pathways; ko01110: Biosynthesis of secondary metabolites	hypothetical protein IFM89_004668 [Coptis chinensis]	BGL12_ORYSI RecName: Full=Beta-glucosidase 12 {ECO:0000305}; EC=3.2.1.21 {ECO:0000305}; Flags: Precursor;	A0A835I5K0_9MAGN SubName: Full=Uncharacterized protein {ECO:0000313|EMBL:KAF9612965.1};	Beta-glucosidase, lactase phlorizinhydrolase, and related proteins	GO:0005576,extracellular region; GO:0033907,beta-D-fucosidase activity; GO:0004565,beta-galactosidase activity; GO:0008422,beta-glucosidase activity; GO:0102483,scopolin beta-glucosidase activity; GO:0005975,carbohydrate metabolic process; GO:0003674,molecular_function; GO:0003824,catalytic activity; GO:0004553,hydrolase activity, hydrolyzing O-glycosyl compounds; GO:0016787,hydrolase activity; G…	PF00232.21:Glycosyl hydrolase family 1
IFM89_010966	K23678 solute carrier family 66 (lysosomal lysine-arginine transporter), member 1 | (RefSeq) probable vacuolar amino acid transporter YPQ1 (A)	--	hypothetical protein IFM89_010966 [Coptis chinensis]	--	A0A835MDY0_9MAGN SubName: Full=Uncharacterized protein {ECO:0000313|EMBL:KAF9620231.1};	Predicted membrane protein	GO:0016021,integral component of membrane; GO:0005575,cellular_component; GO:0016020,membrane; GO:0031224,intrinsic component of membrane; GO:0110165,cellular anatomical entity	PF04193.17:PQ loop repeat
IFM89_037096	K22772 flavonol-3-O-glucoside L-rhamnosyltransferase [EC:2.4.1.159] | (RefSeq) anthocyanidin 3-O-glucosyltransferase-like (A)	ko00944: Flavone and flavonol biosynthesis; ko01110: Biosynthesis of secondary metabolites	hypothetical protein IFM89_037096, partial [Coptis chinensis]	UFOG_PETHY RecName: Full=Anthocyanidin-3-O-glucoside rhamnosyltransferase {ECO:0000303|PubMed:8130800}; EC=2.4.1.- {ECO:0000305}; AltName: Full=Anthocyanin rhamnosyl transferase {ECO:0000303|PubMed:8130799};	A0A835HST0_9MAGN RecName: Full=Glycosyltransferase {ECO:0000256|RuleBase:RU362057}; EC=2.4.1.- {ECO:0000256|RuleBase:RU362057}; Flags: Fragment;	UDP-glucuronosyl and UDP-glucosyl transferase	GO:0051566,anthocyanidin-3-glucoside rhamnosyltransferase activity; GO:0008194,UDP-glycosyltransferase activity; GO:0009718,anthocyanin-containing compound biosynthetic process; GO:0003674,molecular_function; GO:0003824,catalytic activity; GO:0016740,transferase activity; GO:0016757,glycosyltransferase activity; GO:0016758,hexosyltransferase activity; GO:0008150,biological_process; GO:0008152,met…	PF00201.21:UDP-glucoronosyl and UDP-glucosyl transferase
IFM89_002006	K14432 ABA responsive element binding factor | (RefSeq) ABSCISIC ACID-INSENSITIVE 5-like protein 5 (A)	ko04075: Plant hormone signal transduction	hypothetical protein IFM89_002006 [Coptis chinensis]	AI5L5_ARATH RecName: Full=ABSCISIC ACID-INSENSITIVE 5-like protein 5; AltName: Full=ABA-responsive element-binding protein 1; AltName: Full=Abscisic acid responsive elements-binding factor 2; Short=ABRE-binding factor 2; AltName: Full=bZIP transcription factor 36; Short=AtbZIP36;	A0A835HHW1_9MAGN RecName: Full=BZIP domain-containing protein {ECO:0000259|PROSITE:PS00036};	--	GO:0005634,nucleus; GO:0003677,DNA binding; GO:0003700,DNA-binding transcription factor activity; GO:0009738,abscisic acid-activated signaling pathway; GO:0045893,positive regulation of DNA-templated transcription; GO:0003674,molecular_function; GO:0003676,nucleic acid binding; GO:0005488,binding; GO:0097159,organic cyclic compound binding; GO:1901363,heterocyclic compound binding; GO:0140110,tra…	PF00170.24:bZIP transcription factor
IFM89_029287	K07213 copper chaperone | (RefSeq) copper transport protein ATX1-like (A)	--	hypothetical protein IFM89_029287 [Coptis chinensis]	HIP7_ARATH RecName: Full=Heavy metal-associated isoprenylated plant protein 7 {ECO:0000303|PubMed:21072340, ECO:0000303|PubMed:23368984}; Short=AtHIP07 {ECO:0000303|PubMed:21072340, ECO:0000303|PubMed:23368984}; AltName: Full=Farnesylated protein 3 {ECO:0000303|PubMed:8837031}; Short=AtFP3 {ECO:0000303|PubMed:8837031}; Flags: Precursor;	A0A835HTT1_9MAGN SubName: Full=Uncharacterized protein {ECO:0000313|EMBL:KAF9606830.1};	Copper chaperone	GO:0046914,transition metal ion binding; GO:0046916,cellular transition metal ion homeostasis; GO:0003674,molecular_function; GO:0005488,binding; GO:0043167,ion binding; GO:0043169,cation binding; GO:0046872,metal ion binding; GO:0006873,cellular ion homeostasis; GO:0006875,cellular metal ion homeostasis; GO:0008150,biological_process; GO:0009987,cellular process; GO:0019725,cellular homeostasis;…	PF00403.29:Heavy-metal-associated domain
IFM89_029476	K17604 zinc finger SWIM domain-containing protein 3 | (RefSeq) protein FAR1-RELATED SEQUENCE 6-like (A)	--	hypothetical protein IFM89_029476 [Coptis chinensis]	PS13B_ARATH RecName: Full=26S proteasome non-ATPase regulatory subunit 13 homolog B; AltName: Full=26S proteasome regulatory subunit RPN9b; Short=AtRNP9b; AltName: Full=26S proteasome regulatory subunit S11 homolog B;	A0A835LVT9_9MAGN RecName: Full=FAR1 domain-containing protein {ECO:0000259|Pfam:PF03101};	--	GO:0005829,cytosol; GO:0005634,nucleus; GO:0000502,proteasome complex; GO:0008541,proteasome regulatory particle, lid subcomplex; GO:0005198,structural molecule activity; GO:0030163,protein catabolic process; GO:0006511,ubiquitin-dependent protein catabolic process; GO:0003674,molecular_function; GO:0006807,nitrogen compound metabolic process; GO:0008150,biological_process; GO:0008152,metabolic p…	PF03101.18:FAR1 DNA-binding domain
IFM89_006127	K13258 2-hydroxyisoflavanone dehydratase [EC:4.2.1.105] | (RefSeq) uncharacterized protein LOC115994703 (A)	ko00943: Isoflavonoid biosynthesis; ko01100: Metabolic pathways; ko01110: Biosynthesis of secondary metabolites	hypothetical protein IFM89_006127 [Coptis chinensis]	CXE13_ARATH RecName: Full=Probable carboxylesterase 13; AltName: Full=AtCXE13; EC=3.1.1.1;	A0A835LA86_9MAGN RecName: Full=Abhydrolase_3 domain-containing protein {ECO:0000259|Pfam:PF07859};	Arylacetamide deacetylase	GO:0005829,cytosol; GO:0016787,hydrolase activity; GO:0080030,methyl indole-3-acetate esterase activity; GO:0003674,molecular_function; GO:0003824,catalytic activity; GO:0016788,hydrolase activity, acting on ester bonds; GO:0052689,carboxylic ester hydrolase activity; GO:0005575,cellular_component; GO:0005622,intracellular anatomical structure; GO:0005737,cytoplasm; GO:0110165,cellular anatomical…	PF07859.16:alpha/beta hydrolase fold
IFM89_029953	K00939 adenylate kinase [EC:2.7.4.3] | (RefSeq) probable adenylate kinase 7, mitochondrial (A)	ko00230: Purine metabolism; ko00730: Thiamine metabolism; ko01100: Metabolic pathways; ko01110: Biosynthesis of secondary metabolites; ko01232: Nucleotide metabolism; ko01240: Biosynthesis of cofactors	hypothetical protein IFM89_029953 [Coptis chinensis]	--	A0A835LK88_9MAGN SubName: Full=Uncharacterized protein {ECO:0000313|EMBL:KAF9598703.1};	--	--	--
IFM89_016567	K08999 uncharacterized protein | (RefSeq) bifunctional nuclease 2-like (A)	--	hypothetical protein IFM89_016567 [Coptis chinensis]	BBD1_ARATH RecName: Full=Bifunctional nuclease 1; Short=AtBBD1; EC=3.1.-.-;	A0A835I1C8_9MAGN RecName: Full=BFN domain-containing protein {ECO:0000259|PROSITE:PS51658};	--	GO:0005634,nucleus; GO:0030891,VCB complex; GO:0004518,nuclease activity; GO:0050832,defense response to fungus; GO:0016567,protein ubiquitination; GO:0003674,molecular_function; GO:0003824,catalytic activity; GO:0016787,hydrolase activity; GO:0016788,hydrolase activity, acting on ester bonds; GO:0006950,response to stress; GO:0006952,defense response; GO:0008150,biological_process; GO:0009605,re…	PF02577.17:Bifunctional nuclease domain
IFM89_002632	K12617 DNA topoisomerase 2-associated protein PAT1 | (RefSeq) protein PAT1 homolog (A)	ko03018: RNA degradation	hypothetical protein IFM89_002632 [Coptis chinensis]	PAT1H_ARATH RecName: Full=Protein PAT1 homolog {ECO:0000305}; Short=AtPAT1 {ECO:0000303|PubMed:25603932};	A0A835GVB0_9MAGN SubName: Full=Uncharacterized protein {ECO:0000313|EMBL:KAF9587451.1};	--	GO:1990726,Lsm1-7-Pat1 complex; GO:0000932,P-body; GO:0003729,mRNA binding; GO:0003723,RNA binding; GO:0000290,deadenylation-dependent decapping of nuclear-transcribed mRNA; GO:0045087,innate immune response; GO:0006397,mRNA processing; GO:0033962,P-body assembly; GO:0003674,molecular_function; GO:0003676,nucleic acid binding; GO:0005488,binding; GO:0097159,organic cyclic compound binding; GO:190…	PF09770.12:Topoisomerase II-associated protein PAT1
IFM89_000767	--	--	hypothetical protein IFM89_000767 [Coptis chinensis]	WDL7_ARATH RecName: Full=Protein WVD2-like 7 {ECO:0000305};	A0A835IXB7_9MAGN RecName: Full=TPX2 domain-containing protein {ECO:0000259|Pfam:PF06886};	--	GO:0055028,cortical microtubule; GO:0009737,response to abscisic acid; GO:0008150,biological_process; GO:0009719,response to endogenous stimulus; GO:0009725,response to hormone; GO:0010033,response to organic substance; GO:0033993,response to lipid; GO:0042221,response to chemical; GO:0050896,response to stimulus; GO:0097305,response to alcohol; GO:1901700,response to oxygen-containing compound; …	PF06886.14:Targeting protein for Xklp2 (TPX2) domain
IFM89_037850	--	--	hypothetical protein IFM89_037850 [Coptis chinensis]	--	A0A835HQS5_9MAGN SubName: Full=Uncharacterized protein {ECO:0000313|EMBL:KAF9603764.1};	Predicted membrane protein	GO:0016021,integral component of membrane; GO:0005575,cellular_component; GO:0016020,membrane; GO:0031224,intrinsic component of membrane; GO:0110165,cellular anatomical entity	PF07851.16:TMPIT-like protein
novel.6694	--	--	Phd finger family protein [Thalictrum thalictroides]	--	A0A7J6WPP5_THATH SubName: Full=Phd finger family protein {ECO:0000313|EMBL:KAF5199339.1};	--	GO:0046872,metal ion binding; GO:0003674,molecular_function; GO:0005488,binding; GO:0043167,ion binding; GO:0043169,cation binding	PF00628.32:PHD-finger
IFM89_026138	K01184 polygalacturonase [EC:3.2.1.15] | (RefSeq) probable polygalacturonase At3g15720 (A)	ko00040: Pentose and glucuronate interconversions; ko01100: Metabolic pathways	hypothetical protein IFM89_026138 [Coptis chinensis]	Y1259_ARATH RecName: Full=DCC family protein At1g52590, chloroplastic; Flags: Precursor;	A0A835IFP3_9MAGN SubName: Full=Uncharacterized protein {ECO:0000313|EMBL:KAF9615723.1};	--	GO:0010287,plastoglobule; GO:0015035,protein-disulfide reductase activity; GO:0003674,molecular_function; GO:0003824,catalytic activity; GO:0015036,disulfide oxidoreductase activity; GO:0016491,oxidoreductase activity; GO:0016667,oxidoreductase activity, acting on a sulfur group of donors; GO:0140096,catalytic activity, acting on a protein; GO:0005575,cellular_component; GO:0005622,intracellular …	PF04134.15:DCC1-like thiol-disulfide oxidoreductase
IFM89_031309	K00026 malate dehydrogenase [EC:1.1.1.37] | (RefSeq) malate dehydrogenase, chloroplastic-like isoform X1 (A)	ko00020: Citrate cycle (TCA cycle); ko00270: Cysteine and methionine metabolism; ko00620: Pyruvate metabolism; ko00630: Glyoxylate and dicarboxylate metabolism; ko00710: Carbon fixation in photosynthetic organisms; ko01100: Metabolic pathways; ko01110: Biosynthesis of secondary metabolites; ko01200: Carbon metabolism	hypothetical protein IFM89_031309 [Coptis chinensis]	MDHP_ARATH RecName: Full=Malate dehydrogenase, chloroplastic {ECO:0000305}; EC=1.1.1.37; AltName: Full=Chloroplastic malate dehydrogenase {ECO:0000303|PubMed:20876337}; Short=Chloroplastic MDH {ECO:0000305}; Short=cpNAD-MDH {ECO:0000303|PubMed:20876337}; AltName: Full=Plastidic NAD-dependent malate dehydrogenase {ECO:0000305}; Short=pNAD-MDH {ECO:0000305}; Flags: Precursor;	A0A835MDZ1_9MAGN RecName: Full=Malate dehydrogenase {ECO:0000256|ARBA:ARBA00012995}; EC=1.1.1.37 {ECO:0000256|ARBA:ARBA00012995};	NAD-dependent malate dehydrogenase	GO:0048046,apoplast; GO:0009507,chloroplast; GO:0009941,chloroplast envelope; GO:0009706,chloroplast inner membrane; GO:0009570,chloroplast stroma; GO:0005737,cytoplasm; GO:0005829,cytosol; GO:0005739,mitochondrion; GO:0000325,plant-type vacuole; GO:0009536,plastid; GO:0009532,plastid stroma; GO:0010319,stromule; GO:0062091,Ycf2/FtsHi complex; GO:0016464,chloroplast protein-transporting ATPase ac…	PF00056.26:lactate/malate dehydrogenase, NAD binding domain
novel.8120	--	--	class-I knotted1-like homeobox protein IBKN3 [Ipomoea batatas]	KN1_SOLLC RecName: Full=Homeotic protein knotted-1; Short=TKN1;	A8QXP7_IPOBA SubName: Full=Class-I knotted1-like homeobox protein IBKN3 {ECO:0000313|EMBL:BAF93480.1};	Transcription factor MEIS1 and related HOX domain proteins	GO:0005634,nucleus; GO:0000981,DNA-binding transcription factor activity, RNA polymerase II-specific; GO:0000978,RNA polymerase II cis-regulatory region sequence-specific DNA binding; GO:0006357,regulation of transcription by RNA polymerase II; GO:0003674,molecular_function; GO:0003700,DNA-binding transcription factor activity; GO:0140110,transcription regulator activity; GO:0000976,transcription…	PF03789.16:ELK domain
IFM89_038746	K00831 phosphoserine aminotransferase [EC:2.6.1.52] | (RefSeq) phosphoserine aminotransferase 2, chloroplastic-like (A)	ko00260: Glycine, serine and threonine metabolism; ko00270: Cysteine and methionine metabolism; ko00750: Vitamin B6 metabolism; ko01100: Metabolic pathways; ko01110: Biosynthesis of secondary metabolites; ko01200: Carbon metabolism; ko01230: Biosynthesis of amino acids; ko01240: Biosynthesis of cofactors	hypothetical protein IFM89_038746 [Coptis chinensis]	SERB2_ARATH RecName: Full=Phosphoserine aminotransferase 2, chloroplastic; Short=AtPSAT2; EC=2.6.1.52; Flags: Precursor;	A0A835HI96_9MAGN RecName: Full=Phosphoserine transaminase {ECO:0000256|ARBA:ARBA00013030}; EC=2.6.1.52 {ECO:0000256|ARBA:ARBA00013030};	Phosphoserine aminotransferase	GO:0009507,chloroplast; GO:0009570,chloroplast stroma; GO:0009534,chloroplast thylakoid; GO:0005737,cytoplasm; GO:0004648,O-phospho-L-serine:2-oxoglutarate aminotransferase activity; GO:0030170,pyridoxal phosphate binding; GO:0006564,L-serine biosynthetic process; GO:0003674,molecular_function; GO:0003824,catalytic activity; GO:0008483,transaminase activity; GO:0016740,transferase activity; GO:00…	PF00266.22:Aminotransferase class-V
IFM89_022307	K19891 glucan endo-1,3-beta-glucosidase 1/2/3 [EC:3.2.1.39] | (RefSeq) hypothetical protein (A)	ko00500: Starch and sucrose metabolism; ko01100: Metabolic pathways	hypothetical protein IFM89_022307 [Coptis chinensis]	E1313_ARATH RecName: Full=Glucan endo-1,3-beta-glucosidase 13; EC=3.2.1.39; AltName: Full=(1->3)-beta-glucan endohydrolase 13; Short=(1->3)-beta-glucanase 13; AltName: Full=Beta-1,3-endoglucanase 13; Short=Beta-1,3-glucanase 13; Flags: Precursor;	A0A835I335_9MAGN RecName: Full=X8 domain-containing protein {ECO:0000259|SMART:SM00768};	--	GO:0031225,anchored component of membrane; GO:0046658,anchored component of plasma membrane; GO:0005576,extracellular region; GO:0005886,plasma membrane; GO:0009536,plastid; GO:0042973,glucan endo-1,3-beta-D-glucosidase activity; GO:0005975,carbohydrate metabolic process; GO:0071555,cell wall organization; GO:0006952,defense response; GO:0003674,molecular_function; GO:0003824,catalytic activity; …	PF00332.21:Glycosyl hydrolases family 17
IFM89_016535	K17338 receptor expression-enhancing protein 1/2/3/4 | (RefSeq) putative HVA22-like protein g isoform X1 (A)	--	hypothetical protein IFM89_016535 [Coptis chinensis]	GLUA3_ORYSJ RecName: Full=Glutelin type-A 3; Contains: RecName: Full=Glutelin type-A 3 acidic chain; Contains: RecName: Full=Glutelin type-A 3 basic chain; Flags: Precursor;	A0A835MER6_9MAGN SubName: Full=Uncharacterized protein {ECO:0000313|EMBL:KAF9621101.1};	--	GO:0045735,nutrient reservoir activity; GO:0003674,molecular_function	PF00190.25:Cupin
IFM89_018609	K10775 phenylalanine ammonia-lyase [EC:4.3.1.24] | (RefSeq) phenylalanine ammonia-lyase (A)	ko00360: Phenylalanine metabolism; ko00940: Phenylpropanoid biosynthesis; ko01100: Metabolic pathways; ko01110: Biosynthesis of secondary metabolites	hypothetical protein IFM89_018609 [Coptis chinensis]	PAL1_PRUAV RecName: Full=Phenylalanine ammonia-lyase 1; EC=4.3.1.24 {ECO:0000250|UniProtKB:P24481};	A0A835LN08_9MAGN RecName: Full=Phenylalanine ammonia-lyase {ECO:0000256|RuleBase:RU003955}; EC=4.3.1.24 {ECO:0000256|RuleBase:RU003955};	Phenylalanine and histidine ammonia-lyase	GO:0005737,cytoplasm; GO:0045548,phenylalanine ammonia-lyase activity; GO:0009800,cinnamic acid biosynthetic process; GO:0006559,L-phenylalanine catabolic process; GO:0003674,molecular_function; GO:0003824,catalytic activity; GO:0016829,lyase activity; GO:0016840,carbon-nitrogen lyase activity; GO:0016841,ammonia-lyase activity; GO:0006082,organic acid metabolic process; GO:0006725,cellular aroma…	PF00221.22:Aromatic amino acid lyase
IFM89_000580	K05909 laccase [EC:1.10.3.2] | (RefSeq) laccase-4-like (A)	--	hypothetical protein IFM89_000580 [Coptis chinensis]	FHY1_ARATH RecName: Full=Protein FAR-RED ELONGATED HYPOCOTYL 1 {ECO:0000303|PubMed:11711433}; AltName: Full=Protein PHYTOCHROME A SIGNAL TRANSDUCTION 3 {ECO:0000303|PubMed:11726703};	A0A835LK65_9MAGN SubName: Full=Uncharacterized protein {ECO:0000313|EMBL:KAF9595492.1};	--	GO:0005737,cytoplasm; GO:0016604,nuclear body; GO:0005634,nucleus; GO:0061608,nuclear import signal receptor activity; GO:0042803,protein homodimerization activity; GO:0010018,far-red light signaling pathway; GO:0031048,small non-coding RNA-dependent heterochromatin formation; GO:0051457,maintenance of protein location in nucleus; GO:0009640,photomorphogenesis; GO:0045893,positive regulation of D…	--
IFM89_029065	K14504 xyloglucan:xyloglucosyl transferase TCH4 [EC:2.4.1.207] | (RefSeq) probable xyloglucan endotransglucosylase/hydrolase protein 23 (A)	ko04075: Plant hormone signal transduction	hypothetical protein IFM89_029065 [Coptis chinensis]	XTH23_ARATH RecName: Full=Probable xyloglucan endotransglucosylase/hydrolase protein 23; Short=At-XTH23; Short=XTH-23; EC=2.4.1.207; Flags: Precursor;	A0A835IFP1_9MAGN RecName: Full=Xyloglucan endotransglucosylase/hydrolase {ECO:0000256|RuleBase:RU361120}; EC=2.4.1.207 {ECO:0000256|RuleBase:RU361120};	--	GO:0048046,apoplast; GO:0005794,Golgi apparatus; GO:0004553,hydrolase activity, hydrolyzing O-glycosyl compounds; GO:0030247,polysaccharide binding; GO:0016762,xyloglucan:xyloglucosyl transferase activity; GO:0042546,cell wall biogenesis; GO:0071555,cell wall organization; GO:0010411,xyloglucan metabolic process; GO:0003674,molecular_function; GO:0003824,catalytic activity; GO:0016787,hydrolase a…	PF00722.24:Glycosyl hydrolases family 16
IFM89_009083	K00670 N-alpha-acetyltransferase 30 [EC:2.3.1.256] | (RefSeq) N-alpha-acetyltransferase MAK3 (A)	--	hypothetical protein IFM89_009083 [Coptis chinensis]	MAK3_ARATH RecName: Full=N-alpha-acetyltransferase MAK3; EC=2.3.1.256 {ECO:0000303|PubMed:12897255}; AltName: Full=N-acetyltransferase MAK3 homolog; Short=AtMAK3; AltName: Full=Protein PHOTOSYNTHESIS ALTERED MUTANT 21;	A0A835IKR6_9MAGN RecName: Full=N-acetyltransferase domain-containing protein {ECO:0000259|PROSITE:PS51186};	N-acetyltransferase	GO:0005737,cytoplasm; GO:0031417,NatC complex; GO:0004596,peptide alpha-N-acetyltransferase activity; GO:0017196,N-terminal peptidyl-methionine acetylation; GO:0003674,molecular_function; GO:0003824,catalytic activity; GO:0008080,N-acetyltransferase activity; GO:0016407,acetyltransferase activity; GO:0016410,N-acyltransferase activity; GO:0016740,transferase activity; GO:0016746,acyltransferase a…	PF00583.28:Acetyltransferase (GNAT) family
IFM89_033162	K14376 poly(A) polymerase [EC:2.7.7.19] | (RefSeq) nuclear poly(A) polymerase 4-like (A)	ko03015: mRNA surveillance pathway	hypothetical protein IFM89_033162 [Coptis chinensis]	PAPS4_ARATH RecName: Full=Nuclear poly(A) polymerase 4 {ECO:0000303|PubMed:18479511}; Short=AtPAP(IV) {ECO:0000303|PubMed:16282318}; Short=PAP(IV) {ECO:0000305}; Short=Poly(A) polymerase IV {ECO:0000305}; Short=nPAP {ECO:0000303|PubMed:16282318}; EC=2.7.7.19 {ECO:0000269|PubMed:15297145}; AltName: Full=Polynucleotide adenylyltransferase 4 {ECO:0000305};	A0A835IIJ2_9MAGN RecName: Full=Polynucleotide adenylyltransferase {ECO:0000256|ARBA:ARBA00012388}; EC=2.7.7.19 {ECO:0000256|ARBA:ARBA00012388};	Poly(A) polymerase and related nucleotidyltransferases	GO:0005634,nucleus; GO:0005524,ATP binding; GO:0046872,metal ion binding; GO:0004652,polynucleotide adenylyltransferase activity; GO:0003723,RNA binding; GO:0006378,mRNA polyadenylation; GO:0043631,RNA polyadenylation; GO:0000166,nucleotide binding; GO:0003674,molecular_function; GO:0005488,binding; GO:0017076,purine nucleotide binding; GO:0030554,adenyl nucleotide binding; GO:0032553,ribonucleot…	PF04928.20:Poly(A) polymerase central domain
IFM89_032849	K19045 E3 ubiquitin-protein ligase BIG BROTHER and related proteins [EC:2.3.2.27] | (RefSeq) E3 ubiquitin ligase BIG BROTHER-related-like (A)	--	hypothetical protein IFM89_032849 [Coptis chinensis]	BB_ARATH RecName: Full=E3 ubiquitin-protein ligase BIG BROTHER; EC=2.3.2.27 {ECO:0000269|PubMed:16461280, ECO:0000269|PubMed:18483219}; AltName: Full=Protein ENHANCER OF DA1-1; AltName: Full=RING-type E3 ubiquitin transferase BIG BROTHER {ECO:0000305};	A0A835II62_9MAGN SubName: Full=Uncharacterized protein {ECO:0000313|EMBL:KAF9616887.1};	FOG: Predicted E3 ubiquitin ligase	GO:0046872,metal ion binding; GO:0031624,ubiquitin conjugating enzyme binding; GO:0004842,ubiquitin-protein transferase activity; GO:0048437,floral organ development; GO:0008285,negative regulation of cell population proliferation; GO:0046621,negative regulation of organ growth; GO:1900057,positive regulation of leaf senescence; GO:0051865,protein autoubiquitination; GO:0016567,protein ubiquitina…	--
IFM89_016480	K03676 glutaredoxin 3 | (RefSeq) monothiol glutaredoxin-S3-like (A)	--	hypothetical protein IFM89_016480 [Coptis chinensis]	GRXS2_ARATH RecName: Full=Monothiol glutaredoxin-S2; Short=AtGrxS2; AltName: Full=Protein ROXY 10;	A0A835HQY0_9MAGN RecName: Full=Glutaredoxin domain-containing protein {ECO:0000259|Pfam:PF00462};	Glutaredoxin and related proteins	GO:0005737,cytoplasm; GO:0051537,2 iron, 2 sulfur cluster binding; GO:0097573,glutathione oxidoreductase activity; GO:0046872,metal ion binding; GO:0000122,negative regulation of transcription by RNA polymerase II; GO:0003674,molecular_function; GO:0005488,binding; GO:0051536,iron-sulfur cluster binding; GO:0051540,metal cluster binding; GO:0003824,catalytic activity; GO:0015035,protein-disulfide…	PF00462.27:Glutaredoxin
IFM89_024488	K19996 phosphatidylinositol transfer protein SFH5 | (RefSeq) patellin-3 (A)	--	hypothetical protein IFM89_024488 [Coptis chinensis]	PATL3_ARATH RecName: Full=Patellin-3;	A0A835H5M0_9MAGN RecName: Full=CRAL_TRIO_N domain-containing protein {ECO:0000259|SMART:SM01100};	Phosphatidylinositol transfer protein SEC14 and related proteins	GO:0005737,cytoplasm; GO:0005886,plasma membrane; GO:0008289,lipid binding; GO:0007049,cell cycle; GO:0051301,cell division; GO:0003674,molecular_function; GO:0005488,binding; GO:0008150,biological_process; GO:0009987,cellular process; GO:0005575,cellular_component; GO:0005622,intracellular anatomical structure; GO:0110165,cellular anatomical entity; GO:0016020,membrane; GO:0071944,cell periphery	PF03765.18:CRAL/TRIO, N-terminal domain
IFM89_019462	K15227 arogenate dehydrogenase (NADP+), plant [EC:1.3.1.78] | (RefSeq) arogenate dehydrogenase 2, chloroplastic-like (A)	ko00400: Phenylalanine, tyrosine and tryptophan biosynthesis; ko01100: Metabolic pathways; ko01110: Biosynthesis of secondary metabolites; ko01230: Biosynthesis of amino acids	hypothetical protein IFM89_019462 [Coptis chinensis]	TYRA2_ARATH RecName: Full=Arogenate dehydrogenase 2, chloroplastic; EC=1.3.1.78; AltName: Full=TyrAAT2; Flags: Precursor;	A0A835GYB7_9MAGN RecName: Full=Prephenate/arogenate dehydrogenase domain-containing protein {ECO:0000259|PROSITE:PS51176};	Prephenate dehydrogenase (NADP+)	GO:0009507,chloroplast; GO:0033730,arogenate dehydrogenase (NADP+) activity; GO:0008977,prephenate dehydrogenase (NAD+) activity; GO:0004665,prephenate dehydrogenase (NADP+) activity; GO:0006571,tyrosine biosynthetic process; GO:0003674,molecular_function; GO:0003824,catalytic activity; GO:0016491,oxidoreductase activity; GO:0016627,oxidoreductase activity, acting on the CH-CH group of donors; GO…	PF02153.20:Prephenate dehydrogenase, nucleotide-binding domain
IFM89_008136	K07199 5'-AMP-activated protein kinase, regulatory beta subunit | (RefSeq) SNF1-related protein kinase regulatory subunit beta-1-like (A)	--	hypothetical protein IFM89_008136 [Coptis chinensis]	KINB1_ARATH RecName: Full=SNF1-related protein kinase regulatory subunit beta-1; Short=AKIN subunit beta-1; Short=AKINB1; Short=AKINbeta1;	A0A835IVW5_9MAGN RecName: Full=AMPKBI domain-containing protein {ECO:0000259|SMART:SM01010};	Protein involved in Snf1 protein kinase complex assembly	GO:0009507,chloroplast; GO:0005886,plasma membrane; GO:0005524,ATP binding; GO:0005975,carbohydrate metabolic process; GO:0006633,fatty acid biosynthetic process; GO:0042128,nitrate assimilation; GO:0000166,nucleotide binding; GO:0003674,molecular_function; GO:0005488,binding; GO:0017076,purine nucleotide binding; GO:0030554,adenyl nucleotide binding; GO:0032553,ribonucleotide binding; GO:0032555…	PF16561.8:Glycogen recognition site of AMP-activated protein kinase
IFM89_034548	K09286 EREBP-like factor | (RefSeq) ethylene-responsive transcription factor ERF105-like (A)	--	hypothetical protein IFM89_034548 [Coptis chinensis]	ERF5_TOBAC RecName: Full=Ethylene-responsive transcription factor 5; AltName: Full=Ethylene-responsive element-binding factor 4; Short=EREBP-4; AltName: Full=Ethylene-responsive element-binding factor 5 homolog; AltName: Full=NtERF4;	A0A835HLT8_9MAGN RecName: Full=AP2/ERF domain-containing protein {ECO:0000259|PROSITE:PS51032};	--	GO:0005634,nucleus; GO:0003677,DNA binding; GO:0003700,DNA-binding transcription factor activity; GO:0006952,defense response; GO:0009873,ethylene-activated signaling pathway; GO:0003674,molecular_function; GO:0003676,nucleic acid binding; GO:0005488,binding; GO:0097159,organic cyclic compound binding; GO:1901363,heterocyclic compound binding; GO:0140110,transcription regulator activity; GO:00069…	PF00847.23:AP2 domain
IFM89_022539	K22382 WD repeat-containing protein 26 | (RefSeq) WD repeat-containing protein 26 homolog (A)	--	hypothetical protein IFM89_022539, partial [Coptis chinensis]	GRF6_ORYSJ RecName: Full=Growth-regulating factor 6; Short=OsGRF6; AltName: Full=Transcription activator GRF6;	A0A835MF57_9MAGN RecName: Full=Growth-regulating factor {ECO:0000256|RuleBase:RU367127}; Flags: Fragment;	--	GO:0005634,nucleus; GO:0005524,ATP binding; GO:0032502,developmental process; GO:0006355,regulation of DNA-templated transcription; GO:0006351,DNA-templated transcription; GO:0000166,nucleotide binding; GO:0003674,molecular_function; GO:0005488,binding; GO:0017076,purine nucleotide binding; GO:0030554,adenyl nucleotide binding; GO:0032553,ribonucleotide binding; GO:0032555,purine ribonucleotide b…	PF08879.13:WRC
IFM89_010632	K10579 ubiquitin-conjugating enzyme E2 M [EC:2.3.2.34] | (RefSeq) NEDD8-conjugating enzyme Ubc12-like (A)	ko04120: Ubiquitin mediated proteolysis	hypothetical protein IFM89_010632 [Coptis chinensis]	RCE1_ARATH RecName: Full=NEDD8-conjugating enzyme Ubc12; EC=2.3.2.-; AltName: Full=RUB1 carrier protein 1; AltName: Full=RUB1-conjugating enzyme 1;	A0A835ILN0_9MAGN RecName: Full=UBC core domain-containing protein {ECO:0000259|PROSITE:PS50127};	Ubiquitin-protein ligase	GO:0005634,nucleus; GO:0005524,ATP binding; GO:0019788,NEDD8 transferase activity; GO:0045116,protein neddylation; GO:0009733,response to auxin; GO:0000166,nucleotide binding; GO:0003674,molecular_function; GO:0005488,binding; GO:0017076,purine nucleotide binding; GO:0030554,adenyl nucleotide binding; GO:0032553,ribonucleotide binding; GO:0032555,purine ribonucleotide binding; GO:0032559,adenyl r…	PF00179.29:Ubiquitin-conjugating enzyme
IFM89_037388	K13384 (RS)-1-benzyl-1,2,3,4-tetrahydroisoquinoline N-methyltransferase [EC:2.1.1.115 2.1.1.140] | (RefSeq) (S)-coclaurine N-methyltransferase (A)	ko00950: Isoquinoline alkaloid biosynthesis; ko01100: Metabolic pathways; ko01110: Biosynthesis of secondary metabolites	hypothetical protein IFM89_037388 [Coptis chinensis]	PNMT_THLFG RecName: Full=Pavine N-methyltransferase {ECO:0000303|PubMed:19624470}; Short=PfPavNMT {ECO:0000303|PubMed:19624470}; EC=2.1.1.300 {ECO:0000269|PubMed:19624470, ECO:0000269|PubMed:27573242};	A0A835MBE0_9MAGN SubName: Full=Uncharacterized protein {ECO:0000313|EMBL:KAF9617576.1};	--	GO:0005737,cytoplasm; GO:0008168,methyltransferase activity; GO:0032259,methylation; GO:0003674,molecular_function; GO:0003824,catalytic activity; GO:0016740,transferase activity; GO:0016741,transferase activity, transferring one-carbon groups; GO:0008150,biological_process; GO:0008152,metabolic process; GO:0005575,cellular_component; GO:0005622,intracellular anatomical structure; GO:0110165,cell…	PF02353.23:Mycolic acid cyclopropane synthetase
novel.4438	K01866 tyrosyl-tRNA synthetase [EC:6.1.1.1] | (RefSeq) tyrosine--tRNA ligase 1, cytoplasmic (A)	ko00970: Aminoacyl-tRNA biosynthesis	hypothetical protein IFM89_019883 [Coptis chinensis]	SYYC1_ARATH RecName: Full=Tyrosine--tRNA ligase 1, cytoplasmic {ECO:0000305}; EC=6.1.1.1 {ECO:0000305}; AltName: Full=Tyrosyl-tRNA synthetase {ECO:0000305}; Short=TyrRS {ECO:0000305};	A0A835LJW3_9MAGN RecName: Full=Peptidase A1 domain-containing protein {ECO:0000259|PROSITE:PS51767};	Tyrosyl-tRNA synthetase, cytoplasmic	GO:0005829,cytosol; GO:0005524,ATP binding; GO:0004831,tyrosine-tRNA ligase activity; GO:0006418,tRNA aminoacylation for protein translation; GO:0000166,nucleotide binding; GO:0003674,molecular_function; GO:0005488,binding; GO:0017076,purine nucleotide binding; GO:0030554,adenyl nucleotide binding; GO:0032553,ribonucleotide binding; GO:0032555,purine ribonucleotide binding; GO:0032559,adenyl ribo…	PF14543.9:Xylanase inhibitor N-terminal
IFM89_015844	K03676 glutaredoxin 3 | (RefSeq) monothiol glutaredoxin-S10-like (A)	--	hypothetical protein IFM89_015844 [Coptis chinensis]	GRS10_ARATH RecName: Full=Monothiol glutaredoxin-S10; Short=AtGrxS10; AltName: Full=Protein ROXY 3;	A0A835M953_9MAGN RecName: Full=Glutaredoxin domain-containing protein {ECO:0000259|Pfam:PF00462};	Glutaredoxin and related proteins	GO:0005737,cytoplasm; GO:0005634,nucleus; GO:0051537,2 iron, 2 sulfur cluster binding; GO:0097573,glutathione oxidoreductase activity; GO:0046872,metal ion binding; GO:0000122,negative regulation of transcription by RNA polymerase II; GO:0003674,molecular_function; GO:0005488,binding; GO:0051536,iron-sulfur cluster binding; GO:0051540,metal cluster binding; GO:0003824,catalytic activity; GO:00150…	PF00462.27:Glutaredoxin
IFM89_028719	--	--	hypothetical protein IFM89_028719 [Coptis chinensis]	--	A0A835GYH0_9MAGN SubName: Full=Uncharacterized protein {ECO:0000313|EMBL:KAF9589784.1};	--	--	PF13671.9:AAA domain
IFM89_018751	K01784 UDP-glucose 4-epimerase [EC:5.1.3.2] | (RefSeq) bifunctional UDP-glucose 4-epimerase and UDP-xylose 4-epimerase 1 (A)	ko00052: Galactose metabolism; ko00520: Amino sugar and nucleotide sugar metabolism; ko01100: Metabolic pathways; ko01250: Biosynthesis of nucleotide sugars	hypothetical protein IFM89_018751 [Coptis chinensis]	UGE1_PEA RecName: Full=Bifunctional UDP-glucose 4-epimerase and UDP-xylose 4-epimerase 1 {ECO:0000303|PubMed:19754426}; EC=5.1.3.2 {ECO:0000269|PubMed:19754426}; EC=5.1.3.5 {ECO:0000269|PubMed:19754426}; AltName: Full=UDP-D-xylose 4-epimerase {ECO:0000305}; AltName: Full=UDP-L-arabinose 4-epimerase {ECO:0000305}; AltName: Full=UDP-galactose 4-epimerase 1 {ECO:0000303|PubMed:19754426}; AltName: Fu…	A0A835HNK0_9MAGN RecName: Full=UDP-glucose 4-epimerase {ECO:0000256|RuleBase:RU366046}; EC=5.1.3.- {ECO:0000256|RuleBase:RU366046};	UDP-glucose 4-epimerase/UDP-sulfoquinovose synthase	GO:0050373,UDP-arabinose 4-epimerase activity; GO:0003978,UDP-glucose 4-epimerase activity; GO:0045227,capsule polysaccharide biosynthetic process; GO:0071555,cell wall organization; GO:0006012,galactose metabolic process; GO:0033358,UDP-L-arabinose biosynthetic process; GO:0003674,molecular_function; GO:0003824,catalytic activity; GO:0016853,isomerase activity; GO:0016854,racemase and epimerase …	PF16363.8:GDP-mannose 4,6 dehydratase
novel.1362	K10406 kinesin family member C2/C3 | (RefSeq) kinesin-like protein KIN-14L (A)	--	hypothetical protein IFM89_035678 [Coptis chinensis]	--	A0A835IWR7_9MAGN SubName: Full=Uncharacterized protein {ECO:0000313|EMBL:KAF9622963.1};	--	--	--
IFM89_008685	K04733 interleukin-1 receptor-associated kinase 4 [EC:2.7.11.1] | (RefSeq) G-type lectin S-receptor-like serine/threonine-protein kinase RKS1 isoform X1 (A)	--	hypothetical protein IFM89_008685 [Coptis chinensis]	CRK10_ARATH RecName: Full=Cysteine-rich receptor-like protein kinase 10; Short=Cysteine-rich RLK10; EC=2.7.11.-; AltName: Full=Receptor-like protein kinase 4; Flags: Precursor;	A0A835H031_9MAGN SubName: Full=Uncharacterized protein {ECO:0000313|EMBL:KAF9588268.1};	--	GO:0005829,cytosol; GO:0016021,integral component of membrane; GO:0005886,plasma membrane; GO:0005524,ATP binding; GO:0106310,protein serine kinase activity; GO:0004674,protein serine/threonine kinase activity; GO:0042742,defense response to bacterium; GO:0006468,protein phosphorylation; GO:0000166,nucleotide binding; GO:0003674,molecular_function; GO:0005488,binding; GO:0017076,purine nucleotide…	PF01657.20:Salt stress response/antifungal
IFM89_037117	K05933 aminocyclopropanecarboxylate oxidase [EC:1.14.17.4] | (RefSeq) 1-aminocyclopropane-1-carboxylate oxidase (A)	ko00270: Cysteine and methionine metabolism; ko01100: Metabolic pathways; ko01110: Biosynthesis of secondary metabolites	hypothetical protein IFM89_037117 [Coptis chinensis]	ACCO_ACTDE RecName: Full=1-aminocyclopropane-1-carboxylate oxidase; Short=ACC oxidase; EC=1.14.17.4; AltName: Full=Ethylene-forming enzyme; Short=EFE;	A0A835LFM9_9MAGN RecName: Full=Fe2OG dioxygenase domain-containing protein {ECO:0000259|PROSITE:PS51471};	Iron/ascorbate family oxidoreductases	GO:0009815,1-aminocyclopropane-1-carboxylate oxidase activity; GO:0031418,L-ascorbic acid binding; GO:0046872,metal ion binding; GO:0016705,oxidoreductase activity, acting on paired donors, with incorporation or reduction of molecular oxygen; GO:0009693,ethylene biosynthetic process; GO:0009835,fruit ripening; GO:0003674,molecular_function; GO:0003824,catalytic activity; GO:0004497,monooxygenase …	PF03171.23:2OG-Fe(II) oxygenase superfamily
IFM89_029861	K11883 RNA-binding protein NOB1 | (RefSeq) RNA-binding protein NOB1 isoform X1 (A)	ko03008: Ribosome biogenesis in eukaryotes	hypothetical protein IFM89_029861, partial [Coptis chinensis]	HIP39_ARATH RecName: Full=Heavy metal-associated isoprenylated plant protein 39 {ECO:0000303|PubMed:21072340, ECO:0000303|PubMed:23368984}; Short=AtHIP39 {ECO:0000303|PubMed:21072340, ECO:0000303|PubMed:23368984}; Flags: Precursor;	A0A835HQN6_9MAGN RecName: Full=HMA domain-containing protein {ECO:0000259|Pfam:PF00403}; Flags: Fragment;	Copper chaperone	GO:0046872,metal ion binding; GO:0003674,molecular_function; GO:0005488,binding; GO:0043167,ion binding; GO:0043169,cation binding	PF00403.29:Heavy-metal-associated domain
IFM89_038112	--	--	hypothetical protein IFM89_038112 [Coptis chinensis]	FBK46_ARATH RecName: Full=F-box/kelch-repeat protein At2g44130;	A0A835HQZ1_9MAGN RecName: Full=F-box domain-containing protein {ECO:0000259|PROSITE:PS50181};	FOG: Kelch repeat	GO:0005829,cytosol; GO:2000762,regulation of phenylpropanoid metabolic process; GO:0006725,cellular aromatic compound metabolic process; GO:0008150,biological_process; GO:0008152,metabolic process; GO:0009698,phenylpropanoid metabolic process; GO:0009987,cellular process; GO:0019222,regulation of metabolic process; GO:0019748,secondary metabolic process; GO:0031323,regulation of cellular metaboli…	PF01344.28:Kelch motif
novel.7007	--	--	--	--	--	--	--	--
IFM89_039622	--	--	hypothetical protein IFM89_039622 [Coptis chinensis]	CBSX3_ARATH RecName: Full=CBS domain-containing protein CBSX3, mitochondrial; Flags: Precursor;	A0A835LC82_9MAGN SubName: Full=Uncharacterized protein {ECO:0000313|EMBL:KAF9587182.1};	--	GO:0005829,cytosol; GO:0005739,mitochondrion; GO:0005886,plasma membrane; GO:0050897,cobalt ion binding; GO:0045454,cell redox homeostasis; GO:0003674,molecular_function; GO:0005488,binding; GO:0043167,ion binding; GO:0043169,cation binding; GO:0046872,metal ion binding; GO:0046914,transition metal ion binding; GO:0008150,biological_process; GO:0009987,cellular process; GO:0019725,cellular homeos…	PF00571.31:CBS domain
IFM89_023647	K01251 adenosylhomocysteinase [EC:3.3.1.1] | (RefSeq) adenosylhomocysteinase (A)	ko00270: Cysteine and methionine metabolism; ko01100: Metabolic pathways	hypothetical protein IFM89_023647 [Coptis chinensis]	SAHH_CATRO RecName: Full=Adenosylhomocysteinase; Short=AdoHcyase; EC=3.3.1.1; AltName: Full=S-adenosyl-L-homocysteine hydrolase;	A0A835HXX9_9MAGN RecName: Full=Adenosylhomocysteinase {ECO:0000256|ARBA:ARBA00012685, ECO:0000256|RuleBase:RU000548}; EC=3.3.1.1 {ECO:0000256|ARBA:ARBA00012685, ECO:0000256|RuleBase:RU000548};	S-adenosylhomocysteine hydrolase	GO:0004013,adenosylhomocysteinase activity; GO:0006730,one-carbon metabolic process; GO:0003674,molecular_function; GO:0003824,catalytic activity; GO:0016787,hydrolase activity; GO:0016801,hydrolase activity, acting on ether bonds; GO:0016802,trialkylsulfonium hydrolase activity; GO:0008150,biological_process; GO:0008152,metabolic process; GO:0009987,cellular process; GO:0044237,cellular metaboli…	PF05221.20:S-adenosyl-L-homocysteine hydrolase
IFM89_033889	--	--	hypothetical protein IFM89_033889 [Coptis chinensis]	PCR8_ARATH RecName: Full=Protein PLANT CADMIUM RESISTANCE 8; Short=AtPCR8;	A0A835LCG2_9MAGN SubName: Full=Uncharacterized protein {ECO:0000313|EMBL:KAF9590363.1};	--	GO:0016021,integral component of membrane; GO:0005886,plasma membrane; GO:0006979,response to oxidative stress; GO:0006950,response to stress; GO:0008150,biological_process; GO:0050896,response to stimulus; GO:0005575,cellular_component; GO:0016020,membrane; GO:0031224,intrinsic component of membrane; GO:0110165,cellular anatomical entity; GO:0071944,cell periphery	PF04749.20:PLAC8 family
novel.593	K13428 LRR receptor-like serine/threonine-protein kinase EFR [EC:2.7.11.1] | (RefSeq) hypothetical protein (A)	ko04626: Plant-pathogen interaction	hypothetical protein AQUCO_03000016v1 [Aquilegia coerulea]	Y3475_ARATH RecName: Full=Probable LRR receptor-like serine/threonine-protein kinase At3g47570; EC=2.7.11.1; Flags: Precursor;	A0A2G5D0V8_AQUCA RecName: Full=Protein kinase domain-containing protein {ECO:0000259|PROSITE:PS50011};	--	GO:0016021,integral component of membrane; GO:0005886,plasma membrane; GO:0005524,ATP binding; GO:0106310,protein serine kinase activity; GO:0004674,protein serine/threonine kinase activity; GO:0006468,protein phosphorylation; GO:0000166,nucleotide binding; GO:0003674,molecular_function; GO:0005488,binding; GO:0017076,purine nucleotide binding; GO:0030554,adenyl nucleotide binding; GO:0032553,rib…	PF00069.28:Protein kinase domain
IFM89_018004	K05894 12-oxophytodienoic acid reductase [EC:1.3.1.42] | (RefSeq) 12-oxophytodienoate reductase 2-like (A)	ko00592: alpha-Linolenic acid metabolism; ko01100: Metabolic pathways; ko01110: Biosynthesis of secondary metabolites	hypothetical protein IFM89_018004 [Coptis chinensis]	OPR11_ORYSJ RecName: Full=Putative 12-oxophytodienoate reductase 11; EC=1.3.1.-; AltName: Full=OPDA-reductase 11; Short=OsOPR11;	A0A835HVU3_9MAGN RecName: Full=Oxidored_FMN domain-containing protein {ECO:0000259|Pfam:PF00724};	NADH:flavin oxidoreductase/12-oxophytodienoate reductase	GO:0010181,FMN binding; GO:0016491,oxidoreductase activity; GO:0006633,fatty acid biosynthetic process; GO:0031408,oxylipin biosynthetic process; GO:0000166,nucleotide binding; GO:0003674,molecular_function; GO:0005488,binding; GO:0032553,ribonucleotide binding; GO:0036094,small molecule binding; GO:0043167,ion binding; GO:0043168,anion binding; GO:0097159,organic cyclic compound binding; GO:0097…	PF00724.23:NADH:flavin oxidoreductase / NADH oxidase family
IFM89_002698	K14499 BRI1 kinase inhibitor 1 | (RefSeq) BRI1 kinase inhibitor 1-like (A)	ko04075: Plant hormone signal transduction	hypothetical protein IFM89_002698 [Coptis chinensis]	MAKR1_ARATH RecName: Full=Probable membrane-associated kinase regulator 1;	A0A835IH29_9MAGN SubName: Full=Uncharacterized protein {ECO:0000313|EMBL:KAF9618830.1};	--	GO:0005829,cytosol; GO:0005886,plasma membrane; GO:0009536,plastid; GO:0019210,kinase inhibitor activity; GO:0009742,brassinosteroid mediated signaling pathway; GO:0006629,lipid metabolic process; GO:0009741,response to brassinosteroid; GO:0003674,molecular_function; GO:0004857,enzyme inhibitor activity; GO:0019207,kinase regulator activity; GO:0030234,enzyme regulator activity; GO:0098772,molecu…	--
IFM89_032024	K00521 ferric-chelate reductase [EC:1.16.1.7] | (RefSeq) ferric reduction oxidase 8, mitochondrial (A)	--	hypothetical protein IFM89_032024 [Coptis chinensis]	FRO8_ARATH RecName: Full=Ferric reduction oxidase 8, mitochondrial; Short=AtFRO8; EC=1.16.1.7; AltName: Full=Ferric-chelate reductase 8; Flags: Precursor;	A0A835LK42_9MAGN RecName: Full=FAD-binding FR-type domain-containing protein {ECO:0000259|PROSITE:PS51384};	Ferric reductase, NADH/NADPH oxidase and related proteins	GO:0016021,integral component of membrane; GO:0031966,mitochondrial membrane; GO:0005739,mitochondrion; GO:0005886,plasma membrane; GO:0140618,ferric-chelate reductase (NADH) activity; GO:0000293,ferric-chelate reductase activity; GO:0046872,metal ion binding; GO:0006811,ion transport; GO:0003674,molecular_function; GO:0003824,catalytic activity; GO:0016491,oxidoreductase activity; GO:0016722,oxi…	PF08022.15:FAD-binding domain
IFM89_004629	K13379 reversibly glycosylated polypeptide / UDP-arabinopyranose mutase [EC:2.4.1.- 5.4.99.30] | (RefSeq) alpha-1,4-glucan-protein synthase [UDP-forming] 2-like (A)	ko00520: Amino sugar and nucleotide sugar metabolism; ko01100: Metabolic pathways; ko01250: Biosynthesis of nucleotide sugars	hypothetical protein IFM89_004629 [Coptis chinensis]	RGP2_SOLTU RecName: Full=Probable UDP-arabinopyranose mutase 2 {ECO:0000305}; EC=5.4.99.30 {ECO:0000250|UniProtKB:Q8H8T0}; AltName: Full=Reversibly glycosylated polypeptide 2 {ECO:0000303|PubMed:10580281}; Short=RGP2 {ECO:0000303|PubMed:10580281}; AltName: Full=UDP-L-arabinose mutase 2 {ECO:0000305}; AltName: Full=UDP-glucose:protein transglucosylase 2 {ECO:0000303|PubMed:10580281}; Short=UPTG 2 …	A0A835H1G7_9MAGN RecName: Full=UDP-arabinopyranose mutase {ECO:0000256|ARBA:ARBA00012805, ECO:0000256|PIRNR:PIRNR016429}; EC=5.4.99.30 {ECO:0000256|ARBA:ARBA00012805, ECO:0000256|PIRNR:PIRNR016429};	--	GO:0005829,cytosol; GO:0005576,extracellular region; GO:0005794,Golgi apparatus; GO:0009506,plasmodesma; GO:0052691,UDP-arabinopyranose mutase activity; GO:0071555,cell wall organization; GO:0030244,cellulose biosynthetic process; GO:0009832,plant-type cell wall biogenesis; GO:0006486,protein glycosylation; GO:0033356,UDP-L-arabinose metabolic process; GO:0003674,molecular_function; GO:0003824,ca…	PF03214.16:Reversibly glycosylated polypeptide
IFM89_034758	K10775 phenylalanine ammonia-lyase [EC:4.3.1.24] | (RefSeq) phenylalanine ammonia-lyase (A)	ko00360: Phenylalanine metabolism; ko00940: Phenylpropanoid biosynthesis; ko01100: Metabolic pathways; ko01110: Biosynthesis of secondary metabolites	hypothetical protein IFM89_034758 [Coptis chinensis]	PAL1_PRUAV RecName: Full=Phenylalanine ammonia-lyase 1; EC=4.3.1.24 {ECO:0000250|UniProtKB:P24481};	A0A835LHC2_9MAGN RecName: Full=Phenylalanine ammonia-lyase {ECO:0000256|RuleBase:RU003955}; EC=4.3.1.24 {ECO:0000256|RuleBase:RU003955};	Phenylalanine and histidine ammonia-lyase	GO:0005737,cytoplasm; GO:0045548,phenylalanine ammonia-lyase activity; GO:0009800,cinnamic acid biosynthetic process; GO:0006559,L-phenylalanine catabolic process; GO:0003674,molecular_function; GO:0003824,catalytic activity; GO:0016829,lyase activity; GO:0016840,carbon-nitrogen lyase activity; GO:0016841,ammonia-lyase activity; GO:0006082,organic acid metabolic process; GO:0006725,cellular aroma…	PF00221.22:Aromatic amino acid lyase
IFM89_001149	--	--	hypothetical protein IFM89_001149 [Coptis chinensis]	--	A0A835IIJ3_9MAGN SubName: Full=Uncharacterized protein {ECO:0000313|EMBL:KAF9618426.1};	--	GO:0016021,integral component of membrane; GO:0005575,cellular_component; GO:0016020,membrane; GO:0031224,intrinsic component of membrane; GO:0110165,cellular anatomical entity	--
IFM89_015177	K12812 ATP-dependent RNA helicase UAP56/SUB2 [EC:3.6.4.13] | (RefSeq) ATP-dependent RNA helicase MAK5-like (A)	ko03013: Nucleocytoplasmic transport; ko03015: mRNA surveillance pathway; ko03040: Spliceosome	hypothetical protein IFM89_015177 [Coptis chinensis]	C2D61_ARATH RecName: Full=C2 domain-containing protein At1g53590; AltName: Full=N-terminal-TM-C2 domain type 6 protein 1; Short=NTMC2TYPE6.1;	A0A835GWC6_9MAGN SubName: Full=Uncharacterized protein {ECO:0000313|EMBL:KAF9588740.1};	Ca2+-dependent lipid-binding protein CLB1/vesicle protein vp115/Granuphilin A, contains C2 domain	GO:0016021,integral component of membrane; GO:0000325,plant-type vacuole; GO:0008289,lipid binding; GO:0046872,metal ion binding; GO:0006869,lipid transport; GO:0003674,molecular_function; GO:0005488,binding; GO:0043167,ion binding; GO:0043169,cation binding; GO:0006810,transport; GO:0008150,biological_process; GO:0010876,lipid localization; GO:0033036,macromolecule localization; GO:0051179,local…	PF00168.33:C2 domain
novel.7131	--	--	hypothetical protein IFM89_033739 [Coptis chinensis]	--	A0A835LK67_9MAGN SubName: Full=Uncharacterized protein {ECO:0000313|EMBL:KAF9590321.1};	--	GO:0016021,integral component of membrane; GO:0005575,cellular_component; GO:0016020,membrane; GO:0031224,intrinsic component of membrane; GO:0110165,cellular anatomical entity	--
IFM89_027461	K08864 tousled-like kinase [EC:2.7.11.1] | (RefSeq) serine/threonine-protein kinase TOUSLED-like isoform X1 (A)	--	hypothetical protein IFM89_027461 [Coptis chinensis]	CHR42_ARATH RecName: Full=Protein CHLORORESPIRATORY REDUCTION 42, chloroplastic {ECO:0000303|PubMed:22274627}; Flags: Precursor;	A0A835IVE6_9MAGN SubName: Full=Uncharacterized protein {ECO:0000313|EMBL:KAF9625850.1};	Tousled-like protein kinase	GO:0009570,chloroplast stroma; GO:0009536,plastid; GO:0010258,NADH dehydrogenase complex (plastoquinone) assembly; GO:0008150,biological_process; GO:0009987,cellular process; GO:0010257,NADH dehydrogenase complex assembly; GO:0010275,NAD(P)H dehydrogenase complex assembly; GO:0016043,cellular component organization; GO:0022607,cellular component assembly; GO:0043933,protein-containing complex org…	PF11347.11:Protein of unknown function (DUF3148)
IFM89_010014	K17302 coatomer subunit beta' | (RefSeq) uncharacterized protein LOC123140106 (A)	--	hypothetical protein IFM89_010014 [Coptis chinensis]	WAV3_ARATH RecName: Full=E3 ubiquitin-protein ligase WAV3 {ECO:0000305}; EC=2.3.2.27 {ECO:0000269|PubMed:22122664}; AltName: Full=Protein WAVY GROWTH 3 {ECO:0000303|PubMed:22122664}; AltName: Full=RING-type E3 ubiquitin transferase WAV3 {ECO:0000305};	A0A835I1X6_9MAGN SubName: Full=Uncharacterized protein {ECO:0000313|EMBL:KAF9608582.1};	--	GO:0046872,metal ion binding; GO:0061630,ubiquitin protein ligase activity; GO:0009630,gravitropism; GO:0010274,hydrotropism; GO:0016567,protein ubiquitination; GO:0048364,root development; GO:0003674,molecular_function; GO:0005488,binding; GO:0043167,ion binding; GO:0043169,cation binding; GO:0003824,catalytic activity; GO:0004842,ubiquitin-protein transferase activity; GO:0016740,transferase ac…	PF13519.9:von Willebrand factor type A domain
IFM89_030785	K01968 3-methylcrotonyl-CoA carboxylase alpha subunit [EC:6.4.1.4] | (RefSeq) LOW QUALITY PROTEIN: methylcrotonoyl-CoA carboxylase subunit alpha, mitochondrial (A)	ko00280: Valine, leucine and isoleucine degradation; ko01100: Metabolic pathways	hypothetical protein IFM89_030785 [Coptis chinensis]	STY13_ARATH RecName: Full=Serine/threonine-protein kinase STY13 {ECO:0000305}; EC=2.7.11.1 {ECO:0000269|PubMed:16429265}; AltName: Full=AtSTYPK {ECO:0000303|PubMed:17291444}; AltName: Full=Serine/threonine/tyrosine-protein kinase 13 {ECO:0000303|PubMed:16429265};	A0A835MAF8_9MAGN RecName: Full=Protein kinase domain-containing protein {ECO:0000259|PROSITE:PS50011};	Tyrosine kinase specific for activated (GTP-bound) p21cdc42Hs	GO:0005737,cytoplasm; GO:0005524,ATP binding; GO:0004672,protein kinase activity; GO:0106310,protein serine kinase activity; GO:0004674,protein serine/threonine kinase activity; GO:0004712,protein serine/threonine/tyrosine kinase activity; GO:0004713,protein tyrosine kinase activity; GO:0006468,protein phosphorylation; GO:0045995,regulation of embryonic development; GO:0010344,seed oilbody biogen…	PF07714.20:Protein tyrosine and serine/threonine kinase
IFM89_008926	K03122 transcription initiation factor TFIIA large subunit | (RefSeq) uncharacterized protein LOC114825099 (A)	ko03022: Basal transcription factors	hypothetical protein IFM89_008926 [Coptis chinensis]	--	A0A835LEN5_9MAGN RecName: Full=PB1 domain-containing protein {ECO:0000259|PROSITE:PS51745};	--	--	PF00564.27:PB1 domain
IFM89_023610	K17592 sacsin | (RefSeq) sacsin-like (A)	--	hypothetical protein IFM89_023610 [Coptis chinensis]	--	A0A835HM27_9MAGN SubName: Full=Uncharacterized protein {ECO:0000313|EMBL:KAF9601845.1};	--	--	PF12609.11:Wound-induced protein
IFM89_011511	K00826 branched-chain amino acid aminotransferase [EC:2.6.1.42] | (RefSeq) branched-chain-amino-acid aminotransferase 2, chloroplastic-like (A)	ko00270: Cysteine and methionine metabolism; ko00280: Valine, leucine and isoleucine degradation; ko00290: Valine, leucine and isoleucine biosynthesis; ko00770: Pantothenate and CoA biosynthesis; ko00966: Glucosinolate biosynthesis; ko01100: Metabolic pathways; ko01110: Biosynthesis of secondary metabolites; ko01210: 2-Oxocarboxylic acid metabolism; ko01230: Biosynthesis of amino acids; ko01240: …	hypothetical protein IFM89_011511 [Coptis chinensis]	BCAT2_HUMLU RecName: Full=Branched-chain amino acid aminotransferase 2, chloroplastic {ECO:0000303|PubMed:23347725}; Short=HlBCAT2 {ECO:0000303|PubMed:23347725}; EC=2.6.1.42 {ECO:0000269|PubMed:23347725}; Flags: Precursor;	A0A835IBL4_9MAGN RecName: Full=Branched-chain-amino-acid aminotransferase {ECO:0000256|RuleBase:RU004517}; EC=2.6.1.42 {ECO:0000256|RuleBase:RU004517};	Branched chain aminotransferase BCAT1, pyridoxal phosphate enzymes type IV superfamily	GO:0009507,chloroplast; GO:0052656,L-isoleucine transaminase activity; GO:0052654,L-leucine transaminase activity; GO:0050048,L-leucine:2-oxoglutarate aminotransferase activity; GO:0052655,L-valine transaminase activity; GO:0009097,isoleucine biosynthetic process; GO:0009098,leucine biosynthetic process; GO:0009099,valine biosynthetic process; GO:0003674,molecular_function; GO:0003824,catalytic a…	PF01063.22:Amino-transferase class IV
IFM89_009468	K03327 multidrug resistance protein, MATE family | (RefSeq) protein DETOXIFICATION 33-like (A)	--	hypothetical protein IFM89_009468 [Coptis chinensis]	DTX33_ARATH RecName: Full=Protein DETOXIFICATION 33 {ECO:0000303|PubMed:11739388}; Short=AtDTX33 {ECO:0000303|PubMed:11739388}; AltName: Full=Multidrug and toxic compound extrusion protein 33 {ECO:0000305}; Short=MATE protein 33 {ECO:0000305};	A0A835M260_9MAGN RecName: Full=Protein DETOXIFICATION {ECO:0000256|RuleBase:RU004914}; AltName: Full=Multidrug and toxic compound extrusion protein {ECO:0000256|RuleBase:RU004914};	Uncharacterized membrane protein, predicted efflux pump	GO:0016021,integral component of membrane; GO:0016020,membrane; GO:0005634,nucleus; GO:0000325,plant-type vacuole; GO:0015297,antiporter activity; GO:0022857,transmembrane transporter activity; GO:0042910,xenobiotic transmembrane transporter activity; GO:1990961,xenobiotic detoxification by transmembrane export across the plasma membrane; GO:0003674,molecular_function; GO:0005215,transporter acti…	PF01554.21:MatE
IFM89_032585	K14506 jasmonic acid-amino synthetase [EC:6.3.2.52] | (RefSeq) uncharacterized LOC109115461 (A)	ko04075: Plant hormone signal transduction	hypothetical protein IFM89_032585 [Coptis chinensis]	--	A0A835ISN5_9MAGN SubName: Full=Uncharacterized protein {ECO:0000313|EMBL:KAF9622664.1};	--	--	PF04784.17:Protein of unknown function, DUF547
IFM89_026031	K14431 transcription factor TGA | (RefSeq) transcription factor TGA2.2-like (A)	ko04075: Plant hormone signal transduction	hypothetical protein IFM89_026031 [Coptis chinensis]	TGAL1_ORYSJ RecName: Full=Transcription factor TGAL1 {ECO:0000305}; AltName: Full=OsNIF4 {ECO:0000312|EMBL:BAB72064.1}; AltName: Full=bZIP transcription factor 8 {ECO:0000303|PubMed:18065552}; Short=OsbZIP08 {ECO:0000303|PubMed:18065552};	A0A835LFS7_9MAGN SubName: Full=Uncharacterized protein {ECO:0000313|EMBL:KAF9593903.1};	--	GO:0005634,nucleus; GO:0003700,DNA-binding transcription factor activity; GO:0043565,sequence-specific DNA binding; GO:0006952,defense response; GO:0006351,DNA-templated transcription; GO:0003674,molecular_function; GO:0140110,transcription regulator activity; GO:0003676,nucleic acid binding; GO:0003677,DNA binding; GO:0005488,binding; GO:0097159,organic cyclic compound binding; GO:1901363,hetero…	PF14144.9:Seed dormancy control
IFM89_039147	--	--	hypothetical protein AQUCO_00700874v1 [Aquilegia coerulea]	Y2060_ARATH RecName: Full=BTB/POZ domain-containing protein At2g30600;	A0A2G5EM97_AQUCA SubName: Full=Uncharacterized protein {ECO:0000313|EMBL:PIA56821.1};	Proteins containing BTB/POZ and Kelch domains, involved in regulatory/signal transduction processes	GO:0016567,protein ubiquitination; GO:0006807,nitrogen compound metabolic process; GO:0008150,biological_process; GO:0008152,metabolic process; GO:0019538,protein metabolic process; GO:0032446,protein modification by small protein conjugation; GO:0036211,protein modification process; GO:0043170,macromolecule metabolic process; GO:0043412,macromolecule modification; GO:0044238,primary metabolic pr…	PF12248.11:Farnesoic acid 0-methyl transferase
IFM89_014053	K01256 aminopeptidase N [EC:3.4.11.2] | (RefSeq) puromycin-sensitive aminopeptidase-like (A)	ko00480: Glutathione metabolism; ko01100: Metabolic pathways	hypothetical protein IFM89_014053 [Coptis chinensis]	PSA_ORYSJ RecName: Full=Puromycin-sensitive aminopeptidase; Short=PSA; EC=3.4.11.14; AltName: Full=Cytosol alanyl aminopeptidase; Short=AAP-S;	A0A835LVF3_9MAGN SubName: Full=Uncharacterized protein {ECO:0000313|EMBL:KAF9600926.1};	Puromycin-sensitive aminopeptidase and related aminopeptidases	GO:0004177,aminopeptidase activity; GO:0008237,metallopeptidase activity; GO:0008270,zinc ion binding; GO:0006508,proteolysis; GO:0003674,molecular_function; GO:0003824,catalytic activity; GO:0008233,peptidase activity; GO:0008238,exopeptidase activity; GO:0016787,hydrolase activity; GO:0140096,catalytic activity, acting on a protein; GO:0005488,binding; GO:0043167,ion binding; GO:0043169,cation …	PF17432.5:Domain of unknown function (DUF3458_C) ARM repeats
novel.46	--	--	hypothetical protein IFM89_008116, partial [Coptis chinensis]	--	A0A835IZ26_9MAGN SubName: Full=Uncharacterized protein {ECO:0000313|EMBL:KAF9624178.1}; Flags: Fragment;	--	--	PF07172.14:Glycine rich protein family
IFM89_039815	K01593 aromatic-L-amino-acid/L-tryptophan decarboxylase [EC:4.1.1.28 4.1.1.105] | (RefSeq) tyrosine/DOPA decarboxylase 2-like (A)	ko00350: Tyrosine metabolism; ko00360: Phenylalanine metabolism; ko00380: Tryptophan metabolism; ko00901: Indole alkaloid biosynthesis; ko00950: Isoquinoline alkaloid biosynthesis; ko00965: Betalain biosynthesis; ko01100: Metabolic pathways; ko01110: Biosynthesis of secondary metabolites	hypothetical protein IFM89_039815 [Coptis chinensis]	TYDC2_PAPSO RecName: Full=Tyrosine/DOPA decarboxylase 2; Includes: RecName: Full=DOPA decarboxylase; Short=DDC; EC=4.1.1.28; Includes: RecName: Full=Tyrosine decarboxylase; EC=4.1.1.25;	A0A835L9F8_9MAGN RecName: Full=Tyrosine decarboxylase {ECO:0000256|ARBA:ARBA00023470}; EC=4.1.1.25 {ECO:0000256|ARBA:ARBA00023470};	Aromatic-L-amino-acid/L-histidine decarboxylase	GO:0036467,5-hydroxy-L-tryptophan decarboxylase activity; GO:0036468,L-dopa decarboxylase activity; GO:0030170,pyridoxal phosphate binding; GO:0004837,tyrosine decarboxylase activity; GO:0006520,cellular amino acid metabolic process; GO:0003674,molecular_function; GO:0003824,catalytic activity; GO:0004058,aromatic-L-amino-acid decarboxylase activity; GO:0016829,lyase activity; GO:0016830,carbon-c…	PF00282.22:Pyridoxal-dependent decarboxylase conserved domain
IFM89_023101	K13383 (RS)-norcoclaurine 6-O-methyltransferase [EC:2.1.1.128] | (RefSeq) (RS)-norcoclaurine 6-O-methyltransferase-like (A)	ko00950: Isoquinoline alkaloid biosynthesis; ko01100: Metabolic pathways; ko01110: Biosynthesis of secondary metabolites	hypothetical protein IFM89_023101 [Coptis chinensis]	6OMT_COPJA RecName: Full=(RS)-norcoclaurine 6-O-methyltransferase; EC=2.1.1.128; AltName: Full=S-adenosyl-L-methionine:norcoclaurine 6-O-methyltransferase; Short=6-OMT;	A0A835HXA6_9MAGN SubName: Full=Uncharacterized protein {ECO:0000313|EMBL:KAF9606078.1};	Hydroxyindole-O-methyltransferase and related SAM-dependent methyltransferases	GO:0030786,(RS)-norcoclaurine 6-O-methyltransferase activity; GO:0008171,O-methyltransferase activity; GO:0046983,protein dimerization activity; GO:0032259,methylation; GO:0003674,molecular_function; GO:0003824,catalytic activity; GO:0008168,methyltransferase activity; GO:0008757,S-adenosylmethionine-dependent methyltransferase activity; GO:0016740,transferase activity; GO:0016741,transferase act…	PF00891.21:O-methyltransferase domain
IFM89_016616	K12120 phytochrome A | (RefSeq) PHYA; phytochrome A (A)	ko04712: Circadian rhythm - plant	hypothetical protein IFM89_016616 [Coptis chinensis]	PHYA_LATSA RecName: Full=Phytochrome type A;	A0A835IRT0_9MAGN SubName: Full=Uncharacterized protein {ECO:0000313|EMBL:KAF9621122.1};	--	GO:0000155,phosphorelay sensor kinase activity; GO:0009881,photoreceptor activity; GO:0042803,protein homodimerization activity; GO:0009584,detection of visible light; GO:0017006,protein-tetrapyrrole linkage; GO:0009585,red, far-red light phototransduction; GO:0006355,regulation of DNA-templated transcription; GO:0003674,molecular_function; GO:0003824,catalytic activity; GO:0004672,protein kinase…	PF00360.23:Phytochrome region
IFM89_038314	K11673 actin-related protein 8 | (RefSeq) actin-related protein 9-like (A)	--	hypothetical protein IFM89_038314 [Coptis chinensis]	--	A0A835M655_9MAGN SubName: Full=Uncharacterized protein {ECO:0000313|EMBL:KAF9612131.1};	--	GO:0016021,integral component of membrane; GO:0005575,cellular_component; GO:0016020,membrane; GO:0031224,intrinsic component of membrane; GO:0110165,cellular anatomical entity	PF05514.14:HR-like lesion-inducing
IFM89_015541	K12819 pre-mRNA-processing factor SLU7 | (RefSeq) pre-mRNA-splicing factor SLU7 (A)	ko03040: Spliceosome	hypothetical protein IFM89_015541 [Coptis chinensis]	SLU7_ORYSI RecName: Full=Pre-mRNA-splicing factor SLU7;	A0A835M3F5_9MAGN RecName: Full=Pre-mRNA-splicing factor SLU7 {ECO:0000256|RuleBase:RU367071};	RNA splicing factor - Slu7p	GO:0005681,spliceosomal complex; GO:0046872,metal ion binding; GO:0030628,pre-mRNA 3'-splice site binding; GO:0000398,mRNA splicing, via spliceosome; GO:0003674,molecular_function; GO:0005488,binding; GO:0043167,ion binding; GO:0043169,cation binding; GO:0003676,nucleic acid binding; GO:0003723,RNA binding; GO:0036002,pre-mRNA binding; GO:0097159,organic cyclic compound binding; GO:1901363,hetero…	PF11708.11:Pre-mRNA splicing Prp18-interacting factor
IFM89_023100	K13385 N-methylcoclaurine 3'-monooxygenase [EC:1.14.14.102] | (RefSeq) (S)-N-methylcoclaurine 3'-hydroxylase isozyme 1 (A)	ko00950: Isoquinoline alkaloid biosynthesis; ko01100: Metabolic pathways; ko01110: Biosynthesis of secondary metabolites	hypothetical protein IFM89_023100 [Coptis chinensis]	C80B2_COPJA RecName: Full=Probable (S)-N-methylcoclaurine 3'-hydroxylase isozyme 2; EC=1.14.14.102 {ECO:0000250|UniProtKB:O64899}; AltName: Full=Cytochrome P450 80B2;	A0A835HXA4_9MAGN SubName: Full=Uncharacterized protein {ECO:0000313|EMBL:KAF9606077.1};	Cytochrome P450 CYP2 subfamily	GO:0005789,endoplasmic reticulum membrane; GO:0016021,integral component of membrane; GO:0020037,heme binding; GO:0005506,iron ion binding; GO:0050593,N-methylcoclaurine 3'-monooxygenase activity; GO:0019438,aromatic compound biosynthetic process; GO:1901362,organic cyclic compound biosynthetic process; GO:0003674,molecular_function; GO:0005488,binding; GO:0046906,tetrapyrrole binding; GO:0097159…	PF00067.25:Cytochrome P450
IFM89_010054	K23136 fraxetin 5-hydroxylase [EC:1.14.14.164] | (RefSeq) uncharacterized LOC105769156 (A)	ko00999: Biosynthesis of various plant secondary metabolites; ko01110: Biosynthesis of secondary metabolites	hypothetical protein IFM89_010054 [Coptis chinensis]	C82D6_SINHE RecName: Full=Demethylepipodophyllotoxin synthase {ECO:0000303|PubMed:26359402}; EC=1.14.14.132 {ECO:0000269|PubMed:26359402}; AltName: Full=Cytochrome P450 family 82 subfamily D polypeptide 61 {ECO:0000303|PubMed:26359402};	A0A835HP96_9MAGN SubName: Full=Uncharacterized protein {ECO:0000313|EMBL:KAF9600568.1};	Cytochrome P450 CYP2 subfamily	GO:0016021,integral component of membrane; GO:0020037,heme binding; GO:0005506,iron ion binding; GO:0004497,monooxygenase activity; GO:0016705,oxidoreductase activity, acting on paired donors, with incorporation or reduction of molecular oxygen; GO:0019438,aromatic compound biosynthetic process; GO:0009699,phenylpropanoid biosynthetic process; GO:0003674,molecular_function; GO:0005488,binding; GO…	PF00067.25:Cytochrome P450
IFM89_003751	K16190 glucuronokinase [EC:2.7.1.43] | (RefSeq) transcription factor TDR (A)	ko00040: Pentose and glucuronate interconversions; ko00053: Ascorbate and aldarate metabolism; ko00520: Amino sugar and nucleotide sugar metabolism; ko01100: Metabolic pathways; ko01250: Biosynthesis of nucleotide sugars	hypothetical protein IFM89_003751 [Coptis chinensis]	BH035_ARATH RecName: Full=Transcription factor bHLH35; AltName: Full=Basic helix-loop-helix protein 35; Short=AtbHLH35; Short=bHLH 35; AltName: Full=Transcription factor EN 41; AltName: Full=bHLH transcription factor bHLH035;	A0A835I8H3_9MAGN RecName: Full=BHLH domain-containing protein {ECO:0000259|PROSITE:PS50888};	--	GO:0005634,nucleus; GO:0003700,DNA-binding transcription factor activity; GO:0046983,protein dimerization activity; GO:0043565,sequence-specific DNA binding; GO:0006355,regulation of DNA-templated transcription; GO:0003674,molecular_function; GO:0140110,transcription regulator activity; GO:0005488,binding; GO:0005515,protein binding; GO:0003676,nucleic acid binding; GO:0003677,DNA binding; GO:009…	PF00010.29:Helix-loop-helix DNA-binding domain
IFM89_022703	K00521 ferric-chelate reductase [EC:1.16.1.7] | (RefSeq) ferric reduction oxidase 7, chloroplastic-like (A)	--	hypothetical protein IFM89_022703 [Coptis chinensis]	NAC17_ARATH RecName: Full=NAC domain-containing protein 17 {ECO:0000303|PubMed:15029955}; Short=ANAC017 {ECO:0000303|PubMed:15029955}; AltName: Full=Protein NTM1-like 7 {ECO:0000303|PubMed:17158162}; AltName: Full=Protein REGULATORS OF AOX1A 2 {ECO:0000303|PubMed:24045017};	A0A835HMS0_9MAGN RecName: Full=NAC domain-containing protein {ECO:0000259|PROSITE:PS51005};	--	GO:0005789,endoplasmic reticulum membrane; GO:0016021,integral component of membrane; GO:0005634,nucleus; GO:0003700,DNA-binding transcription factor activity; GO:0000976,transcription cis-regulatory region binding; GO:0070301,cellular response to hydrogen peroxide; GO:0010150,leaf senescence; GO:0031930,mitochondria-nucleus signaling pathway; GO:0045893,positive regulation of DNA-templated trans…	PF02365.18:No apical meristem (NAM) protein
novel.2349	K13356 alcohol-forming fatty acyl-CoA reductase [EC:1.2.1.84] | (RefSeq) fatty acyl-CoA reductase 2 (A)	ko00073: Cutin, suberine and wax biosynthesis; ko04146: Peroxisome	hypothetical protein IFM89_012554 [Coptis chinensis]	FACR2_ARATH RecName: Full=Fatty acyl-CoA reductase 2, chloroplastic {ECO:0000305|PubMed:19062129}; Short=AtFAR2 {ECO:0000303|PubMed:27274541}; EC=1.2.1.84 {ECO:0000269|PubMed:19062129, ECO:0000269|PubMed:21813653, ECO:0000269|PubMed:27274541}; AltName: Full=Fatty acid reductase 2 {ECO:0000303|PubMed:8390620}; AltName: Full=Male sterility protein 2 {ECO:0000303|PubMed:9351246}; Flags: Precursor;	A0A835H4M8_9MAGN RecName: Full=Fatty acyl-CoA reductase {ECO:0000256|RuleBase:RU363097}; EC=1.2.1.84 {ECO:0000256|RuleBase:RU363097};	Acyl-CoA reductase	GO:0009507,chloroplast; GO:0043231,intracellular membrane-bounded organelle; GO:0102965,alcohol-forming fatty acyl-CoA reductase activity; GO:0080019,fatty-acyl-CoA reductase (alcohol-forming) activity; GO:0016628,oxidoreductase activity, acting on the CH-CH group of donors, NAD or NADP as acceptor; GO:1903175,fatty alcohol biosynthetic process; GO:0035336,long-chain fatty-acyl-CoA metabolic proc…	PF07993.15:Male sterility protein
IFM89_039615	K09753 cinnamoyl-CoA reductase [EC:1.2.1.44] | (RefSeq) cinnamoyl-CoA reductase 1-like (A)	ko00940: Phenylpropanoid biosynthesis; ko01100: Metabolic pathways; ko01110: Biosynthesis of secondary metabolites	hypothetical protein IFM89_039615, partial [Coptis chinensis]	CCR1_PETHY RecName: Full=Cinnamoyl-CoA reductase 1 {ECO:0000303|PubMed:24985707, ECO:0000303|PubMed:25217505}; Short=PhCCR1 {ECO:0000303|PubMed:24985707, ECO:0000303|PubMed:25217505}; EC=1.2.1.44 {ECO:0000250|UniProtKB:Q9S9N9}; AltName: Full=Coniferylaldehyde synthase {ECO:0000305}; EC=1.2.1.- {ECO:0000269|PubMed:24985707, ECO:0000269|PubMed:25217505};	A0A835GVE8_9MAGN RecName: Full=Epimerase domain-containing protein {ECO:0000259|Pfam:PF01370};	Flavonol reductase/cinnamoyl-CoA reductase	GO:0005737,cytoplasm; GO:0016621,cinnamoyl-CoA reductase activity; GO:0000166,nucleotide binding; GO:0007623,circadian rhythm; GO:0010597,green leaf volatile biosynthetic process; GO:0009809,lignin biosynthetic process; GO:0009699,phenylpropanoid biosynthetic process; GO:0003674,molecular_function; GO:0003824,catalytic activity; GO:0016491,oxidoreductase activity; GO:0016620,oxidoreductase activi…	PF01370.24:NAD dependent epimerase/dehydratase family
IFM89_018355	--	--	hypothetical protein IFM89_018355 [Coptis chinensis]	--	A0A835HKX1_9MAGN RecName: Full=Extensin_2 domain-containing protein {ECO:0000259|Pfam:PF04554};	--	GO:0005199,structural constituent of cell wall; GO:0009664,plant-type cell wall organization; GO:0003674,molecular_function; GO:0005198,structural molecule activity; GO:0008150,biological_process; GO:0009987,cellular process; GO:0016043,cellular component organization; GO:0045229,external encapsulating structure organization; GO:0071554,cell wall organization or biogenesis; GO:0071555,cell wall o…	--
IFM89_037826	K02959 small subunit ribosomal protein S16 | (RefSeq) 30S ribosomal protein S16-2, chloroplastic/mitochondrial-like (A)	ko03010: Ribosome	hypothetical protein IFM89_037826 [Coptis chinensis]	RS16B_ARATH RecName: Full=30S ribosomal protein S16-2, chloroplastic/mitochondrial {ECO:0000303|PubMed:18453549}; Flags: Precursor;	A0A835HMT4_9MAGN SubName: Full=Uncharacterized protein {ECO:0000313|EMBL:KAF9603740.1};	Mitochondrial/chloroplast ribosomal protein S16	GO:0009507,chloroplast; GO:0005739,mitochondrion; GO:0009536,plastid; GO:0015935,small ribosomal subunit; GO:0003735,structural constituent of ribosome; GO:0006412,translation; GO:0003674,molecular_function; GO:0005198,structural molecule activity; GO:0006518,peptide metabolic process; GO:0006807,nitrogen compound metabolic process; GO:0008150,biological_process; GO:0008152,metabolic process; GO:…	--
IFM89_030333	K00131 glyceraldehyde-3-phosphate dehydrogenase (NADP+) [EC:1.2.1.9] | (RefSeq) NADP-dependent glyceraldehyde-3-phosphate dehydrogenase isoform X1 (A)	ko00010: Glycolysis / Gluconeogenesis; ko00030: Pentose phosphate pathway; ko01100: Metabolic pathways; ko01200: Carbon metabolism	hypothetical protein IFM89_030333 [Coptis chinensis]	GAPN_NICPL RecName: Full=NADP-dependent glyceraldehyde-3-phosphate dehydrogenase; EC=1.2.1.9; AltName: Full=Glyceraldehyde-3-phosphate dehydrogenase [NADP(+)]; AltName: Full=Non-phosphorylating glyceraldehyde 3-phosphate dehydrogenase; AltName: Full=Triosephosphate dehydrogenase;	A0A835IF79_9MAGN RecName: Full=Aldedh domain-containing protein {ECO:0000259|Pfam:PF00171};	Aldehyde dehydrogenase	GO:0005737,cytoplasm; GO:0008886,glyceraldehyde-3-phosphate dehydrogenase (NADP+) (non-phosphorylating) activity; GO:0003674,molecular_function; GO:0003824,catalytic activity; GO:0016491,oxidoreductase activity; GO:0016620,oxidoreductase activity, acting on the aldehyde or oxo group of donors, NAD or NADP as acceptor; GO:0016903,oxidoreductase activity, acting on the aldehyde or oxo group of dono…	PF00171.25:Aldehyde dehydrogenase family
IFM89_007361	K00297 methylenetetrahydrofolate reductase (NADH) [EC:1.5.1.54] | (RefSeq) methylenetetrahydrofolate reductase 1 (A)	ko00670: One carbon pool by folate; ko01100: Metabolic pathways; ko01200: Carbon metabolism	hypothetical protein IFM89_007361 [Coptis chinensis]	MTHR1_MAIZE RecName: Full=Methylenetetrahydrofolate reductase 1; EC=1.5.1.20; AltName: Full=ZmMTHFR1;	A0A835LLL7_9MAGN RecName: Full=Methylenetetrahydrofolate reductase {ECO:0000256|RuleBase:RU003862}; EC=1.5.1.20 {ECO:0000256|RuleBase:RU003862};	5,10-methylenetetrahydrofolate reductase	GO:0005829,cytosol; GO:0071949,FAD binding; GO:0004489,methylenetetrahydrofolate reductase (NAD(P)H) activity; GO:0106312,methylenetetrahydrofolate reductase NADH activity; GO:0106313,methylenetetrahydrofolate reductase NADPH activity; GO:0009086,methionine biosynthetic process; GO:0035999,tetrahydrofolate interconversion; GO:0000166,nucleotide binding; GO:0003674,molecular_function; GO:0005488,b…	PF02219.20:Methylenetetrahydrofolate reductase
IFM89_033148	K10781 fatty acyl-ACP thioesterase B [EC:3.1.2.14 3.1.2.21] | (RefSeq) uncharacterized protein LOC113347984 isoform X1 (A)	ko00061: Fatty acid biosynthesis; ko01100: Metabolic pathways; ko01212: Fatty acid metabolism	hypothetical protein IFM89_033148 [Coptis chinensis]	MLP31_ARATH RecName: Full=MLP-like protein 31;	A0A835HGV1_9MAGN RecName: Full=Bet_v_1 domain-containing protein {ECO:0000259|SMART:SM01037};	--	GO:0006952,defense response; GO:0006950,response to stress; GO:0008150,biological_process; GO:0050896,response to stimulus	PF00407.22:Pathogenesis-related protein Bet v 1 family
IFM89_035697	K14485 transport inhibitor response 1 | (RefSeq) protein TRANSPORT INHIBITOR RESPONSE 1-like (A)	ko04075: Plant hormone signal transduction	hypothetical protein IFM89_035697 [Coptis chinensis]	TIR1L_ARATH RecName: Full=Transport inhibitor response 1-like protein; Short=TIR1-like protein;	A0A835IVE5_9MAGN RecName: Full=F-box domain-containing protein {ECO:0000259|SMART:SM00256};	Leucine rich repeat proteins, some proteins contain F-box	GO:0005634,nucleus; GO:0019005,SCF ubiquitin ligase complex; GO:0010011,auxin binding; GO:0000822,inositol hexakisphosphate binding; GO:0009734,auxin-activated signaling pathway; GO:0016567,protein ubiquitination; GO:0031146,SCF-dependent proteasomal ubiquitin-dependent protein catabolic process; GO:0003674,molecular_function; GO:0005488,binding; GO:0042562,hormone binding; GO:0036094,small molec…	PF18791.4:Transport inhibitor response 1 protein domain
IFM89_038459	K12811 ATP-dependent RNA helicase DDX46/PRP5 [EC:3.6.4.13] | (RefSeq) DEAD-box ATP-dependent RNA helicase 42-like (A)	ko03040: Spliceosome	hypothetical protein IFM89_038459 [Coptis chinensis]	RH42_ARATH RecName: Full=DEAD-box ATP-dependent RNA helicase 42; EC=3.6.4.13; AltName: Full=DEAD-box RNA helicase RCF1; AltName: Full=REGULATOR OF CBF GENE EXPRESSION 1;	A0A835HBP9_9MAGN SubName: Full=Uncharacterized protein {ECO:0000313|EMBL:KAF9595307.1};	RNA helicase	GO:0005634,nucleus; GO:0005524,ATP binding; GO:0016887,ATP hydrolysis activity; GO:0003723,RNA binding; GO:0003724,RNA helicase activity; GO:0000398,mRNA splicing, via spliceosome; GO:0000166,nucleotide binding; GO:0003674,molecular_function; GO:0005488,binding; GO:0017076,purine nucleotide binding; GO:0030554,adenyl nucleotide binding; GO:0032553,ribonucleotide binding; GO:0032555,purine ribonuc…	PF00270.32:DEAD/DEAH box helicase
IFM89_019880	K22683 aspartyl protease family protein [EC:3.4.23.-] | (RefSeq) protein ASPARTIC PROTEASE IN GUARD CELL 1 (A)	--	hypothetical protein IFM89_019880 [Coptis chinensis]	ASPG1_ARATH RecName: Full=Protein ASPARTIC PROTEASE IN GUARD CELL 1; Short=AtASPG1; EC=3.4.23.-; Flags: Precursor;	A0A835LIM0_9MAGN RecName: Full=Peptidase A1 domain-containing protein {ECO:0000259|PROSITE:PS51767};	Aspartyl protease	GO:0005783,endoplasmic reticulum; GO:0004190,aspartic-type endopeptidase activity; GO:0070001,aspartic-type peptidase activity; GO:0003677,DNA binding; GO:0006508,proteolysis; GO:0009737,response to abscisic acid; GO:0009414,response to water deprivation; GO:0009627,systemic acquired resistance; GO:0003674,molecular_function; GO:0003824,catalytic activity; GO:0004175,endopeptidase activity; GO:00…	PF14543.9:Xylanase inhibitor N-terminal
IFM89_014779	K11498 centromeric protein E | (RefSeq) kinesin-like protein KIN-7D, mitochondrial (A)	--	hypothetical protein IFM89_014779 [Coptis chinensis]	KN7D_ARATH RecName: Full=Kinesin-like protein KIN-7D, mitochondrial {ECO:0000305}; AltName: Full=Mitochondria-targeted kinesin-related protein 2 {ECO:0000303|PubMed:11706156}; Flags: Precursor;	A0A835M8Z4_9MAGN SubName: Full=Uncharacterized protein {ECO:0000313|EMBL:KAF9620842.1};	Kinesin-like protein	GO:0005871,kinesin complex; GO:0005874,microtubule; GO:0005739,mitochondrion; GO:0005524,ATP binding; GO:0016887,ATP hydrolysis activity; GO:0046872,metal ion binding; GO:0008017,microtubule binding; GO:0003777,microtubule motor activity; GO:0007018,microtubule-based movement; GO:0031347,regulation of defense response; GO:0000166,nucleotide binding; GO:0003674,molecular_function; GO:0005488,bindi…	PF00225.26:Kinesin motor domain
IFM89_025630	K01809 mannose-6-phosphate isomerase [EC:5.3.1.8] | (RefSeq) mannose-6-phosphate isomerase 1-like isoform X1 (A)	ko00051: Fructose and mannose metabolism; ko00520: Amino sugar and nucleotide sugar metabolism; ko01100: Metabolic pathways; ko01110: Biosynthesis of secondary metabolites; ko01240: Biosynthesis of cofactors; ko01250: Biosynthesis of nucleotide sugars	hypothetical protein IFM89_025630 [Coptis chinensis]	MPI1_ARATH RecName: Full=Mannose-6-phosphate isomerase 1; EC=5.3.1.8 {ECO:0000269|PubMed:18755683}; AltName: Full=Phosphohexomutase 1; AltName: Full=Phosphomannose isomerase 1; Short=PMI1; AltName: Full=Protein MATERNAL EFFECT EMBRYO ARREST 31;	A0A835LGG9_9MAGN RecName: Full=Mannose-6-phosphate isomerase {ECO:0000256|ARBA:ARBA00011956, ECO:0000256|RuleBase:RU000611}; EC=5.3.1.8 {ECO:0000256|ARBA:ARBA00011956, ECO:0000256|RuleBase:RU000611};	Mannose-6-phosphate isomerase	GO:0005829,cytosol; GO:0004476,mannose-6-phosphate isomerase activity; GO:0008270,zinc ion binding; GO:0005975,carbohydrate metabolic process; GO:0009793,embryo development ending in seed dormancy; GO:0009298,GDP-mannose biosynthetic process; GO:0046686,response to cadmium ion; GO:0032025,response to cobalt ion; GO:0033591,response to L-ascorbic acid; GO:0009416,response to light stimulus; GO:001…	PF20511.1:Phosphomannose isomerase type I, catalytic domain
IFM89_037011	K22794 flavonol-3-O-glucoside/galactoside glucosyltransferase [EC:2.4.1.239 2.4.1.-] | (RefSeq) anthocyanidin 3-O-glucoside 2''-O-glucosyltransferase-like (A)	ko00944: Flavone and flavonol biosynthesis; ko01110: Biosynthesis of secondary metabolites	hypothetical protein IFM89_037011 [Coptis chinensis]	DUSKY_IPONI RecName: Full=Anthocyanidin 3-O-glucoside 2''-O-glucosyltransferase; EC=2.4.1.297; AltName: Full=3-O-glucoside-2''-O-glucosyltransferase; Short=In3GGT; AltName: Full=Protein dusky; Short=Dy;	A0A835HME5_9MAGN SubName: Full=Uncharacterized protein {ECO:0000313|EMBL:KAF9603530.1};	UDP-glucuronosyl and UDP-glucosyl transferase	GO:0102455,anthocyanidin 3-O-glucoside 2''-O-glucosyltransferase activity; GO:0016758,hexosyltransferase activity; GO:0008194,UDP-glycosyltransferase activity; GO:0009718,anthocyanin-containing compound biosynthetic process; GO:0043473,pigmentation; GO:0003674,molecular_function; GO:0003824,catalytic activity; GO:0016740,transferase activity; GO:0016757,glycosyltransferase activity; GO:0008150,bi…	PF03033.23:Glycosyltransferase family 28 N-terminal domain
IFM89_020866	K14494 DELLA protein | (RefSeq) DELLA protein GAI1-like (A)	ko04075: Plant hormone signal transduction	hypothetical protein IFM89_020866 [Coptis chinensis]	GAI1_VITVI RecName: Full=DELLA protein GAI1; AltName: Full=Gibberellic acid-insensitive mutant protein 1; AltName: Full=VvGAI1;	A0A835IUC4_9MAGN RecName: Full=DELLA protein {ECO:0000256|RuleBase:RU367159};	--	GO:0005634,nucleus; GO:0003712,transcription coregulator activity; GO:0009740,gibberellic acid mediated signaling pathway; GO:0003674,molecular_function; GO:0140110,transcription regulator activity; GO:0007154,cell communication; GO:0007165,signal transduction; GO:0008150,biological_process; GO:0009719,response to endogenous stimulus; GO:0009725,response to hormone; GO:0009739,response to gibbere…	PF03514.17:GRAS domain family
IFM89_029976	--	--	hypothetical protein IFM89_029976 [Coptis chinensis]	PDCT1_ARATH RecName: Full=Phosphatidylcholine:diacylglycerol cholinephosphotransferase 1 {ECO:0000305}; Short=AtPDCT1 {ECO:0000305}; EC=2.7.8.- {ECO:0000269|PubMed:19833868}; AltName: Full=Protein REDUCED OLEATE DESATURATION 1 {ECO:0000303|PubMed:19833868};	A0A835IEI7_9MAGN SubName: Full=Uncharacterized protein {ECO:0000313|EMBL:KAF9616515.1};	--	GO:0016021,integral component of membrane; GO:0004142,diacylglycerol cholinephosphotransferase activity; GO:0046470,phosphatidylcholine metabolic process; GO:0003674,molecular_function; GO:0003824,catalytic activity; GO:0016740,transferase activity; GO:0016772,transferase activity, transferring phosphorus-containing groups; GO:0016780,phosphotransferase activity, for other substituted phosphate g…	PF14378.9:PAP2 superfamily
novel.2751	K16871 4-aminobutyrate---pyruvate transaminase [EC:2.6.1.96] | (Kazusa) Lj3g3v3569310.2; - (A)	ko00250: Alanine, aspartate and glutamate metabolism; ko00650: Butanoate metabolism; ko01100: Metabolic pathways	hypothetical protein Ahy_B03g067675 [Arachis hypogaea]	GATP1_ORYSI RecName: Full=Gamma-aminobutyrate transaminase 1, mitochondrial; EC=2.6.1.96; Flags: Precursor;	A0A445A7Q0_ARAHY SubName: Full=Uncharacterized protein {ECO:0000313|EMBL:RYR22395.1};	Alanine-glyoxylate aminotransferase AGT2	GO:0005739,mitochondrion; GO:0034387,4-aminobutyrate:pyruvate transaminase activity; GO:0102351,gamma-aminobutyrate transaminase (glyoxylate dependent) activity; GO:0030170,pyridoxal phosphate binding; GO:0003674,molecular_function; GO:0003824,catalytic activity; GO:0003867,4-aminobutyrate transaminase activity; GO:0008483,transaminase activity; GO:0016740,transferase activity; GO:0016769,transfe…	--
IFM89_030786	K01968 3-methylcrotonyl-CoA carboxylase alpha subunit [EC:6.4.1.4] | (RefSeq) methylcrotonoyl-CoA carboxylase subunit alpha, mitochondrial-like isoform X1 (A)	ko00280: Valine, leucine and isoleucine degradation; ko01100: Metabolic pathways	hypothetical protein IFM89_030786 [Coptis chinensis]	STY13_ARATH RecName: Full=Serine/threonine-protein kinase STY13 {ECO:0000305}; EC=2.7.11.1 {ECO:0000269|PubMed:16429265}; AltName: Full=AtSTYPK {ECO:0000303|PubMed:17291444}; AltName: Full=Serine/threonine/tyrosine-protein kinase 13 {ECO:0000303|PubMed:16429265};	A0A835IHN3_9MAGN RecName: Full=Protein kinase domain-containing protein {ECO:0000259|PROSITE:PS50011};	Tyrosine kinase specific for activated (GTP-bound) p21cdc42Hs	GO:0005737,cytoplasm; GO:0005524,ATP binding; GO:0004672,protein kinase activity; GO:0106310,protein serine kinase activity; GO:0004674,protein serine/threonine kinase activity; GO:0004712,protein serine/threonine/tyrosine kinase activity; GO:0004713,protein tyrosine kinase activity; GO:0006468,protein phosphorylation; GO:0045995,regulation of embryonic development; GO:0010344,seed oilbody biogen…	PF07714.20:Protein tyrosine and serine/threonine kinase
IFM89_026431	--	--	hypothetical protein IFM89_026431, partial [Coptis chinensis]	LHW_ARATH RecName: Full=Transcription factor LHW; AltName: Full=BHLH transcription factor delta; Short=bHLH delta; AltName: Full=Basic helix-loop-helix protein 156; Short=AtbHLH156; Short=bHLH 156; AltName: Full=Protein LONESOME HIGHWAY; AltName: Full=bHLH transcription factor bHLH156;	A0A835HPQ1_9MAGN RecName: Full=BHLH domain-containing protein {ECO:0000259|PROSITE:PS50888}; Flags: Fragment;	--	GO:0005634,nucleus; GO:0003677,DNA binding; GO:0003700,DNA-binding transcription factor activity; GO:0042803,protein homodimerization activity; GO:0010078,maintenance of root meristem identity; GO:0045893,positive regulation of DNA-templated transcription; GO:0006355,regulation of DNA-templated transcription; GO:0048364,root development; GO:0010479,stele development; GO:0010089,xylem development;…	PF14215.9:bHLH-MYC and R2R3-MYB transcription factors N-terminal
IFM89_002801	K13396 (S)-tetrahydroprotoberberine N-methyltransferase [EC:2.1.1.122] | (RefSeq) (S)-tetrahydroprotoberberine N-methyltransferase-like (A)	ko00950: Isoquinoline alkaloid biosynthesis; ko01100: Metabolic pathways; ko01110: Biosynthesis of secondary metabolites	hypothetical protein IFM89_002801 [Coptis chinensis]	TNMT_ESCCA RecName: Full=(S)-tetrahydroprotoberberine N-methyltransferase; Short=EcTNMT; EC=2.1.1.122;	A0A835HQW2_9MAGN SubName: Full=Uncharacterized protein {ECO:0000313|EMBL:KAF9604126.1};	--	GO:0005737,cytoplasm; GO:0030782,(S)-tetrahydroprotoberberine N-methyltransferase activity; GO:0032259,methylation; GO:0003674,molecular_function; GO:0003824,catalytic activity; GO:0008168,methyltransferase activity; GO:0008757,S-adenosylmethionine-dependent methyltransferase activity; GO:0016740,transferase activity; GO:0016741,transferase activity, transferring one-carbon groups; GO:0008150,bio…	PF02353.23:Mycolic acid cyclopropane synthetase
IFM89_033569	K00815 tyrosine aminotransferase [EC:2.6.1.5] | (RefSeq) probable aminotransferase TAT2 (A)	ko00130: Ubiquinone and other terpenoid-quinone biosynthesis; ko00270: Cysteine and methionine metabolism; ko00350: Tyrosine metabolism; ko00360: Phenylalanine metabolism; ko00400: Phenylalanine, tyrosine and tryptophan biosynthesis; ko00950: Isoquinoline alkaloid biosynthesis; ko00960: Tropane, piperidine and pyridine alkaloid biosynthesis; ko01100: Metabolic pathways; ko01110: Biosynthesis of s…	hypothetical protein IFM89_033569 [Coptis chinensis]	TAT2_ARATH RecName: Full=Probable aminotransferase TAT2; EC=2.6.1.-; AltName: Full=Tyrosine aminotransferase 2;	A0A835I4P2_9MAGN RecName: Full=Aminotran_1_2 domain-containing protein {ECO:0000259|Pfam:PF00155};	Tyrosine aminotransferase	GO:0005829,cytosol; GO:0004838,L-tyrosine:2-oxoglutarate aminotransferase activity; GO:0030170,pyridoxal phosphate binding; GO:0006572,tyrosine catabolic process; GO:0010189,vitamin E biosynthetic process; GO:0003674,molecular_function; GO:0003824,catalytic activity; GO:0008483,transaminase activity; GO:0016740,transferase activity; GO:0016769,transferase activity, transferring nitrogenous groups…	PF00155.24:Aminotransferase class I and II
IFM89_006443	--	--	hypothetical protein IFM89_006443 [Coptis chinensis]	--	A0A835LV44_9MAGN RecName: Full=RRM domain-containing protein {ECO:0000259|PROSITE:PS50102};	--	GO:0003723,RNA binding; GO:0003674,molecular_function; GO:0003676,nucleic acid binding; GO:0005488,binding; GO:0097159,organic cyclic compound binding; GO:1901363,heterocyclic compound binding	PF00076.25:RNA recognition motif. (a.k.a. RRM, RBD, or RNP domain)
IFM89_016697	K15040 voltage-dependent anion channel protein 2 | (RefSeq) mitochondrial outer membrane protein porin 2-like (A)	--	hypothetical protein IFM89_016697 [Coptis chinensis]	VDAC2_ARATH RecName: Full=Mitochondrial outer membrane protein porin 2; AltName: Full=Voltage-dependent anion-selective channel protein 2; Short=AtVDAC2; Short=VDAC-2;	A0A835M686_9MAGN SubName: Full=Uncharacterized protein {ECO:0000313|EMBL:KAF9621203.1};	Porin/voltage-dependent anion-selective channel protein	GO:0005741,mitochondrial outer membrane; GO:0046930,pore complex; GO:0015288,porin activity; GO:0008308,voltage-gated anion channel activity; GO:0040008,regulation of growth; GO:0003674,molecular_function; GO:0005215,transporter activity; GO:0015267,channel activity; GO:0022803,passive transmembrane transporter activity; GO:0022829,wide pore channel activity; GO:0022857,transmembrane transporter …	PF01459.25:Eukaryotic porin
IFM89_028764	K10999 cellulose synthase A [EC:2.4.1.12] | (RefSeq) cellulose synthase A catalytic subunit 7 [UDP-forming] (A)	--	hypothetical protein IFM89_028764 [Coptis chinensis]	CSLE6_ORYSJ RecName: Full=Cellulose synthase-like protein E6; EC=2.4.1.-; AltName: Full=OsCslE6;	A0A835GYK1_9MAGN SubName: Full=Uncharacterized protein {ECO:0000313|EMBL:KAF9589829.1};	--	GO:0000139,Golgi membrane; GO:0016021,integral component of membrane; GO:0005886,plasma membrane; GO:0016760,cellulose synthase (UDP-forming) activity; GO:0051753,mannan synthase activity; GO:0071555,cell wall organization; GO:0030244,cellulose biosynthetic process; GO:0009833,plant-type primary cell wall biogenesis; GO:0003674,molecular_function; GO:0003824,catalytic activity; GO:0008194,UDP-gly…	PF03552.17:Cellulose synthase
IFM89_031971	K00487 trans-cinnamate 4-monooxygenase [EC:1.14.14.91] | (RefSeq) trans-cinnamate 4-monooxygenase (A)	ko00130: Ubiquinone and other terpenoid-quinone biosynthesis; ko00940: Phenylpropanoid biosynthesis; ko00941: Flavonoid biosynthesis; ko00945: Stilbenoid, diarylheptanoid and gingerol biosynthesis; ko01100: Metabolic pathways; ko01110: Biosynthesis of secondary metabolites	hypothetical protein IFM89_031971 [Coptis chinensis]	TCMO_POPKI RecName: Full=Trans-cinnamate 4-monooxygenase; EC=1.14.14.91 {ECO:0000250|UniProtKB:Q04468}; AltName: Full=Cinnamic acid 4-hydroxylase; Short=C4H; Short=CA4H; AltName: Full=Cytochrome P450 73; AltName: Full=Cytochrome P450C4H;	A0A835HGY4_9MAGN SubName: Full=Uncharacterized protein {ECO:0000313|EMBL:KAF9598851.1};	Cytochrome P450 CYP2 subfamily	GO:0016021,integral component of membrane; GO:0020037,heme binding; GO:0005506,iron ion binding; GO:0016710,trans-cinnamate 4-monooxygenase activity; GO:0003674,molecular_function; GO:0005488,binding; GO:0046906,tetrapyrrole binding; GO:0097159,organic cyclic compound binding; GO:1901363,heterocyclic compound binding; GO:0043167,ion binding; GO:0043169,cation binding; GO:0046872,metal ion binding…	PF00067.25:Cytochrome P450
IFM89_019641	--	--	hypothetical protein IFM89_019641 [Coptis chinensis]	Y3078_ARATH RecName: Full=BTB/POZ domain-containing protein At3g50780;	A0A835M434_9MAGN SubName: Full=Uncharacterized protein {ECO:0000313|EMBL:KAF9610001.1};	--	GO:0016567,protein ubiquitination; GO:0006807,nitrogen compound metabolic process; GO:0008150,biological_process; GO:0008152,metabolic process; GO:0019538,protein metabolic process; GO:0032446,protein modification by small protein conjugation; GO:0036211,protein modification process; GO:0043170,macromolecule metabolic process; GO:0043412,macromolecule modification; GO:0044238,primary metabolic pr…	PF00651.34:BTB/POZ domain
novel.3938	K10640 E3 ubiquitin-protein ligase RNF25 [EC:2.3.2.27] | (RefSeq) uncharacterized protein LOC118034067 (A)	--	hypothetical protein E3N88_44467 [Mikania micrantha]	--	A0A5N6LEB1_9ASTR SubName: Full=Uncharacterized protein {ECO:0000313|EMBL:KAD0312830.1};	--	--	--
IFM89_023651	K17285 methanethiol oxidase [EC:1.8.3.4] | (RefSeq) selenium-binding protein 2 (A)	ko00920: Sulfur metabolism; ko01100: Metabolic pathways	hypothetical protein IFM89_023651 [Coptis chinensis]	SEBP2_ARATH RecName: Full=Selenium-binding protein 2; AltName: Full=Protein EMBRYO SAC DEVELOPMENT ARREST 38;	A0A835HUZ0_9MAGN SubName: Full=Uncharacterized protein {ECO:0000313|EMBL:KAF9606196.1};	Selenium-binding protein	GO:0005829,cytosol; GO:0008430,selenium binding; GO:0010197,polar nucleus fusion; GO:0003674,molecular_function; GO:0005488,binding; GO:0000741,karyogamy; GO:0006996,organelle organization; GO:0006997,nucleus organization; GO:0007275,multicellular organism development; GO:0008150,biological_process; GO:0009553,embryo sac development; GO:0009559,embryo sac central cell differentiation; GO:0009561,…	PF05694.14:56kDa selenium binding protein (SBP56)
IFM89_012660	K05294 GPI inositol-deacylase [EC:3.-.-.-] | (RefSeq) uncharacterized LOC104597479 (A)	ko00563: Glycosylphosphatidylinositol (GPI)-anchor biosynthesis; ko01100: Metabolic pathways	hypothetical protein IFM89_012660 [Coptis chinensis]	--	A0A835LLY6_9MAGN RecName: Full=GPI inositol-deacylase {ECO:0000256|RuleBase:RU365011}; EC=3.1.-.- {ECO:0000256|RuleBase:RU365011};	Negative regulator of COPII vesicle formation	GO:0005789,endoplasmic reticulum membrane; GO:0016021,integral component of membrane; GO:0016788,hydrolase activity, acting on ester bonds; GO:0015031,protein transport; GO:0003674,molecular_function; GO:0003824,catalytic activity; GO:0016787,hydrolase activity; GO:0006810,transport; GO:0008104,protein localization; GO:0008150,biological_process; GO:0009987,cellular process; GO:0033036,macromolec…	PF07819.16:PGAP1-like protein
IFM89_023660	K09419 heat shock transcription factor, other eukaryote | (RefSeq) heat stress transcription factor A-5 (A)	--	hypothetical protein IFM89_023660 [Coptis chinensis]	HSFA5_ARATH RecName: Full=Heat stress transcription factor A-5; Short=AtHsfA5; AltName: Full=AtHsf-12;	A0A835LSS6_9MAGN RecName: Full=HSF_DOMAIN domain-containing protein {ECO:0000259|PROSITE:PS00434};	Heat shock transcription factor	GO:0005737,cytoplasm; GO:0005634,nucleus; GO:0003700,DNA-binding transcription factor activity; GO:0000978,RNA polymerase II cis-regulatory region sequence-specific DNA binding; GO:0034605,cellular response to heat; GO:0006357,regulation of transcription by RNA polymerase II; GO:0003674,molecular_function; GO:0140110,transcription regulator activity; GO:0000976,transcription cis-regulatory region…	PF00447.20:HSF-type DNA-binding
IFM89_003847	K00521 ferric-chelate reductase [EC:1.16.1.7] | (RefSeq) ferric reduction oxidase 7, chloroplastic-like (A)	--	hypothetical protein IFM89_003847 [Coptis chinensis]	NAP2_SOLLC RecName: Full=NAC domain-containing protein 2 {ECO:0000303|PubMed:29760199}; Short=SlNAP2 {ECO:0000303|PubMed:29760199};	A0A835IWU2_9MAGN RecName: Full=NAC domain-containing protein {ECO:0000259|PROSITE:PS51005};	--	GO:0005634,nucleus; GO:0043565,sequence-specific DNA binding; GO:1902265,abscisic acid homeostasis; GO:0009738,abscisic acid-activated signaling pathway; GO:0010150,leaf senescence; GO:0031155,regulation of reproductive fruiting body development; GO:0006355,regulation of DNA-templated transcription; GO:0009737,response to abscisic acid; GO:0009646,response to absence of light; GO:0003674,molecula…	PF02365.18:No apical meristem (NAM) protein
IFM89_030686	K07300 Ca2+:H+ antiporter | (RefSeq) vacuolar cation/proton exchanger 2-like isoform X1 (A)	--	hypothetical protein IFM89_030686 [Coptis chinensis]	NCL_ARATH RecName: Full=Sodium/calcium exchanger NCL {ECO:0000305}; AltName: Full=Na(+)/Ca(2+)-exchange protein NCL {ECO:0000305}; AltName: Full=Protein NCX-like {ECO:0000303|PubMed:23148213}; Short=AtNCL {ECO:0000303|PubMed:23148213};	A0A835LXN1_9MAGN SubName: Full=Uncharacterized protein {ECO:0000313|EMBL:KAF9611350.1};	--	GO:0016021,integral component of membrane; GO:0016020,membrane; GO:0000325,plant-type vacuole; GO:0005886,plasma membrane; GO:0009506,plasmodesma; GO:0005774,vacuolar membrane; GO:0005773,vacuole; GO:0005509,calcium ion binding; GO:0015369,calcium:proton antiporter activity; GO:0005432,calcium:sodium antiporter activity; GO:0003729,mRNA binding; GO:0055074,calcium ion homeostasis; GO:0070588,calc…	PF01699.27:Sodium/calcium exchanger protein
IFM89_002797	K14975 codeine 3-O-demethylase [EC:1.14.11.32] | (RefSeq) codeine O-demethylase (A)	ko00950: Isoquinoline alkaloid biosynthesis; ko01100: Metabolic pathways; ko01110: Biosynthesis of secondary metabolites	hypothetical protein IFM89_002797 [Coptis chinensis]	NCS1_COPJA RecName: Full=S-norcoclaurine synthase 1; Short=CjNCS1; EC=4.2.1.78;	A0A835HTU1_9MAGN RecName: Full=Fe2OG dioxygenase domain-containing protein {ECO:0000259|PROSITE:PS51471};	Iron/ascorbate family oxidoreductases	GO:0050474,(S)-norcoclaurine synthase activity; GO:0046872,metal ion binding; GO:0016491,oxidoreductase activity; GO:0009820,alkaloid metabolic process; GO:0003674,molecular_function; GO:0003824,catalytic activity; GO:0016829,lyase activity; GO:0016835,carbon-oxygen lyase activity; GO:0016836,hydro-lyase activity; GO:0005488,binding; GO:0043167,ion binding; GO:0043169,cation binding; GO:0006807,n…	PF03171.23:2OG-Fe(II) oxygenase superfamily
IFM89_003734	K01626 3-deoxy-7-phosphoheptulonate synthase [EC:2.5.1.54] | (RefSeq) phospho-2-dehydro-3-deoxyheptonate aldolase 2, chloroplastic-like (A)	ko00400: Phenylalanine, tyrosine and tryptophan biosynthesis; ko01100: Metabolic pathways; ko01110: Biosynthesis of secondary metabolites; ko01230: Biosynthesis of amino acids	hypothetical protein IFM89_003734 [Coptis chinensis]	AROG1_PETHY RecName: Full=Phospho-2-dehydro-3-deoxyheptonate aldolase 1, chloroplastic {ECO:0000305}; EC=2.5.1.54 {ECO:0000250|UniProtKB:O53512}; AltName: Full=3-deoxy-D-arabino-heptulosonate 7-phosphate synthase 1 {ECO:0000303|PubMed:23275577, ECO:0000303|PubMed:24815009}; Short=DAHP synthase 1 {ECO:0000305}; Short=PhDAHP1 {ECO:0000303|PubMed:24815009}; AltName: Full=Phospho-2-keto-3-deoxyhepton…	A0A835HXE8_9MAGN RecName: Full=Phospho-2-dehydro-3-deoxyheptonate aldolase {ECO:0000256|RuleBase:RU363071}; EC=2.5.1.54 {ECO:0000256|RuleBase:RU363071};	--	GO:0009507,chloroplast; GO:0003849,3-deoxy-7-phosphoheptulonate synthase activity; GO:0046872,metal ion binding; GO:0009073,aromatic amino acid family biosynthetic process; GO:0008652,cellular amino acid biosynthetic process; GO:0009423,chorismate biosynthetic process; GO:0010597,green leaf volatile biosynthetic process; GO:0003674,molecular_function; GO:0003824,catalytic activity; GO:0016740,tra…	PF01474.19:Class-II DAHP synthetase family
novel.3049	K05387 glutamate receptor, ionotropic, plant | (RefSeq) glutamate receptor 1.3-like (A)	--	hypothetical protein AQUCO_01000388v1 [Aquilegia coerulea]	--	A0A2G5E9N6_AQUCA SubName: Full=Uncharacterized protein {ECO:0000313|EMBL:PIA52472.1};	--	GO:0016021,integral component of membrane; GO:0005575,cellular_component; GO:0016020,membrane; GO:0031224,intrinsic component of membrane; GO:0110165,cellular anatomical entity	--
IFM89_007051	K14485 transport inhibitor response 1 | (RefSeq) protein TRANSPORT INHIBITOR RESPONSE 1-like (A)	ko04075: Plant hormone signal transduction	hypothetical protein IFM89_007051 [Coptis chinensis]	TIR1L_ARATH RecName: Full=Transport inhibitor response 1-like protein; Short=TIR1-like protein;	A0A835HLR7_9MAGN SubName: Full=Uncharacterized protein {ECO:0000313|EMBL:KAF9600333.1};	Leucine rich repeat proteins, some proteins contain F-box	GO:0005634,nucleus; GO:0019005,SCF ubiquitin ligase complex; GO:0010011,auxin binding; GO:0000822,inositol hexakisphosphate binding; GO:0009734,auxin-activated signaling pathway; GO:0016567,protein ubiquitination; GO:0031146,SCF-dependent proteasomal ubiquitin-dependent protein catabolic process; GO:0003674,molecular_function; GO:0005488,binding; GO:0042562,hormone binding; GO:0036094,small molec…	PF18791.4:Transport inhibitor response 1 protein domain
IFM89_030194	K10256 omega-6 fatty acid desaturase / acyl-lipid omega-6 desaturase (Delta-12 desaturase) [EC:1.14.19.6 1.14.19.22] | (RefSeq) delta(12)-fatty-acid desaturase FAD2 (A)	ko01040: Biosynthesis of unsaturated fatty acids; ko01100: Metabolic pathways; ko01212: Fatty acid metabolism	hypothetical protein IFM89_030194 [Coptis chinensis]	FAD2_VERFO RecName: Full=Delta(12)-fatty-acid desaturase FAD2 {ECO:0000303|PubMed:12481086}; EC=1.14.19.6 {ECO:0000269|PubMed:12481086};	A0A835LNV4_9MAGN SubName: Full=Uncharacterized protein {ECO:0000313|EMBL:KAF9602588.1};	--	GO:0005789,endoplasmic reticulum membrane; GO:0016021,integral component of membrane; GO:0102985,delta12-fatty-acid desaturase activity; GO:0102987,palmitoleic acid delta 12 desaturase activity; GO:0006636,unsaturated fatty acid biosynthetic process; GO:0003674,molecular_function; GO:0003824,catalytic activity; GO:0016491,oxidoreductase activity; GO:0016705,oxidoreductase activity, acting on pair…	PF00487.27:Fatty acid desaturase
IFM89_035656	K13435 serine/threonine-protein kinase Pto | (RefSeq) Pto; serine/threonine protein kinase Pto (A)	ko04626: Plant-pathogen interaction	hypothetical protein IFM89_035656 [Coptis chinensis]	Y3037_ARATH RecName: Full=Probable inactive leucine-rich repeat receptor-like protein kinase At3g03770; Flags: Precursor;	A0A835LNN9_9MAGN RecName: Full=Protein kinase domain-containing protein {ECO:0000259|PROSITE:PS50011};	--	GO:0016021,integral component of membrane; GO:0005886,plasma membrane; GO:0005524,ATP binding; GO:0004672,protein kinase activity; GO:0046777,protein autophosphorylation; GO:0000166,nucleotide binding; GO:0003674,molecular_function; GO:0005488,binding; GO:0017076,purine nucleotide binding; GO:0030554,adenyl nucleotide binding; GO:0032553,ribonucleotide binding; GO:0032555,purine ribonucleotide bi…	PF00069.28:Protein kinase domain
IFM89_034510	K09338 homeobox-leucine zipper protein | (RefSeq) homeobox-leucine zipper protein HAT4-like (A)	--	hypothetical protein IFM89_034510 [Coptis chinensis]	HAT4_ARATH RecName: Full=Homeobox-leucine zipper protein HAT4; AltName: Full=HD-ZIP protein ATHB-2; AltName: Full=Homeodomain transcription factor ATHB-2; AltName: Full=Homeodomain-leucine zipper protein HAT4; Short=HD-ZIP protein 4;	A0A835HRY2_9MAGN RecName: Full=Homeobox domain-containing protein {ECO:0000259|PROSITE:PS50071};	Transcription factor HEX, contains HOX and HALZ domains	GO:0005634,nucleus; GO:0003700,DNA-binding transcription factor activity; GO:0000981,DNA-binding transcription factor activity, RNA polymerase II-specific; GO:0042803,protein homodimerization activity; GO:0043565,sequence-specific DNA binding; GO:0010311,lateral root formation; GO:0045892,negative regulation of DNA-templated transcription; GO:0010017,red or far-red light signaling pathway; GO:000…	PF04618.15:HD-ZIP protein N terminus
IFM89_011384	K10666 E3 ubiquitin-protein ligase RNF5 [EC:2.3.2.27] | (RefSeq) E3 ubiquitin-protein ligase RMA1H1-like (A)	ko04141: Protein processing in endoplasmic reticulum	hypothetical protein IFM89_011384 [Coptis chinensis]	RMA3_ARATH RecName: Full=E3 ubiquitin-protein ligase RMA3; EC=2.3.2.27; AltName: Full=Protein RING membrane-anchor 3; AltName: Full=RING-type E3 ubiquitin transferase RMA3 {ECO:0000305};	A0A835LM48_9MAGN RecName: Full=RING-type E3 ubiquitin transferase {ECO:0000256|ARBA:ARBA00012483}; EC=2.3.2.27 {ECO:0000256|ARBA:ARBA00012483};	Predicted E3 ubiquitin ligase	GO:0005783,endoplasmic reticulum; GO:0005789,endoplasmic reticulum membrane; GO:0016021,integral component of membrane; GO:0046872,metal ion binding; GO:0061630,ubiquitin protein ligase activity; GO:0044390,ubiquitin-like protein conjugating enzyme binding; GO:0004842,ubiquitin-protein transferase activity; GO:0071456,cellular response to hypoxia; GO:0071712,ER-associated misfolded protein catabo…	PF00097.28:Zinc finger, C3HC4 type (RING finger)
IFM89_031810	K23869 galactan beta-1,4-galactosyltransferase [EC:2.4.1.-] | (RefSeq) galactan beta-1,4-galactosyltransferase GALS1 (A)	--	hypothetical protein IFM89_031810 [Coptis chinensis]	GALS1_ARATH RecName: Full=Galactan beta-1,4-galactosyltransferase GALS1 {ECO:0000305}; EC=2.4.1.- {ECO:0000305}; AltName: Full=Beta-1,4-galactan synthase; AltName: Full=Galactan synthase 1 {ECO:0000303|PubMed:23243126};	A0A835HNW8_9MAGN RecName: Full=Glycosyltransferase family 92 protein {ECO:0000256|RuleBase:RU366017}; EC=2.4.1.- {ECO:0000256|RuleBase:RU366017};	Extracellular protein with conserved cysteines	GO:0005794,Golgi apparatus; GO:0000139,Golgi membrane; GO:0016021,integral component of membrane; GO:0003831,beta-N-acetylglucosaminylglycopeptide beta-1,4-galactosyltransferase activity; GO:0042546,cell wall biogenesis; GO:0071555,cell wall organization; GO:0045489,pectin biosynthetic process; GO:0003674,molecular_function; GO:0003824,catalytic activity; GO:0008194,UDP-glycosyltransferase activi…	PF01697.30:Glycosyltransferase family 92
IFM89_032761	--	--	hypothetical protein IFM89_032761, partial [Coptis chinensis]	--	A0A835HIG4_9MAGN SubName: Full=Uncharacterized protein {ECO:0000313|EMBL:KAF9598907.1}; Flags: Fragment;	--	--	PF07797.17:Protein of unknown function (DUF1639)
IFM89_020489	K12135 zinc finger protein CONSTANS | (RefSeq) zinc finger protein CONSTANS-like (A)	ko04712: Circadian rhythm - plant	hypothetical protein IFM89_020489 [Coptis chinensis]	COL16_ARATH RecName: Full=Zinc finger protein CONSTANS-LIKE 16;	A0A835H7V3_9MAGN SubName: Full=Uncharacterized protein {ECO:0000313|EMBL:KAF9593193.1};	GATA-4/5/6 transcription factors	GO:0005634,nucleus; GO:0003700,DNA-binding transcription factor activity; GO:0008270,zinc ion binding; GO:0006355,regulation of DNA-templated transcription; GO:0003674,molecular_function; GO:0140110,transcription regulator activity; GO:0005488,binding; GO:0043167,ion binding; GO:0043169,cation binding; GO:0046872,metal ion binding; GO:0046914,transition metal ion binding; GO:0006139,nucleobase-co…	PF06203.17:CCT motif
IFM89_002045	K13070 momilactone-A synthase [EC:1.1.1.295] | (RefSeq) momilactone A synthase (A)	ko00904: Diterpenoid biosynthesis; ko01110: Biosynthesis of secondary metabolites	hypothetical protein IFM89_002045 [Coptis chinensis]	SDR3B_ARATH RecName: Full=Short-chain dehydrogenase reductase 3b; Short=AtSDR3b; EC=1.1.1.-;	A0A835GTR5_9MAGN SubName: Full=Uncharacterized protein {ECO:0000313|EMBL:KAF9587405.1};	Reductases with broad range of substrate specificities	GO:0016491,oxidoreductase activity; GO:0003674,molecular_function; GO:0003824,catalytic activity	PF13561.9:Enoyl-(Acyl carrier protein) reductase
IFM89_002260	K17471 sulfate transporter 3 | (RefSeq) sulfate transporter 3.1-like (A)	--	hypothetical protein IFM89_002260 [Coptis chinensis]	SUT31_ARATH RecName: Full=Sulfate transporter 3.1; AltName: Full=AST12; AltName: Full=AtST1;	A0A835M490_9MAGN RecName: Full=STAS domain-containing protein {ECO:0000259|PROSITE:PS50801};	Sulfate/bicarbonate/oxalate exchanger SAT-1 and related transporters (SLC26 family)	GO:0009507,chloroplast; GO:0005887,integral component of plasma membrane; GO:0015301,NA; GO:0008271,secondary active sulfate transmembrane transporter activity; GO:0015116,sulfate transmembrane transporter activity; GO:0015293,symporter activity; GO:0008272,sulfate transport; GO:0003674,molecular_function; GO:0005215,transporter activity; GO:0008509,anion transmembrane transporter activity; GO:00…	PF00916.23:Sulfate permease family
IFM89_031724	K00800 3-phosphoshikimate 1-carboxyvinyltransferase [EC:2.5.1.19] | (RefSeq) 3-phosphoshikimate 1-carboxyvinyltransferase 2 (A)	ko00400: Phenylalanine, tyrosine and tryptophan biosynthesis; ko01100: Metabolic pathways; ko01110: Biosynthesis of secondary metabolites; ko01230: Biosynthesis of amino acids	hypothetical protein IFM89_031724 [Coptis chinensis]	AROA_PETHY RecName: Full=3-phosphoshikimate 1-carboxyvinyltransferase, chloroplastic {ECO:0000303|PubMed:3346248}; EC=2.5.1.19 {ECO:0000269|PubMed:1939260}; AltName: Full=5-enolpyruvylshikimate-3-phosphate synthase {ECO:0000303|PubMed:3346248}; Short=EPSP synthase {ECO:0000303|PubMed:3346248}; Flags: Precursor;	A0A835IHU5_9MAGN RecName: Full=3-phosphoshikimate 1-carboxyvinyltransferase {ECO:0000256|ARBA:ARBA00012450, ECO:0000256|RuleBase:RU004164}; EC=2.5.1.19 {ECO:0000256|ARBA:ARBA00012450, ECO:0000256|RuleBase:RU004164};	Pentafunctional AROM protein	GO:0009507,chloroplast; GO:0003866,3-phosphoshikimate 1-carboxyvinyltransferase activity; GO:0009073,aromatic amino acid family biosynthetic process; GO:0008652,cellular amino acid biosynthetic process; GO:0009423,chorismate biosynthetic process; GO:0007623,circadian rhythm; GO:0010597,green leaf volatile biosynthetic process; GO:0009635,response to herbicide; GO:0003674,molecular_function; GO:00…	PF00275.23:EPSP synthase (3-phosphoshikimate 1-carboxyvinyltransferase)
IFM89_023766	K15255 ATP-dependent DNA helicase PIF1 [EC:5.6.2.3] | (RefSeq) ATP-dependent DNA helicase PIF1-like (A)	--	hypothetical protein IFM89_023766 [Coptis chinensis]	--	A0A835LBM2_9MAGN SubName: Full=Uncharacterized protein {ECO:0000313|EMBL:KAF9589448.1};	--	--	--
IFM89_024239	K10526 OPC-8:0 CoA ligase 1 [EC:6.2.1.-] | (RefSeq) probable CoA ligase CCL5 (A)	ko00592: alpha-Linolenic acid metabolism; ko01100: Metabolic pathways; ko01110: Biosynthesis of secondary metabolites	hypothetical protein IFM89_024239 [Coptis chinensis]	CCL5_HUMLU RecName: Full=Probable CoA ligase CCL5 {ECO:0000305|PubMed:23300257}; Short=HlCCL5 {ECO:0000303|PubMed:23300257}; EC=6.2.1.- {ECO:0000305|PubMed:23300257};	A0A835HJK8_9MAGN SubName: Full=Uncharacterized protein {ECO:0000313|EMBL:KAF9601925.1};	Acyl-CoA synthetase	GO:0005829,cytosol; GO:0005524,ATP binding; GO:0016405,CoA-ligase activity; GO:0000166,nucleotide binding; GO:0003674,molecular_function; GO:0005488,binding; GO:0017076,purine nucleotide binding; GO:0030554,adenyl nucleotide binding; GO:0032553,ribonucleotide binding; GO:0032555,purine ribonucleotide binding; GO:0032559,adenyl ribonucleotide binding; GO:0035639,purine ribonucleoside triphosphate …	PF00501.31:AMP-binding enzyme
IFM89_006425	K13192 RNA-binding protein 26 | (RefSeq) zinc finger CCCH domain-containing protein 27 (A)	--	hypothetical protein IFM89_006425 [Coptis chinensis]	C3H27_ORYSJ RecName: Full=Zinc finger CCCH domain-containing protein 27; Short=OsC3H27;	A0A835HTA5_9MAGN SubName: Full=Uncharacterized protein {ECO:0000313|EMBL:KAF9604416.1};	Proteins containing the RNA recognition motif	GO:0005634,nucleus; GO:0003677,DNA binding; GO:0046872,metal ion binding; GO:0003729,mRNA binding; GO:0003723,RNA binding; GO:0003674,molecular_function; GO:0003676,nucleic acid binding; GO:0005488,binding; GO:0097159,organic cyclic compound binding; GO:1901363,heterocyclic compound binding; GO:0043167,ion binding; GO:0043169,cation binding; GO:0005575,cellular_component; GO:0005622,intracellular…	PF00076.25:RNA recognition motif. (a.k.a. RRM, RBD, or RNP domain)
IFM89_020842	K16055 trehalose 6-phosphate synthase/phosphatase [EC:2.4.1.15 3.1.3.12] | (RefSeq) alpha,alpha-trehalose-phosphate synthase [UDP-forming] 6-like (A)	ko00500: Starch and sucrose metabolism; ko01100: Metabolic pathways; ko01110: Biosynthesis of secondary metabolites	hypothetical protein IFM89_020842 [Coptis chinensis]	TPS6_ARATH RecName: Full=Alpha,alpha-trehalose-phosphate synthase [UDP-forming] 6 {ECO:0000303|PubMed:16771775}; EC=2.4.1.15 {ECO:0000269|PubMed:17981987}; AltName: Full=Trehalose-6-phosphate synthase 6 {ECO:0000303|PubMed:16771775}; Short=AtTPS6 {ECO:0000303|PubMed:16771775};	A0A835MIS3_9MAGN SubName: Full=Uncharacterized protein {ECO:0000313|EMBL:KAF9625256.1};	Trehalose-6-phosphate synthase component TPS1 and related subunits	GO:0003825,alpha,alpha-trehalose-phosphate synthase (UDP-forming) activity; GO:0004805,trehalose-phosphatase activity; GO:0005992,trehalose biosynthetic process; GO:0070413,trehalose metabolism in response to stress; GO:0003674,molecular_function; GO:0003824,catalytic activity; GO:0008194,UDP-glycosyltransferase activity; GO:0016740,transferase activity; GO:0016757,glycosyltransferase activity; G…	PF00982.24:Glycosyltransferase family 20
IFM89_007513	K17255 Rab GDP dissociation inhibitor | (RefSeq) guanosine nucleotide diphosphate dissociation inhibitor At5g09550 (A)	--	hypothetical protein IFM89_007513 [Coptis chinensis]	GDI2_ARATH RecName: Full=Guanosine nucleotide diphosphate dissociation inhibitor 2; Short=AtGDI2;	A0A835I1S7_9MAGN SubName: Full=Uncharacterized protein {ECO:0000313|EMBL:KAF9608127.1};	RAB proteins geranylgeranyltransferase component A (RAB escort protein)	GO:0048046,apoplast; GO:0005737,cytoplasm; GO:0005829,cytosol; GO:0009506,plasmodesma; GO:0005096,GTPase activator activity; GO:0005093,Rab GDP-dissociation inhibitor activity; GO:0015031,protein transport; GO:0007264,small GTPase mediated signal transduction; GO:0016192,vesicle-mediated transport; GO:0003674,molecular_function; GO:0008047,enzyme activator activity; GO:0030234,enzyme regulator ac…	--
IFM89_027593	K02638 plastocyanin | (RefSeq) plastocyanin (A)	ko00195: Photosynthesis; ko01100: Metabolic pathways	hypothetical protein IFM89_027593 [Coptis chinensis]	PLAS1_POPNI RecName: Full=Plastocyanin A, chloroplastic; Short=PCa; Flags: Precursor;	A0A835IQL7_9MAGN RecName: Full=Plastocyanin {ECO:0000256|RuleBase:RU363020};	--	GO:0009535,chloroplast thylakoid membrane; GO:0005507,copper ion binding; GO:0009055,electron transfer activity; GO:0003674,molecular_function; GO:0005488,binding; GO:0043167,ion binding; GO:0043169,cation binding; GO:0046872,metal ion binding; GO:0046914,transition metal ion binding; GO:0003824,catalytic activity; GO:0016491,oxidoreductase activity; GO:0005575,cellular_component; GO:0005622,intr…	PF00127.23:Copper binding proteins, plastocyanin/azurin family
IFM89_032689	K10144 RING finger and CHY zinc finger domain-containing protein 1 [EC:2.3.2.27] | (RefSeq) probable E3 ubiquitin-protein ligase RZFP34 (A)	ko04120: Ubiquitin mediated proteolysis	hypothetical protein IFM89_032689 [Coptis chinensis]	ZFP34_ORYSJ RecName: Full=Probable E3 ubiquitin-protein ligase RZFP34 {ECO:0000305}; EC=2.3.2.27 {ECO:0000305}; AltName: Full=OsRFP1 {ECO:0000303|Ref.1}; AltName: Full=RING zinc-finger protein 34 {ECO:0000303|PubMed:25002225}; Short=OsRZFP34 {ECO:0000303|PubMed:25002225};	A0A835M7R6_9MAGN SubName: Full=Uncharacterized protein {ECO:0000313|EMBL:KAF9616839.1};	Zn-finger protein	GO:0005634,nucleus; GO:0061630,ubiquitin protein ligase activity; GO:0008270,zinc ion binding; GO:0016567,protein ubiquitination; GO:0006511,ubiquitin-dependent protein catabolic process; GO:0003674,molecular_function; GO:0003824,catalytic activity; GO:0004842,ubiquitin-protein transferase activity; GO:0016740,transferase activity; GO:0019787,ubiquitin-like protein transferase activity; GO:006165…	PF14599.9:Zinc-ribbon
IFM89_038224	K12309 beta-galactosidase [EC:3.2.1.23] | (Kazusa) Lj3g3v0323160.1; - (A)	ko00052: Galactose metabolism; ko00511: Other glycan degradation; ko00531: Glycosaminoglycan degradation; ko00600: Sphingolipid metabolism; ko00604: Glycosphingolipid biosynthesis - ganglio series; ko01100: Metabolic pathways	hypothetical protein IFM89_038224 [Coptis chinensis]	IDD7_ARATH RecName: Full=Protein indeterminate-domain 7 {ECO:0000303|PubMed:16784536};	A0A835M8J4_9MAGN RecName: Full=C2H2-type domain-containing protein {ECO:0000259|PROSITE:PS50157};	FOG: Zn-finger	GO:0005634,nucleus; GO:0003677,DNA binding; GO:0003700,DNA-binding transcription factor activity; GO:0046872,metal ion binding; GO:0006355,regulation of DNA-templated transcription; GO:0003674,molecular_function; GO:0003676,nucleic acid binding; GO:0005488,binding; GO:0097159,organic cyclic compound binding; GO:1901363,heterocyclic compound binding; GO:0140110,transcription regulator activity; GO…	PF00096.29:Zinc finger, C2H2 type
IFM89_016084	K00422 polyphenol oxidase [EC:1.10.3.1] | (RefSeq) polyphenol oxidase I, chloroplastic-like (A)	ko00350: Tyrosine metabolism; ko00950: Isoquinoline alkaloid biosynthesis; ko01100: Metabolic pathways; ko01110: Biosynthesis of secondary metabolites	hypothetical protein IFM89_016084 [Coptis chinensis]	AS1_ANTMA RecName: Full=Aureusidin synthase; Short=AmAS1; EC=1.21.3.6 {ECO:0000269|PubMed:11073455, ECO:0000269|PubMed:11418122};	A0A835INJ6_9MAGN SubName: Full=Uncharacterized protein {ECO:0000313|EMBL:KAF9621060.1};	--	GO:0005775,vacuolar lumen; GO:0033793,aureusidin synthase activity; GO:0102706,butein:oxygen oxidoreductase activity; GO:0004097,catechol oxidase activity; GO:0005507,copper ion binding; GO:0102791,sulfuretin synthase activity; GO:0046148,pigment biosynthetic process; GO:0003674,molecular_function; GO:0003824,catalytic activity; GO:0016491,oxidoreductase activity; GO:0046992,oxidoreductase activi…	PF12143.11:Protein of unknown function (DUF_B2219)
IFM89_025233	K08914 light-harvesting complex II chlorophyll a/b binding protein 3 | (RefSeq) chlorophyll a-b binding protein 13, chloroplastic-like (A)	ko00196: Photosynthesis - antenna proteins; ko01100: Metabolic pathways	hypothetical protein IFM89_025233 [Coptis chinensis]	CB23_SOLLC RecName: Full=Chlorophyll a-b binding protein 13, chloroplastic; AltName: Full=LHCII type III CAB-13; Flags: Precursor;	A0A835GZP8_9MAGN RecName: Full=Chlorophyll a-b binding protein, chloroplastic {ECO:0000256|RuleBase:RU363080};	--	GO:0009535,chloroplast thylakoid membrane; GO:0016021,integral component of membrane; GO:0009522,photosystem I; GO:0009523,photosystem II; GO:0016168,chlorophyll binding; GO:0046872,metal ion binding; GO:0009768,photosynthesis, light harvesting in photosystem I; GO:0009416,response to light stimulus; GO:0003674,molecular_function; GO:0005488,binding; GO:0046906,tetrapyrrole binding; GO:0097159,or…	PF00504.24:Chlorophyll A-B binding protein
IFM89_005157	--	--	hypothetical protein IFM89_005157 [Coptis chinensis]	--	A0A835IM78_9MAGN SubName: Full=Uncharacterized protein {ECO:0000313|EMBL:KAF9619143.1};	--	GO:0003677,DNA binding; GO:0008270,zinc ion binding; GO:0003674,molecular_function; GO:0003676,nucleic acid binding; GO:0005488,binding; GO:0097159,organic cyclic compound binding; GO:1901363,heterocyclic compound binding; GO:0043167,ion binding; GO:0043169,cation binding; GO:0046872,metal ion binding; GO:0046914,transition metal ion binding	PF03126.21:Plus-3 domain
IFM89_037843	K01051 pectinesterase [EC:3.1.1.11] | (RefSeq) probable pectinesterase/pectinesterase inhibitor 58 (A)	ko00040: Pentose and glucuronate interconversions; ko01100: Metabolic pathways	hypothetical protein IFM89_037843 [Coptis chinensis]	GTL1_ARATH RecName: Full=Trihelix transcription factor GTL1 {ECO:0000303|PubMed:19717615}; AltName: Full=GT2-LIKE protein 1 {ECO:0000303|PubMed:9501260}; Short=AtGTL1 {ECO:0000303|PubMed:9501260}; Short=Protein GT-2-LIKE1 {ECO:0000303|PubMed:19717615}; AltName: Full=Trihelix DNA-binding protein GTL1 {ECO:0000305};	A0A835LSZ8_9MAGN RecName: Full=Myb-like domain-containing protein {ECO:0000259|PROSITE:PS50090};	Transcription factor GT-2 and related proteins, contains trihelix DNA-binding/SANT domain	GO:0005634,nucleus; GO:0003677,DNA binding; GO:0003700,DNA-binding transcription factor activity; GO:0043565,sequence-specific DNA binding; GO:0042631,cellular response to water deprivation; GO:0030308,negative regulation of cell growth; GO:0032876,negative regulation of DNA endoreduplication; GO:0045892,negative regulation of DNA-templated transcription; GO:0008361,regulation of cell size; GO:20…	PF13837.9:Myb/SANT-like DNA-binding domain
IFM89_026273	K03860 phosphatidylinositol N-acetylglucosaminyltransferase subunit Q | (RefSeq) N-acetylglucosaminyl-phosphatidylinositol biosynthetic protein gpi1-like (A)	ko00563: Glycosylphosphatidylinositol (GPI)-anchor biosynthesis; ko01100: Metabolic pathways	hypothetical protein IFM89_026273 [Coptis chinensis]	SNAK2_SOLTU RecName: Full=Snakin-2; Flags: Precursor;	A0A835J234_9MAGN SubName: Full=Uncharacterized protein {ECO:0000313|EMBL:KAF9625693.1};	--	GO:0005576,extracellular region; GO:0006952,defense response; GO:0006950,response to stress; GO:0008150,biological_process; GO:0050896,response to stimulus; GO:0005575,cellular_component; GO:0110165,cellular anatomical entity	PF02704.17:Gibberellin regulated protein
IFM89_002181	K08790 serine/threonine kinase 38 [EC:2.7.11.1] | (RefSeq) serine/threonine-protein kinase 38-like (A)	--	hypothetical protein IFM89_002181 [Coptis chinensis]	IRE_ARATH RecName: Full=Probable serine/threonine protein kinase IRE {ECO:0000305}; EC=2.7.11.1 {ECO:0000305}; AltName: Full=Protein INCOMPLETE ROOT HAIR ELONGATION {ECO:0000303|PubMed:12000677}; Short=AtIRE {ECO:0000303|PubMed:17237187};	A0A835I6P6_9MAGN SubName: Full=Uncharacterized protein {ECO:0000313|EMBL:KAF9612585.1};	NDR and related serine/threonine kinases	GO:0005524,ATP binding; GO:0016301,kinase activity; GO:0046872,metal ion binding; GO:0106310,protein serine kinase activity; GO:0004674,protein serine/threonine kinase activity; GO:0035556,intracellular signal transduction; GO:0018105,peptidyl-serine phosphorylation; GO:0040008,regulation of growth; GO:0009826,unidimensional cell growth; GO:0000166,nucleotide binding; GO:0003674,molecular_functio…	PF00069.28:Protein kinase domain
IFM89_035122	K18819 inositol 3-alpha-galactosyltransferase [EC:2.4.1.123] | (RefSeq) galactinol synthase 1 (A)	ko00052: Galactose metabolism; ko01100: Metabolic pathways	hypothetical protein IFM89_035122 [Coptis chinensis]	GOLS1_AJURE RecName: Full=Galactinol synthase 1; Short=ArGolS1; Short=GolS-1; EC=2.4.1.123;	A0A835IT38_9MAGN RecName: Full=Hexosyltransferase {ECO:0000256|RuleBase:RU362027}; EC=2.4.1.- {ECO:0000256|RuleBase:RU362027};	Glycosyl transferase, family 8 - glycogenin	GO:0005737,cytoplasm; GO:0047216,inositol 3-alpha-galactosyltransferase activity; GO:0046872,metal ion binding; GO:0052576,carbohydrate storage; GO:0070417,cellular response to cold; GO:0006012,galactose metabolic process; GO:0010325,raffinose family oligosaccharide biosynthetic process; GO:0003674,molecular_function; GO:0003824,catalytic activity; GO:0008194,UDP-glycosyltransferase activity; GO:…	PF01501.23:Glycosyl transferase family 8
IFM89_029119	K17500 integrin-linked kinase-associated serine/threonine phosphatase 2C [EC:3.1.3.16] | (RefSeq) WAT1-related protein At3g18200-like (A)	--	hypothetical protein IFM89_029119 [Coptis chinensis]	WAT1_ARATH RecName: Full=Protein WALLS ARE THIN 1;	A0A835IT44_9MAGN RecName: Full=WAT1-related protein {ECO:0000256|RuleBase:RU363077};	--	GO:0016021,integral component of membrane; GO:0000325,plant-type vacuole; GO:0009705,plant-type vacuole membrane; GO:0005886,plasma membrane; GO:0022857,transmembrane transporter activity; GO:0009851,auxin biosynthetic process; GO:0010315,auxin export across the plasma membrane; GO:0009734,auxin-activated signaling pathway; GO:0071555,cell wall organization; GO:0006952,defense response; GO:000983…	PF00892.23:EamA-like transporter family
IFM89_006661	K13386 3'-hydroxy-N-methyl-(S)-coclaurine 4'-O-methyltransferase [EC:2.1.1.116] | (RefSeq) 3'-hydroxy-N-methyl-(S)-coclaurine 4'-O-methyltransferase 2 (A)	ko00950: Isoquinoline alkaloid biosynthesis; ko01100: Metabolic pathways; ko01110: Biosynthesis of secondary metabolites	hypothetical protein IFM89_006661 [Coptis chinensis]	4OMT_COPJA RecName: Full=3'-hydroxy-N-methyl-(S)-coclaurine 4'-O-methyltransferase; EC=2.1.1.116; AltName: Full=S-adenosyl-L-methionine:3'-hydroxy-N-methylcoclaurine 4'-O-methyltransferase; Short=4'-OMT;	A0A835MEB4_9MAGN SubName: Full=Uncharacterized protein {ECO:0000313|EMBL:KAF9623934.1};	Hydroxyindole-O-methyltransferase and related SAM-dependent methyltransferases	GO:0030784,3'-hydroxy-N-methyl-(S)-coclaurine 4'-O-methyltransferase activity; GO:0008171,O-methyltransferase activity; GO:0046983,protein dimerization activity; GO:0032259,methylation; GO:0003674,molecular_function; GO:0003824,catalytic activity; GO:0008168,methyltransferase activity; GO:0008757,S-adenosylmethionine-dependent methyltransferase activity; GO:0016740,transferase activity; GO:001674…	PF00891.21:O-methyltransferase domain
IFM89_036288	K17500 integrin-linked kinase-associated serine/threonine phosphatase 2C [EC:3.1.3.16] | (RefSeq) WAT1-related protein At3g18200-like (A)	--	hypothetical protein IFM89_036288 [Coptis chinensis]	WTR35_ARATH RecName: Full=WAT1-related protein At4g19185;	A0A835IJ28_9MAGN RecName: Full=WAT1-related protein {ECO:0000256|RuleBase:RU363077};	--	GO:0005794,Golgi apparatus; GO:0016021,integral component of membrane; GO:0005886,plasma membrane; GO:0022857,transmembrane transporter activity; GO:0003674,molecular_function; GO:0005215,transporter activity; GO:0005575,cellular_component; GO:0005622,intracellular anatomical structure; GO:0005737,cytoplasm; GO:0012505,endomembrane system; GO:0043226,organelle; GO:0043227,membrane-bounded organel…	PF00892.23:EamA-like transporter family
IFM89_034484	K15227 arogenate dehydrogenase (NADP+), plant [EC:1.3.1.78] | (RefSeq) arogenate dehydrogenase 1, chloroplastic (A)	ko00400: Phenylalanine, tyrosine and tryptophan biosynthesis; ko01100: Metabolic pathways; ko01110: Biosynthesis of secondary metabolites; ko01230: Biosynthesis of amino acids	hypothetical protein IFM89_034484 [Coptis chinensis]	TYRA1_ARATH RecName: Full=Arogenate dehydrogenase 1, chloroplastic; EC=1.3.1.78; AltName: Full=TYRATC; AltName: Full=TyrAAT1; Flags: Precursor;	A0A835LK97_9MAGN RecName: Full=Prephenate/arogenate dehydrogenase domain-containing protein {ECO:0000259|PROSITE:PS51176};	Prephenate dehydrogenase (NADP+)	GO:0009507,chloroplast; GO:0033730,arogenate dehydrogenase (NADP+) activity; GO:0008977,prephenate dehydrogenase (NAD+) activity; GO:0004665,prephenate dehydrogenase (NADP+) activity; GO:0006571,tyrosine biosynthetic process; GO:0003674,molecular_function; GO:0003824,catalytic activity; GO:0016491,oxidoreductase activity; GO:0016627,oxidoreductase activity, acting on the CH-CH group of donors; GO…	PF02153.20:Prephenate dehydrogenase, nucleotide-binding domain
IFM89_033096	K08711 ATP-binding cassette, subfamily G (WHITE), member 2, PDR | (RefSeq) LOW QUALITY PROTEIN: ZEB2-regulated ABC transporter 1-like (A)	ko02010: ABC transporters	hypothetical protein IFM89_033096 [Coptis chinensis]	AB39G_ORYSJ RecName: Full=ABC transporter G family member 39 {ECO:0000303|PubMed:18299247}; Short=OsABCG39 {ECO:0000303|PubMed:18299247}; AltName: Full=Pleiotropic drug resistance protein 7 {ECO:0000303|PubMed:12644668, ECO:0000303|PubMed:16506311}; Short=OsPDR7 {ECO:0000303|PubMed:16506311};	A0A835IFU2_9MAGN SubName: Full=Uncharacterized protein {ECO:0000313|EMBL:KAF9617026.1};	Pleiotropic drug resistance proteins (PDR1-15), ABC superfamily	GO:0016021,integral component of membrane; GO:0140359,ABC-type transporter activity; GO:0005524,ATP binding; GO:0003674,molecular_function; GO:0005215,transporter activity; GO:0015399,primary active transmembrane transporter activity; GO:0022804,active transmembrane transporter activity; GO:0022857,transmembrane transporter activity; GO:0042626,ATPase-coupled transmembrane transporter activity; G…	PF01061.27:ABC-2 type transporter
IFM89_009445	K06130 lysophospholipase II [EC:3.1.1.5] | (RefSeq) acyl-protein thioesterase 2-like (A)	ko00564: Glycerophospholipid metabolism	hypothetical protein IFM89_009445 [Coptis chinensis]	--	A0A835IAI7_9MAGN RecName: Full=Abhydrolase_2 domain-containing protein {ECO:0000259|Pfam:PF02230};	Lysophospholipase	GO:0016787,hydrolase activity; GO:0003674,molecular_function; GO:0003824,catalytic activity	PF02230.19:Phospholipase/Carboxylesterase
IFM89_015207	K17795 mitochondrial import inner membrane translocase subunit TIM17 | (RefSeq) mitochondrial import inner membrane translocase subunit TIM17-2-like (A)	--	hypothetical protein IFM89_015207 [Coptis chinensis]	TI172_ARATH RecName: Full=Mitochondrial import inner membrane translocase subunit TIM17-2;	A0A835H8M4_9MAGN SubName: Full=Uncharacterized protein {ECO:0000313|EMBL:KAF9592513.1};	Mitochondrial import inner membrane translocase, subunit TIM17	GO:0005783,endoplasmic reticulum; GO:0031305,integral component of mitochondrial inner membrane; GO:0005743,mitochondrial inner membrane; GO:0005741,mitochondrial outer membrane; GO:0005739,mitochondrion; GO:0005744,TIM23 mitochondrial import inner membrane translocase complex; GO:0030150,protein import into mitochondrial matrix; GO:0045039,protein insertion into mitochondrial inner membrane; GO:…	PF02466.22:Tim17/Tim22/Tim23/Pmp24 family
IFM89_020028	K14685 solute carrier family 40 (iron-regulated transporter), member 1 | (RefSeq) solute carrier family 40 member 2-like isoform X1 (A)	--	hypothetical protein IFM89_020028 [Coptis chinensis]	SH3P3_ARATH RecName: Full=SH3 domain-containing protein 3 {ECO:0000303|PubMed:11701884}; Short=AtSH3P3 {ECO:0000303|PubMed:11701884};	A0A835MBX6_9MAGN RecName: Full=SH3 domain-containing protein {ECO:0000259|PROSITE:PS50002};	--	GO:0030136,clathrin-coated vesicle; GO:0005829,cytosol; GO:0005575,cellular_component; GO:0005622,intracellular anatomical structure; GO:0005737,cytoplasm; GO:0030135,coated vesicle; GO:0031410,cytoplasmic vesicle; GO:0031982,vesicle; GO:0043226,organelle; GO:0043227,membrane-bounded organelle; GO:0043229,intracellular organelle; GO:0043231,intracellular membrane-bounded organelle; GO:0097708,int…	PF14604.9:Variant SH3 domain
IFM89_024357	K05681 ATP-binding cassette, subfamily G (WHITE), member 2 | (RefSeq) ABC transporter, ATP-binding protein isoform 1 (A)	ko02010: ABC transporters	hypothetical protein IFM89_024357 [Coptis chinensis]	AB7G_ARATH RecName: Full=ABC transporter G family member 7; Short=ABC transporter ABCG.7; Short=AtABCG7; AltName: Full=White-brown complex homolog protein 7; Short=AtWBC7;	A0A835MFV3_9MAGN RecName: Full=ABC transporter domain-containing protein {ECO:0000259|PROSITE:PS50893};	Transporter, ABC superfamily (Breast cancer resistance protein)	GO:0009507,chloroplast; GO:0009941,chloroplast envelope; GO:0016021,integral component of membrane; GO:0005739,mitochondrion; GO:0140359,ABC-type transporter activity; GO:0005524,ATP binding; GO:0003674,molecular_function; GO:0005215,transporter activity; GO:0015399,primary active transmembrane transporter activity; GO:0022804,active transmembrane transporter activity; GO:0022857,transmembrane tr…	PF01061.27:ABC-2 type transporter
IFM89_012587	K15030 translation initiation factor 3 subunit M | (RefSeq) eukaryotic translation initiation factor 3 subunit M-like (A)	--	hypothetical protein IFM89_012587 [Coptis chinensis]	MD26B_ARATH RecName: Full=Probable mediator of RNA polymerase II transcription subunit 26b;	A0A835H5U8_9MAGN RecName: Full=TFIIS N-terminal domain-containing protein {ECO:0000259|PROSITE:PS51319};	--	GO:0005634,nucleus; GO:0003746,translation elongation factor activity; GO:0003674,molecular_function; GO:0003676,nucleic acid binding; GO:0005488,binding; GO:0008135,translation factor activity, RNA binding; GO:0045182,translation regulator activity; GO:0090079,translation regulator activity, nucleic acid binding; GO:0097159,organic cyclic compound binding; GO:1901363,heterocyclic compound bindin…	PF08711.14:TFIIS helical bundle-like domain
IFM89_013313	K07375 tubulin beta | (RefSeq) tubulin beta-2 chain (A)	ko04145: Phagosome	hypothetical protein IFM89_013313 [Coptis chinensis]	TBB4_ORYSJ RecName: Full=Tubulin beta-4 chain; AltName: Full=Beta-4-tubulin;	A0A835HCJ2_9MAGN RecName: Full=Tubulin beta chain {ECO:0000256|RuleBase:RU000352};	Beta tubulin	GO:0005737,cytoplasm; GO:0005874,microtubule; GO:0005525,GTP binding; GO:0005200,structural constituent of cytoskeleton; GO:0000226,microtubule cytoskeleton organization; GO:0007017,microtubule-based process; GO:0000278,mitotic cell cycle; GO:0000166,nucleotide binding; GO:0003674,molecular_function; GO:0005488,binding; GO:0017076,purine nucleotide binding; GO:0019001,guanyl nucleotide binding; G…	PF00091.28:Tubulin/FtsZ family, GTPase domain
IFM89_008086	K01188 beta-glucosidase [EC:3.2.1.21] | (RefSeq) beta-glucosidase 40 (A)	ko00460: Cyanoamino acid metabolism; ko00500: Starch and sucrose metabolism; ko00999: Biosynthesis of various plant secondary metabolites; ko01100: Metabolic pathways; ko01110: Biosynthesis of secondary metabolites	hypothetical protein IFM89_008086 [Coptis chinensis]	BGL40_ARATH RecName: Full=Beta-glucosidase 40; Short=AtBGLU40; EC=3.2.1.21; Flags: Precursor;	A0A835IZ04_9MAGN SubName: Full=Uncharacterized protein {ECO:0000313|EMBL:KAF9624148.1};	Beta-glucosidase, lactase phlorizinhydrolase, and related proteins	GO:0048046,apoplast; GO:0008422,beta-glucosidase activity; GO:0102483,scopolin beta-glucosidase activity; GO:0005975,carbohydrate metabolic process; GO:0003674,molecular_function; GO:0003824,catalytic activity; GO:0004553,hydrolase activity, hydrolyzing O-glycosyl compounds; GO:0015926,glucosidase activity; GO:0016787,hydrolase activity; GO:0016798,hydrolase activity, acting on glycosyl bonds; GO…	PF00232.21:Glycosyl hydrolase family 1
novel.8162	--	--	hypothetical protein AQUCO_01400852v1 [Aquilegia coerulea]	WTR24_ARATH RecName: Full=WAT1-related protein At3g30340;	A0A2G5DYG8_AQUCA RecName: Full=WAT1-related protein {ECO:0000256|RuleBase:RU363077};	--	GO:0016021,integral component of membrane; GO:0005886,plasma membrane; GO:0022857,transmembrane transporter activity; GO:0003674,molecular_function; GO:0005215,transporter activity; GO:0005575,cellular_component; GO:0016020,membrane; GO:0031224,intrinsic component of membrane; GO:0110165,cellular anatomical entity; GO:0071944,cell periphery	PF00892.23:EamA-like transporter family
IFM89_001583	K02634 apocytochrome f | (RefSeq) chaperone protein DnaJ (A)	ko00195: Photosynthesis; ko01100: Metabolic pathways	hypothetical protein IFM89_001583 [Coptis chinensis]	DNJ20_ARATH RecName: Full=Chaperone protein dnaJ 20, chloroplastic; Short=AtDjC20; Short=AtJ20; Flags: Precursor;	A0A835HVQ5_9MAGN RecName: Full=J domain-containing protein {ECO:0000259|PROSITE:PS50076};	Molecular chaperone (DnaJ superfamily)	GO:0009507,chloroplast; GO:0005634,nucleus; GO:0061077,chaperone-mediated protein folding; GO:1902395,regulation of 1-deoxy-D-xylulose-5-phosphate synthase activity; GO:0010322,regulation of isopentenyl diphosphate biosynthetic process, methylerythritol 4-phosphate pathway; GO:0006457,protein folding; GO:0008150,biological_process; GO:0009987,cellular process; GO:0050790,regulation of catalytic a…	PF00226.34:DnaJ domain
IFM89_011302	--	--	hypothetical protein IFM89_011302 [Coptis chinensis]	--	A0A835HS99_9MAGN RecName: Full=CENP-V/GFA domain-containing protein {ECO:0000259|PROSITE:PS51891};	Uncharacterized conserved protein	GO:0016846,carbon-sulfur lyase activity; GO:0046872,metal ion binding; GO:0003674,molecular_function; GO:0003824,catalytic activity; GO:0016829,lyase activity; GO:0005488,binding; GO:0043167,ion binding; GO:0043169,cation binding	PF04828.17:Glutathione-dependent formaldehyde-activating enzyme
IFM89_013275	K01580 glutamate decarboxylase [EC:4.1.1.15] | (RefSeq) glutamate decarboxylase 1 (A)	ko00250: Alanine, aspartate and glutamate metabolism; ko00410: beta-Alanine metabolism; ko00430: Taurine and hypotaurine metabolism; ko00650: Butanoate metabolism; ko01100: Metabolic pathways; ko01110: Biosynthesis of secondary metabolites	hypothetical protein IFM89_013275 [Coptis chinensis]	DCE1_ARATH RecName: Full=Glutamate decarboxylase 1; Short=GAD 1 {ECO:0000303|PubMed:9700069}; EC=4.1.1.15 {ECO:0000305|PubMed:9700069};	A0A835IYT1_9MAGN RecName: Full=Glutamate decarboxylase {ECO:0000256|ARBA:ARBA00012421, ECO:0000256|RuleBase:RU361171}; EC=4.1.1.15 {ECO:0000256|ARBA:ARBA00012421, ECO:0000256|RuleBase:RU361171};	Glutamate decarboxylase/sphingosine phosphate lyase	GO:0005829,cytosol; GO:0005516,calmodulin binding; GO:0004351,glutamate decarboxylase activity; GO:0030170,pyridoxal phosphate binding; GO:0006538,glutamate catabolic process; GO:0003674,molecular_function; GO:0005488,binding; GO:0005515,protein binding; GO:0003824,catalytic activity; GO:0016829,lyase activity; GO:0016830,carbon-carbon lyase activity; GO:0016831,carboxy-lyase activity; GO:0019842…	PF00282.22:Pyridoxal-dependent decarboxylase conserved domain
novel.2436	K02933 large subunit ribosomal protein L6 | (RefSeq) 50S ribosomal protein L6, chloroplastic (A)	ko03010: Ribosome	hypothetical protein IFM89_039848 [Coptis chinensis]	RK6_ARATH RecName: Full=50S ribosomal protein L6, chloroplastic; AltName: Full=Protein EMBRYO DEFECTIVE 2394; Flags: Precursor;	A0A835LGZ0_9MAGN SubName: Full=Uncharacterized protein {ECO:0000313|EMBL:KAF9586976.1};	Mitochondrial/chloroplast ribosomal protein L6	GO:0009507,chloroplast; GO:0009941,chloroplast envelope; GO:0009570,chloroplast stroma; GO:0005576,extracellular region; GO:0005840,ribosome; GO:0003729,mRNA binding; GO:0019843,rRNA binding; GO:0003735,structural constituent of ribosome; GO:0009793,embryo development ending in seed dormancy; GO:0006412,translation; GO:0003674,molecular_function; GO:0003676,nucleic acid binding; GO:0003723,RNA bi…	--
novel.988	--	--	--	--	--	--	--	--
IFM89_009669	K08066 nuclear transcription factor Y, gamma | (RefSeq) nuclear transcription factor Y subunit C-9 (A)	--	hypothetical protein IFM89_009669 [Coptis chinensis]	NFYC3_ARATH RecName: Full=Nuclear transcription factor Y subunit C-3; Short=AtNF-YC-3;	A0A835INP1_9MAGN RecName: Full=CBFD_NFYB_HMF domain-containing protein {ECO:0000259|Pfam:PF00808};	CCAAT-binding factor, subunit C (HAP5)	GO:0005634,nucleus; GO:0001228,DNA-binding transcription activator activity, RNA polymerase II-specific; GO:0003700,DNA-binding transcription factor activity; GO:0046982,protein heterodimerization activity; GO:0000976,transcription cis-regulatory region binding; GO:0003712,transcription coregulator activity; GO:0009738,abscisic acid-activated signaling pathway; GO:0009740,gibberellic acid mediate…	PF00808.26:Histone-like transcription factor (CBF/NF-Y) and archaeal histone
IFM89_006980	K00106 xanthine dehydrogenase/oxidase [EC:1.17.1.4 1.17.3.2] | (RefSeq) xanthine dehydrogenase 1-like isoform X1 (A)	ko00230: Purine metabolism; ko00232: Caffeine metabolism; ko01100: Metabolic pathways; ko01110: Biosynthesis of secondary metabolites; ko01232: Nucleotide metabolism; ko04146: Peroxisome	hypothetical protein IFM89_006980 [Coptis chinensis]	XDH1_ARATH RecName: Full=Xanthine dehydrogenase 1; Short=AtXDH1; EC=1.17.1.4 {ECO:0000269|PubMed:14726515};	A0A835HFS6_9MAGN RecName: Full=Ald_Xan_dh_C2 domain-containing protein {ECO:0000259|Pfam:PF02738};	Xanthine dehydrogenase	GO:0005886,plasma membrane; GO:0051537,2 iron, 2 sulfur cluster binding; GO:0071949,FAD binding; GO:0005506,iron ion binding; GO:0016491,oxidoreductase activity; GO:0004854,xanthine dehydrogenase activity; GO:0006145,purine nucleobase catabolic process; GO:0000302,response to reactive oxygen species; GO:0009414,response to water deprivation; GO:0042554,superoxide anion generation; GO:0046110,xant…	PF02738.21:Molybdopterin cofactor-binding domain
IFM89_026324	--	--	hypothetical protein IFM89_026324 [Coptis chinensis]	Y1686_ARATH RecName: Full=Uncharacterized membrane protein At1g16860;	A0A835LWM6_9MAGN SubName: Full=Uncharacterized protein {ECO:0000313|EMBL:KAF9611018.1};	--	GO:0016021,integral component of membrane; GO:0005886,plasma membrane; GO:2001007,negative regulation of cellulose biosynthetic process; GO:0000271,polysaccharide biosynthetic process; GO:0005975,carbohydrate metabolic process; GO:0005976,polysaccharide metabolic process; GO:0006073,cellular glucan metabolic process; GO:0006109,regulation of carbohydrate metabolic process; GO:0008150,biological_p…	PF01925.22:Sulfite exporter TauE/SafE
IFM89_032428	K18422 helicase MOV-10 [EC:3.6.4.13] | (RefSeq) probable RNA helicase SDE3 (A)	--	hypothetical protein IFM89_032428 [Coptis chinensis]	SDE3_ARATH RecName: Full=Probable RNA helicase SDE3; EC=3.6.4.13; AltName: Full=Silencing defective protein 3;	A0A835I8X3_9MAGN SubName: Full=Uncharacterized protein {ECO:0000313|EMBL:KAF9611458.1};	RNA helicase	GO:0005829,cytosol; GO:0043186,P granule; GO:0005524,ATP binding; GO:0016887,ATP hydrolysis activity; GO:0003723,RNA binding; GO:0003724,RNA helicase activity; GO:0035194,post-transcriptional gene silencing by RNA; GO:0009616,RNAi-mediated antiviral immune response; GO:0000166,nucleotide binding; GO:0003674,molecular_function; GO:0005488,binding; GO:0017076,purine nucleotide binding; GO:0030554,a…	PF13086.9:AAA domain
IFM89_027696	K20617 cytochrome P450 family 71 subfamily A | (RefSeq) cytochrome P450 71A9-like (A)	--	hypothetical protein IFM89_027696 [Coptis chinensis]	C7113_PRUMU RecName: Full=Cytochrome P450 71AP13 {ECO:0000303|PubMed:25015725}; EC=1.14.-.- {ECO:0000305};	A0A835LVL8_9MAGN SubName: Full=Uncharacterized protein {ECO:0000313|EMBL:KAF9606652.1};	Cytochrome P450 CYP2 subfamily	GO:0016021,integral component of membrane; GO:0020037,heme binding; GO:0005506,iron ion binding; GO:0004497,monooxygenase activity; GO:0016705,oxidoreductase activity, acting on paired donors, with incorporation or reduction of molecular oxygen; GO:0003674,molecular_function; GO:0005488,binding; GO:0046906,tetrapyrrole binding; GO:0097159,organic cyclic compound binding; GO:1901363,heterocyclic c…	PF00067.25:Cytochrome P450
IFM89_012148	K01051 pectinesterase [EC:3.1.1.11] | (RefSeq) pectinesterase (A)	ko00040: Pentose and glucuronate interconversions; ko01100: Metabolic pathways	hypothetical protein IFM89_012148 [Coptis chinensis]	PME1_SOLLC RecName: Full=Pectinesterase 1; Short=PE 1; EC=3.1.1.11; AltName: Full=Pectin methylesterase 1; Flags: Precursor;	A0A835I0B4_9MAGN RecName: Full=Pectinesterase {ECO:0000256|RuleBase:RU000589}; EC=3.1.1.11 {ECO:0000256|RuleBase:RU000589};	--	GO:0005576,extracellular region; GO:0045330,aspartyl esterase activity; GO:0030599,pectinesterase activity; GO:0046910,pectinesterase inhibitor activity; GO:0042545,cell wall modification; GO:0009835,fruit ripening; GO:0045490,pectin catabolic process; GO:0003674,molecular_function; GO:0003824,catalytic activity; GO:0016787,hydrolase activity; GO:0016788,hydrolase activity, acting on ester bonds;…	PF01095.22:Pectinesterase
IFM89_003386	K23260 scopoletin glucosyltransferase [EC:2.4.1.128] | (RefSeq) scopoletin glucosyltransferase (A)	ko00999: Biosynthesis of various plant secondary metabolites; ko01110: Biosynthesis of secondary metabolites	hypothetical protein IFM89_003386 [Coptis chinensis]	U89B2_STERE RecName: Full=UDP-glycosyltransferase 89B2 {ECO:0000303|PubMed:15610349}; EC=2.4.1.- {ECO:0000305};	A0A835IT16_9MAGN SubName: Full=Uncharacterized protein {ECO:0000313|EMBL:KAF9623596.1};	UDP-glucuronosyl and UDP-glucosyl transferase	GO:0008194,UDP-glycosyltransferase activity; GO:0003674,molecular_function; GO:0003824,catalytic activity; GO:0016740,transferase activity; GO:0016757,glycosyltransferase activity	PF00201.21:UDP-glucoronosyl and UDP-glucosyl transferase
novel.2381	K09338 homeobox-leucine zipper protein | (RefSeq) homeobox-leucine zipper protein MERISTEM L1 (A)	--	hypothetical protein IFM89_035728 [Coptis chinensis]	ROC3_ORYSI RecName: Full=Homeobox-leucine zipper protein ROC3; AltName: Full=GLABR 2-like homeobox protein 3; AltName: Full=HD-ZIP protein ROC3; AltName: Full=Homeodomain transcription factor ROC3; AltName: Full=Protein RICE OUTERMOST CELL-SPECIFIC 3;	A0A835GZW9_9MAGN RecName: Full=F-box domain-containing protein {ECO:0000259|PROSITE:PS50181};	--	GO:0005634,nucleus; GO:0003677,DNA binding; GO:0000981,DNA-binding transcription factor activity, RNA polymerase II-specific; GO:0008289,lipid binding; GO:0003674,molecular_function; GO:0003676,nucleic acid binding; GO:0005488,binding; GO:0097159,organic cyclic compound binding; GO:1901363,heterocyclic compound binding; GO:0003700,DNA-binding transcription factor activity; GO:0140110,transcriptio…	--
IFM89_004945	--	--	hypothetical protein IFM89_004945 [Coptis chinensis]	HIR1_ARATH RecName: Full=Hypersensitive-induced response protein 1 {ECO:0000303|PubMed:15060130}; Short=AtHIR1 {ECO:0000303|PubMed:15060130};	A0A835LUX6_9MAGN RecName: Full=PHB domain-containing protein {ECO:0000259|SMART:SM00244};	Prohibitins and stomatins of the PID superfamily	GO:0005794,Golgi apparatus; GO:0000325,plant-type vacuole; GO:0005886,plasma membrane; GO:0009506,plasmodesma; GO:0009536,plastid; GO:0043424,protein histidine kinase binding; GO:0003674,molecular_function; GO:0005488,binding; GO:0005515,protein binding; GO:0019899,enzyme binding; GO:0019900,kinase binding; GO:0019901,protein kinase binding; GO:0005575,cellular_component; GO:0005622,intracellular…	PF01145.28:SPFH domain / Band 7 family
IFM89_028656	K08235 xyloglucan:xyloglucosyl transferase [EC:2.4.1.207] | (RefSeq) xyloglucan endotransglucosylase/hydrolase 2-like (A)	--	hypothetical protein IFM89_028656, partial [Coptis chinensis]	XTH1_DIOKA RecName: Full=Xyloglucan endotransglucosylase protein 1 {ECO:0000305}; Short=XET protein 1 {ECO:0000305}; EC=2.4.1.207 {ECO:0000255|RuleBase:RU361120, ECO:0000269|PubMed:25849978}; AltName: Full=DkXTH1 {ECO:0000303|PubMed:23265513, ECO:0000303|PubMed:25849978, ECO:0000303|PubMed:28155115}; AltName: Full=Xyloglucan endotransglucosylase/hydrolase protein 1 {ECO:0000305}; Short=XTH protei…	A0A835LER8_9MAGN RecName: Full=Xyloglucan endotransglucosylase/hydrolase {ECO:0000256|RuleBase:RU361120}; EC=2.4.1.207 {ECO:0000256|RuleBase:RU361120}; Flags: Fragment;	--	GO:0048046,apoplast; GO:0004553,hydrolase activity, hydrolyzing O-glycosyl compounds; GO:0016762,xyloglucan:xyloglucosyl transferase activity; GO:0042546,cell wall biogenesis; GO:0071555,cell wall organization; GO:0009835,fruit ripening; GO:0010411,xyloglucan metabolic process; GO:0003674,molecular_function; GO:0003824,catalytic activity; GO:0016787,hydrolase activity; GO:0016798,hydrolase activi…	PF00722.24:Glycosyl hydrolases family 16
IFM89_021490	--	--	hypothetical protein IFM89_021490 [Coptis chinensis]	FBK30_ARATH RecName: Full=F-box/kelch-repeat protein At1g80440;	A0A835LN29_9MAGN RecName: Full=F-box domain-containing protein {ECO:0000259|SMART:SM00256};	FOG: Kelch repeat	GO:0005829,cytosol; GO:0019005,SCF ubiquitin ligase complex; GO:0080037,negative regulation of cytokinin-activated signaling pathway; GO:2000762,regulation of phenylpropanoid metabolic process; GO:0007154,cell communication; GO:0007165,signal transduction; GO:0008150,biological_process; GO:0009719,response to endogenous stimulus; GO:0009725,response to hormone; GO:0009735,response to cytokinin; G…	PF01344.28:Kelch motif
IFM89_000343	K06268 serine/threonine-protein phosphatase 2B regulatory subunit | (RefSeq) uncharacterized protein LOC109740273 (A)	--	hypothetical protein IFM89_000343 [Coptis chinensis]	MYOB7_ARATH RecName: Full=Myosin-binding protein 7 {ECO:0000303|PubMed:23995081};	A0A835HAH8_9MAGN RecName: Full=GTD-binding domain-containing protein {ECO:0000259|PROSITE:PS51775};	--	GO:0016021,integral component of membrane; GO:0030133,transport vesicle; GO:0017022,myosin binding; GO:0080115,myosin XI tail binding; GO:0003674,molecular_function; GO:0005488,binding; GO:0005515,protein binding; GO:0008092,cytoskeletal protein binding; GO:0032029,myosin tail binding; GO:0032036,myosin heavy chain binding; GO:0005575,cellular_component; GO:0016020,membrane; GO:0031224,intrinsic …	PF04576.18:Zein-binding
IFM89_001539	K13141 integrator complex subunit 4 | (RefSeq) protein SIEL-like (A)	--	hypothetical protein IFM89_001539 [Coptis chinensis]	TOL6_ARATH RecName: Full=TOM1-like protein 6 {ECO:0000305};	A0A835HCI8_9MAGN SubName: Full=Uncharacterized protein {ECO:0000313|EMBL:KAF9595638.1};	Cytosolic sorting protein GGA2/TOM1	GO:0005737,cytoplasm; GO:0005769,early endosome; GO:0031901,early endosome membrane; GO:0005771,multivesicular body; GO:0035091,phosphatidylinositol binding; GO:0043130,ubiquitin binding; GO:0043328,protein transport to vacuole involved in ubiquitin-dependent protein catabolic process via the multivesicular body sorting pathway; GO:0003674,molecular_function; GO:0005488,binding; GO:0005543,phosph…	PF00790.22:VHS domain
IFM89_039663	K13430 serine/threonine-protein kinase PBS1 [EC:2.7.11.1] | (RefSeq) serine/threonine-protein kinase CDL1-like (A)	ko04626: Plant-pathogen interaction	hypothetical protein IFM89_039663 [Coptis chinensis]	SRF6_ARATH RecName: Full=Protein STRUBBELIG-RECEPTOR FAMILY 6; AltName: Full=Leucine-rich repeat receptor kinase-like protein SRF6; Flags: Precursor;	A0A835GT89_9MAGN RecName: Full=Protein kinase domain-containing protein {ECO:0000259|PROSITE:PS50011};	--	GO:0016021,integral component of membrane; GO:0005886,plasma membrane; GO:0005524,ATP binding; GO:0004714,transmembrane receptor protein tyrosine kinase activity; GO:0006468,protein phosphorylation; GO:0000166,nucleotide binding; GO:0003674,molecular_function; GO:0005488,binding; GO:0017076,purine nucleotide binding; GO:0030554,adenyl nucleotide binding; GO:0032553,ribonucleotide binding; GO:0032…	PF07714.20:Protein tyrosine and serine/threonine kinase
IFM89_003576	K13413 mitogen-activated protein kinase kinase 4/5 [EC:2.7.12.2] | (RefSeq) mitogen-activated protein kinase kinase 5-like (A)	ko04016: MAPK signaling pathway - plant; ko04075: Plant hormone signal transduction; ko04626: Plant-pathogen interaction	hypothetical protein IFM89_003576 [Coptis chinensis]	LSH4_ARATH RecName: Full=Protein LIGHT-DEPENDENT SHORT HYPOCOTYLS 4; AltName: Full=Protein ORGAN BOUNDARY 4;	A0A835I1B0_9MAGN RecName: Full=ALOG domain-containing protein {ECO:0000259|PROSITE:PS51697};	--	GO:0005634,nucleus; GO:0003677,DNA binding; GO:0009299,mRNA transcription; GO:0090698,post-embryonic plant morphogenesis; GO:0009416,response to light stimulus; GO:0003674,molecular_function; GO:0003676,nucleic acid binding; GO:0005488,binding; GO:0097159,organic cyclic compound binding; GO:1901363,heterocyclic compound binding; GO:0006139,nucleobase-containing compound metabolic process; GO:0006…	PF04852.15:ALOG domain
IFM89_026374	K16281 RING-H2 zinc finger protein RHA1 | (RefSeq) E3 ubiquitin-protein ligase ATL4 (A)	--	hypothetical protein IFM89_026374 [Coptis chinensis]	BRH1_ARATH RecName: Full=Brassinosteroid-responsive RING protein 1 {ECO:0000303|PubMed:12012249};	A0A835M145_9MAGN RecName: Full=RING-type domain-containing protein {ECO:0000259|PROSITE:PS50089};	FOG: Predicted E3 ubiquitin ligase	GO:0016021,integral component of membrane; GO:0061630,ubiquitin protein ligase activity; GO:0008270,zinc ion binding; GO:0009742,brassinosteroid mediated signaling pathway; GO:0016567,protein ubiquitination; GO:1901371,regulation of leaf morphogenesis; GO:1905421,regulation of plant organ morphogenesis; GO:0009741,response to brassinosteroid; GO:0010200,response to chitin; GO:0003674,molecular_fu…	PF13639.9:Ring finger domain
IFM89_037587	K14674 TAG lipase / steryl ester hydrolase / phospholipase A2 / LPA acyltransferase [EC:3.1.1.3 3.1.1.13 3.1.1.4 2.3.1.51] | (RefSeq) triacylglycerol lipase SDP1 (A)	ko00100: Steroid biosynthesis; ko00561: Glycerolipid metabolism; ko00564: Glycerophospholipid metabolism; ko00565: Ether lipid metabolism; ko00590: Arachidonic acid metabolism; ko00591: Linoleic acid metabolism; ko00592: alpha-Linolenic acid metabolism; ko01100: Metabolic pathways; ko01110: Biosynthesis of secondary metabolites	hypothetical protein IFM89_037587 [Coptis chinensis]	SDP1_ARATH RecName: Full=Triacylglycerol lipase SDP1 {ECO:0000303|PubMed:16473965}; EC=3.1.1.3 {ECO:0000269|PubMed:16473965}; AltName: Full=Protein SUGAR-DEPENDENT 1 {ECO:0000303|PubMed:16473965};	A0A835HBL2_9MAGN RecName: Full=PNPLA domain-containing protein {ECO:0000259|PROSITE:PS51635};	Predicted esterase of the alpha-beta hydrolase superfamily	GO:0016020,membrane; GO:0012511,monolayer-surrounded lipid storage body; GO:0005777,peroxisome; GO:0004806,triglyceride lipase activity; GO:0006071,glycerol metabolic process; GO:0019433,triglyceride catabolic process; GO:0006641,triglyceride metabolic process; GO:0003674,molecular_function; GO:0003824,catalytic activity; GO:0016298,lipase activity; GO:0016787,hydrolase activity; GO:0016788,hydro…	PF11815.11:Domain of unknown function (DUF3336)
novel.45	--	--	--	--	--	--	--	--
IFM89_013778	K02930 large subunit ribosomal protein L4e | (RefSeq) 60S ribosomal protein L4-like (A)	ko03010: Ribosome	hypothetical protein IFM89_013778 [Coptis chinensis]	FLZ8_ARATH RecName: Full=FCS-Like Zinc finger 8 {ECO:0000303|PubMed:24901469};	A0A835LR67_9MAGN RecName: Full=FLZ-type domain-containing protein {ECO:0000259|PROSITE:PS51795};	--	GO:0046872,metal ion binding; GO:0071456,cellular response to hypoxia; GO:0009749,response to glucose; GO:0042594,response to starvation; GO:0009744,response to sucrose; GO:0003674,molecular_function; GO:0005488,binding; GO:0043167,ion binding; GO:0043169,cation binding; GO:0001666,response to hypoxia; GO:0006950,response to stress; GO:0008150,biological_process; GO:0009628,response to abiotic st…	PF04570.17:zinc-finger of the FCS-type, C2-C2
IFM89_032926	K06123 1-acylglycerone phosphate reductase [EC:1.1.1.101] | (RefSeq) hypothetical protein (A)	ko00564: Glycerophospholipid metabolism; ko00565: Ether lipid metabolism; ko01100: Metabolic pathways	hypothetical protein IFM89_032926 [Coptis chinensis]	HSDA_SESIN RecName: Full=11-beta-hydroxysteroid dehydrogenase A {ECO:0000305}; EC=1.1.1.- {ECO:0000269|PubMed:11950969, ECO:0000269|PubMed:15331088}; AltName: Full=17-beta-hydroxysteroid dehydrogenase A {ECO:0000305}; EC=1.1.1.62 {ECO:0000269|PubMed:11950969, ECO:0000269|PubMed:15331088}; AltName: Full=Seed oil body protein 2 {ECO:0000303|PubMed:11950969, ECO:0000303|PubMed:15331088}; AltName: Fu…	A0A835I6B9_9MAGN SubName: Full=Uncharacterized protein {ECO:0000313|EMBL:KAF9611526.1};	1-Acyl dihydroxyacetone phosphate reductase and related dehydrogenases	GO:0016021,integral component of membrane; GO:0005811,lipid droplet; GO:0070523,11-beta-hydroxysteroid dehydrogenase (NAD+) activity; GO:0070524,11-beta-hydroxysteroid dehydrogenase (NADP+) activity; GO:0044594,17-beta-hydroxysteroid dehydrogenase (NAD+) activity; GO:0003674,molecular_function; GO:0003824,catalytic activity; GO:0003845,11-beta-hydroxysteroid dehydrogenase [NAD(P)] activity; GO:00…	PF00106.28:short chain dehydrogenase
IFM89_037861	K19040 E3 ubiquitin-protein ligase ATL10/75/76/77/78 [EC:2.3.2.27] | (RefSeq) RING-H2 finger protein ATL79 (A)	--	hypothetical protein IFM89_037861 [Coptis chinensis]	ATL79_ARATH RecName: Full=RING-H2 finger protein ATL79; EC=2.3.2.27 {ECO:0000305}; AltName: Full=RING-type E3 ubiquitin transferase ATL79 {ECO:0000305}; Flags: Precursor;	A0A835LQJ8_9MAGN RecName: Full=RING-type domain-containing protein {ECO:0000259|PROSITE:PS50089};	FOG: Predicted E3 ubiquitin ligase	GO:0016021,integral component of membrane; GO:0046872,metal ion binding; GO:0016740,transferase activity; GO:0016567,protein ubiquitination; GO:0003674,molecular_function; GO:0005488,binding; GO:0043167,ion binding; GO:0043169,cation binding; GO:0003824,catalytic activity; GO:0006807,nitrogen compound metabolic process; GO:0008150,biological_process; GO:0008152,metabolic process; GO:0019538,prote…	PF13639.9:Ring finger domain
IFM89_005217	K23136 fraxetin 5-hydroxylase [EC:1.14.14.164] | (RefSeq) cytochrome P450 CYP82D47-like (A)	ko00999: Biosynthesis of various plant secondary metabolites; ko01110: Biosynthesis of secondary metabolites	hypothetical protein IFM89_005217 [Coptis chinensis]	C82D6_SINHE RecName: Full=Demethylepipodophyllotoxin synthase {ECO:0000303|PubMed:26359402}; EC=1.14.14.132 {ECO:0000269|PubMed:26359402}; AltName: Full=Cytochrome P450 family 82 subfamily D polypeptide 61 {ECO:0000303|PubMed:26359402};	A0A835H2Y8_9MAGN SubName: Full=Uncharacterized protein {ECO:0000313|EMBL:KAF9591636.1};	Cytochrome P450 CYP2 subfamily	GO:0016021,integral component of membrane; GO:0020037,heme binding; GO:0005506,iron ion binding; GO:0004497,monooxygenase activity; GO:0016705,oxidoreductase activity, acting on paired donors, with incorporation or reduction of molecular oxygen; GO:0019438,aromatic compound biosynthetic process; GO:0009699,phenylpropanoid biosynthetic process; GO:0003674,molecular_function; GO:0005488,binding; GO…	PF00067.25:Cytochrome P450
IFM89_018855	K08818 cell division cycle 2-like [EC:2.7.11.22] | (RefSeq) cyclin-dependent kinase G-2 (A)	--	hypothetical protein IFM89_018855 [Coptis chinensis]	CDKG2_ORYSI RecName: Full=Cyclin-dependent kinase G-2; Short=CDKG;2; EC=2.7.11.22; EC=2.7.11.23;	A0A835HTT7_9MAGN RecName: Full=Cyclin-dependent kinase {ECO:0000256|ARBA:ARBA00012425}; EC=2.7.11.22 {ECO:0000256|ARBA:ARBA00012425};	Protein kinase PITSLRE and related kinases	GO:0005524,ATP binding; GO:0004693,cyclin-dependent protein serine/threonine kinase activity; GO:0106310,protein serine kinase activity; GO:0008353,RNA polymerase II CTD heptapeptide repeat kinase activity; GO:0006468,protein phosphorylation; GO:0000166,nucleotide binding; GO:0003674,molecular_function; GO:0005488,binding; GO:0017076,purine nucleotide binding; GO:0030554,adenyl nucleotide binding…	PF00069.28:Protein kinase domain
IFM89_032113	K21692 methyltetrahydroprotoberberine 14-monooxygenase [EC:1.14.14.97] | (RefSeq) methyltetrahydroprotoberberine 14-monooxygenase (A)	ko00950: Isoquinoline alkaloid biosynthesis; ko01100: Metabolic pathways; ko01110: Biosynthesis of secondary metabolites	hypothetical protein IFM89_032113 [Coptis chinensis]	MSH_PAPSO RecName: Full=Methyltetrahydroprotoberberine 14-monooxygenase; EC=1.14.14.97 {ECO:0000269|PubMed:23313486}; AltName: Full=(S)-cis-N-methylstylopine 14-hydroxylase; AltName: Full=(S)-cis-N-methyltetrahydroprotoberberine-14-hydroxylase; AltName: Full=Methyltetrahydroprotoberberine 14-hydroxylase; AltName: Full=N-methylstylopine hydroxylase; Short=MSH;	A0A835IT28_9MAGN SubName: Full=Uncharacterized protein {ECO:0000313|EMBL:KAF9622548.1};	Cytochrome P450 CYP2 subfamily	GO:0016021,integral component of membrane; GO:0020037,heme binding; GO:0005506,iron ion binding; GO:0047084,methyltetrahydroprotoberberine 14-monooxygenase activity; GO:0033075,isoquinoline alkaloid biosynthetic process; GO:0003674,molecular_function; GO:0005488,binding; GO:0046906,tetrapyrrole binding; GO:0097159,organic cyclic compound binding; GO:1901363,heterocyclic compound binding; GO:00431…	PF00067.25:Cytochrome P450
IFM89_011801	K15306 Ran-binding protein 1 | (RefSeq) ran-binding protein 1 homolog b (A)	--	hypothetical protein IFM89_011801 [Coptis chinensis]	EBP1_SOLTU RecName: Full=ERBB-3 BINDING PROTEIN 1 {ECO:0000303|PubMed:17024182}; Short=StEBP1 {ECO:0000303|PubMed:17024182};	A0A835H2K7_9MAGN SubName: Full=Uncharacterized protein {ECO:0000313|EMBL:KAF9592051.1};	Metallopeptidase	GO:0005634,nucleus; GO:0003723,RNA binding; GO:0009734,auxin-activated signaling pathway; GO:0044843,cell cycle G1/S phase transition; GO:0051302,regulation of cell division; GO:0001558,regulation of cell growth; GO:0006364,rRNA processing; GO:0003674,molecular_function; GO:0003676,nucleic acid binding; GO:0005488,binding; GO:0097159,organic cyclic compound binding; GO:1901363,heterocyclic compou…	--
IFM89_002703	K15188 cyclin T | (RefSeq) cyclin-T1-4-like (A)	ko03250: Viral life cycle - HIV-1	hypothetical protein IFM89_002703 [Coptis chinensis]	CCT14_ARATH RecName: Full=Cyclin-T1-4; Short=CycT1;4; AltName: Full=Protein AtCycT-like2;	A0A835M4H4_9MAGN RecName: Full=CYCLIN domain-containing protein {ECO:0000259|SMART:SM00385};	CDK9 kinase-activating protein cyclin T	GO:0008024,cyclin/CDK positive transcription elongation factor complex; GO:0005634,nucleus; GO:0061575,cyclin-dependent protein serine/threonine kinase activator activity; GO:0016538,cyclin-dependent protein serine/threonine kinase regulator activity; GO:0007049,cell cycle; GO:0051301,cell division; GO:0032786,positive regulation of DNA-templated transcription, elongation; GO:0006357,regulation o…	PF00134.26:Cyclin, N-terminal domain
IFM89_008416	K22846 S-sulfo-L-cysteine synthase (O-acetyl-L-serine-dependent) [EC:2.5.1.144] | (RefSeq) probable arabinosyltransferase ARAD1 (A)	ko00270: Cysteine and methionine metabolism; ko01100: Metabolic pathways; ko01230: Biosynthesis of amino acids	hypothetical protein IFM89_008416 [Coptis chinensis]	ARAD1_ARATH RecName: Full=Probable arabinosyltransferase ARAD1; EC=2.4.2.-; AltName: Full=Arabinan alpha-1,5-arabinosyltransferase; AltName: Full=L-Arabinosyltransferase; AltName: Full=Protein ARABINAN DEFICIENT 1;	A0A835HDQ2_9MAGN RecName: Full=Exostosin domain-containing protein {ECO:0000259|Pfam:PF03016};	Acetylglucosaminyltransferase EXT1/exostosin 1	GO:0005768,endosome; GO:0005794,Golgi apparatus; GO:0000139,Golgi membrane; GO:0000138,Golgi trans cisterna; GO:0016021,integral component of membrane; GO:0005802,trans-Golgi network; GO:0016757,glycosyltransferase activity; GO:0071555,cell wall organization; GO:0045489,pectin biosynthetic process; GO:0006486,protein glycosylation; GO:0003674,molecular_function; GO:0003824,catalytic activity; GO:…	PF03016.18:Exostosin family
novel.6112	--	--	--	--	--	--	--	--
IFM89_012987	--	--	hypothetical protein IFM89_012987 [Coptis chinensis]	MY1R1_SOLTU RecName: Full=Transcription factor MYB1R1; AltName: Full=Myb-related protein R1 {ECO:0000303|PubMed:21030505}; Short=StMYB1R-1 {ECO:0000303|PubMed:21030505};	A0A835IVY4_9MAGN SubName: Full=Uncharacterized protein {ECO:0000313|EMBL:KAF9624694.1};	--	GO:0005829,cytosol; GO:0005634,nucleus; GO:0000976,transcription cis-regulatory region binding; GO:0010597,green leaf volatile biosynthetic process; GO:0001067,transcription regulatory region nucleic acid binding; GO:0003674,molecular_function; GO:0003676,nucleic acid binding; GO:0003677,DNA binding; GO:0003690,double-stranded DNA binding; GO:0005488,binding; GO:0043565,sequence-specific DNA bind…	--
IFM89_013502	K00549 5-methyltetrahydropteroyltriglutamate--homocysteine methyltransferase [EC:2.1.1.14] | (RefSeq) 5-methyltetrahydropteroyltriglutamate--homocysteine methyltransferase (A)	ko00270: Cysteine and methionine metabolism; ko00450: Selenocompound metabolism; ko01100: Metabolic pathways; ko01110: Biosynthesis of secondary metabolites; ko01230: Biosynthesis of amino acids	hypothetical protein IFM89_013502 [Coptis chinensis]	METE_CATRO RecName: Full=5-methyltetrahydropteroyltriglutamate--homocysteine methyltransferase; EC=2.1.1.14; AltName: Full=Cobalamin-independent methionine synthase isozyme; AltName: Full=Vitamin-B12-independent methionine synthase isozyme;	A0A835H2Z1_9MAGN RecName: Full=5-methyltetrahydropteroyltriglutamate--homocysteine S-methyltransferase {ECO:0000256|ARBA:ARBA00012034}; EC=2.1.1.14 {ECO:0000256|ARBA:ARBA00012034};	Methionine synthase II (cobalamin-independent)	GO:0005737,cytoplasm; GO:0003871,5-methyltetrahydropteroyltriglutamate-homocysteine S-methyltransferase activity; GO:0008270,zinc ion binding; GO:0009086,methionine biosynthetic process; GO:0032259,methylation; GO:0003674,molecular_function; GO:0003824,catalytic activity; GO:0008168,methyltransferase activity; GO:0008172,S-methyltransferase activity; GO:0016740,transferase activity; GO:0016741,tr…	PF01717.21:Cobalamin-independent synthase, Catalytic domain
IFM89_016199	--	--	hypothetical protein IFM89_016199 [Coptis chinensis]	--	A0A835IWT2_9MAGN SubName: Full=Uncharacterized protein {ECO:0000313|EMBL:KAF9624951.1};	--	--	--
IFM89_035125	K22068 iron-sulfur cluster assembly enzyme ISCU, mitochondrial | (RefSeq) iron-sulfur cluster assembly protein 1-like (A)	--	hypothetical protein IFM89_035125 [Coptis chinensis]	ISU1_ARATH RecName: Full=Iron-sulfur cluster assembly protein 1; Short=AtISU1 {ECO:0000303|PubMed:15507320}; Short=AtIscU1 {ECO:0000303|PubMed:19865480}; Short=Protein ISCU-LIKE 1; AltName: Full=NifU-like N-terminal domain-containing protein ISU1; AltName: Full=NifU-like protein ISU1; Flags: Precursor;	A0A835IV89_9MAGN RecName: Full=NifU_N domain-containing protein {ECO:0000259|Pfam:PF01592};	Iron binding protein involved in Fe-S cluster formation	GO:0005737,cytoplasm; GO:0005829,cytosol; GO:0005759,mitochondrial matrix; GO:0005739,mitochondrion; GO:0051537,2 iron, 2 sulfur cluster binding; GO:0008198,ferrous iron binding; GO:0005198,structural molecule activity; GO:0006879,cellular iron ion homeostasis; GO:0016226,iron-sulfur cluster assembly; GO:0003674,molecular_function; GO:0005488,binding; GO:0051536,iron-sulfur cluster binding; GO:00…	PF01592.19:NifU-like N terminal domain
IFM89_015523	--	--	hypothetical protein IFM89_015523 [Coptis chinensis]	--	A0A835IVJ9_9MAGN SubName: Full=Uncharacterized protein {ECO:0000313|EMBL:KAF9624901.1};	--	--	PF06219.15:Protein of unknown function (DUF1005)
IFM89_012090	K11838 ubiquitin carboxyl-terminal hydrolase 7 [EC:3.4.19.12] | (RefSeq) ubiquitin carboxyl-terminal hydrolase 12-like isoform X1 (A)	--	hypothetical protein IFM89_012090, partial [Coptis chinensis]	TRF1A_ARATH RecName: Full=TNF receptor-associated factor homolog 1a {ECO:0000305}; AltName: Full=MATH domain-containing protein At5g43560 {ECO:0000305}; AltName: Full=Protein MUTANT SNC1-ENHANCING 14 {ECO:0000303|PubMed:26867179};	A0A835I3E7_9MAGN RecName: Full=MATH domain-containing protein {ECO:0000259|PROSITE:PS50144}; Flags: Fragment;	--	GO:0005737,cytoplasm; GO:0043424,protein histidine kinase binding; GO:1905037,autophagosome organization; GO:0045087,innate immune response; GO:0003674,molecular_function; GO:0005488,binding; GO:0005515,protein binding; GO:0019899,enzyme binding; GO:0019900,kinase binding; GO:0019901,protein kinase binding; GO:0006914,autophagy; GO:0006996,organelle organization; GO:0007033,vacuole organization; …	PF00917.29:MATH domain
IFM89_003729	K00020 3-hydroxyisobutyrate dehydrogenase [EC:1.1.1.31] | (GenBank) 6-phosphogluconate dehydrogenase-like protein (A)	ko00280: Valine, leucine and isoleucine degradation; ko01100: Metabolic pathways	hypothetical protein IFM89_003729 [Coptis chinensis]	EXOL2_ARATH RecName: Full=Protein EXORDIUM-like 2; Flags: Precursor;	A0A835LUG7_9MAGN SubName: Full=Uncharacterized protein {ECO:0000313|EMBL:KAF9607915.1};	--	GO:0048046,apoplast; GO:0005615,extracellular space; GO:0005794,Golgi apparatus; GO:0009505,plant-type cell wall; GO:0009506,plasmodesma; GO:0009536,plastid; GO:0071456,cellular response to hypoxia; GO:0001666,response to hypoxia; GO:0006950,response to stress; GO:0008150,biological_process; GO:0009628,response to abiotic stimulus; GO:0009987,cellular process; GO:0033554,cellular response to stre…	PF04674.15:Phosphate-induced protein 1 conserved region
IFM89_013261	K09338 homeobox-leucine zipper protein | (RefSeq) homeobox-leucine zipper protein ATHB-13-like (A)	--	hypothetical protein IFM89_013261 [Coptis chinensis]	--	A0A835IWS1_9MAGN SubName: Full=Uncharacterized protein {ECO:0000313|EMBL:KAF9624723.1};	--	--	PF01497.21:Periplasmic binding protein
IFM89_035055	K14485 transport inhibitor response 1 | (RefSeq) protein TRANSPORT INHIBITOR RESPONSE 1-like (A)	ko04075: Plant hormone signal transduction	hypothetical protein IFM89_035055 [Coptis chinensis]	TIR1B_ORYSJ RecName: Full=Transport inhibitor response 1-like protein Os04g0395600; Short=TIR1-like protein;	A0A835LKG2_9MAGN SubName: Full=Uncharacterized protein {ECO:0000313|EMBL:KAF9594894.1};	Leucine rich repeat proteins, some proteins contain F-box	GO:0005634,nucleus; GO:0019005,SCF ubiquitin ligase complex; GO:0010011,auxin binding; GO:0000822,inositol hexakisphosphate binding; GO:0009734,auxin-activated signaling pathway; GO:0016567,protein ubiquitination; GO:0031146,SCF-dependent proteasomal ubiquitin-dependent protein catabolic process; GO:0003674,molecular_function; GO:0005488,binding; GO:0042562,hormone binding; GO:0036094,small molec…	PF18791.4:Transport inhibitor response 1 protein domain
novel.1088	K18158 nuclear control of ATPase protein 2 | (RefSeq) protein DGS1, mitochondrial-like (A)	--	hypothetical protein IFM89_015942 [Coptis chinensis]	--	A0A835LIR7_9MAGN RecName: Full=DUF4283 domain-containing protein {ECO:0000259|Pfam:PF14111};	FOG: Reverse transcriptase	GO:0016021,integral component of membrane; GO:0005575,cellular_component; GO:0016020,membrane; GO:0031224,intrinsic component of membrane; GO:0110165,cellular anatomical entity	PF14111.9:Domain of unknown function (DUF4283)
IFM89_037705	K14638 solute carrier family 15 (peptide/histidine transporter), member 3/4 | (RefSeq) protein NRT1/ PTR FAMILY 5.10-like (A)	--	hypothetical protein IFM89_037705 [Coptis chinensis]	PTR10_ARATH RecName: Full=Protein NRT1/ PTR FAMILY 5.16; Short=AtNPF5.16;	A0A835IJR8_9MAGN SubName: Full=Uncharacterized protein {ECO:0000313|EMBL:KAF9617642.1};	H+/oligopeptide symporter	GO:0016021,integral component of membrane; GO:0009705,plant-type vacuole membrane; GO:0071916,dipeptide transmembrane transporter activity; GO:0080054,low-affinity nitrate transmembrane transporter activity; GO:0042937,tripeptide transmembrane transporter activity; GO:0015706,nitrate transmembrane transport; GO:0003674,molecular_function; GO:0005215,transporter activity; GO:0022857,transmembrane …	--
IFM89_001660	K08272 calcium binding protein 39 | (RefSeq) putative MO25-like protein At5g47540 (A)	--	hypothetical protein IFM89_001660 [Coptis chinensis]	SEUSS_ARATH RecName: Full=Transcriptional corepressor SEUSS; Short=AtSEU;	A0A835HHU3_9MAGN SubName: Full=Uncharacterized protein {ECO:0000313|EMBL:KAF9599714.1};	--	GO:0005654,nucleoplasm; GO:0005634,nucleus; GO:0005667,transcription regulator complex; GO:0003677,DNA binding; GO:0046982,protein heterodimerization activity; GO:0003714,transcription corepressor activity; GO:0030154,cell differentiation; GO:0006974,cellular response to DNA damage stimulus; GO:0071217,cellular response to external biotic stimulus; GO:0009793,embryo development ending in seed dor…	PF01803.19:LIM-domain binding protein
IFM89_032856	K22983 cytochrome P450 family 76 subfamily A | (RefSeq) cytochrome P450 76A2-like (A)	--	hypothetical protein IFM89_032856 [Coptis chinensis]	C80G2_COPJA RecName: Full=Corytuberine synthase {ECO:0000312|EMBL:BAF80448.1}; EC=1.14.19.51 {ECO:0000269|PubMed:18230623}; AltName: Full=Cytochrome P450 80G2;	A0A835IH32_9MAGN SubName: Full=Uncharacterized protein {ECO:0000313|EMBL:KAF9616894.1};	Cytochrome P450 CYP2 subfamily	GO:0005789,endoplasmic reticulum membrane; GO:0016021,integral component of membrane; GO:0102963,(S)-corytuberine synthase activity; GO:0020037,heme binding; GO:0005506,iron ion binding; GO:0004497,monooxygenase activity; GO:0009820,alkaloid metabolic process; GO:0019438,aromatic compound biosynthetic process; GO:1901362,organic cyclic compound biosynthetic process; GO:0003674,molecular_function;…	PF00067.25:Cytochrome P450
IFM89_033338	K11252 histone H2B | (RefSeq) histone H2B.3-like (A)	--	hypothetical protein IFM89_033338 [Coptis chinensis]	H2B3_SOLLC RecName: Full=Histone H2B.3; AltName: Full=LeH2B-3; Flags: Fragment;	A0A835HLC7_9MAGN RecName: Full=Histone H2B {ECO:0000256|RuleBase:RU000451};	Histone H2B	GO:0000786,nucleosome; GO:0005634,nucleus; GO:0003677,DNA binding; GO:0046982,protein heterodimerization activity; GO:0030527,structural constituent of chromatin; GO:0006334,nucleosome assembly; GO:0003674,molecular_function; GO:0003676,nucleic acid binding; GO:0005488,binding; GO:0097159,organic cyclic compound binding; GO:1901363,heterocyclic compound binding; GO:0005515,protein binding; GO:004…	PF00125.27:Core histone H2A/H2B/H3/H4
novel.4599	--	--	hypothetical protein IFM89_034935 [Coptis chinensis]	--	A0A835M0E6_9MAGN SubName: Full=Uncharacterized protein {ECO:0000313|EMBL:KAF9611752.1};	--	--	--
IFM89_019834	K20718 LRR receptor-like serine/threonine-protein kinase ERECTA [EC:2.7.11.1] | (RefSeq) LRR receptor-like serine/threonine-protein kinase ERECTA isoform X1 (A)	ko04016: MAPK signaling pathway - plant	hypothetical protein IFM89_019834 [Coptis chinensis]	ERECT_ARATH RecName: Full=LRR receptor-like serine/threonine-protein kinase ERECTA {ECO:0000303|PubMed:8624444}; EC=2.7.11.1; AltName: Full=Protein QUANTITATIVE RESISTANCE TO PLECTOSPHAERELLA 1; AltName: Full=Protein QUANTITATIVE RESISTANCE TO RALSTONIA SOLANACEARUM 1; AltName: Full=Protein TRANSPIRATION EFFICIENCY 1; Flags: Precursor;	A0A835IBY5_9MAGN RecName: Full=Protein kinase domain-containing protein {ECO:0000259|PROSITE:PS50011};	--	GO:0016021,integral component of membrane; GO:0005739,mitochondrion; GO:0005886,plasma membrane; GO:0005524,ATP binding; GO:0042277,peptide binding; GO:0106310,protein serine kinase activity; GO:0004674,protein serine/threonine kinase activity; GO:0033612,receptor serine/threonine kinase binding; GO:0005102,signaling receptor binding; GO:0019199,transmembrane receptor protein kinase activity; GO:…	PF00069.28:Protein kinase domain
novel.7061	--	--	hypothetical protein IFM89_011851 [Coptis chinensis]	PERK5_ARATH RecName: Full=Proline-rich receptor-like protein kinase PERK5; EC=2.7.11.1; AltName: Full=Proline-rich extensin-like receptor kinase 5; Short=AtPERK5;	A0A835LUL3_9MAGN SubName: Full=Uncharacterized protein {ECO:0000313|EMBL:KAF9608813.1};	mRNA splicing factor	GO:0016021,integral component of membrane; GO:0005886,plasma membrane; GO:0005524,ATP binding; GO:0106310,protein serine kinase activity; GO:0004674,protein serine/threonine kinase activity; GO:0046777,protein autophosphorylation; GO:0000166,nucleotide binding; GO:0003674,molecular_function; GO:0005488,binding; GO:0017076,purine nucleotide binding; GO:0030554,adenyl nucleotide binding; GO:0032553…	PF09750.12:Alternative splicing regulator
IFM89_022334	K14494 DELLA protein | (RefSeq) DELLA protein RGL1 (A)	ko04075: Plant hormone signal transduction	hypothetical protein IFM89_022334 [Coptis chinensis]	SCL1_ARATH RecName: Full=Scarecrow-like protein 1; Short=AtSCL1; AltName: Full=GRAS family protein 4; Short=AtGRAS-4;	A0A835I713_9MAGN SubName: Full=Uncharacterized protein {ECO:0000313|EMBL:KAF9610423.1};	--	GO:0005634,nucleus; GO:0003700,DNA-binding transcription factor activity; GO:0043565,sequence-specific DNA binding; GO:0000976,transcription cis-regulatory region binding; GO:0006355,regulation of DNA-templated transcription; GO:0003674,molecular_function; GO:0140110,transcription regulator activity; GO:0003676,nucleic acid binding; GO:0003677,DNA binding; GO:0005488,binding; GO:0097159,organic c…	PF03514.17:GRAS domain family
IFM89_022594	K00826 branched-chain amino acid aminotransferase [EC:2.6.1.42] | (RefSeq) branched-chain-amino-acid aminotransferase 3, chloroplastic-like (A)	ko00270: Cysteine and methionine metabolism; ko00280: Valine, leucine and isoleucine degradation; ko00290: Valine, leucine and isoleucine biosynthesis; ko00770: Pantothenate and CoA biosynthesis; ko00966: Glucosinolate biosynthesis; ko01100: Metabolic pathways; ko01110: Biosynthesis of secondary metabolites; ko01210: 2-Oxocarboxylic acid metabolism; ko01230: Biosynthesis of amino acids; ko01240: …	hypothetical protein IFM89_022594, partial [Coptis chinensis]	BCAT3_ARATH RecName: Full=Branched-chain-amino-acid aminotransferase 3, chloroplastic {ECO:0000303|PubMed:12068099}; Short=Atbcat-3; EC=2.6.1.42; EC=2.6.1.88; Flags: Precursor;	A0A835IF62_9MAGN RecName: Full=Branched-chain-amino-acid aminotransferase {ECO:0000256|RuleBase:RU004517}; EC=2.6.1.42 {ECO:0000256|RuleBase:RU004517}; Flags: Fragment;	Branched chain aminotransferase BCAT1, pyridoxal phosphate enzymes type IV superfamily	GO:0009507,chloroplast; GO:0009570,chloroplast stroma; GO:0004084,branched-chain-amino-acid transaminase activity; GO:0052656,L-isoleucine transaminase activity; GO:0052654,L-leucine transaminase activity; GO:0050048,L-leucine:2-oxoglutarate aminotransferase activity; GO:0052655,L-valine transaminase activity; GO:0009097,isoleucine biosynthetic process; GO:0009098,leucine biosynthetic process; GO…	PF01063.22:Amino-transferase class IV
IFM89_018667	K12667 oligosaccharyltransferase complex subunit delta (ribophorin II) | (RefSeq) dolichyl-diphosphooligosaccharide--protein glycosyltransferase subunit 2 (A)	ko00510: N-Glycan biosynthesis; ko00513: Various types of N-glycan biosynthesis; ko01100: Metabolic pathways; ko04141: Protein processing in endoplasmic reticulum	hypothetical protein IFM89_018667 [Coptis chinensis]	RPN2_ORYSJ RecName: Full=Dolichyl-diphosphooligosaccharide--protein glycosyltransferase subunit 2; AltName: Full=Ribophorin II; Short=RPN-II; AltName: Full=Ribophorin-2; Flags: Precursor;	A0A835I4F3_9MAGN RecName: Full=Dolichyl-diphosphooligosaccharide--protein glycosyltransferase subunit 2 {ECO:0000256|RuleBase:RU366029}; AltName: Full=Ribophorin-2 {ECO:0000256|RuleBase:RU366029};	Oligosaccharyltransferase, delta subunit (ribophorin II)	GO:0016021,integral component of membrane; GO:0008250,oligosaccharyltransferase complex; GO:0006487,protein N-linked glycosylation; GO:0009409,response to cold; GO:0006486,protein glycosylation; GO:0006807,nitrogen compound metabolic process; GO:0008150,biological_process; GO:0008152,metabolic process; GO:0009058,biosynthetic process; GO:0009059,macromolecule biosynthetic process; GO:0009100,glyc…	PF05817.17:Oligosaccharyltransferase subunit Ribophorin II
IFM89_013445	--	--	hypothetical protein IFM89_013445 [Coptis chinensis]	--	A0A835LAW2_9MAGN SubName: Full=Uncharacterized protein {ECO:0000313|EMBL:KAF9588593.1};	--	--	--
IFM89_016955	K03676 glutaredoxin 3 | (RefSeq) monothiol glutaredoxin-S2-like (A)	--	hypothetical protein IFM89_016955 [Coptis chinensis]	GRXS2_ARATH RecName: Full=Monothiol glutaredoxin-S2; Short=AtGrxS2; AltName: Full=Protein ROXY 10;	A0A835LRF4_9MAGN RecName: Full=Glutaredoxin domain-containing protein {ECO:0000259|Pfam:PF00462};	Glutaredoxin and related proteins	GO:0005737,cytoplasm; GO:0051537,2 iron, 2 sulfur cluster binding; GO:0097573,glutathione oxidoreductase activity; GO:0046872,metal ion binding; GO:0000122,negative regulation of transcription by RNA polymerase II; GO:0003674,molecular_function; GO:0005488,binding; GO:0051536,iron-sulfur cluster binding; GO:0051540,metal cluster binding; GO:0003824,catalytic activity; GO:0015035,protein-disulfide…	PF00462.27:Glutaredoxin
IFM89_007493	K07213 copper chaperone | (RefSeq) hypothetical protein (A)	--	hypothetical protein IFM89_007493 [Coptis chinensis]	HIP3_ARATH RecName: Full=Heavy metal-associated isoprenylated plant protein 3 {ECO:0000303|PubMed:21072340, ECO:0000303|PubMed:23368984}; Short=AtHIP03 {ECO:0000303|PubMed:21072340, ECO:0000303|PubMed:23368984}; Short=AtHIPP3 {ECO:0000303|PubMed:21072340, ECO:0000303|PubMed:23368984}; Flags: Precursor;	A0A835HBT6_9MAGN RecName: Full=HMA domain-containing protein {ECO:0000259|PROSITE:PS50846};	Copper chaperone	GO:0005737,cytoplasm; GO:0005730,nucleolus; GO:0005634,nucleus; GO:0008270,zinc ion binding; GO:0009910,negative regulation of flower development; GO:0003674,molecular_function; GO:0005488,binding; GO:0043167,ion binding; GO:0043169,cation binding; GO:0046872,metal ion binding; GO:0046914,transition metal ion binding; GO:0000003,reproduction; GO:0003006,developmental process involved in reproduct…	PF00403.29:Heavy-metal-associated domain
novel.4019	K12448 UDP-arabinose 4-epimerase [EC:5.1.3.5] | (RefSeq) UDP-arabinose 4-epimerase 1-like (A)	ko00520: Amino sugar and nucleotide sugar metabolism; ko01100: Metabolic pathways; ko01250: Biosynthesis of nucleotide sugars	hypothetical protein IFM89_024992 [Coptis chinensis]	MAIL1_ARATH RecName: Full=Protein MAIN-LIKE 1 {ECO:0000303|PubMed:24635680};	A0A835LX18_9MAGN RecName: Full=PMD domain-containing protein {ECO:0000259|Pfam:PF10536};	--	GO:0005634,nucleus; GO:0008483,transaminase activity; GO:0010073,meristem maintenance; GO:0010082,regulation of root meristem growth; GO:0003674,molecular_function; GO:0003824,catalytic activity; GO:0016740,transferase activity; GO:0016769,transferase activity, transferring nitrogenous groups; GO:0008150,biological_process; GO:0009888,tissue development; GO:0032501,multicellular organismal proces…	PF10536.12:Plant mobile domain
IFM89_013505	K00549 5-methyltetrahydropteroyltriglutamate--homocysteine methyltransferase [EC:2.1.1.14] | (RefSeq) 5-methyltetrahydropteroyltriglutamate--homocysteine methyltransferase (A)	ko00270: Cysteine and methionine metabolism; ko00450: Selenocompound metabolism; ko01100: Metabolic pathways; ko01110: Biosynthesis of secondary metabolites; ko01230: Biosynthesis of amino acids	hypothetical protein IFM89_013505 [Coptis chinensis]	METE_CATRO RecName: Full=5-methyltetrahydropteroyltriglutamate--homocysteine methyltransferase; EC=2.1.1.14; AltName: Full=Cobalamin-independent methionine synthase isozyme; AltName: Full=Vitamin-B12-independent methionine synthase isozyme;	A0A835H522_9MAGN RecName: Full=5-methyltetrahydropteroyltriglutamate--homocysteine S-methyltransferase {ECO:0000256|ARBA:ARBA00012034}; EC=2.1.1.14 {ECO:0000256|ARBA:ARBA00012034};	Methionine synthase II (cobalamin-independent)	GO:0005737,cytoplasm; GO:0003871,5-methyltetrahydropteroyltriglutamate-homocysteine S-methyltransferase activity; GO:0008270,zinc ion binding; GO:0009086,methionine biosynthetic process; GO:0032259,methylation; GO:0003674,molecular_function; GO:0003824,catalytic activity; GO:0008168,methyltransferase activity; GO:0008172,S-methyltransferase activity; GO:0016740,transferase activity; GO:0016741,tr…	PF01717.21:Cobalamin-independent synthase, Catalytic domain
IFM89_012607	K21692 methyltetrahydroprotoberberine 14-monooxygenase [EC:1.14.14.97] | (RefSeq) methyltetrahydroprotoberberine 14-monooxygenase (A)	ko00950: Isoquinoline alkaloid biosynthesis; ko01100: Metabolic pathways; ko01110: Biosynthesis of secondary metabolites	hypothetical protein IFM89_012607 [Coptis chinensis]	MSH_PAPSO RecName: Full=Methyltetrahydroprotoberberine 14-monooxygenase; EC=1.14.14.97 {ECO:0000269|PubMed:23313486}; AltName: Full=(S)-cis-N-methylstylopine 14-hydroxylase; AltName: Full=(S)-cis-N-methyltetrahydroprotoberberine-14-hydroxylase; AltName: Full=Methyltetrahydroprotoberberine 14-hydroxylase; AltName: Full=N-methylstylopine hydroxylase; Short=MSH;	A0A835IMA2_9MAGN SubName: Full=Uncharacterized protein {ECO:0000313|EMBL:KAF9620430.1};	Cytochrome P450 CYP2 subfamily	GO:0016021,integral component of membrane; GO:0020037,heme binding; GO:0005506,iron ion binding; GO:0047084,methyltetrahydroprotoberberine 14-monooxygenase activity; GO:0033075,isoquinoline alkaloid biosynthetic process; GO:0003674,molecular_function; GO:0005488,binding; GO:0046906,tetrapyrrole binding; GO:0097159,organic cyclic compound binding; GO:1901363,heterocyclic compound binding; GO:00431…	PF00067.25:Cytochrome P450
novel.505	K14175 (3S,6E)-nerolidol synthase [EC:4.2.3.48] | (RefSeq) (3S,6E)-nerolidol synthase 1-like (A)	ko00909: Sesquiterpenoid and triterpenoid biosynthesis; ko01100: Metabolic pathways	uncharacterized protein LOC120003113 [Tripterygium wilfordii]	BOB2_ARATH RecName: Full=Protein BOBBER 2;	A0A2N9GED7_FAGSY RecName: Full=RNA-directed DNA polymerase {ECO:0000256|ARBA:ARBA00012493}; EC=2.7.7.49 {ECO:0000256|ARBA:ARBA00012493};	FOG: Transposon-encoded proteins with TYA, reverse transcriptase, integrase domains in various combinations	GO:0005737,cytoplasm; GO:0051082,unfolded protein binding; GO:0006457,protein folding; GO:0003674,molecular_function; GO:0005488,binding; GO:0005515,protein binding; GO:0008150,biological_process; GO:0009987,cellular process; GO:0005575,cellular_component; GO:0005622,intracellular anatomical structure; GO:0110165,cellular anatomical entity	PF13456.9:Reverse transcriptase-like
IFM89_009078	K12900 serine/arginine-rich splicing factor 10 | (RefSeq) serine/arginine-rich SC35-like splicing factor SCL30A (A)	ko03040: Spliceosome	hypothetical protein IFM89_009078 [Coptis chinensis]	EF114_ARATH RecName: Full=Ethylene-responsive transcription factor ERF114 {ECO:0000303|PubMed:16407444}; AltName: Full=ERF bud enhancer {ECO:0000303|PubMed:23616605};	A0A835MDG7_9MAGN RecName: Full=AP2/ERF domain-containing protein {ECO:0000259|PROSITE:PS51032};	--	GO:0005634,nucleus; GO:0003700,DNA-binding transcription factor activity; GO:0000976,transcription cis-regulatory region binding; GO:0050832,defense response to fungus; GO:0009873,ethylene-activated signaling pathway; GO:0003674,molecular_function; GO:0140110,transcription regulator activity; GO:0001067,transcription regulatory region nucleic acid binding; GO:0003676,nucleic acid binding; GO:0003…	PF00847.23:AP2 domain
IFM89_000261	K06676 condensin complex subunit 2 | (RefSeq) condensin complex subunit 2-like (A)	--	hypothetical protein IFM89_000261 [Coptis chinensis]	--	A0A835GV12_9MAGN SubName: Full=Uncharacterized protein {ECO:0000313|EMBL:KAF9587286.1};	--	GO:0016021,integral component of membrane; GO:0005575,cellular_component; GO:0016020,membrane; GO:0031224,intrinsic component of membrane; GO:0110165,cellular anatomical entity	PF05553.14:Cotton fibre expressed protein
IFM89_033610	--	--	hypothetical protein IFM89_033610 [Coptis chinensis]	--	A0A835M5M9_9MAGN SubName: Full=Uncharacterized protein {ECO:0000313|EMBL:KAF9611606.1};	--	--	PF12795.10:Mechanosensitive ion channel porin domain
IFM89_003009	K01229 lactase-phlorizin hydrolase [EC:3.2.1.108 3.2.1.62] | (RefSeq) uncharacterized protein LOC119987970 (A)	ko00052: Galactose metabolism; ko01100: Metabolic pathways	hypothetical protein IFM89_003009 [Coptis chinensis]	BGL44_ARATH RecName: Full=Beta-glucosidase 44; Short=AtBGLU44; EC=3.2.1.21; Flags: Precursor;	A0A835M8P5_9MAGN SubName: Full=Uncharacterized protein {ECO:0000313|EMBL:KAF9623425.1};	Beta-glucosidase, lactase phlorizinhydrolase, and related proteins	GO:0022626,cytosolic ribosome; GO:0005576,extracellular region; GO:0009505,plant-type cell wall; GO:0080081,4-methylumbelliferyl-beta-D-glucopyranoside beta-glucosidase activity; GO:0047668,amygdalin beta-glucosidase activity; GO:0080083,beta-gentiobiose beta-glucosidase activity; GO:0008422,beta-glucosidase activity; GO:0004567,beta-mannosidase activity; GO:0080079,cellobiose glucosidase activit…	PF00232.21:Glycosyl hydrolase family 1
IFM89_039506	K03011 DNA-directed RNA polymerase II subunit RPB3 | (RefSeq) DNA-directed RNA polymerases II, IV and V subunit 3-like (A)	ko03020: RNA polymerase	hypothetical protein IFM89_039506 [Coptis chinensis]	NRPB3_ARATH RecName: Full=DNA-directed RNA polymerases II, IV and V subunit 3; AltName: Full=DNA-directed RNA polymerase II 36 kDa polypeptide A; AltName: Full=DNA-directed RNA polymerase II subunit RPB3-A; Short=RNA polymerase II subunit 3-A; Short=RNA polymerase II subunit B3-A;	A0A835LD03_9MAGN RecName: Full=RPOLD domain-containing protein {ECO:0000259|SMART:SM00662};	RNA polymerase II, subunit POLR2C/RPB3	GO:0005737,cytoplasm; GO:0005730,nucleolus; GO:0005634,nucleus; GO:0005665,RNA polymerase II, core complex; GO:0000418,RNA polymerase IV complex; GO:0000419,RNA polymerase V complex; GO:0003677,DNA binding; GO:0003899,DNA-directed 5'-3' RNA polymerase activity; GO:0046983,protein dimerization activity; GO:0010374,stomatal complex development; GO:0010375,stomatal complex patterning; GO:0006351,DNA…	PF01193.27:RNA polymerase Rpb3/Rpb11 dimerisation domain
IFM89_005636	K14837 nucleolar protein 12 | (RefSeq) nucleolar protein 12 (A)	--	hypothetical protein IFM89_005636 [Coptis chinensis]	--	A0A835IVB3_9MAGN SubName: Full=Uncharacterized protein {ECO:0000313|EMBL:KAF9623868.1};	FOG: RRM domain	GO:0003723,RNA binding; GO:0003674,molecular_function; GO:0003676,nucleic acid binding; GO:0005488,binding; GO:0097159,organic cyclic compound binding; GO:1901363,heterocyclic compound binding	PF00076.25:RNA recognition motif. (a.k.a. RRM, RBD, or RNP domain)
IFM89_001316	K13342 peroxin-5 | (RefSeq) peroxisome biogenesis protein 5 isoform X2 (A)	ko04146: Peroxisome	hypothetical protein IFM89_001316 [Coptis chinensis]	PEX5_ARATH RecName: Full=Peroxisome biogenesis protein 5; AltName: Full=Peroxin-5; Short=AtPEX5; AltName: Full=Peroxisomal targeting signal type 1 receptor; AltName: Full=Pex5p;	A0A835GTI2_9MAGN SubName: Full=Uncharacterized protein {ECO:0000313|EMBL:KAF9587326.1};	TPR repeat-containing protein	GO:0005829,cytosol; GO:0005778,peroxisomal membrane; GO:0009536,plastid; GO:0005052,peroxisome matrix targeting signal-1 binding; GO:0016560,protein import into peroxisome matrix, docking; GO:0006625,protein targeting to peroxisome; GO:0009733,response to auxin; GO:0000268,peroxisome targeting sequence binding; GO:0003674,molecular_function; GO:0005048,signal sequence binding; GO:0005488,binding;…	PF13414.9:TPR repeat
IFM89_021599	--	--	hypothetical protein IFM89_021599 [Coptis chinensis]	--	A0A835IFY4_9MAGN SubName: Full=Uncharacterized protein {ECO:0000313|EMBL:KAF9615028.1};	--	GO:0016021,integral component of membrane; GO:0005575,cellular_component; GO:0016020,membrane; GO:0031224,intrinsic component of membrane; GO:0110165,cellular anatomical entity	--
IFM89_033994	K13946 auxin influx carrier (AUX1 LAX family) | (RefSeq) auxin transporter-like protein 5 (A)	ko04075: Plant hormone signal transduction	hypothetical protein IFM89_033994 [Coptis chinensis]	LAX5_MEDTR RecName: Full=Auxin transporter-like protein 5; AltName: Full=AUX1-like protein 5; AltName: Full=MtLAX5;	A0A835ISG7_9MAGN RecName: Full=Aa_trans domain-containing protein {ECO:0000259|Pfam:PF01490};	Amino acid transporters	GO:0016021,integral component of membrane; GO:0005886,plasma membrane; GO:0015293,symporter activity; GO:0006865,amino acid transport; GO:0009734,auxin-activated signaling pathway; GO:0003674,molecular_function; GO:0005215,transporter activity; GO:0015291,secondary active transmembrane transporter activity; GO:0022804,active transmembrane transporter activity; GO:0022857,transmembrane transporter…	PF01490.21:Transmembrane amino acid transporter protein
IFM89_034316	K01051 pectinesterase [EC:3.1.1.11] | (RefSeq) pectinesterase-like (A)	ko00040: Pentose and glucuronate interconversions; ko01100: Metabolic pathways	hypothetical protein IFM89_034316 [Coptis chinensis]	PMEI9_ARATH RecName: Full=Pectinesterase inhibitor 9 {ECO:0000305}; AltName: Full=Pectin methylesterase inhibitor 9 {ECO:0000303|PubMed:28034952}; Short=AtPMEI9 {ECO:0000303|PubMed:28034952}; Flags: Precursor;	A0A835IDZ3_9MAGN RecName: Full=PMEI domain-containing protein {ECO:0000259|SMART:SM00856};	--	GO:0048046,apoplast; GO:0004857,enzyme inhibitor activity; GO:0046910,pectinesterase inhibitor activity; GO:0043086,negative regulation of catalytic activity; GO:0003674,molecular_function; GO:0030234,enzyme regulator activity; GO:0098772,molecular function regulator activity; GO:0008150,biological_process; GO:0044092,negative regulation of molecular function; GO:0050790,regulation of catalytic a…	PF04043.18:Plant invertase/pectin methylesterase inhibitor
IFM89_015809	K03522 electron transfer flavoprotein alpha subunit | (RefSeq) electron transfer flavoprotein subunit alpha, mitochondrial (A)	--	hypothetical protein IFM89_015809 [Coptis chinensis]	ETFA_ARATH RecName: Full=Electron transfer flavoprotein subunit alpha, mitochondrial; Short=Alpha-ETF; Flags: Precursor;	A0A835IRI8_9MAGN RecName: Full=Electron transfer flavoprotein subunit alpha {ECO:0000256|PIRNR:PIRNR000089}; Short=Alpha-ETF {ECO:0000256|PIRNR:PIRNR000089};	Electron transfer flavoprotein, alpha subunit	GO:0005759,mitochondrial matrix; GO:0005739,mitochondrion; GO:0005634,nucleus; GO:0005507,copper ion binding; GO:0009055,electron transfer activity; GO:0050660,flavin adenine dinucleotide binding; GO:0033539,fatty acid beta-oxidation using acyl-CoA dehydrogenase; GO:0003674,molecular_function; GO:0005488,binding; GO:0043167,ion binding; GO:0043169,cation binding; GO:0046872,metal ion binding; GO:…	PF00766.22:Electron transfer flavoprotein FAD-binding domain
IFM89_032090	K23717 solute carrier family 23 (nucleobase transporter), member 2 | (RefSeq) nucleobase-ascorbate transporter 4 isoform X1 (A)	--	hypothetical protein IFM89_032090 [Coptis chinensis]	NAT3_ARATH RecName: Full=Nucleobase-ascorbate transporter 3; Short=AtNAT3;	A0A835I654_9MAGN SubName: Full=Uncharacterized protein {ECO:0000313|EMBL:KAF9611421.1};	Xanthine/uracil transporters	GO:0016021,integral component of membrane; GO:0005886,plasma membrane; GO:0009506,plasmodesma; GO:0015207,adenine transmembrane transporter activity; GO:0015208,guanine transmembrane transporter activity; GO:0015294,solute:cation symporter activity; GO:0015210,uracil transmembrane transporter activity; GO:0098702,adenine import across plasma membrane; GO:0098710,guanine import across plasma membr…	PF00860.23:Permease family
IFM89_017833	K03327 multidrug resistance protein, MATE family | (RefSeq) protein DETOXIFICATION 33-like (A)	--	hypothetical protein IFM89_017833 [Coptis chinensis]	DTX33_ARATH RecName: Full=Protein DETOXIFICATION 33 {ECO:0000303|PubMed:11739388}; Short=AtDTX33 {ECO:0000303|PubMed:11739388}; AltName: Full=Multidrug and toxic compound extrusion protein 33 {ECO:0000305}; Short=MATE protein 33 {ECO:0000305};	A0A835M0D0_9MAGN RecName: Full=Protein DETOXIFICATION {ECO:0000256|RuleBase:RU004914}; AltName: Full=Multidrug and toxic compound extrusion protein {ECO:0000256|RuleBase:RU004914};	Uncharacterized membrane protein, predicted efflux pump	GO:0016021,integral component of membrane; GO:0016020,membrane; GO:0005634,nucleus; GO:0000325,plant-type vacuole; GO:0015297,antiporter activity; GO:0022857,transmembrane transporter activity; GO:0042910,xenobiotic transmembrane transporter activity; GO:1990961,xenobiotic detoxification by transmembrane export across the plasma membrane; GO:0003674,molecular_function; GO:0005215,transporter acti…	PF01554.21:MatE
novel.8210	K11982 E3 ubiquitin-protein ligase RNF115/126 [EC:2.3.2.27] | (RefSeq) probable E3 ubiquitin-protein ligase RHC1A (A)	--	E3 ubiquitin-protein ligase rzf1 [Thalictrum thalictroides]	RHC1A_ARATH RecName: Full=Probable E3 ubiquitin-protein ligase RHC1A {ECO:0000305}; EC=2.3.2.27; AltName: Full=RING-H2 finger C1a {ECO:0000303|PubMed:9781696}; AltName: Full=RING-H2 zinc finger protein RHC1a {ECO:0000305}; AltName: Full=RING-type E3 ubiquitin transferase RHC1A {ECO:0000305};	A0A7J6VW80_THATH RecName: Full=RING-type E3 ubiquitin transferase {ECO:0000256|ARBA:ARBA00012483}; EC=2.3.2.27 {ECO:0000256|ARBA:ARBA00012483};	FOG: Predicted E3 ubiquitin ligase	GO:0005634,nucleus; GO:0009505,plant-type cell wall; GO:0046872,metal ion binding; GO:0061630,ubiquitin protein ligase activity; GO:0009938,negative regulation of gibberellic acid mediated signaling pathway; GO:0016567,protein ubiquitination; GO:0009651,response to salt stress; GO:0006511,ubiquitin-dependent protein catabolic process; GO:0003674,molecular_function; GO:0005488,binding; GO:0043167,…	PF13639.9:Ring finger domain
IFM89_025976	K02923 large subunit ribosomal protein L38e | (RefSeq) 60S ribosomal protein L38 (A)	ko03010: Ribosome	hypothetical protein IFM89_025976 [Coptis chinensis]	RL38_ARATH RecName: Full=60S ribosomal protein L38;	A0A835IQ21_9MAGN RecName: Full=NB-ARC domain-containing protein {ECO:0000259|Pfam:PF00931};	60S ribosomal protein L38	GO:0005829,cytosol; GO:0022625,cytosolic large ribosomal subunit; GO:0022626,cytosolic ribosome; GO:0003735,structural constituent of ribosome; GO:0022618,ribonucleoprotein complex assembly; GO:0006412,translation; GO:0003674,molecular_function; GO:0005198,structural molecule activity; GO:0008150,biological_process; GO:0009987,cellular process; GO:0016043,cellular component organization; GO:00226…	PF01781.21:Ribosomal L38e protein family
IFM89_031837	K01595 phosphoenolpyruvate carboxylase [EC:4.1.1.31] | (RefSeq) phosphoenolpyruvate carboxylase 2 (A)	ko00620: Pyruvate metabolism; ko00710: Carbon fixation in photosynthetic organisms; ko01100: Metabolic pathways; ko01200: Carbon metabolism	hypothetical protein IFM89_031837 [Coptis chinensis]	CAPPC_FLATR RecName: Full=Phosphoenolpyruvate carboxylase 2 {ECO:0000303|PubMed:12111227}; Short=PEPC 2 {ECO:0000303|PubMed:12111227}; Short=PEPCase 2 {ECO:0000303|PubMed:12111227}; Short=ppcC {ECO:0000303|PubMed:9225854}; EC=4.1.1.31 {ECO:0000269|PubMed:12111227};	A0A835LF57_9MAGN RecName: Full=Phosphoenolpyruvate carboxylase {ECO:0000256|ARBA:ARBA00012305}; EC=4.1.1.31 {ECO:0000256|ARBA:ARBA00012305};	--	GO:0005737,cytoplasm; GO:0008964,phosphoenolpyruvate carboxylase activity; GO:0015977,carbon fixation; GO:0006099,tricarboxylic acid cycle; GO:0003674,molecular_function; GO:0003824,catalytic activity; GO:0004611,phosphoenolpyruvate carboxykinase activity; GO:0016829,lyase activity; GO:0016830,carbon-carbon lyase activity; GO:0016831,carboxy-lyase activity; GO:0008150,biological_process; GO:00081…	PF00311.20:Phosphoenolpyruvate carboxylase
IFM89_038463	K22395 cinnamyl-alcohol dehydrogenase [EC:1.1.1.195] | (RefSeq) berberine bridge enzyme-like 13 (A)	ko00940: Phenylpropanoid biosynthesis; ko01100: Metabolic pathways; ko01110: Biosynthesis of secondary metabolites	hypothetical protein IFM89_038463 [Coptis chinensis]	STOX_BERWI RecName: Full=Tetrahydroberberine oxidase {ECO:0000303|PubMed:3402447}; Short=THB oxidase {ECO:0000305}; EC=1.3.3.8 {ECO:0000269|PubMed:21327819, ECO:0000269|PubMed:3402447}; AltName: Full=(S)-tetrahydroprotoberberine oxidase {ECO:0000303|PubMed:21327819}; Short=BwSTOX {ECO:0000303|PubMed:21327819}; Flags: Precursor;	A0A835H9P5_9MAGN RecName: Full=FAD-binding PCMH-type domain-containing protein {ECO:0000259|PROSITE:PS51387};	--	GO:0071949,FAD binding; GO:0050328,tetrahydroberberine oxidase activity; GO:0000166,nucleotide binding; GO:0003674,molecular_function; GO:0005488,binding; GO:0036094,small molecule binding; GO:0043167,ion binding; GO:0043168,anion binding; GO:0050660,flavin adenine dinucleotide binding; GO:0097159,organic cyclic compound binding; GO:1901265,nucleoside phosphate binding; GO:1901363,heterocyclic co…	PF01565.26:FAD binding domain
IFM89_011834	K24687 AN1-type zinc finger protein 5/6 | (RefSeq) AN1-type zinc finger protein 5-like (A)	--	hypothetical protein IFM89_011834 [Coptis chinensis]	SAP9_ORYSJ RecName: Full=Zinc finger A20 and AN1 domain-containing stress-associated protein 9; Short=OsSAP9;	A0A835H4N7_9MAGN SubName: Full=Uncharacterized protein {ECO:0000313|EMBL:KAF9592084.1};	Predicted Zn-finger protein	GO:0003677,DNA binding; GO:0008270,zinc ion binding; GO:0003674,molecular_function; GO:0003676,nucleic acid binding; GO:0005488,binding; GO:0097159,organic cyclic compound binding; GO:1901363,heterocyclic compound binding; GO:0043167,ion binding; GO:0043169,cation binding; GO:0046872,metal ion binding; GO:0046914,transition metal ion binding	PF01754.19:A20-like zinc finger
IFM89_004531	K13449 pathogenesis-related protein 1 | (RefSeq) pathogenesis-related protein 1-like (A)	ko04016: MAPK signaling pathway - plant; ko04075: Plant hormone signal transduction; ko04626: Plant-pathogen interaction	hypothetical protein IFM89_004531 [Coptis chinensis]	PRB1_TOBAC RecName: Full=Basic form of pathogenesis-related protein 1; Short=PRP 1; Flags: Precursor;	A0A835GUQ0_9MAGN RecName: Full=SCP domain-containing protein {ECO:0000259|SMART:SM00198};	Defense-related protein containing SCP domain	GO:0005615,extracellular space; GO:0006952,defense response; GO:0009607,response to biotic stimulus; GO:0006950,response to stress; GO:0008150,biological_process; GO:0050896,response to stimulus; GO:0005575,cellular_component; GO:0005576,extracellular region; GO:0110165,cellular anatomical entity	PF00188.29:Cysteine-rich secretory protein family
IFM89_036323	K01904 4-coumarate--CoA ligase [EC:6.2.1.12] | (RefSeq) 4-coumarate--CoA ligase-like 6 (A)	ko00130: Ubiquinone and other terpenoid-quinone biosynthesis; ko00940: Phenylpropanoid biosynthesis; ko01100: Metabolic pathways; ko01110: Biosynthesis of secondary metabolites	hypothetical protein IFM89_036323 [Coptis chinensis]	4CLL6_ARATH RecName: Full=4-coumarate--CoA ligase-like 6 {ECO:0000303|PubMed:12805634}; EC=6.2.1.- {ECO:0000305|PubMed:18267944}; AltName: Full=4-coumarate--CoA ligase {ECO:0000303|PubMed:24838974}; EC=6.2.1.12 {ECO:0000269|PubMed:24838974}; AltName: Full=4-coumarate--CoA ligase isoform 7; Short=At4CL7; AltName: Full=4-hydroxybenzoate--CoA ligase {ECO:0000303|PubMed:24838974}; EC=6.2.1.27 {ECO:00…	A0A835IJ86_9MAGN RecName: Full=CobW C-terminal domain-containing protein {ECO:0000259|SMART:SM00833};	Acyl-CoA synthetase	GO:0005777,peroxisome; GO:0106286,(E)-caffeate-CoA ligase activity; GO:0016207,4-coumarate-CoA ligase activity; GO:0018859,4-hydroxybenzoate-CoA ligase activity; GO:0005524,ATP binding; GO:0016405,CoA-ligase activity; GO:0006744,ubiquinone biosynthetic process; GO:0003674,molecular_function; GO:0003824,catalytic activity; GO:0016874,ligase activity; GO:0016877,ligase activity, forming carbon-sulf…	PF00501.31:AMP-binding enzyme
IFM89_023664	K00600 glycine hydroxymethyltransferase [EC:2.1.2.1] | (RefSeq) serine hydroxymethyltransferase 4 (A)	ko00260: Glycine, serine and threonine metabolism; ko00460: Cyanoamino acid metabolism; ko00630: Glyoxylate and dicarboxylate metabolism; ko00670: One carbon pool by folate; ko01100: Metabolic pathways; ko01110: Biosynthesis of secondary metabolites; ko01200: Carbon metabolism; ko01230: Biosynthesis of amino acids; ko01240: Biosynthesis of cofactors	hypothetical protein IFM89_023664 [Coptis chinensis]	GLYC4_ARATH RecName: Full=Serine hydroxymethyltransferase 4 {ECO:0000303|PubMed:10806255}; Short=AtSHMT4 {ECO:0000303|PubMed:31873125}; EC=2.1.2.1 {ECO:0000269|PubMed:31873125}; AltName: Full=Glycine hydroxymethyltransferase 4 {ECO:0000305}; AltName: Full=Serine methylase 4 {ECO:0000305};	A0A835HVX2_9MAGN RecName: Full=Serine hydroxymethyltransferase {ECO:0000256|RuleBase:RU000585}; EC=2.1.2.1 {ECO:0000256|RuleBase:RU000585};	Glycine/serine hydroxymethyltransferase	GO:0005737,cytoplasm; GO:0005829,cytosol; GO:0005886,plasma membrane; GO:0009506,plasmodesma; GO:0004372,glycine hydroxymethyltransferase activity; GO:0030170,pyridoxal phosphate binding; GO:1901149,salicylic acid binding; GO:0070905,serine binding; GO:0008270,zinc ion binding; GO:0007623,circadian rhythm; GO:0046655,folic acid metabolic process; GO:0019264,glycine biosynthetic process from serin…	PF00464.22:Serine hydroxymethyltransferase
IFM89_036508	K08472 mlo protein | (RefSeq) MLO-like protein 11 (A)	--	hypothetical protein IFM89_036508 [Coptis chinensis]	MLO11_ARATH RecName: Full=MLO-like protein 11; Short=AtMlo11;	A0A835I783_9MAGN RecName: Full=MLO-like protein {ECO:0000256|RuleBase:RU280816};	--	GO:0016021,integral component of membrane; GO:0005516,calmodulin binding; GO:0006952,defense response; GO:0009607,response to biotic stimulus; GO:0003674,molecular_function; GO:0005488,binding; GO:0005515,protein binding; GO:0006950,response to stress; GO:0008150,biological_process; GO:0050896,response to stimulus; GO:0005575,cellular_component; GO:0016020,membrane; GO:0031224,intrinsic component…	PF03094.18:Mlo family
IFM89_017821	--	--	hypothetical protein IFM89_017821 [Coptis chinensis]	FTSI3_ARATH RecName: Full=Probable inactive ATP-dependent zinc metalloprotease FTSHI 3, chloroplastic; Short=AtFTSHI3 {ECO:0000303|PubMed:12185496}; AltName: Full=Protein FTSH INACTIVE PROTEASE 3 {ECO:0000303|PubMed:12185496}; Flags: Precursor;	A0A835LMM7_9MAGN RecName: Full=FtsH_ext domain-containing protein {ECO:0000259|Pfam:PF06480};	AAA+-type ATPase containing the peptidase M41 domain	GO:0009941,chloroplast envelope; GO:0031969,chloroplast membrane; GO:0009534,chloroplast thylakoid; GO:0005829,cytosol; GO:0016021,integral component of membrane; GO:0005524,ATP binding; GO:0016887,ATP hydrolysis activity; GO:0004176,ATP-dependent peptidase activity; GO:0004222,metalloendopeptidase activity; GO:0008270,zinc ion binding; GO:0006508,proteolysis; GO:0000166,nucleotide binding; GO:00…	PF06480.18:FtsH Extracellular
IFM89_007681	K22683 aspartyl protease family protein [EC:3.4.23.-] | (RefSeq) protein ASPARTIC PROTEASE IN GUARD CELL 1-like (A)	--	hypothetical protein IFM89_007681 [Coptis chinensis]	ASPG2_ARATH RecName: Full=Protein ASPARTIC PROTEASE IN GUARD CELL 2; Short=AtASPG2; EC=3.4.23.-; Flags: Precursor;	A0A835IYP3_9MAGN RecName: Full=Peptidase A1 domain-containing protein {ECO:0000259|PROSITE:PS51767};	Aspartyl protease	GO:0004190,aspartic-type endopeptidase activity; GO:0003677,DNA binding; GO:0006508,proteolysis; GO:0003674,molecular_function; GO:0003824,catalytic activity; GO:0004175,endopeptidase activity; GO:0008233,peptidase activity; GO:0016787,hydrolase activity; GO:0070001,aspartic-type peptidase activity; GO:0140096,catalytic activity, acting on a protein; GO:0003676,nucleic acid binding; GO:0005488,bi…	PF14543.9:Xylanase inhibitor N-terminal
IFM89_010280	--	--	hypothetical protein IFM89_010280 [Coptis chinensis]	Y5161_ARATH RecName: Full=Uncharacterized protein At5g01610;	A0A835LGS8_9MAGN SubName: Full=Uncharacterized protein {ECO:0000313|EMBL:KAF9591922.1};	--	--	--
IFM89_005743	--	--	hypothetical protein IFM89_005743 [Coptis chinensis]	--	A0A835IL41_9MAGN SubName: Full=Uncharacterized protein {ECO:0000313|EMBL:KAF9619189.1};	--	--	--
IFM89_024126	K11968 ariadne-1 [EC:2.3.2.31] | (RefSeq) probable E3 ubiquitin-protein ligase ARI2 isoform X1 (A)	--	hypothetical protein IFM89_024126 [Coptis chinensis]	HBL2_SOLLC RecName: Full=Non-symbiotic hemoglobin 2; AltName: Full=Hb2; AltName: Full=SOLly GLB2;	A0A835H894_9MAGN RecName: Full=GLOBIN domain-containing protein {ECO:0000259|PROSITE:PS01033};	Globins and related hemoproteins	GO:0020037,heme binding; GO:0046872,metal ion binding; GO:0019825,oxygen binding; GO:0006631,fatty acid metabolic process; GO:0019432,triglyceride biosynthetic process; GO:0003674,molecular_function; GO:0005488,binding; GO:0046906,tetrapyrrole binding; GO:0097159,organic cyclic compound binding; GO:1901363,heterocyclic compound binding; GO:0043167,ion binding; GO:0043169,cation binding; GO:003609…	PF00042.25:Globin
IFM89_001167	--	--	hypothetical protein IFM89_001167 [Coptis chinensis]	PRP4_ARATH RecName: Full=Proline-rich protein 4; Short=AtPRP4; Flags: Precursor;	A0A835M977_9MAGN SubName: Full=Uncharacterized protein {ECO:0000313|EMBL:KAF9618444.1};	--	GO:0005576,extracellular region; GO:0005575,cellular_component; GO:0110165,cellular anatomical entity	PF01190.20:Pollen protein Ole e 1 like
IFM89_008957	K14004 protein transport protein SEC13 | (RefSeq) protein transport protein SEC13 homolog B-like (A)	ko03013: Nucleocytoplasmic transport; ko04141: Protein processing in endoplasmic reticulum	hypothetical protein IFM89_008957 [Coptis chinensis]	SC13B_ARATH RecName: Full=Protein transport protein SEC13 homolog B {ECO:0000305}; AltName: Full=SEC13-like protein B {ECO:0000305};	A0A835I9Y3_9MAGN SubName: Full=Uncharacterized protein {ECO:0000313|EMBL:KAF9613566.1};	Vesicle coat complex COPII, subunit SEC13	GO:0030127,COPII vesicle coat; GO:0005783,endoplasmic reticulum; GO:0005794,Golgi apparatus; GO:0005635,nuclear envelope; GO:0005643,nuclear pore; GO:0031080,nuclear pore outer ring; GO:0005730,nucleolus; GO:0005198,structural molecule activity; GO:0090114,COPII-coated vesicle budding; GO:0051028,mRNA transport; GO:0006606,protein import into nucleus; GO:0003674,molecular_function; GO:0006810,tra…	PF00400.35:WD domain, G-beta repeat
IFM89_000614	K13382 (S)-norcoclaurine synthase [EC:4.2.1.78] | (RefSeq) uncharacterized protein LOC113326100 (A)	ko00950: Isoquinoline alkaloid biosynthesis; ko01100: Metabolic pathways; ko01110: Biosynthesis of secondary metabolites	hypothetical protein IFM89_000614 [Coptis chinensis]	NCS2_COPJA RecName: Full=S-norcoclaurine synthase 2; EC=4.2.1.78 {ECO:0000250|UniProtKB:Q67A25}; AltName: Full=Pathogenesis related protein 10A; Short=CjPR10A; Flags: Precursor;	A0A835LQ64_9MAGN RecName: Full=Bet_v_1 domain-containing protein {ECO:0000259|Pfam:PF00407};	--	GO:0050474,(S)-norcoclaurine synthase activity; GO:0009820,alkaloid metabolic process; GO:0006952,defense response; GO:0003674,molecular_function; GO:0003824,catalytic activity; GO:0016829,lyase activity; GO:0016835,carbon-oxygen lyase activity; GO:0016836,hydro-lyase activity; GO:0006807,nitrogen compound metabolic process; GO:0008150,biological_process; GO:0008152,metabolic process; GO:0071704,…	PF00407.22:Pathogenesis-related protein Bet v 1 family
IFM89_013572	--	--	hypothetical protein IFM89_013572 [Coptis chinensis]	--	A0A835I318_9MAGN SubName: Full=Uncharacterized protein {ECO:0000313|EMBL:KAF9609182.1};	--	GO:0016021,integral component of membrane; GO:0005575,cellular_component; GO:0016020,membrane; GO:0031224,intrinsic component of membrane; GO:0110165,cellular anatomical entity	--
IFM89_018471	K01102 pyruvate dehydrogenase phosphatase [EC:3.1.3.43] | (RefSeq) probable protein phosphatase 2C 38 (A)	--	hypothetical protein IFM89_018471 [Coptis chinensis]	P2C60_ORYSJ RecName: Full=Probable protein phosphatase 2C 60; Short=OsPP2C60; EC=3.1.3.16;	A0A835H449_9MAGN RecName: Full=Protein-serine/threonine phosphatase {ECO:0000256|ARBA:ARBA00013081}; EC=3.1.3.16 {ECO:0000256|ARBA:ARBA00013081};	Protein phosphatase 2C/pyruvate dehydrogenase (lipoamide) phosphatase	GO:0016021,integral component of membrane; GO:0046872,metal ion binding; GO:0017018,myosin phosphatase activity; GO:0004722,protein serine/threonine phosphatase activity; GO:0035970,peptidyl-threonine dephosphorylation; GO:0003674,molecular_function; GO:0005488,binding; GO:0043167,ion binding; GO:0043169,cation binding; GO:0003824,catalytic activity; GO:0004721,phosphoprotein phosphatase activity…	PF00481.24:Protein phosphatase 2C
IFM89_038092	K19882 O-palmitoleoyl-L-serine hydrolase [EC:3.1.1.98] | (RefSeq) pectin acetylesterase 10 (A)	--	hypothetical protein IFM89_038092 [Coptis chinensis]	PAE10_ARATH RecName: Full=Pectin acetylesterase 10 {ECO:0000303|PubMed:25115560}; EC=3.1.1.- {ECO:0000305}; Flags: Precursor;	A0A835LH05_9MAGN RecName: Full=Pectin acetylesterase {ECO:0000256|RuleBase:RU363114}; EC=3.1.1.- {ECO:0000256|RuleBase:RU363114};	Pectin acetylesterase and similar proteins	GO:0005576,extracellular region; GO:0052793,pectin acetylesterase activity; GO:0071555,cell wall organization; GO:0003674,molecular_function; GO:0003824,catalytic activity; GO:0016787,hydrolase activity; GO:0016788,hydrolase activity, acting on ester bonds; GO:0052689,carboxylic ester hydrolase activity; GO:0008150,biological_process; GO:0009987,cellular process; GO:0016043,cellular component org…	PF03283.16:Pectinacetylesterase
IFM89_005239	--	--	hypothetical protein IFM89_005239, partial [Coptis chinensis]	LRP1_ARATH RecName: Full=Protein LATERAL ROOT PRIMORDIUM 1;	A0A835H6V2_9MAGN SubName: Full=Uncharacterized protein {ECO:0000313|EMBL:KAF9591658.1};	--	GO:0005634,nucleus; GO:0003677,DNA binding; GO:0003700,DNA-binding transcription factor activity; GO:0046872,metal ion binding; GO:0042803,protein homodimerization activity; GO:0048653,anther development; GO:0009851,auxin biosynthetic process; GO:0009734,auxin-activated signaling pathway; GO:0009555,pollen development; GO:0045893,positive regulation of DNA-templated transcription; GO:0009733,resp…	PF05142.15:Domain of unknown function (DUF702)
IFM89_028800	K00799 glutathione S-transferase [EC:2.5.1.18] | (RefSeq) glutathione S-transferase F10-like (A)	ko00480: Glutathione metabolism; ko01100: Metabolic pathways	hypothetical protein IFM89_028800 [Coptis chinensis]	GSTF9_ARATH RecName: Full=Glutathione S-transferase F9 {ECO:0000303|PubMed:12090627}; Short=AtGSTF9 {ECO:0000303|PubMed:12090627}; EC=2.5.1.18 {ECO:0000269|PubMed:12090627, ECO:0000269|PubMed:16538523}; AltName: Full=AtGSTF7 {ECO:0000303|PubMed:12090627}; AltName: Full=GST class-phi member 9 {ECO:0000303|PubMed:12090627, ECO:0000303|PubMed:29732642};	A0A835GYJ6_9MAGN RecName: Full=Glutathione transferase {ECO:0000256|ARBA:ARBA00012452}; EC=2.5.1.18 {ECO:0000256|ARBA:ARBA00012452};	Glutathione S-transferase	GO:0048046,apoplast; GO:0009507,chloroplast; GO:0009570,chloroplast stroma; GO:0005737,cytoplasm; GO:0005829,cytosol; GO:0005777,peroxisome; GO:0000325,plant-type vacuole; GO:0005886,plasma membrane; GO:0009506,plasmodesma; GO:0009579,thylakoid; GO:0005507,copper ion binding; GO:0043295,glutathione binding; GO:0004602,glutathione peroxidase activity; GO:0004364,glutathione transferase activity; G…	PF02798.23:Glutathione S-transferase, N-terminal domain
IFM89_034610	K01206 alpha-L-fucosidase [EC:3.2.1.51] | (RefSeq) alpha-L-fucosidase 3 (A)	ko00511: Other glycan degradation	hypothetical protein IFM89_034610 [Coptis chinensis]	GDL53_ARATH RecName: Full=GDSL esterase/lipase At3g26430 {ECO:0000305}; EC=3.1.1.- {ECO:0000269|PubMed:23430565}; AltName: Full=Extracellular lipase At3g26430 {ECO:0000305}; Flags: Precursor;	A0A835LSJ3_9MAGN SubName: Full=Uncharacterized protein {ECO:0000313|EMBL:KAF9603277.1};	--	GO:0005576,extracellular region; GO:0016298,lipase activity; GO:0016042,lipid catabolic process; GO:0003674,molecular_function; GO:0003824,catalytic activity; GO:0016787,hydrolase activity; GO:0016788,hydrolase activity, acting on ester bonds; GO:0006629,lipid metabolic process; GO:0008150,biological_process; GO:0008152,metabolic process; GO:0009056,catabolic process; GO:0044238,primary metabolic…	PF00657.25:GDSL-like Lipase/Acylhydrolase
novel.3994	--	--	--	--	--	--	--	--
IFM89_005829	--	--	hypothetical protein IFM89_005829 [Coptis chinensis]	VQ4_ARATH RecName: Full=VQ motif-containing protein 4 {ECO:0000303|PubMed:22535423}; Short=AtVQ4 {ECO:0000303|PubMed:22535423}; AltName: Full=MPK3/6-targeted VQ-motif-containing protein 1 {ECO:0000303|PubMed:24750137};	A0A835GUJ3_9MAGN RecName: Full=VQ domain-containing protein {ECO:0000259|Pfam:PF05678};	--	GO:0005634,nucleus; GO:0006952,defense response; GO:0051245,negative regulation of cellular defense response; GO:0043433,negative regulation of DNA-binding transcription factor activity; GO:0006950,response to stress; GO:0008150,biological_process; GO:0050896,response to stimulus; GO:0006968,cellular defense response; GO:0010185,regulation of cellular defense response; GO:0031347,regulation of de…	PF05678.17:VQ motif
IFM89_029743	--	--	hypothetical protein IFM89_029743 [Coptis chinensis]	--	A0A835LXL2_9MAGN SubName: Full=Uncharacterized protein {ECO:0000313|EMBL:KAF9611305.1};	--	--	--
IFM89_011353	K16296 serine carboxypeptidase-like clade I [EC:3.4.16.-] | (RefSeq) serine carboxypeptidase-like 15 (A)	--	hypothetical protein IFM89_011353 [Coptis chinensis]	PP451_ARATH RecName: Full=Pentatricopeptide repeat-containing protein At5g67570, chloroplastic; AltName: Full=Protein DELAYED GREENING 1; AltName: Full=Protein EMBRYO DEFECTIVE 1408; Flags: Precursor;	A0A835LQ28_9MAGN SubName: Full=Uncharacterized protein {ECO:0000313|EMBL:KAF9600682.1};	FOG: PPR repeat	GO:0009507,chloroplast; GO:0009658,chloroplast organization; GO:0042793,plastid transcription; GO:0006996,organelle organization; GO:0008150,biological_process; GO:0009657,plastid organization; GO:0009987,cellular process; GO:0016043,cellular component organization; GO:0071840,cellular component organization or biogenesis; GO:0006139,nucleobase-containing compound metabolic process; GO:0006351,DN…	PF13041.9:PPR repeat family
novel.5766	--	--	hypothetical protein FNV43_RR24782 [Rhamnella rubrinervis]	DVL11_ARATH RecName: Full=Small polypeptide DEVIL 11 {ECO:0000303|PubMed:14871303}; AltName: Full=Small polypeptide ROTUNDIFOLIA LIKE 8 {ECO:0000303|PubMed:15125775}; Short=Small polypeptide ROT-FOUR-LIKE 8 {ECO:0000303|PubMed:15125775};	A0A8K0DSY5_9ROSA SubName: Full=Uncharacterized protein {ECO:0000313|EMBL:KAF3433679.1};	--	GO:0016021,integral component of membrane; GO:0005886,plasma membrane; GO:0008285,negative regulation of cell population proliferation; GO:0048367,shoot system development; GO:0008150,biological_process; GO:0008283,cell population proliferation; GO:0009987,cellular process; GO:0042127,regulation of cell population proliferation; GO:0048519,negative regulation of biological process; GO:0048523,neg…	PF08137.15:DVL family
IFM89_002663	K15718 linoleate 9S-lipoxygenase [EC:1.13.11.58] | (RefSeq) probable linoleate 9S-lipoxygenase 5 (A)	ko00591: Linoleic acid metabolism	hypothetical protein IFM89_002663 [Coptis chinensis]	FB60_ARATH RecName: Full=F-box protein At1g55000;	A0A835IJ21_9MAGN RecName: Full=LysM domain-containing protein {ECO:0000259|PROSITE:PS51782};	Predicted peptidoglycan-binding protein, contains LysM domain	GO:0005886,plasma membrane; GO:0016567,protein ubiquitination; GO:0006807,nitrogen compound metabolic process; GO:0008150,biological_process; GO:0008152,metabolic process; GO:0019538,protein metabolic process; GO:0032446,protein modification by small protein conjugation; GO:0036211,protein modification process; GO:0043170,macromolecule metabolic process; GO:0043412,macromolecule modification; GO:…	PF01476.23:LysM domain
IFM89_023006	--	--	hypothetical protein IFM89_023006 [Coptis chinensis]	--	A0A835M1D6_9MAGN SubName: Full=Uncharacterized protein {ECO:0000313|EMBL:KAF9615355.1};	--	--	PF07386.14:Protein of unknown function (DUF1499)
IFM89_007922	K16547 protein NEDD1 | (RefSeq) hypothetical protein (A)	--	hypothetical protein AQUCO_04200058v1 [Aquilegia coerulea]	DHU1_ARATH RecName: Full=Protein DWD HYPERSENSITIVE TO UV-B 1 {ECO:0000303|PubMed:25193399, ECO:0000303|PubMed:28735869};	A0A2G5CP05_AQUCA SubName: Full=Uncharacterized protein {ECO:0000313|EMBL:PIA33042.1};	Protein phosphatase 1, regulatory subunit, and related proteins	GO:0080008,Cul4-RING E3 ubiquitin ligase complex; GO:0005634,nucleus; GO:0071493,cellular response to UV-B; GO:0010224,response to UV-B; GO:0008150,biological_process; GO:0009314,response to radiation; GO:0009411,response to UV; GO:0009416,response to light stimulus; GO:0009628,response to abiotic stimulus; GO:0009987,cellular process; GO:0034644,cellular response to UV; GO:0050896,response to st…	PF00400.35:WD domain, G-beta repeat
IFM89_004908	K03444 MFS transporter, SP family, ERD6-like sugar transporter | (RefSeq) sugar transporter ERD6-like 4 (A)	--	hypothetical protein IFM89_004908 [Coptis chinensis]	ERDL6_ARATH RecName: Full=Sugar transporter ERD6-like 6;	A0A835I0X5_9MAGN SubName: Full=Uncharacterized protein {ECO:0000313|EMBL:KAF9608027.1};	Predicted transporter (major facilitator superfamily)	GO:0005794,Golgi apparatus; GO:0016021,integral component of membrane; GO:0016020,membrane; GO:0005739,mitochondrion; GO:0000325,plant-type vacuole; GO:0009705,plant-type vacuole membrane; GO:0051119,sugar transmembrane transporter activity; GO:0022857,transmembrane transporter activity; GO:0042593,glucose homeostasis; GO:0010030,positive regulation of seed germination; GO:0055085,transmembrane t…	PF00083.27:Sugar (and other) transporter
IFM89_037181	K13201 nucleolysin TIA-1/TIAR | (RefSeq) hypothetical protein (A)	--	hypothetical protein IFM89_037181 [Coptis chinensis]	RBP47_NICPL RecName: Full=Polyadenylate-binding protein RBP47; Short=Poly(A)-binding protein RBP47; AltName: Full=RNA-binding protein 47; Short=NplRBP47;	A0A835LSV7_9MAGN SubName: Full=Uncharacterized protein {ECO:0000313|EMBL:KAF9603637.1};	FOG: RRM domain	GO:0010494,cytoplasmic stress granule; GO:0005634,nucleus; GO:0008143,poly(A) binding; GO:0034605,cellular response to heat; GO:0006397,mRNA processing; GO:0003674,molecular_function; GO:0003676,nucleic acid binding; GO:0003723,RNA binding; GO:0003727,single-stranded RNA binding; GO:0005488,binding; GO:0070717,poly-purine tract binding; GO:0097159,organic cyclic compound binding; GO:1901363,heter…	PF00076.25:RNA recognition motif. (a.k.a. RRM, RBD, or RNP domain)
IFM89_022002	K09286 EREBP-like factor | (RefSeq) ethylene-responsive transcription factor RAP2-4-like (A)	--	hypothetical protein IFM89_022002 [Coptis chinensis]	RAP24_ARATH RecName: Full=Ethylene-responsive transcription factor RAP2-4; AltName: Full=Ethylene-responsive transcription factor ERF059; AltName: Full=Protein RELATED TO APETALA2 4;	A0A835I627_9MAGN RecName: Full=AP2/ERF domain-containing protein {ECO:0000259|PROSITE:PS51032};	--	GO:0005634,nucleus; GO:0003677,DNA binding; GO:0003700,DNA-binding transcription factor activity; GO:0043565,sequence-specific DNA binding; GO:0000976,transcription cis-regulatory region binding; GO:0071472,cellular response to salt stress; GO:0009736,cytokinin-activated signaling pathway; GO:0009873,ethylene-activated signaling pathway; GO:0045595,regulation of cell differentiation; GO:0009409,r…	PF00847.23:AP2 domain
IFM89_006109	K08912 light-harvesting complex II chlorophyll a/b binding protein 1 | (RefSeq) chlorophyll a-b binding protein of LHCII type 1-like (A)	ko00196: Photosynthesis - antenna proteins; ko01100: Metabolic pathways	hypothetical protein IFM89_006109 [Coptis chinensis]	CB2A_SPIOL RecName: Full=Chlorophyll a-b binding protein, chloroplastic; AltName: Full=LHCII type I CAB; Short=LHCP; Flags: Precursor;	A0A835GUL5_9MAGN RecName: Full=Chlorophyll a-b binding protein, chloroplastic {ECO:0000256|RuleBase:RU363080};	--	GO:0009535,chloroplast thylakoid membrane; GO:0016021,integral component of membrane; GO:0009522,photosystem I; GO:0009523,photosystem II; GO:0016168,chlorophyll binding; GO:0046872,metal ion binding; GO:0009765,photosynthesis, light harvesting; GO:0003674,molecular_function; GO:0005488,binding; GO:0046906,tetrapyrrole binding; GO:0097159,organic cyclic compound binding; GO:1901363,heterocyclic c…	PF00504.24:Chlorophyll A-B binding protein
novel.4106	--	--	--	--	--	--	--	--
IFM89_039102	K17609 nucleoredoxin [EC:1.8.1.8] | (RefSeq) probable nucleoredoxin 3 (A)	--	hypothetical protein IFM89_039102 [Coptis chinensis]	NRX3_ARATH RecName: Full=Probable nucleoredoxin 3; Short=AtNrx3; EC=1.8.1.8;	A0A835IJU1_9MAGN SubName: Full=Uncharacterized protein {ECO:0000313|EMBL:KAF9617883.1};	Thioredoxin, nucleoredoxin and related proteins	GO:0004791,thioredoxin-disulfide reductase activity; GO:0003674,molecular_function; GO:0003824,catalytic activity; GO:0015035,protein-disulfide reductase activity; GO:0015036,disulfide oxidoreductase activity; GO:0016209,antioxidant activity; GO:0016491,oxidoreductase activity; GO:0016667,oxidoreductase activity, acting on a sulfur group of donors; GO:0016668,oxidoreductase activity, acting on a …	PF13905.9:Thioredoxin-like
IFM89_016685	K19891 glucan endo-1,3-beta-glucosidase 1/2/3 [EC:3.2.1.39] | (RefSeq) hypothetical protein (A)	ko00500: Starch and sucrose metabolism; ko01100: Metabolic pathways	hypothetical protein IFM89_016685 [Coptis chinensis]	E1313_ARATH RecName: Full=Glucan endo-1,3-beta-glucosidase 13; EC=3.2.1.39; AltName: Full=(1->3)-beta-glucan endohydrolase 13; Short=(1->3)-beta-glucanase 13; AltName: Full=Beta-1,3-endoglucanase 13; Short=Beta-1,3-glucanase 13; Flags: Precursor;	A0A835MEU7_9MAGN RecName: Full=X8 domain-containing protein {ECO:0000259|SMART:SM00768};	--	GO:0031225,anchored component of membrane; GO:0046658,anchored component of plasma membrane; GO:0005576,extracellular region; GO:0005886,plasma membrane; GO:0009536,plastid; GO:0042973,glucan endo-1,3-beta-D-glucosidase activity; GO:0005975,carbohydrate metabolic process; GO:0071555,cell wall organization; GO:0006952,defense response; GO:0003674,molecular_function; GO:0003824,catalytic activity; …	PF07983.16:X8 domain
IFM89_000387	--	--	hypothetical protein IFM89_000387 [Coptis chinensis]	YAB2_ARATH RecName: Full=Putative axial regulator YABBY 2;	A0A835H9Z4_9MAGN SubName: Full=Uncharacterized protein {ECO:0000313|EMBL:KAF9595469.1};	--	GO:0005634,nucleus; GO:0003700,DNA-binding transcription factor activity; GO:0046872,metal ion binding; GO:0000976,transcription cis-regulatory region binding; GO:0010158,abaxial cell fate specification; GO:0045165,cell fate commitment; GO:0003674,molecular_function; GO:0140110,transcription regulator activity; GO:0005488,binding; GO:0043167,ion binding; GO:0043169,cation binding; GO:0001067,tran…	PF04690.16:YABBY protein
IFM89_037985	K22262 WD repeat and FYVE domain-containing protein 3 | (RefSeq) protein SPIRRIG (A)	--	hypothetical protein IFM89_037985 [Coptis chinensis]	PP207_ARATH RecName: Full=Pentatricopeptide repeat-containing protein At3g02330, mitochondrial; AltName: Full=Mitochondrial editing factor 13 {ECO:0000303|PubMed:26048647}; Flags: Precursor;	A0A835I798_9MAGN RecName: Full=DYW_deaminase domain-containing protein {ECO:0000259|Pfam:PF14432};	FOG: PPR repeat	GO:0005739,mitochondrion; GO:0016554,cytidine to uridine editing; GO:0080156,mitochondrial mRNA modification; GO:0006397,mRNA processing; GO:0006139,nucleobase-containing compound metabolic process; GO:0006725,cellular aromatic compound metabolic process; GO:0006807,nitrogen compound metabolic process; GO:0008150,biological_process; GO:0008152,metabolic process; GO:0009451,RNA modification; GO:00…	PF13041.9:PPR repeat family
IFM89_025569	K03405 magnesium chelatase subunit I [EC:6.6.1.1] | (RefSeq) magnesium-chelatase subunit ChlI, chloroplastic (A)	ko00860: Porphyrin metabolism; ko01100: Metabolic pathways; ko01110: Biosynthesis of secondary metabolites	hypothetical protein IFM89_025569, partial [Coptis chinensis]	CHLI_SOYBN RecName: Full=Magnesium-chelatase subunit ChlI, chloroplastic; Short=Mg-chelatase subunit I-1; EC=6.6.1.1; AltName: Full=Mg-protoporphyrin IX chelatase subunit ChlI; Flags: Precursor;	A0A835IU55_9MAGN SubName: Full=Uncharacterized protein {ECO:0000313|EMBL:KAF9621658.1}; Flags: Fragment;	--	GO:0009570,chloroplast stroma; GO:0005524,ATP binding; GO:0016851,magnesium chelatase activity; GO:0015995,chlorophyll biosynthetic process; GO:0015979,photosynthesis; GO:0000166,nucleotide binding; GO:0003674,molecular_function; GO:0005488,binding; GO:0017076,purine nucleotide binding; GO:0030554,adenyl nucleotide binding; GO:0032553,ribonucleotide binding; GO:0032555,purine ribonucleotide bindi…	PF00022.22:Actin
IFM89_000506	K00430 peroxidase [EC:1.11.1.7] | (RefSeq) peroxidase 21 (A)	ko00940: Phenylpropanoid biosynthesis; ko01100: Metabolic pathways; ko01110: Biosynthesis of secondary metabolites	hypothetical protein IFM89_000506, partial [Coptis chinensis]	PER21_ARATH RecName: Full=Peroxidase 21; Short=Atperox P21; EC=1.11.1.7; AltName: Full=ATP2a/ATP2b; AltName: Full=PRXR5; Flags: Precursor;	A0A835H1N8_9MAGN RecName: Full=Peroxidase {ECO:0000256|RuleBase:RU362060}; EC=1.11.1.7 {ECO:0000256|RuleBase:RU362060}; Flags: Fragment;	--	GO:0009505,plant-type cell wall; GO:0020037,heme binding; GO:0046872,metal ion binding; GO:0004601,peroxidase activity; GO:0050832,defense response to fungus; GO:0042744,hydrogen peroxide catabolic process; GO:0006979,response to oxidative stress; GO:0048511,rhythmic process; GO:0003674,molecular_function; GO:0005488,binding; GO:0046906,tetrapyrrole binding; GO:0097159,organic cyclic compound bin…	PF00141.26:Peroxidase
IFM89_015017	K08955 ATP-dependent metalloprotease [EC:3.4.24.-] | (RefSeq) ATP-dependent zinc metalloprotease FTSH 11, chloroplastic/mitochondrial-like (A)	--	hypothetical protein IFM89_015017 [Coptis chinensis]	FTSHB_ARATH RecName: Full=ATP-dependent zinc metalloprotease FTSH 11, chloroplastic/mitochondrial; Short=AtFTSH11; EC=3.4.24.-; Flags: Precursor;	A0A835HML3_9MAGN RecName: Full=AAA domain-containing protein {ECO:0000259|SMART:SM00382};	AAA+-type ATPase containing the peptidase M41 domain	GO:0009507,chloroplast; GO:0009941,chloroplast envelope; GO:0009534,chloroplast thylakoid; GO:0009535,chloroplast thylakoid membrane; GO:0016021,integral component of membrane; GO:0005743,mitochondrial inner membrane; GO:0005739,mitochondrion; GO:0009536,plastid; GO:0005524,ATP binding; GO:0016887,ATP hydrolysis activity; GO:0004176,ATP-dependent peptidase activity; GO:0046872,metal ion binding; …	PF01434.21:Peptidase family M41
IFM89_002800	K13383 (RS)-norcoclaurine 6-O-methyltransferase [EC:2.1.1.128] | (RefSeq) (RS)-norcoclaurine 6-O-methyltransferase-like (A)	ko00950: Isoquinoline alkaloid biosynthesis; ko01100: Metabolic pathways; ko01110: Biosynthesis of secondary metabolites	hypothetical protein IFM89_002800 [Coptis chinensis]	COOMT_COPJA RecName: Full=Columbamine O-methyltransferase; Short=CoOMT; EC=2.1.1.118; AltName: Full=Tetrahydrocolumbamine 2-O-methyltransferase; EC=2.1.1.89;	A0A835HQV5_9MAGN SubName: Full=Uncharacterized protein {ECO:0000313|EMBL:KAF9604125.1};	Hydroxyindole-O-methyltransferase and related SAM-dependent methyltransferases	GO:0030778,columbamine O-methyltransferase activity; GO:0008171,O-methyltransferase activity; GO:0046983,protein dimerization activity; GO:0030762,tetrahydrocolumbamine 2-O-methyltransferase activity; GO:0009820,alkaloid metabolic process; GO:0032259,methylation; GO:0003674,molecular_function; GO:0003824,catalytic activity; GO:0008168,methyltransferase activity; GO:0008757,S-adenosylmethionine-de…	PF00891.21:O-methyltransferase domain
IFM89_012552	K00161 pyruvate dehydrogenase E1 component alpha subunit [EC:1.2.4.1] | (RefSeq) pyruvate dehydrogenase E1 component subunit alpha-3, chloroplastic-like (A)	ko00010: Glycolysis / Gluconeogenesis; ko00020: Citrate cycle (TCA cycle); ko00620: Pyruvate metabolism; ko01100: Metabolic pathways; ko01110: Biosynthesis of secondary metabolites; ko01200: Carbon metabolism	hypothetical protein IFM89_012552, partial [Coptis chinensis]	ODPA3_ARATH RecName: Full=Pyruvate dehydrogenase E1 component subunit alpha-3, chloroplastic; EC=1.2.4.1; Flags: Precursor;	A0A835HML4_9MAGN RecName: Full=Pyruvate dehydrogenase E1 component subunit alpha {ECO:0000256|RuleBase:RU361139}; EC=1.2.4.1 {ECO:0000256|RuleBase:RU361139}; Flags: Fragment;	Pyruvate dehydrogenase E1, alpha subunit	GO:0009507,chloroplast; GO:0009941,chloroplast envelope; GO:0009570,chloroplast stroma; GO:0009536,plastid; GO:0004739,pyruvate dehydrogenase (acetyl-transferring) activity; GO:0006086,acetyl-CoA biosynthetic process from pyruvate; GO:0006096,glycolytic process; GO:0003674,molecular_function; GO:0003824,catalytic activity; GO:0004738,pyruvate dehydrogenase activity; GO:0016491,oxidoreductase acti…	PF00676.23:Dehydrogenase E1 component
IFM89_021790	K19791 iron transport multicopper oxidase | (RefSeq) L-ascorbate oxidase homolog (A)	--	hypothetical protein IFM89_021790 [Coptis chinensis]	ASOL_BRANA RecName: Full=L-ascorbate oxidase homolog; EC=1.10.3.-; Flags: Precursor;	A0A835IPN1_9MAGN SubName: Full=Uncharacterized protein {ECO:0000313|EMBL:KAF9621486.1};	Multicopper oxidases	GO:0005576,extracellular region; GO:0005507,copper ion binding; GO:0016491,oxidoreductase activity; GO:0003674,molecular_function; GO:0005488,binding; GO:0043167,ion binding; GO:0043169,cation binding; GO:0046872,metal ion binding; GO:0046914,transition metal ion binding; GO:0003824,catalytic activity; GO:0005575,cellular_component; GO:0110165,cellular anatomical entity	PF00394.25:Multicopper oxidase
novel.8144	K00021 hydroxymethylglutaryl-CoA reductase (NADPH) [EC:1.1.1.34] | (RefSeq) 3-hydroxy-3-methylglutaryl-coenzyme A reductase 1-like (A)	ko00900: Terpenoid backbone biosynthesis; ko01100: Metabolic pathways; ko01110: Biosynthesis of secondary metabolites	unnamed protein product, partial [Vitis vinifera]	HMDH2_GOSHI RecName: Full=3-hydroxy-3-methylglutaryl-coenzyme A reductase 2; Short=HMG-CoA reductase 2; EC=1.1.1.34;	A0A7J8T1U3_GOSDV RecName: Full=Hydroxymethylglutaryl-CoA reductase (NADPH) {ECO:0000256|ARBA:ARBA00012999}; EC=1.1.1.34 {ECO:0000256|ARBA:ARBA00012999};	3-hydroxy-3-methylglutaryl-CoA (HMG-CoA) reductase	GO:0005789,endoplasmic reticulum membrane; GO:0016021,integral component of membrane; GO:0031966,mitochondrial membrane; GO:0005778,peroxisomal membrane; GO:0042170,plastid membrane; GO:0004420,hydroxymethylglutaryl-CoA reductase (NADPH) activity; GO:0015936,coenzyme A metabolic process; GO:0008299,isoprenoid biosynthetic process; GO:0016126,sterol biosynthetic process; GO:0003674,molecular_funct…	PF00368.21:Hydroxymethylglutaryl-coenzyme A reductase
IFM89_008166	K13379 reversibly glycosylated polypeptide / UDP-arabinopyranose mutase [EC:2.4.1.- 5.4.99.30] | (RefSeq) alpha-1,4-glucan-protein synthase [UDP-forming] 2-like (A)	ko00520: Amino sugar and nucleotide sugar metabolism; ko01100: Metabolic pathways; ko01250: Biosynthesis of nucleotide sugars	hypothetical protein IFM89_008166 [Coptis chinensis]	RGP2_SOLTU RecName: Full=Probable UDP-arabinopyranose mutase 2 {ECO:0000305}; EC=5.4.99.30 {ECO:0000250|UniProtKB:Q8H8T0}; AltName: Full=Reversibly glycosylated polypeptide 2 {ECO:0000303|PubMed:10580281}; Short=RGP2 {ECO:0000303|PubMed:10580281}; AltName: Full=UDP-L-arabinose mutase 2 {ECO:0000305}; AltName: Full=UDP-glucose:protein transglucosylase 2 {ECO:0000303|PubMed:10580281}; Short=UPTG 2 …	A0A835IVY3_9MAGN RecName: Full=UDP-arabinopyranose mutase {ECO:0000256|ARBA:ARBA00012805, ECO:0000256|PIRNR:PIRNR016429}; EC=5.4.99.30 {ECO:0000256|ARBA:ARBA00012805, ECO:0000256|PIRNR:PIRNR016429};	--	GO:0005829,cytosol; GO:0005576,extracellular region; GO:0005794,Golgi apparatus; GO:0009506,plasmodesma; GO:0052691,UDP-arabinopyranose mutase activity; GO:0071555,cell wall organization; GO:0030244,cellulose biosynthetic process; GO:0009832,plant-type cell wall biogenesis; GO:0006486,protein glycosylation; GO:0033356,UDP-L-arabinose metabolic process; GO:0003674,molecular_function; GO:0003824,ca…	PF03214.16:Reversibly glycosylated polypeptide
IFM89_037698	K10406 kinesin family member C2/C3 | (RefSeq) kinesin-like protein KIN-14J (A)	--	hypothetical protein IFM89_037698 [Coptis chinensis]	KN14J_ARATH RecName: Full=Kinesin-like protein KIN-14J {ECO:0000305}; AltName: Full=Kinesin KinG {ECO:0000312|EMBL:ADL28383.1};	A0A835M3D9_9MAGN SubName: Full=Uncharacterized protein {ECO:0000313|EMBL:KAF9617635.1};	Kinesin (KAR3 subfamily)	GO:0005874,microtubule; GO:0015630,microtubule cytoskeleton; GO:0005524,ATP binding; GO:0008017,microtubule binding; GO:0003777,microtubule motor activity; GO:0007018,microtubule-based movement; GO:0007017,microtubule-based process; GO:0000166,nucleotide binding; GO:0003674,molecular_function; GO:0005488,binding; GO:0017076,purine nucleotide binding; GO:0030554,adenyl nucleotide binding; GO:00325…	PF00225.26:Kinesin motor domain
IFM89_017984	K09422 transcription factor MYB, plant | (RefSeq) myb-related protein Myb4 (A)	--	hypothetical protein IFM89_017984 [Coptis chinensis]	MYB30_ORYSJ RecName: Full=Transcription factor MYB30 {ECO:0000305}; Short=OsMYB30 {ECO:0000303|PubMed:18987217};	A0A835HTU9_9MAGN SubName: Full=Uncharacterized protein {ECO:0000313|EMBL:KAF9605641.1};	Transcription factor, Myb superfamily	GO:0005634,nucleus; GO:0003677,DNA binding; GO:0003674,molecular_function; GO:0003676,nucleic acid binding; GO:0005488,binding; GO:0097159,organic cyclic compound binding; GO:1901363,heterocyclic compound binding; GO:0005575,cellular_component; GO:0005622,intracellular anatomical structure; GO:0043226,organelle; GO:0043227,membrane-bounded organelle; GO:0043229,intracellular organelle; GO:0043231…	PF00249.34:Myb-like DNA-binding domain
IFM89_006828	K01179 endoglucanase [EC:3.2.1.4] | (RefSeq) endoglucanase 9-like (A)	ko00500: Starch and sucrose metabolism; ko01100: Metabolic pathways	hypothetical protein IFM89_006828 [Coptis chinensis]	GUN3_ARATH RecName: Full=Endoglucanase 3; EC=3.2.1.4; AltName: Full=Cellulase 5; Short=AtCEL5; AltName: Full=Endo-1,4-beta glucanase 3; Flags: Precursor;	A0A835ICH6_9MAGN RecName: Full=Cellulase {ECO:0000256|ARBA:ARBA00012601}; EC=3.2.1.4 {ECO:0000256|ARBA:ARBA00012601};	--	GO:0005576,extracellular region; GO:0005794,Golgi apparatus; GO:0009505,plant-type cell wall; GO:0008810,cellulase activity; GO:0071555,cell wall organization; GO:0030245,cellulose catabolic process; GO:0003674,molecular_function; GO:0003824,catalytic activity; GO:0004553,hydrolase activity, hydrolyzing O-glycosyl compounds; GO:0016787,hydrolase activity; GO:0016798,hydrolase activity, acting on …	PF00759.22:Glycosyl hydrolase family 9
novel.5081	--	--	hypothetical protein IFM89_017630 [Coptis chinensis]	--	A0A835GXZ6_9MAGN SubName: Full=Uncharacterized protein {ECO:0000313|EMBL:KAF9588951.1};	--	GO:0004252,serine-type endopeptidase activity; GO:0006508,proteolysis; GO:0003674,molecular_function; GO:0003824,catalytic activity; GO:0004175,endopeptidase activity; GO:0008233,peptidase activity; GO:0008236,serine-type peptidase activity; GO:0016787,hydrolase activity; GO:0017171,serine hydrolase activity; GO:0140096,catalytic activity, acting on a protein; GO:0006807,nitrogen compound metabol…	--
IFM89_018724	--	--	hypothetical protein IFM89_018724 [Coptis chinensis]	YAB4_ORYSI RecName: Full=Protein YABBY 4; AltName: Full=OsYAB7; AltName: Full=OsYABBY4;	A0A835ID24_9MAGN SubName: Full=Uncharacterized protein {ECO:0000313|EMBL:KAF9614477.1};	--	GO:0005634,nucleus; GO:0046872,metal ion binding; GO:0032502,developmental process; GO:0003674,molecular_function; GO:0005488,binding; GO:0043167,ion binding; GO:0043169,cation binding; GO:0008150,biological_process; GO:0005575,cellular_component; GO:0005622,intracellular anatomical structure; GO:0043226,organelle; GO:0043227,membrane-bounded organelle; GO:0043229,intracellular organelle; GO:0043…	PF04690.16:YABBY protein
IFM89_007623	K13383 (RS)-norcoclaurine 6-O-methyltransferase [EC:2.1.1.128] | (RefSeq) (RS)-norcoclaurine 6-O-methyltransferase-like (A)	ko00950: Isoquinoline alkaloid biosynthesis; ko01100: Metabolic pathways; ko01110: Biosynthesis of secondary metabolites	hypothetical protein IFM89_007623 [Coptis chinensis]	COOMT_COPJA RecName: Full=Columbamine O-methyltransferase; Short=CoOMT; EC=2.1.1.118; AltName: Full=Tetrahydrocolumbamine 2-O-methyltransferase; EC=2.1.1.89;	A0A835HU71_9MAGN SubName: Full=Uncharacterized protein {ECO:0000313|EMBL:KAF9604502.1};	Hydroxyindole-O-methyltransferase and related SAM-dependent methyltransferases	GO:0030778,columbamine O-methyltransferase activity; GO:0008171,O-methyltransferase activity; GO:0046983,protein dimerization activity; GO:0030762,tetrahydrocolumbamine 2-O-methyltransferase activity; GO:0009820,alkaloid metabolic process; GO:0032259,methylation; GO:0003674,molecular_function; GO:0003824,catalytic activity; GO:0008168,methyltransferase activity; GO:0008757,S-adenosylmethionine-de…	PF00891.21:O-methyltransferase domain
novel.5628	--	--	hypothetical protein IFM89_013028 [Coptis chinensis]	--	A0A835LE69_9MAGN RecName: Full=Syntaxin-6_N domain-containing protein {ECO:0000259|Pfam:PF09177};	--	GO:0016021,integral component of membrane; GO:0048193,Golgi vesicle transport; GO:0015031,protein transport; GO:0006810,transport; GO:0008150,biological_process; GO:0016192,vesicle-mediated transport; GO:0051179,localization; GO:0051234,establishment of localization; GO:0008104,protein localization; GO:0009987,cellular process; GO:0033036,macromolecule localization; GO:0045184,establishment of pr…	PF09177.14:Syntaxin 6, N-terminal
IFM89_002155	K15121 solute carrier family 25, member 44 | (RefSeq) solute carrier family 25 member 44-like (A)	--	hypothetical protein IFM89_002155 [Coptis chinensis]	SAMC2_ARATH RecName: Full=Probable S-adenosylmethionine carrier 2, chloroplastic; Flags: Precursor;	A0A835I909_9MAGN SubName: Full=Uncharacterized protein {ECO:0000313|EMBL:KAF9612559.1};	Predicted mitochondrial carrier protein	GO:0031969,chloroplast membrane; GO:0016021,integral component of membrane; GO:0005743,mitochondrial inner membrane; GO:0000095,S-adenosyl-L-methionine transmembrane transporter activity; GO:0003674,molecular_function; GO:0005215,transporter activity; GO:0008324,cation transmembrane transporter activity; GO:0015075,ion transmembrane transporter activity; GO:0015101,organic cation transmembrane tr…	PF00153.30:Mitochondrial carrier protein
IFM89_011673	K19037 E3 ubiquitin-protein ligase ATL23 [EC:2.3.2.27] | (RefSeq) E3 ubiquitin-protein ligase ATL23-like (A)	--	hypothetical protein IFM89_011673 [Coptis chinensis]	DR102_ARATH RecName: Full=DNA damage-repair/toleration protein DRT102;	A0A835HSC2_9MAGN RecName: Full=Cupin_2 domain-containing protein {ECO:0000259|Pfam:PF07883};	--	GO:0005737,cytoplasm; GO:0005829,cytosol; GO:0005634,nucleus; GO:0016853,isomerase activity; GO:0005975,carbohydrate metabolic process; GO:0006281,DNA repair; GO:0003674,molecular_function; GO:0003824,catalytic activity; GO:0008150,biological_process; GO:0008152,metabolic process; GO:0044238,primary metabolic process; GO:0071704,organic substance metabolic process; GO:0006139,nucleobase-containin…	PF02502.21:Ribose/Galactose Isomerase
IFM89_038631	K00422 polyphenol oxidase [EC:1.10.3.1] | (RefSeq) aureusidin synthase-like (A)	ko00350: Tyrosine metabolism; ko00950: Isoquinoline alkaloid biosynthesis; ko01100: Metabolic pathways; ko01110: Biosynthesis of secondary metabolites	hypothetical protein IFM89_038631 [Coptis chinensis]	AS1_ANTMA RecName: Full=Aureusidin synthase; Short=AmAS1; EC=1.21.3.6 {ECO:0000269|PubMed:11073455, ECO:0000269|PubMed:11418122};	A0A835I7W5_9MAGN RecName: Full=Tyrosinase_Cu-bd domain-containing protein {ECO:0000259|PROSITE:PS00498};	--	GO:0005775,vacuolar lumen; GO:0033793,aureusidin synthase activity; GO:0102706,butein:oxygen oxidoreductase activity; GO:0004097,catechol oxidase activity; GO:0005507,copper ion binding; GO:0102791,sulfuretin synthase activity; GO:0046148,pigment biosynthetic process; GO:0003674,molecular_function; GO:0003824,catalytic activity; GO:0016491,oxidoreductase activity; GO:0046992,oxidoreductase activi…	PF12143.11:Protein of unknown function (DUF_B2219)
IFM89_016403	K10781 fatty acyl-ACP thioesterase B [EC:3.1.2.14 3.1.2.21] | (RefSeq) uncharacterized protein LOC113347984 isoform X1 (A)	ko00061: Fatty acid biosynthesis; ko01100: Metabolic pathways; ko01212: Fatty acid metabolism	hypothetical protein IFM89_016403 [Coptis chinensis]	ML423_ARATH RecName: Full=MLP-like protein 423;	A0A835LLV2_9MAGN RecName: Full=Bet_v_1 domain-containing protein {ECO:0000259|SMART:SM01037};	--	GO:0005829,cytosol; GO:0005634,nucleus; GO:0010427,abscisic acid binding; GO:0004864,protein phosphatase inhibitor activity; GO:0038023,signaling receptor activity; GO:0009738,abscisic acid-activated signaling pathway; GO:0006952,defense response; GO:0003674,molecular_function; GO:0005488,binding; GO:0008289,lipid binding; GO:0019840,isoprenoid binding; GO:0031406,carboxylic acid binding; GO:0033…	PF00407.22:Pathogenesis-related protein Bet v 1 family
IFM89_005286	K23095 demethylphylloquinol methyltransferase [EC:2.1.1.329] | (RefSeq) 2-phytyl-1,4-beta-naphthoquinone methyltransferase, chloroplastic-like (A)	ko00130: Ubiquinone and other terpenoid-quinone biosynthesis; ko01100: Metabolic pathways; ko01110: Biosynthesis of secondary metabolites; ko01240: Biosynthesis of cofactors	hypothetical protein IFM89_005286 [Coptis chinensis]	Y1814_ARATH RecName: Full=Uncharacterized methyltransferase At1g78140, chloroplastic; EC=2.1.1.-; Flags: Precursor;	A0A835IUA1_9MAGN RecName: Full=Methyltransf_11 domain-containing protein {ECO:0000259|Pfam:PF08241};	--	GO:0009507,chloroplast; GO:0005739,mitochondrion; GO:0010287,plastoglobule; GO:0008168,methyltransferase activity; GO:0032259,methylation; GO:0006744,ubiquinone biosynthetic process; GO:0003674,molecular_function; GO:0003824,catalytic activity; GO:0016740,transferase activity; GO:0016741,transferase activity, transferring one-carbon groups; GO:0008150,biological_process; GO:0008152,metabolic proc…	PF08241.15:Methyltransferase domain
IFM89_033908	K15382 solute carrier family 50 (sugar transporter) | (RefSeq) bidirectional sugar transporter SWEET14 (A)	--	hypothetical protein IFM89_033908 [Coptis chinensis]	SWT15_VITVI RecName: Full=Bidirectional sugar transporter SWEET15 {ECO:0000305}; Short=VvSWEET15 {ECO:0000305};	A0A835HWB3_9MAGN RecName: Full=Bidirectional sugar transporter SWEET {ECO:0000256|RuleBase:RU910715};	Multitransmembrane protein	GO:0000139,Golgi membrane; GO:0016021,integral component of membrane; GO:0005887,integral component of plasma membrane; GO:0008515,sucrose transmembrane transporter activity; GO:0051119,sugar transmembrane transporter activity; GO:0008643,carbohydrate transport; GO:0071215,cellular response to abscisic acid stimulus; GO:0071470,cellular response to osmotic stress; GO:0071446,cellular response to …	PF03083.19:Sugar efflux transporter for intercellular exchange
IFM89_002001	K09838 zeaxanthin epoxidase [EC:1.14.15.21] | (RefSeq) zeaxanthin epoxidase, chloroplastic (A)	ko00906: Carotenoid biosynthesis; ko01100: Metabolic pathways; ko01110: Biosynthesis of secondary metabolites	hypothetical protein IFM89_002001 [Coptis chinensis]	ABA2_PRUAR RecName: Full=Zeaxanthin epoxidase, chloroplastic; EC=1.14.15.21; AltName: Full=PA-ZE; Flags: Precursor;	A0A835LUH2_9MAGN RecName: Full=Zeaxanthin epoxidase, chloroplastic {ECO:0000256|ARBA:ARBA00015103, ECO:0000256|PIRNR:PIRNR036989}; EC=1.14.15.21 {ECO:0000256|ARBA:ARBA00012097, ECO:0000256|PIRNR:PIRNR036989};	Kynurenine 3-monooxygenase and related flavoprotein monooxygenases	GO:0009507,chloroplast; GO:0016020,membrane; GO:0071949,FAD binding; GO:0052662,zeaxanthin epoxidase activity; GO:0009688,abscisic acid biosynthetic process; GO:0000166,nucleotide binding; GO:0003674,molecular_function; GO:0005488,binding; GO:0036094,small molecule binding; GO:0043167,ion binding; GO:0043168,anion binding; GO:0050660,flavin adenine dinucleotide binding; GO:0097159,organic cyclic …	PF01494.22:FAD binding domain
IFM89_015237	K12449 UDP-apiose/xylose synthase | (RefSeq) UDP-D-apiose/UDP-D-xylose synthase 2 (A)	ko00520: Amino sugar and nucleotide sugar metabolism; ko01100: Metabolic pathways; ko01250: Biosynthesis of nucleotide sugars	hypothetical protein IFM89_015237, partial [Coptis chinensis]	AXS2_ARATH RecName: Full=UDP-D-apiose/UDP-D-xylose synthase 2;	A0A835HBW0_9MAGN RecName: Full=Epimerase domain-containing protein {ECO:0000259|Pfam:PF01370}; Flags: Fragment;	dTDP-glucose 4-6-dehydratase/UDP-glucuronic acid decarboxylase	GO:0048046,apoplast; GO:0005737,cytoplasm; GO:0005829,cytosol; GO:0005576,extracellular region; GO:0016831,carboxy-lyase activity; GO:0071555,cell wall organization; GO:0003674,molecular_function; GO:0003824,catalytic activity; GO:0016829,lyase activity; GO:0016830,carbon-carbon lyase activity; GO:0008150,biological_process; GO:0009987,cellular process; GO:0016043,cellular component organization;…	PF01370.24:NAD dependent epimerase/dehydratase family
novel.6860	K01410 mitochondrial intermediate peptidase [EC:3.4.24.59] | (RefSeq) probable mitochondrial intermediate peptidase, mitochondrial (A)	--	hypothetical protein IFM89_035014 [Coptis chinensis]	FB111_ARATH RecName: Full=F-box protein At2g17690; AltName: Full=Protein SUPPRESSOR OF DRM1 DRM2 CMT3 {ECO:0000305};	A0A835HPY2_9MAGN SubName: Full=Uncharacterized protein {ECO:0000313|EMBL:KAF9603344.1};	--	GO:0009408,response to heat; GO:0006950,response to stress; GO:0008150,biological_process; GO:0009266,response to temperature stimulus; GO:0009628,response to abiotic stimulus; GO:0050896,response to stimulus	--
IFM89_006728	K04563 cyclin-dependent kinase [EC:2.7.11.22] | (RefSeq) cyclin-dependent kinase G-2-like (A)	--	hypothetical protein IFM89_006728 [Coptis chinensis]	--	A0A835HTC6_9MAGN SubName: Full=Uncharacterized protein {ECO:0000313|EMBL:KAF9604446.1};	--	--	PF05542.14:Protein of unknown function (DUF760)
IFM89_001289	--	--	hypothetical protein IFM89_001289 [Coptis chinensis]	--	A0A835ITZ7_9MAGN SubName: Full=Uncharacterized protein {ECO:0000313|EMBL:KAF9623369.1};	Junctional membrane complex protein Junctophilin and related MORN repeat proteins	GO:0016021,integral component of membrane; GO:0005575,cellular_component; GO:0016020,membrane; GO:0031224,intrinsic component of membrane; GO:0110165,cellular anatomical entity	PF02493.23:MORN repeat
IFM89_017655	--	--	hypothetical protein IFM89_017655 [Coptis chinensis]	--	A0A835GWR4_9MAGN SubName: Full=Uncharacterized protein {ECO:0000313|EMBL:KAF9588976.1};	Auxilin-like protein and related proteins containing DnaJ domain	--	--
IFM89_037118	K02865 large subunit ribosomal protein L10Ae | (RefSeq) 60S ribosomal protein L10a (A)	ko03010: Ribosome	hypothetical protein IFM89_037118 [Coptis chinensis]	R10A_ORYSI RecName: Full=60S ribosomal protein L10a {ECO:0000250|UniProtKB:B7F845};	A0A835LCS4_9MAGN RecName: Full=Ribosomal protein {ECO:0000256|RuleBase:RU000659};	60S ribosomal protein L10A	GO:0015934,large ribosomal subunit; GO:0003723,RNA binding; GO:0003735,structural constituent of ribosome; GO:0006412,translation; GO:0003674,molecular_function; GO:0003676,nucleic acid binding; GO:0005488,binding; GO:0097159,organic cyclic compound binding; GO:1901363,heterocyclic compound binding; GO:0005198,structural molecule activity; GO:0006518,peptide metabolic process; GO:0006807,nitrogen…	PF00687.24:Ribosomal protein L1p/L10e family
IFM89_019192	K20617 cytochrome P450 family 71 subfamily A | (RefSeq) cytochrome P450 71A1-like (A)	--	hypothetical protein IFM89_019192 [Coptis chinensis]	C71A1_PERAE RecName: Full=Cytochrome P450 71A1; EC=1.14.-.-; AltName: Full=ARP-2; AltName: Full=CYPLXXIA1;	A0A835M5E5_9MAGN SubName: Full=Uncharacterized protein {ECO:0000313|EMBL:KAF9614529.1};	Cytochrome P450 CYP2 subfamily	GO:0005789,endoplasmic reticulum membrane; GO:0016021,integral component of membrane; GO:0020037,heme binding; GO:0005506,iron ion binding; GO:0004497,monooxygenase activity; GO:0016705,oxidoreductase activity, acting on paired donors, with incorporation or reduction of molecular oxygen; GO:0009835,fruit ripening; GO:0003674,molecular_function; GO:0005488,binding; GO:0046906,tetrapyrrole binding;…	PF00067.25:Cytochrome P450
IFM89_028155	K02433 aspartyl-tRNA(Asn)/glutamyl-tRNA(Gln) amidotransferase subunit A [EC:6.3.5.6 6.3.5.7] | (RefSeq) Glutamyl-tRNA(Gln) amidotransferase subunit A (A)	ko00970: Aminoacyl-tRNA biosynthesis; ko01100: Metabolic pathways	hypothetical protein IFM89_028155 [Coptis chinensis]	SFH9_ARATH RecName: Full=Phosphatidylinositol/phosphatidylcholine transfer protein SFH9; AltName: Full=Protein SEC FOURTEEN HOMOLOGS 9; Short=AtSFH9;	A0A835HX24_9MAGN RecName: Full=CRAL-TRIO domain-containing protein {ECO:0000259|PROSITE:PS50191};	Phosphatidylinositol transfer protein SEC14 and related proteins	GO:0000139,Golgi membrane; GO:0005886,plasma membrane; GO:0015031,protein transport; GO:0006810,transport; GO:0008104,protein localization; GO:0008150,biological_process; GO:0009987,cellular process; GO:0033036,macromolecule localization; GO:0045184,establishment of protein localization; GO:0051179,localization; GO:0051234,establishment of localization; GO:0051641,cellular localization; GO:007072…	PF00650.23:CRAL/TRIO domain
IFM89_001628	K01051 pectinesterase [EC:3.1.1.11] | (RefSeq) pectinesterase-like (A)	ko00040: Pentose and glucuronate interconversions; ko01100: Metabolic pathways	hypothetical protein IFM89_001628 [Coptis chinensis]	PME51_ARATH RecName: Full=Probable pectinesterase/pectinesterase inhibitor 51; Includes: RecName: Full=Pectinesterase inhibitor 51; AltName: Full=Pectin methylesterase inhibitor 51; Includes: RecName: Full=Pectinesterase 51; Short=PE 51; EC=3.1.1.11; AltName: Full=Pectin methylesterase 51; Short=AtPME51; Flags: Precursor;	A0A835HJX8_9MAGN RecName: Full=PMEI domain-containing protein {ECO:0000259|SMART:SM00856};	--	GO:0005576,extracellular region; GO:0045330,aspartyl esterase activity; GO:0030599,pectinesterase activity; GO:0046910,pectinesterase inhibitor activity; GO:0042545,cell wall modification; GO:0045490,pectin catabolic process; GO:0003674,molecular_function; GO:0003824,catalytic activity; GO:0016787,hydrolase activity; GO:0016788,hydrolase activity, acting on ester bonds; GO:0052689,carboxylic este…	PF01095.22:Pectinesterase
IFM89_026409	--	--	hypothetical protein IFM89_026409 [Coptis chinensis]	OPT7_ARATH RecName: Full=Oligopeptide transporter 7; Short=AtOPT7;	A0A835HQ50_9MAGN SubName: Full=Uncharacterized protein {ECO:0000313|EMBL:KAF9602292.1};	Sexual differentiation process protein ISP4	GO:0005887,integral component of plasma membrane; GO:0016020,membrane; GO:0035673,oligopeptide transmembrane transporter activity; GO:0015031,protein transport; GO:0003674,molecular_function; GO:0005215,transporter activity; GO:0022857,transmembrane transporter activity; GO:0042887,amide transmembrane transporter activity; GO:1904680,peptide transmembrane transporter activity; GO:0006810,transpor…	PF03169.18:OPT oligopeptide transporter protein
IFM89_012802	K19784 chromate reductase, NAD(P)H dehydrogenase (quinone) | (RefSeq) NADPH:quinone oxidoreductase-like (A)	--	hypothetical protein IFM89_012802 [Coptis chinensis]	NQR_ARATH RecName: Full=NADPH:quinone oxidoreductase; EC=1.6.5.2;	A0A835LM06_9MAGN RecName: Full=NAD(P)H dehydrogenase (quinone) {ECO:0000256|ARBA:ARBA00012648}; EC=1.6.5.2 {ECO:0000256|ARBA:ARBA00012648};	Predicted flavoprotein	GO:0009507,chloroplast; GO:0009570,chloroplast stroma; GO:0005829,cytosol; GO:0005886,plasma membrane; GO:0010181,FMN binding; GO:0050136,NADH dehydrogenase (quinone) activity; GO:0008753,NADPH dehydrogenase (quinone) activity; GO:0000166,nucleotide binding; GO:0003674,molecular_function; GO:0005488,binding; GO:0032553,ribonucleotide binding; GO:0036094,small molecule binding; GO:0043167,ion bind…	PF03358.18:NADPH-dependent FMN reductase
IFM89_030679	--	--	hypothetical protein IFM89_030679 [Coptis chinensis]	RITF1_ARATH RecName: Full=Protein RGF1 INDUCIBLE TRANSCRIPTION FACTOR 1 {ECO:0000303|PubMed:31801996};	A0A835IYF3_9MAGN SubName: Full=Uncharacterized protein {ECO:0000313|EMBL:KAF9626014.1};	--	GO:0005634,nucleus; GO:0046872,metal ion binding; GO:0010078,maintenance of root meristem identity; GO:2000377,regulation of reactive oxygen species metabolic process; GO:2000280,regulation of root development; GO:0043434,response to peptide hormone; GO:0003674,molecular_function; GO:0005488,binding; GO:0043167,ion binding; GO:0043169,cation binding; GO:0007275,multicellular organism development;…	PF04640.17:PLATZ transcription factor
IFM89_009200	K09286 EREBP-like factor | (RefSeq) ethylene-responsive transcription factor 2-like (A)	--	hypothetical protein IFM89_009200 [Coptis chinensis]	EF100_ARATH RecName: Full=Ethylene-responsive transcription factor 1A; Short=AtERF1A; AltName: Full=Ethylene-responsive element-binding factor 1A; Short=EREBP-1A;	A0A835MC81_9MAGN RecName: Full=AP2/ERF domain-containing protein {ECO:0000259|PROSITE:PS51032};	--	GO:0005634,nucleus; GO:0003700,DNA-binding transcription factor activity; GO:0000976,transcription cis-regulatory region binding; GO:0051301,cell division; GO:0006952,defense response; GO:0009873,ethylene-activated signaling pathway; GO:0010087,phloem or xylem histogenesis; GO:0009624,response to nematode; GO:0003674,molecular_function; GO:0140110,transcription regulator activity; GO:0001067,tran…	PF00847.23:AP2 domain
IFM89_005737	K03860 phosphatidylinositol N-acetylglucosaminyltransferase subunit Q | (RefSeq) N-acetylglucosaminyl-phosphatidylinositol biosynthetic protein gpi1-like (A)	ko00563: Glycosylphosphatidylinositol (GPI)-anchor biosynthesis; ko01100: Metabolic pathways	hypothetical protein IFM89_005737 [Coptis chinensis]	SNAK2_SOLTU RecName: Full=Snakin-2; Flags: Precursor;	A0A835IP77_9MAGN SubName: Full=Uncharacterized protein {ECO:0000313|EMBL:KAF9619183.1};	--	GO:0005576,extracellular region; GO:0006952,defense response; GO:0006950,response to stress; GO:0008150,biological_process; GO:0050896,response to stimulus; GO:0005575,cellular_component; GO:0110165,cellular anatomical entity	PF02704.17:Gibberellin regulated protein
IFM89_023483	K16297 serine carboxypeptidase-like clade II [EC:3.4.16.-] | (RefSeq) LOW QUALITY PROTEIN: serine carboxypeptidase-like 27 (A)	--	hypothetical protein IFM89_023483 [Coptis chinensis]	TET8_ARATH RecName: Full=Tetraspanin-8;	A0A835I7V0_9MAGN SubName: Full=Uncharacterized protein {ECO:0000313|EMBL:KAF9613170.1};	--	GO:0005794,Golgi apparatus; GO:0016021,integral component of membrane; GO:0005886,plasma membrane; GO:0009506,plasmodesma; GO:0005773,vacuole; GO:0009734,auxin-activated signaling pathway; GO:0050829,defense response to Gram-negative bacterium; GO:0007154,cell communication; GO:0007165,signal transduction; GO:0008150,biological_process; GO:0009719,response to endogenous stimulus; GO:0009725,respo…	PF00335.23:Tetraspanin family
IFM89_021631	--	--	hypothetical protein IFM89_021631 [Coptis chinensis]	--	A0A835IBN7_9MAGN SubName: Full=Uncharacterized protein {ECO:0000313|EMBL:KAF9615060.1};	--	--	--
novel.4057	--	--	hypothetical protein IFM89_006228 [Coptis chinensis]	--	A0A835HCS0_9MAGN RecName: Full=GTP_EFTU_D2 domain-containing protein {ECO:0000259|Pfam:PF03144};	--	GO:0016021,integral component of membrane; GO:0005525,GTP binding; GO:0000166,nucleotide binding; GO:0003674,molecular_function; GO:0005488,binding; GO:0017076,purine nucleotide binding; GO:0019001,guanyl nucleotide binding; GO:0032553,ribonucleotide binding; GO:0032555,purine ribonucleotide binding; GO:0032561,guanyl ribonucleotide binding; GO:0035639,purine ribonucleoside triphosphate binding; …	--
IFM89_016204	--	--	hypothetical protein IFM89_016204 [Coptis chinensis]	SMR6_ARATH RecName: Full=Cyclin-dependent protein kinase inhibitor SMR6 {ECO:0000303|PubMed:20706207, ECO:0000303|PubMed:24399300, ECO:0000303|PubMed:26546445}; AltName: Full=Protein SIAMESE-RELATED 6 {ECO:0000303|PubMed:20706207, ECO:0000303|PubMed:24399300, ECO:0000303|PubMed:26546445};	A0A835MIH4_9MAGN SubName: Full=Uncharacterized protein {ECO:0000313|EMBL:KAF9624956.1};	--	GO:0005634,nucleus; GO:0004860,protein kinase inhibitor activity; GO:0007049,cell cycle; GO:0045839,negative regulation of mitotic nuclear division; GO:0032875,regulation of DNA endoreduplication; GO:0003674,molecular_function; GO:0004857,enzyme inhibitor activity; GO:0019207,kinase regulator activity; GO:0019210,kinase inhibitor activity; GO:0019887,protein kinase regulator activity; GO:0030234,…	--
novel.6141	K22138 mitochondrial pyruvate carrier 1 | (RefSeq) mitochondrial pyruvate carrier 1 isoform X1 (A)	--	mitochondrial pyruvate carrier 1 isoform X1 [Phoenix dactylifera]	MPC1_ARATH RecName: Full=Mitochondrial pyruvate carrier 1 {ECO:0000305}; Short=AtMPC1 {ECO:0000305};	A0A7N0SXC0_KALFE RecName: Full=Mitochondrial pyruvate carrier {ECO:0000256|RuleBase:RU363100};	Uncharacterized conserved protein	GO:0031305,integral component of mitochondrial inner membrane; GO:0005739,mitochondrion; GO:0000325,plant-type vacuole; GO:0005886,plasma membrane; GO:0009536,plastid; GO:0050833,pyruvate transmembrane transporter activity; GO:0006850,mitochondrial pyruvate transmembrane transport; GO:0010119,regulation of stomatal movement; GO:0003674,molecular_function; GO:0005215,transporter activity; GO:00053…	PF03650.16:Mitochondrial pyruvate carriers
IFM89_004670	K01188 beta-glucosidase [EC:3.2.1.21] | (RefSeq) beta-glucosidase 12-like (A)	ko00460: Cyanoamino acid metabolism; ko00500: Starch and sucrose metabolism; ko00999: Biosynthesis of various plant secondary metabolites; ko01100: Metabolic pathways; ko01110: Biosynthesis of secondary metabolites	hypothetical protein IFM89_004670 [Coptis chinensis]	BGL12_ORYSI RecName: Full=Beta-glucosidase 12 {ECO:0000305}; EC=3.2.1.21 {ECO:0000305}; Flags: Precursor;	A0A835M1J1_9MAGN SubName: Full=Uncharacterized protein {ECO:0000313|EMBL:KAF9612967.1};	Beta-glucosidase, lactase phlorizinhydrolase, and related proteins	GO:0005576,extracellular region; GO:0033907,beta-D-fucosidase activity; GO:0004565,beta-galactosidase activity; GO:0008422,beta-glucosidase activity; GO:0102483,scopolin beta-glucosidase activity; GO:0005975,carbohydrate metabolic process; GO:0003674,molecular_function; GO:0003824,catalytic activity; GO:0004553,hydrolase activity, hydrolyzing O-glycosyl compounds; GO:0016787,hydrolase activity; G…	PF00232.21:Glycosyl hydrolase family 1
IFM89_023154	K16055 trehalose 6-phosphate synthase/phosphatase [EC:2.4.1.15 3.1.3.12] | (RefSeq) probable alpha,alpha-trehalose-phosphate synthase [UDP-forming] 7 (A)	ko00500: Starch and sucrose metabolism; ko01100: Metabolic pathways; ko01110: Biosynthesis of secondary metabolites	hypothetical protein IFM89_023154 [Coptis chinensis]	TPS7_ARATH RecName: Full=Probable alpha,alpha-trehalose-phosphate synthase [UDP-forming] 7; EC=2.4.1.15; AltName: Full=Trehalose-6-phosphate synthase 7; Short=AtTPS7;	A0A835M703_9MAGN SubName: Full=Uncharacterized protein {ECO:0000313|EMBL:KAF9621580.1};	Trehalose-6-phosphate synthase component TPS1 and related subunits	GO:0016757,glycosyltransferase activity; GO:0005992,trehalose biosynthetic process; GO:0070413,trehalose metabolism in response to stress; GO:0003674,molecular_function; GO:0003824,catalytic activity; GO:0016740,transferase activity; GO:0005975,carbohydrate metabolic process; GO:0005984,disaccharide metabolic process; GO:0005991,trehalose metabolic process; GO:0008150,biological_process; GO:00081…	PF00982.24:Glycosyltransferase family 20
IFM89_025120	--	--	hypothetical protein IFM89_025120 [Coptis chinensis]	--	A0A835M0P6_9MAGN SubName: Full=Uncharacterized protein {ECO:0000313|EMBL:KAF9606431.1};	--	--	--
novel.6356	--	--	--	--	--	--	--	--
IFM89_002891	K18422 helicase MOV-10 [EC:3.6.4.13] | (RefSeq) probable RNA helicase SDE3 (A)	--	hypothetical protein IFM89_002891 [Coptis chinensis]	SDE3_ARATH RecName: Full=Probable RNA helicase SDE3; EC=3.6.4.13; AltName: Full=Silencing defective protein 3;	A0A835MCN7_9MAGN SubName: Full=Uncharacterized protein {ECO:0000313|EMBL:KAF9618896.1};	RNA helicase	GO:0005829,cytosol; GO:0043186,P granule; GO:0005524,ATP binding; GO:0016887,ATP hydrolysis activity; GO:0003723,RNA binding; GO:0003724,RNA helicase activity; GO:0035194,post-transcriptional gene silencing by RNA; GO:0009616,RNAi-mediated antiviral immune response; GO:0000166,nucleotide binding; GO:0003674,molecular_function; GO:0005488,binding; GO:0017076,purine nucleotide binding; GO:0030554,a…	--
novel.7931	--	--	transmembrane protein [Thalictrum thalictroides]	--	A0A7J6V3J7_THATH SubName: Full=Transmembrane protein {ECO:0000313|EMBL:KAF5179331.1};	--	GO:0016021,integral component of membrane; GO:0005575,cellular_component; GO:0016020,membrane; GO:0031224,intrinsic component of membrane; GO:0110165,cellular anatomical entity	--
IFM89_002813	K21693 protopine 6-monooxygenase [EC:1.14.14.98] | (RefSeq) protopine 6-monooxygenase-like (A)	ko00950: Isoquinoline alkaloid biosynthesis; ko01100: Metabolic pathways; ko01110: Biosynthesis of secondary metabolites	hypothetical protein IFM89_002813 [Coptis chinensis]	P6H_ESCCA RecName: Full=Protopine 6-monooxygenase; EC=1.14.14.98 {ECO:0000269|PubMed:22421633}; AltName: Full=Protopine 6-hydroxylase; Short=P6H;	A0A835HVN9_9MAGN SubName: Full=Uncharacterized protein {ECO:0000313|EMBL:KAF9604138.1};	Cytochrome P450 CYP2 subfamily	GO:0005789,endoplasmic reticulum membrane; GO:0016021,integral component of membrane; GO:0020037,heme binding; GO:0005506,iron ion binding; GO:0047087,protopine 6-monooxygenase activity; GO:0033075,isoquinoline alkaloid biosynthetic process; GO:0003674,molecular_function; GO:0005488,binding; GO:0046906,tetrapyrrole binding; GO:0097159,organic cyclic compound binding; GO:1901363,heterocyclic compo…	PF00067.25:Cytochrome P450
IFM89_018021	K05894 12-oxophytodienoic acid reductase [EC:1.3.1.42] | (RefSeq) 12-oxophytodienoate reductase 2-like (A)	ko00592: alpha-Linolenic acid metabolism; ko01100: Metabolic pathways; ko01110: Biosynthesis of secondary metabolites	hypothetical protein IFM89_018021 [Coptis chinensis]	OPR11_ORYSJ RecName: Full=Putative 12-oxophytodienoate reductase 11; EC=1.3.1.-; AltName: Full=OPDA-reductase 11; Short=OsOPR11;	A0A835LRQ3_9MAGN RecName: Full=Oxidored_FMN domain-containing protein {ECO:0000259|Pfam:PF00724};	NADH:flavin oxidoreductase/12-oxophytodienoate reductase	GO:0010181,FMN binding; GO:0016491,oxidoreductase activity; GO:0006633,fatty acid biosynthetic process; GO:0031408,oxylipin biosynthetic process; GO:0000166,nucleotide binding; GO:0003674,molecular_function; GO:0005488,binding; GO:0032553,ribonucleotide binding; GO:0036094,small molecule binding; GO:0043167,ion binding; GO:0043168,anion binding; GO:0097159,organic cyclic compound binding; GO:0097…	PF00724.23:NADH:flavin oxidoreductase / NADH oxidase family
IFM89_027023	K20617 cytochrome P450 family 71 subfamily A | (RefSeq) cytochrome P450 71A1-like (A)	--	hypothetical protein IFM89_027023 [Coptis chinensis]	C71A1_PERAE RecName: Full=Cytochrome P450 71A1; EC=1.14.-.-; AltName: Full=ARP-2; AltName: Full=CYPLXXIA1;	A0A835IG23_9MAGN SubName: Full=Uncharacterized protein {ECO:0000313|EMBL:KAF9615902.1};	Cytochrome P450 CYP2 subfamily	GO:0005789,endoplasmic reticulum membrane; GO:0016021,integral component of membrane; GO:0020037,heme binding; GO:0005506,iron ion binding; GO:0004497,monooxygenase activity; GO:0016705,oxidoreductase activity, acting on paired donors, with incorporation or reduction of molecular oxygen; GO:0009835,fruit ripening; GO:0003674,molecular_function; GO:0005488,binding; GO:0046906,tetrapyrrole binding;…	PF00067.25:Cytochrome P450
IFM89_005639	--	--	hypothetical protein IFM89_005639, partial [Coptis chinensis]	--	A0A835IUI8_9MAGN SubName: Full=Uncharacterized protein {ECO:0000313|EMBL:KAF9623871.1}; Flags: Fragment;	--	--	PF13431.9:Tetratricopeptide repeat
IFM89_005627	K14491 two-component response regulator ARR-B family | (RefSeq) two-component response regulator ARR2-like (A)	ko04075: Plant hormone signal transduction	hypothetical protein IFM89_005627 [Coptis chinensis]	ARR2_ARATH RecName: Full=Two-component response regulator ARR2; AltName: Full=Receiver-like protein 5;	A0A835LYN6_9MAGN SubName: Full=Uncharacterized protein {ECO:0000313|EMBL:KAF9604301.1};	GATA-4/5/6 transcription factors	GO:0005829,cytosol; GO:0005634,nucleus; GO:0003677,DNA binding; GO:0003700,DNA-binding transcription factor activity; GO:0000156,phosphorelay response regulator activity; GO:0071368,cellular response to cytokinin stimulus; GO:0009736,cytokinin-activated signaling pathway; GO:0009873,ethylene-activated signaling pathway; GO:0010150,leaf senescence; GO:0010082,regulation of root meristem growth; GO…	PF00072.27:Response regulator receiver domain
novel.6389	--	--	--	--	--	--	--	--
IFM89_036810	K17500 integrin-linked kinase-associated serine/threonine phosphatase 2C [EC:3.1.3.16] | (RefSeq) WAT1-related protein At3g18200 isoform X1 (A)	--	hypothetical protein IFM89_036810, partial [Coptis chinensis]	WTR38_ARATH RecName: Full=WAT1-related protein At5g07050;	A0A835HLZ9_9MAGN RecName: Full=WAT1-related protein {ECO:0000256|RuleBase:RU363077};	--	GO:0016021,integral component of membrane; GO:0005886,plasma membrane; GO:0022857,transmembrane transporter activity; GO:0003674,molecular_function; GO:0005215,transporter activity; GO:0005575,cellular_component; GO:0016020,membrane; GO:0031224,intrinsic component of membrane; GO:0110165,cellular anatomical entity; GO:0071944,cell periphery	PF00892.23:EamA-like transporter family
IFM89_021552	K12135 zinc finger protein CONSTANS | (RefSeq) zinc finger protein CONSTANS-LIKE 2-like (A)	ko04712: Circadian rhythm - plant	hypothetical protein IFM89_021552 [Coptis chinensis]	COL4_ARATH RecName: Full=Zinc finger protein CONSTANS-LIKE 4;	A0A835IFW1_9MAGN SubName: Full=Uncharacterized protein {ECO:0000313|EMBL:KAF9614998.1};	GATA-4/5/6 transcription factors	GO:0005634,nucleus; GO:0008270,zinc ion binding; GO:0009909,regulation of flower development; GO:0003674,molecular_function; GO:0005488,binding; GO:0043167,ion binding; GO:0043169,cation binding; GO:0046872,metal ion binding; GO:0046914,transition metal ion binding; GO:0000003,reproduction; GO:0003006,developmental process involved in reproduction; GO:0007275,multicellular organism development; G…	PF06203.17:CCT motif
IFM89_037153	K00924 kinase [EC:2.7.1.-] | (RefSeq) probable serine/threonine-protein kinase Cx32, chloroplastic (A)	--	hypothetical protein IFM89_037153 [Coptis chinensis]	PIX13_ARATH RecName: Full=Probable serine/threonine-protein kinase PIX13 {ECO:0000305}; EC=2.7.11.1 {ECO:0000305};	A0A835LXI6_9MAGN RecName: Full=Protein kinase domain-containing protein {ECO:0000259|PROSITE:PS50011};	Serine/threonine protein kinase	GO:0005634,nucleus; GO:0005886,plasma membrane; GO:0005524,ATP binding; GO:0106310,protein serine kinase activity; GO:0004674,protein serine/threonine kinase activity; GO:0006952,defense response; GO:0006468,protein phosphorylation; GO:0000166,nucleotide binding; GO:0003674,molecular_function; GO:0005488,binding; GO:0017076,purine nucleotide binding; GO:0030554,adenyl nucleotide binding; GO:00325…	PF07714.20:Protein tyrosine and serine/threonine kinase
IFM89_008212	K02291 15-cis-phytoene synthase [EC:2.5.1.32] | (RefSeq) phytoene synthase 2, chloroplastic (A)	ko00906: Carotenoid biosynthesis; ko01100: Metabolic pathways; ko01110: Biosynthesis of secondary metabolites	hypothetical protein IFM89_008212 [Coptis chinensis]	PSY2_SOLLC RecName: Full=Phytoene synthase 2, chloroplastic; EC=2.5.1.32; Flags: Precursor; Fragment;	A0A835GYD4_9MAGN SubName: Full=Uncharacterized protein {ECO:0000313|EMBL:KAF9588198.1};	Squalene synthetase	GO:0009507,chloroplast; GO:0004311,farnesyltranstransferase activity; GO:0016767,geranylgeranyl-diphosphate geranylgeranyltransferase activity; GO:0016117,carotenoid biosynthetic process; GO:0003674,molecular_function; GO:0003824,catalytic activity; GO:0004659,prenyltransferase activity; GO:0016740,transferase activity; GO:0016765,transferase activity, transferring alkyl or aryl (other than methy…	PF00494.22:Squalene/phytoene synthase
IFM89_007744	--	--	hypothetical protein IFM89_007744 [Coptis chinensis]	--	A0A835ITX9_9MAGN RecName: Full=PHD domain-containing protein {ECO:0000259|SMART:SM00249};	--	GO:0046872,metal ion binding; GO:0006281,DNA repair; GO:0003674,molecular_function; GO:0005488,binding; GO:0043167,ion binding; GO:0043169,cation binding; GO:0006139,nucleobase-containing compound metabolic process; GO:0006259,DNA metabolic process; GO:0006725,cellular aromatic compound metabolic process; GO:0006807,nitrogen compound metabolic process; GO:0006950,response to stress; GO:0006974,ce…	PF03107.19:C1 domain
IFM89_023300	K03327 multidrug resistance protein, MATE family | (RefSeq) protein DETOXIFICATION 40-like (A)	--	hypothetical protein IFM89_023300 [Coptis chinensis]	DTX40_ARATH RecName: Full=Protein DETOXIFICATION 40 {ECO:0000303|PubMed:11739388}; Short=AtDTX40 {ECO:0000303|PubMed:11739388}; AltName: Full=Multidrug and toxic compound extrusion protein 40 {ECO:0000305}; Short=MATE protein 40 {ECO:0000305};	A0A835GXH3_9MAGN RecName: Full=Protein DETOXIFICATION {ECO:0000256|RuleBase:RU004914}; AltName: Full=Multidrug and toxic compound extrusion protein {ECO:0000256|RuleBase:RU004914};	Uncharacterized membrane protein, predicted efflux pump	GO:0016021,integral component of membrane; GO:0016020,membrane; GO:0000325,plant-type vacuole; GO:0005774,vacuolar membrane; GO:0005773,vacuole; GO:0015297,antiporter activity; GO:0022857,transmembrane transporter activity; GO:0042910,xenobiotic transmembrane transporter activity; GO:1990961,xenobiotic detoxification by transmembrane export across the plasma membrane; GO:0003674,molecular_functio…	PF01554.21:MatE
IFM89_003476	K00924 kinase [EC:2.7.1.-] | (RefSeq) probable serine/threonine-protein kinase PBL19 (A)	--	hypothetical protein IFM89_003476 [Coptis chinensis]	PBL34_ARATH RecName: Full=Serine/threonine-protein kinase PBL34 {ECO:0000303|PubMed:29907700}; EC=2.7.11.1 {ECO:0000269|PubMed:31922267}; AltName: Full=PBS1-like protein 34 {ECO:0000303|PubMed:29907700}; AltName: Full=Receptor-like cytoplasmic kinase PBL34 {ECO:0000303|PubMed:29907700};	A0A835LLB7_9MAGN RecName: Full=Protein kinase domain-containing protein {ECO:0000259|PROSITE:PS50011};	Serine/threonine protein kinase	GO:0005886,plasma membrane; GO:0005524,ATP binding; GO:0106310,protein serine kinase activity; GO:0004674,protein serine/threonine kinase activity; GO:0006952,defense response; GO:0031663,lipopolysaccharide-mediated signaling pathway; GO:0002221,pattern recognition receptor signaling pathway; GO:0006468,protein phosphorylation; GO:0000166,nucleotide binding; GO:0003674,molecular_function; GO:0005…	PF07714.20:Protein tyrosine and serine/threonine kinase
IFM89_021705	K12133 MYB-related transcription factor LHY | (RefSeq) protein CCA1 (A)	ko04712: Circadian rhythm - plant	hypothetical protein IFM89_021705 [Coptis chinensis]	RVE1_ARATH RecName: Full=Protein REVEILLE 1;	A0A835IWY9_9MAGN SubName: Full=Uncharacterized protein {ECO:0000313|EMBL:KAF9625335.1};	Zuotin and related molecular chaperones (DnaJ superfamily), contains DNA-binding domains	GO:0005634,nucleus; GO:0003677,DNA binding; GO:0003700,DNA-binding transcription factor activity; GO:0009734,auxin-activated signaling pathway; GO:0007623,circadian rhythm; GO:0010600,regulation of auxin biosynthetic process; GO:0006355,regulation of DNA-templated transcription; GO:0003674,molecular_function; GO:0003676,nucleic acid binding; GO:0005488,binding; GO:0097159,organic cyclic compound …	PF00249.34:Myb-like DNA-binding domain
IFM89_024002	K16292 KDEL-tailed cysteine endopeptidase [EC:3.4.22.-] | (RefSeq) senescence-specific cysteine protease SAG39-like (A)	--	hypothetical protein IFM89_024002 [Coptis chinensis]	SAG39_ORYSJ RecName: Full=Senescence-specific cysteine protease SAG39 {ECO:0000305}; EC=3.4.22.- {ECO:0000305}; AltName: Full=Cysteine proteinase SAG39 {ECO:0000305}; AltName: Full=Protein SENESCENCE-ASSOCIATED GENE 39 {ECO:0000303|PubMed:20439547}; Flags: Precursor;	A0A835H7I7_9MAGN SubName: Full=Uncharacterized protein {ECO:0000313|EMBL:KAF9593509.1};	Cysteine proteinase Cathepsin L	GO:0005615,extracellular space; GO:0005764,lysosome; GO:0010282,senescence-associated vacuole; GO:0004197,cysteine-type endopeptidase activity; GO:0007568,aging; GO:0010150,leaf senescence; GO:0010623,programmed cell death involved in cell development; GO:0051603,proteolysis involved in protein catabolic process; GO:0009737,response to abscisic acid; GO:0009723,response to ethylene; GO:0009739,re…	PF00112.26:Papain family cysteine protease
IFM89_018347	--	--	hypothetical protein IFM89_018347 [Coptis chinensis]	--	A0A835LQK6_9MAGN SubName: Full=Uncharacterized protein {ECO:0000313|EMBL:KAF9601237.1};	--	GO:0005199,structural constituent of cell wall; GO:0009664,plant-type cell wall organization; GO:0003674,molecular_function; GO:0005198,structural molecule activity; GO:0008150,biological_process; GO:0009987,cellular process; GO:0016043,cellular component organization; GO:0045229,external encapsulating structure organization; GO:0071554,cell wall organization or biogenesis; GO:0071555,cell wall o…	PF04554.16:Extensin-like region
IFM89_023108	--	--	hypothetical protein IFM89_023108 [Coptis chinensis]	Y5848_ARATH RecName: Full=Uncharacterized protein At5g48480;	A0A835LSN8_9MAGN RecName: Full=VOC domain-containing protein {ECO:0000259|PROSITE:PS51819};	--	GO:0005829,cytosol; GO:0005575,cellular_component; GO:0005622,intracellular anatomical structure; GO:0005737,cytoplasm; GO:0110165,cellular anatomical entity	PF18029.4:Glyoxalase-like domain
IFM89_011974	K09487 heat shock protein 90kDa beta | (RefSeq) endoplasmin homolog isoform X1 (A)	ko04141: Protein processing in endoplasmic reticulum; ko04626: Plant-pathogen interaction	hypothetical protein IFM89_011974 [Coptis chinensis]	NFD4_ARATH RecName: Full=Protein NUCLEAR FUSION DEFECTIVE 4 {ECO:0000303|PubMed:16698901};	A0A835I7D5_9MAGN RecName: Full=Nodulin-like domain-containing protein {ECO:0000259|Pfam:PF06813};	--	GO:0016021,integral component of membrane; GO:0016020,membrane; GO:0005739,mitochondrion; GO:0000741,karyogamy; GO:0010197,polar nucleus fusion; GO:0009651,response to salt stress; GO:0006996,organelle organization; GO:0006997,nucleus organization; GO:0008150,biological_process; GO:0009987,cellular process; GO:0016043,cellular component organization; GO:0048284,organelle fusion; GO:0071840,cellul…	PF06813.16:Nodulin-like
IFM89_018143	K00799 glutathione S-transferase [EC:2.5.1.18] | (RefSeq) glutathione S-transferase F13 (A)	ko00480: Glutathione metabolism; ko01100: Metabolic pathways	hypothetical protein IFM89_018143 [Coptis chinensis]	GSTFD_ARATH RecName: Full=Glutathione S-transferase F13; Short=AtGSTF13; EC=2.5.1.18; AltName: Full=GST class-phi member 13;	A0A835HWM8_9MAGN RecName: Full=Glutathione transferase {ECO:0000256|ARBA:ARBA00012452}; EC=2.5.1.18 {ECO:0000256|ARBA:ARBA00012452};	Glutathione S-transferase	GO:0005737,cytoplasm; GO:0005829,cytosol; GO:0043295,glutathione binding; GO:0004364,glutathione transferase activity; GO:0006749,glutathione metabolic process; GO:0009407,toxin catabolic process; GO:0003674,molecular_function; GO:0005488,binding; GO:0033218,amide binding; GO:0042277,peptide binding; GO:0043167,ion binding; GO:0043168,anion binding; GO:0072341,modified amino acid binding; GO:1900…	PF02798.23:Glutathione S-transferase, N-terminal domain
IFM89_039610	--	--	hypothetical protein IFM89_039610 [Coptis chinensis]	RUS6_ARATH RecName: Full=Protein root UVB sensitive 6 {ECO:0000303|PubMed:19515790};	A0A835LAG8_9MAGN SubName: Full=Uncharacterized protein {ECO:0000313|EMBL:KAF9587170.1};	Uncharacterized conserved protein	--	PF04884.17:Vitamin B6 photo-protection and homoeostasis
novel.3907	--	--	--	--	--	--	--	--
IFM89_012231	K13354 solute carrier family 25 (peroxisomal adenine nucleotide transporter), member 17 | (RefSeq) peroxisomal nicotinamide adenine dinucleotide carrier-like (A)	ko04146: Peroxisome	hypothetical protein IFM89_012231 [Coptis chinensis]	PP176_ARATH RecName: Full=Pentatricopeptide repeat-containing protein At2g30100, chloroplastic; Flags: Precursor;	A0A835LIW9_9MAGN SubName: Full=Uncharacterized protein {ECO:0000313|EMBL:KAF9596500.1};	--	GO:0009507,chloroplast; GO:0005575,cellular_component; GO:0005622,intracellular anatomical structure; GO:0005737,cytoplasm; GO:0009536,plastid; GO:0043226,organelle; GO:0043227,membrane-bounded organelle; GO:0043229,intracellular organelle; GO:0043231,intracellular membrane-bounded organelle; GO:0110165,cellular anatomical entity	PF13041.9:PPR repeat family
[truncated: 25,427 more rows]
