# Supplementary material for: Transcriptome and Metabolome Analysis of Isoquinoline Alkaloid Biosynthesis of Coptis chinensis in Different Years
Source: Genes (Basel). 2023 Dec 18;14(12):2232. doi: 10.3390/genes14122232 (PMC10742649; doi:10.3390/genes14122232)
Supplement: Supplementary file 1 [file genes-14-02232-s001.zip › Supplementary Table S3 Genes annotation in NR.xlsx]

## Sheet: Sheet1
ID	Annotation
IFM89_033633	hypothetical protein IFM89_033633 [Coptis chinensis]
IFM89_016960	hypothetical protein IFM89_016960 [Coptis chinensis]
IFM89_034423	hypothetical protein IFM89_034423 [Coptis chinensis]
IFM89_032556	hypothetical protein IFM89_032556 [Coptis chinensis]
novel.7566	hypothetical protein IFM89_017630 [Coptis chinensis]
IFM89_011601	hypothetical protein IFM89_011601 [Coptis chinensis]
IFM89_016693	hypothetical protein IFM89_016693 [Coptis chinensis]
IFM89_029507	hypothetical protein IFM89_029507 [Coptis chinensis]
IFM89_028660	hypothetical protein IFM89_028660 [Coptis chinensis]
IFM89_004116	hypothetical protein IFM89_004116, partial [Coptis chinensis]
IFM89_016791	hypothetical protein IFM89_016791 [Coptis chinensis]
IFM89_018130	hypothetical protein IFM89_018130 [Coptis chinensis]
IFM89_034725	hypothetical protein IFM89_034725 [Coptis chinensis]
IFM89_016713	hypothetical protein IFM89_016713 [Coptis chinensis]
IFM89_005173	hypothetical protein IFM89_005173 [Coptis chinensis]
IFM89_021695	Oberon-like protein [Thalictrum thalictroides]
IFM89_025626	hypothetical protein IFM89_025626 [Coptis chinensis]
IFM89_038438	hypothetical protein IFM89_038438 [Coptis chinensis]
IFM89_014288	hypothetical protein IFM89_014288 [Coptis chinensis]
novel.3090	hypothetical protein AQUCO_01300562v1 [Aquilegia coerulea]
IFM89_013433	hypothetical protein IFM89_013433 [Coptis chinensis]
novel.3183	hypothetical protein AQUCO_01400570v1 [Aquilegia coerulea]
IFM89_018919	hypothetical protein IFM89_018919 [Coptis chinensis]
IFM89_014928	hypothetical protein IFM89_014928 [Coptis chinensis]
IFM89_037381	hypothetical protein IFM89_037381 [Coptis chinensis]
IFM89_002418	hypothetical protein IFM89_002418 [Coptis chinensis]
IFM89_001988	hypothetical protein IFM89_001988 [Coptis chinensis]
IFM89_009523	hypothetical protein IFM89_009523 [Coptis chinensis]
IFM89_016965	hypothetical protein IFM89_016965 [Coptis chinensis]
IFM89_029031	hypothetical protein IFM89_029031 [Coptis chinensis]
IFM89_010499	hypothetical protein IFM89_010499 [Coptis chinensis]
IFM89_005779	hypothetical protein IFM89_005779 [Coptis chinensis]
IFM89_030295	hypothetical protein IFM89_030295 [Coptis chinensis]
novel.6557	Vesicle transport v-snare [Thalictrum thalictroides]
IFM89_019818	hypothetical protein IFM89_019818 [Coptis chinensis]
IFM89_033856	hypothetical protein IFM89_033856, partial [Coptis chinensis]
IFM89_003733	hypothetical protein IFM89_003733 [Coptis chinensis]
IFM89_038178	hypothetical protein IFM89_038178 [Coptis chinensis]
IFM89_033983	hypothetical protein IFM89_033983 [Coptis chinensis]
IFM89_015272	hypothetical protein IFM89_015272 [Coptis chinensis]
IFM89_023516	hypothetical protein IFM89_023516 [Coptis chinensis]
novel.6789	hypothetical protein AQUCO_11000006v1 [Aquilegia coerulea]
novel.6353	hypothetical protein IFM89_012686 [Coptis chinensis]
IFM89_034846	hypothetical protein IFM89_034846 [Coptis chinensis]
IFM89_004602	hypothetical protein IFM89_004602 [Coptis chinensis]
IFM89_027923	hypothetical protein IFM89_027923 [Coptis chinensis]
IFM89_012412	hypothetical protein IFM89_012412 [Coptis chinensis]
IFM89_016410	hypothetical protein IFM89_016410 [Coptis chinensis]
IFM89_025458	hypothetical protein IFM89_025458 [Coptis chinensis]
IFM89_004970	hypothetical protein IFM89_004970 [Coptis chinensis]
IFM89_007330	uncharacterized protein DS421_18g612810 [Arachis hypogaea]
IFM89_002224	hypothetical protein IFM89_002224 [Coptis chinensis]
IFM89_030593	hypothetical protein IFM89_030593 [Coptis chinensis]
IFM89_018380	hypothetical protein IFM89_018380 [Coptis chinensis]
IFM89_012949	hypothetical protein IFM89_012949 [Coptis chinensis]
IFM89_007551	hypothetical protein IFM89_007551 [Coptis chinensis]
IFM89_012393	hypothetical protein IFM89_007897 [Coptis chinensis]
IFM89_005116	hypothetical protein IFM89_005116 [Coptis chinensis]
IFM89_008715	hypothetical protein IFM89_008715 [Coptis chinensis]
novel.5547	hypothetical protein BVC80_9055g9 [Macleaya cordata]
IFM89_004627	hypothetical protein IFM89_004627 [Coptis chinensis]
novel.8106	Homeobox protein knotted-1-like 2 [Vitis vinifera]
IFM89_014570	hypothetical protein IFM89_014570 [Coptis chinensis]
IFM89_016433	hypothetical protein IFM89_016433 [Coptis chinensis]
novel.2125	hypothetical protein IFM89_022420 [Coptis chinensis]
novel.8345	hypothetical protein BUALT_Bualt09G0003400 [Buddleja alternifolia]
IFM89_021560	hypothetical protein IFM89_021560 [Coptis chinensis]
IFM89_018345	hypothetical protein IFM89_018345 [Coptis chinensis]
IFM89_002458	hypothetical protein IFM89_002458 [Coptis chinensis]
IFM89_020691	hypothetical protein IFM89_020691 [Coptis chinensis]
IFM89_014217	hypothetical protein IFM89_014217 [Coptis chinensis]
novel.8113	hypothetical protein AQUCO_13300024v1 [Aquilegia coerulea]
novel.3956	probable protein S-acyltransferase 7 [Telopea speciosissima]
IFM89_006888	hypothetical protein IFM89_006888 [Coptis chinensis]
IFM89_011975	hypothetical protein IFM89_011975 [Coptis chinensis]
IFM89_032854	hypothetical protein IFM89_032854 [Coptis chinensis]
IFM89_034180	hypothetical protein IFM89_034180 [Coptis chinensis]
novel.3269	hypothetical protein AQUCO_03600078v1 [Aquilegia coerulea]
IFM89_009525	hypothetical protein IFM89_009525 [Coptis chinensis]
IFM89_009131	hypothetical protein IFM89_009131 [Coptis chinensis]
IFM89_022620	hypothetical protein IFM89_022620 [Coptis chinensis]
IFM89_012137	hypothetical protein IFM89_012137 [Coptis chinensis]
IFM89_022021	hypothetical protein IFM89_022021 [Coptis chinensis]
IFM89_032015	hypothetical protein IFM89_032015 [Coptis chinensis]
IFM89_020308	hypothetical protein IFM89_020308, partial [Coptis chinensis]
IFM89_021954	hypothetical protein IFM89_021954 [Coptis chinensis]
IFM89_011008	hypothetical protein IFM89_011008 [Coptis chinensis]
IFM89_036526	hypothetical protein IFM89_036526 [Coptis chinensis]
IFM89_010682	hypothetical protein IFM89_010682 [Coptis chinensis]
IFM89_006662	hypothetical protein IFM89_006662 [Coptis chinensis]
IFM89_000111	hypothetical protein IFM89_000111 [Coptis chinensis]
IFM89_012538	hypothetical protein IFM89_012538 [Coptis chinensis]
novel.8045	hypothetical protein IFM89_024851 [Coptis chinensis]
IFM89_003004	hypothetical protein IFM89_003004 [Coptis chinensis]
IFM89_011005	hypothetical protein IFM89_011005 [Coptis chinensis]
IFM89_025610	hypothetical protein IFM89_025610 [Coptis chinensis]
IFM89_015797	hypothetical protein IFM89_015797 [Coptis chinensis]
IFM89_019951	hypothetical protein IFM89_019951 [Coptis chinensis]
IFM89_001641	hypothetical protein IFM89_001641 [Coptis chinensis]
IFM89_009002	hypothetical protein IFM89_009002 [Coptis chinensis]
IFM89_038392	hypothetical protein IFM89_038392 [Coptis chinensis]
novel.3904	hypothetical protein IFM89_008116, partial [Coptis chinensis]
IFM89_031645	hypothetical protein IFM89_031645 [Coptis chinensis]
IFM89_036586	hypothetical protein IFM89_036586 [Coptis chinensis]
IFM89_011528	hypothetical protein IFM89_011528 [Coptis chinensis]
IFM89_035040	hypothetical protein IFM89_035040 [Coptis chinensis]
IFM89_003647	hypothetical protein IFM89_003647 [Coptis chinensis]
IFM89_020846	hypothetical protein IFM89_020846 [Coptis chinensis]
IFM89_018830	hypothetical protein IFM89_018830 [Coptis chinensis]
IFM89_030396	hypothetical protein IFM89_030396 [Coptis chinensis]
IFM89_026391	hypothetical protein IFM89_026391 [Coptis chinensis]
IFM89_024738	hypothetical protein IFM89_024738 [Coptis chinensis]
IFM89_017557	hypothetical protein IFM89_017557 [Coptis chinensis]
IFM89_002575	hypothetical protein IFM89_002575 [Coptis chinensis]
IFM89_035318	hypothetical protein IFM89_035318 [Coptis chinensis]
IFM89_029133	hypothetical protein IFM89_029133 [Coptis chinensis]
IFM89_026642	hypothetical protein IFM89_026642 [Coptis chinensis]
IFM89_017076	hypothetical protein IFM89_017076 [Coptis chinensis]
IFM89_018251	hypothetical protein IFM89_018251 [Coptis chinensis]
IFM89_037840	hypothetical protein IFM89_037840 [Coptis chinensis]
IFM89_003532	hypothetical protein IFM89_003532, partial [Coptis chinensis]
IFM89_014745	hypothetical protein IFM89_014745 [Coptis chinensis]
IFM89_020629	hypothetical protein IFM89_020629 [Coptis chinensis]
IFM89_016128	hypothetical protein IFM89_016128 [Coptis chinensis]
IFM89_021509	hypothetical protein IFM89_021509 [Coptis chinensis]
IFM89_024851	hypothetical protein IFM89_024851 [Coptis chinensis]
IFM89_035490	hypothetical protein IFM89_035490 [Coptis chinensis]
IFM89_013994	hypothetical protein IFM89_013994, partial [Coptis chinensis]
IFM89_010706	hypothetical protein IFM89_010706 [Coptis chinensis]
IFM89_031861	hypothetical protein IFM89_031861 [Coptis chinensis]
IFM89_003654	hypothetical protein IFM89_003654 [Coptis chinensis]
IFM89_030957	hypothetical protein IFM89_030957 [Coptis chinensis]
IFM89_026392	hypothetical protein IFM89_026392 [Coptis chinensis]
IFM89_006966	hypothetical protein IFM89_006966 [Coptis chinensis]
IFM89_000076	hypothetical protein IFM89_000076 [Coptis chinensis]
IFM89_033080	hypothetical protein IFM89_033080 [Coptis chinensis]
IFM89_006261	hypothetical protein IFM89_006261 [Coptis chinensis]
IFM89_018635	hypothetical protein IFM89_018635 [Coptis chinensis]
IFM89_005863	hypothetical protein IFM89_005863 [Coptis chinensis]
IFM89_011292	hypothetical protein IFM89_011292 [Coptis chinensis]
IFM89_008058	hypothetical protein IFM89_008058 [Coptis chinensis]
IFM89_018100	hypothetical protein IFM89_018100 [Coptis chinensis]
IFM89_024076	hypothetical protein IFM89_024076 [Coptis chinensis]
IFM89_012573	hypothetical protein IFM89_012573 [Coptis chinensis]
IFM89_001847	hypothetical protein IFM89_001847 [Coptis chinensis]
IFM89_022468	hypothetical protein IFM89_022468 [Coptis chinensis]
IFM89_008462	hypothetical protein IFM89_008462 [Coptis chinensis]
IFM89_007767	hypothetical protein IFM89_007767 [Coptis chinensis]
IFM89_005282	hypothetical protein IFM89_005282 [Coptis chinensis]
IFM89_004668	hypothetical protein IFM89_004668 [Coptis chinensis]
IFM89_010966	hypothetical protein IFM89_010966 [Coptis chinensis]
IFM89_037096	hypothetical protein IFM89_037096, partial [Coptis chinensis]
IFM89_002006	hypothetical protein IFM89_002006 [Coptis chinensis]
IFM89_029287	hypothetical protein IFM89_029287 [Coptis chinensis]
IFM89_029476	hypothetical protein IFM89_029476 [Coptis chinensis]
IFM89_006127	hypothetical protein IFM89_006127 [Coptis chinensis]
IFM89_029953	hypothetical protein IFM89_029953 [Coptis chinensis]
IFM89_016567	hypothetical protein IFM89_016567 [Coptis chinensis]
IFM89_002632	hypothetical protein IFM89_002632 [Coptis chinensis]
IFM89_000767	hypothetical protein IFM89_000767 [Coptis chinensis]
IFM89_037850	hypothetical protein IFM89_037850 [Coptis chinensis]
novel.6694	Phd finger family protein [Thalictrum thalictroides]
IFM89_026138	hypothetical protein IFM89_026138 [Coptis chinensis]
IFM89_031309	hypothetical protein IFM89_031309 [Coptis chinensis]
novel.8120	class-I knotted1-like homeobox protein IBKN3 [Ipomoea batatas]
IFM89_038746	hypothetical protein IFM89_038746 [Coptis chinensis]
IFM89_022307	hypothetical protein IFM89_022307 [Coptis chinensis]
IFM89_016535	hypothetical protein IFM89_016535 [Coptis chinensis]
IFM89_018609	hypothetical protein IFM89_018609 [Coptis chinensis]
IFM89_000580	hypothetical protein IFM89_000580 [Coptis chinensis]
IFM89_029065	hypothetical protein IFM89_029065 [Coptis chinensis]
IFM89_009083	hypothetical protein IFM89_009083 [Coptis chinensis]
IFM89_033162	hypothetical protein IFM89_033162 [Coptis chinensis]
IFM89_032849	hypothetical protein IFM89_032849 [Coptis chinensis]
IFM89_016480	hypothetical protein IFM89_016480 [Coptis chinensis]
IFM89_024488	hypothetical protein IFM89_024488 [Coptis chinensis]
IFM89_019462	hypothetical protein IFM89_019462 [Coptis chinensis]
IFM89_008136	hypothetical protein IFM89_008136 [Coptis chinensis]
IFM89_034548	hypothetical protein IFM89_034548 [Coptis chinensis]
IFM89_022539	hypothetical protein IFM89_022539, partial [Coptis chinensis]
IFM89_010632	hypothetical protein IFM89_010632 [Coptis chinensis]
IFM89_037388	hypothetical protein IFM89_037388 [Coptis chinensis]
novel.4438	hypothetical protein IFM89_019883 [Coptis chinensis]
IFM89_015844	hypothetical protein IFM89_015844 [Coptis chinensis]
IFM89_028719	hypothetical protein IFM89_028719 [Coptis chinensis]
IFM89_018751	hypothetical protein IFM89_018751 [Coptis chinensis]
novel.1362	hypothetical protein IFM89_035678 [Coptis chinensis]
IFM89_008685	hypothetical protein IFM89_008685 [Coptis chinensis]
IFM89_037117	hypothetical protein IFM89_037117 [Coptis chinensis]
IFM89_029861	hypothetical protein IFM89_029861, partial [Coptis chinensis]
IFM89_038112	hypothetical protein IFM89_038112 [Coptis chinensis]
IFM89_039622	hypothetical protein IFM89_039622 [Coptis chinensis]
IFM89_023647	hypothetical protein IFM89_023647 [Coptis chinensis]
IFM89_033889	hypothetical protein IFM89_033889 [Coptis chinensis]
novel.593	hypothetical protein AQUCO_03000016v1 [Aquilegia coerulea]
IFM89_018004	hypothetical protein IFM89_018004 [Coptis chinensis]
IFM89_002698	hypothetical protein IFM89_002698 [Coptis chinensis]
IFM89_032024	hypothetical protein IFM89_032024 [Coptis chinensis]
IFM89_004629	hypothetical protein IFM89_004629 [Coptis chinensis]
IFM89_034758	hypothetical protein IFM89_034758 [Coptis chinensis]
IFM89_001149	hypothetical protein IFM89_001149 [Coptis chinensis]
IFM89_015177	hypothetical protein IFM89_015177 [Coptis chinensis]
novel.7131	hypothetical protein IFM89_033739 [Coptis chinensis]
IFM89_027461	hypothetical protein IFM89_027461 [Coptis chinensis]
IFM89_010014	hypothetical protein IFM89_010014 [Coptis chinensis]
IFM89_030785	hypothetical protein IFM89_030785 [Coptis chinensis]
IFM89_008926	hypothetical protein IFM89_008926 [Coptis chinensis]
IFM89_023610	hypothetical protein IFM89_023610 [Coptis chinensis]
IFM89_011511	hypothetical protein IFM89_011511 [Coptis chinensis]
IFM89_009468	hypothetical protein IFM89_009468 [Coptis chinensis]
IFM89_032585	hypothetical protein IFM89_032585 [Coptis chinensis]
IFM89_026031	hypothetical protein IFM89_026031 [Coptis chinensis]
IFM89_039147	hypothetical protein AQUCO_00700874v1 [Aquilegia coerulea]
IFM89_014053	hypothetical protein IFM89_014053 [Coptis chinensis]
novel.46	hypothetical protein IFM89_008116, partial [Coptis chinensis]
IFM89_039815	hypothetical protein IFM89_039815 [Coptis chinensis]
IFM89_023101	hypothetical protein IFM89_023101 [Coptis chinensis]
IFM89_016616	hypothetical protein IFM89_016616 [Coptis chinensis]
IFM89_038314	hypothetical protein IFM89_038314 [Coptis chinensis]
IFM89_015541	hypothetical protein IFM89_015541 [Coptis chinensis]
IFM89_023100	hypothetical protein IFM89_023100 [Coptis chinensis]
IFM89_010054	hypothetical protein IFM89_010054 [Coptis chinensis]
IFM89_003751	hypothetical protein IFM89_003751 [Coptis chinensis]
IFM89_022703	hypothetical protein IFM89_022703 [Coptis chinensis]
novel.2349	hypothetical protein IFM89_012554 [Coptis chinensis]
IFM89_039615	hypothetical protein IFM89_039615, partial [Coptis chinensis]
IFM89_018355	hypothetical protein IFM89_018355 [Coptis chinensis]
IFM89_037826	hypothetical protein IFM89_037826 [Coptis chinensis]
IFM89_030333	hypothetical protein IFM89_030333 [Coptis chinensis]
IFM89_007361	hypothetical protein IFM89_007361 [Coptis chinensis]
IFM89_033148	hypothetical protein IFM89_033148 [Coptis chinensis]
IFM89_035697	hypothetical protein IFM89_035697 [Coptis chinensis]
IFM89_038459	hypothetical protein IFM89_038459 [Coptis chinensis]
IFM89_019880	hypothetical protein IFM89_019880 [Coptis chinensis]
IFM89_014779	hypothetical protein IFM89_014779 [Coptis chinensis]
IFM89_025630	hypothetical protein IFM89_025630 [Coptis chinensis]
IFM89_037011	hypothetical protein IFM89_037011 [Coptis chinensis]
IFM89_020866	hypothetical protein IFM89_020866 [Coptis chinensis]
IFM89_029976	hypothetical protein IFM89_029976 [Coptis chinensis]
novel.2751	hypothetical protein Ahy_B03g067675 [Arachis hypogaea]
IFM89_030786	hypothetical protein IFM89_030786 [Coptis chinensis]
IFM89_026431	hypothetical protein IFM89_026431, partial [Coptis chinensis]
IFM89_002801	hypothetical protein IFM89_002801 [Coptis chinensis]
IFM89_033569	hypothetical protein IFM89_033569 [Coptis chinensis]
IFM89_006443	hypothetical protein IFM89_006443 [Coptis chinensis]
IFM89_016697	hypothetical protein IFM89_016697 [Coptis chinensis]
IFM89_028764	hypothetical protein IFM89_028764 [Coptis chinensis]
IFM89_031971	hypothetical protein IFM89_031971 [Coptis chinensis]
IFM89_019641	hypothetical protein IFM89_019641 [Coptis chinensis]
novel.3938	hypothetical protein E3N88_44467 [Mikania micrantha]
IFM89_023651	hypothetical protein IFM89_023651 [Coptis chinensis]
IFM89_012660	hypothetical protein IFM89_012660 [Coptis chinensis]
IFM89_023660	hypothetical protein IFM89_023660 [Coptis chinensis]
IFM89_003847	hypothetical protein IFM89_003847 [Coptis chinensis]
IFM89_030686	hypothetical protein IFM89_030686 [Coptis chinensis]
IFM89_002797	hypothetical protein IFM89_002797 [Coptis chinensis]
IFM89_003734	hypothetical protein IFM89_003734 [Coptis chinensis]
novel.3049	hypothetical protein AQUCO_01000388v1 [Aquilegia coerulea]
IFM89_007051	hypothetical protein IFM89_007051 [Coptis chinensis]
IFM89_030194	hypothetical protein IFM89_030194 [Coptis chinensis]
IFM89_035656	hypothetical protein IFM89_035656 [Coptis chinensis]
IFM89_034510	hypothetical protein IFM89_034510 [Coptis chinensis]
IFM89_011384	hypothetical protein IFM89_011384 [Coptis chinensis]
IFM89_031810	hypothetical protein IFM89_031810 [Coptis chinensis]
IFM89_032761	hypothetical protein IFM89_032761, partial [Coptis chinensis]
IFM89_020489	hypothetical protein IFM89_020489 [Coptis chinensis]
IFM89_002045	hypothetical protein IFM89_002045 [Coptis chinensis]
IFM89_002260	hypothetical protein IFM89_002260 [Coptis chinensis]
IFM89_031724	hypothetical protein IFM89_031724 [Coptis chinensis]
IFM89_023766	hypothetical protein IFM89_023766 [Coptis chinensis]
IFM89_024239	hypothetical protein IFM89_024239 [Coptis chinensis]
IFM89_006425	hypothetical protein IFM89_006425 [Coptis chinensis]
IFM89_020842	hypothetical protein IFM89_020842 [Coptis chinensis]
IFM89_007513	hypothetical protein IFM89_007513 [Coptis chinensis]
IFM89_027593	hypothetical protein IFM89_027593 [Coptis chinensis]
IFM89_032689	hypothetical protein IFM89_032689 [Coptis chinensis]
IFM89_038224	hypothetical protein IFM89_038224 [Coptis chinensis]
IFM89_016084	hypothetical protein IFM89_016084 [Coptis chinensis]
IFM89_025233	hypothetical protein IFM89_025233 [Coptis chinensis]
IFM89_005157	hypothetical protein IFM89_005157 [Coptis chinensis]
IFM89_037843	hypothetical protein IFM89_037843 [Coptis chinensis]
IFM89_026273	hypothetical protein IFM89_026273 [Coptis chinensis]
IFM89_002181	hypothetical protein IFM89_002181 [Coptis chinensis]
IFM89_035122	hypothetical protein IFM89_035122 [Coptis chinensis]
IFM89_029119	hypothetical protein IFM89_029119 [Coptis chinensis]
IFM89_006661	hypothetical protein IFM89_006661 [Coptis chinensis]
IFM89_036288	hypothetical protein IFM89_036288 [Coptis chinensis]
IFM89_034484	hypothetical protein IFM89_034484 [Coptis chinensis]
IFM89_033096	hypothetical protein IFM89_033096 [Coptis chinensis]
IFM89_009445	hypothetical protein IFM89_009445 [Coptis chinensis]
IFM89_015207	hypothetical protein IFM89_015207 [Coptis chinensis]
IFM89_020028	hypothetical protein IFM89_020028 [Coptis chinensis]
IFM89_024357	hypothetical protein IFM89_024357 [Coptis chinensis]
IFM89_012587	hypothetical protein IFM89_012587 [Coptis chinensis]
IFM89_013313	hypothetical protein IFM89_013313 [Coptis chinensis]
IFM89_008086	hypothetical protein IFM89_008086 [Coptis chinensis]
novel.8162	hypothetical protein AQUCO_01400852v1 [Aquilegia coerulea]
IFM89_001583	hypothetical protein IFM89_001583 [Coptis chinensis]
IFM89_011302	hypothetical protein IFM89_011302 [Coptis chinensis]
IFM89_013275	hypothetical protein IFM89_013275 [Coptis chinensis]
novel.2436	hypothetical protein IFM89_039848 [Coptis chinensis]
IFM89_009669	hypothetical protein IFM89_009669 [Coptis chinensis]
IFM89_006980	hypothetical protein IFM89_006980 [Coptis chinensis]
IFM89_026324	hypothetical protein IFM89_026324 [Coptis chinensis]
IFM89_032428	hypothetical protein IFM89_032428 [Coptis chinensis]
IFM89_027696	hypothetical protein IFM89_027696 [Coptis chinensis]
IFM89_012148	hypothetical protein IFM89_012148 [Coptis chinensis]
IFM89_003386	hypothetical protein IFM89_003386 [Coptis chinensis]
novel.2381	hypothetical protein IFM89_035728 [Coptis chinensis]
IFM89_004945	hypothetical protein IFM89_004945 [Coptis chinensis]
IFM89_028656	hypothetical protein IFM89_028656, partial [Coptis chinensis]
IFM89_021490	hypothetical protein IFM89_021490 [Coptis chinensis]
IFM89_000343	hypothetical protein IFM89_000343 [Coptis chinensis]
IFM89_001539	hypothetical protein IFM89_001539 [Coptis chinensis]
IFM89_039663	hypothetical protein IFM89_039663 [Coptis chinensis]
IFM89_003576	hypothetical protein IFM89_003576 [Coptis chinensis]
IFM89_026374	hypothetical protein IFM89_026374 [Coptis chinensis]
IFM89_037587	hypothetical protein IFM89_037587 [Coptis chinensis]
IFM89_013778	hypothetical protein IFM89_013778 [Coptis chinensis]
IFM89_032926	hypothetical protein IFM89_032926 [Coptis chinensis]
IFM89_037861	hypothetical protein IFM89_037861 [Coptis chinensis]
IFM89_005217	hypothetical protein IFM89_005217 [Coptis chinensis]
IFM89_018855	hypothetical protein IFM89_018855 [Coptis chinensis]
IFM89_032113	hypothetical protein IFM89_032113 [Coptis chinensis]
IFM89_011801	hypothetical protein IFM89_011801 [Coptis chinensis]
IFM89_002703	hypothetical protein IFM89_002703 [Coptis chinensis]
IFM89_008416	hypothetical protein IFM89_008416 [Coptis chinensis]
IFM89_012987	hypothetical protein IFM89_012987 [Coptis chinensis]
IFM89_013502	hypothetical protein IFM89_013502 [Coptis chinensis]
IFM89_016199	hypothetical protein IFM89_016199 [Coptis chinensis]
IFM89_035125	hypothetical protein IFM89_035125 [Coptis chinensis]
IFM89_015523	hypothetical protein IFM89_015523 [Coptis chinensis]
IFM89_012090	hypothetical protein IFM89_012090, partial [Coptis chinensis]
IFM89_003729	hypothetical protein IFM89_003729 [Coptis chinensis]
IFM89_013261	hypothetical protein IFM89_013261 [Coptis chinensis]
IFM89_035055	hypothetical protein IFM89_035055 [Coptis chinensis]
novel.1088	hypothetical protein IFM89_015942 [Coptis chinensis]
IFM89_037705	hypothetical protein IFM89_037705 [Coptis chinensis]
IFM89_001660	hypothetical protein IFM89_001660 [Coptis chinensis]
IFM89_032856	hypothetical protein IFM89_032856 [Coptis chinensis]
IFM89_033338	hypothetical protein IFM89_033338 [Coptis chinensis]
novel.4599	hypothetical protein IFM89_034935 [Coptis chinensis]
IFM89_019834	hypothetical protein IFM89_019834 [Coptis chinensis]
novel.7061	hypothetical protein IFM89_011851 [Coptis chinensis]
IFM89_022334	hypothetical protein IFM89_022334 [Coptis chinensis]
IFM89_022594	hypothetical protein IFM89_022594, partial [Coptis chinensis]
IFM89_018667	hypothetical protein IFM89_018667 [Coptis chinensis]
IFM89_013445	hypothetical protein IFM89_013445 [Coptis chinensis]
IFM89_016955	hypothetical protein IFM89_016955 [Coptis chinensis]
IFM89_007493	hypothetical protein IFM89_007493 [Coptis chinensis]
novel.4019	hypothetical protein IFM89_024992 [Coptis chinensis]
IFM89_013505	hypothetical protein IFM89_013505 [Coptis chinensis]
IFM89_012607	hypothetical protein IFM89_012607 [Coptis chinensis]
novel.505	uncharacterized protein LOC120003113 [Tripterygium wilfordii]
IFM89_009078	hypothetical protein IFM89_009078 [Coptis chinensis]
IFM89_000261	hypothetical protein IFM89_000261 [Coptis chinensis]
IFM89_033610	hypothetical protein IFM89_033610 [Coptis chinensis]
IFM89_003009	hypothetical protein IFM89_003009 [Coptis chinensis]
IFM89_039506	hypothetical protein IFM89_039506 [Coptis chinensis]
IFM89_005636	hypothetical protein IFM89_005636 [Coptis chinensis]
IFM89_001316	hypothetical protein IFM89_001316 [Coptis chinensis]
IFM89_021599	hypothetical protein IFM89_021599 [Coptis chinensis]
IFM89_033994	hypothetical protein IFM89_033994 [Coptis chinensis]
IFM89_034316	hypothetical protein IFM89_034316 [Coptis chinensis]
IFM89_015809	hypothetical protein IFM89_015809 [Coptis chinensis]
IFM89_032090	hypothetical protein IFM89_032090 [Coptis chinensis]
IFM89_017833	hypothetical protein IFM89_017833 [Coptis chinensis]
novel.8210	E3 ubiquitin-protein ligase rzf1 [Thalictrum thalictroides]
IFM89_025976	hypothetical protein IFM89_025976 [Coptis chinensis]
IFM89_031837	hypothetical protein IFM89_031837 [Coptis chinensis]
IFM89_038463	hypothetical protein IFM89_038463 [Coptis chinensis]
IFM89_011834	hypothetical protein IFM89_011834 [Coptis chinensis]
IFM89_004531	hypothetical protein IFM89_004531 [Coptis chinensis]
IFM89_036323	hypothetical protein IFM89_036323 [Coptis chinensis]
IFM89_023664	hypothetical protein IFM89_023664 [Coptis chinensis]
IFM89_036508	hypothetical protein IFM89_036508 [Coptis chinensis]
IFM89_017821	hypothetical protein IFM89_017821 [Coptis chinensis]
IFM89_007681	hypothetical protein IFM89_007681 [Coptis chinensis]
IFM89_010280	hypothetical protein IFM89_010280 [Coptis chinensis]
IFM89_005743	hypothetical protein IFM89_005743 [Coptis chinensis]
IFM89_024126	hypothetical protein IFM89_024126 [Coptis chinensis]
IFM89_001167	hypothetical protein IFM89_001167 [Coptis chinensis]
IFM89_008957	hypothetical protein IFM89_008957 [Coptis chinensis]
IFM89_000614	hypothetical protein IFM89_000614 [Coptis chinensis]
IFM89_013572	hypothetical protein IFM89_013572 [Coptis chinensis]
IFM89_018471	hypothetical protein IFM89_018471 [Coptis chinensis]
IFM89_038092	hypothetical protein IFM89_038092 [Coptis chinensis]
IFM89_005239	hypothetical protein IFM89_005239, partial [Coptis chinensis]
IFM89_028800	hypothetical protein IFM89_028800 [Coptis chinensis]
IFM89_034610	hypothetical protein IFM89_034610 [Coptis chinensis]
IFM89_005829	hypothetical protein IFM89_005829 [Coptis chinensis]
IFM89_029743	hypothetical protein IFM89_029743 [Coptis chinensis]
IFM89_011353	hypothetical protein IFM89_011353 [Coptis chinensis]
novel.5766	hypothetical protein FNV43_RR24782 [Rhamnella rubrinervis]
IFM89_002663	hypothetical protein IFM89_002663 [Coptis chinensis]
IFM89_023006	hypothetical protein IFM89_023006 [Coptis chinensis]
IFM89_007922	hypothetical protein AQUCO_04200058v1 [Aquilegia coerulea]
IFM89_004908	hypothetical protein IFM89_004908 [Coptis chinensis]
IFM89_037181	hypothetical protein IFM89_037181 [Coptis chinensis]
IFM89_022002	hypothetical protein IFM89_022002 [Coptis chinensis]
IFM89_006109	hypothetical protein IFM89_006109 [Coptis chinensis]
IFM89_039102	hypothetical protein IFM89_039102 [Coptis chinensis]
IFM89_016685	hypothetical protein IFM89_016685 [Coptis chinensis]
IFM89_000387	hypothetical protein IFM89_000387 [Coptis chinensis]
IFM89_037985	hypothetical protein IFM89_037985 [Coptis chinensis]
IFM89_025569	hypothetical protein IFM89_025569, partial [Coptis chinensis]
IFM89_000506	hypothetical protein IFM89_000506, partial [Coptis chinensis]
IFM89_015017	hypothetical protein IFM89_015017 [Coptis chinensis]
IFM89_002800	hypothetical protein IFM89_002800 [Coptis chinensis]
IFM89_012552	hypothetical protein IFM89_012552, partial [Coptis chinensis]
IFM89_021790	hypothetical protein IFM89_021790 [Coptis chinensis]
novel.8144	unnamed protein product, partial [Vitis vinifera]
IFM89_008166	hypothetical protein IFM89_008166 [Coptis chinensis]
IFM89_037698	hypothetical protein IFM89_037698 [Coptis chinensis]
IFM89_017984	hypothetical protein IFM89_017984 [Coptis chinensis]
IFM89_006828	hypothetical protein IFM89_006828 [Coptis chinensis]
novel.5081	hypothetical protein IFM89_017630 [Coptis chinensis]
IFM89_018724	hypothetical protein IFM89_018724 [Coptis chinensis]
IFM89_007623	hypothetical protein IFM89_007623 [Coptis chinensis]
novel.5628	hypothetical protein IFM89_013028 [Coptis chinensis]
IFM89_002155	hypothetical protein IFM89_002155 [Coptis chinensis]
IFM89_011673	hypothetical protein IFM89_011673 [Coptis chinensis]
IFM89_038631	hypothetical protein IFM89_038631 [Coptis chinensis]
IFM89_016403	hypothetical protein IFM89_016403 [Coptis chinensis]
IFM89_005286	hypothetical protein IFM89_005286 [Coptis chinensis]
IFM89_033908	hypothetical protein IFM89_033908 [Coptis chinensis]
IFM89_002001	hypothetical protein IFM89_002001 [Coptis chinensis]
IFM89_015237	hypothetical protein IFM89_015237, partial [Coptis chinensis]
novel.6860	hypothetical protein IFM89_035014 [Coptis chinensis]
IFM89_006728	hypothetical protein IFM89_006728 [Coptis chinensis]
IFM89_001289	hypothetical protein IFM89_001289 [Coptis chinensis]
IFM89_017655	hypothetical protein IFM89_017655 [Coptis chinensis]
IFM89_037118	hypothetical protein IFM89_037118 [Coptis chinensis]
IFM89_019192	hypothetical protein IFM89_019192 [Coptis chinensis]
IFM89_028155	hypothetical protein IFM89_028155 [Coptis chinensis]
IFM89_001628	hypothetical protein IFM89_001628 [Coptis chinensis]
IFM89_026409	hypothetical protein IFM89_026409 [Coptis chinensis]
IFM89_012802	hypothetical protein IFM89_012802 [Coptis chinensis]
IFM89_030679	hypothetical protein IFM89_030679 [Coptis chinensis]
IFM89_009200	hypothetical protein IFM89_009200 [Coptis chinensis]
IFM89_005737	hypothetical protein IFM89_005737 [Coptis chinensis]
IFM89_023483	hypothetical protein IFM89_023483 [Coptis chinensis]
IFM89_021631	hypothetical protein IFM89_021631 [Coptis chinensis]
novel.4057	hypothetical protein IFM89_006228 [Coptis chinensis]
IFM89_016204	hypothetical protein IFM89_016204 [Coptis chinensis]
novel.6141	mitochondrial pyruvate carrier 1 isoform X1 [Phoenix dactylifera]
IFM89_004670	hypothetical protein IFM89_004670 [Coptis chinensis]
IFM89_023154	hypothetical protein IFM89_023154 [Coptis chinensis]
IFM89_025120	hypothetical protein IFM89_025120 [Coptis chinensis]
IFM89_002891	hypothetical protein IFM89_002891 [Coptis chinensis]
novel.7931	transmembrane protein [Thalictrum thalictroides]
IFM89_002813	hypothetical protein IFM89_002813 [Coptis chinensis]
IFM89_018021	hypothetical protein IFM89_018021 [Coptis chinensis]
IFM89_027023	hypothetical protein IFM89_027023 [Coptis chinensis]
IFM89_005639	hypothetical protein IFM89_005639, partial [Coptis chinensis]
IFM89_005627	hypothetical protein IFM89_005627 [Coptis chinensis]
IFM89_036810	hypothetical protein IFM89_036810, partial [Coptis chinensis]
IFM89_021552	hypothetical protein IFM89_021552 [Coptis chinensis]
IFM89_037153	hypothetical protein IFM89_037153 [Coptis chinensis]
IFM89_008212	hypothetical protein IFM89_008212 [Coptis chinensis]
IFM89_007744	hypothetical protein IFM89_007744 [Coptis chinensis]
IFM89_023300	hypothetical protein IFM89_023300 [Coptis chinensis]
IFM89_003476	hypothetical protein IFM89_003476 [Coptis chinensis]
IFM89_021705	hypothetical protein IFM89_021705 [Coptis chinensis]
IFM89_024002	hypothetical protein IFM89_024002 [Coptis chinensis]
IFM89_018347	hypothetical protein IFM89_018347 [Coptis chinensis]
IFM89_023108	hypothetical protein IFM89_023108 [Coptis chinensis]
IFM89_011974	hypothetical protein IFM89_011974 [Coptis chinensis]
IFM89_018143	hypothetical protein IFM89_018143 [Coptis chinensis]
IFM89_039610	hypothetical protein IFM89_039610 [Coptis chinensis]
IFM89_012231	hypothetical protein IFM89_012231 [Coptis chinensis]
IFM89_006860	hypothetical protein IFM89_006860 [Coptis chinensis]
IFM89_034940	hypothetical protein IFM89_034940 [Coptis chinensis]
IFM89_038306	hypothetical protein IFM89_038306 [Coptis chinensis]
IFM89_032183	hypothetical protein IFM89_032183 [Coptis chinensis]
IFM89_018163	hypothetical protein IFM89_018163 [Coptis chinensis]
IFM89_001627	hypothetical protein IFM89_001627 [Coptis chinensis]
IFM89_038001	hypothetical protein IFM89_038001 [Coptis chinensis]
novel.4851	hypothetical protein IFM89_031069 [Coptis chinensis]
IFM89_028659	hypothetical protein IFM89_028659 [Coptis chinensis]
IFM89_035749	hypothetical protein IFM89_035749 [Coptis chinensis]
novel.8586	hypothetical protein AQUCO_00800081v1 [Aquilegia coerulea]
IFM89_020932	hypothetical protein IFM89_020932 [Coptis chinensis]
novel.8968	hypothetical protein IFM89_028950, partial [Coptis chinensis]
IFM89_012604	hypothetical protein IFM89_012604 [Coptis chinensis]
IFM89_001020	hypothetical protein IFM89_001020 [Coptis chinensis]
IFM89_025180	hypothetical protein IFM89_025180 [Coptis chinensis]
IFM89_003512	hypothetical protein IFM89_003512 [Coptis chinensis]
IFM89_030162	hypothetical protein IFM89_030162 [Coptis chinensis]
novel.6905	hypothetical protein IFM89_030582 [Coptis chinensis]
IFM89_014080	hypothetical protein IFM89_014080 [Coptis chinensis]
IFM89_021643	hypothetical protein IFM89_021643 [Coptis chinensis]
IFM89_005318	hypothetical protein IFM89_005318 [Coptis chinensis]
IFM89_037800	hypothetical protein IFM89_037800 [Coptis chinensis]
IFM89_017151	hypothetical protein IFM89_017151 [Coptis chinensis]
IFM89_025586	hypothetical protein IFM89_025586 [Coptis chinensis]
IFM89_037989	hypothetical protein IFM89_037989 [Coptis chinensis]
novel.6947	chloride channel protein CLC-c-like [Trifolium medium]
novel.4542	hypothetical protein AQUCO_03400300v1 [Aquilegia coerulea]
IFM89_007702	hypothetical protein IFM89_007702 [Coptis chinensis]
IFM89_015456	hypothetical protein IFM89_015456 [Coptis chinensis]
IFM89_026039	hypothetical protein IFM89_026039 [Coptis chinensis]
IFM89_003849	hypothetical protein IFM89_003849 [Coptis chinensis]
IFM89_033152	hypothetical protein IFM89_033152 [Coptis chinensis]
IFM89_038132	hypothetical protein IFM89_038132 [Coptis chinensis]
novel.8583	hypothetical protein [Papaver nudicaule]
IFM89_017062	hypothetical protein IFM89_017062 [Coptis chinensis]
IFM89_035290	hypothetical protein IFM89_035290 [Coptis chinensis]
IFM89_004603	hypothetical protein IFM89_004603 [Coptis chinensis]
IFM89_028313	hypothetical protein IFM89_028313 [Coptis chinensis]
IFM89_007725	hypothetical protein IFM89_007725 [Coptis chinensis]
IFM89_025193	hypothetical protein IFM89_025193 [Coptis chinensis]
IFM89_019072	hypothetical protein IFM89_019072, partial [Coptis chinensis]
IFM89_019304	hypothetical protein IFM89_019304 [Coptis chinensis]
IFM89_015265	hypothetical protein IFM89_015265 [Coptis chinensis]
IFM89_003418	hypothetical protein IFM89_003418 [Coptis chinensis]
IFM89_016291	hypothetical protein IFM89_016291 [Coptis chinensis]
IFM89_021324	hypothetical protein IFM89_021324 [Coptis chinensis]
IFM89_037169	hypothetical protein IFM89_037169 [Coptis chinensis]
IFM89_025593	hypothetical protein IFM89_025593 [Coptis chinensis]
IFM89_001612	hypothetical protein IFM89_001612 [Coptis chinensis]
IFM89_007820	hypothetical protein IFM89_007820 [Coptis chinensis]
IFM89_032139	hypothetical protein IFM89_032139 [Coptis chinensis]
IFM89_029944	hypothetical protein IFM89_029944 [Coptis chinensis]
IFM89_029442	hypothetical protein IFM89_029442 [Coptis chinensis]
IFM89_009885	hypothetical protein IFM89_009885 [Coptis chinensis]
IFM89_033205	hypothetical protein IFM89_033205 [Coptis chinensis]
IFM89_001759	hypothetical protein IFM89_001759 [Coptis chinensis]
IFM89_009415	hypothetical protein IFM89_009415 [Coptis chinensis]
IFM89_014811	hypothetical protein IFM89_014811 [Coptis chinensis]
IFM89_035312	hypothetical protein IFM89_035312 [Coptis chinensis]
IFM89_021944	hypothetical protein IFM89_021944 [Coptis chinensis]
IFM89_031850	hypothetical protein IFM89_031850 [Coptis chinensis]
novel.6013	hypothetical protein AQUCO_00900508v1 [Aquilegia coerulea]
novel.7423	hypothetical protein FRX31_023283 [Thalictrum thalictroides]
IFM89_023090	hypothetical protein IFM89_023090 [Coptis chinensis]
IFM89_004892	hypothetical protein IFM89_004892, partial [Coptis chinensis]
novel.8450	extensin-2-like, partial [Thalictrum thalictroides]
IFM89_025158	hypothetical protein IFM89_025158 [Coptis chinensis]
IFM89_021542	hypothetical protein IFM89_021542 [Coptis chinensis]
IFM89_036761	hypothetical protein IFM89_036761 [Coptis chinensis]
IFM89_025576	hypothetical protein IFM89_025576 [Coptis chinensis]
IFM89_011656	hypothetical protein IFM89_011656 [Coptis chinensis]
IFM89_031447	hypothetical protein IFM89_031447 [Coptis chinensis]
IFM89_033035	hypothetical protein IFM89_033035 [Coptis chinensis]
IFM89_013341	hypothetical protein IFM89_013341 [Coptis chinensis]
novel.8308	Gibberellin receptor gid1c [Thalictrum thalictroides]
IFM89_019048	hypothetical protein IFM89_019048 [Coptis chinensis]
IFM89_031657	hypothetical protein IFM89_031657 [Coptis chinensis]
IFM89_002379	hypothetical protein IFM89_002379 [Coptis chinensis]
IFM89_005637	hypothetical protein IFM89_005637 [Coptis chinensis]
IFM89_036209	hypothetical protein IFM89_036209 [Coptis chinensis]
IFM89_035333	hypothetical protein IFM89_035333 [Coptis chinensis]
IFM89_016769	hypothetical protein IFM89_016769 [Coptis chinensis]
IFM89_009916	hypothetical protein IFM89_009916 [Coptis chinensis]
IFM89_022579	hypothetical protein IFM89_022579 [Coptis chinensis]
IFM89_004060	hypothetical protein IFM89_004060 [Coptis chinensis]
IFM89_034253	hypothetical protein IFM89_034253 [Coptis chinensis]
IFM89_027941	hypothetical protein IFM89_027941 [Coptis chinensis]
IFM89_024427	hypothetical protein IFM89_024427 [Coptis chinensis]
IFM89_003393	hypothetical protein IFM89_003393 [Coptis chinensis]
IFM89_027024	hypothetical protein IFM89_027024 [Coptis chinensis]
IFM89_017316	hypothetical protein IFM89_017316 [Coptis chinensis]
IFM89_011821	hypothetical protein IFM89_011821 [Coptis chinensis]
IFM89_012820	hypothetical protein IFM89_012820, partial [Coptis chinensis]
IFM89_000357	hypothetical protein IFM89_000357 [Coptis chinensis]
IFM89_007941	hypothetical protein IFM89_007941 [Coptis chinensis]
IFM89_005782	hypothetical protein IFM89_005782 [Coptis chinensis]
IFM89_004837	hypothetical protein IFM89_004837 [Coptis chinensis]
IFM89_019587	hypothetical protein IFM89_019587 [Coptis chinensis]
IFM89_039117	hypothetical protein IFM89_039117 [Coptis chinensis]
IFM89_033387	hypothetical protein IFM89_033387 [Coptis chinensis]
IFM89_035475	hypothetical protein IFM89_035475 [Coptis chinensis]
novel.5218	hypothetical protein F0562_026584 [Nyssa sinensis]
IFM89_028666	hypothetical protein IFM89_028666 [Coptis chinensis]
IFM89_011075	hypothetical protein IFM89_011075 [Coptis chinensis]
IFM89_036662	hypothetical protein IFM89_036662 [Coptis chinensis]
IFM89_000726	hypothetical protein IFM89_000726 [Coptis chinensis]
IFM89_009579	hypothetical protein IFM89_009579 [Coptis chinensis]
IFM89_023463	hypothetical protein IFM89_023463 [Coptis chinensis]
IFM89_030879	hypothetical protein IFM89_030879 [Coptis chinensis]
IFM89_002338	hypothetical protein IFM89_002338 [Coptis chinensis]
IFM89_030221	hypothetical protein IFM89_030221 [Coptis chinensis]
IFM89_017321	hypothetical protein IFM89_017321 [Coptis chinensis]
IFM89_003041	PREDICTED: calmodulin [Nelumbo nucifera]
IFM89_006579	hypothetical protein IFM89_006579 [Coptis chinensis]
IFM89_007728	hypothetical protein IFM89_007728 [Coptis chinensis]
IFM89_019471	hypothetical protein IFM89_019471, partial [Coptis chinensis]
IFM89_029645	hypothetical protein IFM89_029645 [Coptis chinensis]
IFM89_029134	hypothetical protein IFM89_029134 [Coptis chinensis]
IFM89_037328	hypothetical protein IFM89_037328 [Coptis chinensis]
IFM89_001631	hypothetical protein IFM89_001631 [Coptis chinensis]
IFM89_032749	hypothetical protein IFM89_032749 [Coptis chinensis]
IFM89_019520	hypothetical protein IFM89_019520 [Coptis chinensis]
novel.3463	hypothetical protein L2E82_25547 [Cichorium intybus]
IFM89_035969	hypothetical protein IFM89_035969 [Coptis chinensis]
IFM89_004265	hypothetical protein IFM89_004265, partial [Coptis chinensis]
IFM89_012511	hypothetical protein IFM89_012511 [Coptis chinensis]
IFM89_005983	hypothetical protein IFM89_005983 [Coptis chinensis]
IFM89_004157	hypothetical protein IFM89_004157 [Coptis chinensis]
IFM89_002123	hypothetical protein IFM89_002123 [Coptis chinensis]
IFM89_038038	hypothetical protein IFM89_038038 [Coptis chinensis]
IFM89_034893	hypothetical protein IFM89_034893, partial [Coptis chinensis]
IFM89_019562	hypothetical protein IFM89_019562 [Coptis chinensis]
IFM89_030978	hypothetical protein IFM89_030978 [Coptis chinensis]
novel.8897	hypothetical protein IFM89_020994 [Coptis chinensis]
IFM89_005337	hypothetical protein IFM89_005337 [Coptis chinensis]
IFM89_002696	hypothetical protein IFM89_002696 [Coptis chinensis]
IFM89_018363	hypothetical protein IFM89_018363, partial [Coptis chinensis]
IFM89_005772	hypothetical protein IFM89_005772 [Coptis chinensis]
IFM89_012574	hypothetical protein IFM89_012574 [Coptis chinensis]
IFM89_032679	hypothetical protein IFM89_032679 [Coptis chinensis]
IFM89_022545	hypothetical protein IFM89_022545 [Coptis chinensis]
IFM89_008799	hypothetical protein IFM89_008799 [Coptis chinensis]
IFM89_009882	hypothetical protein IFM89_009882 [Coptis chinensis]
IFM89_034182	hypothetical protein IFM89_034182 [Coptis chinensis]
IFM89_034534	hypothetical protein IFM89_034534 [Coptis chinensis]
IFM89_007780	hypothetical protein IFM89_007780 [Coptis chinensis]
IFM89_012748	hypothetical protein IFM89_012748 [Coptis chinensis]
IFM89_003481	hypothetical protein IFM89_003481 [Coptis chinensis]
IFM89_000359	hypothetical protein IFM89_000359 [Coptis chinensis]
IFM89_005691	hypothetical protein IFM89_005691 [Coptis chinensis]
IFM89_004241	hypothetical protein IFM89_004241 [Coptis chinensis]
IFM89_005947	hypothetical protein IFM89_005947 [Coptis chinensis]
IFM89_012021	hypothetical protein IFM89_012021 [Coptis chinensis]
IFM89_029510	hypothetical protein IFM89_029510 [Coptis chinensis]
novel.4612	Imidazolonepropionase [Nymphaea thermarum]
IFM89_035666	hypothetical protein IFM89_035666 [Coptis chinensis]
IFM89_026366	hypothetical protein IFM89_026366 [Coptis chinensis]
IFM89_007505	hypothetical protein IFM89_007505 [Coptis chinensis]
novel.8111	hypothetical protein AQUCO_13300023v1 [Aquilegia coerulea]
IFM89_030656	hypothetical protein IFM89_030656 [Coptis chinensis]
IFM89_030236	hypothetical protein IFM89_030236 [Coptis chinensis]
IFM89_022614	hypothetical protein IFM89_022614 [Coptis chinensis]
novel.8410	hypothetical protein IFM89_034906 [Coptis chinensis]
IFM89_007703	hypothetical protein IFM89_007703 [Coptis chinensis]
IFM89_030522	hypothetical protein IFM89_030522 [Coptis chinensis]
novel.383	hypothetical protein AQUCO_03400349v1 [Aquilegia coerulea]
IFM89_026598	hypothetical protein IFM89_026598 [Coptis chinensis]
IFM89_005728	hypothetical protein IFM89_005728 [Coptis chinensis]
IFM89_017726	hypothetical protein IFM89_017726 [Coptis chinensis]
IFM89_000142	hypothetical protein IFM89_000142 [Coptis chinensis]
IFM89_028777	hypothetical protein IFM89_028777 [Coptis chinensis]
IFM89_029506	hypothetical protein IFM89_029506 [Coptis chinensis]
IFM89_014413	hypothetical protein IFM89_014413 [Coptis chinensis]
IFM89_018592	hypothetical protein IFM89_018592 [Coptis chinensis]
IFM89_024165	hypothetical protein IFM89_024165 [Coptis chinensis]
novel.8287	hypothetical protein AQUCO_00901090v1 [Aquilegia coerulea]
IFM89_011833	hypothetical protein IFM89_011833 [Coptis chinensis]
IFM89_001725	hypothetical protein IFM89_001725 [Coptis chinensis]
novel.3123	hypothetical protein IFM89_016991 [Coptis chinensis]
IFM89_037098	hypothetical protein IFM89_037098 [Coptis chinensis]
IFM89_036511	hypothetical protein IFM89_036511 [Coptis chinensis]
IFM89_003673	hypothetical protein IFM89_003673 [Coptis chinensis]
IFM89_017278	hypothetical protein IFM89_017278 [Coptis chinensis]
IFM89_023121	6-O-methyltransferase 1, partial [Coptis chinensis]
IFM89_034301	hypothetical protein IFM89_034301 [Coptis chinensis]
IFM89_038321	hypothetical protein IFM89_038321 [Coptis chinensis]
IFM89_004300	hypothetical protein IFM89_004300 [Coptis chinensis]
IFM89_016736	hypothetical protein IFM89_016736 [Coptis chinensis]
IFM89_014099	hypothetical protein IFM89_014099 [Coptis chinensis]
IFM89_032158	hypothetical protein IFM89_032158 [Coptis chinensis]
IFM89_025032	hypothetical protein IFM89_025032, partial [Coptis chinensis]
IFM89_018113	hypothetical protein IFM89_018113 [Coptis chinensis]
IFM89_033446	hypothetical protein IFM89_033446 [Coptis chinensis]
IFM89_024986	hypothetical protein IFM89_024986, partial [Coptis chinensis]
IFM89_016607	hypothetical protein IFM89_016607 [Coptis chinensis]
novel.8221	Zinc finger ccch domain-containing protein [Thalictrum thalictroides]
IFM89_017489	hypothetical protein IFM89_017489 [Coptis chinensis]
IFM89_039733	hypothetical protein IFM89_039733 [Coptis chinensis]
IFM89_006153	hypothetical protein IFM89_006153 [Coptis chinensis]
IFM89_025225	hypothetical protein IFM89_025225 [Coptis chinensis]
IFM89_036267	hypothetical protein IFM89_036267 [Coptis chinensis]
IFM89_001844	hypothetical protein IFM89_001844 [Coptis chinensis]
IFM89_007707	hypothetical protein IFM89_007707 [Coptis chinensis]
IFM89_012699	hypothetical protein IFM89_012699 [Coptis chinensis]
novel.5879	ATP-dependent DNA helicase PIF1-like [Coffea arabica]
IFM89_018119	hypothetical protein IFM89_018119 [Coptis chinensis]
IFM89_033851	hypothetical protein IFM89_033851 [Coptis chinensis]
IFM89_000781	hypothetical protein IFM89_000781 [Coptis chinensis]
IFM89_038285	hypothetical protein IFM89_038285 [Coptis chinensis]
IFM89_002009	hypothetical protein IFM89_002009 [Coptis chinensis]
IFM89_023735	hypothetical protein IFM89_023735 [Coptis chinensis]
IFM89_031188	hypothetical protein IFM89_031188 [Coptis chinensis]
IFM89_033572	hypothetical protein IFM89_033572 [Coptis chinensis]
novel.7006	hypothetical protein IFM89_037025 [Coptis chinensis]
IFM89_017480	hypothetical protein IFM89_017480, partial [Coptis chinensis]
IFM89_028665	hypothetical protein IFM89_028665 [Coptis chinensis]
IFM89_035229	hypothetical protein IFM89_035229 [Coptis chinensis]
IFM89_018410	hypothetical protein IFM89_018410 [Coptis chinensis]
IFM89_022526	hypothetical protein IFM89_022526 [Coptis chinensis]
IFM89_028875	hypothetical protein IFM89_028875 [Coptis chinensis]
IFM89_017497	hypothetical protein IFM89_017497 [Coptis chinensis]
IFM89_034163	hypothetical protein IFM89_034163 [Coptis chinensis]
novel.8621	serine/arginine-rich splicing factor SC35-like isoform X1 [Senna tora]
novel.4758	hypothetical protein AQUCO_03800176v1 [Aquilegia coerulea]
novel.8451	leucine-rich repeat extensin-like protein 1, partial [Papaver somniferum]
IFM89_025054	hypothetical protein IFM89_025054 [Coptis chinensis]
IFM89_005437	hypothetical protein IFM89_005437 [Coptis chinensis]
IFM89_035986	hypothetical protein IFM89_035986 [Coptis chinensis]
IFM89_035515	MYB transcription factor, partial [Coptis chinensis]
novel.4814	Ralf-like [Thalictrum thalictroides]
IFM89_037931	hypothetical protein IFM89_037931 [Coptis chinensis]
novel.8473	Transcription factor bhlh [Thalictrum thalictroides]
IFM89_018202	hypothetical protein IFM89_018202 [Coptis chinensis]
IFM89_010212	hypothetical protein IFM89_010212, partial [Coptis chinensis]
IFM89_031948	hypothetical protein IFM89_031948 [Coptis chinensis]
IFM89_026276	hypothetical protein IFM89_026276 [Coptis chinensis]
IFM89_037480	hypothetical protein IFM89_037480 [Coptis chinensis]
IFM89_028156	hypothetical protein IFM89_028156 [Coptis chinensis]
IFM89_017070	hypothetical protein IFM89_017070 [Coptis chinensis]
IFM89_011582	hypothetical protein IFM89_011582 [Coptis chinensis]
IFM89_017305	hypothetical protein IFM89_017305 [Coptis chinensis]
IFM89_012447	histone H4 [Vibrio parahaemolyticus]
IFM89_011015	hypothetical protein IFM89_011015 [Coptis chinensis]
IFM89_004788	hypothetical protein IFM89_004788 [Coptis chinensis]
IFM89_009825	hypothetical protein IFM89_009825 [Coptis chinensis]
novel.5164	Pentatricopeptide repeat-containing protein, partial [Thalictrum thalictroides]
IFM89_020205	hypothetical protein IFM89_020205 [Coptis chinensis]
IFM89_033850	hypothetical protein IFM89_033850 [Coptis chinensis]
novel.1660	hypothetical protein IFM89_019929 [Coptis chinensis]
IFM89_036794	hypothetical protein IFM89_036794, partial [Coptis chinensis]
IFM89_012474	hypothetical protein IFM89_012474, partial [Coptis chinensis]
IFM89_023655	hypothetical protein IFM89_023655 [Coptis chinensis]
IFM89_011562	hypothetical protein IFM89_011562 [Coptis chinensis]
IFM89_009651	hypothetical protein IFM89_009651 [Coptis chinensis]
IFM89_002660	hypothetical protein IFM89_002660 [Coptis chinensis]
IFM89_039080	hypothetical protein IFM89_039080 [Coptis chinensis]
IFM89_002765	hypothetical protein IFM89_002765 [Coptis chinensis]
IFM89_019959	hypothetical protein IFM89_019959 [Coptis chinensis]
IFM89_012872	hypothetical protein IFM89_012872 [Coptis chinensis]
IFM89_023105	hypothetical protein IFM89_023105 [Coptis chinensis]
IFM89_036181	hypothetical protein IFM89_036181 [Coptis chinensis]
IFM89_018204	hypothetical protein IFM89_018204 [Coptis chinensis]
novel.4504	hypothetical protein IFM89_028335 [Coptis chinensis]
novel.4732	hypothetical protein IFM89_036071 [Coptis chinensis]
IFM89_033176	hypothetical protein IFM89_033176 [Coptis chinensis]
IFM89_003063	hypothetical protein IFM89_003063 [Coptis chinensis]
IFM89_009098	hypothetical protein IFM89_009098 [Coptis chinensis]
IFM89_038891	hypothetical protein IFM89_038891 [Coptis chinensis]
IFM89_034550	hypothetical protein IFM89_034550 [Coptis chinensis]
IFM89_008774	hypothetical protein CDL15_Pgr002787 [Punica granatum]
IFM89_028517	hypothetical protein IFM89_028517 [Coptis chinensis]
IFM89_032562	hypothetical protein IFM89_032562 [Coptis chinensis]
IFM89_022657	hypothetical protein IFM89_022657 [Coptis chinensis]
IFM89_034856	hypothetical protein IFM89_034856 [Coptis chinensis]
novel.4723	hypothetical protein IFM89_023350 [Coptis chinensis]
IFM89_010509	hypothetical protein IFM89_010509 [Coptis chinensis]
IFM89_035910	hypothetical protein IFM89_012080 [Coptis chinensis]
IFM89_006330	hypothetical protein IFM89_006330 [Coptis chinensis]
IFM89_007697	hypothetical protein IFM89_007697 [Coptis chinensis]
IFM89_008469	hypothetical protein IFM89_008469 [Coptis chinensis]
IFM89_013281	hypothetical protein IFM89_013281 [Coptis chinensis]
IFM89_018685	hypothetical protein IFM89_018685 [Coptis chinensis]
IFM89_007465	hypothetical protein IFM89_007465 [Coptis chinensis]
IFM89_016650	hypothetical protein IFM89_016650 [Coptis chinensis]
IFM89_030901	hypothetical protein IFM89_030901 [Coptis chinensis]
IFM89_010977	hypothetical protein IFM89_010977 [Coptis chinensis]
IFM89_012099	hypothetical protein IFM89_012099 [Coptis chinensis]
IFM89_018561	hypothetical protein IFM89_018561 [Coptis chinensis]
IFM89_004283	hypothetical protein IFM89_004283 [Coptis chinensis]
IFM89_029829	hypothetical protein IFM89_029829 [Coptis chinensis]
IFM89_027405	hypothetical protein IFM89_027405 [Coptis chinensis]
IFM89_002928	hypothetical protein IFM89_002928 [Coptis chinensis]
novel.1345	hypothetical protein IFM89_031847, partial [Coptis chinensis]
IFM89_015613	hypothetical protein IFM89_015613 [Coptis chinensis]
IFM89_021347	hypothetical protein IFM89_021347 [Coptis chinensis]
IFM89_017856	hypothetical protein IFM89_017856 [Coptis chinensis]
IFM89_033550	hypothetical protein IFM89_033550 [Coptis chinensis]
IFM89_028147	hypothetical protein IFM89_028147 [Coptis chinensis]
IFM89_034405	hypothetical protein IFM89_034405 [Coptis chinensis]
IFM89_037048	Atp-dependent rna helicase-like protein db10 [Thalictrum thalictroides]
IFM89_014139	hypothetical protein IFM89_014139 [Coptis chinensis]
IFM89_006647	hypothetical protein IFM89_006647 [Coptis chinensis]
IFM89_020252	hypothetical protein IFM89_020252 [Coptis chinensis]
IFM89_036195	hypothetical protein IFM89_036195 [Coptis chinensis]
IFM89_028862	hypothetical protein IFM89_028862, partial [Coptis chinensis]
IFM89_017727	hypothetical protein IFM89_017727 [Coptis chinensis]
novel.8480	PWWP domain [Macleaya cordata]
IFM89_038214	hypothetical protein IFM89_038214 [Coptis chinensis]
IFM89_016469	hypothetical protein IFM89_016469 [Coptis chinensis]
IFM89_018346	hypothetical protein IFM89_018346 [Coptis chinensis]
IFM89_034775	hypothetical protein IFM89_034775 [Coptis chinensis]
IFM89_015015	hypothetical protein IFM89_015015 [Coptis chinensis]
IFM89_015064	hypothetical protein IFM89_015064 [Coptis chinensis]
IFM89_028401	hypothetical protein IFM89_028401 [Coptis chinensis]
IFM89_024554	hypothetical protein IFM89_024554 [Coptis chinensis]
IFM89_028953	hypothetical protein IFM89_028953, partial [Coptis chinensis]
IFM89_005781	hypothetical protein IFM89_005781 [Coptis chinensis]
IFM89_011869	hypothetical protein IFM89_011869 [Coptis chinensis]
novel.6607	hypothetical protein IFM89_008306 [Coptis chinensis]
novel.655	hypothetical protein IFM89_002302 [Coptis chinensis]
IFM89_029071	hypothetical protein IFM89_029071 [Coptis chinensis]
IFM89_002103	hypothetical protein IFM89_002103 [Coptis chinensis]
IFM89_035504	hypothetical protein IFM89_035504 [Coptis chinensis]
IFM89_004583	hypothetical protein IFM89_004583 [Coptis chinensis]
IFM89_039279	hypothetical protein IFM89_039279 [Coptis chinensis]
IFM89_004145	hypothetical protein IFM89_004145 [Coptis chinensis]
IFM89_035004	hypothetical protein IFM89_035004 [Coptis chinensis]
IFM89_018184	hypothetical protein IFM89_018184 [Coptis chinensis]
novel.8271	Glycoside hydrolase superfamily [Arabidopsis suecica]
IFM89_010578	hypothetical protein IFM89_010578 [Coptis chinensis]
IFM89_034430	hypothetical protein IFM89_034430 [Coptis chinensis]
IFM89_021595	hypothetical protein IFM89_021595 [Coptis chinensis]
IFM89_022042	hypothetical protein IFM89_022042 [Coptis chinensis]
IFM89_022769	hypothetical protein IFM89_022769 [Coptis chinensis]
IFM89_038068	hypothetical protein IFM89_038068 [Coptis chinensis]
IFM89_027685	hypothetical protein IFM89_027685 [Coptis chinensis]
IFM89_008070	hypothetical protein IFM89_008070 [Coptis chinensis]
novel.778	hypothetical protein BVC80_1831g158 [Macleaya cordata]
IFM89_012276	hypothetical protein IFM89_012276 [Coptis chinensis]
IFM89_024760	hypothetical protein IFM89_024760 [Coptis chinensis]
IFM89_012646	hypothetical protein IFM89_012646 [Coptis chinensis]
IFM89_034005	hypothetical protein IFM89_034005 [Coptis chinensis]
IFM89_021439	hypothetical protein IFM89_021439 [Coptis chinensis]
IFM89_008936	hypothetical protein IFM89_008936 [Coptis chinensis]
IFM89_018939	hypothetical protein IFM89_018939 [Coptis chinensis]
novel.8001	hypothetical protein IFM89_025828 [Coptis chinensis]
IFM89_006714	hypothetical protein IFM89_006714 [Coptis chinensis]
IFM89_005973	hypothetical protein IFM89_005973 [Coptis chinensis]
novel.3586	hypothetical protein IFM89_034281 [Coptis chinensis]
IFM89_005233	hypothetical protein IFM89_005233 [Coptis chinensis]
IFM89_008183	hypothetical protein IFM89_008183 [Coptis chinensis]
novel.8389	hypothetical protein B296_00018649 [Ensete ventricosum]
IFM89_020994	hypothetical protein IFM89_020994 [Coptis chinensis]
IFM89_012041	hypothetical protein IFM89_012041 [Coptis chinensis]
IFM89_017008	hypothetical protein IFM89_017008 [Coptis chinensis]
IFM89_023688	hypothetical protein IFM89_023688 [Coptis chinensis]
IFM89_004946	hypothetical protein IFM89_004946 [Coptis chinensis]
IFM89_011467	hypothetical protein IFM89_011467 [Coptis chinensis]
IFM89_019797	hypothetical protein IFM89_019797 [Coptis chinensis]
IFM89_010980	hypothetical protein IFM89_010980 [Coptis chinensis]
IFM89_016727	hypothetical protein IFM89_016727 [Coptis chinensis]
IFM89_016695	hypothetical protein IFM89_016695 [Coptis chinensis]
IFM89_006164	hypothetical protein IFM89_006164 [Coptis chinensis]
IFM89_038340	hypothetical protein IFM89_038340 [Coptis chinensis]
IFM89_005219	hypothetical protein IFM89_005219 [Coptis chinensis]
IFM89_024850	hypothetical protein IFM89_024850 [Coptis chinensis]
IFM89_035085	hypothetical protein AQUCO_01300426v1 [Aquilegia coerulea]
IFM89_014291	hypothetical protein IFM89_014291 [Coptis chinensis]
IFM89_023244	hypothetical protein IFM89_023244 [Coptis chinensis]
IFM89_016425	hypothetical protein IFM89_016425 [Coptis chinensis]
IFM89_039384	hypothetical protein IFM89_039384 [Coptis chinensis]
IFM89_036064	hypothetical protein IFM89_036064 [Coptis chinensis]
IFM89_022059	hypothetical protein IFM89_022059 [Coptis chinensis]
IFM89_024527	hypothetical protein IFM89_024527 [Coptis chinensis]
IFM89_027332	hypothetical protein IFM89_027332 [Coptis chinensis]
novel.7993	hypothetical protein IFM89_004342 [Coptis chinensis]
IFM89_020140	hypothetical protein IFM89_020140 [Coptis chinensis]
IFM89_036711	hypothetical protein IFM89_036711 [Coptis chinensis]
IFM89_021996	hypothetical protein IFM89_021996, partial [Coptis chinensis]
IFM89_000197	hypothetical protein IFM89_000197 [Coptis chinensis]
IFM89_003473	hypothetical protein IFM89_003473 [Coptis chinensis]
IFM89_000853	hypothetical protein IFM89_000853 [Coptis chinensis]
novel.7945	hypothetical protein IFM89_032328 [Coptis chinensis]
IFM89_021429	hypothetical protein IFM89_021429 [Coptis chinensis]
IFM89_008001	hypothetical protein IFM89_008001 [Coptis chinensis]
IFM89_017168	hypothetical protein IFM89_017168 [Coptis chinensis]
IFM89_018828	hypothetical protein IFM89_018828 [Coptis chinensis]
IFM89_002430	hypothetical protein IFM89_002430 [Coptis chinensis]
IFM89_000842	hypothetical protein IFM89_000842 [Coptis chinensis]
IFM89_017087	hypothetical protein IFM89_017087 [Coptis chinensis]
IFM89_034539	hypothetical protein IFM89_034539 [Coptis chinensis]
IFM89_025955	hypothetical protein IFM89_025955 [Coptis chinensis]
IFM89_019699	hypothetical protein IFM89_019699 [Coptis chinensis]
novel.8692	hypothetical protein AQUCO_01300008v1 [Aquilegia coerulea]
IFM89_020279	hypothetical protein IFM89_017755 [Coptis chinensis]
IFM89_014967	hypothetical protein IFM89_014967 [Coptis chinensis]
IFM89_038472	hypothetical protein IFM89_038472 [Coptis chinensis]
IFM89_036989	hypothetical protein IFM89_036989 [Coptis chinensis]
novel.2403	hypothetical protein POTOM_043275 [Populus tomentosa]
IFM89_017893	hypothetical protein IFM89_017893 [Coptis chinensis]
IFM89_017642	hypothetical protein IFM89_017642 [Coptis chinensis]
IFM89_027922	hypothetical protein IFM89_027922 [Coptis chinensis]
IFM89_014907	hypothetical protein IFM89_014907 [Coptis chinensis]
IFM89_018420	hypothetical protein IFM89_018420 [Coptis chinensis]
IFM89_005037	hypothetical protein IFM89_005037 [Coptis chinensis]
IFM89_029616	hypothetical protein IFM89_029616 [Coptis chinensis]
IFM89_019603	hypothetical protein IFM89_019603 [Coptis chinensis]
IFM89_015857	hypothetical protein IFM89_015857 [Coptis chinensis]
IFM89_017706	hypothetical protein IFM89_017706 [Coptis chinensis]
IFM89_024206	hypothetical protein IFM89_024206 [Coptis chinensis]
IFM89_026128	hypothetical protein IFM89_026128 [Coptis chinensis]
IFM89_000482	hypothetical protein IFM89_000482 [Coptis chinensis]
IFM89_000977	hypothetical protein IFM89_000977 [Coptis chinensis]
IFM89_021913	hypothetical protein IFM89_021913 [Coptis chinensis]
IFM89_015056	hypothetical protein IFM89_015056, partial [Coptis chinensis]
IFM89_025181	hypothetical protein IFM89_025181 [Coptis chinensis]
IFM89_027588	hypothetical protein IFM89_027588 [Coptis chinensis]
IFM89_017744	hypothetical protein IFM89_017744 [Coptis chinensis]
IFM89_023956	hypothetical protein IFM89_023956 [Coptis chinensis]
IFM89_025486	hypothetical protein IFM89_025486 [Coptis chinensis]
IFM89_039883	hypothetical protein IFM89_039883 [Coptis chinensis]
IFM89_019958	hypothetical protein IFM89_019958 [Coptis chinensis]
IFM89_029765	hypothetical protein IFM89_029765 [Coptis chinensis]
IFM89_028046	hypothetical protein IFM89_028046 [Coptis chinensis]
IFM89_029491	hypothetical protein IFM89_029491 [Coptis chinensis]
IFM89_031362	hypothetical protein IFM89_031362 [Coptis chinensis]
IFM89_002216	hypothetical protein IFM89_002216 [Coptis chinensis]
IFM89_032358	hypothetical protein IFM89_032358 [Coptis chinensis]
IFM89_028493	hypothetical protein IFM89_028493 [Coptis chinensis]
IFM89_036388	hypothetical protein IFM89_036388 [Coptis chinensis]
IFM89_003477	hypothetical protein IFM89_003477 [Coptis chinensis]
IFM89_031449	hypothetical protein IFM89_031449 [Coptis chinensis]
IFM89_032621	hypothetical protein IFM89_032621 [Coptis chinensis]
IFM89_008135	hypothetical protein IFM89_008135 [Coptis chinensis]
novel.5968	hypothetical protein MKX01_039626 [Papaver californicum]
IFM89_022394	hypothetical protein IFM89_022394 [Coptis chinensis]
IFM89_030899	hypothetical protein IFM89_030899 [Coptis chinensis]
IFM89_003157	hypothetical protein IFM89_003157 [Coptis chinensis]
IFM89_024081	hypothetical protein IFM89_024081 [Coptis chinensis]
IFM89_012679	hypothetical protein IFM89_012679 [Coptis chinensis]
IFM89_028379	hypothetical protein IFM89_028379, partial [Coptis chinensis]
IFM89_025887	hypothetical protein IFM89_025887 [Coptis chinensis]
IFM89_037084	hypothetical protein IFM89_037084 [Coptis chinensis]
IFM89_028473	hypothetical protein IFM89_028473 [Coptis chinensis]
IFM89_038635	hypothetical protein IFM89_038635 [Coptis chinensis]
IFM89_035694	hypothetical protein IFM89_035694 [Coptis chinensis]
IFM89_032873	hypothetical protein IFM89_032873 [Coptis chinensis]
IFM89_013632	hypothetical protein IFM89_013632 [Coptis chinensis]
IFM89_006133	hypothetical protein IFM89_006133 [Coptis chinensis]
IFM89_024273	hypothetical protein IFM89_024273 [Coptis chinensis]
IFM89_010142	hypothetical protein IFM89_010142 [Coptis chinensis]
IFM89_022087	hypothetical protein IFM89_022087 [Coptis chinensis]
IFM89_009935	hypothetical protein IFM89_009935 [Coptis chinensis]
IFM89_035777	hypothetical protein IFM89_035777 [Coptis chinensis]
IFM89_015292	hypothetical protein IFM89_015292 [Coptis chinensis]
IFM89_015947	hypothetical protein IFM89_015947 [Coptis chinensis]
IFM89_023538	hypothetical protein IFM89_023538 [Coptis chinensis]
IFM89_022359	hypothetical protein IFM89_022359 [Coptis chinensis]
IFM89_003079	hypothetical protein IFM89_003079 [Coptis chinensis]
IFM89_015471	hypothetical protein IFM89_015471 [Coptis chinensis]
IFM89_015455	hypothetical protein IFM89_015455 [Coptis chinensis]
IFM89_013501	hypothetical protein IFM89_013501 [Coptis chinensis]
IFM89_001246	hypothetical protein IFM89_001246 [Coptis chinensis]
novel.6536	hypothetical protein IFM89_031635 [Coptis chinensis]
IFM89_013226	hypothetical protein IFM89_013226 [Coptis chinensis]
IFM89_023849	hypothetical protein IFM89_023849 [Coptis chinensis]
IFM89_019387	hypothetical protein IFM89_019387 [Coptis chinensis]
IFM89_014433	hypothetical protein IFM89_014433 [Coptis chinensis]
IFM89_009544	hypothetical protein IFM89_009544 [Coptis chinensis]
IFM89_021689	hypothetical protein IFM89_021689 [Coptis chinensis]
novel.8281	PREDICTED: G patch domain and ankyrin repeat-containing protein 1 homolog [Nelumbo nucifera]
novel.3923	hypothetical protein IFM89_003163 [Coptis chinensis]
IFM89_027904	hypothetical protein IFM89_027904 [Coptis chinensis]
IFM89_010483	hypothetical protein IFM89_010483 [Coptis chinensis]
novel.8909	hypothetical protein IFM89_038055 [Coptis chinensis]
IFM89_011831	hypothetical protein IFM89_011831 [Coptis chinensis]
IFM89_012322	hypothetical protein IFM89_012322 [Coptis chinensis]
IFM89_031703	hypothetical protein IFM89_031703 [Coptis chinensis]
IFM89_017136	hypothetical protein IFM89_017136 [Coptis chinensis]
novel.8310	smr (Small MutS Related) domain-containing protein [Thalictrum thalictroides]
IFM89_034605	hypothetical protein IFM89_034605, partial [Coptis chinensis]
IFM89_033577	hypothetical protein IFM89_033577 [Coptis chinensis]
IFM89_034196	hypothetical protein IFM89_034196 [Coptis chinensis]
IFM89_015984	hypothetical protein IFM89_015984 [Coptis chinensis]
IFM89_023082	hypothetical protein IFM89_023082 [Coptis chinensis]
IFM89_021832	hypothetical protein IFM89_021832 [Coptis chinensis]
IFM89_029637	hypothetical protein IFM89_029637 [Coptis chinensis]
IFM89_038130	hypothetical protein IFM89_038130 [Coptis chinensis]
IFM89_030232	hypothetical protein IFM89_030232 [Coptis chinensis]
IFM89_005390	hypothetical protein IFM89_005390 [Coptis chinensis]
IFM89_020960	hypothetical protein IFM89_020960 [Coptis chinensis]
IFM89_014890	hypothetical protein IFM89_014890 [Coptis chinensis]
IFM89_034949	hypothetical protein IFM89_034949 [Coptis chinensis]
IFM89_014909	hypothetical protein IFM89_014909 [Coptis chinensis]
IFM89_022005	hypothetical protein IFM89_022005 [Coptis chinensis]
IFM89_034447	hypothetical protein IFM89_034447 [Coptis chinensis]
IFM89_023698	hypothetical protein IFM89_023698 [Coptis chinensis]
IFM89_035319	hypothetical protein IFM89_035319 [Coptis chinensis]
IFM89_017332	hypothetical protein IFM89_017332 [Coptis chinensis]
IFM89_012661	hypothetical protein IFM89_012661 [Coptis chinensis]
IFM89_009248	hypothetical protein IFM89_009248 [Coptis chinensis]
novel.7781	hypothetical protein IFM89_005672 [Coptis chinensis]
IFM89_012794	hypothetical protein IFM89_012794 [Coptis chinensis]
IFM89_010524	hypothetical protein IFM89_010524 [Coptis chinensis]
novel.7059	26S proteasome non-ATPase regulatory subunit, partial [Quercus aquifolioides]
novel.280	hypothetical protein IFM89_013298 [Coptis chinensis]
IFM89_003670	hypothetical protein IFM89_003670 [Coptis chinensis]
IFM89_002814	hypothetical protein IFM89_002814 [Coptis chinensis]
IFM89_037624	hypothetical protein IFM89_037624 [Coptis chinensis]
IFM89_038128	hypothetical protein IFM89_038128 [Coptis chinensis]
IFM89_025485	hypothetical protein IFM89_025485 [Coptis chinensis]
IFM89_038297	hypothetical protein IFM89_038297 [Coptis chinensis]
IFM89_027967	hypothetical protein IFM89_027967 [Coptis chinensis]
IFM89_004919	hypothetical protein IFM89_004919 [Coptis chinensis]
IFM89_008004	hypothetical protein IFM89_008004, partial [Coptis chinensis]
IFM89_011459	hypothetical protein IFM89_011459 [Coptis chinensis]
IFM89_023256	hypothetical protein IFM89_023256 [Coptis chinensis]
IFM89_023494	hypothetical protein IFM89_023494 [Coptis chinensis]
IFM89_033118	hypothetical protein IFM89_033118 [Coptis chinensis]
IFM89_031301	hypothetical protein IFM89_031301 [Coptis chinensis]
IFM89_011088	hypothetical protein IFM89_011088 [Coptis chinensis]
IFM89_020999	hypothetical protein IFM89_020999 [Coptis chinensis]
IFM89_022662	hypothetical protein IFM89_022662 [Coptis chinensis]
IFM89_021392	hypothetical protein IFM89_021392 [Coptis chinensis]
IFM89_034422	hypothetical protein IFM89_034422 [Coptis chinensis]
IFM89_037108	hypothetical protein IFM89_037108 [Coptis chinensis]
IFM89_039960	hypothetical protein IFM89_039960 [Coptis chinensis]
novel.8453	Vesicle transport protein GOT1 [Cucurbita argyrosperma subsp. argyrosperma]
IFM89_031472	hypothetical protein IFM89_031472 [Coptis chinensis]
IFM89_009914	hypothetical protein IFM89_009914 [Coptis chinensis]
IFM89_000130	hypothetical protein IFM89_000130 [Coptis chinensis]
IFM89_000793	hypothetical protein IFM89_000793 [Coptis chinensis]
IFM89_035088	hypothetical protein IFM89_035088 [Coptis chinensis]
IFM89_015107	hypothetical protein IFM89_015107 [Coptis chinensis]
IFM89_003456	hypothetical protein IFM89_003456 [Coptis chinensis]
IFM89_028355	hypothetical protein IFM89_028355 [Coptis chinensis]
IFM89_008268	Casein kinase i [Thalictrum thalictroides]
novel.6471	hypothetical protein FRX31_009511 [Thalictrum thalictroides]
IFM89_007168	hypothetical protein IFM89_007168 [Coptis chinensis]
IFM89_007625	hypothetical protein IFM89_007625 [Coptis chinensis]
IFM89_015516	hypothetical protein IFM89_015516 [Coptis chinensis]
IFM89_002478	hypothetical protein IFM89_002478 [Coptis chinensis]
IFM89_018010	hypothetical protein IFM89_018010 [Coptis chinensis]
novel.635	hypothetical protein IFM89_018576 [Coptis chinensis]
IFM89_011009	hypothetical protein IFM89_011009, partial [Coptis chinensis]
IFM89_003542	hypothetical protein IFM89_003542 [Coptis chinensis]
IFM89_014579	hypothetical protein IFM89_014579 [Coptis chinensis]
IFM89_024163	hypothetical protein IFM89_024163 [Coptis chinensis]
IFM89_018822	hypothetical protein IFM89_018822 [Coptis chinensis]
IFM89_008893	hypothetical protein IFM89_008893 [Coptis chinensis]
novel.7491	hypothetical protein IFM89_015655 [Coptis chinensis]
novel.8400	hypothetical protein IFM89_011147 [Coptis chinensis]
IFM89_017732	hypothetical protein IFM89_017732 [Coptis chinensis]
IFM89_036204	hypothetical protein IFM89_036204 [Coptis chinensis]
IFM89_039362	hypothetical protein IFM89_039362 [Coptis chinensis]
IFM89_037642	hypothetical protein IFM89_037642 [Coptis chinensis]
IFM89_013937	hypothetical protein IFM89_013937 [Coptis chinensis]
IFM89_009778	hypothetical protein IFM89_009778 [Coptis chinensis]
IFM89_016978	hypothetical protein IFM89_016978 [Coptis chinensis]
novel.8291	hypothetical protein AQUCO_03500039v1 [Aquilegia coerulea]
IFM89_020854	hypothetical protein IFM89_020854 [Coptis chinensis]
novel.2508	hypothetical protein IFM89_023247, partial [Coptis chinensis]
IFM89_009714	hypothetical protein IFM89_009714, partial [Coptis chinensis]
IFM89_022432	hypothetical protein IFM89_022432 [Coptis chinensis]
IFM89_033509	hypothetical protein IFM89_033509 [Coptis chinensis]
IFM89_018785	hypothetical protein IFM89_018780 [Coptis chinensis]
IFM89_001787	hypothetical protein IFM89_001787 [Coptis chinensis]
IFM89_033045	hypothetical protein IFM89_033045 [Coptis chinensis]
IFM89_007420	hypothetical protein IFM89_007420 [Coptis chinensis]
IFM89_000999	hypothetical protein IFM89_000999 [Coptis chinensis]
IFM89_013083	hypothetical protein IFM89_013083 [Coptis chinensis]
IFM89_020743	hypothetical protein IFM89_028536 [Coptis chinensis]
novel.8219	hypothetical protein AQUCO_01400938v1 [Aquilegia coerulea]
IFM89_032356	hypothetical protein IFM89_032356 [Coptis chinensis]
IFM89_027170	hypothetical protein IFM89_027170, partial [Coptis chinensis]
IFM89_017077	hypothetical protein IFM89_017077 [Coptis chinensis]
novel.5523	hypothetical protein IFM89_025570 [Coptis chinensis]
IFM89_011538	hypothetical protein IFM89_011538 [Coptis chinensis]
IFM89_032983	hypothetical protein IFM89_032983 [Coptis chinensis]
IFM89_010976	hypothetical protein IFM89_010976 [Coptis chinensis]
IFM89_015102	hypothetical protein IFM89_015102 [Coptis chinensis]
IFM89_021040	hypothetical protein IFM89_021040 [Coptis chinensis]
IFM89_028727	hypothetical protein IFM89_028727 [Coptis chinensis]
IFM89_039194	hypothetical protein IFM89_039194 [Coptis chinensis]
IFM89_020712	hypothetical protein IFM89_020712 [Coptis chinensis]
IFM89_024490	hypothetical protein IFM89_024490 [Coptis chinensis]
IFM89_037363	hypothetical protein IFM89_037363 [Coptis chinensis]
IFM89_013331	hypothetical protein IFM89_013331 [Coptis chinensis]
IFM89_002620	hypothetical protein IFM89_002620 [Coptis chinensis]
novel.6345	hypothetical protein CMV_013935 [Castanea mollissima]
IFM89_012424	hypothetical protein IFM89_012424 [Coptis chinensis]
IFM89_010525	hypothetical protein IFM89_010525 [Coptis chinensis]
IFM89_000562	hypothetical protein IFM89_000562 [Coptis chinensis]
novel.7453	Glycoside hydrolase [Macleaya cordata]
IFM89_033677	hypothetical protein IFM89_033677 [Coptis chinensis]
IFM89_031818	hypothetical protein IFM89_031818 [Coptis chinensis]
IFM89_032831	hypothetical protein IFM89_032831, partial [Coptis chinensis]
IFM89_004513	hypothetical protein IFM89_004513 [Coptis chinensis]
IFM89_012591	hypothetical protein IFM89_012591 [Coptis chinensis]
IFM89_015337	hypothetical protein IFM89_015337 [Coptis chinensis]
IFM89_032999	hypothetical protein IFM89_032999 [Coptis chinensis]
IFM89_030515	hypothetical protein IFM89_030515 [Coptis chinensis]
IFM89_010769	hypothetical protein IFM89_010769 [Coptis chinensis]
IFM89_007953	hypothetical protein IFM89_007953, partial [Coptis chinensis]
IFM89_017995	hypothetical protein IFM89_017995 [Coptis chinensis]
IFM89_028373	hypothetical protein IFM89_028373 [Coptis chinensis]
IFM89_037819	hypothetical protein IFM89_037819 [Coptis chinensis]
IFM89_017800	hypothetical protein IFM89_017800 [Coptis chinensis]
IFM89_017519	hypothetical protein IFM89_017519 [Coptis chinensis]
IFM89_016671	hypothetical protein IFM89_016671 [Coptis chinensis]
IFM89_006417	hypothetical protein IFM89_006417 [Coptis chinensis]
IFM89_021734	hypothetical protein IFM89_021734 [Coptis chinensis]
IFM89_016516	hypothetical protein IFM89_016516 [Coptis chinensis]
IFM89_000677	hypothetical protein IFM89_000677 [Coptis chinensis]
IFM89_006165	hypothetical protein IFM89_006165 [Coptis chinensis]
IFM89_013580	hypothetical protein IFM89_013580 [Coptis chinensis]
novel.4949	hypothetical protein IFM89_017216 [Coptis chinensis]
IFM89_020822	hypothetical protein IFM89_020822 [Coptis chinensis]
IFM89_023648	hypothetical protein IFM89_023648 [Coptis chinensis]
IFM89_005906	hypothetical protein IFM89_005906 [Coptis chinensis]
IFM89_012357	hypothetical protein IFM89_012357 [Coptis chinensis]
IFM89_023666	hypothetical protein IFM89_023666 [Coptis chinensis]
IFM89_025521	hypothetical protein IFM89_025521 [Coptis chinensis]
IFM89_008112	hypothetical protein IFM89_008112, partial [Coptis chinensis]
IFM89_032109	hypothetical protein IFM89_032109 [Coptis chinensis]
IFM89_017643	hypothetical protein IFM89_017643 [Coptis chinensis]
IFM89_016645	hypothetical protein IFM89_016645 [Coptis chinensis]
IFM89_036372	hypothetical protein IFM89_036372 [Coptis chinensis]
IFM89_002015	hypothetical protein IFM89_002015 [Coptis chinensis]
novel.8079	hypothetical protein IFM89_023736 [Coptis chinensis]
IFM89_014002	hypothetical protein IFM89_014002 [Coptis chinensis]
IFM89_021592	hypothetical protein IFM89_021592 [Coptis chinensis]
novel.5811	hypothetical protein IFM89_023711 [Coptis chinensis]
novel.8688	protein FATTY ACID EXPORT 2, chloroplastic-like [Dioscorea cayenensis subsp. rotundata]
novel.4638	hypothetical protein AQUCO_00700758v1 [Aquilegia coerulea]
IFM89_026727	hypothetical protein IFM89_026727 [Coptis chinensis]
IFM89_034172	hypothetical protein IFM89_034172 [Coptis chinensis]
IFM89_017434	hypothetical protein IFM89_017434 [Coptis chinensis]
novel.4994	hypothetical protein IFM89_013614 [Coptis chinensis]
IFM89_039934	hypothetical protein IFM89_039934 [Coptis chinensis]
IFM89_002313	hypothetical protein IFM89_002313, partial [Coptis chinensis]
IFM89_007700	hypothetical protein IFM89_007700 [Coptis chinensis]
novel.4227	hypothetical protein IFM89_003070 [Coptis chinensis]
IFM89_010703	hypothetical protein IFM89_010703 [Coptis chinensis]
IFM89_039455	hypothetical protein IFM89_039455 [Coptis chinensis]
IFM89_034391	hypothetical protein IFM89_034391 [Coptis chinensis]
IFM89_000116	hypothetical protein IFM89_000116 [Coptis chinensis]
IFM89_019847	hypothetical protein IFM89_019847 [Coptis chinensis]
IFM89_007607	hypothetical protein IFM89_007607 [Coptis chinensis]
IFM89_038479	hypothetical protein IFM89_038479 [Coptis chinensis]
IFM89_005793	hypothetical protein IFM89_005793, partial [Coptis chinensis]
IFM89_031719	hypothetical protein IFM89_031719 [Coptis chinensis]
IFM89_002012	hypothetical protein IFM89_002012 [Coptis chinensis]
IFM89_038873	hypothetical protein AQUCO_02800110v1 [Aquilegia coerulea]
IFM89_039640	hypothetical protein IFM89_039640, partial [Coptis chinensis]
IFM89_017742	hypothetical protein IFM89_017742, partial [Coptis chinensis]
IFM89_033347	hypothetical protein IFM89_033347 [Coptis chinensis]
IFM89_026253	hypothetical protein IFM89_026253 [Coptis chinensis]
IFM89_013921	hypothetical protein IFM89_013921 [Coptis chinensis]
novel.1912	hypothetical protein IFM89_008859 [Coptis chinensis]
IFM89_003973	hypothetical protein IFM89_003973 [Coptis chinensis]
IFM89_014009	hypothetical protein IFM89_014009 [Coptis chinensis]
IFM89_033909	hypothetical protein IFM89_033909 [Coptis chinensis]
novel.8024	hypothetical protein F8388_021935 [Cannabis sativa]
IFM89_034040	hypothetical protein IFM89_034040 [Coptis chinensis]
IFM89_001408	hypothetical protein IFM89_001408 [Coptis chinensis]
novel.8385	hypothetical protein POTOM_035933 [Populus tomentosa]
IFM89_015955	hypothetical protein IFM89_015955 [Coptis chinensis]
IFM89_011190	hypothetical protein IFM89_011190 [Coptis chinensis]
IFM89_034116	hypothetical protein IFM89_034116 [Coptis chinensis]
IFM89_000897	hypothetical protein IFM89_000897 [Coptis chinensis]
IFM89_003769	hypothetical protein IFM89_003769 [Coptis chinensis]
IFM89_035423	hypothetical protein IFM89_035423 [Coptis chinensis]
IFM89_035919	hypothetical protein IFM89_035919 [Coptis chinensis]
IFM89_008071	hypothetical protein IFM89_008071 [Coptis chinensis]
IFM89_023040	hypothetical protein IFM89_023040 [Coptis chinensis]
IFM89_031892	hypothetical protein IFM89_031892 [Coptis chinensis]
IFM89_007786	hypothetical protein IFM89_007786 [Coptis chinensis]
IFM89_015991	hypothetical protein IFM89_015991 [Coptis chinensis]
IFM89_031055	hypothetical protein IFM89_031055 [Coptis chinensis]
IFM89_033397	hypothetical protein IFM89_033397 [Coptis chinensis]
IFM89_002555	hypothetical protein IFM89_002555 [Coptis chinensis]
IFM89_012793	hypothetical protein IFM89_012793 [Coptis chinensis]
IFM89_028503	hypothetical protein IFM89_028503, partial [Coptis chinensis]
IFM89_030824	hypothetical protein IFM89_030824 [Coptis chinensis]
novel.6728	hypothetical protein IFM89_014426 [Coptis chinensis]
IFM89_011449	hypothetical protein IFM89_011449 [Coptis chinensis]
IFM89_039005	hypothetical protein IFM89_039005 [Coptis chinensis]
IFM89_002552	hypothetical protein IFM89_002552 [Coptis chinensis]
IFM89_013271	hypothetical protein IFM89_013271 [Coptis chinensis]
IFM89_036107	Ubiquitin-conjugating enzyme like, partial [Actinidia chinensis var. chinensis]
novel.6709	hypothetical protein AQUCO_03500043v1 [Aquilegia coerulea]
IFM89_036087	hypothetical protein IFM89_036087 [Coptis chinensis]
IFM89_007782	hypothetical protein IFM89_007782 [Coptis chinensis]
IFM89_009366	hypothetical protein IFM89_009366 [Coptis chinensis]
novel.697	hypothetical protein IFM89_030952, partial [Coptis chinensis]
IFM89_021227	hypothetical protein IFM89_021227 [Coptis chinensis]
IFM89_025761	hypothetical protein IFM89_025761 [Coptis chinensis]
IFM89_004009	hypothetical protein IFM89_004009 [Coptis chinensis]
novel.981	hypothetical protein IFM89_005081 [Coptis chinensis]
IFM89_003208	hypothetical protein IFM89_003208 [Coptis chinensis]
IFM89_021326	hypothetical protein IFM89_001904 [Coptis chinensis]
IFM89_034769	hypothetical protein IFM89_034769 [Coptis chinensis]
IFM89_037730	hypothetical protein IFM89_037730 [Coptis chinensis]
IFM89_030580	hypothetical protein IFM89_030580 [Coptis chinensis]
novel.3101	hypothetical protein IFM89_025981 [Coptis chinensis]
IFM89_006520	hypothetical protein IFM89_006520 [Coptis chinensis]
IFM89_032452	hypothetical protein IFM89_032452 [Coptis chinensis]
IFM89_031929	hypothetical protein IFM89_031929 [Coptis chinensis]
IFM89_031385	hypothetical protein IFM89_031385 [Coptis chinensis]
IFM89_032681	hypothetical protein IFM89_032681 [Coptis chinensis]
IFM89_002210	hypothetical protein IFM89_002210 [Coptis chinensis]
IFM89_021655	hypothetical protein IFM89_021655 [Coptis chinensis]
IFM89_037103	hypothetical protein IFM89_037103 [Coptis chinensis]
novel.6831	hypothetical protein C1H46_015892 [Malus baccata]
IFM89_039410	hypothetical protein IFM89_039410, partial [Coptis chinensis]
IFM89_037481	hypothetical protein IFM89_037481 [Coptis chinensis]
IFM89_017645	hypothetical protein IFM89_017645 [Coptis chinensis]
IFM89_005742	hypothetical protein IFM89_005742 [Coptis chinensis]
IFM89_028097	hypothetical protein IFM89_028097 [Coptis chinensis]
novel.6072	hypothetical protein FRX31_026101 [Thalictrum thalictroides]
IFM89_006107	hypothetical protein IFM89_006107 [Coptis chinensis]
IFM89_022036	hypothetical protein IFM89_022036 [Coptis chinensis]
novel.8296	hypothetical protein AQUCO_03500039v1 [Aquilegia coerulea]
IFM89_015501	hypothetical protein IFM89_015501 [Coptis chinensis]
IFM89_033645	hypothetical protein IFM89_033645 [Coptis chinensis]
IFM89_011087	hypothetical protein IFM89_011087 [Coptis chinensis]
IFM89_005280	hypothetical protein IFM89_005280 [Coptis chinensis]
IFM89_021674	hypothetical protein IFM89_021674 [Coptis chinensis]
IFM89_032839	Histone acetyltransferase hac1 [Thalictrum thalictroides]
IFM89_032939	hypothetical protein IFM89_032939 [Coptis chinensis]
IFM89_020545	hypothetical protein IFM89_020545 [Coptis chinensis]
IFM89_023067	hypothetical protein IFM89_023067 [Coptis chinensis]
IFM89_012170	hypothetical protein IFM89_012170 [Coptis chinensis]
IFM89_006112	hypothetical protein IFM89_006112 [Coptis chinensis]
IFM89_005176	hypothetical protein IFM89_005176 [Coptis chinensis]
novel.8341	2-alkenal reductase (NADP(+)-dependent)-like [Ipomoea triloba]
IFM89_038513	hypothetical protein IFM89_038513 [Coptis chinensis]
IFM89_007754	hypothetical protein IFM89_007754 [Coptis chinensis]
IFM89_018923	hypothetical protein IFM89_018923 [Coptis chinensis]
IFM89_004764	hypothetical protein IFM89_004764 [Coptis chinensis]
IFM89_027568	hypothetical protein IFM89_027568 [Coptis chinensis]
IFM89_023646	hypothetical protein IFM89_023646 [Coptis chinensis]
IFM89_026968	hypothetical protein IFM89_026968 [Coptis chinensis]
IFM89_016841	hypothetical protein IFM89_016841 [Coptis chinensis]
IFM89_031558	hypothetical protein IFM89_031558 [Coptis chinensis]
IFM89_029110	hypothetical protein IFM89_029110 [Coptis chinensis]
IFM89_006396	hypothetical protein IFM89_006396 [Coptis chinensis]
IFM89_016922	hypothetical protein IFM89_016922 [Coptis chinensis]
IFM89_032068	hypothetical protein IFM89_032068 [Coptis chinensis]
IFM89_008182	hypothetical protein IFM89_008182 [Coptis chinensis]
novel.3521	hypothetical protein CMV_006588 [Castanea mollissima]
novel.840	hypothetical protein L6452_19816 [Arctium lappa]
IFM89_020636	hypothetical protein IFM89_020636 [Coptis chinensis]
IFM89_027935	hypothetical protein IFM89_027935 [Coptis chinensis]
IFM89_011501	hypothetical protein IFM89_011501 [Coptis chinensis]
IFM89_033124	hypothetical protein IFM89_033124 [Coptis chinensis]
IFM89_004264	hypothetical protein IFM89_004264 [Coptis chinensis]
novel.2920	hypothetical protein AQUCO_01300040v1 [Aquilegia coerulea]
IFM89_002799	hypothetical protein IFM89_002799 [Coptis chinensis]
IFM89_001669	hypothetical protein IFM89_001669 [Coptis chinensis]
IFM89_004445	hypothetical protein IFM89_004445 [Coptis chinensis]
IFM89_036718	hypothetical protein IFM89_036718 [Coptis chinensis]
IFM89_035262	hypothetical protein IFM89_035262 [Coptis chinensis]
IFM89_018664	hypothetical protein IFM89_018664 [Coptis chinensis]
IFM89_016471	hypothetical protein IFM89_016471 [Coptis chinensis]
novel.3129	hypothetical protein DKX38_026695 [Salix brachista]
IFM89_034303	hypothetical protein IFM89_034303 [Coptis chinensis]
IFM89_021699	histone H4 [Vibrio parahaemolyticus]
IFM89_017460	hypothetical protein IFM89_017460 [Coptis chinensis]
IFM89_017974	hypothetical protein IFM89_017974 [Coptis chinensis]
IFM89_035281	hypothetical protein IFM89_035281 [Coptis chinensis]
IFM89_037667	hypothetical protein IFM89_037667 [Coptis chinensis]
IFM89_021044	hypothetical protein IFM89_021044 [Coptis chinensis]
IFM89_036042	hypothetical protein IFM89_036042 [Coptis chinensis]
IFM89_028762	hypothetical protein IFM89_028762 [Coptis chinensis]
IFM89_022728	hypothetical protein IFM89_022728 [Coptis chinensis]
IFM89_019668	hypothetical protein IFM89_019668 [Coptis chinensis]
IFM89_023104	hypothetical protein IFM89_023104 [Coptis chinensis]
novel.1211	hypothetical protein IFM89_035313 [Coptis chinensis]
IFM89_001004	hypothetical protein IFM89_001004 [Coptis chinensis]
IFM89_029680	hypothetical protein IFM89_029680 [Coptis chinensis]
IFM89_036270	hypothetical protein IFM89_036270 [Coptis chinensis]
IFM89_014094	hypothetical protein IFM89_014094 [Coptis chinensis]
novel.8057	EGF-like calcium-binding domain [Macleaya cordata]
IFM89_033036	hypothetical protein IFM89_033036 [Coptis chinensis]
IFM89_004052	hypothetical protein IFM89_004051 [Coptis chinensis]
IFM89_025791	hypothetical protein IFM89_025791 [Coptis chinensis]
IFM89_005618	hypothetical protein IFM89_005618 [Coptis chinensis]
IFM89_023799	hypothetical protein IFM89_023799 [Coptis chinensis]
novel.4652	hypothetical protein IFM89_017869 [Coptis chinensis]
IFM89_004990	hypothetical protein IFM89_004990 [Coptis chinensis]
IFM89_033320	hypothetical protein IFM89_033320, partial [Coptis chinensis]
IFM89_016964	hypothetical protein IFM89_016964 [Coptis chinensis]
IFM89_019657	hypothetical protein IFM89_019657 [Coptis chinensis]
IFM89_029851	hypothetical protein IFM89_029851 [Coptis chinensis]
IFM89_008844	hypothetical protein IFM89_008844 [Coptis chinensis]
IFM89_016544	hypothetical protein IFM89_016544 [Coptis chinensis]
IFM89_003489	hypothetical protein IFM89_003489 [Coptis chinensis]
IFM89_012141	hypothetical protein IFM89_012141 [Coptis chinensis]
IFM89_008189	hypothetical protein IFM89_008189 [Coptis chinensis]
novel.3352	Glycine cleavage t-protein family [Thalictrum thalictroides]
IFM89_006354	hypothetical protein IFM89_006354 [Coptis chinensis]
IFM89_010994	hypothetical protein IFM89_010994 [Coptis chinensis]
IFM89_012278	hypothetical protein IFM89_012278 [Coptis chinensis]
IFM89_011972	hypothetical protein IFM89_011972 [Coptis chinensis]
IFM89_030880	hypothetical protein IFM89_030880 [Coptis chinensis]
IFM89_002143	hypothetical protein IFM89_002143 [Coptis chinensis]
IFM89_014903	hypothetical protein IFM89_014903 [Coptis chinensis]
IFM89_004485	hypothetical protein IFM89_004485 [Coptis chinensis]
IFM89_028878	hypothetical protein IFM89_028878 [Coptis chinensis]
IFM89_012779	hypothetical protein IFM89_012779 [Coptis chinensis]
IFM89_011002	hypothetical protein IFM89_011002 [Coptis chinensis]
IFM89_004452	hypothetical protein IFM89_004452 [Coptis chinensis]
IFM89_014420	hypothetical protein IFM89_014420 [Coptis chinensis]
IFM89_010163	hypothetical protein IFM89_010163 [Coptis chinensis]
IFM89_019902	hypothetical protein IFM89_019902 [Coptis chinensis]
IFM89_004225	hypothetical protein IFM89_004225 [Coptis chinensis]
IFM89_020983	hypothetical protein IFM89_020983 [Coptis chinensis]
IFM89_036077	hypothetical protein IFM89_036077 [Coptis chinensis]
IFM89_003574	hypothetical protein IFM89_003574 [Coptis chinensis]
IFM89_031353	hypothetical protein IFM89_031353 [Coptis chinensis]
IFM89_001317	hypothetical protein IFM89_001317 [Coptis chinensis]
IFM89_001502	hypothetical protein IFM89_001502 [Coptis chinensis]
IFM89_003672	hypothetical protein IFM89_003672 [Coptis chinensis]
novel.8247	hypothetical protein AQUCO_09100087v1 [Aquilegia coerulea]
IFM89_006139	hypothetical protein IFM89_006139 [Coptis chinensis]
IFM89_014828	hypothetical protein IFM89_014828 [Coptis chinensis]
IFM89_012601	hypothetical protein IFM89_012601 [Coptis chinensis]
IFM89_000515	hypothetical protein IFM89_000515 [Coptis chinensis]
IFM89_002400	hypothetical protein IFM89_002400 [Coptis chinensis]
novel.305	hypothetical protein IFM89_039779 [Coptis chinensis]
IFM89_003785	hypothetical protein IFM89_003785 [Coptis chinensis]
IFM89_022592	hypothetical protein IFM89_022592 [Coptis chinensis]
novel.6808	succinate-semialdehyde dehydrogenase mitochondrial-like [Trifolium medium]
IFM89_022623	hypothetical protein IFM89_022623 [Coptis chinensis]
IFM89_037272	hypothetical protein IFM89_037272 [Coptis chinensis]
IFM89_036790	hypothetical protein IFM89_036790 [Coptis chinensis]
IFM89_004815	hypothetical protein IFM89_004815 [Coptis chinensis]
IFM89_011851	hypothetical protein IFM89_011851 [Coptis chinensis]
IFM89_012243	hypothetical protein IFM89_012243 [Coptis chinensis]
IFM89_023376	hypothetical protein IFM89_023376 [Coptis chinensis]
IFM89_001074	hypothetical protein IFM89_001074 [Coptis chinensis]
IFM89_029533	hypothetical protein IFM89_029533 [Coptis chinensis]
IFM89_017600	hypothetical protein IFM89_017600 [Coptis chinensis]
IFM89_033250	hypothetical protein IFM89_033250 [Coptis chinensis]
IFM89_004084	hypothetical protein IFM89_004084 [Coptis chinensis]
IFM89_003439	hypothetical protein IFM89_003439 [Coptis chinensis]
novel.1568	hypothetical protein IFM89_013902 [Coptis chinensis]
IFM89_022292	hypothetical protein IFM89_022292 [Coptis chinensis]
IFM89_022709	hypothetical protein IFM89_022709 [Coptis chinensis]
IFM89_012411	hypothetical protein IFM89_012411 [Coptis chinensis]
IFM89_032065	hypothetical protein IFM89_032065 [Coptis chinensis]
IFM89_023612	hypothetical protein IFM89_023612 [Coptis chinensis]
IFM89_010586	hypothetical protein IFM89_010586 [Coptis chinensis]
IFM89_029635	hypothetical protein IFM89_029635 [Coptis chinensis]
IFM89_031343	hypothetical protein IFM89_031343 [Coptis chinensis]
IFM89_017350	hypothetical protein IFM89_017350 [Coptis chinensis]
IFM89_030751	hypothetical protein IFM89_030751 [Coptis chinensis]
IFM89_016305	hypothetical protein IFM89_016305 [Coptis chinensis]
IFM89_016159	hypothetical protein IFM89_016159, partial [Coptis chinensis]
IFM89_005798	hypothetical protein IFM89_005798 [Coptis chinensis]
IFM89_033585	hypothetical protein IFM89_033585 [Coptis chinensis]
IFM89_017054	hypothetical protein IFM89_017054 [Coptis chinensis]
IFM89_018529	hypothetical protein IFM89_018529 [Coptis chinensis]
IFM89_034877	hypothetical protein IFM89_034877 [Coptis chinensis]
IFM89_018921	hypothetical protein IFM89_018921 [Coptis chinensis]
IFM89_009007	hypothetical protein IFM89_009007 [Coptis chinensis]
IFM89_021953	hypothetical protein IFM89_021953, partial [Coptis chinensis]
novel.4436	protein FAR1-RELATED SEQUENCE 1-like [Asparagus officinalis]
IFM89_013823	hypothetical protein IFM89_013823 [Coptis chinensis]
IFM89_017356	hypothetical protein IFM89_017356 [Coptis chinensis]
IFM89_031757	hypothetical protein IFM89_031757 [Coptis chinensis]
IFM89_037638	hypothetical protein IFM89_037638 [Coptis chinensis]
IFM89_036384	hypothetical protein IFM89_036384 [Coptis chinensis]
IFM89_019662	hypothetical protein IFM89_019662 [Coptis chinensis]
IFM89_020527	hypothetical protein IFM89_020527 [Coptis chinensis]
IFM89_010496	hypothetical protein IFM89_010496 [Coptis chinensis]
IFM89_013470	hypothetical protein IFM89_013470 [Coptis chinensis]
IFM89_038470	hypothetical protein IFM89_038470 [Coptis chinensis]
IFM89_028740	hypothetical protein IFM89_028740 [Coptis chinensis]
IFM89_023251	hypothetical protein IFM89_023251 [Coptis chinensis]
IFM89_001599	hypothetical protein IFM89_001599 [Coptis chinensis]
IFM89_009659	hypothetical protein IFM89_009659 [Coptis chinensis]
IFM89_022998	hypothetical protein IFM89_022998 [Coptis chinensis]
novel.5411	hypothetical protein AQUCO_07800020v1, partial [Aquilegia coerulea]
IFM89_031552	hypothetical protein IFM89_031552 [Coptis chinensis]
IFM89_028571	hypothetical protein IFM89_028571 [Coptis chinensis]
IFM89_034839	hypothetical protein IFM89_034839 [Coptis chinensis]
IFM89_017907	hypothetical protein IFM89_017907 [Coptis chinensis]
IFM89_014886	hypothetical protein IFM89_014886 [Coptis chinensis]
IFM89_001467	hypothetical protein IFM89_001467 [Coptis chinensis]
IFM89_022376	hypothetical protein IFM89_022376 [Coptis chinensis]
IFM89_010161	hypothetical protein IFM89_010161 [Coptis chinensis]
IFM89_023635	hypothetical protein IFM89_023635 [Coptis chinensis]
IFM89_002969	hypothetical protein IFM89_006144 [Coptis chinensis]
IFM89_037672	hypothetical protein IFM89_037672 [Coptis chinensis]
IFM89_029692	hypothetical protein IFM89_029692 [Coptis chinensis]
IFM89_002353	hypothetical protein IFM89_002353 [Coptis chinensis]
IFM89_017631	hypothetical protein IFM89_017631 [Coptis chinensis]
IFM89_026032	hypothetical protein IFM89_026032 [Coptis chinensis]
IFM89_039875	hypothetical protein IFM89_039875 [Coptis chinensis]
IFM89_033609	hypothetical protein IFM89_033609 [Coptis chinensis]
IFM89_016231	hypothetical protein IFM89_016231 [Coptis chinensis]
IFM89_034902	hypothetical protein IFM89_034902 [Coptis chinensis]
IFM89_007550	hypothetical protein IFM89_007550 [Coptis chinensis]
IFM89_008574	hypothetical protein IFM89_008574 [Coptis chinensis]
IFM89_015948	hypothetical protein IFM89_015948 [Coptis chinensis]
novel.3666	hypothetical protein SASPL_101200 [Salvia splendens]
IFM89_023474	hypothetical protein IFM89_023474 [Coptis chinensis]
IFM89_036247	hypothetical protein IFM89_036247 [Coptis chinensis]
IFM89_019326	hypothetical protein IFM89_019326 [Coptis chinensis]
IFM89_019402	hypothetical protein IFM89_019402 [Coptis chinensis]
IFM89_030408	hypothetical protein IFM89_030408 [Coptis chinensis]
IFM89_013424	hypothetical protein IFM89_013424 [Coptis chinensis]
IFM89_015879	hypothetical protein IFM89_015879 [Coptis chinensis]
IFM89_024248	hypothetical protein IFM89_024248, partial [Coptis chinensis]
IFM89_028296	hypothetical protein IFM89_028296 [Coptis chinensis]
IFM89_029360	hypothetical protein IFM89_029360 [Coptis chinensis]
IFM89_020031	hypothetical protein IFM89_020031 [Coptis chinensis]
novel.3487	hypothetical protein KPL70_007175 [Citrus sinensis]
IFM89_016220	hypothetical protein IFM89_016220 [Coptis chinensis]
IFM89_033857	hypothetical protein IFM89_033857 [Coptis chinensis]
novel.8750	RING-H2 finger protein ATL56-like [Telopea speciosissima]
IFM89_038865	hypothetical protein IFM89_038865 [Coptis chinensis]
IFM89_013928	hypothetical protein IFM89_013928, partial [Coptis chinensis]
IFM89_012575	hypothetical protein IFM89_012575 [Coptis chinensis]
IFM89_024884	hypothetical protein IFM89_024884 [Coptis chinensis]
IFM89_007997	hypothetical protein IFM89_007997 [Coptis chinensis]
IFM89_012645	hypothetical protein IFM89_012645 [Coptis chinensis]
novel.7342	hypothetical protein IFM89_016031 [Coptis chinensis]
novel.4374	hypothetical protein IFM89_013012 [Coptis chinensis]
IFM89_039882	hypothetical protein IFM89_039882 [Coptis chinensis]
IFM89_000678	hypothetical protein IFM89_000678 [Coptis chinensis]
IFM89_028066	hypothetical protein IFM89_028066 [Coptis chinensis]
IFM89_021411	hypothetical protein IFM89_021411 [Coptis chinensis]
IFM89_036995	hypothetical protein IFM89_036995 [Coptis chinensis]
IFM89_007923	hypothetical protein IFM89_007923 [Coptis chinensis]
IFM89_010375	hypothetical protein IFM89_010375 [Coptis chinensis]
IFM89_012064	hypothetical protein IFM89_012064 [Coptis chinensis]
IFM89_008155	hypothetical protein IFM89_008155, partial [Coptis chinensis]
IFM89_037305	hypothetical protein IFM89_037305 [Coptis chinensis]
IFM89_007683	hypothetical protein IFM89_007683 [Coptis chinensis]
IFM89_001598	hypothetical protein IFM89_001598 [Coptis chinensis]
novel.8969	hypothetical protein AQUCO_01300053v1 [Aquilegia coerulea]
IFM89_021795	hypothetical protein IFM89_021795 [Coptis chinensis]
IFM89_038967	hypothetical protein IFM89_038967 [Coptis chinensis]
IFM89_039773	hypothetical protein IFM89_039773 [Coptis chinensis]
IFM89_014500	hypothetical protein IFM89_014500 [Coptis chinensis]
IFM89_021361	hypothetical protein IFM89_021361 [Coptis chinensis]
IFM89_028524	hypothetical protein IFM89_028524 [Coptis chinensis]
IFM89_017626	hypothetical protein IFM89_017626 [Coptis chinensis]
IFM89_020728	hypothetical protein IFM89_020728 [Coptis chinensis]
IFM89_021299	hypothetical protein IFM89_021299 [Coptis chinensis]
IFM89_020122	hypothetical protein IFM89_020122 [Coptis chinensis]
IFM89_015826	hypothetical protein IFM89_015826 [Coptis chinensis]
IFM89_005561	hypothetical protein IFM89_005561 [Coptis chinensis]
IFM89_014774	hypothetical protein IFM89_014774 [Coptis chinensis]
IFM89_036191	hypothetical protein IFM89_036191 [Coptis chinensis]
IFM89_025525	hypothetical protein IFM89_025525 [Coptis chinensis]
IFM89_019417	hypothetical protein IFM89_019417 [Coptis chinensis]
IFM89_038469	hypothetical protein IFM89_038469 [Coptis chinensis]
novel.1579	hypothetical protein IFM89_009527 [Coptis chinensis]
IFM89_010103	hypothetical protein IFM89_010103 [Coptis chinensis]
novel.7458	uncharacterized protein LOC113306274 [Papaver somniferum]
IFM89_032409	hypothetical protein IFM89_032409 [Coptis chinensis]
IFM89_028986	hypothetical protein IFM89_028986 [Coptis chinensis]
IFM89_001021	histone H3.2 [Zea mays]
IFM89_007897	hypothetical protein IFM89_007897 [Coptis chinensis]
IFM89_017908	hypothetical protein IFM89_017908 [Coptis chinensis]
IFM89_011224	hypothetical protein IFM89_011224 [Coptis chinensis]
IFM89_032845	hypothetical protein IFM89_032845 [Coptis chinensis]
IFM89_015738	hypothetical protein IFM89_021081 [Coptis chinensis]
IFM89_039307	hypothetical protein IFM89_039307 [Coptis chinensis]
IFM89_020334	hypothetical protein IFM89_020334 [Coptis chinensis]
IFM89_037546	hypothetical protein IFM89_037546 [Coptis chinensis]
IFM89_005168	hypothetical protein IFM89_005168 [Coptis chinensis]
IFM89_038814	hypothetical protein IFM89_038814 [Coptis chinensis]
novel.2700	hypothetical protein IFM89_021356 [Coptis chinensis]
novel.5480	hypothetical protein RchiOBHm_Chr4g0401171 [Rosa chinensis]
IFM89_017236	hypothetical protein IFM89_017236 [Coptis chinensis]
IFM89_022481	hypothetical protein IFM89_022481 [Coptis chinensis]
IFM89_036408	hypothetical protein IFM89_036408, partial [Coptis chinensis]
IFM89_023180	hypothetical protein IFM89_023180 [Coptis chinensis]
IFM89_018353	Histidine decarboxylase-like protein [Thalictrum thalictroides]
IFM89_028657	hypothetical protein IFM89_028657 [Coptis chinensis]
IFM89_013531	hypothetical protein IFM89_013531 [Coptis chinensis]
IFM89_014790	hypothetical protein IFM89_014790 [Coptis chinensis]
IFM89_009836	hypothetical protein IFM89_009836 [Coptis chinensis]
IFM89_039035	hypothetical protein IFM89_039035 [Coptis chinensis]
IFM89_030792	hypothetical protein IFM89_030792 [Coptis chinensis]
IFM89_018180	hypothetical protein IFM89_018180 [Coptis chinensis]
IFM89_034393	hypothetical protein IFM89_034393 [Coptis chinensis]
IFM89_026940	hypothetical protein IFM89_010087 [Coptis chinensis]
IFM89_036902	hypothetical protein IFM89_036902 [Coptis chinensis]
IFM89_033444	hypothetical protein IFM89_033444 [Coptis chinensis]
IFM89_002829	hypothetical protein IFM89_002829 [Coptis chinensis]
IFM89_008861	hypothetical protein IFM89_008861 [Coptis chinensis]
IFM89_039540	hypothetical protein IFM89_039540 [Coptis chinensis]
IFM89_039423	hypothetical protein IFM89_039423 [Coptis chinensis]
IFM89_015213	hypothetical protein IFM89_015213 [Coptis chinensis]
IFM89_028287	hypothetical protein IFM89_028287 [Coptis chinensis]
IFM89_004774	hypothetical protein IFM89_004774 [Coptis chinensis]
IFM89_035583	hypothetical protein IFM89_035583 [Coptis chinensis]
IFM89_015168	hypothetical protein IFM89_015168 [Coptis chinensis]
IFM89_028388	hypothetical protein IFM89_028388 [Coptis chinensis]
IFM89_039590	hypothetical protein IFM89_039590 [Coptis chinensis]
IFM89_020967	hypothetical protein IFM89_020967 [Coptis chinensis]
IFM89_007205	hypothetical protein IFM89_007205 [Coptis chinensis]
IFM89_012651	hypothetical protein IFM89_012651 [Coptis chinensis]
IFM89_002960	hypothetical protein IFM89_002960 [Coptis chinensis]
IFM89_010986	hypothetical protein IFM89_010986 [Coptis chinensis]
IFM89_015985	hypothetical protein IFM89_015985 [Coptis chinensis]
novel.8178	reductase [Hibiscus syriacus]
IFM89_003174	hypothetical protein IFM89_003174 [Coptis chinensis]
novel.8208	PREDICTED: magnesium-protoporphyrin IX monomethyl ester [oxidative]
IFM89_020942	hypothetical protein IFM89_020942 [Coptis chinensis]
IFM89_035977	hypothetical protein IFM89_035977 [Coptis chinensis]
IFM89_025447	hypothetical protein IFM89_025447 [Coptis chinensis]
novel.6376	26s proteasome regulatory subunit 6B, variant 2 [Pisum sativum]
IFM89_021190	hypothetical protein IFM89_021190 [Coptis chinensis]
IFM89_032149	hypothetical protein IFM89_032149 [Coptis chinensis]
IFM89_012091	hypothetical protein IFM89_012091 [Coptis chinensis]
IFM89_039180	hypothetical protein IFM89_039180 [Coptis chinensis]
IFM89_004142	hypothetical protein IFM89_004142 [Coptis chinensis]
IFM89_012423	histone H4 [Vibrio parahaemolyticus]
IFM89_036951	hypothetical protein IFM89_036951 [Coptis chinensis]
IFM89_028293	hypothetical protein IFM89_028293 [Coptis chinensis]
novel.8645	hypothetical protein AQUCO_02000560v1 [Aquilegia coerulea]
IFM89_016358	hypothetical protein IFM89_016358 [Coptis chinensis]
IFM89_008180	hypothetical protein IFM89_008180 [Coptis chinensis]
IFM89_008429	hypothetical protein IFM89_008429 [Coptis chinensis]
IFM89_013949	hypothetical protein IFM89_013949 [Coptis chinensis]
IFM89_016807	hypothetical protein IFM89_016807 [Coptis chinensis]
novel.2683	hypothetical protein IFM89_021800 [Coptis chinensis]
IFM89_007626	hypothetical protein IFM89_007626 [Coptis chinensis]
IFM89_021502	hypothetical protein IFM89_021502 [Coptis chinensis]
IFM89_001383	hypothetical protein IFM89_001383 [Coptis chinensis]
IFM89_009765	hypothetical protein IFM89_009765 [Coptis chinensis]
novel.7211	DNA/RNA polymerases superfamily protein [Gossypium australe]
IFM89_027954	hypothetical protein IFM89_027954 [Coptis chinensis]
IFM89_027201	hypothetical protein IFM89_027201 [Coptis chinensis]
IFM89_002576	hypothetical protein IFM89_002576 [Coptis chinensis]
IFM89_000992	hypothetical protein IFM89_000992 [Coptis chinensis]
IFM89_038086	hypothetical protein IFM89_038086 [Coptis chinensis]
IFM89_020871	hypothetical protein IFM89_020871 [Coptis chinensis]
IFM89_021432	hypothetical protein IFM89_021432 [Coptis chinensis]
IFM89_035989	hypothetical protein IFM89_035989 [Coptis chinensis]
IFM89_019482	hypothetical protein IFM89_019482 [Coptis chinensis]
IFM89_039755	hypothetical protein IFM89_039755 [Coptis chinensis]
IFM89_018252	hypothetical protein IFM89_018252 [Coptis chinensis]
IFM89_031383	hypothetical protein IFM89_031383 [Coptis chinensis]
IFM89_029886	hypothetical protein IFM89_029886, partial [Coptis chinensis]
IFM89_021901	hypothetical protein IFM89_021901 [Coptis chinensis]
IFM89_027609	hypothetical protein IFM89_015102 [Coptis chinensis]
IFM89_011586	hypothetical protein IFM89_011586 [Coptis chinensis]
IFM89_029029	hypothetical protein IFM89_029029 [Coptis chinensis]
IFM89_013484	hypothetical protein IFM89_013484 [Coptis chinensis]
IFM89_003960	hypothetical protein IFM89_003960 [Coptis chinensis]
IFM89_022039	hypothetical protein IFM89_022039 [Coptis chinensis]
IFM89_021639	hypothetical protein IFM89_021639 [Coptis chinensis]
novel.7021	transposable element gene [Prunus dulcis]
IFM89_005974	hypothetical protein IFM89_005974 [Coptis chinensis]
IFM89_017664	hypothetical protein IFM89_017664 [Coptis chinensis]
novel.3525	hypothetical protein CR513_02839, partial [Mucuna pruriens]
novel.1976	hypothetical protein IFM89_039760 [Coptis chinensis]
IFM89_004099	hypothetical protein IFM89_004099 [Coptis chinensis]
IFM89_037177	hypothetical protein IFM89_037177 [Coptis chinensis]
IFM89_031742	hypothetical protein IFM89_031742 [Coptis chinensis]
IFM89_033380	hypothetical protein IFM89_033380 [Coptis chinensis]
novel.6971	hypothetical protein CQW23_35017 [Capsicum baccatum]
IFM89_018778	hypothetical protein IFM89_018778 [Coptis chinensis]
IFM89_036912	hypothetical protein IFM89_036912 [Coptis chinensis]
IFM89_000333	hypothetical protein IFM89_000333 [Coptis chinensis]
IFM89_024983	hypothetical protein IFM89_024983 [Coptis chinensis]
IFM89_004502	hypothetical protein IFM89_004502 [Coptis chinensis]
IFM89_020625	hypothetical protein IFM89_020625 [Coptis chinensis]
IFM89_020843	hypothetical protein IFM89_020843 [Coptis chinensis]
IFM89_013402	hypothetical protein IFM89_013402 [Coptis chinensis]
IFM89_012801	hypothetical protein IFM89_012801 [Coptis chinensis]
IFM89_031254	hypothetical protein IFM89_031254, partial [Coptis chinensis]
IFM89_032728	hypothetical protein IFM89_032728 [Coptis chinensis]
IFM89_021813	hypothetical protein IFM89_021813 [Coptis chinensis]
IFM89_020966	hypothetical protein IFM89_020966 [Coptis chinensis]
IFM89_012988	hypothetical protein IFM89_012988 [Coptis chinensis]
IFM89_004835	hypothetical protein IFM89_004835 [Coptis chinensis]
novel.8384	Scarecrow-like transcription factor pat1 [Thalictrum thalictroides]
novel.5040	hypothetical protein IFM89_022838 [Coptis chinensis]
IFM89_001175	hypothetical protein IFM89_001175 [Coptis chinensis]
IFM89_037646	hypothetical protein IFM89_037646 [Coptis chinensis]
IFM89_028026	hypothetical protein IFM89_028026 [Coptis chinensis]
IFM89_002927	hypothetical protein IFM89_002927 [Coptis chinensis]
IFM89_034648	hypothetical protein IFM89_034648 [Coptis chinensis]
IFM89_028491	hypothetical protein IFM89_028491 [Coptis chinensis]
IFM89_020948	hypothetical protein IFM89_020948 [Coptis chinensis]
IFM89_001148	hypothetical protein IFM89_001148 [Coptis chinensis]
IFM89_023185	hypothetical protein IFM89_023185 [Coptis chinensis]
IFM89_016035	hypothetical protein IFM89_016035 [Coptis chinensis]
IFM89_018022	hypothetical protein IFM89_018022 [Coptis chinensis]
IFM89_001196	hypothetical protein IFM89_001196 [Coptis chinensis]
IFM89_001465	hypothetical protein IFM89_001465 [Coptis chinensis]
IFM89_027881	hypothetical protein IFM89_027881 [Coptis chinensis]
IFM89_035544	hypothetical protein IFM89_035544 [Coptis chinensis]
IFM89_023378	hypothetical protein IFM89_023378, partial [Coptis chinensis]
IFM89_011843	hypothetical protein IFM89_011843 [Coptis chinensis]
novel.5310	hypothetical protein IFM89_032397 [Coptis chinensis]
IFM89_026429	hypothetical protein IFM89_026429 [Coptis chinensis]
IFM89_033960	hypothetical protein AQUCO_00700506v1 [Aquilegia coerulea]
IFM89_024446	hypothetical protein IFM89_024446 [Coptis chinensis]
novel.8201	hypothetical protein AQUCO_01400890v1 [Aquilegia coerulea]
IFM89_020477	hypothetical protein IFM89_020477, partial [Coptis chinensis]
IFM89_010549	hypothetical protein IFM89_010549 [Coptis chinensis]
IFM89_000799	hypothetical protein IFM89_000799 [Coptis chinensis]
IFM89_026965	hypothetical protein IFM89_026965 [Coptis chinensis]
IFM89_004219	hypothetical protein IFM89_004219 [Coptis chinensis]
IFM89_037355	hypothetical protein IFM89_037355 [Coptis chinensis]
IFM89_002738	hypothetical protein IFM89_002738 [Coptis chinensis]
IFM89_025851	hypothetical protein IFM89_025851 [Coptis chinensis]
IFM89_018580	hypothetical protein IFM89_018580 [Coptis chinensis]
IFM89_020644	hypothetical protein IFM89_020644 [Coptis chinensis]
IFM89_018115	hypothetical protein IFM89_018115 [Coptis chinensis]
IFM89_003856	hypothetical protein IFM89_003856 [Coptis chinensis]
IFM89_031482	hypothetical protein IFM89_031482 [Coptis chinensis]
IFM89_015726	hypothetical protein IFM89_015726 [Coptis chinensis]
IFM89_011863	hypothetical protein IFM89_011863 [Coptis chinensis]
IFM89_034065	hypothetical protein IFM89_034065 [Coptis chinensis]
IFM89_037522	hypothetical protein IFM89_037522 [Coptis chinensis]
IFM89_011711	hypothetical protein IFM89_011711 [Coptis chinensis]
novel.3107	hypothetical protein IFM89_011588 [Coptis chinensis]
IFM89_028643	hypothetical protein IFM89_028643 [Coptis chinensis]
IFM89_038777	hypothetical protein IFM89_038777 [Coptis chinensis]
IFM89_014042	hypothetical protein IFM89_014042 [Coptis chinensis]
IFM89_004718	hypothetical protein IFM89_004718 [Coptis chinensis]
IFM89_016688	hypothetical protein IFM89_016688, partial [Coptis chinensis]
IFM89_030917	hypothetical protein IFM89_030917 [Coptis chinensis]
IFM89_028854	hypothetical protein IFM89_028854 [Coptis chinensis]
IFM89_007647	hypothetical protein IFM89_007647 [Coptis chinensis]
IFM89_008577	hypothetical protein IFM89_008577 [Coptis chinensis]
IFM89_031074	hypothetical protein IFM89_031074 [Coptis chinensis]
IFM89_029148	hypothetical protein IFM89_029148 [Coptis chinensis]
IFM89_024078	hypothetical protein IFM89_024078 [Coptis chinensis]
IFM89_036405	hypothetical protein IFM89_036405 [Coptis chinensis]
IFM89_020225	hypothetical protein IFM89_020225 [Coptis chinensis]
IFM89_017814	hypothetical protein IFM89_017814 [Coptis chinensis]
IFM89_010707	hypothetical protein IFM89_010707 [Coptis chinensis]
IFM89_001503	hypothetical protein IFM89_001503 [Coptis chinensis]
IFM89_031256	hypothetical protein IFM89_031256 [Coptis chinensis]
IFM89_009805	hypothetical protein IFM89_009805 [Coptis chinensis]
IFM89_012204	hypothetical protein IFM89_012204 [Coptis chinensis]
IFM89_018080	hypothetical protein IFM89_018080 [Coptis chinensis]
IFM89_030919	hypothetical protein IFM89_030919 [Coptis chinensis]
IFM89_014457	hypothetical protein IFM89_014457 [Coptis chinensis]
IFM89_020441	hypothetical protein IFM89_020441 [Coptis chinensis]
novel.8224	hypothetical protein AQUCO_01400943v1, partial [Aquilegia coerulea]
IFM89_009757	hypothetical protein IFM89_009757 [Coptis chinensis]
IFM89_018629	hypothetical protein IFM89_018629, partial [Coptis chinensis]
IFM89_005553	hypothetical protein IFM89_005553 [Coptis chinensis]
IFM89_003374	hypothetical protein IFM89_003374 [Coptis chinensis]
IFM89_024656	hypothetical protein IFM89_024656 [Coptis chinensis]
IFM89_038094	hypothetical protein IFM89_027443 [Coptis chinensis]
IFM89_021283	hypothetical protein IFM89_021283 [Coptis chinensis]
IFM89_028650	hypothetical protein IFM89_028650 [Coptis chinensis]
IFM89_032590	hypothetical protein IFM89_032590 [Coptis chinensis]
IFM89_024277	hypothetical protein IFM89_024277 [Coptis chinensis]
IFM89_019700	hypothetical protein IFM89_019700 [Coptis chinensis]
IFM89_022360	hypothetical protein IFM89_022360 [Coptis chinensis]
IFM89_038621	hypothetical protein IFM89_038621 [Coptis chinensis]
IFM89_034006	hypothetical protein IFM89_034006 [Coptis chinensis]
IFM89_012865	hypothetical protein IFM89_012865 [Coptis chinensis]
IFM89_011591	hypothetical protein IFM89_011591 [Coptis chinensis]
IFM89_011855	hypothetical protein IFM89_011855 [Coptis chinensis]
IFM89_013340	hypothetical protein IFM89_013340 [Coptis chinensis]
IFM89_024752	hypothetical protein IFM89_024752 [Coptis chinensis]
IFM89_022082	hypothetical protein IFM89_022082 [Coptis chinensis]
novel.5260	hypothetical protein L3X38_005680 [Prunus dulcis]
IFM89_031090	hypothetical protein IFM89_031090 [Coptis chinensis]
IFM89_030081	hypothetical protein IFM89_030081 [Coptis chinensis]
IFM89_031625	hypothetical protein IFM89_031625 [Coptis chinensis]
IFM89_032804	hypothetical protein IFM89_032804 [Coptis chinensis]
IFM89_019248	hypothetical protein IFM89_019248 [Coptis chinensis]
IFM89_004025	hypothetical protein IFM89_004025 [Coptis chinensis]
IFM89_039667	hypothetical protein AQUCO_02000613v1 [Aquilegia coerulea]
IFM89_000289	hypothetical protein IFM89_000289 [Coptis chinensis]
IFM89_002589	hypothetical protein IFM89_002589 [Coptis chinensis]
IFM89_012109	60S ribosomal protein L23-like [Impatiens glandulifera]
IFM89_013106	hypothetical protein IFM89_013106 [Coptis chinensis]
IFM89_018976	hypothetical protein IFM89_018976 [Coptis chinensis]
IFM89_010572	hypothetical protein IFM89_010572, partial [Coptis chinensis]
IFM89_033886	hypothetical protein IFM89_033886 [Coptis chinensis]
IFM89_037540	hypothetical protein IFM89_037540 [Coptis chinensis]
IFM89_007597	hypothetical protein IFM89_007597 [Coptis chinensis]
novel.2181	hypothetical protein AQUCO_01800027v1 [Aquilegia coerulea]
IFM89_021342	hypothetical protein IFM89_021342 [Coptis chinensis]
IFM89_020034	hypothetical protein IFM89_020034 [Coptis chinensis]
IFM89_031820	hypothetical protein IFM89_031820 [Coptis chinensis]
IFM89_030584	hypothetical protein IFM89_030584 [Coptis chinensis]
novel.7426	hypothetical protein IFM89_016831 [Coptis chinensis]
IFM89_025722	hypothetical protein IFM89_025722 [Coptis chinensis]
IFM89_028101	hypothetical protein IFM89_028101 [Coptis chinensis]
IFM89_009485	hypothetical protein IFM89_009485 [Coptis chinensis]
IFM89_031223	hypothetical protein IFM89_031223 [Coptis chinensis]
IFM89_029808	CMP-sialic acid transporter 1-like isoform X2 [Quercus suber]
novel.7627	hypothetical protein I3760_07G009500 [Carya illinoinensis]
IFM89_022883	hypothetical protein IFM89_022883 [Coptis chinensis]
IFM89_016825	hypothetical protein IFM89_016825 [Coptis chinensis]
novel.6327	hypothetical protein IFM89_039741 [Coptis chinensis]
novel.6687	uncharacterized protein LOC114278075 [Camellia sinensis]
novel.7359	hypothetical protein IFM89_003024 [Coptis chinensis]
IFM89_008088	hypothetical protein IFM89_008088 [Coptis chinensis]
IFM89_028744	hypothetical protein IFM89_028744 [Coptis chinensis]
IFM89_034888	hypothetical protein IFM89_034888 [Coptis chinensis]
IFM89_035402	hypothetical protein IFM89_035402, partial [Coptis chinensis]
IFM89_037838	hypothetical protein IFM89_037838 [Coptis chinensis]
IFM89_015051	hypothetical protein IFM89_015051 [Coptis chinensis]
IFM89_007860	hypothetical protein IFM89_007860 [Coptis chinensis]
novel.8252	hypothetical protein VITISV_016641 [Vitis vinifera]
IFM89_038786	hypothetical protein IFM89_038786 [Coptis chinensis]
novel.78	Plant/MNJ7-17 protein [Thalictrum thalictroides]
IFM89_009130	hypothetical protein IFM89_009130 [Coptis chinensis]
IFM89_000860	hypothetical protein IFM89_000860, partial [Coptis chinensis]
IFM89_032595	hypothetical protein IFM89_032595 [Coptis chinensis]
IFM89_024370	hypothetical protein IFM89_024370 [Coptis chinensis]
novel.6081	hypothetical protein IFM89_002080 [Coptis chinensis]
IFM89_023781	hypothetical protein IFM89_023781 [Coptis chinensis]
IFM89_006713	hypothetical protein IFM89_006713 [Coptis chinensis]
IFM89_021092	hypothetical protein IFM89_021092 [Coptis chinensis]
IFM89_006896	hypothetical protein IFM89_006896 [Coptis chinensis]
IFM89_025998	hypothetical protein IFM89_025998 [Coptis chinensis]
IFM89_017855	hypothetical protein IFM89_017855 [Coptis chinensis]
IFM89_006049	hypothetical protein IFM89_006049 [Coptis chinensis]
IFM89_033486	hypothetical protein IFM89_033486 [Coptis chinensis]
IFM89_029651	hypothetical protein IFM89_029651, partial [Coptis chinensis]
IFM89_035571	hypothetical protein IFM89_035571 [Coptis chinensis]
IFM89_006281	hypothetical protein IFM89_006281 [Coptis chinensis]
IFM89_004861	hypothetical protein IFM89_004861 [Coptis chinensis]
IFM89_006643	hypothetical protein IFM89_006643 [Coptis chinensis]
novel.6998	hypothetical protein IFM89_035159 [Coptis chinensis]
IFM89_033725	hypothetical protein IFM89_033725 [Coptis chinensis]
IFM89_019460	hypothetical protein IFM89_019460 [Coptis chinensis]
IFM89_023995	hypothetical protein IFM89_023995 [Coptis chinensis]
IFM89_002075	hypothetical protein IFM89_002075 [Coptis chinensis]
IFM89_015089	hypothetical protein IFM89_015089 [Coptis chinensis]
IFM89_020928	hypothetical protein IFM89_020928 [Coptis chinensis]
IFM89_021545	hypothetical protein IFM89_021545 [Coptis chinensis]
IFM89_011911	hypothetical protein IFM89_011911 [Coptis chinensis]
IFM89_020512	hypothetical protein IFM89_020512 [Coptis chinensis]
IFM89_005591	hypothetical protein IFM89_005591 [Coptis chinensis]
novel.8407	hypothetical protein IFM89_039501 [Coptis chinensis]
novel.8479	hypothetical protein AQUCO_05800148v1 [Aquilegia coerulea]
IFM89_029217	hypothetical protein IFM89_029217 [Coptis chinensis]
IFM89_039361	hypothetical protein IFM89_039361 [Coptis chinensis]
IFM89_021809	hypothetical protein IFM89_021809 [Coptis chinensis]
IFM89_036243	hypothetical protein IFM89_036243 [Coptis chinensis]
IFM89_011848	hypothetical protein IFM89_011848 [Coptis chinensis]
novel.6973	hypothetical protein IFM89_001672 [Coptis chinensis]
IFM89_026275	hypothetical protein IFM89_026275 [Coptis chinensis]
IFM89_020631	hypothetical protein IFM89_020631 [Coptis chinensis]
IFM89_038117	hypothetical protein IFM89_038117 [Coptis chinensis]
IFM89_014889	hypothetical protein IFM89_014889 [Coptis chinensis]
IFM89_018902	hypothetical protein IFM89_018902, partial [Coptis chinensis]
IFM89_035027	hypothetical protein IFM89_035027 [Coptis chinensis]
novel.6716	hypothetical protein AQUCO_00300256v1 [Aquilegia coerulea]
IFM89_030186	hypothetical protein IFM89_030186, partial [Coptis chinensis]
IFM89_002595	hypothetical protein IFM89_002595 [Coptis chinensis]
IFM89_015680	hypothetical protein IFM89_015680 [Coptis chinensis]
IFM89_039739	hypothetical protein IFM89_039739 [Coptis chinensis]
novel.6770	hypothetical protein IFM89_021374 [Coptis chinensis]
IFM89_035714	hypothetical protein IFM89_035714 [Coptis chinensis]
IFM89_001118	hypothetical protein IFM89_001118 [Coptis chinensis]
IFM89_023439	hypothetical protein IFM89_023439 [Coptis chinensis]
IFM89_000683	hypothetical protein IFM89_000683 [Coptis chinensis]
IFM89_017904	hypothetical protein IFM89_017904 [Coptis chinensis]
IFM89_033890	hypothetical protein IFM89_033890 [Coptis chinensis]
IFM89_012543	hypothetical protein IFM89_012543 [Coptis chinensis]
IFM89_019022	hypothetical protein IFM89_019022, partial [Coptis chinensis]
IFM89_037633	hypothetical protein IFM89_037633 [Coptis chinensis]
IFM89_038598	hypothetical protein IFM89_038598 [Coptis chinensis]
IFM89_032841	hypothetical protein IFM89_032841 [Coptis chinensis]
IFM89_037650	hypothetical protein IFM89_029119 [Coptis chinensis]
novel.8935	hypothetical protein L1887_41146 [Cichorium endivia]
IFM89_001874	hypothetical protein IFM89_001874 [Coptis chinensis]
IFM89_039714	hypothetical protein IFM89_039714 [Coptis chinensis]
IFM89_002545	hypothetical protein IFM89_002545 [Coptis chinensis]
novel.8462	Arginine decarboxylase [Thalictrum thalictroides]
IFM89_034822	hypothetical protein IFM89_034822 [Coptis chinensis]
IFM89_003932	hypothetical protein IFM89_003932 [Coptis chinensis]
IFM89_026277	hypothetical protein IFM89_026277 [Coptis chinensis]
IFM89_002822	hypothetical protein IFM89_002822 [Coptis chinensis]
novel.2655	hypothetical protein HHK36_014315 [Tetracentron sinense]
IFM89_007768	hypothetical protein IFM89_007768 [Coptis chinensis]
IFM89_006987	hypothetical protein IFM89_006987 [Coptis chinensis]
novel.4957	hypothetical protein AQUCO_03700243v1 [Aquilegia coerulea]
IFM89_016225	hypothetical protein IFM89_016225 [Coptis chinensis]
IFM89_009163	hypothetical protein IFM89_009163 [Coptis chinensis]
IFM89_002601	hypothetical protein IFM89_002601 [Coptis chinensis]
IFM89_029878	hypothetical protein IFM89_029878 [Coptis chinensis]
IFM89_032359	hypothetical protein IFM89_032359 [Coptis chinensis]
IFM89_034060	hypothetical protein IFM89_034060 [Coptis chinensis]
IFM89_000681	hypothetical protein IFM89_000681 [Coptis chinensis]
IFM89_000896	hypothetical protein IFM89_000896 [Coptis chinensis]
IFM89_020739	hypothetical protein IFM89_020739 [Coptis chinensis]
novel.4595	Ubiquitin-conjugating enzyme E2 variant 1A, partial [Dichanthelium oligosanthes]
IFM89_036015	hypothetical protein IFM89_036015 [Coptis chinensis]
IFM89_011232	hypothetical protein IFM89_011232 [Coptis chinensis]
IFM89_027898	histone H4 [Vibrio parahaemolyticus]
IFM89_036911	hypothetical protein IFM89_036911 [Coptis chinensis]
novel.1689	hypothetical protein GIB67_032381 [Kingdonia uniflora]
IFM89_009799	hypothetical protein IFM89_009799 [Coptis chinensis]
IFM89_031723	hypothetical protein IFM89_031723 [Coptis chinensis]
IFM89_014956	hypothetical protein IFM89_014956 [Coptis chinensis]
IFM89_038584	hypothetical protein IFM89_038584 [Coptis chinensis]
IFM89_024620	hypothetical protein IFM89_024620 [Coptis chinensis]
IFM89_006302	hypothetical protein IFM89_006302 [Coptis chinensis]
IFM89_024139	hypothetical protein AQUCO_05500006v1 [Aquilegia coerulea]
IFM89_008093	hypothetical protein IFM89_008093 [Coptis chinensis]
IFM89_013745	hypothetical protein IFM89_013745 [Coptis chinensis]
IFM89_013139	hypothetical protein IFM89_013139 [Coptis chinensis]
IFM89_018934	hypothetical protein IFM89_018934 [Coptis chinensis]
IFM89_028245	hypothetical protein IFM89_028245 [Coptis chinensis]
IFM89_028470	hypothetical protein IFM89_028470 [Coptis chinensis]
IFM89_023066	hypothetical protein IFM89_023066 [Coptis chinensis]
novel.8015	60S ribosomal protein L27 [Thalictrum thalictroides]
novel.8791	hypothetical protein F0562_009944 [Nyssa sinensis]
IFM89_002445	hypothetical protein IFM89_002445 [Coptis chinensis]
IFM89_029891	hypothetical protein IFM89_029891 [Coptis chinensis]
IFM89_031824	hypothetical protein IFM89_031824 [Coptis chinensis]
IFM89_038383	hypothetical protein IFM89_038383 [Coptis chinensis]
IFM89_039184	hypothetical protein IFM89_039184 [Coptis chinensis]
novel.4904	hypothetical protein IFM89_039386 [Coptis chinensis]
IFM89_039083	hypothetical protein IFM89_039083 [Coptis chinensis]
IFM89_006732	hypothetical protein IFM89_006732, partial [Coptis chinensis]
IFM89_005444	hypothetical protein IFM89_005444 [Coptis chinensis]
IFM89_011267	hypothetical protein IFM89_011267 [Coptis chinensis]
novel.2930	hypothetical protein IFM89_026022 [Coptis chinensis]
IFM89_009406	hypothetical protein IFM89_009406 [Coptis chinensis]
IFM89_002066	hypothetical protein IFM89_002066 [Coptis chinensis]
IFM89_008513	hypothetical protein IFM89_008513 [Coptis chinensis]
IFM89_025107	hypothetical protein IFM89_025107, partial [Coptis chinensis]
IFM89_000889	hypothetical protein IFM89_000889, partial [Coptis chinensis]
IFM89_027071	hypothetical protein IFM89_027071 [Coptis chinensis]
IFM89_039413	hypothetical protein IFM89_039413 [Coptis chinensis]
IFM89_018832	hypothetical protein IFM89_018832 [Coptis chinensis]
IFM89_011622	hypothetical protein IFM89_011622 [Coptis chinensis]
novel.5790	uncharacterized protein LOC113336795 [Papaver somniferum]
IFM89_033808	hypothetical protein IFM89_033808 [Coptis chinensis]
IFM89_007357	hypothetical protein IFM89_007357 [Coptis chinensis]
IFM89_020405	hypothetical protein IFM89_020405 [Coptis chinensis]
IFM89_031714	hypothetical protein IFM89_031714 [Coptis chinensis]
novel.1889	hypothetical protein AQUCO_02000292v1 [Aquilegia coerulea]
IFM89_004266	hypothetical protein IFM89_004266 [Coptis chinensis]
IFM89_027583	hypothetical protein IFM89_027583 [Coptis chinensis]
IFM89_029460	hypothetical protein IFM89_029460 [Coptis chinensis]
IFM89_006068	hypothetical protein IFM89_006068 [Coptis chinensis]
IFM89_031919	hypothetical protein IFM89_031919 [Coptis chinensis]
IFM89_006463	hypothetical protein IFM89_006463 [Coptis chinensis]
IFM89_028998	hypothetical protein IFM89_028998 [Coptis chinensis]
novel.5063	Reverse transcriptase domain [Arabidopsis suecica]
IFM89_009146	hypothetical protein IFM89_009146 [Coptis chinensis]
IFM89_017469	hypothetical protein IFM89_017469 [Coptis chinensis]
IFM89_022345	hypothetical protein IFM89_022345 [Coptis chinensis]
IFM89_017095	hypothetical protein IFM89_017095 [Coptis chinensis]
novel.5065	hypothetical protein IFM89_035374 [Coptis chinensis]
IFM89_010412	hypothetical protein IFM89_010412 [Coptis chinensis]
IFM89_010605	hypothetical protein IFM89_010605 [Coptis chinensis]
IFM89_000847	hypothetical protein IFM89_000847 [Coptis chinensis]
novel.3286	Reverse transcriptase RNA-dependent DNA polymerase [Arabidopsis thaliana x Arabidopsis arenosa]
novel.2541	hypothetical protein Lalb_Chr00c24g0406641 [Lupinus albus]
IFM89_012799	hypothetical protein IFM89_012799, partial [Coptis chinensis]
IFM89_028678	hypothetical protein IFM89_028678, partial [Coptis chinensis]
IFM89_034823	Double-stranded RNA-binding domain [Macleaya cordata]
IFM89_006308	hypothetical protein IFM89_006308 [Coptis chinensis]
novel.8789	hypothetical protein IFM89_034471 [Coptis chinensis]
IFM89_020099	histone H4 [Vibrio parahaemolyticus]
novel.8156	hypothetical protein IFM89_015144 [Coptis chinensis]
IFM89_016189	hypothetical protein IFM89_016189 [Coptis chinensis]
IFM89_007008	hypothetical protein IFM89_007008 [Coptis chinensis]
IFM89_027538	hypothetical protein IFM89_027538 [Coptis chinensis]
IFM89_021003	hypothetical protein IFM89_021003 [Coptis chinensis]
novel.4077	hypothetical protein IFM89_023247, partial [Coptis chinensis]
IFM89_036566	hypothetical protein IFM89_036566 [Coptis chinensis]
IFM89_015790	hypothetical protein IFM89_015790 [Coptis chinensis]
IFM89_029938	hypothetical protein IFM89_029938 [Coptis chinensis]
IFM89_018520	hypothetical protein IFM89_018520 [Coptis chinensis]
IFM89_011429	hypothetical protein IFM89_011429 [Coptis chinensis]
IFM89_025956	hypothetical protein IFM89_025956 [Coptis chinensis]
IFM89_020433	hypothetical protein IFM89_020433 [Coptis chinensis]
IFM89_004632	hypothetical protein IFM89_004632, partial [Coptis chinensis]
novel.5633	hypothetical protein AQUCO_00900621v1 [Aquilegia coerulea]
novel.8454	hypothetical protein [Gossypium armourianum]
IFM89_007698	hypothetical protein IFM89_007698 [Coptis chinensis]
IFM89_003676	hypothetical protein IFM89_003676 [Coptis chinensis]
IFM89_012298	hypothetical protein IFM89_012298 [Coptis chinensis]
IFM89_017030	hypothetical protein IFM89_017030 [Coptis chinensis]
IFM89_028115	hypothetical protein IFM89_028115 [Coptis chinensis]
IFM89_031911	hypothetical protein IFM89_031911 [Coptis chinensis]
IFM89_026988	hypothetical protein IFM89_026988 [Coptis chinensis]
IFM89_017820	hypothetical protein IFM89_017820 [Coptis chinensis]
IFM89_006668	hypothetical protein IFM89_006668 [Coptis chinensis]
IFM89_037456	hypothetical protein IFM89_037456 [Coptis chinensis]
IFM89_013846	hypothetical protein IFM89_013846 [Coptis chinensis]
IFM89_014913	hypothetical protein IFM89_014913 [Coptis chinensis]
IFM89_037140	hypothetical protein IFM89_037140 [Coptis chinensis]
IFM89_038030	hypothetical protein IFM89_038030 [Coptis chinensis]
IFM89_000514	hypothetical protein IFM89_000514 [Coptis chinensis]
IFM89_037017	hypothetical protein IFM89_037017 [Coptis chinensis]
IFM89_004715	hypothetical protein IFM89_004715 [Coptis chinensis]
IFM89_012729	hypothetical protein IFM89_012729 [Coptis chinensis]
IFM89_032902	hypothetical protein IFM89_032902 [Coptis chinensis]
IFM89_030849	hypothetical protein IFM89_030849 [Coptis chinensis]
IFM89_021711	hypothetical protein IFM89_021711 [Coptis chinensis]
IFM89_014036	hypothetical protein IFM89_014036 [Coptis chinensis]
IFM89_006457	hypothetical protein IFM89_006457 [Coptis chinensis]
IFM89_007334	hypothetical protein IFM89_007334 [Coptis chinensis]
IFM89_013509	hypothetical protein IFM89_013509, partial [Coptis chinensis]
IFM89_027814	hypothetical protein IFM89_027814 [Coptis chinensis]
IFM89_029855	hypothetical protein IFM89_029855 [Coptis chinensis]
novel.387	hypothetical protein RHGRI_025763 [Rhododendron griersonianum]
IFM89_000898	hypothetical protein IFM89_000898 [Coptis chinensis]
IFM89_000225	hypothetical protein IFM89_000225 [Coptis chinensis]
IFM89_020443	hypothetical protein IFM89_020443 [Coptis chinensis]
IFM89_035462	hypothetical protein IFM89_035462 [Coptis chinensis]
IFM89_024654	hypothetical protein IFM89_024654 [Coptis chinensis]
IFM89_018922	hypothetical protein IFM89_018922 [Coptis chinensis]
IFM89_012507	hypothetical protein IFM89_012507 [Coptis chinensis]
IFM89_039353	hypothetical protein IFM89_039353 [Coptis chinensis]
IFM89_017646	hypothetical protein IFM89_017646 [Coptis chinensis]
IFM89_017986	hypothetical protein IFM89_017986 [Coptis chinensis]
IFM89_036400	hypothetical protein IFM89_036400 [Coptis chinensis]
IFM89_007356	hypothetical protein IFM89_007356 [Coptis chinensis]
IFM89_013290	hypothetical protein IFM89_013290 [Coptis chinensis]
IFM89_022296	hypothetical protein IFM89_022296 [Coptis chinensis]
IFM89_002332	hypothetical protein IFM89_002332 [Coptis chinensis]
IFM89_025162	hypothetical protein IFM89_025162 [Coptis chinensis]
IFM89_035204	hypothetical protein IFM89_035204 [Coptis chinensis]
IFM89_035237	hypothetical protein IFM89_035237 [Coptis chinensis]
IFM89_015293	hypothetical protein IFM89_015293 [Coptis chinensis]
novel.5660	rust resistance kinase Lr10-like [Pistacia vera]
IFM89_032791	hypothetical protein IFM89_032791 [Coptis chinensis]
IFM89_013895	hypothetical protein IFM89_013895 [Coptis chinensis]
IFM89_015249	hypothetical protein IFM89_015249 [Coptis chinensis]
IFM89_030286	hypothetical protein IFM89_030286 [Coptis chinensis]
IFM89_036455	hypothetical protein IFM89_036455 [Coptis chinensis]
IFM89_022312	hypothetical protein IFM89_022312 [Coptis chinensis]
novel.8458	hypothetical protein AQUCO_05800115v1 [Aquilegia coerulea]
IFM89_033920	hypothetical protein IFM89_033920 [Coptis chinensis]
IFM89_001111	hypothetical protein IFM89_001111 [Coptis chinensis]
IFM89_009537	hypothetical protein IFM89_009537 [Coptis chinensis]
IFM89_021019	hypothetical protein IFM89_021019 [Coptis chinensis]
IFM89_038633	hypothetical protein IFM89_038633 [Coptis chinensis]
IFM89_015248	hypothetical protein IFM89_015248 [Coptis chinensis]
IFM89_000691	hypothetical protein IFM89_000691 [Coptis chinensis]
IFM89_004744	hypothetical protein IFM89_004744 [Coptis chinensis]
IFM89_019735	hypothetical protein IFM89_019735 [Coptis chinensis]
IFM89_002940	hypothetical protein IFM89_002940 [Coptis chinensis]
IFM89_039754	hypothetical protein IFM89_039754 [Coptis chinensis]
IFM89_003146	hypothetical protein IFM89_003146, partial [Coptis chinensis]
IFM89_015593	hypothetical protein IFM89_015593 [Coptis chinensis]
IFM89_031651	hypothetical protein IFM89_031651 [Coptis chinensis]
novel.8588	Heavy metal-associated isoprenylated plant protein [Thalictrum thalictroides]
IFM89_012377	hypothetical protein IFM89_012377, partial [Coptis chinensis]
IFM89_031571	hypothetical protein IFM89_031571 [Coptis chinensis]
IFM89_002144	hypothetical protein IFM89_002144 [Coptis chinensis]
IFM89_020478	hypothetical protein IFM89_020478 [Coptis chinensis]
IFM89_031573	hypothetical protein IFM89_031573 [Coptis chinensis]
IFM89_038692	hypothetical protein IFM89_038692 [Coptis chinensis]
IFM89_003983	hypothetical protein IFM89_003983 [Coptis chinensis]
IFM89_032191	hypothetical protein IFM89_032191 [Coptis chinensis]
IFM89_021553	hypothetical protein IFM89_021553 [Coptis chinensis]
IFM89_001737	hypothetical protein IFM89_001737 [Coptis chinensis]
IFM89_021682	hypothetical protein IFM89_021682 [Coptis chinensis]
IFM89_006831	hypothetical protein IFM89_006831 [Coptis chinensis]
IFM89_004406	hypothetical protein IFM89_021032 [Coptis chinensis]
IFM89_028535	hypothetical protein IFM89_028535 [Coptis chinensis]
IFM89_029625	hypothetical protein IFM89_029625 [Coptis chinensis]
IFM89_021097	hypothetical protein IFM89_021097 [Coptis chinensis]
IFM89_039482	hypothetical protein IFM89_039482 [Coptis chinensis]
IFM89_035764	hypothetical protein IFM89_035764 [Coptis chinensis]
IFM89_033110	hypothetical protein IFM89_033110 [Coptis chinensis]
IFM89_024428	hypothetical protein IFM89_024428 [Coptis chinensis]
IFM89_017997	hypothetical protein IFM89_017997, partial [Coptis chinensis]
IFM89_037792	hypothetical protein IFM89_037792 [Coptis chinensis]
IFM89_008075	hypothetical protein IFM89_008075, partial [Coptis chinensis]
IFM89_017280	hypothetical protein IFM89_017280 [Coptis chinensis]
IFM89_019215	hypothetical protein IFM89_019215 [Coptis chinensis]
IFM89_010625	hypothetical protein IFM89_010625 [Coptis chinensis]
IFM89_011300	hypothetical protein IFM89_011300 [Coptis chinensis]
IFM89_026721	hypothetical protein IFM89_026721 [Coptis chinensis]
IFM89_002613	hypothetical protein IFM89_002613, partial [Coptis chinensis]
IFM89_016919	hypothetical protein IFM89_016919 [Coptis chinensis]
IFM89_001779	hypothetical protein IFM89_001779 [Coptis chinensis]
IFM89_019826	hypothetical protein IFM89_019826, partial [Coptis chinensis]
IFM89_003620	hypothetical protein IFM89_003620 [Coptis chinensis]
IFM89_021223	hypothetical protein IFM89_021223 [Coptis chinensis]
IFM89_014087	hypothetical protein IFM89_014087 [Coptis chinensis]
IFM89_014953	hypothetical protein IFM89_014953 [Coptis chinensis]
IFM89_006665	hypothetical protein IFM89_006665 [Coptis chinensis]
IFM89_016612	hypothetical protein IFM89_016612 [Coptis chinensis]
IFM89_005720	hypothetical protein IFM89_005720 [Coptis chinensis]
IFM89_004137	hypothetical protein IFM89_004137 [Coptis chinensis]
IFM89_027221	hypothetical protein IFM89_027221 [Coptis chinensis]
IFM89_017253	hypothetical protein IFM89_017253 [Coptis chinensis]
IFM89_002021	hypothetical protein IFM89_002021 [Coptis chinensis]
IFM89_017530	hypothetical protein IFM89_017530 [Coptis chinensis]
IFM89_031474	hypothetical protein IFM89_031474 [Coptis chinensis]
IFM89_003837	hypothetical protein IFM89_003837, partial [Coptis chinensis]
IFM89_039625	hypothetical protein IFM89_039625 [Coptis chinensis]
IFM89_014662	hypothetical protein IFM89_014662 [Coptis chinensis]
IFM89_002273	hypothetical protein IFM89_002273 [Coptis chinensis]
novel.258	hypothetical protein BHE74_00036383, partial [Ensete ventricosum]
novel.7140	hypothetical protein IFM89_008564, partial [Coptis chinensis]
IFM89_033532	hypothetical protein IFM89_033532 [Coptis chinensis]
IFM89_024985	hypothetical protein IFM89_024985 [Coptis chinensis]
IFM89_014739	hypothetical protein IFM89_014739 [Coptis chinensis]
IFM89_010848	hypothetical protein IFM89_039500 [Coptis chinensis]
IFM89_011721	hypothetical protein IFM89_011721 [Coptis chinensis]
IFM89_023373	hypothetical protein IFM89_023373 [Coptis chinensis]
IFM89_022837	hypothetical protein IFM89_022837 [Coptis chinensis]
IFM89_038987	hypothetical protein IFM89_038987 [Coptis chinensis]
IFM89_036516	hypothetical protein IFM89_036516 [Coptis chinensis]
IFM89_032303	hypothetical protein IFM89_032303 [Coptis chinensis]
IFM89_017320	hypothetical protein IFM89_017320 [Coptis chinensis]
IFM89_006126	hypothetical protein IFM89_006126 [Coptis chinensis]
IFM89_006686	hypothetical protein IFM89_006686 [Coptis chinensis]
IFM89_030363	hypothetical protein IFM89_030363 [Coptis chinensis]
IFM89_013248	hypothetical protein IFM89_013248 [Coptis chinensis]
IFM89_023601	hypothetical protein IFM89_023601 [Coptis chinensis]
IFM89_023908	hypothetical protein IFM89_017203 [Coptis chinensis]
[truncated: 9,440 more rows]
