# Supplementary material for: Transcriptome and Metabolome Analysis of Isoquinoline Alkaloid Biosynthesis of Coptis chinensis in Different Years
Source: Genes (Basel). 2023 Dec 18;14(12):2232. doi: 10.3390/genes14122232 (PMC10742649; doi:10.3390/genes14122232)
Supplement: Supplementary file 1 [file genes-14-02232-s001.zip › Supplementary Table S4 Genes annotation in KOG.xlsx]

## Sheet: Sheet1
query	subject	evalue	KOG	KOGFunction	Classification	Code	CodeFunction
IFM89_016960	At3g62980	0	KOG1947	Leucine rich repeat proteins, some proteins contain F-box	POORLY CHARACTERIZED	R	General function prediction only
IFM89_011601	At1g25510	1.41e-209	KOG1339	Aspartyl protease	CELLULAR PROCESSES AND SIGNALING	O	Posttranslational modification, protein turnover, chaperones
IFM89_028660	At1g06570	1.4e-229	KOG0638	4-hydroxyphenylpyruvate dioxygenase	METABOLISM	E	Amino acid transport and metabolism
IFM89_004116	At3g10600	4.78e-276	KOG1286	Amino acid transporters	METABOLISM	E	Amino acid transport and metabolism
IFM89_018130	At5g27690	5.2e-26	KOG1603	Copper chaperone	METABOLISM	P	Inorganic ion transport and metabolism
IFM89_034725	At2g39130	3.49e-212	KOG1303	Amino acid transporters	METABOLISM	E	Amino acid transport and metabolism
IFM89_025626	At1g68320	1.31e-79	KOG0048	Transcription factor, Myb superfamily	INFORMATION STORAGE AND PROCESSING	K	Transcription
IFM89_038438	At1g21410	3.1e-86	KOG1947	Leucine rich repeat proteins, some proteins contain F-box	POORLY CHARACTERIZED	R	General function prediction only
IFM89_014288	At5g50600	3.1e-103	KOG1205	Predicted dehydrogenase	METABOLISM	Q	Secondary metabolites biosynthesis, transport and catabolism
novel.3090	At4g22840	2.77e-16	KOG2718	Na+-bile acid cotransporter	METABOLISM	P	Inorganic ion transport and metabolism
IFM89_014928	At1g48600	2.02e-298	KOG1269	SAM-dependent methyltransferases	METABOLISM	I	Lipid transport and metabolism
IFM89_037381	At2g45570	1.15e-114	KOG0156	Cytochrome P450 CYP2 subfamily	METABOLISM	Q	Secondary metabolites biosynthesis, transport and catabolism
IFM89_002418	At1g20823	3.31e-65	KOG0800	FOG: Predicted E3 ubiquitin ligase	CELLULAR PROCESSES AND SIGNALING	O	Posttranslational modification, protein turnover, chaperones
IFM89_001988	At3g19270	2.74e-236	KOG0157	Cytochrome P450 CYP4/CYP19/CYP26 subfamilies	METABOLISM	Q	Secondary metabolites biosynthesis, transport and catabolism
IFM89_009523	At3g59410	6.37e-07	KOG1035	eIF-2alpha kinase GCN2	INFORMATION STORAGE AND PROCESSING	J	Translation, ribosomal structure and biogenesis
IFM89_029031	At1g67940	4.57e-123	KOG0055	Multidrug/pheromone exporter, ABC superfamily	METABOLISM	Q	Secondary metabolites biosynthesis, transport and catabolism
IFM89_005779	At4g36380	5.77e-206	KOG0157	Cytochrome P450 CYP4/CYP19/CYP26 subfamilies	METABOLISM	Q	Secondary metabolites biosynthesis, transport and catabolism
IFM89_030295	At5g42270	0	KOG0731	AAA+-type ATPase containing the peptidase M41 domain	CELLULAR PROCESSES AND SIGNALING	O	Posttranslational modification, protein turnover, chaperones
novel.6557	At3g29100	1.92e-13	KOG1666	V-SNARE	CELLULAR PROCESSES AND SIGNALING	U	Intracellular trafficking, secretion, and vesicular transport
IFM89_019818	At3g43850	1.56e-21	KOG4210	Nuclear localization sequence binding protein	INFORMATION STORAGE AND PROCESSING	K	Transcription
IFM89_033856	At3g01540	1.48e-237	KOG0331	ATP-dependent RNA helicase	INFORMATION STORAGE AND PROCESSING	A	RNA processing and modification
IFM89_038178	At5g62950	3.37e-36	KOG4168	Predicted RNA polymerase III subunit C17	INFORMATION STORAGE AND PROCESSING	K	Transcription
IFM89_033983	At4g36040	9.53e-36	KOG0712	Molecular chaperone (DnaJ superfamily)	CELLULAR PROCESSES AND SIGNALING	O	Posttranslational modification, protein turnover, chaperones
IFM89_015272	At5g42820	7.19e-122	KOG2202	U2 snRNP splicing factor, small subunit, and related proteins	INFORMATION STORAGE AND PROCESSING	A	RNA processing and modification
IFM89_023516	At1g67700	1.25e-82	KOG2089	Metalloendopeptidase family - saccharolysin & thimet oligopeptidase	CELLULAR PROCESSES AND SIGNALING	O	Posttranslational modification, protein turnover, chaperones
novel.6789	At1g55870	2.49e-20	KOG1990	Poly(A)-specific exoribonuclease PARN	INFORMATION STORAGE AND PROCESSING	L	Replication, recombination and repair
IFM89_034846	At3g23990	6.77e-119	KOG0356	Mitochondrial chaperonin, Cpn60/Hsp60p	CELLULAR PROCESSES AND SIGNALING	O	Posttranslational modification, protein turnover, chaperones
IFM89_004602	At3g30180	2.12e-207	KOG0157	Cytochrome P450 CYP4/CYP19/CYP26 subfamilies	METABOLISM	Q	Secondary metabolites biosynthesis, transport and catabolism
IFM89_007330	At1g54290	2.15e-69	KOG1770	Translation initiation factor 1 (eIF-1/SUI1)	INFORMATION STORAGE AND PROCESSING	J	Translation, ribosomal structure and biogenesis
IFM89_002224	At1g03090	0	KOG0238	3-Methylcrotonyl-CoA carboxylase, biotin-containing subunit/Propionyl-CoA carboxylase, alpha chain/Acetyl-CoA carboxylase, biotin carboxylase subunit	METABOLISM	I	Lipid transport and metabolism
IFM89_030593	At1g62810	0	KOG1186	Copper amine oxidase	METABOLISM	Q	Secondary metabolites biosynthesis, transport and catabolism
IFM89_018380	At3g18770	3.19e-129	KOG4573	Phosphoprotein involved in cytoplasm to vacuole targeting and autophagy	CELLULAR PROCESSES AND SIGNALING	U	Intracellular trafficking, secretion, and vesicular transport
IFM89_012949	At1g65060	2.67e-237	KOG1176	Acyl-CoA synthetase	METABOLISM	I	Lipid transport and metabolism
IFM89_012393	At5g08080	6.04e-135	KOG0810	SNARE protein Syntaxin 1 and related proteins	CELLULAR PROCESSES AND SIGNALING	U	Intracellular trafficking, secretion, and vesicular transport
IFM89_005116	At4g10260	1.06e-169	KOG2855	Ribokinase	METABOLISM	G	Carbohydrate transport and metabolism
novel.8106	At4g08150	3.17e-22	KOG0773	Transcription factor MEIS1 and related HOX domain proteins	INFORMATION STORAGE AND PROCESSING	K	Transcription
IFM89_016433	At5g05080	3.56e-60	KOG0423	Ubiquitin-protein ligase	CELLULAR PROCESSES AND SIGNALING	O	Posttranslational modification, protein turnover, chaperones
novel.2125	Hs16904381	6.07e-24	KOG1787	Kinase A-anchor protein Neurobeachin and related BEACH and WD40 repeat proteins	CELLULAR PROCESSES AND SIGNALING	U	Intracellular trafficking, secretion, and vesicular transport
novel.8345	At3g59830	6.25e-35	KOG0192	Tyrosine kinase specific for activated (GTP-bound) p21cdc42Hs	CELLULAR PROCESSES AND SIGNALING	T	Signal transduction mechanisms
IFM89_021560	At4g34200	1.32e-260	KOG0068	D-3-phosphoglycerate dehydrogenase, D-isomer-specific 2-hydroxy acid dehydrogenase superfamily	METABOLISM	E	Amino acid transport and metabolism
IFM89_002458	At5g65980	7.47e-171	KOG2722	Predicted membrane protein	POORLY CHARACTERIZED	S	Function unknown
IFM89_014217	At3g01120	9.27e-230	KOG0053	Cystathionine beta-lyases/cystathionine gamma-synthases	METABOLISM	E	Amino acid transport and metabolism
novel.8113	At5g65760	7.06e-52	KOG2183	Prolylcarboxypeptidase (angiotensinase C)	CELLULAR PROCESSES AND SIGNALING	O	Posttranslational modification, protein turnover, chaperones
novel.3956	At5g41060	4.58e-21	KOG1311	DHHC-type Zn-finger proteins	POORLY CHARACTERIZED	R	General function prediction only
IFM89_032854	At2g45560	2.2e-24	KOG0156	Cytochrome P450 CYP2 subfamily	METABOLISM	Q	Secondary metabolites biosynthesis, transport and catabolism
IFM89_034180	At1g80920	3.99e-28	KOG0715	Molecular chaperone (DnaJ superfamily)	CELLULAR PROCESSES AND SIGNALING	O	Posttranslational modification, protein turnover, chaperones
IFM89_009131	At3g63080	3.95e-80	KOG1651	Glutathione peroxidase	CELLULAR PROCESSES AND SIGNALING	O	Posttranslational modification, protein turnover, chaperones
IFM89_022620	At5g44640	1.28e-158	KOG0626	Beta-glucosidase, lactase phlorizinhydrolase, and related proteins	METABOLISM	G	Carbohydrate transport and metabolism
IFM89_036526	At3g52820	1.79e-186	KOG1378	Purple acid phosphatase	METABOLISM	G	Carbohydrate transport and metabolism
IFM89_010682	At2g36880	3.03e-271	KOG1506	S-adenosylmethionine synthetase	METABOLISM	H	Coenzyme transport and metabolism
IFM89_012538	At1g66680	1.69e-143	KOG1271	Methyltransferases	POORLY CHARACTERIZED	R	General function prediction only
novel.8045	At1g20390	1.1e-92	KOG0017	FOG: Transposon-encoded proteins with TYA, reverse transcriptase, integrase domains in various combinations	POORLY CHARACTERIZED	R	General function prediction only
IFM89_003004	At3g52120	4.88e-60	KOG0965	Predicted RNA-binding protein, contains SWAP and G-patch domains	POORLY CHARACTERIZED	R	General function prediction only
IFM89_011005	At1g75100	9.82e-40	KOG0431	Auxilin-like protein and related proteins containing DnaJ domain	POORLY CHARACTERIZED	R	General function prediction only
IFM89_025610	At2g47180	9.3e-197	KOG1950	Glycosyl transferase, family 8 - glycogenin	METABOLISM	G	Carbohydrate transport and metabolism
IFM89_015797	At1g56210	1.87e-27	KOG1603	Copper chaperone	METABOLISM	P	Inorganic ion transport and metabolism
IFM89_001641	At3g18670	3.79e-110	KOG0504	FOG: Ankyrin repeat	POORLY CHARACTERIZED	R	General function prediction only
IFM89_009002	At3g16150	1.18e-169	KOG1592	Asparaginase	METABOLISM	E	Amino acid transport and metabolism
IFM89_031645	At3g26590	7.87e-222	KOG1347	Uncharacterized membrane protein, predicted efflux pump	POORLY CHARACTERIZED	R	General function prediction only
IFM89_036586	At2g37630	3.74e-148	KOG0048	Transcription factor, Myb superfamily	INFORMATION STORAGE AND PROCESSING	K	Transcription
IFM89_003647	At2g17440	4.18e-33	KOG0619	FOG: Leucine rich repeat	POORLY CHARACTERIZED	R	General function prediction only
IFM89_018830	At4g30560	6.17e-74	KOG0498	K+-channel ERG and related proteins, contain PAS/PAC sensor domain	METABOLISM	P	Inorganic ion transport and metabolism
IFM89_026391	At4g27470	2.3e-38	KOG0823	Predicted E3 ubiquitin ligase	CELLULAR PROCESSES AND SIGNALING	O	Posttranslational modification, protein turnover, chaperones
IFM89_024738	At3g05350	2.06e-44	KOG2413	Xaa-Pro aminopeptidase	METABOLISM	E	Amino acid transport and metabolism
IFM89_017557	At1g03220	5.85e-76	KOG1339	Aspartyl protease	CELLULAR PROCESSES AND SIGNALING	O	Posttranslational modification, protein turnover, chaperones
IFM89_002575	Hs7705437	3.02e-54	KOG3492	Ribosome biogenesis protein NIP7	INFORMATION STORAGE AND PROCESSING	J	Translation, ribosomal structure and biogenesis
IFM89_029133	At3g50070	2.13e-108	KOG0656	G1/S-specific cyclin D	CELLULAR PROCESSES AND SIGNALING	D	Cell cycle control, cell division, chromosome partitioning
IFM89_017076	At5g58070	1.95e-53	KOG4824	Apolipoprotein D/Lipocalin	CELLULAR PROCESSES AND SIGNALING	M	Cell wall/membrane/envelope biogenesis
IFM89_037840	At1g76880	4.58e-63	KOG4282	Transcription factor GT-2 and related proteins, contains trihelix DNA-binding/SANT domain	INFORMATION STORAGE AND PROCESSING	K	Transcription
IFM89_003532	At5g63530	1.6e-25	KOG1603	Copper chaperone	METABOLISM	P	Inorganic ion transport and metabolism
IFM89_016128	At1g67310	2.66e-237	KOG0520	Uncharacterized conserved protein, contains IPT/TIG domain	POORLY CHARACTERIZED	S	Function unknown
IFM89_021509	At2g27290	9.72e-65	KOG4526	Predicted membrane protein	POORLY CHARACTERIZED	S	Function unknown
IFM89_035490	At1g23090	1.01e-297	KOG0236	Sulfate/bicarbonate/oxalate exchanger SAT-1 and related transporters (SLC26 family)	METABOLISM	P	Inorganic ion transport and metabolism
IFM89_013994	At5g03180	5.05e-79	KOG1609	Protein involved in mRNA turnover and stability	INFORMATION STORAGE AND PROCESSING	A	RNA processing and modification
IFM89_026392	At3g15360	9.46e-56	KOG0910	Thioredoxin-like protein	CELLULAR PROCESSES AND SIGNALING	O	Posttranslational modification, protein turnover, chaperones
IFM89_006966	At5g19450	1.29e-212	KOG0032	Ca2+/calmodulin-dependent protein kinase, EF-Hand protein superfamily	CELLULAR PROCESSES AND SIGNALING	T	Signal transduction mechanisms
IFM89_033080	At5g43810	0	KOG1041	Translation initiation factor 2C (eIF-2C) and related proteins	INFORMATION STORAGE AND PROCESSING	J	Translation, ribosomal structure and biogenesis
IFM89_005863	At3g01750	1.13e-170	KOG0504	FOG: Ankyrin repeat	POORLY CHARACTERIZED	R	General function prediction only
IFM89_011292	At5g27730	1.21e-220	KOG4683	Uncharacterized conserved protein	POORLY CHARACTERIZED	S	Function unknown
IFM89_008058	At3g29320	0	KOG2099	Glycogen phosphorylase	METABOLISM	G	Carbohydrate transport and metabolism
IFM89_018100	At1g72160	1.11e-48	KOG1471	Phosphatidylinositol transfer protein SEC14 and related proteins	METABOLISM	I	Lipid transport and metabolism
IFM89_012573	At5g12250	1.19e-197	KOG1375	Beta tubulin	CELLULAR PROCESSES AND SIGNALING	Z	Cytoskeleton
IFM89_022468	At5g11160	2.88e-95	KOG1712	Adenine phosphoribosyl transferases	METABOLISM	F	Nucleotide transport and metabolism
IFM89_008462	At5g06900	1.5e-144	KOG0156	Cytochrome P450 CYP2 subfamily	METABOLISM	Q	Secondary metabolites biosynthesis, transport and catabolism
IFM89_007767	At4g12310	1.32e-120	KOG0156	Cytochrome P450 CYP2 subfamily	METABOLISM	Q	Secondary metabolites biosynthesis, transport and catabolism
IFM89_004668	At5g42260	8.91e-31	KOG0626	Beta-glucosidase, lactase phlorizinhydrolase, and related proteins	METABOLISM	G	Carbohydrate transport and metabolism
IFM89_010966	At4g36850	2.47e-136	KOG2913	Predicted membrane protein	POORLY CHARACTERIZED	S	Function unknown
IFM89_037096	At5g54010	1.56e-112	KOG1192	UDP-glucuronosyl and UDP-glucosyl transferase	METABOLISM	G	Carbohydrate transport and metabolism
IFM89_029287	At5g63530	2.09e-72	KOG1603	Copper chaperone	METABOLISM	P	Inorganic ion transport and metabolism
IFM89_006127	At3g48700	1.17e-92	KOG1515	Arylacetamide deacetylase	CELLULAR PROCESSES AND SIGNALING	V	Defense mechanisms
IFM89_037850	At1g33230	8.55e-158	KOG4758	Predicted membrane protein	POORLY CHARACTERIZED	R	General function prediction only
IFM89_031309	At3g47520	6.12e-196	KOG1494	NAD-dependent malate dehydrogenase	METABOLISM	C	Energy production and conversion
novel.8120	At4g08150	1.43e-32	KOG0773	Transcription factor MEIS1 and related HOX domain proteins	INFORMATION STORAGE AND PROCESSING	K	Transcription
IFM89_038746	At2g17630	1.73e-206	KOG2790	Phosphoserine aminotransferase	METABOLISM	H	Coenzyme transport and metabolism
IFM89_018609	At2g37040	0	KOG0222	Phenylalanine and histidine ammonia-lyase	METABOLISM	Q	Secondary metabolites biosynthesis, transport and catabolism
IFM89_009083	At2g38130	9.41e-93	KOG3139	N-acetyltransferase	POORLY CHARACTERIZED	R	General function prediction only
IFM89_033162	At4g32850	3.53e-297	KOG2245	Poly(A) polymerase and related nucleotidyltransferases	INFORMATION STORAGE AND PROCESSING	A	RNA processing and modification
IFM89_032849	At3g19910	1.78e-07	KOG0800	FOG: Predicted E3 ubiquitin ligase	CELLULAR PROCESSES AND SIGNALING	O	Posttranslational modification, protein turnover, chaperones
IFM89_016480	At5g18600	4.75e-39	KOG1752	Glutaredoxin and related proteins	CELLULAR PROCESSES AND SIGNALING	O	Posttranslational modification, protein turnover, chaperones
IFM89_024488	At1g72160	9.44e-59	KOG1471	Phosphatidylinositol transfer protein SEC14 and related proteins	METABOLISM	I	Lipid transport and metabolism
IFM89_019462	At1g15710	6.66e-118	KOG2380	Prephenate dehydrogenase (NADP+)	METABOLISM	E	Amino acid transport and metabolism
IFM89_008136	At5g21170	1.96e-113	KOG1616	Protein involved in Snf1 protein kinase complex assembly	METABOLISM	G	Carbohydrate transport and metabolism
IFM89_010632	At2g18600	3.8e-106	KOG0420	Ubiquitin-protein ligase	CELLULAR PROCESSES AND SIGNALING	O	Posttranslational modification, protein turnover, chaperones
novel.4438	At2g33840_1	8.45e-30	KOG2144	Tyrosyl-tRNA synthetase, cytoplasmic	INFORMATION STORAGE AND PROCESSING	J	Translation, ribosomal structure and biogenesis
IFM89_015844	At4g15700	8.01e-45	KOG1752	Glutaredoxin and related proteins	CELLULAR PROCESSES AND SIGNALING	O	Posttranslational modification, protein turnover, chaperones
IFM89_018751	At1g12780	5.18e-228	KOG1371	UDP-glucose 4-epimerase/UDP-sulfoquinovose synthase	CELLULAR PROCESSES AND SIGNALING	M	Cell wall/membrane/envelope biogenesis
IFM89_037117	At1g05010	5.02e-181	KOG0143	Iron/ascorbate family oxidoreductases	METABOLISM	Q	Secondary metabolites biosynthesis, transport and catabolism
IFM89_029861	At1g01490	1.89e-40	KOG1603	Copper chaperone	METABOLISM	P	Inorganic ion transport and metabolism
IFM89_038112	At2g44130	7.92e-66	KOG1072	FOG: Kelch repeat	POORLY CHARACTERIZED	R	General function prediction only
IFM89_023647	At4g13940	0	KOG1370	S-adenosylhomocysteine hydrolase	METABOLISM	H	Coenzyme transport and metabolism
IFM89_018004	At1g76690	2.54e-213	KOG0134	NADH:flavin oxidoreductase/12-oxophytodienoate reductase	METABOLISM	C	Energy production and conversion
IFM89_032024	At5g50160	6.89e-204	KOG0039	Ferric reductase, NADH/NADPH oxidase and related proteins	METABOLISM	P	Inorganic ion transport and metabolism
IFM89_034758	At2g37040	0	KOG0222	Phenylalanine and histidine ammonia-lyase	METABOLISM	Q	Secondary metabolites biosynthesis, transport and catabolism
IFM89_015177	At1g53590	2.35e-235	KOG1012	Ca2+-dependent lipid-binding protein CLB1/vesicle protein vp115/Granuphilin A, contains C2 domain	POORLY CHARACTERIZED	R	General function prediction only
IFM89_027461	At5g20930	1.07e-26	KOG1151	Tousled-like protein kinase	CELLULAR PROCESSES AND SIGNALING	T	Signal transduction mechanisms
IFM89_030785	At2g24360	3.08e-108	KOG0192	Tyrosine kinase specific for activated (GTP-bound) p21cdc42Hs	CELLULAR PROCESSES AND SIGNALING	T	Signal transduction mechanisms
IFM89_011511	At1g10070	3.79e-167	KOG0975	Branched chain aminotransferase BCAT1, pyridoxal phosphate enzymes type IV superfamily	METABOLISM	E	Amino acid transport and metabolism
IFM89_009468	At1g47530	4.78e-188	KOG1347	Uncharacterized membrane protein, predicted efflux pump	POORLY CHARACTERIZED	R	General function prediction only
IFM89_039147	At2g30600	9.78e-158	KOG4441	Proteins containing BTB/POZ and Kelch domains, involved in regulatory/signal transduction processes	CELLULAR PROCESSES AND SIGNALING	T	Signal transduction mechanisms
IFM89_014053	At1g63770	3.75e-252	KOG1046	Puromycin-sensitive aminopeptidase and related aminopeptidases	METABOLISM	E	Amino acid transport and metabolism
IFM89_039815	At2g20340	2.01e-214	KOG0628	Aromatic-L-amino-acid/L-histidine decarboxylase	METABOLISM	E	Amino acid transport and metabolism
IFM89_023101	At4g35160	2.65e-70	KOG3178	Hydroxyindole-O-methyltransferase and related SAM-dependent methyltransferases	POORLY CHARACTERIZED	R	General function prediction only
IFM89_015541	At1g65660	1.38e-299	KOG2560	RNA splicing factor - Slu7p	INFORMATION STORAGE AND PROCESSING	A	RNA processing and modification
IFM89_023100	At2g45570	3.22e-79	KOG0156	Cytochrome P450 CYP2 subfamily	METABOLISM	Q	Secondary metabolites biosynthesis, transport and catabolism
IFM89_010054	At4g31940	4.9e-203	KOG0156	Cytochrome P450 CYP2 subfamily	METABOLISM	Q	Secondary metabolites biosynthesis, transport and catabolism
novel.2349	At3g11980	1.55e-10	KOG1221	Acyl-CoA reductase	METABOLISM	I	Lipid transport and metabolism
IFM89_039615	At2g02400	1.19e-160	KOG1502	Flavonol reductase/cinnamoyl-CoA reductase	CELLULAR PROCESSES AND SIGNALING	V	Defense mechanisms
IFM89_037826	At5g56940	9.12e-24	KOG3419	Mitochondrial/chloroplast ribosomal protein S16	INFORMATION STORAGE AND PROCESSING	J	Translation, ribosomal structure and biogenesis
IFM89_030333	At2g24270	0	KOG2450	Aldehyde dehydrogenase	METABOLISM	C	Energy production and conversion
IFM89_007361	At3g59970	0	KOG0564	5,10-methylenetetrahydrofolate reductase	METABOLISM	E	Amino acid transport and metabolism
IFM89_035697	At5g49980	5.34e-238	KOG1947	Leucine rich repeat proteins, some proteins contain F-box	POORLY CHARACTERIZED	R	General function prediction only
IFM89_038459	At1g20920	0	KOG0334	RNA helicase	INFORMATION STORAGE AND PROCESSING	A	RNA processing and modification
IFM89_019880	At1g25510	8.65e-146	KOG1339	Aspartyl protease	CELLULAR PROCESSES AND SIGNALING	O	Posttranslational modification, protein turnover, chaperones
IFM89_014779	At4g39050	0	KOG0242	Kinesin-like protein	CELLULAR PROCESSES AND SIGNALING	Z	Cytoskeleton
IFM89_025630	At3g02570	1.71e-186	KOG2757	Mannose-6-phosphate isomerase	METABOLISM	G	Carbohydrate transport and metabolism
IFM89_037011	At1g64920	2.67e-123	KOG1192	UDP-glucuronosyl and UDP-glucosyl transferase	METABOLISM	G	Carbohydrate transport and metabolism
novel.2751	At3g22200	1.79e-22	KOG1404	Alanine-glyoxylate aminotransferase AGT2	METABOLISM	E	Amino acid transport and metabolism
IFM89_030786	At4g31170	3.19e-63	KOG0192	Tyrosine kinase specific for activated (GTP-bound) p21cdc42Hs	CELLULAR PROCESSES AND SIGNALING	T	Signal transduction mechanisms
IFM89_033569	At5g53970	5.59e-179	KOG0259	Tyrosine aminotransferase	METABOLISM	E	Amino acid transport and metabolism
IFM89_016697	At5g67500	9.41e-113	KOG3126	Porin/voltage-dependent anion-selective channel protein	METABOLISM	P	Inorganic ion transport and metabolism
IFM89_031971	At2g30490	0	KOG0156	Cytochrome P450 CYP2 subfamily	METABOLISM	Q	Secondary metabolites biosynthesis, transport and catabolism
IFM89_023651	At4g14040	2.32e-295	KOG0918	Selenium-binding protein	METABOLISM	P	Inorganic ion transport and metabolism
IFM89_012660	At3g27325	3.26e-223	KOG3724	Negative regulator of COPII vesicle formation	CELLULAR PROCESSES AND SIGNALING	U	Intracellular trafficking, secretion, and vesicular transport
IFM89_023660	At4g13980_2	4.08e-133	KOG0627	Heat shock transcription factor	INFORMATION STORAGE AND PROCESSING	K	Transcription
IFM89_002797	At1g17020	8.8e-104	KOG0143	Iron/ascorbate family oxidoreductases	METABOLISM	Q	Secondary metabolites biosynthesis, transport and catabolism
IFM89_007051	At5g49980	1.09e-288	KOG1947	Leucine rich repeat proteins, some proteins contain F-box	POORLY CHARACTERIZED	R	General function prediction only
IFM89_034510	At4g16780	7.17e-101	KOG0483	Transcription factor HEX, contains HOX and HALZ domains	INFORMATION STORAGE AND PROCESSING	K	Transcription
IFM89_011384	At4g27470	2.15e-44	KOG0823	Predicted E3 ubiquitin ligase	CELLULAR PROCESSES AND SIGNALING	O	Posttranslational modification, protein turnover, chaperones
IFM89_031810	At5g44670	7.43e-151	KOG4735	Extracellular protein with conserved cysteines	POORLY CHARACTERIZED	S	Function unknown
IFM89_020489	At1g25440	2.74e-90	KOG1601	GATA-4/5/6 transcription factors	INFORMATION STORAGE AND PROCESSING	K	Transcription
IFM89_002045	At2g47140	2.49e-72	KOG0725	Reductases with broad range of substrate specificities	POORLY CHARACTERIZED	R	General function prediction only
IFM89_002260	At3g51895	0	KOG0236	Sulfate/bicarbonate/oxalate exchanger SAT-1 and related transporters (SLC26 family)	METABOLISM	P	Inorganic ion transport and metabolism
IFM89_031724	At2g45300	7.7e-220	KOG0692	Pentafunctional AROM protein	METABOLISM	E	Amino acid transport and metabolism
IFM89_024239	At1g20510	6.28e-284	KOG1176	Acyl-CoA synthetase	METABOLISM	I	Lipid transport and metabolism
IFM89_006425	At3g27700	7.55e-116	KOG2135	Proteins containing the RNA recognition motif	POORLY CHARACTERIZED	R	General function prediction only
IFM89_020842	At1g68020	0	KOG1050	Trehalose-6-phosphate synthase component TPS1 and related subunits	METABOLISM	G	Carbohydrate transport and metabolism
IFM89_007513	At3g59920	2.12e-13	KOG1439	RAB proteins geranylgeranyltransferase component A (RAB escort protein)	CELLULAR PROCESSES AND SIGNALING	O	Posttranslational modification, protein turnover, chaperones
IFM89_032689	At5g25560	1.43e-121	KOG1940	Zn-finger protein	POORLY CHARACTERIZED	R	General function prediction only
IFM89_038224	At1g55110	3.27e-114	KOG1721	FOG: Zn-finger	POORLY CHARACTERIZED	R	General function prediction only
IFM89_037843	At1g33240	1.01e-28	KOG4282	Transcription factor GT-2 and related proteins, contains trihelix DNA-binding/SANT domain	INFORMATION STORAGE AND PROCESSING	K	Transcription
IFM89_002181	At4g33080	3.11e-281	KOG0605	NDR and related serine/threonine kinases	POORLY CHARACTERIZED	R	General function prediction only
IFM89_035122	At1g60470	1.32e-193	KOG1950	Glycosyl transferase, family 8 - glycogenin	METABOLISM	G	Carbohydrate transport and metabolism
IFM89_006661	At4g35160	5.62e-69	KOG3178	Hydroxyindole-O-methyltransferase and related SAM-dependent methyltransferases	POORLY CHARACTERIZED	R	General function prediction only
IFM89_034484	At5g34930	2.07e-89	KOG2380	Prephenate dehydrogenase (NADP+)	METABOLISM	E	Amino acid transport and metabolism
IFM89_033096	At1g15520	0	KOG0065	Pleiotropic drug resistance proteins (PDR1-15), ABC superfamily	METABOLISM	Q	Secondary metabolites biosynthesis, transport and catabolism
IFM89_009445	At5g20060	3.1e-132	KOG2112	Lysophospholipase	METABOLISM	I	Lipid transport and metabolism
IFM89_015207	At2g37410	7.27e-71	KOG1652	Mitochondrial import inner membrane translocase, subunit TIM17	CELLULAR PROCESSES AND SIGNALING	U	Intracellular trafficking, secretion, and vesicular transport
IFM89_024357	At2g01320	0	KOG0061	Transporter, ABC superfamily (Breast cancer resistance protein)	METABOLISM	Q	Secondary metabolites biosynthesis, transport and catabolism
IFM89_013313	At5g62690	1.16e-160	KOG1375	Beta tubulin	CELLULAR PROCESSES AND SIGNALING	Z	Cytoskeleton
IFM89_008086	At1g26560	4.46e-292	KOG0626	Beta-glucosidase, lactase phlorizinhydrolase, and related proteins	METABOLISM	G	Carbohydrate transport and metabolism
IFM89_001583	At4g13830	5.94e-21	KOG0712	Molecular chaperone (DnaJ superfamily)	CELLULAR PROCESSES AND SIGNALING	O	Posttranslational modification, protein turnover, chaperones
IFM89_011302	At5g16940	3.35e-73	KOG4192	Uncharacterized conserved protein	POORLY CHARACTERIZED	S	Function unknown
IFM89_013275	At5g17330	0	KOG1383	Glutamate decarboxylase/sphingosine phosphate lyase	METABOLISM	E	Amino acid transport and metabolism
novel.2436	At1g05190	5.02e-22	KOG3254	Mitochondrial/chloroplast ribosomal protein L6	INFORMATION STORAGE AND PROCESSING	J	Translation, ribosomal structure and biogenesis
IFM89_009669	At1g54830	6.89e-80	KOG1657	CCAAT-binding factor, subunit C (HAP5)	INFORMATION STORAGE AND PROCESSING	K	Transcription
IFM89_006980	At4g34890	2.15e-88	KOG0430	Xanthine dehydrogenase	METABOLISM	F	Nucleotide transport and metabolism
IFM89_032428	At1g05460	9.48e-55	KOG1804	RNA helicase	INFORMATION STORAGE AND PROCESSING	A	RNA processing and modification
IFM89_027696	At3g26210	2.1e-142	KOG0156	Cytochrome P450 CYP2 subfamily	METABOLISM	Q	Secondary metabolites biosynthesis, transport and catabolism
IFM89_003386	At1g73880	5.98e-176	KOG1192	UDP-glucuronosyl and UDP-glucosyl transferase	METABOLISM	G	Carbohydrate transport and metabolism
IFM89_004945	At5g62740	9.15e-177	KOG2620	Prohibitins and stomatins of the PID superfamily	METABOLISM	C	Energy production and conversion
IFM89_021490	At1g80440	5.64e-62	KOG1072	FOG: Kelch repeat	POORLY CHARACTERIZED	R	General function prediction only
IFM89_001539	At2g38410	6.74e-162	KOG1087	Cytosolic sorting protein GGA2/TOM1	CELLULAR PROCESSES AND SIGNALING	U	Intracellular trafficking, secretion, and vesicular transport
IFM89_026374	At5g20880_1	2.27e-37	KOG0800	FOG: Predicted E3 ubiquitin ligase	CELLULAR PROCESSES AND SIGNALING	O	Posttranslational modification, protein turnover, chaperones
IFM89_037587	At5g04040	0	KOG2214	Predicted esterase of the alpha-beta hydrolase superfamily	POORLY CHARACTERIZED	R	General function prediction only
IFM89_032926	At5g10050	1.11e-112	KOG1209	1-Acyl dihydroxyacetone phosphate reductase and related dehydrogenases	METABOLISM	Q	Secondary metabolites biosynthesis, transport and catabolism
IFM89_037861	At5g47610	8.6e-35	KOG0800	FOG: Predicted E3 ubiquitin ligase	CELLULAR PROCESSES AND SIGNALING	O	Posttranslational modification, protein turnover, chaperones
IFM89_005217	At4g31940	5.58e-181	KOG0156	Cytochrome P450 CYP2 subfamily	METABOLISM	Q	Secondary metabolites biosynthesis, transport and catabolism
IFM89_018855	At1g67580	3.07e-257	KOG0663	Protein kinase PITSLRE and related kinases	POORLY CHARACTERIZED	R	General function prediction only
IFM89_032113	At4g31940	9.31e-158	KOG0156	Cytochrome P450 CYP2 subfamily	METABOLISM	Q	Secondary metabolites biosynthesis, transport and catabolism
IFM89_011801	At3g51800	8.72e-12	KOG2776	Metallopeptidase	POORLY CHARACTERIZED	R	General function prediction only
IFM89_002703	At5g45190	9.65e-60	KOG0834	CDK9 kinase-activating protein cyclin T	CELLULAR PROCESSES AND SIGNALING	D	Cell cycle control, cell division, chromosome partitioning
IFM89_008416	At3g45400	3.75e-218	KOG1021	Acetylglucosaminyltransferase EXT1/exostosin 1	METABOLISM	G	Carbohydrate transport and metabolism
IFM89_013502	At5g17920	0	KOG2263	Methionine synthase II (cobalamin-independent)	METABOLISM	E	Amino acid transport and metabolism
IFM89_035125	At4g22220	5.18e-55	KOG3361	Iron binding protein involved in Fe-S cluster formation	METABOLISM	C	Energy production and conversion
IFM89_035055	At3g62980	1.33e-214	KOG1947	Leucine rich repeat proteins, some proteins contain F-box	POORLY CHARACTERIZED	R	General function prediction only
novel.1088	At2g01550	1.66e-23	KOG1075	FOG: Reverse transcriptase	POORLY CHARACTERIZED	R	General function prediction only
IFM89_037705	At1g22550	8.17e-39	KOG1237	H+/oligopeptide symporter	METABOLISM	E	Amino acid transport and metabolism
IFM89_032856	At3g61040	1.59e-10	KOG0156	Cytochrome P450 CYP2 subfamily	METABOLISM	Q	Secondary metabolites biosynthesis, transport and catabolism
IFM89_033338	At5g59910	1.29e-62	KOG1744	Histone H2B	INFORMATION STORAGE AND PROCESSING	B	Chromatin structure and dynamics
novel.7061	At5g55100	3.06e-08	KOG1847	mRNA splicing factor	INFORMATION STORAGE AND PROCESSING	A	RNA processing and modification
IFM89_022594	At3g49680	3.09e-195	KOG0975	Branched chain aminotransferase BCAT1, pyridoxal phosphate enzymes type IV superfamily	METABOLISM	E	Amino acid transport and metabolism
IFM89_018667	At4g21150	1.19e-194	KOG2447	Oligosaccharyltransferase, delta subunit (ribophorin II)	CELLULAR PROCESSES AND SIGNALING	O	Posttranslational modification, protein turnover, chaperones
IFM89_016955	At5g18600	1.32e-41	KOG1752	Glutaredoxin and related proteins	CELLULAR PROCESSES AND SIGNALING	O	Posttranslational modification, protein turnover, chaperones
IFM89_007493	At5g60800	4.69e-41	KOG1603	Copper chaperone	METABOLISM	P	Inorganic ion transport and metabolism
IFM89_013505	At5g17920	0	KOG2263	Methionine synthase II (cobalamin-independent)	METABOLISM	E	Amino acid transport and metabolism
IFM89_012607	At4g31970	6.26e-153	KOG0156	Cytochrome P450 CYP2 subfamily	METABOLISM	Q	Secondary metabolites biosynthesis, transport and catabolism
novel.505	At1g20390	5.17e-58	KOG0017	FOG: Transposon-encoded proteins with TYA, reverse transcriptase, integrase domains in various combinations	POORLY CHARACTERIZED	R	General function prediction only
IFM89_003009	At3g18080	2.78e-284	KOG0626	Beta-glucosidase, lactase phlorizinhydrolase, and related proteins	METABOLISM	G	Carbohydrate transport and metabolism
IFM89_039506	At2g15430	8.25e-105	KOG1522	RNA polymerase II, subunit POLR2C/RPB3	INFORMATION STORAGE AND PROCESSING	K	Transcription
IFM89_005636	At5g46840	9.32e-84	KOG0118	FOG: RRM domain	POORLY CHARACTERIZED	R	General function prediction only
IFM89_001316	At5g56290	7.21e-269	KOG1125	TPR repeat-containing protein	POORLY CHARACTERIZED	R	General function prediction only
IFM89_033994	At2g21050	3.32e-308	KOG1303	Amino acid transporters	METABOLISM	E	Amino acid transport and metabolism
IFM89_015809	At1g50940	2.29e-170	KOG3954	Electron transfer flavoprotein, alpha subunit	METABOLISM	C	Energy production and conversion
IFM89_032090	At2g26510	1.3e-254	KOG1292	Xanthine/uracil transporters	METABOLISM	F	Nucleotide transport and metabolism
IFM89_017833	At1g47530	7.2e-180	KOG1347	Uncharacterized membrane protein, predicted efflux pump	POORLY CHARACTERIZED	R	General function prediction only
novel.8210	At2g40830	4.37e-93	KOG0800	FOG: Predicted E3 ubiquitin ligase	CELLULAR PROCESSES AND SIGNALING	O	Posttranslational modification, protein turnover, chaperones
IFM89_025976	At2g43460	6.86e-33	KOG3499	60S ribosomal protein L38	INFORMATION STORAGE AND PROCESSING	J	Translation, ribosomal structure and biogenesis
IFM89_011834	At2g36320	1.74e-50	KOG3173	Predicted Zn-finger protein	POORLY CHARACTERIZED	R	General function prediction only
IFM89_004531	At2g14580	8.5e-70	KOG3017	Defense-related protein containing SCP domain	POORLY CHARACTERIZED	S	Function unknown
IFM89_036323	At4g19010	1.33e-156	KOG1176	Acyl-CoA synthetase	METABOLISM	I	Lipid transport and metabolism
IFM89_023664	At4g13930	0	KOG2467	Glycine/serine hydroxymethyltransferase	METABOLISM	E	Amino acid transport and metabolism
IFM89_017821	At3g02450	5.87e-80	KOG0731	AAA+-type ATPase containing the peptidase M41 domain	CELLULAR PROCESSES AND SIGNALING	O	Posttranslational modification, protein turnover, chaperones
IFM89_007681	At3g20015	3.22e-218	KOG1339	Aspartyl protease	CELLULAR PROCESSES AND SIGNALING	O	Posttranslational modification, protein turnover, chaperones
IFM89_024126	At3g10520	1.6e-76	KOG3378	Globins and related hemoproteins	METABOLISM	C	Energy production and conversion
IFM89_008957	At2g30050	4.07e-93	KOG1332	Vesicle coat complex COPII, subunit SEC13	CELLULAR PROCESSES AND SIGNALING	U	Intracellular trafficking, secretion, and vesicular transport
IFM89_018471	At5g66080	3e-156	KOG0700	Protein phosphatase 2C/pyruvate dehydrogenase (lipoamide) phosphatase	CELLULAR PROCESSES AND SIGNALING	T	Signal transduction mechanisms
IFM89_038092	At2g46930	9.35e-189	KOG4287	Pectin acetylesterase and similar proteins	CELLULAR PROCESSES AND SIGNALING	M	Cell wall/membrane/envelope biogenesis
IFM89_028800	At2g30860	7.34e-99	KOG0867	Glutathione S-transferase	CELLULAR PROCESSES AND SIGNALING	O	Posttranslational modification, protein turnover, chaperones
IFM89_011353	At5g67570	9.72e-150	KOG4197	FOG: PPR repeat	POORLY CHARACTERIZED	R	General function prediction only
IFM89_002663	At1g55000	1.81e-92	KOG2850	Predicted peptidoglycan-binding protein, contains LysM domain	POORLY CHARACTERIZED	R	General function prediction only
IFM89_007922	At4g34280_1	3.04e-55	KOG0531	Protein phosphatase 1, regulatory subunit, and related proteins	CELLULAR PROCESSES AND SIGNALING	T	Signal transduction mechanisms
IFM89_004908	At1g75220	8.45e-16	KOG0254	Predicted transporter (major facilitator superfamily)	POORLY CHARACTERIZED	R	General function prediction only
IFM89_037181	At3g19130	1.96e-103	KOG0118	FOG: RRM domain	POORLY CHARACTERIZED	R	General function prediction only
IFM89_039102	At1g60420	7.53e-100	KOG2501	Thioredoxin, nucleoredoxin and related proteins	POORLY CHARACTERIZED	R	General function prediction only
IFM89_037985	At3g02330	4.82e-301	KOG4197	FOG: PPR repeat	POORLY CHARACTERIZED	R	General function prediction only
IFM89_015017	At5g53170	0	KOG0734	AAA+-type ATPase containing the peptidase M41 domain	CELLULAR PROCESSES AND SIGNALING	O	Posttranslational modification, protein turnover, chaperones
IFM89_002800	At4g35160	1.1e-57	KOG3178	Hydroxyindole-O-methyltransferase and related SAM-dependent methyltransferases	POORLY CHARACTERIZED	R	General function prediction only
IFM89_012552	At1g01090	7.11e-235	KOG0225	Pyruvate dehydrogenase E1, alpha subunit	METABOLISM	C	Energy production and conversion
IFM89_021790	At1g76160	0	KOG1263	Multicopper oxidases	METABOLISM	Q	Secondary metabolites biosynthesis, transport and catabolism
novel.8144	At1g76490	3.35e-176	KOG2480	3-hydroxy-3-methylglutaryl-CoA (HMG-CoA) reductase	METABOLISM	I	Lipid transport and metabolism
IFM89_037698	At1g63640	0	KOG0239	Kinesin (KAR3 subfamily)	CELLULAR PROCESSES AND SIGNALING	Z	Cytoskeleton
IFM89_017984	At3g23250	1.52e-75	KOG0048	Transcription factor, Myb superfamily	INFORMATION STORAGE AND PROCESSING	K	Transcription
IFM89_007623	At4g35160	4.57e-57	KOG3178	Hydroxyindole-O-methyltransferase and related SAM-dependent methyltransferases	POORLY CHARACTERIZED	R	General function prediction only
IFM89_002155	At1g72820	9.56e-178	KOG0765	Predicted mitochondrial carrier protein	METABOLISM	C	Energy production and conversion
IFM89_033908	At5g13170	5.1e-83	KOG1623	Multitransmembrane protein	POORLY CHARACTERIZED	R	General function prediction only
IFM89_002001	At5g67030	7.21e-300	KOG2614	Kynurenine 3-monooxygenase and related flavoprotein monooxygenases	METABOLISM	C	Energy production and conversion
IFM89_015237	At1g08200	3.74e-261	KOG1429	dTDP-glucose 4-6-dehydratase/UDP-glucuronic acid decarboxylase	METABOLISM	G	Carbohydrate transport and metabolism
IFM89_001289	At4g17080	3.68e-28	KOG0231	Junctional membrane complex protein Junctophilin and related MORN repeat proteins	POORLY CHARACTERIZED	R	General function prediction only
IFM89_017655	At1g30280	1.91e-19	KOG0431	Auxilin-like protein and related proteins containing DnaJ domain	POORLY CHARACTERIZED	R	General function prediction only
IFM89_037118	At5g22440	2.85e-95	KOG1570	60S ribosomal protein L10A	INFORMATION STORAGE AND PROCESSING	J	Translation, ribosomal structure and biogenesis
IFM89_019192	At4g13310	7.91e-124	KOG0156	Cytochrome P450 CYP2 subfamily	METABOLISM	Q	Secondary metabolites biosynthesis, transport and catabolism
IFM89_028155	At3g24840	1.61e-166	KOG1471	Phosphatidylinositol transfer protein SEC14 and related proteins	METABOLISM	I	Lipid transport and metabolism
IFM89_026409	At4g10770	0	KOG2262	Sexual differentiation process protein ISP4	CELLULAR PROCESSES AND SIGNALING	T	Signal transduction mechanisms
IFM89_012802	At3g27890	3.33e-104	KOG4530	Predicted flavoprotein	POORLY CHARACTERIZED	R	General function prediction only
novel.6141	At5g20090	6.38e-23	KOG1590	Uncharacterized conserved protein	POORLY CHARACTERIZED	S	Function unknown
IFM89_004670	At5g42260	1.67e-128	KOG0626	Beta-glucosidase, lactase phlorizinhydrolase, and related proteins	METABOLISM	G	Carbohydrate transport and metabolism
IFM89_023154	At1g06410	0	KOG1050	Trehalose-6-phosphate synthase component TPS1 and related subunits	METABOLISM	G	Carbohydrate transport and metabolism
IFM89_002891	At1g05460	1.95e-54	KOG1804	RNA helicase	INFORMATION STORAGE AND PROCESSING	A	RNA processing and modification
IFM89_002813	At4g31940	3.46e-156	KOG0156	Cytochrome P450 CYP2 subfamily	METABOLISM	Q	Secondary metabolites biosynthesis, transport and catabolism
IFM89_018021	At1g76680	6.17e-218	KOG0134	NADH:flavin oxidoreductase/12-oxophytodienoate reductase	METABOLISM	C	Energy production and conversion
IFM89_027023	At3g26230	2.61e-68	KOG0156	Cytochrome P450 CYP2 subfamily	METABOLISM	Q	Secondary metabolites biosynthesis, transport and catabolism
IFM89_005627	At3g16857	8.19e-110	KOG1601	GATA-4/5/6 transcription factors	INFORMATION STORAGE AND PROCESSING	K	Transcription
IFM89_021552	At5g57660	4.9e-31	KOG1601	GATA-4/5/6 transcription factors	INFORMATION STORAGE AND PROCESSING	K	Transcription
IFM89_037153	At2g17220	8.96e-128	KOG1187	Serine/threonine protein kinase	CELLULAR PROCESSES AND SIGNALING	T	Signal transduction mechanisms
IFM89_008212	At5g17230	1.59e-50	KOG1459	Squalene synthetase	METABOLISM	I	Lipid transport and metabolism
IFM89_023300	At3g21690	4.4e-231	KOG1347	Uncharacterized membrane protein, predicted efflux pump	POORLY CHARACTERIZED	R	General function prediction only
IFM89_003476	At3g08760	4.78e-206	KOG1187	Serine/threonine protein kinase	CELLULAR PROCESSES AND SIGNALING	T	Signal transduction mechanisms
IFM89_021705	At5g17300	7.91e-55	KOG0724	Zuotin and related molecular chaperones (DnaJ superfamily), contains DNA-binding domains	CELLULAR PROCESSES AND SIGNALING	O	Posttranslational modification, protein turnover, chaperones
IFM89_024002	At5g45890	2.21e-128	KOG1543	Cysteine proteinase Cathepsin L	CELLULAR PROCESSES AND SIGNALING	O	Posttranslational modification, protein turnover, chaperones
IFM89_018143	At3g62760	6.36e-91	KOG0867	Glutathione S-transferase	CELLULAR PROCESSES AND SIGNALING	O	Posttranslational modification, protein turnover, chaperones
IFM89_039610	At5g49820	2.57e-156	KOG4249	Uncharacterized conserved protein	POORLY CHARACTERIZED	S	Function unknown
IFM89_006860	At4g38950	1.7e-250	KOG0242	Kinesin-like protein	CELLULAR PROCESSES AND SIGNALING	Z	Cytoskeleton
IFM89_034940	At1g06110	1.11e-145	KOG4408	Putative Mg2+ and Co2+ transporter CorD	METABOLISM	P	Inorganic ion transport and metabolism
IFM89_032183	At1g24030	5.59e-171	KOG1187	Serine/threonine protein kinase	CELLULAR PROCESSES AND SIGNALING	T	Signal transduction mechanisms
IFM89_018163	At2g21650	1.88e-37	KOG0724	Zuotin and related molecular chaperones (DnaJ superfamily), contains DNA-binding domains	CELLULAR PROCESSES AND SIGNALING	O	Posttranslational modification, protein turnover, chaperones
IFM89_038001	At2g45510	4.21e-156	KOG0157	Cytochrome P450 CYP4/CYP19/CYP26 subfamilies	METABOLISM	Q	Secondary metabolites biosynthesis, transport and catabolism
IFM89_028659	At1g78570	0	KOG0747	Putative NAD+-dependent epimerases	METABOLISM	G	Carbohydrate transport and metabolism
novel.8586	At5g10170	3.56e-96	KOG0693	Myo-inositol-1-phosphate synthase	METABOLISM	I	Lipid transport and metabolism
IFM89_020932	At1g56700	2.05e-72	KOG4755	Predicted pyroglutamyl peptidase	CELLULAR PROCESSES AND SIGNALING	O	Posttranslational modification, protein turnover, chaperones
novel.8968	At2g42590	2.35e-06	KOG0841	Multifunctional chaperone (14-3-3 family)	CELLULAR PROCESSES AND SIGNALING	O	Posttranslational modification, protein turnover, chaperones
IFM89_012604	At1g17020	2.18e-105	KOG0143	Iron/ascorbate family oxidoreductases	METABOLISM	Q	Secondary metabolites biosynthesis, transport and catabolism
IFM89_001020	At4g35160	3.5e-65	KOG3178	Hydroxyindole-O-methyltransferase and related SAM-dependent methyltransferases	POORLY CHARACTERIZED	R	General function prediction only
IFM89_025180	At1g72160	8.38e-110	KOG1471	Phosphatidylinositol transfer protein SEC14 and related proteins	METABOLISM	I	Lipid transport and metabolism
IFM89_021643	At3g13690	0	KOG1187	Serine/threonine protein kinase	CELLULAR PROCESSES AND SIGNALING	T	Signal transduction mechanisms
IFM89_005318	At2g40810	8.99e-169	KOG2111	Uncharacterized conserved protein, contains WD40 repeats	POORLY CHARACTERIZED	S	Function unknown
IFM89_017151	At1g70210	1.76e-100	KOG0656	G1/S-specific cyclin D	CELLULAR PROCESSES AND SIGNALING	D	Cell cycle control, cell division, chromosome partitioning
IFM89_025586	At2g37040	2.95e-259	KOG0222	Phenylalanine and histidine ammonia-lyase	METABOLISM	Q	Secondary metabolites biosynthesis, transport and catabolism
IFM89_037989	At1g74740	1.2e-33	KOG0032	Ca2+/calmodulin-dependent protein kinase, EF-Hand protein superfamily	CELLULAR PROCESSES AND SIGNALING	T	Signal transduction mechanisms
novel.6947	At5g49890	1.35e-10	KOG0474	Cl- channel CLC-7 and related proteins (CLC superfamily)	METABOLISM	P	Inorganic ion transport and metabolism
IFM89_007702	At1g62310	3.87e-69	KOG1356	Putative transcription factor 5qNCA, contains JmjC domain	INFORMATION STORAGE AND PROCESSING	K	Transcription
IFM89_015456	At4g00360	1.25e-304	KOG0157	Cytochrome P450 CYP4/CYP19/CYP26 subfamilies	METABOLISM	Q	Secondary metabolites biosynthesis, transport and catabolism
IFM89_026039	At5g12180	0	KOG0032	Ca2+/calmodulin-dependent protein kinase, EF-Hand protein superfamily	CELLULAR PROCESSES AND SIGNALING	T	Signal transduction mechanisms
IFM89_003849	At2g03150	2.88e-156	KOG4246	Predicted DNA-binding protein, contains SAP domain	POORLY CHARACTERIZED	R	General function prediction only
IFM89_033152	At5g56550	4.76e-16	KOG4210	Nuclear localization sequence binding protein	INFORMATION STORAGE AND PROCESSING	K	Transcription
IFM89_038132	At1g61010	1.28e-202	KOG1137	mRNA cleavage and polyadenylation factor II complex, BRR5 (CPSF subunit)	INFORMATION STORAGE AND PROCESSING	A	RNA processing and modification
IFM89_017062	At5g35200	5.57e-226	KOG0251	Clathrin assembly protein AP180 and related proteins, contain ENTH domain	CELLULAR PROCESSES AND SIGNALING	T	Signal transduction mechanisms
IFM89_035290	At5g57870	2.32e-300	KOG0401	Translation initiation factor 4F, ribosome/mRNA-bridging subunit (eIF-4G)	INFORMATION STORAGE AND PROCESSING	J	Translation, ribosomal structure and biogenesis
IFM89_028313	At2g46580	1.56e-07	KOG4558	Uncharacterized conserved protein	POORLY CHARACTERIZED	S	Function unknown
IFM89_007725	At5g16340	5.56e-224	KOG1176	Acyl-CoA synthetase	METABOLISM	I	Lipid transport and metabolism
IFM89_019072	At5g24270	3.16e-40	KOG0034	Ca2+/calmodulin-dependent protein phosphatase (calcineurin subunit B), EF-Hand superfamily protein	CELLULAR PROCESSES AND SIGNALING	T	Signal transduction mechanisms
IFM89_016291	At3g17390	1.07e-279	KOG1506	S-adenosylmethionine synthetase	METABOLISM	H	Coenzyme transport and metabolism
IFM89_025593	At5g03300	1.21e-214	KOG2854	Possible pfkB family carbohydrate kinase	METABOLISM	G	Carbohydrate transport and metabolism
IFM89_001612	At1g77120	9.86e-240	KOG0022	Alcohol dehydrogenase, class III	METABOLISM	Q	Secondary metabolites biosynthesis, transport and catabolism
IFM89_032139	At2g18900	7.54e-75	KOG1963	WD40 repeat protein	POORLY CHARACTERIZED	R	General function prediction only
IFM89_029944	At1g08250	5.32e-214	KOG2797	Prephenate dehydratase	METABOLISM	E	Amino acid transport and metabolism
IFM89_009885	At3g08620	4.96e-96	KOG1588	RNA-binding protein Sam68 and related KH domain proteins	INFORMATION STORAGE AND PROCESSING	A	RNA processing and modification
IFM89_033205	At3g60180	5.08e-90	KOG3079	Uridylate kinase/adenylate kinase	METABOLISM	F	Nucleotide transport and metabolism
IFM89_001759	At5g05810	4.87e-100	KOG0800	FOG: Predicted E3 ubiquitin ligase	CELLULAR PROCESSES AND SIGNALING	O	Posttranslational modification, protein turnover, chaperones
IFM89_035312	At1g80920	2.12e-33	KOG0715	Molecular chaperone (DnaJ superfamily)	CELLULAR PROCESSES AND SIGNALING	O	Posttranslational modification, protein turnover, chaperones
IFM89_021944	7291363	8.06e-47	KOG0542	Predicted exonuclease	INFORMATION STORAGE AND PROCESSING	L	Replication, recombination and repair
IFM89_031850	At3g58630	3e-60	KOG4282	Transcription factor GT-2 and related proteins, contains trihelix DNA-binding/SANT domain	INFORMATION STORAGE AND PROCESSING	K	Transcription
IFM89_004892	At4g22130	2.23e-190	KOG1187	Serine/threonine protein kinase	CELLULAR PROCESSES AND SIGNALING	T	Signal transduction mechanisms
novel.8308	At5g23530	1.86e-72	KOG1515	Arylacetamide deacetylase	CELLULAR PROCESSES AND SIGNALING	V	Defense mechanisms
IFM89_019048	At5g39990	4.2e-225	KOG0799	Branching enzyme	METABOLISM	G	Carbohydrate transport and metabolism
IFM89_002379	At2g45510	3.01e-120	KOG0157	Cytochrome P450 CYP4/CYP19/CYP26 subfamilies	METABOLISM	Q	Secondary metabolites biosynthesis, transport and catabolism
IFM89_005637	At5g46840	1.7e-17	KOG0118	FOG: RRM domain	POORLY CHARACTERIZED	R	General function prediction only
IFM89_036209	At4g27460	9.17e-109	KOG1764	5'-AMP-activated protein kinase, gamma subunit	METABOLISM	C	Energy production and conversion
IFM89_035333	At1g52870	7.26e-148	KOG1944	Peroxisomal membrane protein MPV17 and related proteins	POORLY CHARACTERIZED	R	General function prediction only
IFM89_004060	At3g18370	1.53e-278	KOG1012	Ca2+-dependent lipid-binding protein CLB1/vesicle protein vp115/Granuphilin A, contains C2 domain	POORLY CHARACTERIZED	R	General function prediction only
IFM89_034253	At4g27670	1.22e-74	KOG0710	Molecular chaperone (small heat-shock protein Hsp26/Hsp42)	CELLULAR PROCESSES AND SIGNALING	O	Posttranslational modification, protein turnover, chaperones
IFM89_024427	At5g53460	0	KOG0399	Glutamate synthase	METABOLISM	E	Amino acid transport and metabolism
IFM89_003393	At5g17310	4.37e-217	KOG2638	UDP-glucose pyrophosphorylase	METABOLISM	G	Carbohydrate transport and metabolism
IFM89_017316	At5g13740	3.88e-100	KOG2615	Permease of the major facilitator superfamily	POORLY CHARACTERIZED	R	General function prediction only
IFM89_012820	At5g12180	0	KOG0032	Ca2+/calmodulin-dependent protein kinase, EF-Hand protein superfamily	CELLULAR PROCESSES AND SIGNALING	T	Signal transduction mechanisms
IFM89_000357	At5g06390	7.83e-212	KOG1437	Fasciclin and related adhesion glycoproteins	CELLULAR PROCESSES AND SIGNALING	M	Cell wall/membrane/envelope biogenesis
IFM89_005782	At2g16400	7.46e-121	KOG0773	Transcription factor MEIS1 and related HOX domain proteins	INFORMATION STORAGE AND PROCESSING	K	Transcription
IFM89_004837	At5g16180	1.13e-83	KOG1990	Poly(A)-specific exoribonuclease PARN	INFORMATION STORAGE AND PROCESSING	L	Replication, recombination and repair
IFM89_019587	At4g33010	0	KOG2040	Glycine dehydrogenase (decarboxylating)	METABOLISM	E	Amino acid transport and metabolism
IFM89_039117	At5g16120	4.85e-27	KOG1455	Lysophospholipase	METABOLISM	I	Lipid transport and metabolism
IFM89_033387	At2g36690	5.93e-153	KOG0143	Iron/ascorbate family oxidoreductases	METABOLISM	Q	Secondary metabolites biosynthesis, transport and catabolism
IFM89_035475	At1g73660	0	KOG0192	Tyrosine kinase specific for activated (GTP-bound) p21cdc42Hs	CELLULAR PROCESSES AND SIGNALING	T	Signal transduction mechanisms
IFM89_028666	At3g14770	1.02e-81	KOG1623	Multitransmembrane protein	POORLY CHARACTERIZED	R	General function prediction only
IFM89_011075	At4g34450	0	KOG1078	Vesicle coat complex COPI, gamma subunit	CELLULAR PROCESSES AND SIGNALING	U	Intracellular trafficking, secretion, and vesicular transport
IFM89_036662	At5g64410	0	KOG2262	Sexual differentiation process protein ISP4	CELLULAR PROCESSES AND SIGNALING	T	Signal transduction mechanisms
IFM89_002338	At2g38860	1.61e-150	KOG2764	Putative transcriptional regulator DJ-1	POORLY CHARACTERIZED	R	General function prediction only
IFM89_030221	At1g63220	3.46e-66	KOG1030	Predicted Ca2+-dependent phospholipid-binding protein	POORLY CHARACTERIZED	R	General function prediction only
IFM89_003041	At3g43810	3.11e-71	KOG0027	Calmodulin and related proteins (EF-Hand superfamily)	CELLULAR PROCESSES AND SIGNALING	T	Signal transduction mechanisms
IFM89_006579	At3g03170	2.38e-06	KOG4210	Nuclear localization sequence binding protein	INFORMATION STORAGE AND PROCESSING	K	Transcription
IFM89_019471	At2g42810	1.89e-259	KOG0376	Serine-threonine phosphatase 2A, catalytic subunit	POORLY CHARACTERIZED	R	General function prediction only
IFM89_029645	At3g61790	1.32e-196	KOG3002	Zn finger protein	POORLY CHARACTERIZED	R	General function prediction only
IFM89_029134	At3g19420	1.88e-168	KOG2283	Clathrin coat dissociation kinase GAK/PTEN/Auxilin and related tyrosine phosphatases	CELLULAR PROCESSES AND SIGNALING	T	Signal transduction mechanisms
IFM89_035969	At5g13580	0	KOG0061	Transporter, ABC superfamily (Breast cancer resistance protein)	METABOLISM	Q	Secondary metabolites biosynthesis, transport and catabolism
IFM89_004265	At1g79930	0	KOG0103	Molecular chaperones HSP105/HSP110/SSE1, HSP70 superfamily	CELLULAR PROCESSES AND SIGNALING	O	Posttranslational modification, protein turnover, chaperones
IFM89_005983	At3g13300	0	KOG1916	Nuclear protein, contains WD40 repeats	POORLY CHARACTERIZED	R	General function prediction only
IFM89_004157	At3g54140	9.96e-290	KOG1237	H+/oligopeptide symporter	METABOLISM	E	Amino acid transport and metabolism
IFM89_034893	At3g25230	1.79e-69	KOG0543	FKBP-type peptidyl-prolyl cis-trans isomerase	CELLULAR PROCESSES AND SIGNALING	O	Posttranslational modification, protein turnover, chaperones
IFM89_030978	At4g17260	7.18e-189	KOG1495	Lactate dehydrogenase	METABOLISM	C	Energy production and conversion
IFM89_002696	At1g09010	0	KOG2230	Predicted beta-mannosidase	METABOLISM	G	Carbohydrate transport and metabolism
IFM89_018363	At3g58130	2.03e-43	KOG3332	N-acetylglucosaminyl phosphatidylinositol de-N-acetylase	CELLULAR PROCESSES AND SIGNALING	M	Cell wall/membrane/envelope biogenesis
IFM89_032679	At4g05500	4.51e-52	KOG1947	Leucine rich repeat proteins, some proteins contain F-box	POORLY CHARACTERIZED	R	General function prediction only
IFM89_008799	At5g11500	7.87e-129	KOG3272	Predicted coiled-coil protein	POORLY CHARACTERIZED	R	General function prediction only
IFM89_034534	At3g60340	2.47e-126	KOG2541	Palmitoyl protein thioesterase	METABOLISM	I	Lipid transport and metabolism
IFM89_007780	At5g56550	5.04e-16	KOG4210	Nuclear localization sequence binding protein	INFORMATION STORAGE AND PROCESSING	K	Transcription
IFM89_012748	At4g01470	2.13e-140	KOG0223	Aquaporin (major intrinsic protein family)	METABOLISM	G	Carbohydrate transport and metabolism
IFM89_004241	At2g26910	0	KOG0065	Pleiotropic drug resistance proteins (PDR1-15), ABC superfamily	METABOLISM	Q	Secondary metabolites biosynthesis, transport and catabolism
IFM89_005947	At2g23890	7.96e-159	KOG2470	Similar to IMP-GMP specific 5'-nucleotidase	METABOLISM	F	Nucleotide transport and metabolism
IFM89_012021	At1g23800	6.14e-200	KOG2450	Aldehyde dehydrogenase	METABOLISM	C	Energy production and conversion
IFM89_029510	At2g20420	2.95e-255	KOG2799	Succinyl-CoA synthetase, beta subunit	METABOLISM	C	Energy production and conversion
IFM89_035666	At2g34750	5.6e-98	KOG2434	RNA polymerase I transcription factor	INFORMATION STORAGE AND PROCESSING	K	Transcription
IFM89_026366	At1g05850	3.73e-167	KOG4742	Predicted chitinase	POORLY CHARACTERIZED	R	General function prediction only
novel.8111	At4g37790	1.62e-58	KOG0483	Transcription factor HEX, contains HOX and HALZ domains	INFORMATION STORAGE AND PROCESSING	K	Transcription
IFM89_030656	At5g14520	9.56e-271	KOG2481	Protein required for normal rRNA processing	INFORMATION STORAGE AND PROCESSING	A	RNA processing and modification
IFM89_030236	At1g23870	0	KOG1050	Trehalose-6-phosphate synthase component TPS1 and related subunits	METABOLISM	G	Carbohydrate transport and metabolism
IFM89_022614	At1g14180	2.23e-154	KOG1238	Glucose dehydrogenase/choline dehydrogenase/mandelonitrile lyase (GMC oxidoreductase family)	POORLY CHARACTERIZED	R	General function prediction only
novel.8410	At4g02720	8.94e-75	KOG2812	Uncharacterized conserved protein	POORLY CHARACTERIZED	S	Function unknown
IFM89_007703	At1g11950	1.53e-135	KOG1356	Putative transcription factor 5qNCA, contains JmjC domain	INFORMATION STORAGE AND PROCESSING	K	Transcription
IFM89_026598	At2g28000	6.58e-289	KOG0356	Mitochondrial chaperonin, Cpn60/Hsp60p	CELLULAR PROCESSES AND SIGNALING	O	Posttranslational modification, protein turnover, chaperones
IFM89_000142	At3g12340	1.34e-48	KOG0552	FKBP-type peptidyl-prolyl cis-trans isomerase	CELLULAR PROCESSES AND SIGNALING	O	Posttranslational modification, protein turnover, chaperones
IFM89_028777	At5g11720	0	KOG1065	Maltase glucoamylase and related hydrolases, glycosyl hydrolase family 31	METABOLISM	G	Carbohydrate transport and metabolism
IFM89_029506	At3g23430	0	KOG1162	Predicted small molecule transporter	CELLULAR PROCESSES AND SIGNALING	U	Intracellular trafficking, secretion, and vesicular transport
IFM89_018592	At5g42620	9.04e-269	KOG2556	Leishmanolysin-like peptidase (Peptidase M8 family)	CELLULAR PROCESSES AND SIGNALING	M	Cell wall/membrane/envelope biogenesis
novel.8287	At1g77120	1.99e-45	KOG0022	Alcohol dehydrogenase, class III	METABOLISM	Q	Secondary metabolites biosynthesis, transport and catabolism
IFM89_011833	At3g13460	9.03e-196	KOG1901	Uncharacterized high-glucose-regulated protein	POORLY CHARACTERIZED	R	General function prediction only
IFM89_037098	At5g54160	7.14e-122	KOG3178	Hydroxyindole-O-methyltransferase and related SAM-dependent methyltransferases	POORLY CHARACTERIZED	R	General function prediction only
IFM89_023121	At4g35160	1.11e-80	KOG3178	Hydroxyindole-O-methyltransferase and related SAM-dependent methyltransferases	POORLY CHARACTERIZED	R	General function prediction only
IFM89_034301	At4g08900	3.08e-215	KOG2964	Arginase family protein	METABOLISM	E	Amino acid transport and metabolism
IFM89_025032	At4g34030	3.38e-260	KOG0540	3-Methylcrotonyl-CoA carboxylase, non-biotin containing subunit/Acetyl-CoA carboxylase carboxyl transferase, subunit beta	METABOLISM	E	Amino acid transport and metabolism
IFM89_018113	At4g30850	1.16e-119	KOG0748	Predicted membrane proteins, contain hemolysin III domain	POORLY CHARACTERIZED	R	General function prediction only
IFM89_024986	At5g49470	5.21e-102	KOG0192	Tyrosine kinase specific for activated (GTP-bound) p21cdc42Hs	CELLULAR PROCESSES AND SIGNALING	T	Signal transduction mechanisms
IFM89_017489	At1g24440	1.22e-59	KOG1039	Predicted E3 ubiquitin ligase	CELLULAR PROCESSES AND SIGNALING	O	Posttranslational modification, protein turnover, chaperones
IFM89_006153	At5g47540	1.01e-20	KOG1566	Conserved protein Mo25	POORLY CHARACTERIZED	S	Function unknown
IFM89_025225	At3g60240_2	2.44e-49	KOG0402	60S ribosomal protein L37	INFORMATION STORAGE AND PROCESSING	J	Translation, ribosomal structure and biogenesis
IFM89_007707	At2g43900	0	KOG0565	Inositol polyphosphate 5-phosphatase and related proteins	CELLULAR PROCESSES AND SIGNALING	U	Intracellular trafficking, secretion, and vesicular transport
novel.5879	At3g30420	6.12e-104	KOG0987	DNA helicase PIF1/RRM3	CELLULAR PROCESSES AND SIGNALING	D	Cell cycle control, cell division, chromosome partitioning
IFM89_033851	At3g06480	1.04e-23	KOG0331	ATP-dependent RNA helicase	INFORMATION STORAGE AND PROCESSING	A	RNA processing and modification
IFM89_000781	At1g59950	6.5e-127	KOG1577	Aldo/keto reductase family proteins	POORLY CHARACTERIZED	R	General function prediction only
IFM89_002009	At5g01410	5.75e-94	KOG1606	Stationary phase-induced protein, SOR/SNZ family	METABOLISM	H	Coenzyme transport and metabolism
IFM89_023735	At4g24740	9.62e-58	KOG0671	LAMMER dual specificity kinases	CELLULAR PROCESSES AND SIGNALING	T	Signal transduction mechanisms
IFM89_031188	At3g26890	3.66e-103	KOG2306	Uncharacterized conserved protein	POORLY CHARACTERIZED	S	Function unknown
IFM89_033572	At5g57850	3.29e-125	KOG0975	Branched chain aminotransferase BCAT1, pyridoxal phosphate enzymes type IV superfamily	METABOLISM	E	Amino acid transport and metabolism
novel.7006	At1g78800	3.07e-15	KOG0853	Glycosyltransferase	CELLULAR PROCESSES AND SIGNALING	M	Cell wall/membrane/envelope biogenesis
IFM89_028665	At1g78560	1.13e-138	KOG2718	Na+-bile acid cotransporter	METABOLISM	P	Inorganic ion transport and metabolism
IFM89_035229	At1g52380	5.69e-99	KOG0864	Ran-binding protein RANBP1 and related RanBD domain proteins	CELLULAR PROCESSES AND SIGNALING	U	Intracellular trafficking, secretion, and vesicular transport
IFM89_018410	At1g43690	2.87e-248	KOG2871	Uncharacterized conserved protein	POORLY CHARACTERIZED	S	Function unknown
IFM89_034163	At5g66310	7.13e-214	KOG0242	Kinesin-like protein	CELLULAR PROCESSES AND SIGNALING	Z	Cytoskeleton
novel.8621	At5g64200	2.92e-38	KOG4207	Predicted splicing factor, SR protein superfamily	INFORMATION STORAGE AND PROCESSING	A	RNA processing and modification
IFM89_025054	At2g44800	6.71e-73	KOG0143	Iron/ascorbate family oxidoreductases	METABOLISM	Q	Secondary metabolites biosynthesis, transport and catabolism
IFM89_035986	At5g50920	0	KOG1051	Chaperone HSP104 and related ATP-dependent Clp proteases	CELLULAR PROCESSES AND SIGNALING	O	Posttranslational modification, protein turnover, chaperones
IFM89_035515	At2g38090	6.11e-87	KOG0724	Zuotin and related molecular chaperones (DnaJ superfamily), contains DNA-binding domains	CELLULAR PROCESSES AND SIGNALING	O	Posttranslational modification, protein turnover, chaperones
IFM89_018202	At1g21570	1.96e-113	KOG1492	C3H1-type Zn-finger protein	POORLY CHARACTERIZED	R	General function prediction only
IFM89_037480	At5g14170	4.37e-243	KOG2570	SWI/SNF transcription activation complex subunit	INFORMATION STORAGE AND PROCESSING	B	Chromatin structure and dynamics
IFM89_028156	At2g32800	9.34e-212	KOG1187	Serine/threonine protein kinase	CELLULAR PROCESSES AND SIGNALING	T	Signal transduction mechanisms
IFM89_017070	At2g43820	7.77e-104	KOG1192	UDP-glucuronosyl and UDP-glucosyl transferase	METABOLISM	G	Carbohydrate transport and metabolism
IFM89_011582	At3g49600_2	0	KOG1863	Ubiquitin carboxyl-terminal hydrolase	CELLULAR PROCESSES AND SIGNALING	O	Posttranslational modification, protein turnover, chaperones
IFM89_012447	At1g07660	2.32e-67	KOG3467	Histone H4	INFORMATION STORAGE AND PROCESSING	B	Chromatin structure and dynamics
IFM89_011015	At3g18860	7.67e-78	KOG0301	Phospholipase A2-activating protein (contains WD40 repeats)	METABOLISM	I	Lipid transport and metabolism
IFM89_004788	At1g52820	7.34e-156	KOG0143	Iron/ascorbate family oxidoreductases	METABOLISM	Q	Secondary metabolites biosynthesis, transport and catabolism
IFM89_009825	At1g37130_1	1.66e-264	KOG0535	Sulfite oxidase, molybdopterin-binding component	METABOLISM	C	Energy production and conversion
novel.5164	At5g18480_2	9.45e-08	KOG4197	FOG: PPR repeat	POORLY CHARACTERIZED	R	General function prediction only
IFM89_020205	At5g49650	0	KOG2531	Sugar (pentulose and hexulose) kinases	METABOLISM	G	Carbohydrate transport and metabolism
IFM89_033850	At3g45040	7.1e-194	KOG2468	Dolichol kinase	METABOLISM	I	Lipid transport and metabolism
IFM89_036794	At2g40430	1.17e-90	KOG2823	Cellular protein (glioma tumor suppressor candidate region gene 2)	POORLY CHARACTERIZED	R	General function prediction only
IFM89_011562	At4g35090	0	KOG0047	Catalase	METABOLISM	P	Inorganic ion transport and metabolism
IFM89_009651	At3g56310	2.4e-221	KOG2366	Alpha-D-galactosidase (melibiase)	METABOLISM	G	Carbohydrate transport and metabolism
IFM89_002660	At2g32150	1.23e-97	KOG3109	Haloacid dehalogenase-like hydrolase	POORLY CHARACTERIZED	R	General function prediction only
IFM89_039080	At5g09300	1.14e-227	KOG1182	Branched chain alpha-keto acid dehydrogenase complex, alpha subunit	METABOLISM	C	Energy production and conversion
IFM89_002765	At2g33530	6.49e-114	KOG1282	Serine carboxypeptidases (lysosomal cathepsin A)	CELLULAR PROCESSES AND SIGNALING	O	Posttranslational modification, protein turnover, chaperones
IFM89_019959	At2g37730	5.7e-198	KOG2246	Galactosyltransferases	METABOLISM	G	Carbohydrate transport and metabolism
IFM89_012872	At5g58520	1.65e-276	KOG0192	Tyrosine kinase specific for activated (GTP-bound) p21cdc42Hs	CELLULAR PROCESSES AND SIGNALING	T	Signal transduction mechanisms
novel.4732	At2g20710	5.63e-07	KOG4197	FOG: PPR repeat	POORLY CHARACTERIZED	R	General function prediction only
IFM89_033176	At2g28910	3.75e-64	KOG2985	Uncharacterized conserved protein	POORLY CHARACTERIZED	S	Function unknown
IFM89_038891	At3g24050	5.13e-43	KOG1601	GATA-4/5/6 transcription factors	INFORMATION STORAGE AND PROCESSING	K	Transcription
IFM89_034550	At5g62670	0	KOG0205	Plasma membrane H+-transporting ATPase	METABOLISM	P	Inorganic ion transport and metabolism
IFM89_008774	At4g05020	3e-294	KOG2495	NADH-dehydrogenase (ubiquinone)	METABOLISM	C	Energy production and conversion
IFM89_034856	At5g48570	8.57e-34	KOG0543	FKBP-type peptidyl-prolyl cis-trans isomerase	CELLULAR PROCESSES AND SIGNALING	O	Posttranslational modification, protein turnover, chaperones
IFM89_010509	At1g52820	1.48e-128	KOG0143	Iron/ascorbate family oxidoreductases	METABOLISM	Q	Secondary metabolites biosynthesis, transport and catabolism
IFM89_007697	At3g19950	9.1e-88	KOG0800	FOG: Predicted E3 ubiquitin ligase	CELLULAR PROCESSES AND SIGNALING	O	Posttranslational modification, protein turnover, chaperones
IFM89_013281	At1g59950	8.55e-95	KOG1577	Aldo/keto reductase family proteins	POORLY CHARACTERIZED	R	General function prediction only
IFM89_030901	At5g44280	8.04e-24	KOG0311	Predicted E3 ubiquitin ligase	CELLULAR PROCESSES AND SIGNALING	O	Posttranslational modification, protein turnover, chaperones
IFM89_010977	At3g18850	1.01e-167	KOG1505	Lysophosphatidic acid acyltransferase LPAAT and related acyltransferases	METABOLISM	I	Lipid transport and metabolism
IFM89_012099	At5g28640	5.7e-35	KOG3227	Calcium-responsive transcription coactivator	INFORMATION STORAGE AND PROCESSING	K	Transcription
IFM89_018561	At1g04780	1.21e-08	KOG0522	Ankyrin repeat protein	POORLY CHARACTERIZED	R	General function prediction only
IFM89_004283	At4g30310	0	KOG2517	Ribulose kinase and related carbohydrate kinases	METABOLISM	G	Carbohydrate transport and metabolism
IFM89_029829	At2g46210	1.17e-230	KOG4232	Delta 6-fatty acid desaturase/delta-8 sphingolipid desaturase	METABOLISM	I	Lipid transport and metabolism
IFM89_027405	At2g01170	7.54e-241	KOG1289	Amino acid transporters	METABOLISM	E	Amino acid transport and metabolism
IFM89_021347	At4g01040	1.73e-189	KOG2091	Predicted member of glycosyl hydrolase family 18	METABOLISM	G	Carbohydrate transport and metabolism
IFM89_033550	At5g01820	3.78e-177	KOG0583	Serine/threonine protein kinase	CELLULAR PROCESSES AND SIGNALING	T	Signal transduction mechanisms
IFM89_028147	At1g04880_1	3.09e-65	KOG2744	DNA-binding proteins Bright/BRCAA1/RBP1 and related proteins containing BRIGHT domain	INFORMATION STORAGE AND PROCESSING	K	Transcription
IFM89_034405	At3g29200	5.69e-134	KOG0795	Chorismate mutase	METABOLISM	E	Amino acid transport and metabolism
IFM89_037048	At3g06480	2.44e-218	KOG0331	ATP-dependent RNA helicase	INFORMATION STORAGE AND PROCESSING	A	RNA processing and modification
IFM89_014139	At3g02280	2.69e-151	KOG1159	NADP-dependent flavoprotein reductase	METABOLISM	C	Energy production and conversion
IFM89_006647	At3g48990	3.79e-269	KOG1176	Acyl-CoA synthetase	METABOLISM	I	Lipid transport and metabolism
IFM89_036195	At4g34050	5.44e-161	KOG1663	O-methyltransferase	METABOLISM	Q	Secondary metabolites biosynthesis, transport and catabolism
novel.8480	At2g31630	1.65e-26	KOG1080	Histone H3 (Lys4) methyltransferase complex, subunit SET1 and related methyltransferases	INFORMATION STORAGE AND PROCESSING	B	Chromatin structure and dynamics
IFM89_038214	At2g26170	8.98e-258	KOG0158	Cytochrome P450 CYP3/CYP5/CYP6/CYP9 subfamilies	METABOLISM	Q	Secondary metabolites biosynthesis, transport and catabolism
IFM89_034775	At5g53050	7.32e-155	KOG4178	Soluble epoxide hydrolase	METABOLISM	I	Lipid transport and metabolism
IFM89_015064	At2g01670	5.89e-66	KOG2839	Diadenosine and diphosphoinositol polyphosphate phosphohydrolase	CELLULAR PROCESSES AND SIGNALING	T	Signal transduction mechanisms
IFM89_028401	Hs6005956	7.94e-27	KOG1716	Dual specificity phosphatase	CELLULAR PROCESSES AND SIGNALING	V	Defense mechanisms
IFM89_024554	At2g15480	2.1e-168	KOG1192	UDP-glucuronosyl and UDP-glucosyl transferase	METABOLISM	G	Carbohydrate transport and metabolism
IFM89_028953	At2g24500	7.86e-174	KOG2785	C2H2-type Zn-finger protein	POORLY CHARACTERIZED	R	General function prediction only
IFM89_005781	At1g79080	1.76e-18	KOG4197	FOG: PPR repeat	POORLY CHARACTERIZED	R	General function prediction only
novel.6607	At2g44890	9.02e-08	KOG0157	Cytochrome P450 CYP4/CYP19/CYP26 subfamilies	METABOLISM	Q	Secondary metabolites biosynthesis, transport and catabolism
novel.655	At1g03060_1	1.79e-128	KOG1788	Uncharacterized conserved protein	POORLY CHARACTERIZED	S	Function unknown
IFM89_002103	At2g46160	4.52e-16	KOG0800	FOG: Predicted E3 ubiquitin ligase	CELLULAR PROCESSES AND SIGNALING	O	Posttranslational modification, protein turnover, chaperones
IFM89_004583	At3g02100	1.48e-108	KOG1192	UDP-glucuronosyl and UDP-glucosyl transferase	METABOLISM	G	Carbohydrate transport and metabolism
IFM89_035004	At1g44900	0	KOG0477	DNA replication licensing factor, MCM2 component	INFORMATION STORAGE AND PROCESSING	L	Replication, recombination and repair
IFM89_018184	At5g52560	0	KOG2388	UDP-N-acetylglucosamine pyrophosphorylase	CELLULAR PROCESSES AND SIGNALING	M	Cell wall/membrane/envelope biogenesis
novel.8271	At5g08370	1.46e-31	KOG2366	Alpha-D-galactosidase (melibiase)	METABOLISM	G	Carbohydrate transport and metabolism
IFM89_034430	At5g39410	9e-224	KOG2733	Uncharacterized membrane protein	POORLY CHARACTERIZED	S	Function unknown
IFM89_021595	At2g47460	8.75e-57	KOG0048	Transcription factor, Myb superfamily	INFORMATION STORAGE AND PROCESSING	K	Transcription
IFM89_022769	At3g59030	1.02e-67	KOG1347	Uncharacterized membrane protein, predicted efflux pump	POORLY CHARACTERIZED	R	General function prediction only
IFM89_027685	At3g27060	1.14e-211	KOG1567	Ribonucleotide reductase, beta subunit	METABOLISM	F	Nucleotide transport and metabolism
IFM89_008070	At5g15490	0	KOG2666	UDP-glucose/GDP-mannose dehydrogenase	METABOLISM	G	Carbohydrate transport and metabolism
IFM89_012276	At1g07110	0	KOG0234	Fructose-6-phosphate 2-kinase/fructose-2,6-biphosphatase	METABOLISM	G	Carbohydrate transport and metabolism
IFM89_024760	At5g14180	1.05e-95	KOG2624	Triglyceride lipase-cholesterol esterase	METABOLISM	I	Lipid transport and metabolism
IFM89_012646	At5g65380	5.13e-170	KOG1347	Uncharacterized membrane protein, predicted efflux pump	POORLY CHARACTERIZED	R	General function prediction only
IFM89_006714	At5g60070	6.22e-38	KOG0504	FOG: Ankyrin repeat	POORLY CHARACTERIZED	R	General function prediction only
novel.3586	At3g19190	7.9e-14	KOG2993	Cytoplasm to vacuole targeting protein	CELLULAR PROCESSES AND SIGNALING	U	Intracellular trafficking, secretion, and vesicular transport
IFM89_005233	At3g57030	5.08e-171	KOG1520	Predicted alkaloid synthase/Surface mucin Hemomucin	POORLY CHARACTERIZED	R	General function prediction only
IFM89_008183	At1g18260	1.3e-15	KOG1550	Extracellular protein SEL-1 and related proteins	CELLULAR PROCESSES AND SIGNALING	M	Cell wall/membrane/envelope biogenesis
novel.8389	At2g43430	7.2e-31	KOG0813	Glyoxylase	POORLY CHARACTERIZED	R	General function prediction only
IFM89_012041	At1g26760	9.57e-67	KOG2084	Predicted histone tail methylase containing SET domain	INFORMATION STORAGE AND PROCESSING	B	Chromatin structure and dynamics
IFM89_017008	At3g61800	3.4e-188	KOG2374	Uncharacterized conserved protein	POORLY CHARACTERIZED	S	Function unknown
IFM89_023688	At3g12580	0	KOG0101	Molecular chaperones HSP70/HSC70, HSP70 superfamily	CELLULAR PROCESSES AND SIGNALING	O	Posttranslational modification, protein turnover, chaperones
IFM89_004946	At5g62740	1.5e-162	KOG2620	Prohibitins and stomatins of the PID superfamily	METABOLISM	C	Energy production and conversion
IFM89_010980	At1g19310	1.25e-89	KOG0823	Predicted E3 ubiquitin ligase	CELLULAR PROCESSES AND SIGNALING	O	Posttranslational modification, protein turnover, chaperones
IFM89_016695	At5g67470	3.68e-248	KOG1922	Rho GTPase effector BNI1 and related formins	CELLULAR PROCESSES AND SIGNALING	T	Signal transduction mechanisms
IFM89_006164	At1g55760	8.32e-168	KOG1987	Speckle-type POZ protein SPOP and related proteins with TRAF, MATH and BTB/POZ domains	CELLULAR PROCESSES AND SIGNALING	D	Cell cycle control, cell division, chromosome partitioning
IFM89_038340	At1g65430	2.39e-224	KOG1815	Predicted E3 ubiquitin ligase	CELLULAR PROCESSES AND SIGNALING	O	Posttranslational modification, protein turnover, chaperones
IFM89_005219	At5g64270	0	KOG0213	Splicing factor 3b, subunit 1	INFORMATION STORAGE AND PROCESSING	A	RNA processing and modification
IFM89_024850	At1g64350	1.7e-132	KOG2445	Nuclear pore complex component (sc Seh1)	CELLULAR PROCESSES AND SIGNALING	Y	Nuclear structure
IFM89_035085	At1g73720	7.38e-160	KOG0275	Conserved WD40 repeat-containing protein	POORLY CHARACTERIZED	R	General function prediction only
IFM89_023244	At3g62830	4.42e-242	KOG1429	dTDP-glucose 4-6-dehydratase/UDP-glucuronic acid decarboxylase	METABOLISM	G	Carbohydrate transport and metabolism
IFM89_016425	At5g21090	8e-55	KOG0619	FOG: Leucine rich repeat	POORLY CHARACTERIZED	R	General function prediction only
IFM89_039384	At1g79560	1.93e-13	KOG0731	AAA+-type ATPase containing the peptidase M41 domain	CELLULAR PROCESSES AND SIGNALING	O	Posttranslational modification, protein turnover, chaperones
IFM89_036064	At5g02230	3.75e-120	KOG3109	Haloacid dehalogenase-like hydrolase	POORLY CHARACTERIZED	R	General function prediction only
IFM89_022059	At2g42520	9.01e-236	KOG0335	ATP-dependent RNA helicase	INFORMATION STORAGE AND PROCESSING	A	RNA processing and modification
IFM89_024527	At4g38220	3.19e-102	KOG2275	Aminoacylase ACY1 and related metalloexopeptidases	METABOLISM	E	Amino acid transport and metabolism
IFM89_027332	At2g26830	1.14e-36	KOG4720	Ethanolamine kinase	METABOLISM	I	Lipid transport and metabolism
IFM89_020140	At2g28980	5.75e-06	KOG1075	FOG: Reverse transcriptase	POORLY CHARACTERIZED	R	General function prediction only
IFM89_036711	At1g12110	4.36e-248	KOG1237	H+/oligopeptide symporter	METABOLISM	E	Amino acid transport and metabolism
IFM89_000197	At5g24810	3.4e-260	KOG1235	Predicted unusual protein kinase	POORLY CHARACTERIZED	R	General function prediction only
IFM89_021429	At1g44170	8.93e-88	KOG2456	Aldehyde dehydrogenase	METABOLISM	C	Energy production and conversion
IFM89_018828	At5g57940	3.43e-230	KOG0498	K+-channel ERG and related proteins, contain PAS/PAC sensor domain	METABOLISM	P	Inorganic ion transport and metabolism
IFM89_002430	At4g15080	3.4e-104	KOG1311	DHHC-type Zn-finger proteins	POORLY CHARACTERIZED	R	General function prediction only
IFM89_017087	At3g52190	4.99e-155	KOG0771	Prolactin regulatory element-binding protein/Protein transport protein SEC12p	CELLULAR PROCESSES AND SIGNALING	U	Intracellular trafficking, secretion, and vesicular transport
IFM89_034539	At5g47240	1.83e-21	KOG0648	Predicted NUDIX hydrolase FGF-2 and related proteins	CELLULAR PROCESSES AND SIGNALING	T	Signal transduction mechanisms
IFM89_019699	At1g53300_1	1.35e-159	KOG1124	FOG: TPR repeat	POORLY CHARACTERIZED	R	General function prediction only
IFM89_020279	At4g27090	3.88e-69	KOG3421	60S ribosomal protein L14	INFORMATION STORAGE AND PROCESSING	J	Translation, ribosomal structure and biogenesis
IFM89_014967	At3g13750	0	KOG0496	Beta-galactosidase	METABOLISM	G	Carbohydrate transport and metabolism
IFM89_038472	At3g25700	3.56e-186	KOG1339	Aspartyl protease	CELLULAR PROCESSES AND SIGNALING	O	Posttranslational modification, protein turnover, chaperones
IFM89_017642	At3g10260	8.56e-97	KOG1792	Reticulon	CELLULAR PROCESSES AND SIGNALING	U	Intracellular trafficking, secretion, and vesicular transport
IFM89_027922	At3g11964	2.07e-32	KOG1070	rRNA processing protein Rrp5	INFORMATION STORAGE AND PROCESSING	A	RNA processing and modification
IFM89_014907	At5g12250	1.84e-158	KOG1375	Beta tubulin	CELLULAR PROCESSES AND SIGNALING	Z	Cytoskeleton
IFM89_018420	At1g69780	7.48e-65	KOG0483	Transcription factor HEX, contains HOX and HALZ domains	INFORMATION STORAGE AND PROCESSING	K	Transcription
IFM89_005037	At4g23460	0	KOG1061	Vesicle coat complex AP-1/AP-2/AP-4, beta subunit	CELLULAR PROCESSES AND SIGNALING	U	Intracellular trafficking, secretion, and vesicular transport
IFM89_029616	At4g23860	1.75e-130	KOG2752	Uncharacterized conserved protein, contains N-recognin-type Zn-finger	POORLY CHARACTERIZED	R	General function prediction only
IFM89_019603	At4g29680	8.3e-223	KOG2645	Type I phosphodiesterase/nucleotide pyrophosphatase	POORLY CHARACTERIZED	R	General function prediction only
IFM89_015857	At3g62950	5.56e-43	KOG1752	Glutaredoxin and related proteins	CELLULAR PROCESSES AND SIGNALING	O	Posttranslational modification, protein turnover, chaperones
IFM89_026128	At2g25950	3.96e-61	KOG1730	Thioredoxin-like protein	CELLULAR PROCESSES AND SIGNALING	O	Posttranslational modification, protein turnover, chaperones
IFM89_000482	At5g02560	2.65e-67	KOG1756	Histone 2A	INFORMATION STORAGE AND PROCESSING	B	Chromatin structure and dynamics
IFM89_000977	At3g05000	1.4e-82	KOG3316	Transport protein particle (TRAPP) complex subunit	CELLULAR PROCESSES AND SIGNALING	U	Intracellular trafficking, secretion, and vesicular transport
IFM89_021913	At1g48590	1.76e-81	KOG1030	Predicted Ca2+-dependent phospholipid-binding protein	POORLY CHARACTERIZED	R	General function prediction only
IFM89_015056	At2g40290	7.07e-14	KOG2916	Translation initiation factor 2, alpha subunit (eIF-2alpha)	INFORMATION STORAGE AND PROCESSING	J	Translation, ribosomal structure and biogenesis
IFM89_025181	At1g71220	0	KOG1879	UDP-glucose:glycoprotein glucosyltransferase	METABOLISM	G	Carbohydrate transport and metabolism
IFM89_027588	At5g12890	1.58e-132	KOG1192	UDP-glucuronosyl and UDP-glucosyl transferase	METABOLISM	G	Carbohydrate transport and metabolism
IFM89_017744	At4g20850	0	KOG1114	Tripeptidyl peptidase II	CELLULAR PROCESSES AND SIGNALING	O	Posttranslational modification, protein turnover, chaperones
IFM89_023956	At5g63140	6.84e-165	KOG1432	Predicted DNA repair exonuclease SIA1	POORLY CHARACTERIZED	R	General function prediction only
IFM89_025486	At5g67140	4.18e-95	KOG1947	Leucine rich repeat proteins, some proteins contain F-box	POORLY CHARACTERIZED	R	General function prediction only
IFM89_039883	At1g64150	2.27e-71	KOG2881	Predicted membrane protein	POORLY CHARACTERIZED	S	Function unknown
IFM89_029765	At1g79870	1.66e-162	KOG0069	Glyoxylate/hydroxypyruvate reductase (D-isomer-specific 2-hydroxy acid dehydrogenase superfamily)	METABOLISM	C	Energy production and conversion
IFM89_028046	At2g38060	1.22e-171	KOG2532	Permease of the major facilitator superfamily	METABOLISM	G	Carbohydrate transport and metabolism
IFM89_028493	At1g64600	1.63e-66	KOG2539	Mitochondrial/chloroplast ribosome small subunit component	INFORMATION STORAGE AND PROCESSING	J	Translation, ribosomal structure and biogenesis
IFM89_036388	At1g54170	4.34e-100	KOG2375	Protein interacting with poly(A)-binding protein	INFORMATION STORAGE AND PROCESSING	A	RNA processing and modification
novel.5968	At4g29130	1.16e-15	KOG1369	Hexokinase	METABOLISM	G	Carbohydrate transport and metabolism
IFM89_003157	At3g10520	6.68e-76	KOG3378	Globins and related hemoproteins	METABOLISM	C	Energy production and conversion
IFM89_037084	At4g22200	0	KOG0498	K+-channel ERG and related proteins, contain PAS/PAC sensor domain	METABOLISM	P	Inorganic ion transport and metabolism
IFM89_028473	At4g18700	1.25e-255	KOG0583	Serine/threonine protein kinase	CELLULAR PROCESSES AND SIGNALING	T	Signal transduction mechanisms
IFM89_038635	At1g22780	2.26e-100	KOG3311	Ribosomal protein S18	INFORMATION STORAGE AND PROCESSING	J	Translation, ribosomal structure and biogenesis
IFM89_032873	At2g27550	2.86e-84	KOG3346	Phosphatidylethanolamine binding protein	POORLY CHARACTERIZED	R	General function prediction only
IFM89_006133	At2g42910	3.48e-164	KOG1448	Ribose-phosphate pyrophosphokinase	METABOLISM	F	Nucleotide transport and metabolism
IFM89_009935	At3g10450	1.57e-165	KOG1282	Serine carboxypeptidases (lysosomal cathepsin A)	CELLULAR PROCESSES AND SIGNALING	O	Posttranslational modification, protein turnover, chaperones
IFM89_035777	At3g12580	3.66e-292	KOG0101	Molecular chaperones HSP70/HSC70, HSP70 superfamily	CELLULAR PROCESSES AND SIGNALING	O	Posttranslational modification, protein turnover, chaperones
IFM89_015292	At3g17180	1.54e-210	KOG1282	Serine carboxypeptidases (lysosomal cathepsin A)	CELLULAR PROCESSES AND SIGNALING	O	Posttranslational modification, protein turnover, chaperones
IFM89_022359	At3g07700	0	KOG1235	Predicted unusual protein kinase	POORLY CHARACTERIZED	R	General function prediction only
IFM89_003079	At1g04870	3.25e-151	KOG1499	Protein arginine N-methyltransferase PRMT1 and related enzymes	CELLULAR PROCESSES AND SIGNALING	O	Posttranslational modification, protein turnover, chaperones
novel.6536	At1g20930	6.01e-13	KOG0594	Protein kinase PCTAIRE and related kinases	POORLY CHARACTERIZED	R	General function prediction only
IFM89_013226	At3g19760	1.75e-155	KOG0328	Predicted ATP-dependent RNA helicase FAL1, involved in rRNA maturation, DEAD-box superfamily	INFORMATION STORAGE AND PROCESSING	J	Translation, ribosomal structure and biogenesis
IFM89_021689	At4g08320	3.97e-30	KOG0553	TPR repeat-containing protein	POORLY CHARACTERIZED	R	General function prediction only
novel.3923	At2g37790	3.99e-10	KOG1577	Aldo/keto reductase family proteins	POORLY CHARACTERIZED	R	General function prediction only
IFM89_027904	At3g45770	2.13e-158	KOG0025	Zn2+-binding dehydrogenase (nuclear receptor binding factor-1)	INFORMATION STORAGE AND PROCESSING	K	Transcription
IFM89_010483	At3g54420	3.81e-100	KOG4742	Predicted chitinase	POORLY CHARACTERIZED	R	General function prediction only
IFM89_011831	At1g55510	1.51e-196	KOG0525	Branched chain alpha-keto acid dehydrogenase E1, beta subunit	METABOLISM	C	Energy production and conversion
IFM89_012322	At1g21730	1.19e-304	KOG0242	Kinesin-like protein	CELLULAR PROCESSES AND SIGNALING	Z	Cytoskeleton
IFM89_031703	At1g15710	3.72e-101	KOG2380	Prephenate dehydrogenase (NADP+)	METABOLISM	E	Amino acid transport and metabolism
IFM89_017136	At2g16570	3.42e-240	KOG0572	Glutamine phosphoribosylpyrophosphate amidotransferase	METABOLISM	F	Nucleotide transport and metabolism
novel.8310	At5g23520	1.51e-42	KOG2401	Predicted MutS-related protein involved in mismatch repair	INFORMATION STORAGE AND PROCESSING	L	Replication, recombination and repair
IFM89_034605	At1g67820	4.92e-104	KOG0698	Serine/threonine protein phosphatase	CELLULAR PROCESSES AND SIGNALING	T	Signal transduction mechanisms
IFM89_038130	At3g19190	0	KOG2993	Cytoplasm to vacuole targeting protein	CELLULAR PROCESSES AND SIGNALING	U	Intracellular trafficking, secretion, and vesicular transport
IFM89_030232	At2g24590	2.12e-53	KOG0107	Alternative splicing factor SRp20/9G8 (RRM superfamily)	INFORMATION STORAGE AND PROCESSING	A	RNA processing and modification
IFM89_005390	At3g01470	8.9e-32	KOG0483	Transcription factor HEX, contains HOX and HALZ domains	INFORMATION STORAGE AND PROCESSING	K	Transcription
IFM89_020960	At2g45630	3.93e-114	KOG0069	Glyoxylate/hydroxypyruvate reductase (D-isomer-specific 2-hydroxy acid dehydrogenase superfamily)	METABOLISM	C	Energy production and conversion
IFM89_014890	At2g27990	7.65e-14	KOG0773	Transcription factor MEIS1 and related HOX domain proteins	INFORMATION STORAGE AND PROCESSING	K	Transcription
IFM89_014909	At5g12250	2.2e-42	KOG1375	Beta tubulin	CELLULAR PROCESSES AND SIGNALING	Z	Cytoskeleton
IFM89_034447	At5g15400	0	KOG2042	Ubiquitin fusion degradation protein-2	CELLULAR PROCESSES AND SIGNALING	O	Posttranslational modification, protein turnover, chaperones
IFM89_017332	At3g12760	4.02e-100	KOG3077	Uncharacterized conserved protein	POORLY CHARACTERIZED	S	Function unknown
IFM89_012661	At1g28560	1.92e-122	KOG2664	Small nuclear RNA activating protein complex - 50kD subunit (SNAP50)	INFORMATION STORAGE AND PROCESSING	K	Transcription
IFM89_009248	At3g44110	1.49e-67	KOG0712	Molecular chaperone (DnaJ superfamily)	CELLULAR PROCESSES AND SIGNALING	O	Posttranslational modification, protein turnover, chaperones
novel.7781	At1g68370	1.01e-08	KOG0713	Molecular chaperone (DnaJ superfamily)	CELLULAR PROCESSES AND SIGNALING	O	Posttranslational modification, protein turnover, chaperones
IFM89_012794	At5g19400	3.57e-243	KOG2162	Nonsense-mediated mRNA decay protein	INFORMATION STORAGE AND PROCESSING	A	RNA processing and modification
IFM89_010524	At1g04510	6.26e-264	KOG0289	mRNA splicing factor	POORLY CHARACTERIZED	R	General function prediction only
novel.7059	At5g23540	2.94e-33	KOG1555	26S proteasome regulatory complex, subunit RPN11	CELLULAR PROCESSES AND SIGNALING	O	Posttranslational modification, protein turnover, chaperones
novel.280	At1g20590	4.8e-09	KOG0653	Cyclin B and related kinase-activating proteins	CELLULAR PROCESSES AND SIGNALING	D	Cell cycle control, cell division, chromosome partitioning
IFM89_003670	At5g11200	2.2e-150	KOG0329	ATP-dependent RNA helicase	INFORMATION STORAGE AND PROCESSING	A	RNA processing and modification
IFM89_002814	At3g13690	1.09e-200	KOG1187	Serine/threonine protein kinase	CELLULAR PROCESSES AND SIGNALING	T	Signal transduction mechanisms
IFM89_038128	At5g63190	0	KOG0403	Neoplastic transformation suppressor Pdcd4/MA-3, contains MA3 domain	CELLULAR PROCESSES AND SIGNALING	T	Signal transduction mechanisms
IFM89_008004	At4g02060	0	KOG0482	DNA replication licensing factor, MCM7 component	INFORMATION STORAGE AND PROCESSING	L	Replication, recombination and repair
IFM89_033118	At2g35940	1.49e-146	KOG0773	Transcription factor MEIS1 and related HOX domain proteins	INFORMATION STORAGE AND PROCESSING	K	Transcription
IFM89_031301	At1g74680	2.34e-188	KOG1021	Acetylglucosaminyltransferase EXT1/exostosin 1	METABOLISM	G	Carbohydrate transport and metabolism
IFM89_011088	At5g66750	0	KOG0385	Chromatin remodeling complex WSTF-ISWI, small subunit	INFORMATION STORAGE AND PROCESSING	K	Transcription
IFM89_020999	At3g12170	3.55e-113	KOG0719	Molecular chaperone (DnaJ superfamily)	CELLULAR PROCESSES AND SIGNALING	O	Posttranslational modification, protein turnover, chaperones
IFM89_022662	At5g02880_1	1.35e-193	KOG0168	Putative ubiquitin fusion degradation protein	CELLULAR PROCESSES AND SIGNALING	O	Posttranslational modification, protein turnover, chaperones
IFM89_037108	At2g15480	8.44e-115	KOG1192	UDP-glucuronosyl and UDP-glucosyl transferase	METABOLISM	G	Carbohydrate transport and metabolism
IFM89_039960	At2g30770	3.49e-111	KOG0156	Cytochrome P450 CYP2 subfamily	METABOLISM	Q	Secondary metabolites biosynthesis, transport and catabolism
IFM89_000793	At1g74910	8.05e-223	KOG1460	GDP-mannose pyrophosphorylase	METABOLISM	G	Carbohydrate transport and metabolism
IFM89_035088	At1g08250	1.41e-87	KOG2797	Prephenate dehydratase	METABOLISM	E	Amino acid transport and metabolism
IFM89_015107	At3g27260	3.15e-45	KOG1474	Transcription initiation factor TFIID, subunit BDF1 and related bromodomain proteins	INFORMATION STORAGE AND PROCESSING	K	Transcription
IFM89_003456	At5g17900	3.32e-88	KOG1425	Microfibrillar-associated protein MFAP1	CELLULAR PROCESSES AND SIGNALING	Z	Cytoskeleton
IFM89_008268	At4g28860	7.66e-193	KOG1164	Casein kinase (serine/threonine/tyrosine protein kinase)	CELLULAR PROCESSES AND SIGNALING	T	Signal transduction mechanisms
IFM89_007625	At5g14040	3.04e-200	KOG0767	Mitochondrial phosphate carrier protein	METABOLISM	C	Energy production and conversion
novel.635	At1g20200	3.53e-18	KOG2581	26S proteasome regulatory complex, subunit RPN3/PSMD3	CELLULAR PROCESSES AND SIGNALING	O	Posttranslational modification, protein turnover, chaperones
IFM89_011009	At2g03870	1.01e-50	KOG1781	Small Nuclear ribonucleoprotein splicing factor	INFORMATION STORAGE AND PROCESSING	A	RNA processing and modification
IFM89_024163	At4g32650	1.17e-244	KOG0498	K+-channel ERG and related proteins, contain PAS/PAC sensor domain	METABOLISM	P	Inorganic ion transport and metabolism
IFM89_018822	At5g24360	4.71e-173	KOG1027	Serine/threonine protein kinase and endoribonuclease ERN1/IRE1, sensor of the unfolded protein response pathway	CELLULAR PROCESSES AND SIGNALING	T	Signal transduction mechanisms
IFM89_008893	At4g14580	2.3e-155	KOG0583	Serine/threonine protein kinase	CELLULAR PROCESSES AND SIGNALING	T	Signal transduction mechanisms
novel.7491	At1g80260	3.88e-10	KOG4344	Uncharacterized conserved protein	POORLY CHARACTERIZED	S	Function unknown
IFM89_036204	At2g23380	3.1e-231	KOG1079	Transcriptional repressor EZH1	INFORMATION STORAGE AND PROCESSING	K	Transcription
IFM89_013937	At2g41510	1.04e-146	KOG1231	Proteins containing the FAD binding domain	METABOLISM	C	Energy production and conversion
IFM89_020854	At3g17940	3.43e-168	KOG1604	Predicted mutarotase	METABOLISM	G	Carbohydrate transport and metabolism
novel.2508	At3g13750	7.25e-09	KOG0496	Beta-galactosidase	METABOLISM	G	Carbohydrate transport and metabolism
IFM89_009714	At4g05160	1.55e-246	KOG1176	Acyl-CoA synthetase	METABOLISM	I	Lipid transport and metabolism
IFM89_022432	At4g33640	3.31e-39	KOG3376	Uncharacterized conserved protein	POORLY CHARACTERIZED	S	Function unknown
IFM89_007420	At4g17680	3.8e-48	KOG1100	Predicted E3 ubiquitin ligase	CELLULAR PROCESSES AND SIGNALING	O	Posttranslational modification, protein turnover, chaperones
IFM89_000999	At3g23600	1.26e-121	KOG3043	Predicted hydrolase related to dienelactone hydrolase	POORLY CHARACTERIZED	R	General function prediction only
IFM89_027170	At3g14470	1.44e-17	KOG4658	Apoptotic ATPase	CELLULAR PROCESSES AND SIGNALING	T	Signal transduction mechanisms
IFM89_017077	At5g58070	1.02e-19	KOG4824	Apolipoprotein D/Lipocalin	CELLULAR PROCESSES AND SIGNALING	M	Cell wall/membrane/envelope biogenesis
novel.5523	At5g39350	2.94e-14	KOG4197	FOG: PPR repeat	POORLY CHARACTERIZED	R	General function prediction only
IFM89_010976	At1g07920	6.12e-54	KOG0052	Translation elongation factor EF-1 alpha/Tu	INFORMATION STORAGE AND PROCESSING	J	Translation, ribosomal structure and biogenesis
IFM89_015102	At4g38460	2.25e-126	KOG0776	Geranylgeranyl pyrophosphate synthase/Polyprenyl synthetase	METABOLISM	H	Coenzyme transport and metabolism
IFM89_021040	At3g23890	0	KOG0355	DNA topoisomerase type II	INFORMATION STORAGE AND PROCESSING	B	Chromatin structure and dynamics
IFM89_024490	At3g24530	4.7e-21	KOG0730	AAA+-type ATPase	CELLULAR PROCESSES AND SIGNALING	O	Posttranslational modification, protein turnover, chaperones
IFM89_037363	At3g10700	1.16e-139	KOG0631	Galactokinase	METABOLISM	G	Carbohydrate transport and metabolism
IFM89_002620	At5g13700	9.36e-147	KOG0029	Amine oxidase	METABOLISM	Q	Secondary metabolites biosynthesis, transport and catabolism
novel.6345	At2g17910	3.84e-50	KOG1075	FOG: Reverse transcriptase	POORLY CHARACTERIZED	R	General function prediction only
IFM89_012424	At4g30210	0	KOG1158	NADP/FAD dependent oxidoreductase	METABOLISM	C	Energy production and conversion
IFM89_010525	At1g04080	5.6e-182	KOG1258	mRNA processing protein	INFORMATION STORAGE AND PROCESSING	A	RNA processing and modification
IFM89_000562	At2g07050	0	KOG0497	Oxidosqualene-lanosterol cyclase and related proteins	METABOLISM	I	Lipid transport and metabolism
IFM89_033677	At5g02560	4.33e-76	KOG1756	Histone 2A	INFORMATION STORAGE AND PROCESSING	B	Chromatin structure and dynamics
IFM89_031818	At1g05680	5.23e-137	KOG1192	UDP-glucuronosyl and UDP-glucosyl transferase	METABOLISM	G	Carbohydrate transport and metabolism
IFM89_032831	At1g60200	2.32e-31	KOG2253	U1 snRNP complex, subunit SNU71 and related PWI-motif proteins	INFORMATION STORAGE AND PROCESSING	A	RNA processing and modification
IFM89_004513	At1g75510	8.26e-108	KOG2905	Transcription initiation factor IIF, small subunit (RAP30)	INFORMATION STORAGE AND PROCESSING	K	Transcription
IFM89_012591	At1g17020	1.31e-74	KOG0143	Iron/ascorbate family oxidoreductases	METABOLISM	Q	Secondary metabolites biosynthesis, transport and catabolism
IFM89_015337	At2g47250	0	KOG0925	mRNA splicing factor ATP-dependent RNA helicase	INFORMATION STORAGE AND PROCESSING	A	RNA processing and modification
IFM89_030515	At3g59990	8.5e-175	KOG2775	Metallopeptidase	POORLY CHARACTERIZED	R	General function prediction only
IFM89_037819	At5g60670	1.13e-104	KOG0886	40S ribosomal protein S2	INFORMATION STORAGE AND PROCESSING	J	Translation, ribosomal structure and biogenesis
IFM89_017800	At3g01150	3.52e-187	KOG1190	Polypyrimidine tract-binding protein	INFORMATION STORAGE AND PROCESSING	A	RNA processing and modification
IFM89_017519	At5g09420_1	3.52e-138	KOG1211	Amidases	INFORMATION STORAGE AND PROCESSING	J	Translation, ribosomal structure and biogenesis
IFM89_016671	At1g27460	3.07e-264	KOG4162	Predicted calmodulin-binding protein	CELLULAR PROCESSES AND SIGNALING	T	Signal transduction mechanisms
IFM89_006417	At3g04120	3.03e-175	KOG0657	Glyceraldehyde 3-phosphate dehydrogenase	METABOLISM	G	Carbohydrate transport and metabolism
IFM89_021734	At1g31930	0	KOG0082	G-protein alpha subunit (small G protein superfamily)	CELLULAR PROCESSES AND SIGNALING	D	Cell cycle control, cell division, chromosome partitioning
IFM89_016516	At4g27560	3.28e-149	KOG1192	UDP-glucuronosyl and UDP-glucosyl transferase	METABOLISM	G	Carbohydrate transport and metabolism
IFM89_000677	At1g56340	2.68e-186	KOG0674	Calreticulin	CELLULAR PROCESSES AND SIGNALING	O	Posttranslational modification, protein turnover, chaperones
IFM89_006165	At2g24710	3.6e-72	KOG1052	Glutamate-gated kainate-type ion channel receptor subunit GluR5 and related subunits	METABOLISM	P	Inorganic ion transport and metabolism
IFM89_013580	At5g19770	0	KOG1376	Alpha tubulin	CELLULAR PROCESSES AND SIGNALING	Z	Cytoskeleton
novel.4949	At3g18480	3.4e-17	KOG0963	Transcription factor/CCAAT displacement protein CDP1	INFORMATION STORAGE AND PROCESSING	K	Transcription
IFM89_012357	At2g13610	3.69e-303	KOG0061	Transporter, ABC superfamily (Breast cancer resistance protein)	METABOLISM	Q	Secondary metabolites biosynthesis, transport and catabolism
IFM89_023666	At5g37630	0	KOG2025	Chromosome condensation complex Condensin, subunit G	INFORMATION STORAGE AND PROCESSING	B	Chromatin structure and dynamics
IFM89_008112	At1g26480	1.14e-145	KOG0841	Multifunctional chaperone (14-3-3 family)	CELLULAR PROCESSES AND SIGNALING	O	Posttranslational modification, protein turnover, chaperones
IFM89_032109	At1g17020	4.83e-92	KOG0143	Iron/ascorbate family oxidoreductases	METABOLISM	Q	Secondary metabolites biosynthesis, transport and catabolism
IFM89_017643	At5g54160	2.51e-118	KOG3178	Hydroxyindole-O-methyltransferase and related SAM-dependent methyltransferases	POORLY CHARACTERIZED	R	General function prediction only
IFM89_016645	At3g19640	6.69e-180	KOG2662	Magnesium transporters: CorA family	METABOLISM	P	Inorganic ion transport and metabolism
IFM89_002015	At5g67050	8.89e-140	KOG4569	Predicted lipase	METABOLISM	I	Lipid transport and metabolism
novel.8079	At4g01310	1.59e-26	KOG0398	Mitochondrial/chloroplast ribosomal protein L5/L7	INFORMATION STORAGE AND PROCESSING	J	Translation, ribosomal structure and biogenesis
IFM89_021592	At5g19530	3.25e-177	KOG1562	Spermidine synthase	METABOLISM	E	Amino acid transport and metabolism
novel.5811	At4g03630	7.1e-10	KOG1947	Leucine rich repeat proteins, some proteins contain F-box	POORLY CHARACTERIZED	R	General function prediction only
novel.8688	At2g06190	4.85e-13	KOG0017	FOG: Transposon-encoded proteins with TYA, reverse transcriptase, integrase domains in various combinations	POORLY CHARACTERIZED	R	General function prediction only
novel.4638	At1g54430	1.73e-196	KOG0987	DNA helicase PIF1/RRM3	CELLULAR PROCESSES AND SIGNALING	D	Cell cycle control, cell division, chromosome partitioning
IFM89_026727	At3g04090	2.16e-77	KOG0223	Aquaporin (major intrinsic protein family)	METABOLISM	G	Carbohydrate transport and metabolism
IFM89_034172	At4g31860	2.59e-200	KOG0698	Serine/threonine protein phosphatase	CELLULAR PROCESSES AND SIGNALING	T	Signal transduction mechanisms
novel.4994	At5g10800	6.15e-29	KOG0151	Predicted splicing regulator, contains RRM, SWAP and RPR domains	POORLY CHARACTERIZED	R	General function prediction only
IFM89_039934	At3g19970	5.33e-141	KOG2521	Uncharacterized conserved protein	POORLY CHARACTERIZED	S	Function unknown
IFM89_002313	At2g38290	1.19e-205	KOG0682	Ammonia permease	METABOLISM	P	Inorganic ion transport and metabolism
IFM89_007700	At5g23250	2.22e-188	KOG1255	Succinyl-CoA synthetase, alpha subunit	METABOLISM	C	Energy production and conversion
novel.4227	At3g10370	2.01e-15	KOG0042	Glycerol-3-phosphate dehydrogenase	METABOLISM	C	Energy production and conversion
IFM89_010703	At5g43470	3.6e-44	KOG4658	Apoptotic ATPase	CELLULAR PROCESSES AND SIGNALING	T	Signal transduction mechanisms
IFM89_039455	At2g29420	8.09e-68	KOG0406	Glutathione S-transferase	CELLULAR PROCESSES AND SIGNALING	O	Posttranslational modification, protein turnover, chaperones
IFM89_000116	At1g12050	3.07e-240	KOG2843	Fumarylacetoacetase	METABOLISM	G	Carbohydrate transport and metabolism
IFM89_007607	At5g54080	5.34e-270	KOG1417	Homogentisate 1,2-dioxygenase	METABOLISM	E	Amino acid transport and metabolism
IFM89_038479	At3g14460	1.55e-15	KOG4658	Apoptotic ATPase	CELLULAR PROCESSES AND SIGNALING	T	Signal transduction mechanisms
IFM89_005793	At4g36360	0	KOG0496	Beta-galactosidase	METABOLISM	G	Carbohydrate transport and metabolism
IFM89_038873	At5g55230	1.59e-262	KOG4302	Microtubule-associated protein essential for anaphase spindle elongation	CELLULAR PROCESSES AND SIGNALING	D	Cell cycle control, cell division, chromosome partitioning
IFM89_017742	At3g57630	0	KOG1021	Acetylglucosaminyltransferase EXT1/exostosin 1	METABOLISM	G	Carbohydrate transport and metabolism
IFM89_033347	At2g36780	8.42e-196	KOG1192	UDP-glucuronosyl and UDP-glucosyl transferase	METABOLISM	G	Carbohydrate transport and metabolism
IFM89_026253	At3g25230	1.95e-286	KOG0543	FKBP-type peptidyl-prolyl cis-trans isomerase	CELLULAR PROCESSES AND SIGNALING	O	Posttranslational modification, protein turnover, chaperones
IFM89_013921	At5g60340_2	3.25e-49	KOG1206	Peroxisomal multifunctional beta-oxidation protein and related enzymes	METABOLISM	I	Lipid transport and metabolism
IFM89_014009	At2g37090	2.49e-113	KOG1476	Beta-1,3-glucuronyltransferase B3GAT1/SQV-8	CELLULAR PROCESSES AND SIGNALING	O	Posttranslational modification, protein turnover, chaperones
novel.8024	At4g22720	3.34e-41	KOG2708	Predicted metalloprotease with chaperone activity (RNAse H/HSP70 fold)	CELLULAR PROCESSES AND SIGNALING	O	Posttranslational modification, protein turnover, chaperones
IFM89_034040	At5g09220	1.13e-247	KOG1303	Amino acid transporters	METABOLISM	E	Amino acid transport and metabolism
IFM89_001408	At5g57990	1.62e-159	KOG1865	Ubiquitin carboxyl-terminal hydrolase	CELLULAR PROCESSES AND SIGNALING	O	Posttranslational modification, protein turnover, chaperones
novel.8385	At2g46280	6.66e-30	KOG0643	Translation initiation factor 3, subunit i (eIF-3i)/TGF-beta receptor-interacting protein (TRIP-1)	INFORMATION STORAGE AND PROCESSING	J	Translation, ribosomal structure and biogenesis
IFM89_015955	At2g43040	0	KOG4162	Predicted calmodulin-binding protein	CELLULAR PROCESSES AND SIGNALING	T	Signal transduction mechanisms
IFM89_003769	At5g03870	1.85e-19	KOG2824	Glutaredoxin-related protein	CELLULAR PROCESSES AND SIGNALING	O	Posttranslational modification, protein turnover, chaperones
IFM89_035423	At5g01520	4.97e-108	KOG1039	Predicted E3 ubiquitin ligase	CELLULAR PROCESSES AND SIGNALING	O	Posttranslational modification, protein turnover, chaperones
IFM89_035919	At4g02340	4.74e-66	KOG4178	Soluble epoxide hydrolase	METABOLISM	I	Lipid transport and metabolism
IFM89_023040	At3g24570	5.52e-85	KOG1944	Peroxisomal membrane protein MPV17 and related proteins	POORLY CHARACTERIZED	R	General function prediction only
IFM89_031892	At1g47480	2.35e-91	KOG1515	Arylacetamide deacetylase	CELLULAR PROCESSES AND SIGNALING	V	Defense mechanisms
IFM89_015991	At1g01330	1.12e-240	KOG1839	Uncharacterized protein CLU1/cluA/TIF31 involved in mitochondrial morphology/distribution, also found associated with eIF-3	POORLY CHARACTERIZED	R	General function prediction only
IFM89_031055	At3g52660	1.02e-96	KOG0117	Heterogeneous nuclear ribonucleoprotein R (RRM superfamily)	INFORMATION STORAGE AND PROCESSING	A	RNA processing and modification
IFM89_002555	At5g12250	8.99e-162	KOG1375	Beta tubulin	CELLULAR PROCESSES AND SIGNALING	Z	Cytoskeleton
IFM89_028503	At4g10890	5.23e-07	KOG4585	Predicted transposase	INFORMATION STORAGE AND PROCESSING	L	Replication, recombination and repair
IFM89_030824	At1g60690	7.4e-140	KOG1575	Voltage-gated shaker-like K+ channel, subunit beta/KCNAB	METABOLISM	C	Energy production and conversion
IFM89_039005	At2g34930	5.5e-20	KOG0619	FOG: Leucine rich repeat	POORLY CHARACTERIZED	R	General function prediction only
IFM89_002552	At3g43230	5.82e-47	KOG1843	Uncharacterized conserved protein	POORLY CHARACTERIZED	S	Function unknown
IFM89_036107	At2g02760	5.45e-110	KOG0419	Ubiquitin-protein ligase	CELLULAR PROCESSES AND SIGNALING	O	Posttranslational modification, protein turnover, chaperones
IFM89_009366	At4g35780	5.41e-242	KOG0192	Tyrosine kinase specific for activated (GTP-bound) p21cdc42Hs	CELLULAR PROCESSES AND SIGNALING	T	Signal transduction mechanisms
IFM89_021227	At3g56200	4.79e-162	KOG1305	Amino acid transporter protein	METABOLISM	E	Amino acid transport and metabolism
IFM89_025761	At4g02400	2.94e-233	KOG2172	Uncharacterized conserved protein	POORLY CHARACTERIZED	S	Function unknown
IFM89_004009	At3g21650	2.61e-261	KOG2085	Serine/threonine protein phosphatase 2A, regulatory subunit	CELLULAR PROCESSES AND SIGNALING	T	Signal transduction mechanisms
novel.981	At4g09710	4.71e-11	KOG1075	FOG: Reverse transcriptase	POORLY CHARACTERIZED	R	General function prediction only
IFM89_003208	At3g05280	3.74e-41	KOG3114	Uncharacterized conserved protein	POORLY CHARACTERIZED	S	Function unknown
IFM89_034769	At4g36220	1.5e-125	KOG0156	Cytochrome P450 CYP2 subfamily	METABOLISM	Q	Secondary metabolites biosynthesis, transport and catabolism
IFM89_037730	At5g18650	4.98e-137	KOG1940	Zn-finger protein	POORLY CHARACTERIZED	R	General function prediction only
IFM89_030580	At5g61530	4.52e-165	KOG4270	GTPase-activator protein	CELLULAR PROCESSES AND SIGNALING	T	Signal transduction mechanisms
novel.3101	At4g15600	4.53e-22	KOG1075	FOG: Reverse transcriptase	POORLY CHARACTERIZED	R	General function prediction only
IFM89_006520	At1g27320	0	KOG0519	Sensory transduction histidine kinase	CELLULAR PROCESSES AND SIGNALING	T	Signal transduction mechanisms
IFM89_031929	At3g19240	2.32e-247	KOG2395	Protein involved in vacuole import and degradation	CELLULAR PROCESSES AND SIGNALING	U	Intracellular trafficking, secretion, and vesicular transport
IFM89_031385	At5g47810	1.26e-231	KOG2440	Pyrophosphate-dependent phosphofructo-1-kinase	METABOLISM	G	Carbohydrate transport and metabolism
IFM89_021655	At5g57260	1.46e-42	KOG0156	Cytochrome P450 CYP2 subfamily	METABOLISM	Q	Secondary metabolites biosynthesis, transport and catabolism
IFM89_037103	At5g06900	2.18e-131	KOG0156	Cytochrome P450 CYP2 subfamily	METABOLISM	Q	Secondary metabolites biosynthesis, transport and catabolism
novel.6831	At3g56340	3.27e-12	KOG1768	40s ribosomal protein S26	INFORMATION STORAGE AND PROCESSING	J	Translation, ribosomal structure and biogenesis
IFM89_039410	At4g01270	1.37e-53	KOG0827	Predicted E3 ubiquitin ligase	CELLULAR PROCESSES AND SIGNALING	O	Posttranslational modification, protein turnover, chaperones
IFM89_017645	At2g34680	0	KOG0531	Protein phosphatase 1, regulatory subunit, and related proteins	CELLULAR PROCESSES AND SIGNALING	T	Signal transduction mechanisms
IFM89_005742	At3g51240	2.21e-210	KOG0143	Iron/ascorbate family oxidoreductases	METABOLISM	Q	Secondary metabolites biosynthesis, transport and catabolism
IFM89_028097	At3g59030	1.13e-57	KOG1347	Uncharacterized membrane protein, predicted efflux pump	POORLY CHARACTERIZED	R	General function prediction only
IFM89_015501	At2g32340_2	3.1e-42	KOG2860	Uncharacterized conserved protein, contains TraB domain	CELLULAR PROCESSES AND SIGNALING	T	Signal transduction mechanisms
IFM89_033645	At1g67480	2.94e-161	KOG1072	FOG: Kelch repeat	POORLY CHARACTERIZED	R	General function prediction only
IFM89_011087	At5g54160	5.36e-123	KOG3178	Hydroxyindole-O-methyltransferase and related SAM-dependent methyltransferases	POORLY CHARACTERIZED	R	General function prediction only
IFM89_021674	At3g13750	0	KOG0496	Beta-galactosidase	METABOLISM	G	Carbohydrate transport and metabolism
IFM89_032839	At1g79000	0	KOG1778	CREB binding protein/P300 and related TAZ Zn-finger proteins	INFORMATION STORAGE AND PROCESSING	K	Transcription
IFM89_032939	At5g45680	5.81e-44	KOG0549	FKBP-type peptidyl-prolyl cis-trans isomerase	CELLULAR PROCESSES AND SIGNALING	O	Posttranslational modification, protein turnover, chaperones
IFM89_020545	At2g36060	1.51e-90	KOG0896	Ubiquitin-conjugating enzyme E2	CELLULAR PROCESSES AND SIGNALING	O	Posttranslational modification, protein turnover, chaperones
IFM89_006112	At1g78530	3.61e-136	KOG1187	Serine/threonine protein kinase	CELLULAR PROCESSES AND SIGNALING	T	Signal transduction mechanisms
IFM89_005176	At3g58640	0	KOG0192	Tyrosine kinase specific for activated (GTP-bound) p21cdc42Hs	CELLULAR PROCESSES AND SIGNALING	T	Signal transduction mechanisms
novel.8341	At3g03080	1.74e-25	KOG1196	Predicted NAD-dependent oxidoreductase	POORLY CHARACTERIZED	R	General function prediction only
IFM89_038513	At3g59140	0	KOG0054	Multidrug resistance-associated protein/mitoxantrone resistance protein, ABC superfamily	METABOLISM	Q	Secondary metabolites biosynthesis, transport and catabolism
IFM89_026968	At3g23990	1.49e-140	KOG0356	Mitochondrial chaperonin, Cpn60/Hsp60p	CELLULAR PROCESSES AND SIGNALING	O	Posttranslational modification, protein turnover, chaperones
IFM89_016841	At1g06650	1.5e-108	KOG0143	Iron/ascorbate family oxidoreductases	METABOLISM	Q	Secondary metabolites biosynthesis, transport and catabolism
IFM89_029110	At1g28260	7.35e-144	KOG2162	Nonsense-mediated mRNA decay protein	INFORMATION STORAGE AND PROCESSING	A	RNA processing and modification
IFM89_016922	At1g48850	1.43e-32	KOG4492	Chorismate synthase	METABOLISM	E	Amino acid transport and metabolism
IFM89_032068	At2g22740_2	2.4e-119	KOG1082	Histone H3 (Lys9) methyltransferase SUV39H1/Clr4, required for transcriptional silencing	INFORMATION STORAGE AND PROCESSING	B	Chromatin structure and dynamics
IFM89_008182	At4g24380	2.21e-96	KOG2551	Phospholipase/carboxyhydrolase	METABOLISM	E	Amino acid transport and metabolism
novel.840	At3g02320	9.97e-15	KOG1253	tRNA methyltransferase	INFORMATION STORAGE AND PROCESSING	J	Translation, ribosomal structure and biogenesis
IFM89_020636	At1g63000	2.56e-194	KOG0747	Putative NAD+-dependent epimerases	METABOLISM	G	Carbohydrate transport and metabolism
IFM89_011501	At3g16360	3.45e-59	KOG4747	Two-component phosphorelay intermediate involved in MAP kinase cascade regulation	CELLULAR PROCESSES AND SIGNALING	T	Signal transduction mechanisms
IFM89_004264	At1g23800	1.31e-188	KOG2450	Aldehyde dehydrogenase	METABOLISM	C	Energy production and conversion
IFM89_004445	At1g79560	0	KOG0731	AAA+-type ATPase containing the peptidase M41 domain	CELLULAR PROCESSES AND SIGNALING	O	Posttranslational modification, protein turnover, chaperones
IFM89_036718	At5g47080	3.49e-145	KOG3092	Casein kinase II, beta subunit	CELLULAR PROCESSES AND SIGNALING	T	Signal transduction mechanisms
IFM89_035262	At1g11860	9.44e-102	KOG2770	Aminomethyl transferase	METABOLISM	E	Amino acid transport and metabolism
IFM89_018664	At5g02500	5.84e-204	KOG0101	Molecular chaperones HSP70/HSC70, HSP70 superfamily	CELLULAR PROCESSES AND SIGNALING	O	Posttranslational modification, protein turnover, chaperones
IFM89_034303	At1g66230	1.98e-83	KOG0048	Transcription factor, Myb superfamily	INFORMATION STORAGE AND PROCESSING	K	Transcription
IFM89_021699	At1g07660	2.32e-67	KOG3467	Histone H4	INFORMATION STORAGE AND PROCESSING	B	Chromatin structure and dynamics
IFM89_017974	At1g66980_2	1.41e-37	KOG1187	Serine/threonine protein kinase	CELLULAR PROCESSES AND SIGNALING	T	Signal transduction mechanisms
IFM89_035281	At1g11910	1.97e-280	KOG1339	Aspartyl protease	CELLULAR PROCESSES AND SIGNALING	O	Posttranslational modification, protein turnover, chaperones
IFM89_037667	At2g25180	2.07e-118	KOG1601	GATA-4/5/6 transcription factors	INFORMATION STORAGE AND PROCESSING	K	Transcription
IFM89_021044	At3g23890	2.84e-16	KOG0355	DNA topoisomerase type II	INFORMATION STORAGE AND PROCESSING	B	Chromatin structure and dynamics
IFM89_028762	At1g75780	5.67e-44	KOG1375	Beta tubulin	CELLULAR PROCESSES AND SIGNALING	Z	Cytoskeleton
IFM89_022728	At4g00330	3.79e-147	KOG1187	Serine/threonine protein kinase	CELLULAR PROCESSES AND SIGNALING	T	Signal transduction mechanisms
IFM89_023104	Hs7661874	1.31e-08	KOG2953	mRNA-binding protein Encore	INFORMATION STORAGE AND PROCESSING	A	RNA processing and modification
IFM89_001004	At3g06140	1.84e-14	KOG4265	Predicted E3 ubiquitin ligase	CELLULAR PROCESSES AND SIGNALING	O	Posttranslational modification, protein turnover, chaperones
IFM89_036270	At4g34200	0	KOG0068	D-3-phosphoglycerate dehydrogenase, D-isomer-specific 2-hydroxy acid dehydrogenase superfamily	METABOLISM	E	Amino acid transport and metabolism
IFM89_004052	At5g16120	1.17e-137	KOG1455	Lysophospholipase	METABOLISM	I	Lipid transport and metabolism
IFM89_005618	At5g65720	1.63e-248	KOG1549	Cysteine desulfurase NFS1	METABOLISM	E	Amino acid transport and metabolism
IFM89_023799	At5g24510	8.59e-24	KOG1762	60s acidic ribosomal protein P1	INFORMATION STORAGE AND PROCESSING	J	Translation, ribosomal structure and biogenesis
novel.4652	At1g25510	1.22e-34	KOG1339	Aspartyl protease	CELLULAR PROCESSES AND SIGNALING	O	Posttranslational modification, protein turnover, chaperones
IFM89_003489	At5g05260	3.52e-223	KOG0156	Cytochrome P450 CYP2 subfamily	METABOLISM	Q	Secondary metabolites biosynthesis, transport and catabolism
IFM89_012141	At1g55840	1.17e-157	KOG1471	Phosphatidylinositol transfer protein SEC14 and related proteins	METABOLISM	I	Lipid transport and metabolism
IFM89_010994	At5g26310	3.96e-128	KOG1192	UDP-glucuronosyl and UDP-glucosyl transferase	METABOLISM	G	Carbohydrate transport and metabolism
IFM89_011972	At5g52210	2.95e-107	KOG0076	GTP-binding ADP-ribosylation factor-like protein yARL3	CELLULAR PROCESSES AND SIGNALING	U	Intracellular trafficking, secretion, and vesicular transport
IFM89_030880	At2g45510	2.43e-172	KOG0157	Cytochrome P450 CYP4/CYP19/CYP26 subfamilies	METABOLISM	Q	Secondary metabolites biosynthesis, transport and catabolism
IFM89_014903	At1g23090	7.74e-271	KOG0236	Sulfate/bicarbonate/oxalate exchanger SAT-1 and related transporters (SLC26 family)	METABOLISM	P	Inorganic ion transport and metabolism
IFM89_028878	At3g09880	8.68e-250	KOG2085	Serine/threonine protein phosphatase 2A, regulatory subunit	CELLULAR PROCESSES AND SIGNALING	T	Signal transduction mechanisms
IFM89_012779	At5g09410	9.5e-178	KOG0520	Uncharacterized conserved protein, contains IPT/TIG domain	POORLY CHARACTERIZED	S	Function unknown
IFM89_011002	At4g36740	4.13e-51	KOG0483	Transcription factor HEX, contains HOX and HALZ domains	INFORMATION STORAGE AND PROCESSING	K	Transcription
IFM89_004452	At2g35110	0	KOG1917	Membrane-associated hematopoietic protein	POORLY CHARACTERIZED	R	General function prediction only
IFM89_010163	At4g30400	4.56e-128	KOG0800	FOG: Predicted E3 ubiquitin ligase	CELLULAR PROCESSES AND SIGNALING	O	Posttranslational modification, protein turnover, chaperones
IFM89_019902	At3g07130	2.39e-276	KOG1378	Purple acid phosphatase	METABOLISM	G	Carbohydrate transport and metabolism
IFM89_004225	At5g25510	2.23e-256	KOG2085	Serine/threonine protein phosphatase 2A, regulatory subunit	CELLULAR PROCESSES AND SIGNALING	T	Signal transduction mechanisms
IFM89_003574	At1g08630	5.35e-175	KOG1368	Threonine aldolase	METABOLISM	E	Amino acid transport and metabolism
IFM89_031353	At1g26780	2.02e-71	KOG0048	Transcription factor, Myb superfamily	INFORMATION STORAGE AND PROCESSING	K	Transcription
IFM89_006139	At3g48700	5.04e-78	KOG1515	Arylacetamide deacetylase	CELLULAR PROCESSES AND SIGNALING	V	Defense mechanisms
IFM89_014828	At5g56750	6.27e-183	KOG2931	Differentiation-related gene 1 protein (NDR1 protein), related proteins	POORLY CHARACTERIZED	S	Function unknown
IFM89_012601	At2g27870	4.54e-11	KOG1075	FOG: Reverse transcriptase	POORLY CHARACTERIZED	R	General function prediction only
novel.305	At3g50100	4.05e-08	KOG2248	3'-5' exonuclease	INFORMATION STORAGE AND PROCESSING	L	Replication, recombination and repair
IFM89_003785	At1g77210	1.7e-264	KOG0254	Predicted transporter (major facilitator superfamily)	POORLY CHARACTERIZED	R	General function prediction only
novel.6808	At1g79440	2.16e-10	KOG2451	Aldehyde dehydrogenase	METABOLISM	C	Energy production and conversion
IFM89_037272	At4g28080	1.54e-29	KOG1839	Uncharacterized protein CLU1/cluA/TIF31 involved in mitochondrial morphology/distribution, also found associated with eIF-3	POORLY CHARACTERIZED	R	General function prediction only
IFM89_036790	At5g06000	3.45e-13	KOG0122	Translation initiation factor 3, subunit g (eIF-3g)	INFORMATION STORAGE AND PROCESSING	J	Translation, ribosomal structure and biogenesis
IFM89_011851	At5g55100	8.54e-113	KOG1847	mRNA splicing factor	INFORMATION STORAGE AND PROCESSING	A	RNA processing and modification
IFM89_029533	At3g58600	4.58e-97	KOG2500	Uncharacterized conserved protein	POORLY CHARACTERIZED	S	Function unknown
IFM89_017600	At2g30860	3.15e-97	KOG0867	Glutathione S-transferase	CELLULAR PROCESSES AND SIGNALING	O	Posttranslational modification, protein turnover, chaperones
novel.1568	At1g48170	4.62e-28	KOG1018	Cytosine deaminase FCY1 and related enzymes	METABOLISM	F	Nucleotide transport and metabolism
IFM89_023612	At3g27100	1.99e-15	KOG4479	Transcription factor e(y)2	INFORMATION STORAGE AND PROCESSING	K	Transcription
IFM89_010586	At2g47470	7.34e-194	KOG0191	Thioredoxin/protein disulfide isomerase	CELLULAR PROCESSES AND SIGNALING	O	Posttranslational modification, protein turnover, chaperones
IFM89_029635	At4g27890	2.99e-92	KOG2265	Nuclear distribution protein NUDC	CELLULAR PROCESSES AND SIGNALING	T	Signal transduction mechanisms
IFM89_016305	At1g56720	3.5e-260	KOG1187	Serine/threonine protein kinase	CELLULAR PROCESSES AND SIGNALING	T	Signal transduction mechanisms
IFM89_016159	At5g16710_1	1.38e-99	KOG1422	Intracellular Cl- channel CLIC, contains GST domain	METABOLISM	P	Inorganic ion transport and metabolism
IFM89_005798	At1g09850_1	7.35e-102	KOG1543	Cysteine proteinase Cathepsin L	CELLULAR PROCESSES AND SIGNALING	O	Posttranslational modification, protein turnover, chaperones
IFM89_033585	At3g43790	4.45e-15	KOG2615	Permease of the major facilitator superfamily	POORLY CHARACTERIZED	R	General function prediction only
IFM89_017054	At5g24270	7.86e-18	KOG0034	Ca2+/calmodulin-dependent protein phosphatase (calcineurin subunit B), EF-Hand superfamily protein	CELLULAR PROCESSES AND SIGNALING	T	Signal transduction mechanisms
IFM89_018529	At5g52260	1.33e-59	KOG0048	Transcription factor, Myb superfamily	INFORMATION STORAGE AND PROCESSING	K	Transcription
IFM89_009007	At5g01320	6.99e-110	KOG1184	Thiamine pyrophosphate-requiring enzyme	METABOLISM	E	Amino acid transport and metabolism
IFM89_013823	At1g01040	0	KOG0701	dsRNA-specific nuclease Dicer and related ribonucleases	INFORMATION STORAGE AND PROCESSING	A	RNA processing and modification
IFM89_017356	At3g63470	2.14e-201	KOG1282	Serine carboxypeptidases (lysosomal cathepsin A)	CELLULAR PROCESSES AND SIGNALING	O	Posttranslational modification, protein turnover, chaperones
IFM89_037638	At2g16440	0	KOG0478	DNA replication licensing factor, MCM4 component	INFORMATION STORAGE AND PROCESSING	L	Replication, recombination and repair
IFM89_036384	At5g13710	8.18e-15	KOG1269	SAM-dependent methyltransferases	METABOLISM	I	Lipid transport and metabolism
IFM89_020527	At5g55230	2.54e-46	KOG4302	Microtubule-associated protein essential for anaphase spindle elongation	CELLULAR PROCESSES AND SIGNALING	D	Cell cycle control, cell division, chromosome partitioning
IFM89_010496	At3g44830	5.36e-30	KOG2369	Lecithin:cholesterol acyltransferase (LCAT)/Acyl-ceramide synthase	METABOLISM	I	Lipid transport and metabolism
IFM89_038470	At1g03280	2.31e-149	KOG2593	Transcription initiation factor IIE, alpha subunit	INFORMATION STORAGE AND PROCESSING	K	Transcription
IFM89_028740	At1g30690	1.97e-125	KOG1471	Phosphatidylinositol transfer protein SEC14 and related proteins	METABOLISM	I	Lipid transport and metabolism
IFM89_023251	At5g61770	7.57e-154	KOG2963	RNA-binding protein required for 60S ribosomal subunit biogenesis	INFORMATION STORAGE AND PROCESSING	J	Translation, ribosomal structure and biogenesis
IFM89_009659	At4g17970	9.71e-83	KOG4711	Predicted membrane protein	POORLY CHARACTERIZED	R	General function prediction only
IFM89_022998	At1g12390	2.87e-60	KOG2729	ER vesicle integral membrane protein involved in establishing cell polarity, signaling and protein degradation	CELLULAR PROCESSES AND SIGNALING	O	Posttranslational modification, protein turnover, chaperones
IFM89_028571	At4g25050	2.79e-19	KOG1748	Acyl carrier protein/NADH-ubiquinone oxidoreductase, NDUFAB1/SDAP subunit	METABOLISM	C	Energy production and conversion
IFM89_034839	At5g19290	3e-177	KOG1455	Lysophospholipase	METABOLISM	I	Lipid transport and metabolism
IFM89_017907	At3g08820	5.81e-166	KOG4197	FOG: PPR repeat	POORLY CHARACTERIZED	R	General function prediction only
IFM89_014886	At2g39020	3.28e-96	KOG3216	Diamine acetyltransferase	METABOLISM	E	Amino acid transport and metabolism
IFM89_001467	At4g18550	3.79e-173	KOG4569	Predicted lipase	METABOLISM	I	Lipid transport and metabolism
IFM89_022376	At1g69780	1.06e-90	KOG0483	Transcription factor HEX, contains HOX and HALZ domains	INFORMATION STORAGE AND PROCESSING	K	Transcription
IFM89_023635	At1g13080	2.04e-43	KOG0156	Cytochrome P450 CYP2 subfamily	METABOLISM	Q	Secondary metabolites biosynthesis, transport and catabolism
IFM89_002969	At1g78010	4.46e-112	KOG1191	Mitochondrial GTPase	INFORMATION STORAGE AND PROCESSING	J	Translation, ribosomal structure and biogenesis
IFM89_037672	At4g30990	3.77e-64	KOG1823	DRIM (Down-regulated in metastasis)-like proteins	CELLULAR PROCESSES AND SIGNALING	V	Defense mechanisms
IFM89_029692	At4g27740	2.42e-57	KOG3399	Predicted Yippee-type zinc-binding protein	POORLY CHARACTERIZED	R	General function prediction only
IFM89_002353	At4g02610	8.69e-147	KOG4175	Tryptophan synthase alpha chain	METABOLISM	E	Amino acid transport and metabolism
IFM89_039875	At5g52920	1.83e-255	KOG2323	Pyruvate kinase	METABOLISM	G	Carbohydrate transport and metabolism
IFM89_034902	At3g46210	3.72e-115	KOG1069	Exosomal 3'-5' exoribonuclease complex, subunit Rrp46	INFORMATION STORAGE AND PROCESSING	J	Translation, ribosomal structure and biogenesis
IFM89_007550	At5g16990	3.94e-51	KOG1196	Predicted NAD-dependent oxidoreductase	POORLY CHARACTERIZED	R	General function prediction only
IFM89_008574	At1g22360	9.98e-228	KOG1192	UDP-glucuronosyl and UDP-glucosyl transferase	METABOLISM	G	Carbohydrate transport and metabolism
IFM89_015948	At5g04660	2.5e-238	KOG0156	Cytochrome P450 CYP2 subfamily	METABOLISM	Q	Secondary metabolites biosynthesis, transport and catabolism
novel.3666	At3g27360	8.55e-32	KOG1745	Histones H3 and H4	INFORMATION STORAGE AND PROCESSING	B	Chromatin structure and dynamics
IFM89_023474	At5g59910	4.06e-63	KOG1744	Histone H2B	INFORMATION STORAGE AND PROCESSING	B	Chromatin structure and dynamics
IFM89_019326	At3g61650	2.15e-263	KOG1374	Gamma tubulin	CELLULAR PROCESSES AND SIGNALING	Z	Cytoskeleton
IFM89_019402	At2g34960	0	KOG1286	Amino acid transporters	METABOLISM	E	Amino acid transport and metabolism
IFM89_030408	At3g12280	0	KOG1010	Rb (Retinoblastoma tumor suppressor)-related protein	CELLULAR PROCESSES AND SIGNALING	D	Cell cycle control, cell division, chromosome partitioning
IFM89_015879	At3g21510	2.83e-18	KOG4747	Two-component phosphorelay intermediate involved in MAP kinase cascade regulation	CELLULAR PROCESSES AND SIGNALING	T	Signal transduction mechanisms
IFM89_024248	At2g40430	1.86e-90	KOG2823	Cellular protein (glioma tumor suppressor candidate region gene 2)	POORLY CHARACTERIZED	R	General function prediction only
IFM89_028296	At5g04760	2.39e-67	KOG0724	Zuotin and related molecular chaperones (DnaJ superfamily), contains DNA-binding domains	CELLULAR PROCESSES AND SIGNALING	O	Posttranslational modification, protein turnover, chaperones
IFM89_029360	At5g27720	6.11e-53	KOG3293	Small nuclear ribonucleoprotein (snRNP)	INFORMATION STORAGE AND PROCESSING	A	RNA processing and modification
novel.3487	At2g13260	7.01e-08	KOG0017	FOG: Transposon-encoded proteins with TYA, reverse transcriptase, integrase domains in various combinations	POORLY CHARACTERIZED	R	General function prediction only
IFM89_016220	At4g36670	1.42e-198	KOG0254	Predicted transporter (major facilitator superfamily)	POORLY CHARACTERIZED	R	General function prediction only
IFM89_033857	At5g33320	6.71e-123	KOG1441	Glucose-6-phosphate/phosphate and phosphoenolpyruvate/phosphate antiporter	METABOLISM	G	Carbohydrate transport and metabolism
novel.8750	At2g18670	4.9e-17	KOG0800	FOG: Predicted E3 ubiquitin ligase	CELLULAR PROCESSES AND SIGNALING	O	Posttranslational modification, protein turnover, chaperones
IFM89_038865	At2g20190	1.13e-51	KOG2956	CLIP-associating protein	POORLY CHARACTERIZED	R	General function prediction only
IFM89_012575	At5g12250	3.68e-201	KOG1375	Beta tubulin	CELLULAR PROCESSES AND SIGNALING	Z	Cytoskeleton
IFM89_024884	At1g08360	1.94e-116	KOG1570	60S ribosomal protein L10A	INFORMATION STORAGE AND PROCESSING	J	Translation, ribosomal structure and biogenesis
IFM89_007997	At1g64650	2.32e-31	KOG4332	Predicted sugar transporter	METABOLISM	G	Carbohydrate transport and metabolism
novel.7342	At1g47910	4.64e-103	KOG1075	FOG: Reverse transcriptase	POORLY CHARACTERIZED	R	General function prediction only
IFM89_036995	At5g58620	8.17e-79	KOG1595	CCCH-type Zn-finger protein	POORLY CHARACTERIZED	R	General function prediction only
IFM89_010375	At1g02630	2.48e-157	KOG1479	Nucleoside transporter	METABOLISM	F	Nucleotide transport and metabolism
IFM89_008155	At1g74240	1.53e-49	KOG0770	Predicted mitochondrial carrier protein	METABOLISM	C	Energy production and conversion
IFM89_037305	At1g05010	2.63e-169	KOG0143	Iron/ascorbate family oxidoreductases	METABOLISM	Q	Secondary metabolites biosynthesis, transport and catabolism
IFM89_007683	At3g19970	3.11e-140	KOG2521	Uncharacterized conserved protein	POORLY CHARACTERIZED	S	Function unknown
novel.8969	At1g64550	1.13e-23	KOG0062	ATPase component of ABC transporters with duplicated ATPase domains/Translation elongation factor EF-3b	METABOLISM	E	Amino acid transport and metabolism
IFM89_021795	At3g27360	8.68e-49	KOG1745	Histones H3 and H4	INFORMATION STORAGE AND PROCESSING	B	Chromatin structure and dynamics
IFM89_038967	At5g35980	3.48e-41	KOG0667	Dual-specificity tyrosine-phosphorylation regulated kinase	POORLY CHARACTERIZED	R	General function prediction only
IFM89_039773	At5g55660	5.8e-43	KOG2266	Chromatin-associated protein Dek and related proteins, contains SAP DNA binding domain	INFORMATION STORAGE AND PROCESSING	B	Chromatin structure and dynamics
IFM89_014500	At2g16600	6.66e-107	KOG0865	Cyclophilin type peptidyl-prolyl cis-trans isomerase	CELLULAR PROCESSES AND SIGNALING	O	Posttranslational modification, protein turnover, chaperones
IFM89_021361	At4g01070	4.06e-217	KOG1192	UDP-glucuronosyl and UDP-glucosyl transferase	METABOLISM	G	Carbohydrate transport and metabolism
IFM89_028524	At1g17370	1.02e-207	KOG0118	FOG: RRM domain	POORLY CHARACTERIZED	R	General function prediction only
IFM89_020728	At3g60770	2.06e-44	KOG0400	40S ribosomal protein S13	INFORMATION STORAGE AND PROCESSING	J	Translation, ribosomal structure and biogenesis
IFM89_021299	At1g10580	5.3e-213	KOG0282	mRNA splicing factor	POORLY CHARACTERIZED	S	Function unknown
IFM89_015826	At3g62760	5.06e-89	KOG0867	Glutathione S-transferase	CELLULAR PROCESSES AND SIGNALING	O	Posttranslational modification, protein turnover, chaperones
IFM89_014774	At4g36220	1.84e-261	KOG0156	Cytochrome P450 CYP2 subfamily	METABOLISM	Q	Secondary metabolites biosynthesis, transport and catabolism
IFM89_036191	At1g02850	6.36e-170	KOG0626	Beta-glucosidase, lactase phlorizinhydrolase, and related proteins	METABOLISM	G	Carbohydrate transport and metabolism
novel.1579	At5g10220	2.01e-08	KOG0819	Annexin	CELLULAR PROCESSES AND SIGNALING	U	Intracellular trafficking, secretion, and vesicular transport
IFM89_010103	At1g19250	1.34e-116	KOG1399	Flavin-containing monooxygenase	METABOLISM	Q	Secondary metabolites biosynthesis, transport and catabolism
novel.7458	At4g26360	1.76e-85	KOG1075	FOG: Reverse transcriptase	POORLY CHARACTERIZED	R	General function prediction only
IFM89_028986	At2g24520	7.9e-125	KOG0205	Plasma membrane H+-transporting ATPase	METABOLISM	P	Inorganic ion transport and metabolism
IFM89_001021	At3g27360	7.07e-89	KOG1745	Histones H3 and H4	INFORMATION STORAGE AND PROCESSING	B	Chromatin structure and dynamics
IFM89_007897	At5g08080	5.83e-135	KOG0810	SNARE protein Syntaxin 1 and related proteins	CELLULAR PROCESSES AND SIGNALING	U	Intracellular trafficking, secretion, and vesicular transport
IFM89_011224	At3g47430	6.55e-73	KOG4186	Peroxisomal biogenesis protein (peroxin)	CELLULAR PROCESSES AND SIGNALING	U	Intracellular trafficking, secretion, and vesicular transport
IFM89_039307	At2g46220	3.85e-14	KOG2546	Abl interactor ABI-1, contains SH3 domain	CELLULAR PROCESSES AND SIGNALING	T	Signal transduction mechanisms
IFM89_020334	At1g62020	0	KOG0292	Vesicle coat complex COPI, alpha subunit	CELLULAR PROCESSES AND SIGNALING	U	Intracellular trafficking, secretion, and vesicular transport
IFM89_038814	At1g07990	1.26e-225	KOG2073	SAP family cell cycle dependent phosphatase-associated protein	CELLULAR PROCESSES AND SIGNALING	D	Cell cycle control, cell division, chromosome partitioning
IFM89_017236	At5g06900	1.1e-174	KOG0156	Cytochrome P450 CYP2 subfamily	METABOLISM	Q	Secondary metabolites biosynthesis, transport and catabolism
IFM89_036408	At2g22240	3.01e-49	KOG0693	Myo-inositol-1-phosphate synthase	METABOLISM	I	Lipid transport and metabolism
IFM89_018353	At1g43710	9.17e-283	KOG0629	Glutamate decarboxylase and related proteins	METABOLISM	E	Amino acid transport and metabolism
IFM89_028657	At3g14740	7.41e-117	KOG0955	PHD finger protein BR140/LIN-49	POORLY CHARACTERIZED	R	General function prediction only
IFM89_014790	At2g27040	3.78e-36	KOG1041	Translation initiation factor 2C (eIF-2C) and related proteins	INFORMATION STORAGE AND PROCESSING	J	Translation, ribosomal structure and biogenesis
IFM89_009836	At1g71960	2.39e-253	KOG0061	Transporter, ABC superfamily (Breast cancer resistance protein)	METABOLISM	Q	Secondary metabolites biosynthesis, transport and catabolism
IFM89_039035	At2g45330	8.9e-113	KOG2278	RNA:NAD 2'-phosphotransferase TPT1	INFORMATION STORAGE AND PROCESSING	J	Translation, ribosomal structure and biogenesis
IFM89_030792	At1g67320_1	1.32e-79	KOG1995	Conserved Zn-finger protein	POORLY CHARACTERIZED	R	General function prediction only
IFM89_026940	At3g11830	3.96e-49	KOG0361	Chaperonin complex component, TCP-1 eta subunit (CCT7)	CELLULAR PROCESSES AND SIGNALING	O	Posttranslational modification, protein turnover, chaperones
IFM89_036902	At5g61780	0	KOG2039	Transcriptional coactivator p100	INFORMATION STORAGE AND PROCESSING	K	Transcription
IFM89_002829	At2g23450	4.17e-220	KOG1187	Serine/threonine protein kinase	CELLULAR PROCESSES AND SIGNALING	T	Signal transduction mechanisms
IFM89_039423	At4g11260_2	1.21e-88	KOG1309	Suppressor of G2 allele of skp1	CELLULAR PROCESSES AND SIGNALING	T	Signal transduction mechanisms
IFM89_015213	Hs4502295	2.41e-262	KOG1350	F0F1-type ATP synthase, beta subunit	METABOLISM	C	Energy production and conversion
IFM89_028287	At3g52600	3.33e-249	KOG0228	Beta-fructofuranosidase (invertase)	METABOLISM	G	Carbohydrate transport and metabolism
IFM89_015168	At5g48370	9.36e-211	KOG2763	Acyl-CoA thioesterase	METABOLISM	I	Lipid transport and metabolism
IFM89_010986	At4g36810	2.2e-161	KOG0776	Geranylgeranyl pyrophosphate synthase/Polyprenyl synthetase	METABOLISM	H	Coenzyme transport and metabolism
IFM89_015985	At5g46290	8.72e-248	KOG1394	3-oxoacyl-(acyl-carrier-protein) synthase (I and II)	METABOLISM	I	Lipid transport and metabolism
novel.8178	At2g05990	6.51e-17	KOG0725	Reductases with broad range of substrate specificities	POORLY CHARACTERIZED	R	General function prediction only
IFM89_020942	Hs15011928	1.48e-27	KOG0594	Protein kinase PCTAIRE and related kinases	POORLY CHARACTERIZED	R	General function prediction only
novel.6376	At5g58290	3.57e-10	KOG0727	26S proteasome regulatory complex, ATPase RPT3	CELLULAR PROCESSES AND SIGNALING	O	Posttranslational modification, protein turnover, chaperones
IFM89_021190	At2g37770	3.49e-57	KOG1577	Aldo/keto reductase family proteins	POORLY CHARACTERIZED	R	General function prediction only
IFM89_004142	At5g22250	5.96e-126	KOG0304	mRNA deadenylase subunit	INFORMATION STORAGE AND PROCESSING	A	RNA processing and modification
IFM89_012423	At1g07660	2.32e-67	KOG3467	Histone H4	INFORMATION STORAGE AND PROCESSING	B	Chromatin structure and dynamics
IFM89_008180	At3g09270	1.28e-72	KOG0406	Glutathione S-transferase	CELLULAR PROCESSES AND SIGNALING	O	Posttranslational modification, protein turnover, chaperones
IFM89_008429	At1g60900	5.05e-12	KOG0120	Splicing factor U2AF, large subunit (RRM superfamily)	INFORMATION STORAGE AND PROCESSING	A	RNA processing and modification
IFM89_013949	At5g15920	0	KOG0979	Structural maintenance of chromosome protein SMC5/Spr18, SMC superfamily	INFORMATION STORAGE AND PROCESSING	B	Chromatin structure and dynamics
novel.2683	At3g14470	2.8e-88	KOG4658	Apoptotic ATPase	CELLULAR PROCESSES AND SIGNALING	T	Signal transduction mechanisms
IFM89_007626	At4g25050	3.44e-35	KOG1748	Acyl carrier protein/NADH-ubiquinone oxidoreductase, NDUFAB1/SDAP subunit	METABOLISM	C	Energy production and conversion
novel.7211	At4g16910	1.14e-22	KOG0017	FOG: Transposon-encoded proteins with TYA, reverse transcriptase, integrase domains in various combinations	POORLY CHARACTERIZED	R	General function prediction only
IFM89_027201	At3g11130	3.86e-21	KOG0985	Vesicle coat protein clathrin, heavy chain	CELLULAR PROCESSES AND SIGNALING	U	Intracellular trafficking, secretion, and vesicular transport
IFM89_000992	At3g06190	1.07e-142	KOG1987	Speckle-type POZ protein SPOP and related proteins with TRAF, MATH and BTB/POZ domains	CELLULAR PROCESSES AND SIGNALING	D	Cell cycle control, cell division, chromosome partitioning
IFM89_038086	At1g59740	2.15e-128	KOG1237	H+/oligopeptide symporter	METABOLISM	E	Amino acid transport and metabolism
IFM89_020871	At1g23150	3.75e-39	KOG4197	FOG: PPR repeat	POORLY CHARACTERIZED	R	General function prediction only
IFM89_019482	At2g42800	3.28e-52	KOG0619	FOG: Leucine rich repeat	POORLY CHARACTERIZED	R	General function prediction only
IFM89_039755	At3g53170	5.14e-22	KOG4197	FOG: PPR repeat	POORLY CHARACTERIZED	R	General function prediction only
IFM89_018252	At2g05710	0	KOG0452	RNA-binding translational regulator IRP (aconitase superfamily)	INFORMATION STORAGE AND PROCESSING	A	RNA processing and modification
IFM89_029886	At1g50940	1.8e-44	KOG3954	Electron transfer flavoprotein, alpha subunit	METABOLISM	C	Energy production and conversion
IFM89_027609	At4g38460	5.71e-100	KOG0776	Geranylgeranyl pyrophosphate synthase/Polyprenyl synthetase	METABOLISM	H	Coenzyme transport and metabolism
IFM89_029029	At1g12840	3.48e-188	KOG2909	Vacuolar H+-ATPase V1 sector, subunit C	METABOLISM	C	Energy production and conversion
IFM89_003960	At2g38280	0	KOG1096	Adenosine monophosphate deaminase	METABOLISM	F	Nucleotide transport and metabolism
novel.7021	At4g16020	4.21e-38	KOG0017	FOG: Transposon-encoded proteins with TYA, reverse transcriptase, integrase domains in various combinations	POORLY CHARACTERIZED	R	General function prediction only
IFM89_017664	At4g05420	0	KOG1897	Damage-specific DNA binding complex, subunit DDB1	INFORMATION STORAGE AND PROCESSING	L	Replication, recombination and repair
novel.1976	At4g32050	3.07e-06	KOG2611	Neurochondrin/leucine-rich protein (Neurochondrin)	POORLY CHARACTERIZED	S	Function unknown
IFM89_037177	At1g04880_1	1.05e-51	KOG2744	DNA-binding proteins Bright/BRCAA1/RBP1 and related proteins containing BRIGHT domain	INFORMATION STORAGE AND PROCESSING	K	Transcription
IFM89_031742	At5g44200	2.65e-100	KOG0121	Nuclear cap-binding protein complex, subunit CBP20 (RRM superfamily)	INFORMATION STORAGE AND PROCESSING	A	RNA processing and modification
IFM89_033380	At2g27940	7.61e-34	KOG0800	FOG: Predicted E3 ubiquitin ligase	CELLULAR PROCESSES AND SIGNALING	O	Posttranslational modification, protein turnover, chaperones
IFM89_024983	At1g04780	1.61e-198	KOG0522	Ankyrin repeat protein	POORLY CHARACTERIZED	R	General function prediction only
IFM89_004502	At1g33110	4.13e-223	KOG1347	Uncharacterized membrane protein, predicted efflux pump	POORLY CHARACTERIZED	R	General function prediction only
IFM89_020625	At1g12570	1.95e-248	KOG1238	Glucose dehydrogenase/choline dehydrogenase/mandelonitrile lyase (GMC oxidoreductase family)	POORLY CHARACTERIZED	R	General function prediction only
IFM89_013402	At5g05320	9.94e-96	KOG2614	Kynurenine 3-monooxygenase and related flavoprotein monooxygenases	METABOLISM	C	Energy production and conversion
IFM89_012801	At3g54390	4.53e-89	KOG4282	Transcription factor GT-2 and related proteins, contains trihelix DNA-binding/SANT domain	INFORMATION STORAGE AND PROCESSING	K	Transcription
IFM89_031254	At5g14040	3.18e-113	KOG0767	Mitochondrial phosphate carrier protein	METABOLISM	C	Energy production and conversion
IFM89_032728	At3g55270	6.64e-204	KOG1716	Dual specificity phosphatase	CELLULAR PROCESSES AND SIGNALING	V	Defense mechanisms
IFM89_021813	At5g18280	9.29e-206	KOG1385	Nucleoside phosphatase	METABOLISM	F	Nucleotide transport and metabolism
IFM89_028026	At2g38080	1.66e-306	KOG1263	Multicopper oxidases	METABOLISM	Q	Secondary metabolites biosynthesis, transport and catabolism
IFM89_002927	At5g41060	4.43e-114	KOG1311	DHHC-type Zn-finger proteins	POORLY CHARACTERIZED	R	General function prediction only
IFM89_034648	At4g33650	0	KOG0446	Vacuolar sorting protein VPS1, dynamin, and related proteins	CELLULAR PROCESSES AND SIGNALING	U	Intracellular trafficking, secretion, and vesicular transport
IFM89_028491	At1g64600	2.35e-125	KOG2539	Mitochondrial/chloroplast ribosome small subunit component	INFORMATION STORAGE AND PROCESSING	J	Translation, ribosomal structure and biogenesis
IFM89_001148	At4g38640	2.58e-195	KOG1362	Choline transporter-like protein	METABOLISM	I	Lipid transport and metabolism
IFM89_016035	7303295	5.61e-82	KOG2178	Predicted sugar kinase	METABOLISM	G	Carbohydrate transport and metabolism
IFM89_018022	At1g76680	3.43e-227	KOG0134	NADH:flavin oxidoreductase/12-oxophytodienoate reductase	METABOLISM	C	Energy production and conversion
IFM89_001196	At1g31970	5.3e-240	KOG0331	ATP-dependent RNA helicase	INFORMATION STORAGE AND PROCESSING	A	RNA processing and modification
IFM89_001465	At4g18550	1.6e-175	KOG4569	Predicted lipase	METABOLISM	I	Lipid transport and metabolism
IFM89_027881	At3g45850	0	KOG0243	Kinesin-like protein	CELLULAR PROCESSES AND SIGNALING	Z	Cytoskeleton
IFM89_035544	At5g17050	3.69e-160	KOG1192	UDP-glucuronosyl and UDP-glucosyl transferase	METABOLISM	G	Carbohydrate transport and metabolism
IFM89_011843	At5g61170	1.07e-78	KOG3411	40S ribosomal protein S19	INFORMATION STORAGE AND PROCESSING	J	Translation, ribosomal structure and biogenesis
IFM89_026429	At5g24270	3.74e-20	KOG0034	Ca2+/calmodulin-dependent protein phosphatase (calcineurin subunit B), EF-Hand superfamily protein	CELLULAR PROCESSES AND SIGNALING	T	Signal transduction mechanisms
IFM89_033960	At4g38050	9.19e-148	KOG1292	Xanthine/uracil transporters	METABOLISM	F	Nucleotide transport and metabolism
IFM89_020477	At2g02800	4.62e-87	KOG1187	Serine/threonine protein kinase	CELLULAR PROCESSES AND SIGNALING	T	Signal transduction mechanisms
IFM89_010549	At5g47080	7.33e-110	KOG3092	Casein kinase II, beta subunit	CELLULAR PROCESSES AND SIGNALING	T	Signal transduction mechanisms
IFM89_000799	At3g01350	2.53e-172	KOG1237	H+/oligopeptide symporter	METABOLISM	E	Amino acid transport and metabolism
IFM89_026965	At3g14460	9.83e-32	KOG4658	Apoptotic ATPase	CELLULAR PROCESSES AND SIGNALING	T	Signal transduction mechanisms
IFM89_037355	At2g38670	2.12e-188	KOG2803	Choline phosphate cytidylyltransferase/Predicted CDP-ethanolamine synthase	METABOLISM	I	Lipid transport and metabolism
IFM89_002738	At2g40550	3.49e-221	KOG2545	Conserved membrane protein	POORLY CHARACTERIZED	S	Function unknown
IFM89_025851	At1g48520	1.32e-277	KOG2438	Glutamyl-tRNA amidotransferase subunit B	INFORMATION STORAGE AND PROCESSING	J	Translation, ribosomal structure and biogenesis
IFM89_018115	At3g50950	2.92e-247	KOG4658	Apoptotic ATPase	CELLULAR PROCESSES AND SIGNALING	T	Signal transduction mechanisms
IFM89_003856	At4g37880	3.29e-141	KOG2817	Predicted E3 ubiquitin ligase	CELLULAR PROCESSES AND SIGNALING	O	Posttranslational modification, protein turnover, chaperones
IFM89_031482	At5g58860	1.21e-293	KOG0157	Cytochrome P450 CYP4/CYP19/CYP26 subfamilies	METABOLISM	Q	Secondary metabolites biosynthesis, transport and catabolism
IFM89_011863	At5g25900	8.47e-64	KOG0156	Cytochrome P450 CYP2 subfamily	METABOLISM	Q	Secondary metabolites biosynthesis, transport and catabolism
IFM89_034065	At1g27940	0	KOG0055	Multidrug/pheromone exporter, ABC superfamily	METABOLISM	Q	Secondary metabolites biosynthesis, transport and catabolism
IFM89_037522	At3g05990	7.77e-194	KOG0619	FOG: Leucine rich repeat	POORLY CHARACTERIZED	R	General function prediction only
novel.3107	At2g38280	9.93e-16	KOG1096	Adenosine monophosphate deaminase	METABOLISM	F	Nucleotide transport and metabolism
IFM89_028643	At1g03370_2	0	KOG1032	Uncharacterized conserved protein, contains GRAM domain	POORLY CHARACTERIZED	S	Function unknown
IFM89_038777	At5g33320	7.71e-107	KOG1441	Glucose-6-phosphate/phosphate and phosphoenolpyruvate/phosphate antiporter	METABOLISM	G	Carbohydrate transport and metabolism
IFM89_014042	At1g53300_1	1.22e-178	KOG1124	FOG: TPR repeat	POORLY CHARACTERIZED	R	General function prediction only
IFM89_016688	At5g67480	6.05e-150	KOG1778	CREB binding protein/P300 and related TAZ Zn-finger proteins	INFORMATION STORAGE AND PROCESSING	K	Transcription
IFM89_030917	At4g33360	5.92e-168	KOG1502	Flavonol reductase/cinnamoyl-CoA reductase	CELLULAR PROCESSES AND SIGNALING	V	Defense mechanisms
IFM89_028854	At5g04290	8.84e-11	KOG1999	RNA polymerase II transcription elongation factor DSIF/SUPT5H/SPT5	INFORMATION STORAGE AND PROCESSING	K	Transcription
IFM89_007647	At5g50920	0	KOG1051	Chaperone HSP104 and related ATP-dependent Clp proteases	CELLULAR PROCESSES AND SIGNALING	O	Posttranslational modification, protein turnover, chaperones
IFM89_008577	At2g23520	3.72e-107	KOG2142	Molybdenum cofactor sulfurase	METABOLISM	H	Coenzyme transport and metabolism
IFM89_029148	At1g17890	1.53e-74	KOG1431	GDP-L-fucose synthetase	METABOLISM	G	Carbohydrate transport and metabolism
IFM89_024078	At4g17370	3.71e-190	KOG2741	Dimeric dihydrodiol dehydrogenase	METABOLISM	G	Carbohydrate transport and metabolism
IFM89_036405	At5g54160	1.33e-105	KOG3178	Hydroxyindole-O-methyltransferase and related SAM-dependent methyltransferases	POORLY CHARACTERIZED	R	General function prediction only
IFM89_017814	At3g55410	1.33e-54	KOG0450	2-oxoglutarate dehydrogenase, E1 subunit	METABOLISM	G	Carbohydrate transport and metabolism
IFM89_010707	At4g39170	1.68e-243	KOG1471	Phosphatidylinositol transfer protein SEC14 and related proteins	METABOLISM	I	Lipid transport and metabolism
IFM89_001503	At3g53930	6.61e-231	KOG0595	Serine/threonine-protein kinase involved in autophagy	CELLULAR PROCESSES AND SIGNALING	O	Posttranslational modification, protein turnover, chaperones
IFM89_031256	At5g14040	5.33e-73	KOG0767	Mitochondrial phosphate carrier protein	METABOLISM	C	Energy production and conversion
IFM89_009805	At3g14660	1.63e-210	KOG0157	Cytochrome P450 CYP4/CYP19/CYP26 subfamilies	METABOLISM	Q	Secondary metabolites biosynthesis, transport and catabolism
IFM89_030919	At5g44250	5.47e-145	KOG2521	Uncharacterized conserved protein	POORLY CHARACTERIZED	S	Function unknown
IFM89_020441	At3g06060	4.55e-131	KOG1210	Predicted 3-ketosphinganine reductase	METABOLISM	Q	Secondary metabolites biosynthesis, transport and catabolism
IFM89_009757	At1g17840	1.3e-197	KOG0061	Transporter, ABC superfamily (Breast cancer resistance protein)	METABOLISM	Q	Secondary metabolites biosynthesis, transport and catabolism
IFM89_005553	At4g36760	0	KOG2413	Xaa-Pro aminopeptidase	METABOLISM	E	Amino acid transport and metabolism
IFM89_003374	At3g30390	5.3e-207	KOG1305	Amino acid transporter protein	METABOLISM	E	Amino acid transport and metabolism
IFM89_024656	At3g61460	1.08e-43	KOG0800	FOG: Predicted E3 ubiquitin ligase	CELLULAR PROCESSES AND SIGNALING	O	Posttranslational modification, protein turnover, chaperones
IFM89_021283	At1g06800	8.86e-223	KOG4569	Predicted lipase	METABOLISM	I	Lipid transport and metabolism
IFM89_028650	At3g55260	9.39e-189	KOG2499	Beta-N-acetylhexosaminidase	METABOLISM	G	Carbohydrate transport and metabolism
IFM89_032590	At3g63470	5.29e-151	KOG1282	Serine carboxypeptidases (lysosomal cathepsin A)	CELLULAR PROCESSES AND SIGNALING	O	Posttranslational modification, protein turnover, chaperones
IFM89_024277	At2g17220	3.7e-159	KOG1187	Serine/threonine protein kinase	CELLULAR PROCESSES AND SIGNALING	T	Signal transduction mechanisms
IFM89_038621	At3g48530	7.62e-181	KOG1764	5'-AMP-activated protein kinase, gamma subunit	METABOLISM	C	Energy production and conversion
IFM89_034006	At4g24190	0	KOG0020	Endoplasmic reticulum glucose-regulated protein (GRP94/endoplasmin), HSP90 family	CELLULAR PROCESSES AND SIGNALING	O	Posttranslational modification, protein turnover, chaperones
IFM89_012865	At2g30110	0	KOG2012	Ubiquitin activating enzyme UBA1	CELLULAR PROCESSES AND SIGNALING	O	Posttranslational modification, protein turnover, chaperones
IFM89_011855	At3g54630	3.39e-114	KOG0995	Centromere-associated protein HEC1	CELLULAR PROCESSES AND SIGNALING	D	Cell cycle control, cell division, chromosome partitioning
IFM89_013340	At2g29540	2.96e-28	KOG3438	DNA-directed RNA polymerase, subunit L	INFORMATION STORAGE AND PROCESSING	K	Transcription
IFM89_022082	At1g15950	1.87e-189	KOG1502	Flavonol reductase/cinnamoyl-CoA reductase	CELLULAR PROCESSES AND SIGNALING	V	Defense mechanisms
novel.5260	At1g62460	1.41e-97	KOG0017	FOG: Transposon-encoded proteins with TYA, reverse transcriptase, integrase domains in various combinations	POORLY CHARACTERIZED	R	General function prediction only
IFM89_030081	At4g15920	1.72e-46	KOG1623	Multitransmembrane protein	POORLY CHARACTERIZED	R	General function prediction only
IFM89_031625	At5g01220	3.73e-204	KOG1111	N-acetylglucosaminyltransferase complex, subunit PIG-A/SPT14, required for phosphatidylinositol biosynthesis/Sulfolipid synthase	CELLULAR PROCESSES AND SIGNALING	M	Cell wall/membrane/envelope biogenesis
IFM89_032804	At1g27880	1.67e-222	KOG0351	ATP-dependent DNA helicase	INFORMATION STORAGE AND PROCESSING	L	Replication, recombination and repair
IFM89_019248	At1g13190	3.74e-109	KOG0118	FOG: RRM domain	POORLY CHARACTERIZED	R	General function prediction only
IFM89_000289	At5g63400	2.16e-141	KOG3078	Adenylate kinase	METABOLISM	F	Nucleotide transport and metabolism
IFM89_002589	At5g19290	5.8e-144	KOG1455	Lysophospholipase	METABOLISM	I	Lipid transport and metabolism
IFM89_012109	At2g33370	1.3e-95	KOG0901	60S ribosomal protein L14/L17/L23	INFORMATION STORAGE AND PROCESSING	J	Translation, ribosomal structure and biogenesis
IFM89_010572	At1g56310	3.01e-145	KOG2207	Predicted 3'-5' exonuclease	INFORMATION STORAGE AND PROCESSING	L	Replication, recombination and repair
IFM89_007597	At4g18810	1.55e-114	KOG1203	Predicted dehydrogenase	METABOLISM	G	Carbohydrate transport and metabolism
IFM89_020034	At2g23140	2.72e-15	KOG0167	FOG: Armadillo/beta-catenin-like repeats	POORLY CHARACTERIZED	S	Function unknown
IFM89_031820	At1g47530	1.14e-168	KOG1347	Uncharacterized membrane protein, predicted efflux pump	POORLY CHARACTERIZED	R	General function prediction only
IFM89_030584	At4g16770	1.63e-73	KOG0143	Iron/ascorbate family oxidoreductases	METABOLISM	Q	Secondary metabolites biosynthesis, transport and catabolism
novel.7426	At1g75660	4.81e-12	KOG2044	5'-3' exonuclease HKE1/RAT1	INFORMATION STORAGE AND PROCESSING	L	Replication, recombination and repair
IFM89_025722	At1g33230	1.06e-37	KOG4758	Predicted membrane protein	POORLY CHARACTERIZED	R	General function prediction only
IFM89_028101	At5g54060	5.02e-113	KOG1192	UDP-glucuronosyl and UDP-glucosyl transferase	METABOLISM	G	Carbohydrate transport and metabolism
IFM89_009485	At5g54190	4.51e-221	KOG1208	Dehydrogenases with different specificities (related to short-chain alcohol dehydrogenases)	METABOLISM	Q	Secondary metabolites biosynthesis, transport and catabolism
IFM89_031223	At3g26810	2.26e-302	KOG1947	Leucine rich repeat proteins, some proteins contain F-box	POORLY CHARACTERIZED	R	General function prediction only
IFM89_029808	At5g41760	2.29e-101	KOG2234	Predicted UDP-galactose transporter	METABOLISM	G	Carbohydrate transport and metabolism
novel.7627	At1g24640	5.71e-08	KOG1075	FOG: Reverse transcriptase	POORLY CHARACTERIZED	R	General function prediction only
IFM89_022883	At2g35800	0	KOG0768	Mitochondrial carrier protein PET8	METABOLISM	C	Energy production and conversion
IFM89_016825	At4g18910	3.9e-60	KOG0223	Aquaporin (major intrinsic protein family)	METABOLISM	G	Carbohydrate transport and metabolism
novel.6327	At1g18270_1	2.55e-16	KOG0409	Predicted dehydrogenase	POORLY CHARACTERIZED	R	General function prediction only
novel.6687	At1g48310	1.06e-21	KOG1000	Chromatin remodeling protein HARP/SMARCAL1, DEAD-box superfamily	INFORMATION STORAGE AND PROCESSING	B	Chromatin structure and dynamics
novel.7359	At1g24706	4.76e-23	KOG1874	KEKE-like motif-containing transcription regulator (Rlr1)/suppressor of sin4	INFORMATION STORAGE AND PROCESSING	K	Transcription
IFM89_034888	At1g74120	9.71e-80	KOG1267	Mitochondrial transcription termination factor, mTERF	INFORMATION STORAGE AND PROCESSING	K	Transcription
IFM89_035402	At4g25340	2.22e-33	KOG0552	FKBP-type peptidyl-prolyl cis-trans isomerase	CELLULAR PROCESSES AND SIGNALING	O	Posttranslational modification, protein turnover, chaperones
IFM89_037838	At4g10390	1.52e-90	KOG1187	Serine/threonine protein kinase	CELLULAR PROCESSES AND SIGNALING	T	Signal transduction mechanisms
IFM89_007860	At1g52820	1.22e-92	KOG0143	Iron/ascorbate family oxidoreductases	METABOLISM	Q	Secondary metabolites biosynthesis, transport and catabolism
novel.8252	At2g15540	1.24e-18	KOG1075	FOG: Reverse transcriptase	POORLY CHARACTERIZED	R	General function prediction only
IFM89_009130	At3g63070	2.89e-126	KOG1904	Transcription coactivator	INFORMATION STORAGE AND PROCESSING	K	Transcription
IFM89_000860	At1g73960	0	KOG1932	TATA binding protein associated factor	INFORMATION STORAGE AND PROCESSING	K	Transcription
IFM89_024370	At1g48640_1	1.77e-107	KOG4444	Peroxisomal assembly protein PEX3	CELLULAR PROCESSES AND SIGNALING	M	Cell wall/membrane/envelope biogenesis
IFM89_006713	At5g60070	2.67e-115	KOG0504	FOG: Ankyrin repeat	POORLY CHARACTERIZED	R	General function prediction only
IFM89_006896	At3g47160	2.85e-120	KOG1039	Predicted E3 ubiquitin ligase	CELLULAR PROCESSES AND SIGNALING	O	Posttranslational modification, protein turnover, chaperones
IFM89_017855	At5g64440	2.35e-246	KOG1211	Amidases	INFORMATION STORAGE AND PROCESSING	J	Translation, ribosomal structure and biogenesis
IFM89_006049	At3g04580	3.71e-297	KOG0519	Sensory transduction histidine kinase	CELLULAR PROCESSES AND SIGNALING	T	Signal transduction mechanisms
IFM89_033486	At3g06670	9.72e-296	KOG2175	Protein predicted to be involved in carbohydrate metabolism	METABOLISM	G	Carbohydrate transport and metabolism
IFM89_035571	At3g06350	1.17e-249	KOG0692	Pentafunctional AROM protein	METABOLISM	E	Amino acid transport and metabolism
IFM89_006281	At1g07180	1.72e-237	KOG2495	NADH-dehydrogenase (ubiquinone)	METABOLISM	C	Energy production and conversion
IFM89_004861	At1g52820	3.11e-110	KOG0143	Iron/ascorbate family oxidoreductases	METABOLISM	Q	Secondary metabolites biosynthesis, transport and catabolism
IFM89_033725	At1g09140	1.03e-100	KOG0105	Alternative splicing factor ASF/SF2 (RRM superfamily)	INFORMATION STORAGE AND PROCESSING	A	RNA processing and modification
IFM89_019460	Hs18595481	6.63e-37	KOG2914	Predicted haloacid-halidohydrolase and related hydrolases	POORLY CHARACTERIZED	R	General function prediction only
IFM89_023995	At4g04610_1	9.29e-175	KOG0189	Phosphoadenosine phosphosulfate reductase	METABOLISM	E	Amino acid transport and metabolism
IFM89_002075	At2g27830	8.33e-50	KOG4197	FOG: PPR repeat	POORLY CHARACTERIZED	R	General function prediction only
IFM89_020928	At5g02270	4.74e-192	KOG2355	Predicted ABC-type transport, ATPase component/CCR4 associated factor	POORLY CHARACTERIZED	R	General function prediction only
IFM89_021545	At1g52540	3.03e-53	KOG1187	Serine/threonine protein kinase	CELLULAR PROCESSES AND SIGNALING	T	Signal transduction mechanisms
IFM89_011911	At4g31940	1.28e-194	KOG0156	Cytochrome P450 CYP2 subfamily	METABOLISM	Q	Secondary metabolites biosynthesis, transport and catabolism
IFM89_020512	At5g48030	5.6e-149	KOG0715	Molecular chaperone (DnaJ superfamily)	CELLULAR PROCESSES AND SIGNALING	O	Posttranslational modification, protein turnover, chaperones
IFM89_021809	At1g47670	1.46e-162	KOG1303	Amino acid transporters	METABOLISM	E	Amino acid transport and metabolism
IFM89_036243	At3g54400	1.63e-148	KOG1339	Aspartyl protease	CELLULAR PROCESSES AND SIGNALING	O	Posttranslational modification, protein turnover, chaperones
IFM89_011848	At2g20420	6.38e-43	KOG2799	Succinyl-CoA synthetase, beta subunit	METABOLISM	C	Energy production and conversion
IFM89_020631	At4g11820	1.24e-224	KOG1393	Hydroxymethylglutaryl-CoA synthase	METABOLISM	I	Lipid transport and metabolism
IFM89_038117	At1g55320	8.8e-284	KOG1175	Acyl-CoA synthetase	METABOLISM	I	Lipid transport and metabolism
IFM89_014889	At2g35940	7.26e-55	KOG0773	Transcription factor MEIS1 and related HOX domain proteins	INFORMATION STORAGE AND PROCESSING	K	Transcription
novel.6716	At3g05900	3.9e-06	KOG1181	FOG: Low-complexity	POORLY CHARACTERIZED	S	Function unknown
IFM89_002595	At5g60670	3.23e-104	KOG0886	40S ribosomal protein S2	INFORMATION STORAGE AND PROCESSING	J	Translation, ribosomal structure and biogenesis
IFM89_015680	At4g23800	1.87e-107	KOG0381	HMG box-containing protein	POORLY CHARACTERIZED	R	General function prediction only
IFM89_039739	At2g36060	5.5e-78	KOG0896	Ubiquitin-conjugating enzyme E2	CELLULAR PROCESSES AND SIGNALING	O	Posttranslational modification, protein turnover, chaperones
novel.6770	At5g41480	1.97e-11	KOG2525	Folylpolyglutamate synthase	METABOLISM	H	Coenzyme transport and metabolism
IFM89_035714	At1g60500	1.68e-63	KOG0446	Vacuolar sorting protein VPS1, dynamin, and related proteins	CELLULAR PROCESSES AND SIGNALING	U	Intracellular trafficking, secretion, and vesicular transport
IFM89_001118	At1g75510	5.13e-55	KOG2905	Transcription initiation factor IIF, small subunit (RAP30)	INFORMATION STORAGE AND PROCESSING	K	Transcription
IFM89_000683	At2g02960	1.49e-43	KOG1609	Protein involved in mRNA turnover and stability	INFORMATION STORAGE AND PROCESSING	A	RNA processing and modification
IFM89_019022	At4g22010	0	KOG1263	Multicopper oxidases	METABOLISM	Q	Secondary metabolites biosynthesis, transport and catabolism
IFM89_032841	At1g16720	1.13e-296	KOG1203	Predicted dehydrogenase	METABOLISM	G	Carbohydrate transport and metabolism
IFM89_026277	At1g10200	7.67e-98	KOG1700	Regulatory protein MLP and related LIM proteins	CELLULAR PROCESSES AND SIGNALING	T	Signal transduction mechanisms
novel.2655	At4g33040	3.77e-30	KOG1752	Glutaredoxin and related proteins	CELLULAR PROCESSES AND SIGNALING	O	Posttranslational modification, protein turnover, chaperones
IFM89_016225	At3g18830	6.78e-224	KOG0254	Predicted transporter (major facilitator superfamily)	POORLY CHARACTERIZED	R	General function prediction only
IFM89_029878	At4g11240	5.73e-205	KOG0374	Serine/threonine specific protein phosphatase PP1, catalytic subunit	CELLULAR PROCESSES AND SIGNALING	T	Signal transduction mechanisms
novel.4595	At2g36060	5.28e-14	KOG0896	Ubiquitin-conjugating enzyme E2	CELLULAR PROCESSES AND SIGNALING	O	Posttranslational modification, protein turnover, chaperones
IFM89_036015	At3g01470	3.52e-72	KOG0483	Transcription factor HEX, contains HOX and HALZ domains	INFORMATION STORAGE AND PROCESSING	K	Transcription
IFM89_011232	At4g07950	1.09e-28	KOG2906	RNA polymerase III subunit C11	INFORMATION STORAGE AND PROCESSING	K	Transcription
IFM89_027898	At1g07660	2.32e-67	KOG3467	Histone H4	INFORMATION STORAGE AND PROCESSING	B	Chromatin structure and dynamics
IFM89_036911	At5g47910	0	KOG0039	Ferric reductase, NADH/NADPH oxidase and related proteins	METABOLISM	P	Inorganic ion transport and metabolism
IFM89_009799	At2g03200	1.67e-129	KOG1339	Aspartyl protease	CELLULAR PROCESSES AND SIGNALING	O	Posttranslational modification, protein turnover, chaperones
IFM89_031723	At4g00110	4.45e-245	KOG1371	UDP-glucose 4-epimerase/UDP-sulfoquinovose synthase	CELLULAR PROCESSES AND SIGNALING	M	Cell wall/membrane/envelope biogenesis
IFM89_014956	At1g66260	1.07e-58	KOG0533	RRM motif-containing protein	INFORMATION STORAGE AND PROCESSING	A	RNA processing and modification
IFM89_038584	At2g38400	1.17e-241	KOG1404	Alanine-glyoxylate aminotransferase AGT2	METABOLISM	E	Amino acid transport and metabolism
IFM89_008093	At3g02100	5.74e-125	KOG1192	UDP-glucuronosyl and UDP-glucosyl transferase	METABOLISM	G	Carbohydrate transport and metabolism
IFM89_013139	At2g21660	3.92e-46	KOG0118	FOG: RRM domain	POORLY CHARACTERIZED	R	General function prediction only
IFM89_018934	At3g10950	1.22e-56	KOG0402	60S ribosomal protein L37	INFORMATION STORAGE AND PROCESSING	J	Translation, ribosomal structure and biogenesis
IFM89_028245	At3g50000	7.05e-125	KOG0668	Casein kinase II, alpha subunit	CELLULAR PROCESSES AND SIGNALING	T	Signal transduction mechanisms
IFM89_023066	At5g11500	8.39e-92	KOG3272	Predicted coiled-coil protein	POORLY CHARACTERIZED	R	General function prediction only
novel.8015	At3g22230	1.7e-33	KOG3418	60S ribosomal protein L27	INFORMATION STORAGE AND PROCESSING	J	Translation, ribosomal structure and biogenesis
novel.8791	At4g26530	1.91e-138	KOG1557	Fructose-biphosphate aldolase	METABOLISM	G	Carbohydrate transport and metabolism
IFM89_002445	At3g63460	1.14e-39	KOG0307	Vesicle coat complex COPII, subunit SEC31	CELLULAR PROCESSES AND SIGNALING	U	Intracellular trafficking, secretion, and vesicular transport
IFM89_029891	At1g74630	6.45e-43	KOG4197	FOG: PPR repeat	POORLY CHARACTERIZED	R	General function prediction only
IFM89_031824	At4g35410	3.93e-64	KOG0934	Clathrin adaptor complex, small subunit	CELLULAR PROCESSES AND SIGNALING	U	Intracellular trafficking, secretion, and vesicular transport
IFM89_038383	At2g45510	1.03e-150	KOG0157	Cytochrome P450 CYP4/CYP19/CYP26 subfamilies	METABOLISM	Q	Secondary metabolites biosynthesis, transport and catabolism
IFM89_039184	AtMi039	2.3e-17	KOG2870	NADH:ubiquinone oxidoreductase, NDUFS2/49 kDa subunit	METABOLISM	C	Energy production and conversion
IFM89_039083	At4g16130	0	KOG0631	Galactokinase	METABOLISM	G	Carbohydrate transport and metabolism
IFM89_005444	At1g27150	1.3e-142	KOG2610	Uncharacterized conserved protein	POORLY CHARACTERIZED	S	Function unknown
novel.2930	At3g53870	1.39e-06	KOG3181	40S ribosomal protein S3	INFORMATION STORAGE AND PROCESSING	J	Translation, ribosomal structure and biogenesis
IFM89_002066	At2g36530	2.37e-287	KOG2670	Enolase	METABOLISM	G	Carbohydrate transport and metabolism
IFM89_008513	At2g28250	5.55e-174	KOG1187	Serine/threonine protein kinase	CELLULAR PROCESSES AND SIGNALING	T	Signal transduction mechanisms
IFM89_000889	At1g25570	1.93e-236	KOG0619	FOG: Leucine rich repeat	POORLY CHARACTERIZED	R	General function prediction only
IFM89_039413	At5g52660	1.39e-105	KOG0724	Zuotin and related molecular chaperones (DnaJ superfamily), contains DNA-binding domains	CELLULAR PROCESSES AND SIGNALING	O	Posttranslational modification, protein turnover, chaperones
IFM89_011622	At1g70510	2.6e-114	KOG0773	Transcription factor MEIS1 and related HOX domain proteins	INFORMATION STORAGE AND PROCESSING	K	Transcription
novel.5790	At3g32110	4.51e-12	KOG1075	FOG: Reverse transcriptase	POORLY CHARACTERIZED	R	General function prediction only
IFM89_007357	At3g44050	5.58e-296	KOG4280	Kinesin-like protein	CELLULAR PROCESSES AND SIGNALING	Z	Cytoskeleton
IFM89_020405	At3g07680	5.72e-110	KOG1692	Putative cargo transport protein EMP24 (p24 protein family)	CELLULAR PROCESSES AND SIGNALING	U	Intracellular trafficking, secretion, and vesicular transport
IFM89_031714	At2g45290	0	KOG0523	Transketolase	METABOLISM	G	Carbohydrate transport and metabolism
novel.1889	At3g60080	6.47e-12	KOG0800	FOG: Predicted E3 ubiquitin ligase	CELLULAR PROCESSES AND SIGNALING	O	Posttranslational modification, protein turnover, chaperones
IFM89_027583	At5g42210	3.73e-54	KOG2816	Predicted transporter ADD1 (major facilitator superfamily)	POORLY CHARACTERIZED	R	General function prediction only
IFM89_029460	At4g11420	0	KOG2072	Translation initiation factor 3, subunit a (eIF-3a)	INFORMATION STORAGE AND PROCESSING	J	Translation, ribosomal structure and biogenesis
IFM89_031919	At4g33330	7.97e-172	KOG1950	Glycosyl transferase, family 8 - glycogenin	METABOLISM	G	Carbohydrate transport and metabolism
IFM89_006463	At1g78960	7.82e-183	KOG0497	Oxidosqualene-lanosterol cyclase and related proteins	METABOLISM	I	Lipid transport and metabolism
novel.5063	At1g20390	3.16e-98	KOG0017	FOG: Transposon-encoded proteins with TYA, reverse transcriptase, integrase domains in various combinations	POORLY CHARACTERIZED	R	General function prediction only
IFM89_022345	At1g53570	3.52e-155	KOG0198	MEKK and related serine/threonine protein kinases	CELLULAR PROCESSES AND SIGNALING	T	Signal transduction mechanisms
IFM89_017095	At5g22860	5.93e-179	KOG2183	Prolylcarboxypeptidase (angiotensinase C)	CELLULAR PROCESSES AND SIGNALING	O	Posttranslational modification, protein turnover, chaperones
IFM89_010412	At3g02360	1.53e-77	KOG2653	6-phosphogluconate dehydrogenase	METABOLISM	G	Carbohydrate transport and metabolism
IFM89_010605	At4g02110	6.63e-150	KOG1929	Nucleotide excision repair factor NEF2, RAD4/CUT5 component	INFORMATION STORAGE AND PROCESSING	L	Replication, recombination and repair
novel.3286	At3g59720	2.1e-243	KOG0017	FOG: Transposon-encoded proteins with TYA, reverse transcriptase, integrase domains in various combinations	POORLY CHARACTERIZED	R	General function prediction only
IFM89_012799	At5g07030	1.15e-175	KOG1339	Aspartyl protease	CELLULAR PROCESSES AND SIGNALING	O	Posttranslational modification, protein turnover, chaperones
IFM89_028678	Hs5453958	2.23e-32	KOG0376	Serine-threonine phosphatase 2A, catalytic subunit	POORLY CHARACTERIZED	R	General function prediction only
novel.8789	At5g61240	1.4e-45	KOG0619	FOG: Leucine rich repeat	POORLY CHARACTERIZED	R	General function prediction only
IFM89_020099	At1g07660	2.32e-67	KOG3467	Histone H4	INFORMATION STORAGE AND PROCESSING	B	Chromatin structure and dynamics
novel.8156	At2g33560	4.35e-18	KOG1166	Mitotic checkpoint serine/threonine protein kinase	CELLULAR PROCESSES AND SIGNALING	D	Cell cycle control, cell division, chromosome partitioning
IFM89_016189	At4g01680	3e-82	KOG0048	Transcription factor, Myb superfamily	INFORMATION STORAGE AND PROCESSING	K	Transcription
IFM89_027538	At3g01090	1.49e-211	KOG0583	Serine/threonine protein kinase	CELLULAR PROCESSES AND SIGNALING	T	Signal transduction mechanisms
novel.4077	At3g13750	1.21e-17	KOG0496	Beta-galactosidase	METABOLISM	G	Carbohydrate transport and metabolism
IFM89_036566	At3g24050	5.23e-39	KOG1601	GATA-4/5/6 transcription factors	INFORMATION STORAGE AND PROCESSING	K	Transcription
IFM89_015790	At1g22400	2.4e-172	KOG1192	UDP-glucuronosyl and UDP-glucosyl transferase	METABOLISM	G	Carbohydrate transport and metabolism
IFM89_029938	At2g27810	0	KOG1292	Xanthine/uracil transporters	METABOLISM	F	Nucleotide transport and metabolism
IFM89_018520	At5g52260	5.23e-52	KOG0048	Transcription factor, Myb superfamily	INFORMATION STORAGE AND PROCESSING	K	Transcription
IFM89_011429	At1g69120	2.55e-88	KOG0014	MADS box transcription factor	INFORMATION STORAGE AND PROCESSING	K	Transcription
IFM89_025956	At4g36360	0	KOG0496	Beta-galactosidase	METABOLISM	G	Carbohydrate transport and metabolism
novel.5633	At5g06570	1.13e-103	KOG1515	Arylacetamide deacetylase	CELLULAR PROCESSES AND SIGNALING	V	Defense mechanisms
IFM89_007698	At1g11950	5.71e-209	KOG1356	Putative transcription factor 5qNCA, contains JmjC domain	INFORMATION STORAGE AND PROCESSING	K	Transcription
IFM89_003676	At5g10270	5.65e-181	KOG0600	Cdc2-related protein kinase	CELLULAR PROCESSES AND SIGNALING	D	Cell cycle control, cell division, chromosome partitioning
IFM89_012298	At5g19760	8.18e-181	KOG0759	Mitochondrial oxoglutarate/malate carrier proteins	METABOLISM	C	Energy production and conversion
IFM89_017030	At3g49350	8.66e-184	KOG2197	Ypt/Rab-specific GTPase-activating protein GYP7 and related proteins	CELLULAR PROCESSES AND SIGNALING	T	Signal transduction mechanisms
IFM89_017820	At3g02450	5.24e-85	KOG0731	AAA+-type ATPase containing the peptidase M41 domain	CELLULAR PROCESSES AND SIGNALING	O	Posttranslational modification, protein turnover, chaperones
IFM89_013846	At5g10730	9.54e-120	KOG4288	Predicted oxidoreductase	POORLY CHARACTERIZED	R	General function prediction only
IFM89_038030	CE09229	2.33e-08	KOG2806	Chitinase	METABOLISM	G	Carbohydrate transport and metabolism
IFM89_000514	At3g52250	3.09e-144	KOG1878	Nuclear receptor coregulator SMRT/SMRTER, contains Myb-like domains	INFORMATION STORAGE AND PROCESSING	K	Transcription
IFM89_004715	At5g45160	3.13e-53	KOG2203	GTP-binding protein	POORLY CHARACTERIZED	R	General function prediction only
IFM89_012729	At5g54380	6.39e-279	KOG1187	Serine/threonine protein kinase	CELLULAR PROCESSES AND SIGNALING	T	Signal transduction mechanisms
IFM89_029855	At4g11220	9.12e-100	KOG1792	Reticulon	CELLULAR PROCESSES AND SIGNALING	U	Intracellular trafficking, secretion, and vesicular transport
novel.387	At2g05640	3.16e-09	KOG0987	DNA helicase PIF1/RRM3	CELLULAR PROCESSES AND SIGNALING	D	Cell cycle control, cell division, chromosome partitioning
IFM89_035462	At1g03670	1.94e-60	KOG0504	FOG: Ankyrin repeat	POORLY CHARACTERIZED	R	General function prediction only
IFM89_024654	At5g41460	1.7e-253	KOG2246	Galactosyltransferases	METABOLISM	G	Carbohydrate transport and metabolism
IFM89_017646	At2g34690	3.68e-70	KOG4189	Uncharacterized conserved protein	POORLY CHARACTERIZED	S	Function unknown
IFM89_017986	At3g54700	0	KOG0252	Inorganic phosphate transporter	METABOLISM	P	Inorganic ion transport and metabolism
IFM89_036400	At5g12080	3.62e-236	KOG4629	Predicted mechanosensitive ion channel	CELLULAR PROCESSES AND SIGNALING	M	Cell wall/membrane/envelope biogenesis
IFM89_022296	At2g05810	1.38e-134	KOG0167	FOG: Armadillo/beta-catenin-like repeats	POORLY CHARACTERIZED	S	Function unknown
IFM89_025162	At4g31970	1.6e-193	KOG0156	Cytochrome P450 CYP2 subfamily	METABOLISM	Q	Secondary metabolites biosynthesis, transport and catabolism
IFM89_015293	At3g06510	1.61e-298	KOG0626	Beta-glucosidase, lactase phlorizinhydrolase, and related proteins	METABOLISM	G	Carbohydrate transport and metabolism
IFM89_032791	At2g23910	2.52e-83	KOG1502	Flavonol reductase/cinnamoyl-CoA reductase	CELLULAR PROCESSES AND SIGNALING	V	Defense mechanisms
IFM89_033920	At5g50850	8.19e-217	KOG0524	Pyruvate dehydrogenase E1, beta subunit	METABOLISM	C	Energy production and conversion
IFM89_001111	At2g39770	4.34e-191	KOG1322	GDP-mannose pyrophosphorylase/mannose-1-phosphate guanylyltransferase	CELLULAR PROCESSES AND SIGNALING	M	Cell wall/membrane/envelope biogenesis
IFM89_015248	At3g52990	6.72e-276	KOG2323	Pyruvate kinase	METABOLISM	G	Carbohydrate transport and metabolism
IFM89_004744	At5g60580	1.52e-90	KOG1609	Protein involved in mRNA turnover and stability	INFORMATION STORAGE AND PROCESSING	A	RNA processing and modification
IFM89_019735	At2g28470	1.81e-190	KOG0496	Beta-galactosidase	METABOLISM	G	Carbohydrate transport and metabolism
IFM89_002940	At3g26730	5.62e-187	KOG2164	Predicted E3 ubiquitin ligase	CELLULAR PROCESSES AND SIGNALING	O	Posttranslational modification, protein turnover, chaperones
IFM89_039754	At1g80570	1.37e-115	KOG1947	Leucine rich repeat proteins, some proteins contain F-box	POORLY CHARACTERIZED	R	General function prediction only
IFM89_003146	At1g52820	7.17e-94	KOG0143	Iron/ascorbate family oxidoreductases	METABOLISM	Q	Secondary metabolites biosynthesis, transport and catabolism
IFM89_031651	At1g08620	2.36e-76	KOG1246	DNA-binding protein jumonji/RBP2/SMCY, contains JmjC domain	POORLY CHARACTERIZED	R	General function prediction only
novel.8588	At4g39700	6.5e-63	KOG1603	Copper chaperone	METABOLISM	P	Inorganic ion transport and metabolism
IFM89_031573	At4g02630	1.91e-230	KOG1187	Serine/threonine protein kinase	CELLULAR PROCESSES AND SIGNALING	T	Signal transduction mechanisms
IFM89_032191	At5g62890	0	KOG1292	Xanthine/uracil transporters	METABOLISM	F	Nucleotide transport and metabolism
IFM89_021553	At5g57670	1.33e-147	KOG1187	Serine/threonine protein kinase	CELLULAR PROCESSES AND SIGNALING	T	Signal transduction mechanisms
IFM89_001737	At4g25200	9.46e-30	KOG0710	Molecular chaperone (small heat-shock protein Hsp26/Hsp42)	CELLULAR PROCESSES AND SIGNALING	O	Posttranslational modification, protein turnover, chaperones
IFM89_021682	At1g60960	2.65e-154	KOG1558	Fe2+/Zn2+ regulated transporter	METABOLISM	P	Inorganic ion transport and metabolism
IFM89_004406	At1g66930	5.26e-55	KOG1187	Serine/threonine protein kinase	CELLULAR PROCESSES AND SIGNALING	T	Signal transduction mechanisms
IFM89_028535	At3g14470	8.59e-87	KOG4658	Apoptotic ATPase	CELLULAR PROCESSES AND SIGNALING	T	Signal transduction mechanisms
IFM89_029625	At4g23850	0	KOG1256	Long-chain acyl-CoA synthetases (AMP-forming)	METABOLISM	I	Lipid transport and metabolism
IFM89_024428	At4g23900	1.63e-119	KOG0888	Nucleoside diphosphate kinase	METABOLISM	F	Nucleotide transport and metabolism
IFM89_037792	At5g28050	2.57e-92	KOG1018	Cytosine deaminase FCY1 and related enzymes	METABOLISM	F	Nucleotide transport and metabolism
IFM89_011300	At4g15830	3.13e-78	KOG2933	Uncharacterized conserved protein	POORLY CHARACTERIZED	S	Function unknown
IFM89_026721	At5g12200	1.13e-227	KOG2584	Dihydroorotase and related enzymes	METABOLISM	F	Nucleotide transport and metabolism
IFM89_002613	At2g23140	2.97e-162	KOG0167	FOG: Armadillo/beta-catenin-like repeats	POORLY CHARACTERIZED	S	Function unknown
IFM89_016919	At1g48850	2.28e-222	KOG4492	Chorismate synthase	METABOLISM	E	Amino acid transport and metabolism
IFM89_001779	At1g21690	5.78e-179	KOG0989	Replication factor C, subunit RFC4	INFORMATION STORAGE AND PROCESSING	L	Replication, recombination and repair
IFM89_021223	At5g58410	0	KOG0803	Predicted E3 ubiquitin ligase	CELLULAR PROCESSES AND SIGNALING	O	Posttranslational modification, protein turnover, chaperones
IFM89_006665	At5g62690	5.84e-160	KOG1375	Beta tubulin	CELLULAR PROCESSES AND SIGNALING	Z	Cytoskeleton
IFM89_016612	At2g27040	0	KOG1041	Translation initiation factor 2C (eIF-2C) and related proteins	INFORMATION STORAGE AND PROCESSING	J	Translation, ribosomal structure and biogenesis
IFM89_005720	At1g75780	5.66e-167	KOG1375	Beta tubulin	CELLULAR PROCESSES AND SIGNALING	Z	Cytoskeleton
IFM89_004137	At3g52560	3.98e-69	KOG0896	Ubiquitin-conjugating enzyme E2	CELLULAR PROCESSES AND SIGNALING	O	Posttranslational modification, protein turnover, chaperones
IFM89_017253	At5g12890	7.24e-133	KOG1192	UDP-glucuronosyl and UDP-glucosyl transferase	METABOLISM	G	Carbohydrate transport and metabolism
IFM89_002021	At2g27870	6.9e-09	KOG1075	FOG: Reverse transcriptase	POORLY CHARACTERIZED	R	General function prediction only
IFM89_017530	At5g19180	2.26e-234	KOG2015	NEDD8-activating complex, catalytic component UBA3	CELLULAR PROCESSES AND SIGNALING	O	Posttranslational modification, protein turnover, chaperones
IFM89_031474	At4g15600	1.08e-19	KOG1075	FOG: Reverse transcriptase	POORLY CHARACTERIZED	R	General function prediction only
IFM89_003837	At1g26550	8.05e-68	KOG3258	Parvulin-like peptidyl-prolyl cis-trans isomerase	CELLULAR PROCESSES AND SIGNALING	O	Posttranslational modification, protein turnover, chaperones
IFM89_039625	At2g02480	0	KOG0989	Replication factor C, subunit RFC4	INFORMATION STORAGE AND PROCESSING	L	Replication, recombination and repair
IFM89_014662	At1g30890	5.13e-67	KOG3094	Predicted membrane protein	POORLY CHARACTERIZED	S	Function unknown
IFM89_033532	At3g51630	5.16e-166	KOG0584	Serine/threonine protein kinase	POORLY CHARACTERIZED	R	General function prediction only
IFM89_010848	At1g53580	7.56e-74	KOG0814	Glyoxylase	POORLY CHARACTERIZED	R	General function prediction only
IFM89_011721	At1g74150	8.26e-104	KOG0379	Kelch repeat-containing proteins	POORLY CHARACTERIZED	R	General function prediction only
IFM89_023373	At3g23550	3.47e-186	KOG1347	Uncharacterized membrane protein, predicted efflux pump	POORLY CHARACTERIZED	R	General function prediction only
IFM89_022837	At2g44740	1.99e-89	KOG1674	Cyclin	POORLY CHARACTERIZED	R	General function prediction only
IFM89_006126	At3g48700	4.71e-92	KOG1515	Arylacetamide deacetylase	CELLULAR PROCESSES AND SIGNALING	V	Defense mechanisms
IFM89_006686	At5g17920	1.93e-47	KOG2263	Methionine synthase II (cobalamin-independent)	METABOLISM	E	Amino acid transport and metabolism
IFM89_023601	At2g31400	4.62e-145	KOG4197	FOG: PPR repeat	POORLY CHARACTERIZED	R	General function prediction only
IFM89_023908	At2g20360	1.63e-192	KOG2865	NADH:ubiquinone oxidoreductase, NDUFA9/39kDa subunit	METABOLISM	C	Energy production and conversion
IFM89_017629	At3g22290	8.8e-154	KOG2667	COPII vesicle protein	CELLULAR PROCESSES AND SIGNALING	U	Intracellular trafficking, secretion, and vesicular transport
IFM89_004466	At1g30970	2.55e-86	KOG2893	Zn finger protein	POORLY CHARACTERIZED	R	General function prediction only
IFM89_013754	At3g22780	3.69e-131	KOG1171	Metallothionein-like protein	METABOLISM	P	Inorganic ion transport and metabolism
IFM89_006798	At3g21420	5.83e-181	KOG0143	Iron/ascorbate family oxidoreductases	METABOLISM	Q	Secondary metabolites biosynthesis, transport and catabolism
IFM89_024077	At5g37350_1	4.65e-198	KOG2270	Serine/threonine protein kinase involved in cell cycle control	CELLULAR PROCESSES AND SIGNALING	T	Signal transduction mechanisms
IFM89_020292	At1g07920	2.9e-279	KOG0052	Translation elongation factor EF-1 alpha/Tu	INFORMATION STORAGE AND PROCESSING	J	Translation, ribosomal structure and biogenesis
IFM89_020962	At2g45620	6.03e-164	KOG2277	S-M checkpoint control protein CID1 and related nucleotidyltransferases	CELLULAR PROCESSES AND SIGNALING	D	Cell cycle control, cell division, chromosome partitioning
IFM89_038536	At4g25050	9.51e-23	KOG1748	Acyl carrier protein/NADH-ubiquinone oxidoreductase, NDUFAB1/SDAP subunit	METABOLISM	C	Energy production and conversion
IFM89_002530	At5g23850	1.51e-222	KOG2458	Endoplasmic reticulum protein EP58, contains filamin rod domain and KDEL motif	POORLY CHARACTERIZED	R	General function prediction only
IFM89_020951	At4g22880	3.17e-193	KOG0143	Iron/ascorbate family oxidoreductases	METABOLISM	Q	Secondary metabolites biosynthesis, transport and catabolism
IFM89_019936	Hs16158889	8.99e-18	KOG3089	Predicted DEAD-box-containing helicase	POORLY CHARACTERIZED	R	General function prediction only
IFM89_037045	At1g48110	8.18e-158	KOG1901	Uncharacterized high-glucose-regulated protein	POORLY CHARACTERIZED	R	General function prediction only
novel.5207	At2g44520	4.45e-10	KOG1380	Heme A farnesyltransferase	METABOLISM	H	Coenzyme transport and metabolism
IFM89_026171	At1g35720	1.97e-105	KOG0819	Annexin	CELLULAR PROCESSES AND SIGNALING	U	Intracellular trafficking, secretion, and vesicular transport
IFM89_012467	At5g55930	0	KOG2262	Sexual differentiation process protein ISP4	CELLULAR PROCESSES AND SIGNALING	T	Signal transduction mechanisms
IFM89_032935	At4g39700	2.4e-67	KOG1603	Copper chaperone	METABOLISM	P	Inorganic ion transport and metabolism
IFM89_032697	At5g20020	1.38e-142	KOG0096	GTPase Ran/TC4/GSP1 (nuclear protein transport pathway), small G protein superfamily	CELLULAR PROCESSES AND SIGNALING	U	Intracellular trafficking, secretion, and vesicular transport
IFM89_024091	At5g62670	0	KOG0205	Plasma membrane H+-transporting ATPase	METABOLISM	P	Inorganic ion transport and metabolism
IFM89_032000	At4g22590	8.18e-182	KOG1050	Trehalose-6-phosphate synthase component TPS1 and related subunits	METABOLISM	G	Carbohydrate transport and metabolism
IFM89_021621	At1g72480	1.24e-241	KOG2568	Predicted membrane protein	POORLY CHARACTERIZED	S	Function unknown
IFM89_001661	At5g38260	2.84e-85	KOG1187	Serine/threonine protein kinase	CELLULAR PROCESSES AND SIGNALING	T	Signal transduction mechanisms
IFM89_034824	At3g22880	4.06e-10	KOG1434	Meiotic recombination protein Dmc1	CELLULAR PROCESSES AND SIGNALING	D	Cell cycle control, cell division, chromosome partitioning
IFM89_023125	At4g13830	3.74e-39	KOG0712	Molecular chaperone (DnaJ superfamily)	CELLULAR PROCESSES AND SIGNALING	O	Posttranslational modification, protein turnover, chaperones
IFM89_002856	At4g16970	4.79e-77	KOG1167	Serine/threonine protein kinase of the CDC7 subfamily involved in DNA synthesis, repair and recombination	INFORMATION STORAGE AND PROCESSING	L	Replication, recombination and repair
IFM89_008820	At3g46460	8.34e-78	KOG0425	Ubiquitin-protein ligase	CELLULAR PROCESSES AND SIGNALING	O	Posttranslational modification, protein turnover, chaperones
IFM89_019815	At5g20720	1.45e-30	KOG1641	Mitochondrial chaperonin	CELLULAR PROCESSES AND SIGNALING	O	Posttranslational modification, protein turnover, chaperones
IFM89_031306	At5g15240	1.83e-130	KOG1303	Amino acid transporters	METABOLISM	E	Amino acid transport and metabolism
IFM89_023004	At2g02390	1.57e-70	KOG0868	Glutathione S-transferase	CELLULAR PROCESSES AND SIGNALING	O	Posttranslational modification, protein turnover, chaperones
IFM89_028086	At1g07370	8.15e-161	KOG1636	DNA polymerase delta processivity factor (proliferating cell nuclear antigen)	INFORMATION STORAGE AND PROCESSING	L	Replication, recombination and repair
IFM89_017240	At3g27360	6.1e-32	KOG1745	Histones H3 and H4	INFORMATION STORAGE AND PROCESSING	B	Chromatin structure and dynamics
IFM89_012324	At1g21720	1.83e-40	KOG0180	20S proteasome, regulatory subunit beta type PSMB3/PUP3	CELLULAR PROCESSES AND SIGNALING	O	Posttranslational modification, protein turnover, chaperones
IFM89_019412	At1g22370	1.29e-148	KOG1192	UDP-glucuronosyl and UDP-glucosyl transferase	METABOLISM	G	Carbohydrate transport and metabolism
IFM89_028725	At2g43190	3.53e-46	KOG4046	RNase MRP and P, subunit POP4/p29	INFORMATION STORAGE AND PROCESSING	A	RNA processing and modification
IFM89_033482	At4g02070	0	KOG0217	Mismatch repair ATPase MSH6 (MutS family)	INFORMATION STORAGE AND PROCESSING	L	Replication, recombination and repair
IFM89_024129	At2g27940	5.88e-28	KOG0800	FOG: Predicted E3 ubiquitin ligase	CELLULAR PROCESSES AND SIGNALING	O	Posttranslational modification, protein turnover, chaperones
IFM89_017109	At5g11860	4.85e-116	KOG1605	TFIIF-interacting CTD phosphatase, including NLI-interacting factor (involved in RNA polymerase II regulation)	INFORMATION STORAGE AND PROCESSING	K	Transcription
IFM89_028102	At3g59030	5.3e-155	KOG1347	Uncharacterized membrane protein, predicted efflux pump	POORLY CHARACTERIZED	R	General function prediction only
IFM89_008185	At1g29060	1.48e-16	KOG1267	Mitochondrial transcription termination factor, mTERF	INFORMATION STORAGE AND PROCESSING	K	Transcription
IFM89_017967	At2g31270	1.26e-79	KOG4762	DNA replication factor	INFORMATION STORAGE AND PROCESSING	L	Replication, recombination and repair
IFM89_033195	At5g11100	3.34e-226	KOG1012	Ca2+-dependent lipid-binding protein CLB1/vesicle protein vp115/Granuphilin A, contains C2 domain	POORLY CHARACTERIZED	R	General function prediction only
IFM89_025623	At1g25350	0	KOG1148	Glutaminyl-tRNA synthetase	INFORMATION STORAGE AND PROCESSING	J	Translation, ribosomal structure and biogenesis
IFM89_008077	At3g02080	1.2e-85	KOG3411	40S ribosomal protein S19	INFORMATION STORAGE AND PROCESSING	J	Translation, ribosomal structure and biogenesis
IFM89_034082	At2g22300	6.1e-270	KOG0520	Uncharacterized conserved protein, contains IPT/TIG domain	POORLY CHARACTERIZED	S	Function unknown
novel.6683	At1g21945	9.39e-120	KOG0017	FOG: Transposon-encoded proteins with TYA, reverse transcriptase, integrase domains in various combinations	POORLY CHARACTERIZED	R	General function prediction only
novel.8227	At4g16340	2.05e-262	KOG1997	PH domain-containing protein	CELLULAR PROCESSES AND SIGNALING	T	Signal transduction mechanisms
IFM89_026244	At3g16980	9.33e-79	KOG2691	RNA polymerase II subunit 9	INFORMATION STORAGE AND PROCESSING	K	Transcription
IFM89_013323	At3g09220	1.66e-267	KOG1263	Multicopper oxidases	METABOLISM	Q	Secondary metabolites biosynthesis, transport and catabolism
IFM89_029024	At5g10650	5.86e-68	KOG0800	FOG: Predicted E3 ubiquitin ligase	CELLULAR PROCESSES AND SIGNALING	O	Posttranslational modification, protein turnover, chaperones
IFM89_030000	At2g19770	4.57e-75	KOG1755	Profilin	CELLULAR PROCESSES AND SIGNALING	Z	Cytoskeleton
IFM89_029294	At4g24960	1.02e-40	KOG1725	Protein involved in membrane traffic (YOP1/TB2/DP1/HVA22 family)	CELLULAR PROCESSES AND SIGNALING	U	Intracellular trafficking, secretion, and vesicular transport
IFM89_012614	At4g31970	6.6e-23	KOG0156	Cytochrome P450 CYP2 subfamily	METABOLISM	Q	Secondary metabolites biosynthesis, transport and catabolism
IFM89_020611	At5g25530	1.4e-164	KOG0714	Molecular chaperone (DnaJ superfamily)	CELLULAR PROCESSES AND SIGNALING	O	Posttranslational modification, protein turnover, chaperones
IFM89_012380	At2g22490	1.43e-81	KOG0656	G1/S-specific cyclin D	CELLULAR PROCESSES AND SIGNALING	D	Cell cycle control, cell division, chromosome partitioning
novel.7223	At2g31080	1.37e-33	KOG1075	FOG: Reverse transcriptase	POORLY CHARACTERIZED	R	General function prediction only
IFM89_029180	At1g60690	8.95e-184	KOG1575	Voltage-gated shaker-like K+ channel, subunit beta/KCNAB	METABOLISM	C	Energy production and conversion
IFM89_027830	At3g45650	1.33e-192	KOG1237	H+/oligopeptide symporter	METABOLISM	E	Amino acid transport and metabolism
IFM89_032666	At4g32551	6.17e-248	KOG0266	WD40 repeat-containing protein	POORLY CHARACTERIZED	R	General function prediction only
IFM89_020515	At4g39330	1.3e-188	KOG0023	Alcohol dehydrogenase, class V	METABOLISM	Q	Secondary metabolites biosynthesis, transport and catabolism
IFM89_003060	At4g10380	9.8e-145	KOG0223	Aquaporin (major intrinsic protein family)	METABOLISM	G	Carbohydrate transport and metabolism
IFM89_015546	At3g54850	5.03e-28	KOG0167	FOG: Armadillo/beta-catenin-like repeats	POORLY CHARACTERIZED	S	Function unknown
IFM89_011377	At1g03675	1.62e-58	KOG0910	Thioredoxin-like protein	CELLULAR PROCESSES AND SIGNALING	O	Posttranslational modification, protein turnover, chaperones
IFM89_015148	At1g69910	1.33e-148	KOG1187	Serine/threonine protein kinase	CELLULAR PROCESSES AND SIGNALING	T	Signal transduction mechanisms
IFM89_019932	At5g13050	6.04e-11	KOG3093	5-formyltetrahydrofolate cyclo-ligase	METABOLISM	H	Coenzyme transport and metabolism
IFM89_005835	At2g45560	4.38e-50	KOG0156	Cytochrome P450 CYP2 subfamily	METABOLISM	Q	Secondary metabolites biosynthesis, transport and catabolism
IFM89_030041	At3g06810	1.06e-232	KOG1469	Predicted acyl-CoA dehydrogenase	POORLY CHARACTERIZED	R	General function prediction only
IFM89_011854	At5g54800	1.17e-197	KOG1441	Glucose-6-phosphate/phosphate and phosphoenolpyruvate/phosphate antiporter	METABOLISM	G	Carbohydrate transport and metabolism
IFM89_005856	At3g13080	0	KOG0054	Multidrug resistance-associated protein/mitoxantrone resistance protein, ABC superfamily	METABOLISM	Q	Secondary metabolites biosynthesis, transport and catabolism
IFM89_034732	Hs7706212	1.08e-64	KOG3347	Predicted nucleotide kinase/nuclear protein involved oxidative stress response	METABOLISM	F	Nucleotide transport and metabolism
IFM89_028509	At5g24270	3.37e-29	KOG0034	Ca2+/calmodulin-dependent protein phosphatase (calcineurin subunit B), EF-Hand superfamily protein	CELLULAR PROCESSES AND SIGNALING	T	Signal transduction mechanisms
IFM89_027074	At5g53080	8.66e-26	KOG1840	Kinesin light chain	CELLULAR PROCESSES AND SIGNALING	Z	Cytoskeleton
IFM89_015202	At2g01140	1.01e-216	KOG1557	Fructose-biphosphate aldolase	METABOLISM	G	Carbohydrate transport and metabolism
IFM89_031374	At1g08570	3.69e-87	KOG0907	Thioredoxin	CELLULAR PROCESSES AND SIGNALING	O	Posttranslational modification, protein turnover, chaperones
IFM89_018917	At4g22380	8.13e-75	KOG3387	60S ribosomal protein 15.5kD/SNU13, NHP2/L7A family (includes ribonuclease P subunit p38), involved in splicing	INFORMATION STORAGE AND PROCESSING	A	RNA processing and modification
IFM89_008547	At4g08920	0	KOG0133	Deoxyribodipyrimidine photolyase/cryptochrome	INFORMATION STORAGE AND PROCESSING	L	Replication, recombination and repair
IFM89_039169	At4g28220	3.31e-11	KOG2495	NADH-dehydrogenase (ubiquinone)	METABOLISM	C	Energy production and conversion
IFM89_008704	At1g51060	5.34e-74	KOG1756	Histone 2A	INFORMATION STORAGE AND PROCESSING	B	Chromatin structure and dynamics
IFM89_001474	At5g45190	1.32e-189	KOG0834	CDK9 kinase-activating protein cyclin T	CELLULAR PROCESSES AND SIGNALING	D	Cell cycle control, cell division, chromosome partitioning
IFM89_019931	At1g05820	1.25e-57	KOG2442	Uncharacterized conserved protein, contains PA domain	POORLY CHARACTERIZED	R	General function prediction only
IFM89_028801	At2g30860	4.71e-99	KOG0867	Glutathione S-transferase	CELLULAR PROCESSES AND SIGNALING	O	Posttranslational modification, protein turnover, chaperones
IFM89_013932	At2g41460	2.4e-172	KOG1294	Apurinic/apyrimidinic endonuclease and related enzymes	INFORMATION STORAGE AND PROCESSING	L	Replication, recombination and repair
IFM89_032610	At4g33940_2	1.1e-107	KOG4199	Uncharacterized conserved protein	POORLY CHARACTERIZED	S	Function unknown
IFM89_014975	At1g55150	2.79e-284	KOG0331	ATP-dependent RNA helicase	INFORMATION STORAGE AND PROCESSING	A	RNA processing and modification
IFM89_018994	At4g35640	1.25e-55	KOG4750	Serine O-acetyltransferase	METABOLISM	E	Amino acid transport and metabolism
novel.2583	At1g09870	1.23e-07	KOG1382	Multiple inositol polyphosphate phosphatase	POORLY CHARACTERIZED	R	General function prediction only
IFM89_025990	At2g43460	4.05e-19	KOG3499	60S ribosomal protein L38	INFORMATION STORAGE AND PROCESSING	J	Translation, ribosomal structure and biogenesis
IFM89_023907	At1g04120	0	KOG0054	Multidrug resistance-associated protein/mitoxantrone resistance protein, ABC superfamily	METABOLISM	Q	Secondary metabolites biosynthesis, transport and catabolism
IFM89_023134	At1g11390	2.46e-110	KOG1236	Predicted unusual protein kinase	POORLY CHARACTERIZED	R	General function prediction only
IFM89_020218	At1g22640	2.01e-79	KOG0048	Transcription factor, Myb superfamily	INFORMATION STORAGE AND PROCESSING	K	Transcription
IFM89_011638	At5g17990	1.19e-126	KOG1438	Anthranilate phosphoribosyltransferase	METABOLISM	E	Amino acid transport and metabolism
IFM89_019279	At3g18040	2.05e-287	KOG0660	Mitogen-activated protein kinase	CELLULAR PROCESSES AND SIGNALING	T	Signal transduction mechanisms
IFM89_000568	At3g52990	5.28e-37	KOG2323	Pyruvate kinase	METABOLISM	G	Carbohydrate transport and metabolism
IFM89_031582	At2g22480	3.09e-11	KOG2440	Pyrophosphate-dependent phosphofructo-1-kinase	METABOLISM	G	Carbohydrate transport and metabolism
IFM89_026192	At2g13360	4.46e-270	KOG2862	Alanine-glyoxylate aminotransferase AGT1	POORLY CHARACTERIZED	R	General function prediction only
IFM89_000696	At2g27040	0	KOG1041	Translation initiation factor 2C (eIF-2C) and related proteins	INFORMATION STORAGE AND PROCESSING	J	Translation, ribosomal structure and biogenesis
IFM89_020271	At1g63440	2.76e-73	KOG0207	Cation transport ATPase	METABOLISM	P	Inorganic ion transport and metabolism
IFM89_025921	At2g39130	3.05e-193	KOG1303	Amino acid transporters	METABOLISM	E	Amino acid transport and metabolism
IFM89_028943	At5g60800	7.46e-47	KOG1603	Copper chaperone	METABOLISM	P	Inorganic ion transport and metabolism
IFM89_033432	At2g42270	2e-11	KOG0951	RNA helicase BRR2, DEAD-box superfamily	INFORMATION STORAGE AND PROCESSING	A	RNA processing and modification
IFM89_033706	At3g53720	0	KOG1650	Predicted K+/H+-antiporter	METABOLISM	P	Inorganic ion transport and metabolism
IFM89_028216	At5g02810	1.3e-141	KOG1601	GATA-4/5/6 transcription factors	INFORMATION STORAGE AND PROCESSING	K	Transcription
IFM89_019204	At5g45290	1.09e-12	KOG0800	FOG: Predicted E3 ubiquitin ligase	CELLULAR PROCESSES AND SIGNALING	O	Posttranslational modification, protein turnover, chaperones
IFM89_003763	At2g25810	1.33e-125	KOG0223	Aquaporin (major intrinsic protein family)	METABOLISM	G	Carbohydrate transport and metabolism
IFM89_026966	At3g23990	0	KOG0356	Mitochondrial chaperonin, Cpn60/Hsp60p	CELLULAR PROCESSES AND SIGNALING	O	Posttranslational modification, protein turnover, chaperones
IFM89_019243	At5g04330	6.89e-69	KOG0156	Cytochrome P450 CYP2 subfamily	METABOLISM	Q	Secondary metabolites biosynthesis, transport and catabolism
novel.7353	At2g45230	2.68e-20	KOG1075	FOG: Reverse transcriptase	POORLY CHARACTERIZED	R	General function prediction only
IFM89_030835	At1g33420	1.17e-07	KOG1844	PHD Zn-finger proteins	POORLY CHARACTERIZED	R	General function prediction only
IFM89_028408	At3g61710	2.05e-30	KOG2751	Beclin-like protein	CELLULAR PROCESSES AND SIGNALING	T	Signal transduction mechanisms
IFM89_017140	At4g21580	2.18e-130	KOG1198	Zinc-binding oxidoreductase	METABOLISM	C	Energy production and conversion
IFM89_011280	At5g58640	2.58e-79	KOG3286	Selenoprotein T	POORLY CHARACTERIZED	R	General function prediction only
IFM89_028029	At3g54140	2.1e-282	KOG1237	H+/oligopeptide symporter	METABOLISM	E	Amino acid transport and metabolism
novel.1253	At4g16650_2	4.37e-08	KOG0104	Molecular chaperones GRP170/SIL1, HSP70 superfamily	CELLULAR PROCESSES AND SIGNALING	O	Posttranslational modification, protein turnover, chaperones
IFM89_023078	At1g79850	2.41e-56	KOG1740	Predicted mitochondrial/chloroplast ribosomal protein S17	INFORMATION STORAGE AND PROCESSING	J	Translation, ribosomal structure and biogenesis
IFM89_001350	At1g68000	1e-80	KOG3240	Phosphatidylinositol synthase	METABOLISM	I	Lipid transport and metabolism
IFM89_030393	At1g16350	1.8e-63	KOG2550	IMP dehydrogenase/GMP reductase	METABOLISM	F	Nucleotide transport and metabolism
IFM89_022397	At4g09320	2.32e-52	KOG0888	Nucleoside diphosphate kinase	METABOLISM	F	Nucleotide transport and metabolism
IFM89_003114	At5g19350	9.25e-45	KOG0118	FOG: RRM domain	POORLY CHARACTERIZED	R	General function prediction only
IFM89_000168	At3g09390	1.61e-24	KOG4738	Predicted metallothionein	METABOLISM	P	Inorganic ion transport and metabolism
IFM89_009429	At3g54810	2.37e-43	KOG1601	GATA-4/5/6 transcription factors	INFORMATION STORAGE AND PROCESSING	K	Transcription
IFM89_018356	At5g45340	1.36e-97	KOG0157	Cytochrome P450 CYP4/CYP19/CYP26 subfamilies	METABOLISM	Q	Secondary metabolites biosynthesis, transport and catabolism
IFM89_012951	At5g56180	1.43e-177	KOG0676	Actin and related proteins	CELLULAR PROCESSES AND SIGNALING	Z	Cytoskeleton
IFM89_025538	At3g05210	3.22e-111	KOG2841	Structure-specific endonuclease ERCC1-XPF, ERCC1 component	INFORMATION STORAGE AND PROCESSING	L	Replication, recombination and repair
IFM89_022583	At3g44330	1.01e-197	KOG2526	Predicted aminopeptidases - M20/M25/M40 family	METABOLISM	E	Amino acid transport and metabolism
IFM89_034842	At5g22330	4.59e-289	KOG1942	DNA helicase, TBP-interacting protein	INFORMATION STORAGE AND PROCESSING	L	Replication, recombination and repair
IFM89_003486	At5g36110	3.39e-80	KOG0157	Cytochrome P450 CYP4/CYP19/CYP26 subfamilies	METABOLISM	Q	Secondary metabolites biosynthesis, transport and catabolism
IFM89_019590	At5g11850	1.09e-231	KOG0192	Tyrosine kinase specific for activated (GTP-bound) p21cdc42Hs	CELLULAR PROCESSES AND SIGNALING	T	Signal transduction mechanisms
IFM89_012442	At1g07660	2.32e-67	KOG3467	Histone H4	INFORMATION STORAGE AND PROCESSING	B	Chromatin structure and dynamics
IFM89_027999	At3g20440	0	KOG0470	1,4-alpha-glucan branching enzyme/starch branching enzyme II	METABOLISM	G	Carbohydrate transport and metabolism
IFM89_002688	At3g63190	8.27e-60	KOG4759	Ribosome recycling factor	INFORMATION STORAGE AND PROCESSING	J	Translation, ribosomal structure and biogenesis
IFM89_016290	At3g62240	1.69e-178	KOG2231	Predicted E3 ubiquitin ligase	CELLULAR PROCESSES AND SIGNALING	O	Posttranslational modification, protein turnover, chaperones
IFM89_033510	At3g13940	3.1e-58	KOG4183	RNA polymerase I 49 kDa subunit	INFORMATION STORAGE AND PROCESSING	K	Transcription
IFM89_036501	At3g02090	3.62e-258	KOG0960	Mitochondrial processing peptidase, beta subunit, and related enzymes (insulinase superfamily)	CELLULAR PROCESSES AND SIGNALING	O	Posttranslational modification, protein turnover, chaperones
IFM89_016537	At1g29810	2.42e-33	KOG4073	Pterin carbinolamine dehydratase PCBD/dimerization cofactor of HNF1	INFORMATION STORAGE AND PROCESSING	K	Transcription
IFM89_031493	At5g18650	1.33e-51	KOG1940	Zn-finger protein	POORLY CHARACTERIZED	R	General function prediction only
IFM89_003336	At1g26190	5.89e-50	KOG4203	Armadillo/beta-Catenin/plakoglobin	CELLULAR PROCESSES AND SIGNALING	T	Signal transduction mechanisms
IFM89_000418	At4g22970	3.01e-73	KOG1849	Regulator of spindle pole body duplication	CELLULAR PROCESSES AND SIGNALING	D	Cell cycle control, cell division, chromosome partitioning
IFM89_004522	At5g65180	3.21e-73	KOG2669	Regulator of nuclear mRNA	INFORMATION STORAGE AND PROCESSING	A	RNA processing and modification
IFM89_002894	At4g38890	3.82e-291	KOG2333	Uncharacterized conserved protein	POORLY CHARACTERIZED	R	General function prediction only
IFM89_012638	At3g51880	3.47e-28	KOG0381	HMG box-containing protein	POORLY CHARACTERIZED	R	General function prediction only
IFM89_012633	At3g07890	7.27e-80	KOG2058	Ypt/Rab GTPase activating protein	CELLULAR PROCESSES AND SIGNALING	U	Intracellular trafficking, secretion, and vesicular transport
novel.8832	At2g39770	1.08e-126	KOG1322	GDP-mannose pyrophosphorylase/mannose-1-phosphate guanylyltransferase	CELLULAR PROCESSES AND SIGNALING	M	Cell wall/membrane/envelope biogenesis
IFM89_026550	At4g27190	6.87e-71	KOG4658	Apoptotic ATPase	CELLULAR PROCESSES AND SIGNALING	T	Signal transduction mechanisms
IFM89_025322	At2g23630	5.32e-249	KOG1263	Multicopper oxidases	METABOLISM	Q	Secondary metabolites biosynthesis, transport and catabolism
IFM89_030746	At1g26100	3.06e-99	KOG1619	Cytochrome b	METABOLISM	C	Energy production and conversion
IFM89_024472	At1g02890_2	5.87e-291	KOG0737	AAA+-type ATPase	CELLULAR PROCESSES AND SIGNALING	O	Posttranslational modification, protein turnover, chaperones
IFM89_026957	At2g20190	5.49e-124	KOG2956	CLIP-associating protein	POORLY CHARACTERIZED	R	General function prediction only
IFM89_012882	At2g40290	1.68e-30	KOG2916	Translation initiation factor 2, alpha subunit (eIF-2alpha)	INFORMATION STORAGE AND PROCESSING	J	Translation, ribosomal structure and biogenesis
IFM89_037971	At1g10290	9.75e-296	KOG0446	Vacuolar sorting protein VPS1, dynamin, and related proteins	CELLULAR PROCESSES AND SIGNALING	U	Intracellular trafficking, secretion, and vesicular transport
novel.8505	At5g02250	7.47e-59	KOG2102	Exosomal 3'-5' exoribonuclease complex, subunit Rrp44/Dis3	INFORMATION STORAGE AND PROCESSING	J	Translation, ribosomal structure and biogenesis
IFM89_028642	At4g18100	1.38e-81	KOG0878	60S ribosomal protein L32	INFORMATION STORAGE AND PROCESSING	J	Translation, ribosomal structure and biogenesis
IFM89_021467	At1g68010	2.64e-253	KOG0069	Glyoxylate/hydroxypyruvate reductase (D-isomer-specific 2-hydroxy acid dehydrogenase superfamily)	METABOLISM	C	Energy production and conversion
IFM89_031005	At2g36200	0	KOG0243	Kinesin-like protein	CELLULAR PROCESSES AND SIGNALING	Z	Cytoskeleton
IFM89_004200	At1g20140	3.53e-14	KOG1724	SCF ubiquitin ligase, Skp1 component	CELLULAR PROCESSES AND SIGNALING	O	Posttranslational modification, protein turnover, chaperones
IFM89_014176	At1g62600	1.32e-182	KOG1399	Flavin-containing monooxygenase	METABOLISM	Q	Secondary metabolites biosynthesis, transport and catabolism
novel.5357	At3g29510	1.98e-49	KOG0017	FOG: Transposon-encoded proteins with TYA, reverse transcriptase, integrase domains in various combinations	POORLY CHARACTERIZED	R	General function prediction only
IFM89_006666	At1g75780	5.67e-44	KOG1375	Beta tubulin	CELLULAR PROCESSES AND SIGNALING	Z	Cytoskeleton
IFM89_005668	At1g05200	0	KOG1052	Glutamate-gated kainate-type ion channel receptor subunit GluR5 and related subunits	METABOLISM	P	Inorganic ion transport and metabolism
IFM89_026027	At5g12190	3.64e-72	KOG0114	Predicted RNA-binding protein (RRM superfamily)	POORLY CHARACTERIZED	R	General function prediction only
IFM89_021448	At5g27000	0	KOG0239	Kinesin (KAR3 subfamily)	CELLULAR PROCESSES AND SIGNALING	Z	Cytoskeleton
IFM89_010258	At5g27840	1.94e-197	KOG0374	Serine/threonine specific protein phosphatase PP1, catalytic subunit	CELLULAR PROCESSES AND SIGNALING	T	Signal transduction mechanisms
IFM89_031867	At1g53320_2	8.1e-176	KOG2502	Tub family proteins	POORLY CHARACTERIZED	R	General function prediction only
IFM89_036518	At2g36320	7.28e-61	KOG3173	Predicted Zn-finger protein	POORLY CHARACTERIZED	R	General function prediction only
IFM89_028448	At1g75330	2.18e-185	KOG1504	Ornithine carbamoyltransferase OTC/ARG3	METABOLISM	E	Amino acid transport and metabolism
IFM89_016826	At5g06410	1.74e-45	KOG3192	Mitochondrial J-type chaperone	CELLULAR PROCESSES AND SIGNALING	O	Posttranslational modification, protein turnover, chaperones
IFM89_019255	At3g03440	2.4e-86	KOG0167	FOG: Armadillo/beta-catenin-like repeats	POORLY CHARACTERIZED	S	Function unknown
novel.8089	YGL201c	1.25e-37	KOG0480	DNA replication licensing factor, MCM6 component	INFORMATION STORAGE AND PROCESSING	L	Replication, recombination and repair
IFM89_015959	At3g55480_2	0	KOG1060	Vesicle coat complex AP-3, beta subunit	CELLULAR PROCESSES AND SIGNALING	U	Intracellular trafficking, secretion, and vesicular transport
IFM89_001137	At1g75980	2.76e-64	KOG3266	Predicted glycine cleavage system H protein	METABOLISM	E	Amino acid transport and metabolism
IFM89_028449	At3g14570	2.18e-250	KOG0916	1,3-beta-glucan synthase/callose synthase catalytic subunit	CELLULAR PROCESSES AND SIGNALING	M	Cell wall/membrane/envelope biogenesis
IFM89_032277	At4g04610_1	1.34e-105	KOG0189	Phosphoadenosine phosphosulfate reductase	METABOLISM	E	Amino acid transport and metabolism
IFM89_038381	At1g28060	3.52e-251	KOG2769	Putative u4/u6 small nuclear ribonucleoprotein	INFORMATION STORAGE AND PROCESSING	A	RNA processing and modification
novel.3748	At2g27040	7.18e-10	KOG1041	Translation initiation factor 2C (eIF-2C) and related proteins	INFORMATION STORAGE AND PROCESSING	J	Translation, ribosomal structure and biogenesis
IFM89_032397	At1g80500	4.17e-41	KOG3487	TRAPP 20 K subunit	CELLULAR PROCESSES AND SIGNALING	U	Intracellular trafficking, secretion, and vesicular transport
IFM89_024634	At3g09270	1.52e-61	KOG0406	Glutathione S-transferase	CELLULAR PROCESSES AND SIGNALING	O	Posttranslational modification, protein turnover, chaperones
IFM89_026140	At5g11200	8.68e-247	KOG0329	ATP-dependent RNA helicase	INFORMATION STORAGE AND PROCESSING	A	RNA processing and modification
IFM89_032693	At1g52360	0	KOG0276	Vesicle coat complex COPI, beta' subunit	CELLULAR PROCESSES AND SIGNALING	U	Intracellular trafficking, secretion, and vesicular transport
IFM89_036712	At5g07590	7.65e-195	KOG4497	Uncharacterized conserved protein WDR8, contains WD repeats	POORLY CHARACTERIZED	R	General function prediction only
novel.5602	At1g07590	2.98e-07	KOG4197	FOG: PPR repeat	POORLY CHARACTERIZED	R	General function prediction only
IFM89_035201	At5g16080	3.76e-57	KOG1515	Arylacetamide deacetylase	CELLULAR PROCESSES AND SIGNALING	V	Defense mechanisms
IFM89_001912	At4g02840	1.5e-58	KOG3428	Small nuclear ribonucleoprotein SMD1 and related snRNPs	INFORMATION STORAGE AND PROCESSING	A	RNA processing and modification
novel.8698	At2g46710	3.48e-36	KOG4270	GTPase-activator protein	CELLULAR PROCESSES AND SIGNALING	T	Signal transduction mechanisms
IFM89_037632	At5g66330	2.25e-105	KOG0619	FOG: Leucine rich repeat	POORLY CHARACTERIZED	R	General function prediction only
novel.206	At2g26430	1.51e-13	KOG0835	Cyclin L	POORLY CHARACTERIZED	R	General function prediction only
novel.6584	At5g25110	6.55e-74	KOG0583	Serine/threonine protein kinase	CELLULAR PROCESSES AND SIGNALING	T	Signal transduction mechanisms
IFM89_027022	At4g13310	1.32e-62	KOG0156	Cytochrome P450 CYP2 subfamily	METABOLISM	Q	Secondary metabolites biosynthesis, transport and catabolism
IFM89_018653	At5g60040	3.92e-254	KOG0261	RNA polymerase III, large subunit	INFORMATION STORAGE AND PROCESSING	K	Transcription
novel.1012	At2g28980	1.77e-12	KOG1075	FOG: Reverse transcriptase	POORLY CHARACTERIZED	R	General function prediction only
IFM89_024860	At1g14690	1.63e-38	KOG4302	Microtubule-associated protein essential for anaphase spindle elongation	CELLULAR PROCESSES AND SIGNALING	D	Cell cycle control, cell division, chromosome partitioning
IFM89_021713	At1g53680	1.39e-88	KOG0406	Glutathione S-transferase	CELLULAR PROCESSES AND SIGNALING	O	Posttranslational modification, protein turnover, chaperones
IFM89_033737	At4g02460	2.31e-34	KOG1978	DNA mismatch repair protein - MLH2/PMS1/Pms2 family	INFORMATION STORAGE AND PROCESSING	L	Replication, recombination and repair
IFM89_007360	At3g10650	3.02e-58	KOG0845	Nuclear pore complex, Nup98 component (sc Nup145/Nup100/Nup116)	CELLULAR PROCESSES AND SIGNALING	Y	Nuclear structure
IFM89_027726	At5g50230	2.96e-61	KOG0288	WD40 repeat protein TipD	POORLY CHARACTERIZED	R	General function prediction only
IFM89_038792	At1g56700	4.53e-78	KOG4755	Predicted pyroglutamyl peptidase	CELLULAR PROCESSES AND SIGNALING	O	Posttranslational modification, protein turnover, chaperones
IFM89_028639	At1g29400	4.15e-277	KOG4660	Protein Mei2, essential for commitment to meiosis, and related proteins	CELLULAR PROCESSES AND SIGNALING	D	Cell cycle control, cell division, chromosome partitioning
IFM89_002529	At3g54770	7.76e-62	KOG0149	Predicted RNA-binding protein SEB4 (RRM superfamily)	POORLY CHARACTERIZED	R	General function prediction only
IFM89_030369	At5g46280	0	KOG0479	DNA replication licensing factor, MCM3 component	INFORMATION STORAGE AND PROCESSING	L	Replication, recombination and repair
IFM89_037123	At2g05710	1.36e-194	KOG0452	RNA-binding translational regulator IRP (aconitase superfamily)	INFORMATION STORAGE AND PROCESSING	A	RNA processing and modification
IFM89_002301	At1g60690	8.96e-98	KOG1575	Voltage-gated shaker-like K+ channel, subunit beta/KCNAB	METABOLISM	C	Energy production and conversion
IFM89_002726	At5g27540	0	KOG1707	Predicted Ras related/Rac-GTP binding protein	CELLULAR PROCESSES AND SIGNALING	V	Defense mechanisms
IFM89_000005	At1g17500	1.37e-62	KOG0206	P-type ATPase	POORLY CHARACTERIZED	R	General function prediction only
IFM89_037660	At1g15880	2.51e-112	KOG3208	SNARE protein GS28	CELLULAR PROCESSES AND SIGNALING	U	Intracellular trafficking, secretion, and vesicular transport
IFM89_021004	At2g27480	6.88e-37	KOG0037	Ca2+-binding protein, EF-Hand protein superfamily	CELLULAR PROCESSES AND SIGNALING	T	Signal transduction mechanisms
IFM89_038351	At4g13550	9.14e-204	KOG4569	Predicted lipase	METABOLISM	I	Lipid transport and metabolism
IFM89_022450	At1g80080	6.29e-82	KOG0619	FOG: Leucine rich repeat	POORLY CHARACTERIZED	R	General function prediction only
IFM89_011081	At3g46940	3.03e-88	KOG3370	dUTPase	METABOLISM	F	Nucleotide transport and metabolism
IFM89_036184	At1g46264	2.52e-110	KOG0627	Heat shock transcription factor	INFORMATION STORAGE AND PROCESSING	K	Transcription
IFM89_031889	At2g26560	2.69e-178	KOG0513	Ca2+-independent phospholipase A2	METABOLISM	I	Lipid transport and metabolism
IFM89_020134	At4g08900	3.7e-215	KOG2964	Arginase family protein	METABOLISM	E	Amino acid transport and metabolism
novel.1931	At1g73600	2.77e-14	KOG1269	SAM-dependent methyltransferases	METABOLISM	I	Lipid transport and metabolism
novel.1234	At3g13750	2.92e-10	KOG0496	Beta-galactosidase	METABOLISM	G	Carbohydrate transport and metabolism
IFM89_023222	At1g64550	9.24e-51	KOG0062	ATPase component of ABC transporters with duplicated ATPase domains/Translation elongation factor EF-3b	METABOLISM	E	Amino acid transport and metabolism
IFM89_013118	At1g79350	9.85e-11	KOG1513	Nuclear helicase MOP-3/SNO (DEAD-box superfamily)	INFORMATION STORAGE AND PROCESSING	K	Transcription
IFM89_036327	At4g25960	0	KOG0055	Multidrug/pheromone exporter, ABC superfamily	METABOLISM	Q	Secondary metabolites biosynthesis, transport and catabolism
IFM89_010069	At2g15900	2.45e-296	KOG2101	Intermediate filament-like protein, sorting nexins, and related proteins containing PX (PhoX) domain(s)	CELLULAR PROCESSES AND SIGNALING	Z	Cytoskeleton
IFM89_005266	At5g64200	1.48e-42	KOG4207	Predicted splicing factor, SR protein superfamily	INFORMATION STORAGE AND PROCESSING	A	RNA processing and modification
IFM89_024215	At3g55280	7.96e-78	KOG1751	60s ribosomal protein L23	INFORMATION STORAGE AND PROCESSING	J	Translation, ribosomal structure and biogenesis
IFM89_017875	At1g19100	7.18e-103	KOG1845	MORC family ATPases	CELLULAR PROCESSES AND SIGNALING	D	Cell cycle control, cell division, chromosome partitioning
IFM89_035036	At3g62120	1.8e-40	KOG4163	Prolyl-tRNA synthetase	INFORMATION STORAGE AND PROCESSING	J	Translation, ribosomal structure and biogenesis
IFM89_000692	At3g10970	8.55e-106	KOG2914	Predicted haloacid-halidohydrolase and related hydrolases	POORLY CHARACTERIZED	R	General function prediction only
IFM89_009606	At3g63400	1.91e-47	KOG0865	Cyclophilin type peptidyl-prolyl cis-trans isomerase	CELLULAR PROCESSES AND SIGNALING	O	Posttranslational modification, protein turnover, chaperones
IFM89_016394	At5g06690	3.19e-59	KOG0907	Thioredoxin	CELLULAR PROCESSES AND SIGNALING	O	Posttranslational modification, protein turnover, chaperones
IFM89_032932	At1g77460	0	KOG0167	FOG: Armadillo/beta-catenin-like repeats	POORLY CHARACTERIZED	S	Function unknown
IFM89_002150	At5g18400	5.53e-70	KOG4020	Protein DRE2, required for cell viability	POORLY CHARACTERIZED	S	Function unknown
IFM89_030323	At5g58040	5.49e-126	KOG1049	Polyadenylation factor I complex, subunit FIP1	INFORMATION STORAGE AND PROCESSING	A	RNA processing and modification
IFM89_000107	At4g19830	3.83e-11	KOG0552	FKBP-type peptidyl-prolyl cis-trans isomerase	CELLULAR PROCESSES AND SIGNALING	O	Posttranslational modification, protein turnover, chaperones
IFM89_026699	At5g04140	0	KOG0399	Glutamate synthase	METABOLISM	E	Amino acid transport and metabolism
IFM89_034018	At2g16700	1.41e-74	KOG1735	Actin depolymerizing factor	CELLULAR PROCESSES AND SIGNALING	Z	Cytoskeleton
IFM89_020884	At1g14710	1.67e-119	KOG4176	Uncharacterized conserved protein	POORLY CHARACTERIZED	S	Function unknown
IFM89_018825	At3g20560	5.05e-124	KOG2667	COPII vesicle protein	CELLULAR PROCESSES AND SIGNALING	U	Intracellular trafficking, secretion, and vesicular transport
IFM89_021016	At3g03610	7.03e-109	KOG2998	Uncharacterized conserved protein	POORLY CHARACTERIZED	S	Function unknown
IFM89_030347	At5g54160	1.08e-137	KOG3178	Hydroxyindole-O-methyltransferase and related SAM-dependent methyltransferases	POORLY CHARACTERIZED	R	General function prediction only
IFM89_015911	At2g27040	0	KOG1041	Translation initiation factor 2C (eIF-2C) and related proteins	INFORMATION STORAGE AND PROCESSING	J	Translation, ribosomal structure and biogenesis
IFM89_003366	At2g04030	0	KOG0019	Molecular chaperone (HSP90 family)	CELLULAR PROCESSES AND SIGNALING	O	Posttranslational modification, protein turnover, chaperones
IFM89_017670	At3g14420	1.82e-225	KOG0538	Glycolate oxidase	METABOLISM	C	Energy production and conversion
IFM89_025562	At2g17730	5.11e-85	KOG0800	FOG: Predicted E3 ubiquitin ligase	CELLULAR PROCESSES AND SIGNALING	O	Posttranslational modification, protein turnover, chaperones
IFM89_009281	At3g51000	4.35e-60	KOG4178	Soluble epoxide hydrolase	METABOLISM	I	Lipid transport and metabolism
novel.2888	At4g21420	3.62e-08	KOG1075	FOG: Reverse transcriptase	POORLY CHARACTERIZED	R	General function prediction only
IFM89_032930	At4g39680	9.06e-111	KOG2416	Acinus (induces apoptotic chromatin condensation)	INFORMATION STORAGE AND PROCESSING	B	Chromatin structure and dynamics
IFM89_018826	At5g54780	1.28e-235	KOG2197	Ypt/Rab-specific GTPase-activating protein GYP7 and related proteins	CELLULAR PROCESSES AND SIGNALING	T	Signal transduction mechanisms
IFM89_025401	At3g30390	6.08e-218	KOG1305	Amino acid transporter protein	METABOLISM	E	Amino acid transport and metabolism
IFM89_014418	At4g09720	2.39e-113	KOG0394	Ras-related GTPase	POORLY CHARACTERIZED	R	General function prediction only
IFM89_035988	At1g12850	8.22e-153	KOG0234	Fructose-6-phosphate 2-kinase/fructose-2,6-biphosphatase	METABOLISM	G	Carbohydrate transport and metabolism
IFM89_001511	At5g55160	3.63e-46	KOG1769	Ubiquitin-like proteins	CELLULAR PROCESSES AND SIGNALING	O	Posttranslational modification, protein turnover, chaperones
IFM89_024205	At1g08490	4.76e-101	KOG1549	Cysteine desulfurase NFS1	METABOLISM	E	Amino acid transport and metabolism
novel.3664	At5g13750	1.43e-10	KOG2615	Permease of the major facilitator superfamily	POORLY CHARACTERIZED	R	General function prediction only
IFM89_022665	At2g37060	8.7e-74	KOG0869	CCAAT-binding factor, subunit A (HAP3)	INFORMATION STORAGE AND PROCESSING	K	Transcription
IFM89_039686	At2g32080	1.52e-102	KOG3074	Transcriptional regulator of the PUR family, single-stranded-DNA-binding	INFORMATION STORAGE AND PROCESSING	K	Transcription
IFM89_010120	At4g38380	5.46e-71	KOG1347	Uncharacterized membrane protein, predicted efflux pump	POORLY CHARACTERIZED	R	General function prediction only
novel.1757	At3g14470	3.45e-116	KOG4658	Apoptotic ATPase	CELLULAR PROCESSES AND SIGNALING	T	Signal transduction mechanisms
novel.8142	At1g20880	1.45e-31	KOG0149	Predicted RNA-binding protein SEB4 (RRM superfamily)	POORLY CHARACTERIZED	R	General function prediction only
IFM89_000202	At3g20250	3.77e-125	KOG1488	Translational repressor Pumilio/PUF3 and related RNA-binding proteins (Puf superfamily)	INFORMATION STORAGE AND PROCESSING	J	Translation, ribosomal structure and biogenesis
IFM89_015731	At1g19270	1.59e-200	KOG1703	Adaptor protein Enigma and related PDZ-LIM proteins	CELLULAR PROCESSES AND SIGNALING	T	Signal transduction mechanisms
IFM89_024467	At5g16210	0	KOG0211	Protein phosphatase 2A regulatory subunit A and related proteins	CELLULAR PROCESSES AND SIGNALING	T	Signal transduction mechanisms
IFM89_021473	At4g35100	1.56e-178	KOG0223	Aquaporin (major intrinsic protein family)	METABOLISM	G	Carbohydrate transport and metabolism
IFM89_035696	At2g22610	0	KOG0239	Kinesin (KAR3 subfamily)	CELLULAR PROCESSES AND SIGNALING	Z	Cytoskeleton
IFM89_012894	At5g58490	5.16e-155	KOG1502	Flavonol reductase/cinnamoyl-CoA reductase	CELLULAR PROCESSES AND SIGNALING	V	Defense mechanisms
IFM89_010181	At4g36220	1.84e-15	KOG0156	Cytochrome P450 CYP2 subfamily	METABOLISM	Q	Secondary metabolites biosynthesis, transport and catabolism
IFM89_031311	At1g26810	2.13e-241	KOG2287	Galactosyltransferases	METABOLISM	G	Carbohydrate transport and metabolism
IFM89_028348	At1g26840	3.79e-105	KOG4557	Origin recognition complex, subunit 6	INFORMATION STORAGE AND PROCESSING	L	Replication, recombination and repair
IFM89_001793	At2g01070	1.19e-217	KOG2568	Predicted membrane protein	POORLY CHARACTERIZED	S	Function unknown
IFM89_030368	At5g46290	7.76e-289	KOG1394	3-oxoacyl-(acyl-carrier-protein) synthase (I and II)	METABOLISM	I	Lipid transport and metabolism
IFM89_026117	At2g32060	3.09e-60	KOG3406	40S ribosomal protein S12	INFORMATION STORAGE AND PROCESSING	J	Translation, ribosomal structure and biogenesis
IFM89_011094	At1g13980	0	KOG0928	Pattern-formation protein/guanine nucleotide exchange factor	CELLULAR PROCESSES AND SIGNALING	U	Intracellular trafficking, secretion, and vesicular transport
IFM89_011862	At5g25900	7.25e-212	KOG0156	Cytochrome P450 CYP2 subfamily	METABOLISM	Q	Secondary metabolites biosynthesis, transport and catabolism
IFM89_028284	At2g14580	1.11e-68	KOG3017	Defense-related protein containing SCP domain	POORLY CHARACTERIZED	S	Function unknown
IFM89_036151	At2g34930	5.07e-45	KOG0619	FOG: Leucine rich repeat	POORLY CHARACTERIZED	R	General function prediction only
IFM89_028397	At4g18590_2	1.98e-38	KOG1716	Dual specificity phosphatase	CELLULAR PROCESSES AND SIGNALING	V	Defense mechanisms
IFM89_006946	At5g04160	1.07e-132	KOG1441	Glucose-6-phosphate/phosphate and phosphoenolpyruvate/phosphate antiporter	METABOLISM	G	Carbohydrate transport and metabolism
IFM89_031998	At1g62660	6.28e-274	KOG0228	Beta-fructofuranosidase (invertase)	METABOLISM	G	Carbohydrate transport and metabolism
novel.4926	At2g05640	7.66e-177	KOG0987	DNA helicase PIF1/RRM3	CELLULAR PROCESSES AND SIGNALING	D	Cell cycle control, cell division, chromosome partitioning
IFM89_032646	At1g51200	3.23e-44	KOG3173	Predicted Zn-finger protein	POORLY CHARACTERIZED	R	General function prediction only
IFM89_031902	At1g20960	0	KOG0951	RNA helicase BRR2, DEAD-box superfamily	INFORMATION STORAGE AND PROCESSING	A	RNA processing and modification
IFM89_025272	At1g62310	5.94e-284	KOG1356	Putative transcription factor 5qNCA, contains JmjC domain	INFORMATION STORAGE AND PROCESSING	K	Transcription
IFM89_012198	At2g22250	9.68e-224	KOG0257	Kynurenine aminotransferase, glutamine transaminase K	METABOLISM	E	Amino acid transport and metabolism
IFM89_009747	At1g21780	3.22e-181	KOG1987	Speckle-type POZ protein SPOP and related proteins with TRAF, MATH and BTB/POZ domains	CELLULAR PROCESSES AND SIGNALING	D	Cell cycle control, cell division, chromosome partitioning
IFM89_011165	At1g32340	1.76e-176	KOG1814	Predicted E3 ubiquitin ligase	CELLULAR PROCESSES AND SIGNALING	O	Posttranslational modification, protein turnover, chaperones
IFM89_001923	At1g10670	5.86e-270	KOG1254	ATP-citrate lyase	METABOLISM	C	Energy production and conversion
IFM89_029725	At2g07690	1.09e-267	KOG0481	DNA replication licensing factor, MCM5 component	INFORMATION STORAGE AND PROCESSING	L	Replication, recombination and repair
IFM89_037505	At5g26675	1.07e-165	KOG2519	5'-3' exonuclease	INFORMATION STORAGE AND PROCESSING	L	Replication, recombination and repair
IFM89_029652	At5g53470	5.99e-50	KOG0817	Acyl-CoA-binding protein	METABOLISM	I	Lipid transport and metabolism
IFM89_039816	At5g20290	3.91e-33	KOG3283	40S ribosomal protein S8	INFORMATION STORAGE AND PROCESSING	J	Translation, ribosomal structure and biogenesis
novel.8651	At1g19230	1.48e-56	KOG0039	Ferric reductase, NADH/NADPH oxidase and related proteins	METABOLISM	P	Inorganic ion transport and metabolism
IFM89_031172	At5g41080	4.3e-148	KOG2421	Predicted starch-binding protein	POORLY CHARACTERIZED	R	General function prediction only
IFM89_029863	At1g64060	0	KOG0039	Ferric reductase, NADH/NADPH oxidase and related proteins	METABOLISM	P	Inorganic ion transport and metabolism
IFM89_017535	At2g22360	7.39e-35	KOG0715	Molecular chaperone (DnaJ superfamily)	CELLULAR PROCESSES AND SIGNALING	O	Posttranslational modification, protein turnover, chaperones
IFM89_028167	At3g24110	6.24e-54	KOG0027	Calmodulin and related proteins (EF-Hand superfamily)	CELLULAR PROCESSES AND SIGNALING	T	Signal transduction mechanisms
IFM89_024134	At2g38020	8.55e-06	KOG2280	Vacuolar assembly/sorting protein VPS16	CELLULAR PROCESSES AND SIGNALING	U	Intracellular trafficking, secretion, and vesicular transport
IFM89_035776	At5g13840	1e-263	KOG0305	Anaphase promoting complex, Cdc20, Cdh1, and Ama1 subunits	CELLULAR PROCESSES AND SIGNALING	D	Cell cycle control, cell division, chromosome partitioning
IFM89_009448	At3g14460	2.59e-20	KOG4658	Apoptotic ATPase	CELLULAR PROCESSES AND SIGNALING	T	Signal transduction mechanisms
IFM89_035658	At3g14460	2.91e-33	KOG4658	Apoptotic ATPase	CELLULAR PROCESSES AND SIGNALING	T	Signal transduction mechanisms
IFM89_011738	At5g61000	2.79e-275	KOG0851	Single-stranded DNA-binding replication protein A (RPA), large (70 kD) subunit and related ssDNA-binding proteins	INFORMATION STORAGE AND PROCESSING	L	Replication, recombination and repair
IFM89_039930	At2g33410	4.11e-97	KOG4205	RNA-binding protein musashi/mRNA cleavage and polyadenylation factor I complex, subunit HRP1	INFORMATION STORAGE AND PROCESSING	A	RNA processing and modification
IFM89_009984	At4g25200	4.89e-32	KOG0710	Molecular chaperone (small heat-shock protein Hsp26/Hsp42)	CELLULAR PROCESSES AND SIGNALING	O	Posttranslational modification, protein turnover, chaperones
IFM89_038677	At2g23180	1.4e-74	KOG0157	Cytochrome P450 CYP4/CYP19/CYP26 subfamilies	METABOLISM	Q	Secondary metabolites biosynthesis, transport and catabolism
IFM89_024734	At3g52970	1.55e-73	KOG0156	Cytochrome P450 CYP2 subfamily	METABOLISM	Q	Secondary metabolites biosynthesis, transport and catabolism
IFM89_021584	At3g14180	1.13e-33	KOG4282	Transcription factor GT-2 and related proteins, contains trihelix DNA-binding/SANT domain	INFORMATION STORAGE AND PROCESSING	K	Transcription
IFM89_035182	At4g32610	1.37e-16	KOG2536	MAM33, mitochondrial matrix glycoprotein	METABOLISM	C	Energy production and conversion
IFM89_005060	At5g67320	3.64e-191	KOG0273	Beta-transducin family (WD-40 repeat) protein	INFORMATION STORAGE AND PROCESSING	B	Chromatin structure and dynamics
IFM89_009751	At1g19910	7.33e-94	KOG0232	Vacuolar H+-ATPase V0 sector, subunits c/c'	METABOLISM	C	Energy production and conversion
IFM89_037756	At3g06350	3.81e-215	KOG0692	Pentafunctional AROM protein	METABOLISM	E	Amino acid transport and metabolism
IFM89_025249	At4g04950	1.4e-249	KOG0911	Glutaredoxin-related protein	CELLULAR PROCESSES AND SIGNALING	O	Posttranslational modification, protein turnover, chaperones
novel.7288	At5g50330	1.46e-29	KOG1235	Predicted unusual protein kinase	POORLY CHARACTERIZED	R	General function prediction only
IFM89_019089	At4g25280	3.76e-82	KOG3079	Uridylate kinase/adenylate kinase	METABOLISM	F	Nucleotide transport and metabolism
IFM89_014938	At5g39790	1.08e-84	KOG1616	Protein involved in Snf1 protein kinase complex assembly	METABOLISM	G	Carbohydrate transport and metabolism
novel.7402	At4g32050	2.22e-20	KOG2611	Neurochondrin/leucine-rich protein (Neurochondrin)	POORLY CHARACTERIZED	S	Function unknown
IFM89_038412	At2g02870	1.34e-160	KOG1072	FOG: Kelch repeat	POORLY CHARACTERIZED	R	General function prediction only
IFM89_030980	At2g45570	8.98e-119	KOG0156	Cytochrome P450 CYP2 subfamily	METABOLISM	Q	Secondary metabolites biosynthesis, transport and catabolism
IFM89_029032	At1g67940	2.97e-87	KOG0055	Multidrug/pheromone exporter, ABC superfamily	METABOLISM	Q	Secondary metabolites biosynthesis, transport and catabolism
IFM89_011095	At5g49550	4.32e-147	KOG4254	Phytoene desaturase	METABOLISM	H	Coenzyme transport and metabolism
IFM89_007721	At3g19820	0	KOG1262	FAD-binding protein DIMINUTO	POORLY CHARACTERIZED	R	General function prediction only
novel.8230	At2g32080	2.26e-34	KOG3074	Transcriptional regulator of the PUR family, single-stranded-DNA-binding	INFORMATION STORAGE AND PROCESSING	K	Transcription
IFM89_000852	At4g19610	3.8e-193	KOG0110	RNA-binding protein (RRM superfamily)	POORLY CHARACTERIZED	R	General function prediction only
IFM89_002750	At1g29720	1.25e-07	KOG1187	Serine/threonine protein kinase	CELLULAR PROCESSES AND SIGNALING	T	Signal transduction mechanisms
IFM89_010810	At4g03100	3.49e-153	KOG4270	GTPase-activator protein	CELLULAR PROCESSES AND SIGNALING	T	Signal transduction mechanisms
IFM89_032683	At4g13360	4.65e-164	KOG1684	Enoyl-CoA hydratase	METABOLISM	I	Lipid transport and metabolism
IFM89_024276	At1g20670	5.32e-93	KOG0955	PHD finger protein BR140/LIN-49	POORLY CHARACTERIZED	R	General function prediction only
IFM89_030974	At5g45430	1.29e-172	KOG0661	MAPK related serine/threonine protein kinase	CELLULAR PROCESSES AND SIGNALING	T	Signal transduction mechanisms
IFM89_039565	At1g55620	0	KOG0475	Cl- channel CLC-3 and related proteins (CLC superfamily)	METABOLISM	P	Inorganic ion transport and metabolism
IFM89_015473	At1g63690	4.4e-265	KOG2442	Uncharacterized conserved protein, contains PA domain	POORLY CHARACTERIZED	R	General function prediction only
IFM89_012238	At5g05550	6.76e-50	KOG4282	Transcription factor GT-2 and related proteins, contains trihelix DNA-binding/SANT domain	INFORMATION STORAGE AND PROCESSING	K	Transcription
IFM89_017929	At5g40610	1.3e-204	KOG2711	Glycerol-3-phosphate dehydrogenase/dihydroxyacetone 3-phosphate reductase	METABOLISM	C	Energy production and conversion
novel.3741	At1g59265	8.18e-159	KOG0017	FOG: Transposon-encoded proteins with TYA, reverse transcriptase, integrase domains in various combinations	POORLY CHARACTERIZED	R	General function prediction only
IFM89_019889	At5g20660	1.3e-57	KOG2194	Aminopeptidases of the M20 family	CELLULAR PROCESSES AND SIGNALING	O	Posttranslational modification, protein turnover, chaperones
IFM89_025009	At3g24730	4.54e-75	KOG3414	Component of the U4/U6.U5 snRNP/mitosis protein DIM1	INFORMATION STORAGE AND PROCESSING	A	RNA processing and modification
IFM89_003215	At5g36940	9.29e-287	KOG1286	Amino acid transporters	METABOLISM	E	Amino acid transport and metabolism
novel.1016	At3g06680	2.33e-11	KOG3504	60S ribosomal protein L29	INFORMATION STORAGE AND PROCESSING	J	Translation, ribosomal structure and biogenesis
IFM89_001989	At5g42890	3.89e-58	KOG4170	2-enoyl-CoA hydratase/3-hydroxyacyl-CoA dehydrogenase/Peroxisomal 3-ketoacyl-CoA-thiolase, sterol-binding domain and related enzymes	METABOLISM	I	Lipid transport and metabolism
IFM89_014117	At3g07090	4.04e-61	KOG0324	Uncharacterized conserved protein	POORLY CHARACTERIZED	S	Function unknown
IFM89_019086	At4g27800	1.27e-08	KOG0698	Serine/threonine protein phosphatase	CELLULAR PROCESSES AND SIGNALING	T	Signal transduction mechanisms
novel.8448	At2g43160	5.19e-22	KOG2056	Equilibrative nucleoside transporter protein	METABOLISM	F	Nucleotide transport and metabolism
IFM89_036373	At2g27920	9.45e-132	KOG1283	Serine carboxypeptidases	CELLULAR PROCESSES AND SIGNALING	O	Posttranslational modification, protein turnover, chaperones
novel.8431	At1g05870	9.34e-34	KOG4197	FOG: PPR repeat	POORLY CHARACTERIZED	R	General function prediction only
IFM89_008345	At2g26660	5.28e-113	KOG1161	Protein involved in vacuolar polyphosphate accumulation, contains SPX domain	METABOLISM	P	Inorganic ion transport and metabolism
IFM89_003354	At1g80070	0	KOG1795	U5 snRNP spliceosome subunit	INFORMATION STORAGE AND PROCESSING	A	RNA processing and modification
IFM89_010585	At1g69850	8.14e-136	KOG1237	H+/oligopeptide symporter	METABOLISM	E	Amino acid transport and metabolism
IFM89_026790	At2g18020	2.78e-180	KOG2309	60s ribosomal protein L2/L8	INFORMATION STORAGE AND PROCESSING	J	Translation, ribosomal structure and biogenesis
novel.8346	At1g05680	5.29e-78	KOG1192	UDP-glucuronosyl and UDP-glucosyl transferase	METABOLISM	G	Carbohydrate transport and metabolism
IFM89_008393	At3g14470	1.11e-15	KOG4658	Apoptotic ATPase	CELLULAR PROCESSES AND SIGNALING	T	Signal transduction mechanisms
IFM89_001159	At4g10770	0	KOG2262	Sexual differentiation process protein ISP4	CELLULAR PROCESSES AND SIGNALING	T	Signal transduction mechanisms
IFM89_018067	At4g30810	2.49e-159	KOG1282	Serine carboxypeptidases (lysosomal cathepsin A)	CELLULAR PROCESSES AND SIGNALING	O	Posttranslational modification, protein turnover, chaperones
IFM89_039690	At2g33680	7.71e-101	KOG4197	FOG: PPR repeat	POORLY CHARACTERIZED	R	General function prediction only
IFM89_026274	At1g10510	4.9e-47	KOG4308	LRR-containing protein	POORLY CHARACTERIZED	S	Function unknown
novel.8579	At4g39660	7.9e-74	KOG1404	Alanine-glyoxylate aminotransferase AGT2	METABOLISM	E	Amino acid transport and metabolism
IFM89_035103	At2g39630	9.89e-150	KOG2977	Glycosyltransferase	POORLY CHARACTERIZED	R	General function prediction only
IFM89_022546	At1g59540	5.48e-252	KOG0242	Kinesin-like protein	CELLULAR PROCESSES AND SIGNALING	Z	Cytoskeleton
IFM89_004836	At5g39030	4.86e-15	KOG1187	Serine/threonine protein kinase	CELLULAR PROCESSES AND SIGNALING	T	Signal transduction mechanisms
IFM89_009567	At3g66658	0	KOG2454	Betaine aldehyde dehydrogenase	METABOLISM	C	Energy production and conversion
IFM89_032723	At5g08410	4.23e-155	KOG2672	Lipoate synthase	METABOLISM	H	Coenzyme transport and metabolism
IFM89_028551	At3g14470	6.09e-15	KOG4658	Apoptotic ATPase	CELLULAR PROCESSES AND SIGNALING	T	Signal transduction mechanisms
IFM89_004483	At4g28510	7.16e-127	KOG3090	Prohibitin-like protein	CELLULAR PROCESSES AND SIGNALING	O	Posttranslational modification, protein turnover, chaperones
IFM89_038836	At1g33540	3.54e-138	KOG1282	Serine carboxypeptidases (lysosomal cathepsin A)	CELLULAR PROCESSES AND SIGNALING	O	Posttranslational modification, protein turnover, chaperones
IFM89_003494	At4g35160	5.98e-119	KOG3178	Hydroxyindole-O-methyltransferase and related SAM-dependent methyltransferases	POORLY CHARACTERIZED	R	General function prediction only
novel.7054	At5g58530	9.74e-71	KOG2824	Glutaredoxin-related protein	CELLULAR PROCESSES AND SIGNALING	O	Posttranslational modification, protein turnover, chaperones
IFM89_017023	At1g64500	7.22e-93	KOG2824	Glutaredoxin-related protein	CELLULAR PROCESSES AND SIGNALING	O	Posttranslational modification, protein turnover, chaperones
IFM89_021801	At1g07380	7.76e-277	KOG2232	Ceramidases	CELLULAR PROCESSES AND SIGNALING	T	Signal transduction mechanisms
IFM89_003104	At1g69420	9.52e-175	KOG1311	DHHC-type Zn-finger proteins	POORLY CHARACTERIZED	R	General function prediction only
IFM89_010332	At3g07090	3.99e-112	KOG0324	Uncharacterized conserved protein	POORLY CHARACTERIZED	S	Function unknown
novel.5969	At2g28980	1.13e-20	KOG1075	FOG: Reverse transcriptase	POORLY CHARACTERIZED	R	General function prediction only
IFM89_025212	At3g17205	1.86e-261	KOG0942	E3 ubiquitin protein ligase	CELLULAR PROCESSES AND SIGNALING	O	Posttranslational modification, protein turnover, chaperones
IFM89_031480	At5g05780	6.78e-194	KOG1556	26S proteasome regulatory complex, subunit RPN8/PSMD7	CELLULAR PROCESSES AND SIGNALING	O	Posttranslational modification, protein turnover, chaperones
IFM89_029751	At5g25630	8.51e-27	KOG4197	FOG: PPR repeat	POORLY CHARACTERIZED	R	General function prediction only
IFM89_024633	At1g65560	5.76e-133	KOG1196	Predicted NAD-dependent oxidoreductase	POORLY CHARACTERIZED	R	General function prediction only
IFM89_000069	At1g49430	1.02e-257	KOG1256	Long-chain acyl-CoA synthetases (AMP-forming)	METABOLISM	I	Lipid transport and metabolism
IFM89_036317	At4g19150	1.17e-14	KOG0504	FOG: Ankyrin repeat	POORLY CHARACTERIZED	R	General function prediction only
IFM89_033155	At4g26300	3.51e-300	KOG4426	Arginyl-tRNA synthetase	INFORMATION STORAGE AND PROCESSING	J	Translation, ribosomal structure and biogenesis
IFM89_027166	At5g01850	9.91e-14	KOG0192	Tyrosine kinase specific for activated (GTP-bound) p21cdc42Hs	CELLULAR PROCESSES AND SIGNALING	T	Signal transduction mechanisms
novel.8661	At3g43190	1.3e-130	KOG0853	Glycosyltransferase	CELLULAR PROCESSES AND SIGNALING	M	Cell wall/membrane/envelope biogenesis
IFM89_021559	At4g10770	2.06e-29	KOG2262	Sexual differentiation process protein ISP4	CELLULAR PROCESSES AND SIGNALING	T	Signal transduction mechanisms
IFM89_019447	At5g58330	4.52e-238	KOG1496	Malate dehydrogenase	METABOLISM	C	Energy production and conversion
IFM89_014638	At1g11680	1.41e-299	KOG0684	Cytochrome P450	METABOLISM	Q	Secondary metabolites biosynthesis, transport and catabolism
IFM89_034536	At5g47310	2.47e-97	KOG0324	Uncharacterized conserved protein	POORLY CHARACTERIZED	S	Function unknown
IFM89_014316	At1g24300	1.11e-78	KOG1862	GYF domain containing proteins	POORLY CHARACTERIZED	R	General function prediction only
IFM89_026922	Hs4505935	1.06e-82	KOG3818	DNA polymerase epsilon, subunit B	INFORMATION STORAGE AND PROCESSING	L	Replication, recombination and repair
IFM89_037189	At1g67370	7.33e-09	KOG4652	HORMA domain	INFORMATION STORAGE AND PROCESSING	B	Chromatin structure and dynamics
IFM89_036190	At1g02850	8.55e-142	KOG0626	Beta-glucosidase, lactase phlorizinhydrolase, and related proteins	METABOLISM	G	Carbohydrate transport and metabolism
IFM89_028869	At5g27730	3.06e-179	KOG4683	Uncharacterized conserved protein	POORLY CHARACTERIZED	S	Function unknown
IFM89_003342	At5g03870	3.34e-31	KOG2824	Glutaredoxin-related protein	CELLULAR PROCESSES AND SIGNALING	O	Posttranslational modification, protein turnover, chaperones
IFM89_024811	At5g42390	1.28e-188	KOG0959	N-arginine dibasic convertase NRD1 and related Zn2+-dependent endopeptidases, insulinase superfamily	CELLULAR PROCESSES AND SIGNALING	O	Posttranslational modification, protein turnover, chaperones
IFM89_034760	At5g04220	5.53e-238	KOG1012	Ca2+-dependent lipid-binding protein CLB1/vesicle protein vp115/Granuphilin A, contains C2 domain	POORLY CHARACTERIZED	R	General function prediction only
IFM89_034017	At5g64920	8.9e-59	KOG0800	FOG: Predicted E3 ubiquitin ligase	CELLULAR PROCESSES AND SIGNALING	O	Posttranslational modification, protein turnover, chaperones
IFM89_014169	At1g12200	4.08e-167	KOG1399	Flavin-containing monooxygenase	METABOLISM	Q	Secondary metabolites biosynthesis, transport and catabolism
IFM89_002363	At4g02580	7.71e-126	KOG3196	NADH:ubiquinone oxidoreductase, NDUFV2/24 kD subunit	METABOLISM	C	Energy production and conversion
IFM89_032216	At1g07830	9.54e-69	KOG3331	Mitochondrial/chloroplast ribosomal protein L4/L29	INFORMATION STORAGE AND PROCESSING	J	Translation, ribosomal structure and biogenesis
IFM89_000782	At1g59950	3.7e-55	KOG1577	Aldo/keto reductase family proteins	POORLY CHARACTERIZED	R	General function prediction only
IFM89_028266	At2g38710	4.58e-113	KOG3274	Uncharacterized conserved protein, AMMECR1	POORLY CHARACTERIZED	S	Function unknown
IFM89_014014	At5g13690	9.26e-86	KOG2233	Alpha-N-acetylglucosaminidase	CELLULAR PROCESSES AND SIGNALING	U	Intracellular trafficking, secretion, and vesicular transport
IFM89_035844	At3g55320	0	KOG0055	Multidrug/pheromone exporter, ABC superfamily	METABOLISM	Q	Secondary metabolites biosynthesis, transport and catabolism
IFM89_011003	At5g25560	7.04e-123	KOG1940	Zn-finger protein	POORLY CHARACTERIZED	R	General function prediction only
IFM89_034895	At3g14460	3.17e-18	KOG4658	Apoptotic ATPase	CELLULAR PROCESSES AND SIGNALING	T	Signal transduction mechanisms
IFM89_006069	At3g10540	2.04e-265	KOG0592	3-phosphoinositide-dependent protein kinase (PDK1)	CELLULAR PROCESSES AND SIGNALING	T	Signal transduction mechanisms
IFM89_009684	At5g57870	1.92e-57	KOG0401	Translation initiation factor 4F, ribosome/mRNA-bridging subunit (eIF-4G)	INFORMATION STORAGE AND PROCESSING	J	Translation, ribosomal structure and biogenesis
IFM89_035320	At4g30610	1.21e-251	KOG1282	Serine carboxypeptidases (lysosomal cathepsin A)	CELLULAR PROCESSES AND SIGNALING	O	Posttranslational modification, protein turnover, chaperones
IFM89_036397	At1g72660	8.84e-265	KOG1486	GTP-binding protein DRG2 (ODN superfamily)	CELLULAR PROCESSES AND SIGNALING	T	Signal transduction mechanisms
IFM89_000680	At5g14820	4.42e-96	KOG4197	FOG: PPR repeat	POORLY CHARACTERIZED	R	General function prediction only
IFM89_036620	At3g12110	1.1e-273	KOG0676	Actin and related proteins	CELLULAR PROCESSES AND SIGNALING	Z	Cytoskeleton
IFM89_015116	At3g14770	3.35e-72	KOG1623	Multitransmembrane protein	POORLY CHARACTERIZED	R	General function prediction only
IFM89_008229	At1g15510	4.41e-148	KOG4197	FOG: PPR repeat	POORLY CHARACTERIZED	R	General function prediction only
IFM89_020956	At3g54210	8.47e-95	KOG3280	Mitochondrial/chloroplast ribosomal protein L17	INFORMATION STORAGE AND PROCESSING	J	Translation, ribosomal structure and biogenesis
IFM89_027844	At1g50940	1.14e-29	KOG3954	Electron transfer flavoprotein, alpha subunit	METABOLISM	C	Energy production and conversion
IFM89_023665	At4g13020	2.58e-162	KOG0661	MAPK related serine/threonine protein kinase	CELLULAR PROCESSES AND SIGNALING	T	Signal transduction mechanisms
IFM89_004532	At2g14610	6.37e-27	KOG3017	Defense-related protein containing SCP domain	POORLY CHARACTERIZED	S	Function unknown
IFM89_024666	At1g74320	2e-183	KOG2686	Choline kinase	CELLULAR PROCESSES AND SIGNALING	M	Cell wall/membrane/envelope biogenesis
IFM89_017256	At1g71840	3.84e-68	KOG0296	Angio-associated migratory cell protein (contains WD40 repeats)	POORLY CHARACTERIZED	S	Function unknown
IFM89_010397	At3g48560	0	KOG4166	Thiamine pyrophosphate-requiring enzyme	METABOLISM	E	Amino acid transport and metabolism
IFM89_032242	At1g17020	4.01e-109	KOG0143	Iron/ascorbate family oxidoreductases	METABOLISM	Q	Secondary metabolites biosynthesis, transport and catabolism
IFM89_029675	At5g28540	0	KOG0100	Molecular chaperones GRP78/BiP/KAR2, HSP70 superfamily	CELLULAR PROCESSES AND SIGNALING	O	Posttranslational modification, protein turnover, chaperones
IFM89_023317	7293113	1.37e-17	KOG3277	Uncharacterized conserved protein	POORLY CHARACTERIZED	S	Function unknown
IFM89_011865	At4g37100	0	KOG2142	Molybdenum cofactor sulfurase	METABOLISM	H	Coenzyme transport and metabolism
novel.8198	At5g12890	2.91e-94	KOG1192	UDP-glucuronosyl and UDP-glucosyl transferase	METABOLISM	G	Carbohydrate transport and metabolism
IFM89_025095	At3g63120	2.78e-61	KOG1674	Cyclin	POORLY CHARACTERIZED	R	General function prediction only
IFM89_039876	At5g52920	1.38e-58	KOG2323	Pyruvate kinase	METABOLISM	G	Carbohydrate transport and metabolism
IFM89_004014	At4g22130	2.04e-189	KOG1187	Serine/threonine protein kinase	CELLULAR PROCESSES AND SIGNALING	T	Signal transduction mechanisms
IFM89_000901	At1g18460	1.74e-266	KOG2624	Triglyceride lipase-cholesterol esterase	METABOLISM	I	Lipid transport and metabolism
IFM89_026461	At1g16190	6.74e-153	KOG0011	Nucleotide excision repair factor NEF2, RAD23 component	INFORMATION STORAGE AND PROCESSING	L	Replication, recombination and repair
IFM89_003547	At4g17890_2	1.42e-111	KOG1865	Ubiquitin carboxyl-terminal hydrolase	CELLULAR PROCESSES AND SIGNALING	O	Posttranslational modification, protein turnover, chaperones
IFM89_018702	At5g47120	1.33e-127	KOG1629	Bax-mediated apoptosis inhibitor TEGT/BI-1	CELLULAR PROCESSES AND SIGNALING	V	Defense mechanisms
IFM89_036812	At1g65440	0	KOG1856	Transcription elongation factor SPT6	INFORMATION STORAGE AND PROCESSING	A	RNA processing and modification
IFM89_009310	At5g49470	1.16e-174	KOG0192	Tyrosine kinase specific for activated (GTP-bound) p21cdc42Hs	CELLULAR PROCESSES AND SIGNALING	T	Signal transduction mechanisms
IFM89_000797	At3g48170	0	KOG2450	Aldehyde dehydrogenase	METABOLISM	C	Energy production and conversion
IFM89_028299	At1g60170	1.28e-104	KOG2574	mRNA splicing factor PRP31	INFORMATION STORAGE AND PROCESSING	A	RNA processing and modification
IFM89_035758	At2g36350	1.59e-211	KOG0610	Putative serine/threonine protein kinase	POORLY CHARACTERIZED	R	General function prediction only
IFM89_013743	At3g51895	0	KOG0236	Sulfate/bicarbonate/oxalate exchanger SAT-1 and related transporters (SLC26 family)	METABOLISM	P	Inorganic ion transport and metabolism
IFM89_024662	At1g01580	4.7e-285	KOG0039	Ferric reductase, NADH/NADPH oxidase and related proteins	METABOLISM	P	Inorganic ion transport and metabolism
IFM89_038835	At1g73270	1.92e-78	KOG1282	Serine carboxypeptidases (lysosomal cathepsin A)	CELLULAR PROCESSES AND SIGNALING	O	Posttranslational modification, protein turnover, chaperones
IFM89_039503	Hs18777675	4.15e-41	KOG1493	Anaphase-promoting complex (APC), subunit 11	CELLULAR PROCESSES AND SIGNALING	D	Cell cycle control, cell division, chromosome partitioning
IFM89_005957	At1g16180	2.93e-231	KOG2592	Tumor differentially expressed (TDE) protein	POORLY CHARACTERIZED	S	Function unknown
IFM89_036917	At1g09760	2.07e-107	KOG1644	U2-associated snRNP A' protein	INFORMATION STORAGE AND PROCESSING	A	RNA processing and modification
IFM89_024771	At3g04710_2	1.43e-14	KOG0548	Molecular co-chaperone STI1	CELLULAR PROCESSES AND SIGNALING	O	Posttranslational modification, protein turnover, chaperones
IFM89_019096	At5g24270	1.81e-33	KOG0034	Ca2+/calmodulin-dependent protein phosphatase (calcineurin subunit B), EF-Hand superfamily protein	CELLULAR PROCESSES AND SIGNALING	T	Signal transduction mechanisms
IFM89_008585	At4g34110	6.06e-104	KOG0123	Polyadenylate-binding protein (RRM superfamily)	INFORMATION STORAGE AND PROCESSING	A	RNA processing and modification
IFM89_022694	At4g33790	1.12e-194	KOG1221	Acyl-CoA reductase	METABOLISM	I	Lipid transport and metabolism
IFM89_004626	At4g38040	1.6e-35	KOG1021	Acetylglucosaminyltransferase EXT1/exostosin 1	METABOLISM	G	Carbohydrate transport and metabolism
IFM89_015545	At3g10530	3.35e-138	KOG1272	WD40-repeat-containing subunit of the 18S rRNA processing complex	INFORMATION STORAGE AND PROCESSING	A	RNA processing and modification
IFM89_004625	At4g38040	5.29e-38	KOG1021	Acetylglucosaminyltransferase EXT1/exostosin 1	METABOLISM	G	Carbohydrate transport and metabolism
IFM89_007701	At1g11950	3.45e-206	KOG1356	Putative transcription factor 5qNCA, contains JmjC domain	INFORMATION STORAGE AND PROCESSING	K	Transcription
IFM89_007567	At3g04470	4.24e-304	KOG0522	Ankyrin repeat protein	POORLY CHARACTERIZED	R	General function prediction only
IFM89_027149	At4g27960	1.57e-64	KOG0417	Ubiquitin-protein ligase	CELLULAR PROCESSES AND SIGNALING	O	Posttranslational modification, protein turnover, chaperones
IFM89_032787	At5g27740	6.94e-53	KOG2035	Replication factor C, subunit RFC3	CELLULAR PROCESSES AND SIGNALING	D	Cell cycle control, cell division, chromosome partitioning
IFM89_012330	At5g63810	0	KOG0496	Beta-galactosidase	METABOLISM	G	Carbohydrate transport and metabolism
IFM89_037977	At3g18790	1.41e-22	KOG3068	mRNA splicing factor	INFORMATION STORAGE AND PROCESSING	A	RNA processing and modification
IFM89_032673	At1g80370	7.01e-141	KOG0654	G2/Mitotic-specific cyclin A	CELLULAR PROCESSES AND SIGNALING	D	Cell cycle control, cell division, chromosome partitioning
IFM89_021686	At3g13772	0	KOG1278	Endosomal membrane proteins, EMP70	CELLULAR PROCESSES AND SIGNALING	U	Intracellular trafficking, secretion, and vesicular transport
IFM89_001283	At5g39830	6e-62	KOG1320	Serine protease	CELLULAR PROCESSES AND SIGNALING	O	Posttranslational modification, protein turnover, chaperones
IFM89_011596	At5g38510	3.82e-97	KOG2289	Rhomboid family proteins	CELLULAR PROCESSES AND SIGNALING	T	Signal transduction mechanisms
novel.6910	At2g15410	1.46e-122	KOG0017	FOG: Transposon-encoded proteins with TYA, reverse transcriptase, integrase domains in various combinations	POORLY CHARACTERIZED	R	General function prediction only
IFM89_007755	At4g27760	2.43e-198	KOG1208	Dehydrogenases with different specificities (related to short-chain alcohol dehydrogenases)	METABOLISM	Q	Secondary metabolites biosynthesis, transport and catabolism
IFM89_032573	At3g63470	2.84e-89	KOG1282	Serine carboxypeptidases (lysosomal cathepsin A)	CELLULAR PROCESSES AND SIGNALING	O	Posttranslational modification, protein turnover, chaperones
novel.1680	At2g17910	2.03e-78	KOG1075	FOG: Reverse transcriptase	POORLY CHARACTERIZED	R	General function prediction only
novel.7917	At2g01350	1.26e-06	KOG3008	Quinolinate phosphoribosyl transferase	METABOLISM	F	Nucleotide transport and metabolism
IFM89_020042	At5g15080	1.91e-235	KOG1187	Serine/threonine protein kinase	CELLULAR PROCESSES AND SIGNALING	T	Signal transduction mechanisms
IFM89_009133	At3g63060	1.06e-101	KOG1571	Predicted E3 ubiquitin ligase	CELLULAR PROCESSES AND SIGNALING	O	Posttranslational modification, protein turnover, chaperones
IFM89_020526	At5g55230	8.32e-220	KOG4302	Microtubule-associated protein essential for anaphase spindle elongation	CELLULAR PROCESSES AND SIGNALING	D	Cell cycle control, cell division, chromosome partitioning
novel.4201	At3g01380	1.44e-08	KOG2124	Glycosylphosphatidylinositol anchor synthesis protein	CELLULAR PROCESSES AND SIGNALING	T	Signal transduction mechanisms
IFM89_005222	At4g31970	4.3e-24	KOG0156	Cytochrome P450 CYP2 subfamily	METABOLISM	Q	Secondary metabolites biosynthesis, transport and catabolism
IFM89_023215	At1g03280	4.08e-36	KOG2593	Transcription initiation factor IIE, alpha subunit	INFORMATION STORAGE AND PROCESSING	K	Transcription
IFM89_018367	At5g47530	7.64e-24	KOG4293	Predicted membrane protein, contains DoH and Cytochrome b-561/ferric reductase transmembrane domains	CELLULAR PROCESSES AND SIGNALING	T	Signal transduction mechanisms
IFM89_029760	At2g29420	9.66e-62	KOG0406	Glutathione S-transferase	CELLULAR PROCESSES AND SIGNALING	O	Posttranslational modification, protein turnover, chaperones
IFM89_037494	At4g04880	5.04e-130	KOG1097	Adenine deaminase/adenosine deaminase	METABOLISM	F	Nucleotide transport and metabolism
IFM89_025505	At5g06060	1.39e-74	KOG0725	Reductases with broad range of substrate specificities	POORLY CHARACTERIZED	R	General function prediction only
IFM89_005816	At2g31400	1.09e-21	KOG4197	FOG: PPR repeat	POORLY CHARACTERIZED	R	General function prediction only
IFM89_017249	At3g52140	0	KOG1839	Uncharacterized protein CLU1/cluA/TIF31 involved in mitochondrial morphology/distribution, also found associated with eIF-3	POORLY CHARACTERIZED	R	General function prediction only
IFM89_028240	At2g47900	1.25e-209	KOG2502	Tub family proteins	POORLY CHARACTERIZED	R	General function prediction only
IFM89_021582	At4g25730	7.33e-284	KOG1098	Putative SAM-dependent rRNA methyltransferase SPB1	INFORMATION STORAGE AND PROCESSING	A	RNA processing and modification
IFM89_029703	At5g42020	4.15e-57	KOG0100	Molecular chaperones GRP78/BiP/KAR2, HSP70 superfamily	CELLULAR PROCESSES AND SIGNALING	O	Posttranslational modification, protein turnover, chaperones
IFM89_039456	At4g36750	3.65e-40	KOG3135	1,4-benzoquinone reductase-like; Trp repressor binding protein-like/protoplast-secreted protein	POORLY CHARACTERIZED	R	General function prediction only
IFM89_023944	At5g43940	5.22e-223	KOG0022	Alcohol dehydrogenase, class III	METABOLISM	Q	Secondary metabolites biosynthesis, transport and catabolism
IFM89_015890	At1g54690	2.6e-79	KOG1756	Histone 2A	INFORMATION STORAGE AND PROCESSING	B	Chromatin structure and dynamics
IFM89_015581	At1g61250	2.05e-102	KOG3088	Secretory carrier membrane protein	CELLULAR PROCESSES AND SIGNALING	U	Intracellular trafficking, secretion, and vesicular transport
IFM89_006859	At2g45540	0	KOG1787	Kinase A-anchor protein Neurobeachin and related BEACH and WD40 repeat proteins	CELLULAR PROCESSES AND SIGNALING	U	Intracellular trafficking, secretion, and vesicular transport
IFM89_036356	At4g03020	1.18e-154	KOG0266	WD40 repeat-containing protein	POORLY CHARACTERIZED	R	General function prediction only
IFM89_020860	At2g45580	6.8e-57	KOG0156	Cytochrome P450 CYP2 subfamily	METABOLISM	Q	Secondary metabolites biosynthesis, transport and catabolism
IFM89_021980	At1g22170	6.75e-153	KOG0235	Phosphoglycerate mutase	METABOLISM	G	Carbohydrate transport and metabolism
IFM89_006214	At3g44110	9.14e-131	KOG0712	Molecular chaperone (DnaJ superfamily)	CELLULAR PROCESSES AND SIGNALING	O	Posttranslational modification, protein turnover, chaperones
IFM89_004576	At1g13750	0	KOG1378	Purple acid phosphatase	METABOLISM	G	Carbohydrate transport and metabolism
IFM89_022467	At3g01300	1.47e-164	KOG1187	Serine/threonine protein kinase	CELLULAR PROCESSES AND SIGNALING	T	Signal transduction mechanisms
IFM89_027160	At2g36830	1.72e-123	KOG0223	Aquaporin (major intrinsic protein family)	METABOLISM	G	Carbohydrate transport and metabolism
IFM89_028056	At2g29580	1.86e-203	KOG0153	Predicted RNA-binding protein (RRM superfamily)	POORLY CHARACTERIZED	R	General function prediction only
IFM89_032974	At2g35120	4.19e-81	KOG3373	Glycine cleavage system H protein (lipoate-binding)	METABOLISM	E	Amino acid transport and metabolism
IFM89_021007	At3g47180	7.5e-22	KOG0800	FOG: Predicted E3 ubiquitin ligase	CELLULAR PROCESSES AND SIGNALING	O	Posttranslational modification, protein turnover, chaperones
IFM89_017071	At2g43820	1.16e-168	KOG1192	UDP-glucuronosyl and UDP-glucosyl transferase	METABOLISM	G	Carbohydrate transport and metabolism
IFM89_018019	At3g23320_2	6.59e-42	KOG3485	Uncharacterized conserved protein	POORLY CHARACTERIZED	S	Function unknown
novel.8857	At3g48880	1.17e-10	KOG1947	Leucine rich repeat proteins, some proteins contain F-box	POORLY CHARACTERIZED	R	General function prediction only
IFM89_030445	At3g62270	0	KOG1172	Na+-independent Cl/HCO3 exchanger AE1 and related transporters (SLC4 family)	METABOLISM	P	Inorganic ion transport and metabolism
IFM89_020017	At1g54430	7.97e-12	KOG0987	DNA helicase PIF1/RRM3	CELLULAR PROCESSES AND SIGNALING	D	Cell cycle control, cell division, chromosome partitioning
novel.5622	At1g20390	1.22e-13	KOG0017	FOG: Transposon-encoded proteins with TYA, reverse transcriptase, integrase domains in various combinations	POORLY CHARACTERIZED	R	General function prediction only
IFM89_010273	At2g30200	4.36e-164	KOG2926	Malonyl-CoA:ACP transacylase	METABOLISM	I	Lipid transport and metabolism
IFM89_020392	At2g22490	3.77e-33	KOG0656	G1/S-specific cyclin D	CELLULAR PROCESSES AND SIGNALING	D	Cell cycle control, cell division, chromosome partitioning
IFM89_020869	At3g17980	2.87e-81	KOG1030	Predicted Ca2+-dependent phospholipid-binding protein	POORLY CHARACTERIZED	R	General function prediction only
IFM89_021291	At2g30580	1.56e-113	KOG2660	Locus-specific chromosome binding proteins	POORLY CHARACTERIZED	S	Function unknown
IFM89_011910	At4g31940	1.11e-196	KOG0156	Cytochrome P450 CYP2 subfamily	METABOLISM	Q	Secondary metabolites biosynthesis, transport and catabolism
IFM89_025496	At1g75250	5.89e-16	KOG0724	Zuotin and related molecular chaperones (DnaJ superfamily), contains DNA-binding domains	CELLULAR PROCESSES AND SIGNALING	O	Posttranslational modification, protein turnover, chaperones
IFM89_011706	At1g13710	1.01e-236	KOG0156	Cytochrome P450 CYP2 subfamily	METABOLISM	Q	Secondary metabolites biosynthesis, transport and catabolism
novel.4985	At1g13440	6.18e-08	KOG0657	Glyceraldehyde 3-phosphate dehydrogenase	METABOLISM	G	Carbohydrate transport and metabolism
IFM89_037156	At1g54730	3.26e-16	KOG0254	Predicted transporter (major facilitator superfamily)	POORLY CHARACTERIZED	R	General function prediction only
novel.8613	At4g08920	8.64e-214	KOG0133	Deoxyribodipyrimidine photolyase/cryptochrome	INFORMATION STORAGE AND PROCESSING	L	Replication, recombination and repair
IFM89_032455	At4g36720	1.93e-64	KOG1725	Protein involved in membrane traffic (YOP1/TB2/DP1/HVA22 family)	CELLULAR PROCESSES AND SIGNALING	U	Intracellular trafficking, secretion, and vesicular transport
IFM89_030812	At4g04910	1.73e-23	KOG0741	AAA+-type ATPase	CELLULAR PROCESSES AND SIGNALING	O	Posttranslational modification, protein turnover, chaperones
IFM89_011803	At3g51780	3.38e-56	KOG4361	BCL2-associated athanogene-like proteins and related BAG family chaperone regulators	CELLULAR PROCESSES AND SIGNALING	T	Signal transduction mechanisms
IFM89_009020	At1g07110	5.42e-181	KOG0234	Fructose-6-phosphate 2-kinase/fructose-2,6-biphosphatase	METABOLISM	G	Carbohydrate transport and metabolism
IFM89_037175	At2g17530	7.77e-247	KOG1290	Serine/threonine protein kinase	CELLULAR PROCESSES AND SIGNALING	T	Signal transduction mechanisms
IFM89_010604	At3g16890	3.94e-59	KOG4197	FOG: PPR repeat	POORLY CHARACTERIZED	R	General function prediction only
IFM89_002908	At4g02570	3.63e-79	KOG2166	Cullins	CELLULAR PROCESSES AND SIGNALING	D	Cell cycle control, cell division, chromosome partitioning
IFM89_031415	At4g31970	6.22e-29	KOG0156	Cytochrome P450 CYP2 subfamily	METABOLISM	Q	Secondary metabolites biosynthesis, transport and catabolism
IFM89_036318	At3g02650_2	1.29e-12	KOG4197	FOG: PPR repeat	POORLY CHARACTERIZED	R	General function prediction only
IFM89_001780	At1g21640	0	KOG2178	Predicted sugar kinase	METABOLISM	G	Carbohydrate transport and metabolism
IFM89_022225	At4g31480	0	KOG1058	Vesicle coat complex COPI, beta subunit	CELLULAR PROCESSES AND SIGNALING	U	Intracellular trafficking, secretion, and vesicular transport
IFM89_029784	At2g29490	5.27e-70	KOG0406	Glutathione S-transferase	CELLULAR PROCESSES AND SIGNALING	O	Posttranslational modification, protein turnover, chaperones
novel.8350	At3g25500	7.81e-56	KOG1922	Rho GTPase effector BNI1 and related formins	CELLULAR PROCESSES AND SIGNALING	T	Signal transduction mechanisms
IFM89_025554	At4g12620	7.03e-110	KOG1514	Origin recognition complex, subunit 1, and related proteins	INFORMATION STORAGE AND PROCESSING	L	Replication, recombination and repair
IFM89_034075	At1g75850	0	KOG1107	Membrane coat complex Retromer, subunit VPS35	CELLULAR PROCESSES AND SIGNALING	U	Intracellular trafficking, secretion, and vesicular transport
IFM89_032766	At3g03900	1.47e-111	KOG0635	Adenosine 5'-phosphosulfate kinase	METABOLISM	P	Inorganic ion transport and metabolism
IFM89_014763	At3g14470	1.31e-128	KOG4658	Apoptotic ATPase	CELLULAR PROCESSES AND SIGNALING	T	Signal transduction mechanisms
IFM89_034046	At1g75950	3.87e-41	KOG1724	SCF ubiquitin ligase, Skp1 component	CELLULAR PROCESSES AND SIGNALING	O	Posttranslational modification, protein turnover, chaperones
IFM89_006138	At5g11860	8.6e-88	KOG1605	TFIIF-interacting CTD phosphatase, including NLI-interacting factor (involved in RNA polymerase II regulation)	INFORMATION STORAGE AND PROCESSING	K	Transcription
IFM89_029892	At1g65280_2	9.99e-33	KOG4188	Uncharacterized conserved protein	POORLY CHARACTERIZED	S	Function unknown
IFM89_006883	At1g52930	6.36e-177	KOG2971	RNA-binding protein required for biogenesis of the ribosomal 60S subunit	INFORMATION STORAGE AND PROCESSING	J	Translation, ribosomal structure and biogenesis
IFM89_017520	At3g05250	1.6e-68	KOG4430	Topoisomerase I-binding arginine-serine-rich protein	INFORMATION STORAGE AND PROCESSING	K	Transcription
IFM89_011417	At5g14230	9.78e-246	KOG0504	FOG: Ankyrin repeat	POORLY CHARACTERIZED	R	General function prediction only
IFM89_007816	At2g13810	1.66e-180	KOG0257	Kynurenine aminotransferase, glutamine transaminase K	METABOLISM	E	Amino acid transport and metabolism
IFM89_015368	At1g79000	0	KOG1778	CREB binding protein/P300 and related TAZ Zn-finger proteins	INFORMATION STORAGE AND PROCESSING	K	Transcription
IFM89_028499	At1g66770	5.39e-71	KOG1623	Multitransmembrane protein	POORLY CHARACTERIZED	R	General function prediction only
IFM89_029688	At1g64650	3.16e-284	KOG4332	Predicted sugar transporter	METABOLISM	G	Carbohydrate transport and metabolism
novel.4860	At2g45230	7.04e-151	KOG1075	FOG: Reverse transcriptase	POORLY CHARACTERIZED	R	General function prediction only
IFM89_013362	At5g62620	0	KOG2287	Galactosyltransferases	METABOLISM	G	Carbohydrate transport and metabolism
IFM89_023854	At5g35360	0	KOG0238	3-Methylcrotonyl-CoA carboxylase, biotin-containing subunit/Propionyl-CoA carboxylase, alpha chain/Acetyl-CoA carboxylase, biotin carboxylase subunit	METABOLISM	I	Lipid transport and metabolism
IFM89_028482	At2g30830	1.55e-106	KOG0143	Iron/ascorbate family oxidoreductases	METABOLISM	Q	Secondary metabolites biosynthesis, transport and catabolism
IFM89_025774	At1g27470	1.28e-268	KOG2048	WD40 repeat protein	POORLY CHARACTERIZED	R	General function prediction only
IFM89_024904	At2g22120	1.13e-133	KOG1609	Protein involved in mRNA turnover and stability	INFORMATION STORAGE AND PROCESSING	A	RNA processing and modification
IFM89_027079	At5g62690	1.36e-30	KOG1375	Beta tubulin	CELLULAR PROCESSES AND SIGNALING	Z	Cytoskeleton
IFM89_031464	At2g45960	2.07e-184	KOG0223	Aquaporin (major intrinsic protein family)	METABOLISM	G	Carbohydrate transport and metabolism
IFM89_022982	At5g51600	7.41e-256	KOG4302	Microtubule-associated protein essential for anaphase spindle elongation	CELLULAR PROCESSES AND SIGNALING	D	Cell cycle control, cell division, chromosome partitioning
IFM89_013065	At1g62660	1.03e-242	KOG0228	Beta-fructofuranosidase (invertase)	METABOLISM	G	Carbohydrate transport and metabolism
IFM89_020746	At3g14460	9.48e-20	KOG4658	Apoptotic ATPase	CELLULAR PROCESSES AND SIGNALING	T	Signal transduction mechanisms
IFM89_013670	At2g42790	2.87e-298	KOG2617	Citrate synthase	METABOLISM	C	Energy production and conversion
IFM89_029773	At3g09270	1.35e-67	KOG0406	Glutathione S-transferase	CELLULAR PROCESSES AND SIGNALING	O	Posttranslational modification, protein turnover, chaperones
IFM89_031445	At2g29680	4.64e-190	KOG2227	Pre-initiation complex, subunit CDC6, AAA+ superfamily ATPase	INFORMATION STORAGE AND PROCESSING	L	Replication, recombination and repair
IFM89_011603	At1g25530	4.1e-217	KOG1303	Amino acid transporters	METABOLISM	E	Amino acid transport and metabolism
IFM89_016560	At2g35710	7.95e-189	KOG1950	Glycosyl transferase, family 8 - glycogenin	METABOLISM	G	Carbohydrate transport and metabolism
novel.8618	At4g39870	9.62e-15	KOG2372	Oxidation resistance protein	INFORMATION STORAGE AND PROCESSING	L	Replication, recombination and repair
IFM89_020646	At2g45660	5.4e-58	KOG0014	MADS box transcription factor	INFORMATION STORAGE AND PROCESSING	K	Transcription
novel.4200	At1g25430	2.31e-107	KOG1075	FOG: Reverse transcriptase	POORLY CHARACTERIZED	R	General function prediction only
novel.8978	At5g64220	5.41e-11	KOG0520	Uncharacterized conserved protein, contains IPT/TIG domain	POORLY CHARACTERIZED	S	Function unknown
novel.7191	At2g13370	3.22e-10	KOG0384	Chromodomain-helicase DNA-binding protein	INFORMATION STORAGE AND PROCESSING	K	Transcription
IFM89_004784	At5g35200	4.48e-162	KOG0251	Clathrin assembly protein AP180 and related proteins, contain ENTH domain	CELLULAR PROCESSES AND SIGNALING	T	Signal transduction mechanisms
IFM89_007028	At2g39220	8.56e-137	KOG0513	Ca2+-independent phospholipase A2	METABOLISM	I	Lipid transport and metabolism
IFM89_034796	At3g54810	5.09e-55	KOG1601	GATA-4/5/6 transcription factors	INFORMATION STORAGE AND PROCESSING	K	Transcription
IFM89_005667	At1g11600	2.8e-251	KOG0156	Cytochrome P450 CYP2 subfamily	METABOLISM	Q	Secondary metabolites biosynthesis, transport and catabolism
IFM89_025257	At3g14660	1.44e-213	KOG0157	Cytochrome P450 CYP4/CYP19/CYP26 subfamilies	METABOLISM	Q	Secondary metabolites biosynthesis, transport and catabolism
IFM89_036628	At3g53740	1.74e-54	KOG3452	60S ribosomal protein L36	INFORMATION STORAGE AND PROCESSING	J	Translation, ribosomal structure and biogenesis
IFM89_009976	At2g45170	1.34e-64	KOG1654	Microtubule-associated anchor protein involved in autophagy and membrane trafficking	CELLULAR PROCESSES AND SIGNALING	Z	Cytoskeleton
IFM89_011375	At1g27730	3.64e-34	KOG1721	FOG: Zn-finger	POORLY CHARACTERIZED	R	General function prediction only
IFM89_009261	At5g12150	0	KOG4271	Rho-GTPase activating protein	CELLULAR PROCESSES AND SIGNALING	T	Signal transduction mechanisms
IFM89_011780	At1g07570	1.23e-114	KOG1187	Serine/threonine protein kinase	CELLULAR PROCESSES AND SIGNALING	T	Signal transduction mechanisms
IFM89_013989	At4g18290	3.34e-239	KOG0498	K+-channel ERG and related proteins, contain PAS/PAC sensor domain	METABOLISM	P	Inorganic ion transport and metabolism
IFM89_018632	At2g27170	1.01e-28	KOG0964	Structural maintenance of chromosome protein 3 (sister chromatid cohesion complex Cohesin, subunit SMC3)	CELLULAR PROCESSES AND SIGNALING	D	Cell cycle control, cell division, chromosome partitioning
IFM89_017228	At3g20820	5.24e-24	KOG0619	FOG: Leucine rich repeat	POORLY CHARACTERIZED	R	General function prediction only
IFM89_005741	At3g51240	3.75e-201	KOG0143	Iron/ascorbate family oxidoreductases	METABOLISM	Q	Secondary metabolites biosynthesis, transport and catabolism
IFM89_007740	At1g34130	0	KOG2292	Oligosaccharyltransferase, STT3 subunit	CELLULAR PROCESSES AND SIGNALING	O	Posttranslational modification, protein turnover, chaperones
IFM89_036865	At5g04710	3.95e-285	KOG2596	Aminopeptidase I zinc metalloprotease (M18)	METABOLISM	E	Amino acid transport and metabolism
IFM89_037659	At4g19810	9.19e-79	KOG2806	Chitinase	METABOLISM	G	Carbohydrate transport and metabolism
IFM89_039150	At2g30600	1.5e-08	KOG4441	Proteins containing BTB/POZ and Kelch domains, involved in regulatory/signal transduction processes	CELLULAR PROCESSES AND SIGNALING	T	Signal transduction mechanisms
IFM89_018556	At5g20320	1.99e-218	KOG0701	dsRNA-specific nuclease Dicer and related ribonucleases	INFORMATION STORAGE AND PROCESSING	A	RNA processing and modification
novel.3091	At1g54430	2.12e-17	KOG0987	DNA helicase PIF1/RRM3	CELLULAR PROCESSES AND SIGNALING	D	Cell cycle control, cell division, chromosome partitioning
IFM89_021909	At4g28950	6.03e-119	KOG0393	Ras-related small GTPase, Rho type	POORLY CHARACTERIZED	R	General function prediction only
IFM89_026145	At3g49500	0	KOG0988	RNA-directed RNA polymerase QDE-1 required for posttranscriptional gene silencing and RNA interference	INFORMATION STORAGE AND PROCESSING	A	RNA processing and modification
novel.5142	At1g18640	2.17e-14	KOG1615	Phosphoserine phosphatase	METABOLISM	E	Amino acid transport and metabolism
IFM89_004852	At4g39920	4.78e-30	KOG2512	Beta-tubulin folding cofactor C	CELLULAR PROCESSES AND SIGNALING	O	Posttranslational modification, protein turnover, chaperones
IFM89_027927	At3g59920	1.94e-151	KOG1439	RAB proteins geranylgeranyltransferase component A (RAB escort protein)	CELLULAR PROCESSES AND SIGNALING	O	Posttranslational modification, protein turnover, chaperones
novel.8444	At3g07490	2.26e-74	KOG0027	Calmodulin and related proteins (EF-Hand superfamily)	CELLULAR PROCESSES AND SIGNALING	T	Signal transduction mechanisms
IFM89_002972	At5g07290	5.5e-247	KOG4660	Protein Mei2, essential for commitment to meiosis, and related proteins	CELLULAR PROCESSES AND SIGNALING	D	Cell cycle control, cell division, chromosome partitioning
IFM89_029589	At4g12110	2.29e-158	KOG0873	C-4 sterol methyl oxidase	METABOLISM	I	Lipid transport and metabolism
IFM89_010005	At3g49650	1.41e-283	KOG0242	Kinesin-like protein	CELLULAR PROCESSES AND SIGNALING	Z	Cytoskeleton
IFM89_028847	At2g36830	6.62e-141	KOG0223	Aquaporin (major intrinsic protein family)	METABOLISM	G	Carbohydrate transport and metabolism
IFM89_024608	At3g57030	5.97e-82	KOG1520	Predicted alkaloid synthase/Surface mucin Hemomucin	POORLY CHARACTERIZED	R	General function prediction only
IFM89_026035	At5g06770	1.34e-08	KOG1677	CCCH-type Zn-finger protein	POORLY CHARACTERIZED	R	General function prediction only
IFM89_036915	At4g04910	5.71e-40	KOG0741	AAA+-type ATPase	CELLULAR PROCESSES AND SIGNALING	O	Posttranslational modification, protein turnover, chaperones
IFM89_003839	At3g01120	2.57e-232	KOG0053	Cystathionine beta-lyases/cystathionine gamma-synthases	METABOLISM	E	Amino acid transport and metabolism
IFM89_009811	At1g77660	1.02e-39	KOG0231	Junctional membrane complex protein Junctophilin and related MORN repeat proteins	POORLY CHARACTERIZED	R	General function prediction only
novel.1761	At1g17890	2.18e-50	KOG1431	GDP-L-fucose synthetase	METABOLISM	G	Carbohydrate transport and metabolism
IFM89_027275	At5g22920	4.09e-108	KOG1940	Zn-finger protein	POORLY CHARACTERIZED	R	General function prediction only
IFM89_019906	At5g48570	6.81e-39	KOG0543	FKBP-type peptidyl-prolyl cis-trans isomerase	CELLULAR PROCESSES AND SIGNALING	O	Posttranslational modification, protein turnover, chaperones
IFM89_038226	At4g29810	4.18e-171	KOG0581	Mitogen-activated protein kinase kinase (MAP2K)	CELLULAR PROCESSES AND SIGNALING	T	Signal transduction mechanisms
IFM89_018020	At1g76680	1.05e-162	KOG0134	NADH:flavin oxidoreductase/12-oxophytodienoate reductase	METABOLISM	C	Energy production and conversion
IFM89_020233	At4g36220	8.37e-90	KOG0156	Cytochrome P450 CYP2 subfamily	METABOLISM	Q	Secondary metabolites biosynthesis, transport and catabolism
IFM89_029376	At3g16640	5.58e-97	KOG1727	Microtubule-binding protein (translationally controlled tumor protein)	CELLULAR PROCESSES AND SIGNALING	D	Cell cycle control, cell division, chromosome partitioning
IFM89_008835	At2g28760	2.8e-176	KOG1429	dTDP-glucose 4-6-dehydratase/UDP-glucuronic acid decarboxylase	METABOLISM	G	Carbohydrate transport and metabolism
IFM89_009894	At5g59610	9.15e-09	KOG0714	Molecular chaperone (DnaJ superfamily)	CELLULAR PROCESSES AND SIGNALING	O	Posttranslational modification, protein turnover, chaperones
IFM89_017363	At3g10310	6.53e-253	KOG0239	Kinesin (KAR3 subfamily)	CELLULAR PROCESSES AND SIGNALING	Z	Cytoskeleton
IFM89_004160	At2g38080	1.91e-102	KOG1263	Multicopper oxidases	METABOLISM	Q	Secondary metabolites biosynthesis, transport and catabolism
IFM89_005226	At2g46760	4.55e-287	KOG4730	D-arabinono-1, 4-lactone oxidase	CELLULAR PROCESSES AND SIGNALING	V	Defense mechanisms
IFM89_025154	At5g60440	2.39e-34	KOG0014	MADS box transcription factor	INFORMATION STORAGE AND PROCESSING	K	Transcription
novel.3542	At2g22350	2.11e-12	KOG1075	FOG: Reverse transcriptase	POORLY CHARACTERIZED	R	General function prediction only
IFM89_031331	At1g26800	7.92e-35	KOG0800	FOG: Predicted E3 ubiquitin ligase	CELLULAR PROCESSES AND SIGNALING	O	Posttranslational modification, protein turnover, chaperones
IFM89_031313	At4g18910	1.48e-39	KOG0223	Aquaporin (major intrinsic protein family)	METABOLISM	G	Carbohydrate transport and metabolism
novel.2237	At4g39120	1.1e-08	KOG2951	Inositol monophosphatase	METABOLISM	G	Carbohydrate transport and metabolism
novel.2801	At1g16900_2	4.18e-52	KOG2515	Mannosyltransferase	CELLULAR PROCESSES AND SIGNALING	M	Cell wall/membrane/envelope biogenesis
IFM89_037594	At5g61060	2.22e-33	KOG1343	Histone deacetylase complex, catalytic component HDA1	INFORMATION STORAGE AND PROCESSING	B	Chromatin structure and dynamics
IFM89_015843	At5g18610	8.76e-271	KOG1187	Serine/threonine protein kinase	CELLULAR PROCESSES AND SIGNALING	T	Signal transduction mechanisms
IFM89_028132	At1g04860	2.56e-136	KOG1873	Ubiquitin-specific protease	CELLULAR PROCESSES AND SIGNALING	O	Posttranslational modification, protein turnover, chaperones
novel.9009	At4g25960	2.17e-112	KOG0055	Multidrug/pheromone exporter, ABC superfamily	METABOLISM	Q	Secondary metabolites biosynthesis, transport and catabolism
IFM89_007494	At4g19210	0	KOG0063	RNAse L inhibitor, ABC superfamily	INFORMATION STORAGE AND PROCESSING	A	RNA processing and modification
IFM89_032862	At5g06660	2.34e-70	KOG3312	Predicted membrane protein	POORLY CHARACTERIZED	S	Function unknown
IFM89_029665	At4g00990	1.9e-164	KOG1356	Putative transcription factor 5qNCA, contains JmjC domain	INFORMATION STORAGE AND PROCESSING	K	Transcription
IFM89_000358	At4g14220	1.19e-40	KOG0800	FOG: Predicted E3 ubiquitin ligase	CELLULAR PROCESSES AND SIGNALING	O	Posttranslational modification, protein turnover, chaperones
IFM89_002755	At5g18500	1.93e-60	KOG1187	Serine/threonine protein kinase	CELLULAR PROCESSES AND SIGNALING	T	Signal transduction mechanisms
IFM89_001772	At4g26180	1.08e-159	KOG0752	Mitochondrial solute carrier protein	METABOLISM	C	Energy production and conversion
IFM89_000192	At5g24810	0	KOG1235	Predicted unusual protein kinase	POORLY CHARACTERIZED	R	General function prediction only
IFM89_002568	At4g25200	3.83e-54	KOG0710	Molecular chaperone (small heat-shock protein Hsp26/Hsp42)	CELLULAR PROCESSES AND SIGNALING	O	Posttranslational modification, protein turnover, chaperones
IFM89_005210	At3g57060	0	KOG0414	Chromosome condensation complex Condensin, subunit D2	INFORMATION STORAGE AND PROCESSING	B	Chromatin structure and dynamics
novel.8184	At2g25300	1.02e-35	KOG2288	Galactosyltransferases	METABOLISM	G	Carbohydrate transport and metabolism
novel.8337	At5g05010	3.61e-35	KOG2635	Medium subunit of clathrin adaptor complex	CELLULAR PROCESSES AND SIGNALING	U	Intracellular trafficking, secretion, and vesicular transport
IFM89_004950	At4g29410	1.03e-14	KOG3412	60S ribosomal protein L28	INFORMATION STORAGE AND PROCESSING	J	Translation, ribosomal structure and biogenesis
novel.6437	At1g73030	1.96e-87	KOG3232	Vacuolar assembly/sorting protein DID2	CELLULAR PROCESSES AND SIGNALING	U	Intracellular trafficking, secretion, and vesicular transport
IFM89_013839	At2g02390	2.03e-94	KOG0868	Glutathione S-transferase	CELLULAR PROCESSES AND SIGNALING	O	Posttranslational modification, protein turnover, chaperones
IFM89_026418	At4g27740	2.94e-54	KOG3399	Predicted Yippee-type zinc-binding protein	POORLY CHARACTERIZED	R	General function prediction only
IFM89_001736	At3g23780	9.54e-280	KOG0214	RNA polymerase II, second largest subunit	INFORMATION STORAGE AND PROCESSING	K	Transcription
IFM89_029622	Hs17463505	2.67e-11	KOG3245	Uncharacterized conserved protein	POORLY CHARACTERIZED	S	Function unknown
IFM89_035997	At1g10580	0	KOG0282	mRNA splicing factor	POORLY CHARACTERIZED	S	Function unknown
novel.7391	At1g47910	7.7e-55	KOG1075	FOG: Reverse transcriptase	POORLY CHARACTERIZED	R	General function prediction only
IFM89_011592	At4g27580	3.57e-53	KOG2620	Prohibitins and stomatins of the PID superfamily	METABOLISM	C	Energy production and conversion
IFM89_013945	At2g41760	2.79e-88	KOG3261	Uncharacterized conserved protein	POORLY CHARACTERIZED	S	Function unknown
IFM89_021165	At3g56340	2.9e-68	KOG1768	40s ribosomal protein S26	INFORMATION STORAGE AND PROCESSING	J	Translation, ribosomal structure and biogenesis
IFM89_010188	At2g16920	2.52e-142	KOG0895	Ubiquitin-conjugating enzyme	CELLULAR PROCESSES AND SIGNALING	O	Posttranslational modification, protein turnover, chaperones
IFM89_032579	At3g63470	7.92e-108	KOG1282	Serine carboxypeptidases (lysosomal cathepsin A)	CELLULAR PROCESSES AND SIGNALING	O	Posttranslational modification, protein turnover, chaperones
IFM89_018995	At4g35640	4.38e-36	KOG4750	Serine O-acetyltransferase	METABOLISM	E	Amino acid transport and metabolism
IFM89_002302	At1g03060_1	0	KOG1788	Uncharacterized conserved protein	POORLY CHARACTERIZED	S	Function unknown
IFM89_029172	At1g60690	2.11e-192	KOG1575	Voltage-gated shaker-like K+ channel, subunit beta/KCNAB	METABOLISM	C	Energy production and conversion
IFM89_002355	At2g14660	3.45e-66	KOG3383	Uncharacterized conserved protein	POORLY CHARACTERIZED	S	Function unknown
IFM89_036841	At3g51730	4.46e-62	KOG1340	Prosaposin	METABOLISM	I	Lipid transport and metabolism
novel.338	At3g03790	1.17e-44	KOG1426	FOG: RCC1 domain	POORLY CHARACTERIZED	S	Function unknown
IFM89_009873	At1g34430	2.07e-156	KOG0557	Dihydrolipoamide acetyltransferase	METABOLISM	C	Energy production and conversion
IFM89_010359	At5g63830	9.88e-107	KOG4317	Predicted Zn-finger protein	POORLY CHARACTERIZED	S	Function unknown
IFM89_038079	At2g43460	1.28e-37	KOG3499	60S ribosomal protein L38	INFORMATION STORAGE AND PROCESSING	J	Translation, ribosomal structure and biogenesis
IFM89_018473	At3g51370	3.87e-73	KOG0700	Protein phosphatase 2C/pyruvate dehydrogenase (lipoamide) phosphatase	CELLULAR PROCESSES AND SIGNALING	T	Signal transduction mechanisms
IFM89_024722	At3g44110	1.23e-148	KOG0712	Molecular chaperone (DnaJ superfamily)	CELLULAR PROCESSES AND SIGNALING	O	Posttranslational modification, protein turnover, chaperones
IFM89_007795	At2g02070	1.04e-113	KOG1721	FOG: Zn-finger	POORLY CHARACTERIZED	R	General function prediction only
IFM89_030157	At3g15350	8.55e-209	KOG0799	Branching enzyme	METABOLISM	G	Carbohydrate transport and metabolism
IFM89_016772	At2g47240	0	KOG1256	Long-chain acyl-CoA synthetases (AMP-forming)	METABOLISM	I	Lipid transport and metabolism
IFM89_008480	At3g54110	1.07e-173	KOG0753	Mitochondrial fatty acid anion carrier protein/Uncoupling protein	METABOLISM	C	Energy production and conversion
IFM89_023903	At3g24310	4.5e-82	KOG0048	Transcription factor, Myb superfamily	INFORMATION STORAGE AND PROCESSING	K	Transcription
IFM89_010434	At4g24520	0	KOG1158	NADP/FAD dependent oxidoreductase	METABOLISM	C	Energy production and conversion
IFM89_001362	At4g32810	6.13e-191	KOG1285	Beta, beta-carotene 15,15'-dioxygenase and related enzymes	METABOLISM	Q	Secondary metabolites biosynthesis, transport and catabolism
IFM89_010073	At1g47670	0	KOG1303	Amino acid transporters	METABOLISM	E	Amino acid transport and metabolism
novel.8029	At4g22720	4.91e-22	KOG2708	Predicted metalloprotease with chaperone activity (RNAse H/HSP70 fold)	CELLULAR PROCESSES AND SIGNALING	O	Posttranslational modification, protein turnover, chaperones
IFM89_037582	At2g13370	0	KOG0384	Chromodomain-helicase DNA-binding protein	INFORMATION STORAGE AND PROCESSING	K	Transcription
IFM89_029834	Hs18594496	2.23e-25	KOG4741	Uncharacterized conserved protein	POORLY CHARACTERIZED	S	Function unknown
IFM89_036532	At2g27550	4.46e-90	KOG3346	Phosphatidylethanolamine binding protein	POORLY CHARACTERIZED	R	General function prediction only
IFM89_034062	At5g66120	5.33e-235	KOG0692	Pentafunctional AROM protein	METABOLISM	E	Amino acid transport and metabolism
IFM89_003182	At5g54160	7.31e-137	KOG3178	Hydroxyindole-O-methyltransferase and related SAM-dependent methyltransferases	POORLY CHARACTERIZED	R	General function prediction only
novel.7037	At4g28390	8.9e-07	KOG0749	Mitochondrial ADP/ATP carrier proteins	METABOLISM	C	Energy production and conversion
IFM89_035527	At1g51130	8.26e-57	KOG2866	Uncharacterized conserved protein	POORLY CHARACTERIZED	S	Function unknown
IFM89_035686	At1g04820	0	KOG1376	Alpha tubulin	CELLULAR PROCESSES AND SIGNALING	Z	Cytoskeleton
IFM89_003678	At2g15690_2	3.77e-130	KOG4197	FOG: PPR repeat	POORLY CHARACTERIZED	R	General function prediction only
IFM89_004456	At3g48700	3.62e-63	KOG1515	Arylacetamide deacetylase	CELLULAR PROCESSES AND SIGNALING	V	Defense mechanisms
novel.4475	At1g09330	1.86e-06	KOG3195	Uncharacterized membrane protein NPD008/CGI-148	POORLY CHARACTERIZED	R	General function prediction only
IFM89_029165	At1g60690	2.59e-186	KOG1575	Voltage-gated shaker-like K+ channel, subunit beta/KCNAB	METABOLISM	C	Energy production and conversion
IFM89_036065	At3g05630	0	KOG1329	Phospholipase D1	METABOLISM	I	Lipid transport and metabolism
IFM89_010439	At3g60180	1.38e-80	KOG3079	Uridylate kinase/adenylate kinase	METABOLISM	F	Nucleotide transport and metabolism
IFM89_025800	At1g07010	2.65e-151	KOG0374	Serine/threonine specific protein phosphatase PP1, catalytic subunit	CELLULAR PROCESSES AND SIGNALING	T	Signal transduction mechanisms
IFM89_038552	At5g10940	0	KOG1310	WD40 repeat protein	POORLY CHARACTERIZED	R	General function prediction only
IFM89_029405	At5g67590	6.18e-16	KOG3389	NADH:ubiquinone oxidoreductase, NDUFS4/18 kDa subunit	METABOLISM	C	Energy production and conversion
IFM89_017165	At4g35300	5.63e-101	KOG0254	Predicted transporter (major facilitator superfamily)	POORLY CHARACTERIZED	R	General function prediction only
IFM89_029788	At3g09270	4.72e-69	KOG0406	Glutathione S-transferase	CELLULAR PROCESSES AND SIGNALING	O	Posttranslational modification, protein turnover, chaperones
IFM89_034197	At2g07690	0	KOG0481	DNA replication licensing factor, MCM5 component	INFORMATION STORAGE AND PROCESSING	L	Replication, recombination and repair
IFM89_003485	At5g36110	7.12e-110	KOG0157	Cytochrome P450 CYP4/CYP19/CYP26 subfamilies	METABOLISM	Q	Secondary metabolites biosynthesis, transport and catabolism
IFM89_001570	At3g22690	1.11e-10	KOG4197	FOG: PPR repeat	POORLY CHARACTERIZED	R	General function prediction only
novel.8313	At1g59610	1.8e-44	KOG0446	Vacuolar sorting protein VPS1, dynamin, and related proteins	CELLULAR PROCESSES AND SIGNALING	U	Intracellular trafficking, secretion, and vesicular transport
IFM89_033646	At2g18110	2.64e-92	KOG1668	Elongation factor 1 beta/delta chain	INFORMATION STORAGE AND PROCESSING	K	Transcription
IFM89_015562	At2g39840	1.9e-174	KOG0374	Serine/threonine specific protein phosphatase PP1, catalytic subunit	CELLULAR PROCESSES AND SIGNALING	T	Signal transduction mechanisms
novel.7906	At3g48250	4.31e-07	KOG4197	FOG: PPR repeat	POORLY CHARACTERIZED	R	General function prediction only
IFM89_022009	At1g36050	1.33e-179	KOG2667	COPII vesicle protein	CELLULAR PROCESSES AND SIGNALING	U	Intracellular trafficking, secretion, and vesicular transport
IFM89_032048	At3g19000	2.07e-156	KOG0143	Iron/ascorbate family oxidoreductases	METABOLISM	Q	Secondary metabolites biosynthesis, transport and catabolism
IFM89_038604	At3g58030	6.47e-34	KOG0823	Predicted E3 ubiquitin ligase	CELLULAR PROCESSES AND SIGNALING	O	Posttranslational modification, protein turnover, chaperones
IFM89_004833	At3g02580	3.59e-162	KOG0872	Sterol C5 desaturase	METABOLISM	I	Lipid transport and metabolism
IFM89_025902	At2g01840	7.36e-08	KOG1075	FOG: Reverse transcriptase	POORLY CHARACTERIZED	R	General function prediction only
IFM89_019206	At2g25620	3.13e-77	KOG0698	Serine/threonine protein phosphatase	CELLULAR PROCESSES AND SIGNALING	T	Signal transduction mechanisms
novel.1855	At4g38110	1.76e-22	KOG4535	HEAT and armadillo repeat-containing protein	POORLY CHARACTERIZED	R	General function prediction only
IFM89_005724	At2g21170	7.89e-143	KOG1643	Triosephosphate isomerase	METABOLISM	G	Carbohydrate transport and metabolism
IFM89_019112	At1g78300	1.1e-65	KOG0841	Multifunctional chaperone (14-3-3 family)	CELLULAR PROCESSES AND SIGNALING	O	Posttranslational modification, protein turnover, chaperones
IFM89_038058	At5g47690	0	KOG1525	Sister chromatid cohesion complex Cohesin, subunit PDS5	CELLULAR PROCESSES AND SIGNALING	D	Cell cycle control, cell division, chromosome partitioning
IFM89_015667	At1g74320	4.68e-58	KOG2686	Choline kinase	CELLULAR PROCESSES AND SIGNALING	M	Cell wall/membrane/envelope biogenesis
IFM89_016385	At3g12050	7.29e-173	KOG2936	Uncharacterized conserved protein	POORLY CHARACTERIZED	S	Function unknown
novel.445	At1g60200	2.96e-15	KOG2253	U1 snRNP complex, subunit SNU71 and related PWI-motif proteins	INFORMATION STORAGE AND PROCESSING	A	RNA processing and modification
IFM89_022863	At5g19440	5.67e-166	KOG1502	Flavonol reductase/cinnamoyl-CoA reductase	CELLULAR PROCESSES AND SIGNALING	V	Defense mechanisms
novel.8696	At1g01140	1.57e-19	KOG0583	Serine/threonine protein kinase	CELLULAR PROCESSES AND SIGNALING	T	Signal transduction mechanisms
IFM89_029477	At1g70170	6.04e-133	KOG1565	Gelatinase A and related matrix metalloproteases	CELLULAR PROCESSES AND SIGNALING	O	Posttranslational modification, protein turnover, chaperones
IFM89_022642	At2g29120	3.97e-134	KOG1052	Glutamate-gated kainate-type ion channel receptor subunit GluR5 and related subunits	METABOLISM	P	Inorganic ion transport and metabolism
IFM89_000466	At1g76280	5.12e-22	KOG4197	FOG: PPR repeat	POORLY CHARACTERIZED	R	General function prediction only
IFM89_013610	At5g10810	4.64e-09	KOG1766	Enhancer of rudimentary	POORLY CHARACTERIZED	R	General function prediction only
IFM89_020346	At3g14460	2.11e-16	KOG4658	Apoptotic ATPase	CELLULAR PROCESSES AND SIGNALING	T	Signal transduction mechanisms
IFM89_017364	At5g13800	3.84e-196	KOG1454	Predicted hydrolase/acyltransferase (alpha/beta hydrolase superfamily)	POORLY CHARACTERIZED	R	General function prediction only
novel.8447	At3g03310	2.55e-25	KOG2369	Lecithin:cholesterol acyltransferase (LCAT)/Acyl-ceramide synthase	METABOLISM	I	Lipid transport and metabolism
novel.1892	At2g36160	5.12e-22	KOG0407	40S ribosomal protein S14	INFORMATION STORAGE AND PROCESSING	J	Translation, ribosomal structure and biogenesis
IFM89_013375	At1g76730	7.07e-161	KOG4410	5-formyltetrahydrofolate cyclo-ligase	METABOLISM	H	Coenzyme transport and metabolism
IFM89_012789	At1g47240	7.15e-27	KOG1291	Mn2+ and Fe2+ transporters of the NRAMP family	METABOLISM	P	Inorganic ion transport and metabolism
IFM89_003036	At2g01910	3.39e-251	KOG4302	Microtubule-associated protein essential for anaphase spindle elongation	CELLULAR PROCESSES AND SIGNALING	D	Cell cycle control, cell division, chromosome partitioning
IFM89_015505	At3g20720	0	KOG2955	Uncharacterized conserved protein	POORLY CHARACTERIZED	S	Function unknown
IFM89_012896	At5g58490	1.59e-111	KOG1502	Flavonol reductase/cinnamoyl-CoA reductase	CELLULAR PROCESSES AND SIGNALING	V	Defense mechanisms
IFM89_015424	At2g30410	4.15e-32	KOG3470	Beta-tubulin folding cofactor A	CELLULAR PROCESSES AND SIGNALING	O	Posttranslational modification, protein turnover, chaperones
IFM89_008430	At2g45660	8.92e-60	KOG0014	MADS box transcription factor	INFORMATION STORAGE AND PROCESSING	K	Transcription
IFM89_027599	At2g17020	1.62e-125	KOG1947	Leucine rich repeat proteins, some proteins contain F-box	POORLY CHARACTERIZED	R	General function prediction only
novel.8751	At2g15480	3.07e-103	KOG1192	UDP-glucuronosyl and UDP-glucosyl transferase	METABOLISM	G	Carbohydrate transport and metabolism
IFM89_039421	At1g64110	0	KOG0737	AAA+-type ATPase	CELLULAR PROCESSES AND SIGNALING	O	Posttranslational modification, protein turnover, chaperones
IFM89_039125	At4g28080	0	KOG1839	Uncharacterized protein CLU1/cluA/TIF31 involved in mitochondrial morphology/distribution, also found associated with eIF-3	POORLY CHARACTERIZED	R	General function prediction only
IFM89_032580	At3g63470	3.06e-28	KOG1282	Serine carboxypeptidases (lysosomal cathepsin A)	CELLULAR PROCESSES AND SIGNALING	O	Posttranslational modification, protein turnover, chaperones
IFM89_035012	At4g35300	0	KOG0254	Predicted transporter (major facilitator superfamily)	POORLY CHARACTERIZED	R	General function prediction only
IFM89_020002	At5g27840	2.33e-28	KOG0374	Serine/threonine specific protein phosphatase PP1, catalytic subunit	CELLULAR PROCESSES AND SIGNALING	T	Signal transduction mechanisms
IFM89_012463	At5g04600	2.51e-38	KOG4208	Nucleolar RNA-binding protein NIFK	POORLY CHARACTERIZED	R	General function prediction only
IFM89_003669	At5g47820	0	KOG0244	Kinesin-like protein	CELLULAR PROCESSES AND SIGNALING	Z	Cytoskeleton
IFM89_025178	At5g63620	1.12e-175	KOG0022	Alcohol dehydrogenase, class III	METABOLISM	Q	Secondary metabolites biosynthesis, transport and catabolism
IFM89_020440	At1g32060	1.76e-235	KOG4203	Armadillo/beta-Catenin/plakoglobin	CELLULAR PROCESSES AND SIGNALING	T	Signal transduction mechanisms
IFM89_038532	At1g63980	4.84e-98	KOG2809	Telomerase elongation inhibitor/RNA maturation protein PINX1	INFORMATION STORAGE AND PROCESSING	A	RNA processing and modification
IFM89_024270	At5g26010	2e-110	KOG0698	Serine/threonine protein phosphatase	CELLULAR PROCESSES AND SIGNALING	T	Signal transduction mechanisms
IFM89_036638	At3g63400	8.7e-27	KOG0865	Cyclophilin type peptidyl-prolyl cis-trans isomerase	CELLULAR PROCESSES AND SIGNALING	O	Posttranslational modification, protein turnover, chaperones
IFM89_010630	At5g49480	2.57e-36	KOG0027	Calmodulin and related proteins (EF-Hand superfamily)	CELLULAR PROCESSES AND SIGNALING	T	Signal transduction mechanisms
IFM89_017705	At4g36530	2.62e-185	KOG1454	Predicted hydrolase/acyltransferase (alpha/beta hydrolase superfamily)	POORLY CHARACTERIZED	R	General function prediction only
novel.8167	At4g12620	2.45e-68	KOG1514	Origin recognition complex, subunit 1, and related proteins	INFORMATION STORAGE AND PROCESSING	L	Replication, recombination and repair
IFM89_030918	At3g44590	2.58e-25	KOG3449	60S acidic ribosomal protein P2	INFORMATION STORAGE AND PROCESSING	J	Translation, ribosomal structure and biogenesis
IFM89_018242	At4g28950	4.45e-124	KOG0393	Ras-related small GTPase, Rho type	POORLY CHARACTERIZED	R	General function prediction only
IFM89_029920	At5g02100	2.05e-276	KOG1737	Oxysterol-binding protein	METABOLISM	I	Lipid transport and metabolism
IFM89_026221	At3g14470	2.18e-23	KOG4658	Apoptotic ATPase	CELLULAR PROCESSES AND SIGNALING	T	Signal transduction mechanisms
IFM89_012559	At2g42500	4.61e-224	KOG0371	Serine/threonine protein phosphatase 2A, catalytic subunit	CELLULAR PROCESSES AND SIGNALING	T	Signal transduction mechanisms
IFM89_038850	At3g14460	4.63e-14	KOG4658	Apoptotic ATPase	CELLULAR PROCESSES AND SIGNALING	T	Signal transduction mechanisms
IFM89_039950	At1g32210	1.33e-42	KOG1746	Defender against cell death protein/oligosaccharyltransferase, epsilon subunit	CELLULAR PROCESSES AND SIGNALING	D	Cell cycle control, cell division, chromosome partitioning
IFM89_022094	At3g45680	6.06e-196	KOG1237	H+/oligopeptide symporter	METABOLISM	E	Amino acid transport and metabolism
IFM89_019346	At1g74320	7.97e-170	KOG2686	Choline kinase	CELLULAR PROCESSES AND SIGNALING	M	Cell wall/membrane/envelope biogenesis
IFM89_039203	At3g56190	5.57e-62	KOG1586	Protein required for fusion of vesicles in vesicular transport, alpha-SNAP	CELLULAR PROCESSES AND SIGNALING	U	Intracellular trafficking, secretion, and vesicular transport
IFM89_018875	At5g02810	6.63e-57	KOG1601	GATA-4/5/6 transcription factors	INFORMATION STORAGE AND PROCESSING	K	Transcription
IFM89_017648	At3g45070	1.1e-86	KOG1584	Sulfotransferase	POORLY CHARACTERIZED	R	General function prediction only
IFM89_024388	At1g23800	3.46e-186	KOG2450	Aldehyde dehydrogenase	METABOLISM	C	Energy production and conversion
IFM89_016256	At5g48390_2	8.96e-39	KOG4814	Uncharacterized conserved protein	POORLY CHARACTERIZED	S	Function unknown
IFM89_031135	At2g47610	8.34e-156	KOG3166	60S ribosomal protein L7A	INFORMATION STORAGE AND PROCESSING	J	Translation, ribosomal structure and biogenesis
novel.3842	At2g20340	8.98e-34	KOG0628	Aromatic-L-amino-acid/L-histidine decarboxylase	METABOLISM	E	Amino acid transport and metabolism
IFM89_035673	At1g10030	6.15e-62	KOG3455	Predicted membrane protein	POORLY CHARACTERIZED	S	Function unknown
IFM89_031394	At2g36230	3.34e-142	KOG3055	Phosphoribosylformimino-5-aminoimidazole carboxamide ribonucleotide (ProFAR) isomerase	METABOLISM	E	Amino acid transport and metabolism
IFM89_036153	At1g06490	0	KOG0916	1,3-beta-glucan synthase/callose synthase catalytic subunit	CELLULAR PROCESSES AND SIGNALING	M	Cell wall/membrane/envelope biogenesis
IFM89_022892	At2g44480	1.52e-81	KOG0626	Beta-glucosidase, lactase phlorizinhydrolase, and related proteins	METABOLISM	G	Carbohydrate transport and metabolism
IFM89_014137	At5g63830	1.31e-112	KOG4317	Predicted Zn-finger protein	POORLY CHARACTERIZED	S	Function unknown
IFM89_029814	At1g69520	7.24e-59	KOG4300	Predicted methyltransferase	POORLY CHARACTERIZED	R	General function prediction only
IFM89_031500	At2g39940	3.2e-259	KOG1947	Leucine rich repeat proteins, some proteins contain F-box	POORLY CHARACTERIZED	R	General function prediction only
IFM89_000176	At3g20240	2.56e-165	KOG0752	Mitochondrial solute carrier protein	METABOLISM	C	Energy production and conversion
IFM89_019030	At5g05380	2.21e-73	KOG3142	Prenylated rab acceptor 1	CELLULAR PROCESSES AND SIGNALING	U	Intracellular trafficking, secretion, and vesicular transport
IFM89_006861	At3g10950	6.02e-15	KOG0402	60S ribosomal protein L37	INFORMATION STORAGE AND PROCESSING	J	Translation, ribosomal structure and biogenesis
IFM89_024801	At1g76550	0	KOG2440	Pyrophosphate-dependent phosphofructo-1-kinase	METABOLISM	G	Carbohydrate transport and metabolism
IFM89_028539	At2g19720	8.76e-64	KOG1754	40S ribosomal protein S15/S22	INFORMATION STORAGE AND PROCESSING	J	Translation, ribosomal structure and biogenesis
IFM89_006103	At3g59110	2.94e-191	KOG1187	Serine/threonine protein kinase	CELLULAR PROCESSES AND SIGNALING	T	Signal transduction mechanisms
IFM89_007687	At5g08580	7.48e-146	KOG4223	Reticulocalbin, calumenin, DNA supercoiling factor, and related Ca2+-binding proteins of the CREC family (EF-Hand protein superfamily)	CELLULAR PROCESSES AND SIGNALING	T	Signal transduction mechanisms
IFM89_005861	At1g13440	1.72e-172	KOG0657	Glyceraldehyde 3-phosphate dehydrogenase	METABOLISM	G	Carbohydrate transport and metabolism
IFM89_037483	At1g20690_2	2.91e-22	KOG0381	HMG box-containing protein	POORLY CHARACTERIZED	R	General function prediction only
IFM89_034983	Hs7705433	7.43e-141	KOG3677	RNA polymerase I-associated factor - PAF67	INFORMATION STORAGE AND PROCESSING	J	Translation, ribosomal structure and biogenesis
IFM89_005912	At1g70060	0	KOG4204	Histone deacetylase complex, SIN3 component	INFORMATION STORAGE AND PROCESSING	B	Chromatin structure and dynamics
IFM89_023835	At5g40010	2.47e-190	KOG0743	AAA+-type ATPase	CELLULAR PROCESSES AND SIGNALING	O	Posttranslational modification, protein turnover, chaperones
IFM89_039304	At1g07270	1.96e-10	KOG2227	Pre-initiation complex, subunit CDC6, AAA+ superfamily ATPase	INFORMATION STORAGE AND PROCESSING	L	Replication, recombination and repair
IFM89_039567	At3g12680	6.56e-65	KOG1677	CCCH-type Zn-finger protein	POORLY CHARACTERIZED	R	General function prediction only
IFM89_017491	At1g77180	4.79e-269	KOG2441	mRNA splicing factor/probable chromatin binding snw family nuclear protein	INFORMATION STORAGE AND PROCESSING	A	RNA processing and modification
IFM89_027476	At3g28860	0	KOG0055	Multidrug/pheromone exporter, ABC superfamily	METABOLISM	Q	Secondary metabolites biosynthesis, transport and catabolism
IFM89_038197	At4g08320	7.47e-15	KOG0553	TPR repeat-containing protein	POORLY CHARACTERIZED	R	General function prediction only
IFM89_026240	At2g47410	1.55e-115	KOG0644	Uncharacterized conserved protein, contains WD40 repeat and BROMO domains	POORLY CHARACTERIZED	R	General function prediction only
IFM89_034468	At5g61220	5.03e-28	KOG3801	Uncharacterized conserved protein BCN92	INFORMATION STORAGE AND PROCESSING	A	RNA processing and modification
IFM89_029155	At5g67270	9.25e-127	KOG3000	Microtubule-binding protein involved in cell cycle control	CELLULAR PROCESSES AND SIGNALING	D	Cell cycle control, cell division, chromosome partitioning
IFM89_020537	At1g02270	1.31e-151	KOG2338	Transcriptional effector CCR4-related protein	INFORMATION STORAGE AND PROCESSING	K	Transcription
IFM89_035699	At2g20060	1.99e-137	KOG1624	Mitochondrial/chloroplast ribosomal protein L4	INFORMATION STORAGE AND PROCESSING	J	Translation, ribosomal structure and biogenesis
IFM89_021491	At3g14470	1.34e-98	KOG4658	Apoptotic ATPase	CELLULAR PROCESSES AND SIGNALING	T	Signal transduction mechanisms
IFM89_029144	At5g05540	4.62e-15	KOG2248	3'-5' exonuclease	INFORMATION STORAGE AND PROCESSING	L	Replication, recombination and repair
IFM89_017660	At5g53090	4.63e-72	KOG1208	Dehydrogenases with different specificities (related to short-chain alcohol dehydrogenases)	METABOLISM	Q	Secondary metabolites biosynthesis, transport and catabolism
IFM89_027972	At1g73020	4.41e-165	KOG2513	Protein required for meiotic chromosome segregation	CELLULAR PROCESSES AND SIGNALING	D	Cell cycle control, cell division, chromosome partitioning
IFM89_026125	At5g35970	0	KOG1803	DNA helicase	INFORMATION STORAGE AND PROCESSING	L	Replication, recombination and repair
novel.5698	At3g56120	3.05e-21	KOG2078	tRNA modification enzyme	INFORMATION STORAGE AND PROCESSING	A	RNA processing and modification
IFM89_039249	At1g44170	4.22e-129	KOG2456	Aldehyde dehydrogenase	METABOLISM	C	Energy production and conversion
IFM89_035164	At5g08380	8.55e-107	KOG2366	Alpha-D-galactosidase (melibiase)	METABOLISM	G	Carbohydrate transport and metabolism
IFM89_010532	At2g32440	1.15e-56	KOG0157	Cytochrome P450 CYP4/CYP19/CYP26 subfamilies	METABOLISM	Q	Secondary metabolites biosynthesis, transport and catabolism
IFM89_035775	At1g32130	5.79e-148	KOG1793	Uncharacterized conserved protein	POORLY CHARACTERIZED	S	Function unknown
IFM89_024449	At2g41900	9.32e-105	KOG1595	CCCH-type Zn-finger protein	POORLY CHARACTERIZED	R	General function prediction only
IFM89_022808	At4g14970	4.51e-47	KOG4712	Uncharacterized conserved protein	POORLY CHARACTERIZED	S	Function unknown
IFM89_008767	At5g54250	0	KOG0498	K+-channel ERG and related proteins, contain PAS/PAC sensor domain	METABOLISM	P	Inorganic ion transport and metabolism
IFM89_024754	At2g32950_1	1.15e-15	KOG0297	TNF receptor-associated factor	CELLULAR PROCESSES AND SIGNALING	T	Signal transduction mechanisms
IFM89_032278	At4g04610_2	2.04e-59	KOG0191	Thioredoxin/protein disulfide isomerase	CELLULAR PROCESSES AND SIGNALING	O	Posttranslational modification, protein turnover, chaperones
IFM89_013317	At3g09220	3.77e-240	KOG1263	Multicopper oxidases	METABOLISM	Q	Secondary metabolites biosynthesis, transport and catabolism
IFM89_004446	At1g31300	7.45e-123	KOG4561	Uncharacterized conserved protein, contains TBC domain	CELLULAR PROCESSES AND SIGNALING	T	Signal transduction mechanisms
novel.5419	At1g31210	6.89e-65	KOG0017	FOG: Transposon-encoded proteins with TYA, reverse transcriptase, integrase domains in various combinations	POORLY CHARACTERIZED	R	General function prediction only
IFM89_017260	At3g27360	7.81e-82	KOG1745	Histones H3 and H4	INFORMATION STORAGE AND PROCESSING	B	Chromatin structure and dynamics
IFM89_028363	At1g33540	2.48e-76	KOG1282	Serine carboxypeptidases (lysosomal cathepsin A)	CELLULAR PROCESSES AND SIGNALING	O	Posttranslational modification, protein turnover, chaperones
IFM89_022372	At2g45490	1.65e-98	KOG0580	Serine/threonine protein kinase	CELLULAR PROCESSES AND SIGNALING	D	Cell cycle control, cell division, chromosome partitioning
IFM89_036100	At1g55490	4.94e-28	KOG0356	Mitochondrial chaperonin, Cpn60/Hsp60p	CELLULAR PROCESSES AND SIGNALING	O	Posttranslational modification, protein turnover, chaperones
IFM89_003491	At1g31930	2.81e-06	KOG0082	G-protein alpha subunit (small G protein superfamily)	CELLULAR PROCESSES AND SIGNALING	D	Cell cycle control, cell division, chromosome partitioning
IFM89_035140	At3g12280	0	KOG1010	Rb (Retinoblastoma tumor suppressor)-related protein	CELLULAR PROCESSES AND SIGNALING	D	Cell cycle control, cell division, chromosome partitioning
IFM89_033991	At5g66190	2.28e-215	KOG1158	NADP/FAD dependent oxidoreductase	METABOLISM	C	Energy production and conversion
novel.8119	At4g37790	2.92e-52	KOG0483	Transcription factor HEX, contains HOX and HALZ domains	INFORMATION STORAGE AND PROCESSING	K	Transcription
IFM89_001933	At2g33730	0	KOG0333	U5 snRNP-like RNA helicase subunit	INFORMATION STORAGE AND PROCESSING	A	RNA processing and modification
IFM89_005361	At4g14330	2.27e-278	KOG0243	Kinesin-like protein	CELLULAR PROCESSES AND SIGNALING	Z	Cytoskeleton
IFM89_024328	At5g07990	9.21e-128	KOG0156	Cytochrome P450 CYP2 subfamily	METABOLISM	Q	Secondary metabolites biosynthesis, transport and catabolism
IFM89_015779	At5g27700	2.81e-36	KOG3486	40S ribosomal protein S21	INFORMATION STORAGE AND PROCESSING	J	Translation, ribosomal structure and biogenesis
IFM89_023947	At5g51280	0	KOG0341	DEAD-box protein abstrakt	INFORMATION STORAGE AND PROCESSING	A	RNA processing and modification
IFM89_004457	At5g44790	0	KOG0207	Cation transport ATPase	METABOLISM	P	Inorganic ion transport and metabolism
IFM89_020213	At4g39850	0	KOG0060	Long-chain acyl-CoA transporter, ABC superfamily (involved in peroxisome organization and biogenesis)	METABOLISM	I	Lipid transport and metabolism
IFM89_005881	At3g43230	8.08e-53	KOG1843	Uncharacterized conserved protein	POORLY CHARACTERIZED	S	Function unknown
IFM89_005363	At3g20390	8.87e-81	KOG2317	Putative translation initiation inhibitor UK114/IBM1	INFORMATION STORAGE AND PROCESSING	J	Translation, ribosomal structure and biogenesis
IFM89_030819	At4g02670	7.59e-113	KOG1721	FOG: Zn-finger	POORLY CHARACTERIZED	R	General function prediction only
novel.577	At4g34160	3.46e-70	KOG0656	G1/S-specific cyclin D	CELLULAR PROCESSES AND SIGNALING	D	Cell cycle control, cell division, chromosome partitioning
novel.2005	At2g07727	1.25e-40	KOG4663	Cytochrome b	METABOLISM	C	Energy production and conversion
IFM89_002519	At5g23850	2.33e-197	KOG2458	Endoplasmic reticulum protein EP58, contains filamin rod domain and KDEL motif	POORLY CHARACTERIZED	R	General function prediction only
IFM89_012563	At5g44370	1.54e-244	KOG2532	Permease of the major facilitator superfamily	METABOLISM	G	Carbohydrate transport and metabolism
IFM89_036809	At3g20000	4.37e-149	KOG3296	Translocase of outer mitochondrial membrane complex, subunit TOM40	CELLULAR PROCESSES AND SIGNALING	U	Intracellular trafficking, secretion, and vesicular transport
IFM89_029613	At2g36900	3.95e-52	KOG3251	Golgi SNAP receptor complex member	CELLULAR PROCESSES AND SIGNALING	U	Intracellular trafficking, secretion, and vesicular transport
IFM89_032526	At5g47430	1.03e-158	KOG0314	Predicted E3 ubiquitin ligase	CELLULAR PROCESSES AND SIGNALING	O	Posttranslational modification, protein turnover, chaperones
IFM89_037812	At3g54630	3.77e-33	KOG0995	Centromere-associated protein HEC1	CELLULAR PROCESSES AND SIGNALING	D	Cell cycle control, cell division, chromosome partitioning
IFM89_000642	At1g80910	8.6e-234	KOG2622	Putative myrosinase precursor	CELLULAR PROCESSES AND SIGNALING	V	Defense mechanisms
IFM89_015468	At1g01620	1.21e-148	KOG0223	Aquaporin (major intrinsic protein family)	METABOLISM	G	Carbohydrate transport and metabolism
IFM89_037120	At1g62390	1.87e-297	KOG4151	Myosin assembly protein/sexual cycle protein and related proteins	CELLULAR PROCESSES AND SIGNALING	O	Posttranslational modification, protein turnover, chaperones
IFM89_038191	At1g72970	1.12e-258	KOG1238	Glucose dehydrogenase/choline dehydrogenase/mandelonitrile lyase (GMC oxidoreductase family)	POORLY CHARACTERIZED	R	General function prediction only
IFM89_025199	At4g04910	0	KOG0741	AAA+-type ATPase	CELLULAR PROCESSES AND SIGNALING	O	Posttranslational modification, protein turnover, chaperones
IFM89_016303	At1g09450	4.24e-197	KOG2464	Serine/threonine kinase (haspin family)	CELLULAR PROCESSES AND SIGNALING	D	Cell cycle control, cell division, chromosome partitioning
novel.4809	At3g25270	1.31e-11	KOG1075	FOG: Reverse transcriptase	POORLY CHARACTERIZED	R	General function prediction only
IFM89_032257	At2g44120	1.39e-77	KOG3184	60S ribosomal protein L7	INFORMATION STORAGE AND PROCESSING	J	Translation, ribosomal structure and biogenesis
IFM89_029245	At5g14530	2.39e-194	KOG1446	Histone H3 (Lys4) methyltransferase complex and RNA cleavage factor II complex, subunit SWD2	INFORMATION STORAGE AND PROCESSING	A	RNA processing and modification
IFM89_015472	At4g11410	4.56e-149	KOG1208	Dehydrogenases with different specificities (related to short-chain alcohol dehydrogenases)	METABOLISM	Q	Secondary metabolites biosynthesis, transport and catabolism
IFM89_020228	At1g09840	5.36e-258	KOG0658	Glycogen synthase kinase-3	METABOLISM	G	Carbohydrate transport and metabolism
IFM89_020064	At1g64710	1.41e-188	KOG0022	Alcohol dehydrogenase, class III	METABOLISM	Q	Secondary metabolites biosynthesis, transport and catabolism
IFM89_018614	At5g35200	1.97e-38	KOG0251	Clathrin assembly protein AP180 and related proteins, contain ENTH domain	CELLULAR PROCESSES AND SIGNALING	T	Signal transduction mechanisms
IFM89_021974	At5g64090	9.81e-122	KOG4688	Putative beta-catenin-Tcf/Lef signaling pathway component DRCTNNB1A	CELLULAR PROCESSES AND SIGNALING	T	Signal transduction mechanisms
IFM89_035429	At3g08980	6.52e-49	KOG1568	Mitochondrial inner membrane protease, subunit IMP2	CELLULAR PROCESSES AND SIGNALING	O	Posttranslational modification, protein turnover, chaperones
IFM89_032413	At2g40370	3.85e-218	KOG1263	Multicopper oxidases	METABOLISM	Q	Secondary metabolites biosynthesis, transport and catabolism
IFM89_003272	At4g15850	5.65e-113	KOG0350	DEAD-box ATP-dependent RNA helicase	INFORMATION STORAGE AND PROCESSING	A	RNA processing and modification
IFM89_022086	At3g44830	6.96e-26	KOG2369	Lecithin:cholesterol acyltransferase (LCAT)/Acyl-ceramide synthase	METABOLISM	I	Lipid transport and metabolism
IFM89_024643	At5g12200	2.05e-105	KOG2584	Dihydroorotase and related enzymes	METABOLISM	F	Nucleotide transport and metabolism
IFM89_021325	At3g49100	1.85e-24	KOG3465	Signal recognition particle, subunit Srp9	CELLULAR PROCESSES AND SIGNALING	U	Intracellular trafficking, secretion, and vesicular transport
IFM89_015579	At5g54380	0	KOG1187	Serine/threonine protein kinase	CELLULAR PROCESSES AND SIGNALING	T	Signal transduction mechanisms
IFM89_019822	At1g78210	1.57e-40	KOG1454	Predicted hydrolase/acyltransferase (alpha/beta hydrolase superfamily)	POORLY CHARACTERIZED	R	General function prediction only
novel.65	At1g14790	1.77e-50	KOG0988	RNA-directed RNA polymerase QDE-1 required for posttranscriptional gene silencing and RNA interference	INFORMATION STORAGE AND PROCESSING	A	RNA processing and modification
IFM89_032604	At4g37050	4.78e-72	KOG0513	Ca2+-independent phospholipase A2	METABOLISM	I	Lipid transport and metabolism
IFM89_027025	At1g15130	0	KOG2220	Predicted signal transduction protein	POORLY CHARACTERIZED	R	General function prediction only
IFM89_027580	At4g35830	0	KOG0452	RNA-binding translational regulator IRP (aconitase superfamily)	INFORMATION STORAGE AND PROCESSING	A	RNA processing and modification
IFM89_015682	At3g13870	2.05e-97	KOG2203	GTP-binding protein	POORLY CHARACTERIZED	R	General function prediction only
IFM89_013907	At2g41250	9.96e-132	KOG3085	Predicted hydrolase (HAD superfamily)	POORLY CHARACTERIZED	R	General function prediction only
IFM89_011570	At4g14210	0	KOG0029	Amine oxidase	METABOLISM	Q	Secondary metabolites biosynthesis, transport and catabolism
IFM89_035087	At2g42350	1.09e-22	KOG0800	FOG: Predicted E3 ubiquitin ligase	CELLULAR PROCESSES AND SIGNALING	O	Posttranslational modification, protein turnover, chaperones
IFM89_026319	At4g05530	9.55e-134	KOG0725	Reductases with broad range of substrate specificities	POORLY CHARACTERIZED	R	General function prediction only
IFM89_009787	At1g77600	3.16e-172	KOG1525	Sister chromatid cohesion complex Cohesin, subunit PDS5	CELLULAR PROCESSES AND SIGNALING	D	Cell cycle control, cell division, chromosome partitioning
novel.5868	At5g23540	2.44e-16	KOG1555	26S proteasome regulatory complex, subunit RPN11	CELLULAR PROCESSES AND SIGNALING	O	Posttranslational modification, protein turnover, chaperones
IFM89_016994	At3g58580	1.66e-41	KOG0620	Glucose-repressible alcohol dehydrogenase transcriptional effector CCR4 and related proteins	INFORMATION STORAGE AND PROCESSING	K	Transcription
IFM89_010390	At5g46630	9.84e-267	KOG0938	Adaptor complexes medium subunit family	CELLULAR PROCESSES AND SIGNALING	U	Intracellular trafficking, secretion, and vesicular transport
IFM89_037703	At3g04710_2	3.41e-08	KOG0548	Molecular co-chaperone STI1	CELLULAR PROCESSES AND SIGNALING	O	Posttranslational modification, protein turnover, chaperones
novel.5550	At4g30870	2.97e-15	KOG2379	Endonuclease MUS81	INFORMATION STORAGE AND PROCESSING	L	Replication, recombination and repair
novel.3696	At1g04200	2.25e-09	KOG2225	Proteins containing regions of low-complexity	POORLY CHARACTERIZED	R	General function prediction only
novel.8575	At3g13250	5.9e-261	KOG0987	DNA helicase PIF1/RRM3	CELLULAR PROCESSES AND SIGNALING	D	Cell cycle control, cell division, chromosome partitioning
IFM89_021773	At1g76130	2.77e-204	KOG0471	Alpha-amylase	METABOLISM	G	Carbohydrate transport and metabolism
IFM89_032570	At3g19130	1.15e-84	KOG0118	FOG: RRM domain	POORLY CHARACTERIZED	R	General function prediction only
IFM89_033957	At4g30810	1.2e-166	KOG1282	Serine carboxypeptidases (lysosomal cathepsin A)	CELLULAR PROCESSES AND SIGNALING	O	Posttranslational modification, protein turnover, chaperones
[truncated: 12,795 more rows]
