# Supplementary material for: Transcriptome and Metabolome Analysis of Isoquinoline Alkaloid Biosynthesis of Coptis chinensis in Different Years
Source: Genes (Basel). 2023 Dec 18;14(12):2232. doi: 10.3390/genes14122232 (PMC10742649; doi:10.3390/genes14122232)
Supplement: Supplementary file 1 [file genes-14-02232-s001.zip › Supplementary Table S5 Genes annotation in GO.xlsx]

## Sheet: Sheet1
ID	Annotation
IFM89_033633	GO:0016746,acyltransferase activity; GO:0003674,molecular_function; GO:0003824,catalytic activity; GO:0016740,transferase activity
IFM89_016960	GO:0005634,nucleus; GO:0019005,SCF ubiquitin ligase complex; GO:0010011,auxin binding; GO:0038198,auxin receptor activity; GO:0000822,inositol hexakisphosphate binding; GO:0004842,ubiquitin-protein transferase activity; GO:0009734,auxin-activated signaling pathway; GO:0007049,cell cycle; GO:0016036,cellular response to phosphate starvation; GO:0006952,defense response; GO:0009873,ethylene-activat…
novel.7566	GO:0004252,serine-type endopeptidase activity; GO:0006508,proteolysis; GO:0003674,molecular_function; GO:0003824,catalytic activity; GO:0004175,endopeptidase activity; GO:0008233,peptidase activity; GO:0008236,serine-type peptidase activity; GO:0016787,hydrolase activity; GO:0017171,serine hydrolase activity; GO:0140096,catalytic activity, acting on a protein; GO:0006807,nitrogen compound metabol…
IFM89_011601	GO:0005783,endoplasmic reticulum; GO:0004190,aspartic-type endopeptidase activity; GO:0070001,aspartic-type peptidase activity; GO:0003677,DNA binding; GO:0006508,proteolysis; GO:0009737,response to abscisic acid; GO:0009414,response to water deprivation; GO:0009627,systemic acquired resistance; GO:0003674,molecular_function; GO:0003824,catalytic activity; GO:0004175,endopeptidase activity; GO:00…
IFM89_016693	GO:0016788,hydrolase activity, acting on ester bonds; GO:0010223,secondary shoot formation; GO:1901601,strigolactone biosynthetic process; GO:0003674,molecular_function; GO:0003824,catalytic activity; GO:0016787,hydrolase activity; GO:0001763,morphogenesis of a branching structure; GO:0007275,multicellular organism development; GO:0008150,biological_process; GO:0009653,anatomical structure morpho…
IFM89_029507	GO:0016021,integral component of membrane; GO:0005575,cellular_component; GO:0016020,membrane; GO:0031224,intrinsic component of membrane; GO:0110165,cellular anatomical entity
IFM89_028660	GO:0005737,cytoplasm; GO:0003868,4-hydroxyphenylpyruvate dioxygenase activity; GO:0042802,identical protein binding; GO:0005506,iron ion binding; GO:0006559,L-phenylalanine catabolic process; GO:0006572,tyrosine catabolic process; GO:0003674,molecular_function; GO:0003824,catalytic activity; GO:0016491,oxidoreductase activity; GO:0016701,oxidoreductase activity, acting on single donors with incor…
IFM89_004116	GO:0031969,chloroplast membrane; GO:0016021,integral component of membrane; GO:0005886,plasma membrane; GO:0015171,amino acid transmembrane transporter activity; GO:0006865,amino acid transport; GO:0003674,molecular_function; GO:0005215,transporter activity; GO:0005342,organic acid transmembrane transporter activity; GO:0022857,transmembrane transporter activity; GO:0046943,carboxylic acid transm…
IFM89_016791	GO:0019900,kinase binding; GO:0046872,metal ion binding; GO:0009749,response to glucose; GO:1905582,response to mannose; GO:0042594,response to starvation; GO:0009744,response to sucrose; GO:0003674,molecular_function; GO:0005488,binding; GO:0005515,protein binding; GO:0019899,enzyme binding; GO:0043167,ion binding; GO:0043169,cation binding; GO:0008150,biological_process; GO:0009743,response to …
IFM89_018130	GO:0046872,metal ion binding; GO:0003674,molecular_function; GO:0005488,binding; GO:0043167,ion binding; GO:0043169,cation binding
IFM89_034725	GO:0016021,integral component of membrane; GO:0016020,membrane; GO:0000325,plant-type vacuole; GO:0015171,amino acid transmembrane transporter activity; GO:0003333,amino acid transmembrane transport; GO:0003674,molecular_function; GO:0005215,transporter activity; GO:0005342,organic acid transmembrane transporter activity; GO:0022857,transmembrane transporter activity; GO:0046943,carboxylic acid t…
IFM89_016713	GO:0010468,regulation of gene expression; GO:0008150,biological_process; GO:0008152,metabolic process; GO:0010467,gene expression; GO:0019222,regulation of metabolic process; GO:0043170,macromolecule metabolic process; GO:0050789,regulation of biological process; GO:0060255,regulation of macromolecule metabolic process; GO:0065007,biological regulation; GO:0071704,organic substance metabolic proc…
IFM89_021695	GO:0005634,nucleus; GO:0046872,metal ion binding; GO:0001708,cell fate specification; GO:0090421,embryonic meristem initiation; GO:0009880,embryonic pattern specification; GO:0055065,metal ion homeostasis; GO:0003674,molecular_function; GO:0005488,binding; GO:0043167,ion binding; GO:0043169,cation binding; GO:0008150,biological_process; GO:0009987,cellular process; GO:0030154,cell differentiation…
IFM89_025626	GO:0005634,nucleus; GO:0003700,DNA-binding transcription factor activity; GO:0043565,sequence-specific DNA binding; GO:0016036,cellular response to phosphate starvation; GO:0009740,gibberellic acid mediated signaling pathway; GO:0009686,gibberellin biosynthetic process; GO:0010373,negative regulation of gibberellin biosynthetic process; GO:0045892,negative regulation of DNA-templated transcriptio…
IFM89_038438	GO:0005634,nucleus; GO:0019005,SCF ubiquitin ligase complex; GO:0004842,ubiquitin-protein transferase activity; GO:0009734,auxin-activated signaling pathway; GO:0071365,cellular response to auxin stimulus; GO:0010311,lateral root formation; GO:0051781,positive regulation of cell division; GO:0016567,protein ubiquitination; GO:0031146,SCF-dependent proteasomal ubiquitin-dependent protein catabolic…
IFM89_014288	GO:0016021,integral component of membrane; GO:0005811,lipid droplet; GO:0070524,11-beta-hydroxysteroid dehydrogenase (NADP+) activity; GO:0102196,cortisol dehydrogenase activity; GO:0003674,molecular_function; GO:0003824,catalytic activity; GO:0003845,11-beta-hydroxysteroid dehydrogenase [NAD(P)] activity; GO:0016229,steroid dehydrogenase activity; GO:0016491,oxidoreductase activity; GO:0016614,o…
novel.3090	GO:0009941,chloroplast envelope; GO:0016021,integral component of membrane; GO:0005575,cellular_component; GO:0005622,intracellular anatomical structure; GO:0005737,cytoplasm; GO:0009507,chloroplast; GO:0009526,plastid envelope; GO:0009536,plastid; GO:0031967,organelle envelope; GO:0031975,envelope; GO:0043226,organelle; GO:0043227,membrane-bounded organelle; GO:0043229,intracellular organelle; G…
IFM89_013433	GO:0009507,chloroplast; GO:0009853,photorespiration; GO:0019253,reductive pentose-phosphate cycle; GO:0008150,biological_process; GO:0008152,metabolic process; GO:0009987,cellular process; GO:0043094,cellular metabolic compound salvage; GO:0044237,cellular metabolic process; GO:0005975,carbohydrate metabolic process; GO:0009058,biosynthetic process; GO:0015977,carbon fixation; GO:0015979,photosyn…
IFM89_014928	GO:0005737,cytoplasm; GO:0003729,mRNA binding; GO:0000234,phosphoethanolamine N-methyltransferase activity; GO:0052667,phosphomethylethanolamine N-methyltransferase activity; GO:0032259,methylation; GO:0006656,phosphatidylcholine biosynthetic process; GO:0003674,molecular_function; GO:0003676,nucleic acid binding; GO:0003723,RNA binding; GO:0005488,binding; GO:0097159,organic cyclic compound bind…
IFM89_037381	GO:0005789,endoplasmic reticulum membrane; GO:0016021,integral component of membrane; GO:0102963,(S)-corytuberine synthase activity; GO:0020037,heme binding; GO:0005506,iron ion binding; GO:0004497,monooxygenase activity; GO:0009820,alkaloid metabolic process; GO:0019438,aromatic compound biosynthetic process; GO:1901362,organic cyclic compound biosynthetic process; GO:0003674,molecular_function;…
IFM89_002418	GO:0016021,integral component of membrane; GO:0005886,plasma membrane; GO:0046872,metal ion binding; GO:0061630,ubiquitin protein ligase activity; GO:0070417,cellular response to cold; GO:0006952,defense response; GO:0009909,regulation of flower development; GO:0010966,regulation of phosphate transport; GO:0003674,molecular_function; GO:0005488,binding; GO:0043167,ion binding; GO:0043169,cation b…
IFM89_001988	GO:0016021,integral component of membrane; GO:0010295,(+)-abscisic acid 8'-hydroxylase activity; GO:0020037,heme binding; GO:0005506,iron ion binding; GO:0004497,monooxygenase activity; GO:0016491,oxidoreductase activity; GO:0046345,abscisic acid catabolic process; GO:0009856,pollination; GO:0009737,response to abscisic acid; GO:0009733,response to auxin; GO:0009414,response to water deprivation;…
IFM89_009523	GO:0005829,cytosol; GO:0005524,ATP binding; GO:0004694,eukaryotic translation initiation factor 2alpha kinase activity; GO:0004672,protein kinase activity; GO:0106310,protein serine kinase activity; GO:0000049,tRNA binding; GO:0034198,cellular response to amino acid starvation; GO:0072755,cellular response to benomyl; GO:0070301,cellular response to hydrogen peroxide; GO:1990451,cellular stress r…
IFM89_016965	GO:0005737,cytoplasm; GO:0016161,beta-amylase activity; GO:0000272,polysaccharide catabolic process; GO:0003674,molecular_function; GO:0003824,catalytic activity; GO:0004553,hydrolase activity, hydrolyzing O-glycosyl compounds; GO:0016160,amylase activity; GO:0016787,hydrolase activity; GO:0016798,hydrolase activity, acting on glycosyl bonds; GO:0005975,carbohydrate metabolic process; GO:0005976,…
IFM89_029031	GO:0000325,plant-type vacuole; GO:0005886,plasma membrane; GO:0005524,ATP binding; GO:0005315,inorganic phosphate transmembrane transporter activity; GO:0035435,phosphate ion transmembrane transport; GO:0000166,nucleotide binding; GO:0003674,molecular_function; GO:0005488,binding; GO:0017076,purine nucleotide binding; GO:0030554,adenyl nucleotide binding; GO:0032553,ribonucleotide binding; GO:003…
IFM89_010499	GO:0031225,anchored component of membrane; GO:0046658,anchored component of plasma membrane; GO:0005576,extracellular region; GO:0042973,glucan endo-1,3-beta-D-glucosidase activity; GO:0005975,carbohydrate metabolic process; GO:0071555,cell wall organization; GO:0006952,defense response; GO:0003674,molecular_function; GO:0003824,catalytic activity; GO:0004553,hydrolase activity, hydrolyzing O-gly…
IFM89_005779	GO:0005789,endoplasmic reticulum membrane; GO:0016021,integral component of membrane; GO:0102097,(22S)-22-hydroxy-5alpha-campestan-3-one C-23 hydroxylase activity; GO:0102136,3-epi-6-deoxocathasterone C-23 hydroxylase activity; GO:0020037,heme binding; GO:0005506,iron ion binding; GO:0004497,monooxygenase activity; GO:0016491,oxidoreductase activity; GO:0016709,oxidoreductase activity, acting on …
IFM89_030295	GO:0009507,chloroplast; GO:0009941,chloroplast envelope; GO:0009534,chloroplast thylakoid; GO:0009535,chloroplast thylakoid membrane; GO:0016021,integral component of membrane; GO:0009536,plastid; GO:0009579,thylakoid; GO:0005524,ATP binding; GO:0016887,ATP hydrolysis activity; GO:0004176,ATP-dependent peptidase activity; GO:0046872,metal ion binding; GO:0004222,metalloendopeptidase activity; GO:…
novel.6557	GO:0031901,early endosome membrane; GO:0005789,endoplasmic reticulum membrane; GO:0010008,endosome membrane; GO:0012507,ER to Golgi transport vesicle membrane; GO:0005794,Golgi apparatus; GO:0016021,integral component of membrane; GO:0031902,late endosome membrane; GO:0009705,plant-type vacuole membrane; GO:0031201,SNARE complex; GO:0005484,SNAP receptor activity; GO:0000149,SNARE binding; GO:000…
IFM89_019818	GO:0005634,nucleus; GO:0000325,plant-type vacuole; GO:0005575,cellular_component; GO:0005622,intracellular anatomical structure; GO:0043226,organelle; GO:0043227,membrane-bounded organelle; GO:0043229,intracellular organelle; GO:0043231,intracellular membrane-bounded organelle; GO:0110165,cellular anatomical entity; GO:0005737,cytoplasm; GO:0005773,vacuole
IFM89_033856	GO:0005524,ATP binding; GO:0016887,ATP hydrolysis activity; GO:0003723,RNA binding; GO:0003724,RNA helicase activity; GO:0000166,nucleotide binding; GO:0003674,molecular_function; GO:0005488,binding; GO:0017076,purine nucleotide binding; GO:0030554,adenyl nucleotide binding; GO:0032553,ribonucleotide binding; GO:0032555,purine ribonucleotide binding; GO:0032559,adenyl ribonucleotide binding; GO:0…
IFM89_003733	GO:0009507,chloroplast; GO:0003849,3-deoxy-7-phosphoheptulonate synthase activity; GO:0046872,metal ion binding; GO:0009073,aromatic amino acid family biosynthetic process; GO:0008652,cellular amino acid biosynthetic process; GO:0009423,chorismate biosynthetic process; GO:0010597,green leaf volatile biosynthetic process; GO:0003674,molecular_function; GO:0003824,catalytic activity; GO:0016740,tra…
IFM89_038178	GO:0005666,RNA polymerase III complex; GO:0000166,nucleotide binding; GO:0006384,transcription initiation at RNA polymerase III promoter; GO:0003674,molecular_function; GO:0005488,binding; GO:0036094,small molecule binding; GO:0097159,organic cyclic compound binding; GO:1901265,nucleoside phosphate binding; GO:1901363,heterocyclic compound binding; GO:0006139,nucleobase-containing compound metabo…
IFM89_033983	GO:0009507,chloroplast; GO:0009570,chloroplast stroma; GO:0005634,nucleus; GO:0009536,plastid; GO:0005575,cellular_component; GO:0005622,intracellular anatomical structure; GO:0005737,cytoplasm; GO:0043226,organelle; GO:0043227,membrane-bounded organelle; GO:0043229,intracellular organelle; GO:0043231,intracellular membrane-bounded organelle; GO:0110165,cellular anatomical entity; GO:0009532,plas…
IFM89_015272	GO:0016607,nuclear speck; GO:0005634,nucleus; GO:0005681,spliceosomal complex; GO:0089701,U2AF complex; GO:0003677,DNA binding; GO:0046872,metal ion binding; GO:0030628,pre-mRNA 3'-splice site binding; GO:0000398,mRNA splicing, via spliceosome; GO:0048573,photoperiodism, flowering; GO:0003674,molecular_function; GO:0003676,nucleic acid binding; GO:0005488,binding; GO:0097159,organic cyclic compou…
IFM89_023516	GO:0009507,chloroplast; GO:0009941,chloroplast envelope; GO:0009534,chloroplast thylakoid; GO:0009535,chloroplast thylakoid membrane; GO:0016021,integral component of membrane; GO:0005739,mitochondrion; GO:0003729,mRNA binding; GO:0003674,molecular_function; GO:0003676,nucleic acid binding; GO:0003723,RNA binding; GO:0005488,binding; GO:0097159,organic cyclic compound binding; GO:1901363,heterocy…
novel.6789	GO:0005737,cytoplasm; GO:0005739,mitochondrion; GO:0005634,nucleus; GO:0000175,3'-5'-exoribonuclease activity; GO:0043169,cation binding; GO:0046872,metal ion binding; GO:0004535,poly(A)-specific ribonuclease activity; GO:0003723,RNA binding; GO:0006952,defense response; GO:0006397,mRNA processing; GO:0009737,response to abscisic acid; GO:0006970,response to osmotic stress; GO:0009751,response to…
novel.6353	GO:0005737,cytoplasm; GO:0005575,cellular_component; GO:0005622,intracellular anatomical structure; GO:0110165,cellular anatomical entity
IFM89_034846	GO:0005739,mitochondrion; GO:0005524,ATP binding; GO:0140662,ATP-dependent protein folding chaperone; GO:0042026,protein refolding; GO:0000166,nucleotide binding; GO:0003674,molecular_function; GO:0005488,binding; GO:0017076,purine nucleotide binding; GO:0030554,adenyl nucleotide binding; GO:0032553,ribonucleotide binding; GO:0032555,purine ribonucleotide binding; GO:0032559,adenyl ribonucleotide…
IFM89_004602	GO:0016021,integral component of membrane; GO:0020037,heme binding; GO:0005506,iron ion binding; GO:0004497,monooxygenase activity; GO:0016705,oxidoreductase activity, acting on paired donors, with incorporation or reduction of molecular oxygen; GO:0003674,molecular_function; GO:0005488,binding; GO:0046906,tetrapyrrole binding; GO:0097159,organic cyclic compound binding; GO:1901363,heterocyclic c…
IFM89_027923	GO:0000439,transcription factor TFIIH core complex; GO:0005675,transcription factor TFIIH holo complex; GO:0006281,DNA repair; GO:0006289,nucleotide-excision repair; GO:0070816,phosphorylation of RNA polymerase II C-terminal domain; GO:0006360,transcription by RNA polymerase I; GO:0006366,transcription by RNA polymerase II; GO:0006139,nucleobase-containing compound metabolic process; GO:0006259,D…
IFM89_012412	GO:0005677,chromatin silencing complex; GO:0031519,PcG protein complex; GO:0009506,plasmodesma; GO:0003677,DNA binding; GO:0042802,identical protein binding; GO:0046872,metal ion binding; GO:0035064,methylated histone binding; GO:0032922,circadian regulation of gene expression; GO:0009908,flower development; GO:1900111,positive regulation of histone H3-K9 dimethylation; GO:0040029,epigenetic regu…
IFM89_016410	GO:0005576,extracellular region; GO:0020037,heme binding; GO:0046872,metal ion binding; GO:0004601,peroxidase activity; GO:0042744,hydrogen peroxide catabolic process; GO:0006979,response to oxidative stress; GO:0003674,molecular_function; GO:0005488,binding; GO:0046906,tetrapyrrole binding; GO:0097159,organic cyclic compound binding; GO:1901363,heterocyclic compound binding; GO:0043167,ion bindi…
IFM89_025458	GO:0000976,transcription cis-regulatory region binding; GO:0010199,organ boundary specification between lateral organs and the meristem; GO:0001067,transcription regulatory region nucleic acid binding; GO:0003674,molecular_function; GO:0003676,nucleic acid binding; GO:0003677,DNA binding; GO:0003690,double-stranded DNA binding; GO:0005488,binding; GO:0043565,sequence-specific DNA binding; GO:0097…
IFM89_004970	GO:0005634,nucleus; GO:0009881,photoreceptor activity; GO:0009637,response to blue light; GO:0003674,molecular_function; GO:0038023,signaling receptor activity; GO:0060089,molecular transducer activity; GO:0008150,biological_process; GO:0009314,response to radiation; GO:0009416,response to light stimulus; GO:0009628,response to abiotic stimulus; GO:0050896,response to stimulus; GO:0005575,cellula…
IFM89_007330	GO:0003743,translation initiation factor activity; GO:0003674,molecular_function; GO:0003676,nucleic acid binding; GO:0005488,binding; GO:0008135,translation factor activity, RNA binding; GO:0045182,translation regulator activity; GO:0090079,translation regulator activity, nucleic acid binding; GO:0097159,organic cyclic compound binding; GO:1901363,heterocyclic compound binding
IFM89_002224	GO:0005759,mitochondrial matrix; GO:0005739,mitochondrion; GO:0005524,ATP binding; GO:0046872,metal ion binding; GO:0004485,methylcrotonoyl-CoA carboxylase activity; GO:0006552,leucine catabolic process; GO:0000166,nucleotide binding; GO:0003674,molecular_function; GO:0005488,binding; GO:0017076,purine nucleotide binding; GO:0030554,adenyl nucleotide binding; GO:0032553,ribonucleotide binding; GO…
IFM89_030593	GO:0005615,extracellular space; GO:0052595,aliphatic amine oxidase activity; GO:0052594,aminoacetone:oxygen oxidoreductase(deaminating) activity; GO:0005507,copper ion binding; GO:0052596,phenethylamine:oxygen oxidoreductase (deaminating) activity; GO:0008131,primary amine oxidase activity; GO:0048038,quinone binding; GO:0052593,tryptamine:oxygen oxidoreductase (deaminating) activity; GO:0009738,…
IFM89_018380	GO:1990316,Atg1/ULK1 kinase complex; GO:0005776,autophagosome; GO:0031410,cytoplasmic vesicle; GO:0005829,cytosol; GO:0019898,extrinsic component of membrane; GO:0000407,phagophore assembly site; GO:0000423,mitophagy; GO:0034727,piecemeal microautophagy of the nucleus; GO:0034497,protein localization to phagophore assembly site; GO:0015031,protein transport; GO:0000422,autophagy of mitochondrion;…
IFM89_012949	GO:0016207,4-coumarate-CoA ligase activity; GO:0005524,ATP binding; GO:0016405,CoA-ligase activity; GO:0009698,phenylpropanoid metabolic process; GO:0003674,molecular_function; GO:0003824,catalytic activity; GO:0016874,ligase activity; GO:0016877,ligase activity, forming carbon-sulfur bonds; GO:0016878,acid-thiol ligase activity; GO:0000166,nucleotide binding; GO:0005488,binding; GO:0017076,purin…
IFM89_007551	GO:0009055,electron transfer activity; GO:0046872,metal ion binding; GO:0003674,molecular_function; GO:0003824,catalytic activity; GO:0016491,oxidoreductase activity; GO:0005488,binding; GO:0043167,ion binding; GO:0043169,cation binding
IFM89_012393	GO:0012505,endomembrane system; GO:0016021,integral component of membrane; GO:0005886,plasma membrane; GO:0031201,SNARE complex; GO:0005484,SNAP receptor activity; GO:0000149,SNARE binding; GO:0007049,cell cycle; GO:0051301,cell division; GO:0006887,exocytosis; GO:0006886,intracellular protein transport; GO:0040008,regulation of growth; GO:0048278,vesicle docking; GO:0006906,vesicle fusion; GO:00…
IFM89_005116	GO:0005524,ATP binding; GO:0008865,fructokinase activity; GO:0019252,starch biosynthetic process; GO:0000166,nucleotide binding; GO:0003674,molecular_function; GO:0005488,binding; GO:0017076,purine nucleotide binding; GO:0030554,adenyl nucleotide binding; GO:0032553,ribonucleotide binding; GO:0032555,purine ribonucleotide binding; GO:0032559,adenyl ribonucleotide binding; GO:0035639,purine ribonu…
IFM89_008715	GO:0009535,chloroplast thylakoid membrane; GO:0019898,extrinsic component of membrane; GO:0009654,photosystem II oxygen evolving complex; GO:0005509,calcium ion binding; GO:0015979,photosynthesis; GO:0003674,molecular_function; GO:0005488,binding; GO:0043167,ion binding; GO:0043169,cation binding; GO:0046872,metal ion binding; GO:0008150,biological_process; GO:0008152,metabolic process; GO:000998…
IFM89_004627	GO:0005634,nucleus; GO:0045892,negative regulation of DNA-templated transcription; GO:0009737,response to abscisic acid; GO:0007165,signal transduction; GO:0006139,nucleobase-containing compound metabolic process; GO:0006351,DNA-templated transcription; GO:0006355,regulation of DNA-templated transcription; GO:0006725,cellular aromatic compound metabolic process; GO:0006807,nitrogen compound metab…
novel.8106	GO:0005634,nucleus; GO:0000981,DNA-binding transcription factor activity, RNA polymerase II-specific; GO:0000978,RNA polymerase II cis-regulatory region sequence-specific DNA binding; GO:0006357,regulation of transcription by RNA polymerase II; GO:0003674,molecular_function; GO:0003700,DNA-binding transcription factor activity; GO:0140110,transcription regulator activity; GO:0000976,transcription…
IFM89_014570	GO:0005634,nucleus; GO:0003677,DNA binding; GO:0001216,DNA-binding transcription activator activity; GO:0003700,DNA-binding transcription factor activity; GO:0043565,sequence-specific DNA binding; GO:1990837,sequence-specific double-stranded DNA binding; GO:0048825,cotyledon development; GO:0048826,cotyledon morphogenesis; GO:0009793,embryo development ending in seed dormancy; GO:0048366,leaf dev…
IFM89_016433	GO:0005634,nucleus; GO:0005524,ATP binding; GO:0061631,ubiquitin conjugating enzyme activity; GO:0004842,ubiquitin-protein transferase activity; GO:0000209,protein polyubiquitination; GO:0006511,ubiquitin-dependent protein catabolic process; GO:0000166,nucleotide binding; GO:0003674,molecular_function; GO:0005488,binding; GO:0017076,purine nucleotide binding; GO:0030554,adenyl nucleotide binding;…
novel.2125	GO:0005739,mitochondrion; GO:0005575,cellular_component; GO:0005622,intracellular anatomical structure; GO:0005737,cytoplasm; GO:0043226,organelle; GO:0043227,membrane-bounded organelle; GO:0043229,intracellular organelle; GO:0043231,intracellular membrane-bounded organelle; GO:0110165,cellular anatomical entity
novel.8345	GO:0009898,cytoplasmic side of plasma membrane; GO:0005783,endoplasmic reticulum; GO:0005789,endoplasmic reticulum membrane; GO:0005524,ATP binding; GO:0004672,protein kinase activity; GO:0106310,protein serine kinase activity; GO:0004674,protein serine/threonine kinase activity; GO:0004712,protein serine/threonine/tyrosine kinase activity; GO:0045087,innate immune response; GO:0046777,protein au…
IFM89_021560	GO:0009507,chloroplast; GO:0009570,chloroplast stroma; GO:0005739,mitochondrion; GO:0005886,plasma membrane; GO:0009536,plastid; GO:0005524,ATP binding; GO:0051287,NAD binding; GO:0004617,phosphoglycerate dehydrogenase activity; GO:0009793,embryo development ending in seed dormancy; GO:0006564,L-serine biosynthetic process; GO:0009561,megagametogenesis; GO:0009555,pollen development; GO:0000096,s…
IFM89_018345	GO:0005199,structural constituent of cell wall; GO:0009664,plant-type cell wall organization; GO:0003674,molecular_function; GO:0005198,structural molecule activity; GO:0008150,biological_process; GO:0009987,cellular process; GO:0016043,cellular component organization; GO:0045229,external encapsulating structure organization; GO:0071554,cell wall organization or biogenesis; GO:0071555,cell wall o…
IFM89_002458	GO:0005789,endoplasmic reticulum membrane; GO:0016021,integral component of membrane; GO:0009734,auxin-activated signaling pathway; GO:0080162,endoplasmic reticulum to cytosol auxin transport; GO:0009733,response to auxin; GO:0007154,cell communication; GO:0007165,signal transduction; GO:0008150,biological_process; GO:0009719,response to endogenous stimulus; GO:0009725,response to hormone; GO:000…
IFM89_020691	GO:0016021,integral component of membrane; GO:0005575,cellular_component; GO:0016020,membrane; GO:0031224,intrinsic component of membrane; GO:0110165,cellular anatomical entity
IFM89_014217	GO:0009507,chloroplast; GO:0009570,chloroplast stroma; GO:0003962,cystathionine gamma-synthase activity; GO:0102028,cystathionine gamma-synthase activity (acts on O-phosphohomoserine); GO:0030170,pyridoxal phosphate binding; GO:0009086,methionine biosynthetic process; GO:0001887,selenium compound metabolic process; GO:0019346,transsulfuration; GO:0003674,molecular_function; GO:0003824,catalytic a…
novel.8113	GO:0005576,extracellular region; GO:0008239,dipeptidyl-peptidase activity; GO:0008236,serine-type peptidase activity; GO:0009561,megagametogenesis; GO:0006508,proteolysis; GO:0003674,molecular_function; GO:0003824,catalytic activity; GO:0008233,peptidase activity; GO:0008238,exopeptidase activity; GO:0016787,hydrolase activity; GO:0140096,catalytic activity, acting on a protein; GO:0017171,serine…
novel.3956	GO:0005829,cytosol; GO:0005783,endoplasmic reticulum; GO:0005794,Golgi apparatus; GO:0016021,integral component of membrane; GO:0005886,plasma membrane; GO:0019706,protein-cysteine S-palmitoyltransferase activity; GO:0018230,peptidyl-L-cysteine S-palmitoylation; GO:0006612,protein targeting to membrane; GO:0003674,molecular_function; GO:0003824,catalytic activity; GO:0016409,palmitoyltransferase …
IFM89_032854	GO:0005789,endoplasmic reticulum membrane; GO:0016021,integral component of membrane; GO:0020037,heme binding; GO:0005506,iron ion binding; GO:0050593,N-methylcoclaurine 3'-monooxygenase activity; GO:0019438,aromatic compound biosynthetic process; GO:1901362,organic cyclic compound biosynthetic process; GO:0003674,molecular_function; GO:0005488,binding; GO:0046906,tetrapyrrole binding; GO:0097159…
IFM89_034180	GO:0009507,chloroplast; GO:0009570,chloroplast stroma; GO:0005634,nucleus; GO:0009416,response to light stimulus; GO:0008150,biological_process; GO:0009314,response to radiation; GO:0009628,response to abiotic stimulus; GO:0050896,response to stimulus; GO:0005575,cellular_component; GO:0005622,intracellular anatomical structure; GO:0005737,cytoplasm; GO:0009536,plastid; GO:0043226,organelle; GO:0…
IFM89_009525	GO:0005576,extracellular region; GO:0004650,polygalacturonase activity; GO:0005975,carbohydrate metabolic process; GO:0009831,plant-type cell wall modification involved in multidimensional cell growth; GO:0003674,molecular_function; GO:0003824,catalytic activity; GO:0004553,hydrolase activity, hydrolyzing O-glycosyl compounds; GO:0016787,hydrolase activity; GO:0016798,hydrolase activity, acting o…
IFM89_009131	GO:0005829,cytosol; GO:0012505,endomembrane system; GO:0005783,endoplasmic reticulum; GO:0005886,plasma membrane; GO:0004602,glutathione peroxidase activity; GO:0004601,peroxidase activity; GO:0009793,embryo development ending in seed dormancy; GO:0006979,response to oxidative stress; GO:0003674,molecular_function; GO:0003824,catalytic activity; GO:0016209,antioxidant activity; GO:0016491,oxidore…
IFM89_022620	GO:0033907,beta-D-fucosidase activity; GO:0004565,beta-galactosidase activity; GO:0008422,beta-glucosidase activity; GO:0102483,scopolin beta-glucosidase activity; GO:0005975,carbohydrate metabolic process; GO:0003674,molecular_function; GO:0003824,catalytic activity; GO:0004553,hydrolase activity, hydrolyzing O-glycosyl compounds; GO:0016787,hydrolase activity; GO:0016798,hydrolase activity, act…
IFM89_012137	GO:0005829,cytosol; GO:0009536,plastid; GO:0071260,cellular response to mechanical stimulus; GO:0009904,chloroplast accumulation movement; GO:0009903,chloroplast avoidance movement; GO:0008150,biological_process; GO:0009605,response to external stimulus; GO:0009612,response to mechanical stimulus; GO:0009628,response to abiotic stimulus; GO:0009987,cellular process; GO:0050896,response to stimulu…
IFM89_022021	GO:0005634,nucleus; GO:0010541,acropetal auxin transport; GO:0010540,basipetal auxin transport; GO:0009736,cytokinin-activated signaling pathway; GO:0016567,protein ubiquitination; GO:0006810,transport; GO:0008150,biological_process; GO:0009914,hormone transport; GO:0009926,auxin polar transport; GO:0010817,regulation of hormone levels; GO:0051179,localization; GO:0051234,establishment of localiz…
IFM89_020308	GO:0016021,integral component of membrane; GO:0004650,polygalacturonase activity; GO:0005975,carbohydrate metabolic process; GO:0003674,molecular_function; GO:0003824,catalytic activity; GO:0004553,hydrolase activity, hydrolyzing O-glycosyl compounds; GO:0016787,hydrolase activity; GO:0016798,hydrolase activity, acting on glycosyl bonds; GO:0008150,biological_process; GO:0008152,metabolic process…
IFM89_021954	GO:0009570,chloroplast stroma; GO:0009534,chloroplast thylakoid; GO:0016165,linoleate 13S-lipoxygenase activity; GO:0046872,metal ion binding; GO:0016702,oxidoreductase activity, acting on single donors with incorporation of molecular oxygen, incorporation of two atoms of oxygen; GO:0006633,fatty acid biosynthetic process; GO:0010597,green leaf volatile biosynthetic process; GO:0034440,lipid oxid…
IFM89_011008	GO:0005737,cytoplasm; GO:0005634,nucleus; GO:0003700,DNA-binding transcription factor activity; GO:0043565,sequence-specific DNA binding; GO:0000976,transcription cis-regulatory region binding; GO:0006355,regulation of DNA-templated transcription; GO:0003674,molecular_function; GO:0140110,transcription regulator activity; GO:0003676,nucleic acid binding; GO:0003677,DNA binding; GO:0005488,binding…
IFM89_036526	GO:0005576,extracellular region; GO:0003993,acid phosphatase activity; GO:0046872,metal ion binding; GO:0003674,molecular_function; GO:0003824,catalytic activity; GO:0016787,hydrolase activity; GO:0016788,hydrolase activity, acting on ester bonds; GO:0016791,phosphatase activity; GO:0042578,phosphoric ester hydrolase activity; GO:0005488,binding; GO:0043167,ion binding; GO:0043169,cation binding;…
IFM89_010682	GO:0005829,cytosol; GO:0005524,ATP binding; GO:0046872,metal ion binding; GO:0004478,methionine adenosyltransferase activity; GO:0006730,one-carbon metabolic process; GO:0006556,S-adenosylmethionine biosynthetic process; GO:0000166,nucleotide binding; GO:0003674,molecular_function; GO:0005488,binding; GO:0017076,purine nucleotide binding; GO:0030554,adenyl nucleotide binding; GO:0032553,ribonucle…
IFM89_000111	GO:0005634,nucleus; GO:0005516,calmodulin binding; GO:0003674,molecular_function; GO:0005488,binding; GO:0005515,protein binding; GO:0005575,cellular_component; GO:0005622,intracellular anatomical structure; GO:0043226,organelle; GO:0043227,membrane-bounded organelle; GO:0043229,intracellular organelle; GO:0043231,intracellular membrane-bounded organelle; GO:0110165,cellular anatomical entity
IFM89_012538	GO:0005737,cytoplasm; GO:0016279,protein-lysine N-methyltransferase activity; GO:0018022,peptidyl-lysine methylation; GO:0003674,molecular_function; GO:0003824,catalytic activity; GO:0008168,methyltransferase activity; GO:0008170,N-methyltransferase activity; GO:0008276,protein methyltransferase activity; GO:0008757,S-adenosylmethionine-dependent methyltransferase activity; GO:0016278,lysine N-me…
novel.8045	GO:0000139,Golgi membrane; GO:0016021,integral component of membrane; GO:0005886,plasma membrane; GO:0016760,cellulose synthase (UDP-forming) activity; GO:0051753,mannan synthase activity; GO:0071555,cell wall organization; GO:0030244,cellulose biosynthetic process; GO:0009833,plant-type primary cell wall biogenesis; GO:0003674,molecular_function; GO:0003824,catalytic activity; GO:0008194,UDP-gly…
IFM89_003004	GO:0005654,nucleoplasm; GO:0003723,RNA binding; GO:0006397,mRNA processing; GO:0008380,RNA splicing; GO:0003674,molecular_function; GO:0003676,nucleic acid binding; GO:0005488,binding; GO:0097159,organic cyclic compound binding; GO:1901363,heterocyclic compound binding; GO:0006139,nucleobase-containing compound metabolic process; GO:0006396,RNA processing; GO:0006725,cellular aromatic compound me…
IFM89_011005	GO:0005737,cytoplasm; GO:0043231,intracellular membrane-bounded organelle; GO:0005739,mitochondrion; GO:0031982,vesicle; GO:0030276,clathrin binding; GO:0007015,actin filament organization; GO:0071483,cellular response to blue light; GO:0009904,chloroplast accumulation movement; GO:0009903,chloroplast avoidance movement; GO:0072318,clathrin coat disassembly; GO:0072583,clathrin-dependent endocyto…
IFM89_025610	GO:0005737,cytoplasm; GO:0016757,glycosyltransferase activity; GO:0047216,inositol 3-alpha-galactosyltransferase activity; GO:0046872,metal ion binding; GO:0006012,galactose metabolic process; GO:0003674,molecular_function; GO:0003824,catalytic activity; GO:0016740,transferase activity; GO:0008194,UDP-glycosyltransferase activity; GO:0008378,galactosyltransferase activity; GO:0016758,hexosyltrans…
IFM89_015797	GO:0046872,metal ion binding; GO:0003674,molecular_function; GO:0005488,binding; GO:0043167,ion binding; GO:0043169,cation binding
IFM89_019951	GO:0005730,nucleolus; GO:0005634,nucleus; GO:0000976,transcription cis-regulatory region binding; GO:0019760,glucosinolate metabolic process; GO:0006355,regulation of DNA-templated transcription; GO:0001067,transcription regulatory region nucleic acid binding; GO:0003674,molecular_function; GO:0003676,nucleic acid binding; GO:0003677,DNA binding; GO:0003690,double-stranded DNA binding; GO:0005488…
IFM89_001641	GO:0016021,integral component of membrane; GO:0005575,cellular_component; GO:0016020,membrane; GO:0031224,intrinsic component of membrane; GO:0110165,cellular anatomical entity
IFM89_009002	GO:0005737,cytoplasm; GO:0004067,asparaginase activity; GO:0008798,beta-aspartyl-peptidase activity; GO:0016540,protein autoprocessing; GO:0003674,molecular_function; GO:0003824,catalytic activity; GO:0016787,hydrolase activity; GO:0016810,hydrolase activity, acting on carbon-nitrogen (but not peptide) bonds; GO:0016811,hydrolase activity, acting on carbon-nitrogen (but not peptide) bonds, in lin…
IFM89_038392	GO:0008936,nicotinamidase activity; GO:0019674,NAD metabolic process; GO:0019363,pyridine nucleotide biosynthetic process; GO:0003674,molecular_function; GO:0003824,catalytic activity; GO:0016787,hydrolase activity; GO:0016810,hydrolase activity, acting on carbon-nitrogen (but not peptide) bonds; GO:0016811,hydrolase activity, acting on carbon-nitrogen (but not peptide) bonds, in linear amides; G…
IFM89_031645	GO:0016021,integral component of membrane; GO:0016020,membrane; GO:0000325,plant-type vacuole; GO:0005774,vacuolar membrane; GO:0005773,vacuole; GO:0015297,antiporter activity; GO:0022857,transmembrane transporter activity; GO:0042910,xenobiotic transmembrane transporter activity; GO:1990961,xenobiotic detoxification by transmembrane export across the plasma membrane; GO:0003674,molecular_functio…
IFM89_036586	GO:0000793,condensed chromosome; GO:0005730,nucleolus; GO:0005634,nucleus; GO:0003677,DNA binding; GO:0003700,DNA-binding transcription factor activity; GO:0042802,identical protein binding; GO:0042803,protein homodimerization activity; GO:0000976,transcription cis-regulatory region binding; GO:0008356,asymmetric cell division; GO:0042742,defense response to bacterium; GO:0050832,defense response…
IFM89_011528	GO:0016021,integral component of membrane; GO:0016020,membrane; GO:0005739,mitochondrion; GO:0000741,karyogamy; GO:0010197,polar nucleus fusion; GO:0009651,response to salt stress; GO:0006996,organelle organization; GO:0006997,nucleus organization; GO:0008150,biological_process; GO:0009987,cellular process; GO:0016043,cellular component organization; GO:0048284,organelle fusion; GO:0071840,cellul…
IFM89_035040	GO:0045430,chalcone isomerase activity; GO:0009813,flavonoid biosynthetic process; GO:0003674,molecular_function; GO:0003824,catalytic activity; GO:0016853,isomerase activity; GO:0016872,intramolecular lyase activity; GO:0008150,biological_process; GO:0008152,metabolic process; GO:0009058,biosynthetic process; GO:0009812,flavonoid metabolic process; GO:0071704,organic substance metabolic process;…
IFM89_003647	GO:0009416,response to light stimulus; GO:0008150,biological_process; GO:0009314,response to radiation; GO:0009628,response to abiotic stimulus; GO:0050896,response to stimulus
IFM89_020846	GO:0009626,plant-type hypersensitive response; GO:2000031,regulation of salicylic acid mediated signaling pathway; GO:0002376,immune system process; GO:0006950,response to stress; GO:0006952,defense response; GO:0006955,immune response; GO:0008150,biological_process; GO:0008219,cell death; GO:0009605,response to external stimulus; GO:0009607,response to biotic stimulus; GO:0009987,cellular proces…
IFM89_018830	GO:0071944,cell periphery; GO:0016021,integral component of membrane; GO:0005886,plasma membrane; GO:0035618,root hair; GO:0005262,calcium channel activity; GO:0005516,calmodulin binding; GO:0030552,cAMP binding; GO:0030553,cGMP binding; GO:0005223,intracellular cGMP-activated cation channel activity; GO:0005249,voltage-gated potassium channel activity; GO:0009408,response to heat; GO:0003674,mol…
IFM89_030396	GO:0102128,chalcone synthase activity; GO:0016210,naringenin-chalcone synthase activity; GO:0009813,flavonoid biosynthetic process; GO:0003674,molecular_function; GO:0003824,catalytic activity; GO:0016740,transferase activity; GO:0016746,acyltransferase activity; GO:0016747,acyltransferase activity, transferring groups other than amino-acyl groups; GO:0008150,biological_process; GO:0008152,metabo…
IFM89_026391	GO:0005789,endoplasmic reticulum membrane; GO:0016021,integral component of membrane; GO:0046872,metal ion binding; GO:0061630,ubiquitin protein ligase activity; GO:0004842,ubiquitin-protein transferase activity; GO:0043161,proteasome-mediated ubiquitin-dependent protein catabolic process; GO:0016567,protein ubiquitination; GO:0009409,response to cold; GO:0009723,response to ethylene; GO:0006970,…
IFM89_024738	GO:0009507,chloroplast; GO:0009570,chloroplast stroma; GO:0005829,cytosol; GO:0046872,metal ion binding; GO:0070006,metalloaminopeptidase activity; GO:0006508,proteolysis; GO:0003674,molecular_function; GO:0005488,binding; GO:0043167,ion binding; GO:0043169,cation binding; GO:0003824,catalytic activity; GO:0004177,aminopeptidase activity; GO:0008233,peptidase activity; GO:0008235,metalloexopeptid…
IFM89_017557	GO:0048046,apoplast; GO:0004190,aspartic-type endopeptidase activity; GO:0006952,defense response; GO:0006508,proteolysis; GO:0003674,molecular_function; GO:0003824,catalytic activity; GO:0004175,endopeptidase activity; GO:0008233,peptidase activity; GO:0016787,hydrolase activity; GO:0070001,aspartic-type peptidase activity; GO:0140096,catalytic activity, acting on a protein; GO:0006950,response …
IFM89_002575	GO:0005730,nucleolus; GO:0003723,RNA binding; GO:0042255,ribosome assembly; GO:0003674,molecular_function; GO:0003676,nucleic acid binding; GO:0005488,binding; GO:0097159,organic cyclic compound binding; GO:1901363,heterocyclic compound binding; GO:0006996,organelle organization; GO:0008150,biological_process; GO:0009987,cellular process; GO:0016043,cellular component organization; GO:0022607,cel…
IFM89_029133	GO:0000307,cyclin-dependent protein kinase holoenzyme complex; GO:0005737,cytoplasm; GO:0005634,nucleus; GO:0016538,cyclin-dependent protein serine/threonine kinase regulator activity; GO:0051301,cell division; GO:0010444,guard mother cell differentiation; GO:0044772,mitotic cell cycle phase transition; GO:0000079,regulation of cyclin-dependent protein serine/threonine kinase activity; GO:0048316…
IFM89_017076	GO:0009941,chloroplast envelope; GO:0031969,chloroplast membrane; GO:0005737,cytoplasm; GO:0009898,cytoplasmic side of plasma membrane; GO:0005829,cytosol; GO:0005783,endoplasmic reticulum; GO:0005794,Golgi apparatus; GO:0005739,mitochondrion; GO:0000325,plant-type vacuole; GO:0005886,plasma membrane; GO:0009506,plasmodesma; GO:0009536,plastid; GO:0045735,nutrient reservoir activity; GO:0030644,c…
IFM89_018251	GO:0005576,extracellular region; GO:0009505,plant-type cell wall; GO:0020037,heme binding; GO:0046872,metal ion binding; GO:0004601,peroxidase activity; GO:0042744,hydrogen peroxide catabolic process; GO:0006979,response to oxidative stress; GO:0048511,rhythmic process; GO:0003674,molecular_function; GO:0005488,binding; GO:0046906,tetrapyrrole binding; GO:0097159,organic cyclic compound binding; …
IFM89_037840	GO:0005634,nucleus; GO:0003700,DNA-binding transcription factor activity; GO:0000976,transcription cis-regulatory region binding; GO:0019760,glucosinolate metabolic process; GO:0010192,mucilage biosynthetic process; GO:0006355,regulation of DNA-templated transcription; GO:0003674,molecular_function; GO:0140110,transcription regulator activity; GO:0001067,transcription regulatory region nucleic ac…
IFM89_003532	GO:0046914,transition metal ion binding; GO:0046916,cellular transition metal ion homeostasis; GO:0003674,molecular_function; GO:0005488,binding; GO:0043167,ion binding; GO:0043169,cation binding; GO:0046872,metal ion binding; GO:0006873,cellular ion homeostasis; GO:0006875,cellular metal ion homeostasis; GO:0008150,biological_process; GO:0009987,cellular process; GO:0019725,cellular homeostasis;…
IFM89_014745	GO:0005576,extracellular region; GO:0008810,cellulase activity; GO:0071555,cell wall organization; GO:0030245,cellulose catabolic process; GO:0003674,molecular_function; GO:0003824,catalytic activity; GO:0004553,hydrolase activity, hydrolyzing O-glycosyl compounds; GO:0016787,hydrolase activity; GO:0016798,hydrolase activity, acting on glycosyl bonds; GO:0008150,biological_process; GO:0009987,cel…
IFM89_020629	GO:0005634,nucleus; GO:0003700,DNA-binding transcription factor activity; GO:0043565,sequence-specific DNA binding; GO:0000976,transcription cis-regulatory region binding; GO:1900056,negative regulation of leaf senescence; GO:0008361,regulation of cell size; GO:0006355,regulation of DNA-templated transcription; GO:0048364,root development; GO:0003674,molecular_function; GO:0140110,transcription r…
IFM89_016128	GO:0005634,nucleus; GO:0005516,calmodulin binding; GO:0003690,double-stranded DNA binding; GO:0003712,transcription coregulator activity; GO:0006357,regulation of transcription by RNA polymerase II; GO:0006355,regulation of DNA-templated transcription; GO:0003674,molecular_function; GO:0005488,binding; GO:0005515,protein binding; GO:0003676,nucleic acid binding; GO:0003677,DNA binding; GO:0097159…
IFM89_021509	GO:0016021,integral component of membrane; GO:0005575,cellular_component; GO:0016020,membrane; GO:0031224,intrinsic component of membrane; GO:0110165,cellular anatomical entity
IFM89_024851	GO:0000139,Golgi membrane; GO:0016021,integral component of membrane; GO:0005886,plasma membrane; GO:0016760,cellulose synthase (UDP-forming) activity; GO:0051753,mannan synthase activity; GO:0071555,cell wall organization; GO:0030244,cellulose biosynthetic process; GO:0009833,plant-type primary cell wall biogenesis; GO:0003674,molecular_function; GO:0003824,catalytic activity; GO:0008194,UDP-gly…
IFM89_035490	GO:0005887,integral component of plasma membrane; GO:0015301,NA; GO:0008271,secondary active sulfate transmembrane transporter activity; GO:0015293,symporter activity; GO:0003674,molecular_function; GO:0005215,transporter activity; GO:0008509,anion transmembrane transporter activity; GO:0015075,ion transmembrane transporter activity; GO:0015103,inorganic anion transmembrane transporter activity; …
IFM89_013994	GO:0016021,integral component of membrane; GO:0008270,zinc ion binding; GO:0003674,molecular_function; GO:0005488,binding; GO:0043167,ion binding; GO:0043169,cation binding; GO:0046872,metal ion binding; GO:0046914,transition metal ion binding; GO:0005575,cellular_component; GO:0016020,membrane; GO:0031224,intrinsic component of membrane; GO:0110165,cellular anatomical entity
IFM89_010706	GO:0005634,nucleus; GO:0030891,VCB complex; GO:0004518,nuclease activity; GO:0050832,defense response to fungus; GO:0016567,protein ubiquitination; GO:0003674,molecular_function; GO:0003824,catalytic activity; GO:0016787,hydrolase activity; GO:0016788,hydrolase activity, acting on ester bonds; GO:0006950,response to stress; GO:0006952,defense response; GO:0008150,biological_process; GO:0009605,re…
IFM89_003654	GO:0005634,nucleus; GO:0003700,DNA-binding transcription factor activity; GO:0000976,transcription cis-regulatory region binding; GO:0009873,ethylene-activated signaling pathway; GO:0003674,molecular_function; GO:0140110,transcription regulator activity; GO:0001067,transcription regulatory region nucleic acid binding; GO:0003676,nucleic acid binding; GO:0003677,DNA binding; GO:0003690,double-stra…
IFM89_026392	GO:0009507,chloroplast; GO:0005737,cytoplasm; GO:0016491,oxidoreductase activity; GO:0016671,oxidoreductase activity, acting on a sulfur group of donors, disulfide as acceptor; GO:0015035,protein-disulfide reductase activity; GO:0003674,molecular_function; GO:0003824,catalytic activity; GO:0016667,oxidoreductase activity, acting on a sulfur group of donors; GO:0015036,disulfide oxidoreductase act…
IFM89_006966	GO:0005737,cytoplasm; GO:0005634,nucleus; GO:0005886,plasma membrane; GO:0005524,ATP binding; GO:0005509,calcium ion binding; GO:0009931,calcium-dependent protein serine/threonine kinase activity; GO:0005516,calmodulin binding; GO:0004683,calmodulin-dependent protein kinase activity; GO:0106310,protein serine kinase activity; GO:0035556,intracellular signal transduction; GO:0018105,peptidyl-serin…
IFM89_000076	GO:0005634,nucleus; GO:0003700,DNA-binding transcription factor activity; GO:0046983,protein dimerization activity; GO:0043565,sequence-specific DNA binding; GO:0000976,transcription cis-regulatory region binding; GO:0006355,regulation of DNA-templated transcription; GO:0042542,response to hydrogen peroxide; GO:0006979,response to oxidative stress; GO:0009651,response to salt stress; GO:0003674,m…
IFM89_033080	GO:0005737,cytoplasm; GO:0004521,endoribonuclease activity; GO:0003723,RNA binding; GO:0048366,leaf development; GO:0035194,post-transcriptional gene silencing by RNA; GO:0019827,stem cell population maintenance; GO:0003674,molecular_function; GO:0003824,catalytic activity; GO:0004518,nuclease activity; GO:0004519,endonuclease activity; GO:0004540,ribonuclease activity; GO:0016787,hydrolase activ…
IFM89_006261	GO:0009543,chloroplast thylakoid lumen; GO:0004097,catechol oxidase activity; GO:0046872,metal ion binding; GO:0046148,pigment biosynthetic process; GO:0003674,molecular_function; GO:0003824,catalytic activity; GO:0004497,monooxygenase activity; GO:0016491,oxidoreductase activity; GO:0016679,oxidoreductase activity, acting on diphenols and related substances as donors; GO:0016682,oxidoreductase a…
IFM89_018635	GO:0009570,chloroplast stroma; GO:0009535,chloroplast thylakoid membrane; GO:0005524,ATP binding; GO:0016464,chloroplast protein-transporting ATPase activity; GO:0008320,protein transmembrane transporter activity; GO:0017038,protein import; GO:0006605,protein targeting; GO:0071806,protein transmembrane transport; GO:0000166,nucleotide binding; GO:0003674,molecular_function; GO:0005488,binding; GO…
IFM89_011292	GO:0016021,integral component of membrane; GO:0005575,cellular_component; GO:0016020,membrane; GO:0031224,intrinsic component of membrane; GO:0110165,cellular anatomical entity
IFM89_008058	GO:0009501,amyloplast; GO:0009507,chloroplast; GO:0008184,glycogen phosphorylase activity; GO:0102250,linear malto-oligosaccharide phosphorylase activity; GO:0030170,pyridoxal phosphate binding; GO:0102499,SHG alpha-glucan phosphorylase activity; GO:0005975,carbohydrate metabolic process; GO:0003674,molecular_function; GO:0003824,catalytic activity; GO:0004645,1,4-alpha-oligoglucan phosphorylase …
IFM89_018100	GO:0005737,cytoplasm; GO:0005886,plasma membrane; GO:0008289,lipid binding; GO:0007049,cell cycle; GO:0051301,cell division; GO:0003674,molecular_function; GO:0005488,binding; GO:0008150,biological_process; GO:0009987,cellular process; GO:0005575,cellular_component; GO:0005622,intracellular anatomical structure; GO:0110165,cellular anatomical entity; GO:0016020,membrane; GO:0071944,cell periphery
IFM89_012573	GO:0005737,cytoplasm; GO:0005874,microtubule; GO:0005525,GTP binding; GO:0005200,structural constituent of cytoskeleton; GO:0000226,microtubule cytoskeleton organization; GO:0007017,microtubule-based process; GO:0000278,mitotic cell cycle; GO:0000166,nucleotide binding; GO:0003674,molecular_function; GO:0005488,binding; GO:0017076,purine nucleotide binding; GO:0019001,guanyl nucleotide binding; G…
IFM89_001847	GO:0016021,integral component of membrane; GO:0016757,glycosyltransferase activity; GO:0006004,fucose metabolic process; GO:0003674,molecular_function; GO:0003824,catalytic activity; GO:0016740,transferase activity; GO:0005975,carbohydrate metabolic process; GO:0005996,monosaccharide metabolic process; GO:0008150,biological_process; GO:0008152,metabolic process; GO:0019318,hexose metabolic proces…
IFM89_022468	GO:0005829,cytosol; GO:0003999,adenine phosphoribosyltransferase activity; GO:0006168,adenine salvage; GO:0044209,AMP salvage; GO:0006166,purine ribonucleoside salvage; GO:0003674,molecular_function; GO:0003824,catalytic activity; GO:0016740,transferase activity; GO:0016757,glycosyltransferase activity; GO:0016763,pentosyltransferase activity; GO:0106130,purine phosphoribosyltransferase activity;…
IFM89_008462	GO:0016021,integral component of membrane; GO:0016020,membrane; GO:0020037,heme binding; GO:0005506,iron ion binding; GO:0016709,oxidoreductase activity, acting on paired donors, with incorporation or reduction of molecular oxygen, NAD(P)H as one donor, and incorporation of one atom of oxygen; GO:0016717,oxidoreductase activity, acting on paired donors, with oxidation of a pair of donors resultin…
IFM89_007767	GO:0016021,integral component of membrane; GO:0016711,flavonoid 3'-monooxygenase activity; GO:0020037,heme binding; GO:0005506,iron ion binding; GO:0009813,flavonoid biosynthetic process; GO:0003674,molecular_function; GO:0003824,catalytic activity; GO:0004497,monooxygenase activity; GO:0016491,oxidoreductase activity; GO:0016705,oxidoreductase activity, acting on paired donors, with incorporatio…
IFM89_004668	GO:0005576,extracellular region; GO:0033907,beta-D-fucosidase activity; GO:0004565,beta-galactosidase activity; GO:0008422,beta-glucosidase activity; GO:0102483,scopolin beta-glucosidase activity; GO:0005975,carbohydrate metabolic process; GO:0003674,molecular_function; GO:0003824,catalytic activity; GO:0004553,hydrolase activity, hydrolyzing O-glycosyl compounds; GO:0016787,hydrolase activity; G…
IFM89_010966	GO:0016021,integral component of membrane; GO:0005575,cellular_component; GO:0016020,membrane; GO:0031224,intrinsic component of membrane; GO:0110165,cellular anatomical entity
IFM89_037096	GO:0051566,anthocyanidin-3-glucoside rhamnosyltransferase activity; GO:0008194,UDP-glycosyltransferase activity; GO:0009718,anthocyanin-containing compound biosynthetic process; GO:0003674,molecular_function; GO:0003824,catalytic activity; GO:0016740,transferase activity; GO:0016757,glycosyltransferase activity; GO:0016758,hexosyltransferase activity; GO:0008150,biological_process; GO:0008152,met…
IFM89_002006	GO:0005634,nucleus; GO:0003677,DNA binding; GO:0003700,DNA-binding transcription factor activity; GO:0009738,abscisic acid-activated signaling pathway; GO:0045893,positive regulation of DNA-templated transcription; GO:0003674,molecular_function; GO:0003676,nucleic acid binding; GO:0005488,binding; GO:0097159,organic cyclic compound binding; GO:1901363,heterocyclic compound binding; GO:0140110,tra…
IFM89_029287	GO:0046914,transition metal ion binding; GO:0046916,cellular transition metal ion homeostasis; GO:0003674,molecular_function; GO:0005488,binding; GO:0043167,ion binding; GO:0043169,cation binding; GO:0046872,metal ion binding; GO:0006873,cellular ion homeostasis; GO:0006875,cellular metal ion homeostasis; GO:0008150,biological_process; GO:0009987,cellular process; GO:0019725,cellular homeostasis;…
IFM89_029476	GO:0005829,cytosol; GO:0005634,nucleus; GO:0000502,proteasome complex; GO:0008541,proteasome regulatory particle, lid subcomplex; GO:0005198,structural molecule activity; GO:0030163,protein catabolic process; GO:0006511,ubiquitin-dependent protein catabolic process; GO:0003674,molecular_function; GO:0006807,nitrogen compound metabolic process; GO:0008150,biological_process; GO:0008152,metabolic p…
IFM89_006127	GO:0005829,cytosol; GO:0016787,hydrolase activity; GO:0080030,methyl indole-3-acetate esterase activity; GO:0003674,molecular_function; GO:0003824,catalytic activity; GO:0016788,hydrolase activity, acting on ester bonds; GO:0052689,carboxylic ester hydrolase activity; GO:0005575,cellular_component; GO:0005622,intracellular anatomical structure; GO:0005737,cytoplasm; GO:0110165,cellular anatomical…
IFM89_016567	GO:0005634,nucleus; GO:0030891,VCB complex; GO:0004518,nuclease activity; GO:0050832,defense response to fungus; GO:0016567,protein ubiquitination; GO:0003674,molecular_function; GO:0003824,catalytic activity; GO:0016787,hydrolase activity; GO:0016788,hydrolase activity, acting on ester bonds; GO:0006950,response to stress; GO:0006952,defense response; GO:0008150,biological_process; GO:0009605,re…
IFM89_002632	GO:1990726,Lsm1-7-Pat1 complex; GO:0000932,P-body; GO:0003729,mRNA binding; GO:0003723,RNA binding; GO:0000290,deadenylation-dependent decapping of nuclear-transcribed mRNA; GO:0045087,innate immune response; GO:0006397,mRNA processing; GO:0033962,P-body assembly; GO:0003674,molecular_function; GO:0003676,nucleic acid binding; GO:0005488,binding; GO:0097159,organic cyclic compound binding; GO:190…
IFM89_000767	GO:0055028,cortical microtubule; GO:0009737,response to abscisic acid; GO:0008150,biological_process; GO:0009719,response to endogenous stimulus; GO:0009725,response to hormone; GO:0010033,response to organic substance; GO:0033993,response to lipid; GO:0042221,response to chemical; GO:0050896,response to stimulus; GO:0097305,response to alcohol; GO:1901700,response to oxygen-containing compound; …
IFM89_037850	GO:0016021,integral component of membrane; GO:0005575,cellular_component; GO:0016020,membrane; GO:0031224,intrinsic component of membrane; GO:0110165,cellular anatomical entity
novel.6694	GO:0046872,metal ion binding; GO:0003674,molecular_function; GO:0005488,binding; GO:0043167,ion binding; GO:0043169,cation binding
IFM89_026138	GO:0010287,plastoglobule; GO:0015035,protein-disulfide reductase activity; GO:0003674,molecular_function; GO:0003824,catalytic activity; GO:0015036,disulfide oxidoreductase activity; GO:0016491,oxidoreductase activity; GO:0016667,oxidoreductase activity, acting on a sulfur group of donors; GO:0140096,catalytic activity, acting on a protein; GO:0005575,cellular_component; GO:0005622,intracellular …
IFM89_031309	GO:0048046,apoplast; GO:0009507,chloroplast; GO:0009941,chloroplast envelope; GO:0009706,chloroplast inner membrane; GO:0009570,chloroplast stroma; GO:0005737,cytoplasm; GO:0005829,cytosol; GO:0005739,mitochondrion; GO:0000325,plant-type vacuole; GO:0009536,plastid; GO:0009532,plastid stroma; GO:0010319,stromule; GO:0062091,Ycf2/FtsHi complex; GO:0016464,chloroplast protein-transporting ATPase ac…
novel.8120	GO:0005634,nucleus; GO:0000981,DNA-binding transcription factor activity, RNA polymerase II-specific; GO:0000978,RNA polymerase II cis-regulatory region sequence-specific DNA binding; GO:0006357,regulation of transcription by RNA polymerase II; GO:0003674,molecular_function; GO:0003700,DNA-binding transcription factor activity; GO:0140110,transcription regulator activity; GO:0000976,transcription…
IFM89_038746	GO:0009507,chloroplast; GO:0009570,chloroplast stroma; GO:0009534,chloroplast thylakoid; GO:0005737,cytoplasm; GO:0004648,O-phospho-L-serine:2-oxoglutarate aminotransferase activity; GO:0030170,pyridoxal phosphate binding; GO:0006564,L-serine biosynthetic process; GO:0003674,molecular_function; GO:0003824,catalytic activity; GO:0008483,transaminase activity; GO:0016740,transferase activity; GO:00…
IFM89_022307	GO:0031225,anchored component of membrane; GO:0046658,anchored component of plasma membrane; GO:0005576,extracellular region; GO:0005886,plasma membrane; GO:0009536,plastid; GO:0042973,glucan endo-1,3-beta-D-glucosidase activity; GO:0005975,carbohydrate metabolic process; GO:0071555,cell wall organization; GO:0006952,defense response; GO:0003674,molecular_function; GO:0003824,catalytic activity; …
IFM89_016535	GO:0045735,nutrient reservoir activity; GO:0003674,molecular_function
IFM89_018609	GO:0005737,cytoplasm; GO:0045548,phenylalanine ammonia-lyase activity; GO:0009800,cinnamic acid biosynthetic process; GO:0006559,L-phenylalanine catabolic process; GO:0003674,molecular_function; GO:0003824,catalytic activity; GO:0016829,lyase activity; GO:0016840,carbon-nitrogen lyase activity; GO:0016841,ammonia-lyase activity; GO:0006082,organic acid metabolic process; GO:0006725,cellular aroma…
IFM89_000580	GO:0005737,cytoplasm; GO:0016604,nuclear body; GO:0005634,nucleus; GO:0061608,nuclear import signal receptor activity; GO:0042803,protein homodimerization activity; GO:0010018,far-red light signaling pathway; GO:0031048,small non-coding RNA-dependent heterochromatin formation; GO:0051457,maintenance of protein location in nucleus; GO:0009640,photomorphogenesis; GO:0045893,positive regulation of D…
IFM89_029065	GO:0048046,apoplast; GO:0005794,Golgi apparatus; GO:0004553,hydrolase activity, hydrolyzing O-glycosyl compounds; GO:0030247,polysaccharide binding; GO:0016762,xyloglucan:xyloglucosyl transferase activity; GO:0042546,cell wall biogenesis; GO:0071555,cell wall organization; GO:0010411,xyloglucan metabolic process; GO:0003674,molecular_function; GO:0003824,catalytic activity; GO:0016787,hydrolase a…
IFM89_009083	GO:0005737,cytoplasm; GO:0031417,NatC complex; GO:0004596,peptide alpha-N-acetyltransferase activity; GO:0017196,N-terminal peptidyl-methionine acetylation; GO:0003674,molecular_function; GO:0003824,catalytic activity; GO:0008080,N-acetyltransferase activity; GO:0016407,acetyltransferase activity; GO:0016410,N-acyltransferase activity; GO:0016740,transferase activity; GO:0016746,acyltransferase a…
IFM89_033162	GO:0005634,nucleus; GO:0005524,ATP binding; GO:0046872,metal ion binding; GO:0004652,polynucleotide adenylyltransferase activity; GO:0003723,RNA binding; GO:0006378,mRNA polyadenylation; GO:0043631,RNA polyadenylation; GO:0000166,nucleotide binding; GO:0003674,molecular_function; GO:0005488,binding; GO:0017076,purine nucleotide binding; GO:0030554,adenyl nucleotide binding; GO:0032553,ribonucleot…
IFM89_032849	GO:0046872,metal ion binding; GO:0031624,ubiquitin conjugating enzyme binding; GO:0004842,ubiquitin-protein transferase activity; GO:0048437,floral organ development; GO:0008285,negative regulation of cell population proliferation; GO:0046621,negative regulation of organ growth; GO:1900057,positive regulation of leaf senescence; GO:0051865,protein autoubiquitination; GO:0016567,protein ubiquitina…
IFM89_016480	GO:0005737,cytoplasm; GO:0051537,2 iron, 2 sulfur cluster binding; GO:0097573,glutathione oxidoreductase activity; GO:0046872,metal ion binding; GO:0000122,negative regulation of transcription by RNA polymerase II; GO:0003674,molecular_function; GO:0005488,binding; GO:0051536,iron-sulfur cluster binding; GO:0051540,metal cluster binding; GO:0003824,catalytic activity; GO:0015035,protein-disulfide…
IFM89_024488	GO:0005737,cytoplasm; GO:0005886,plasma membrane; GO:0008289,lipid binding; GO:0007049,cell cycle; GO:0051301,cell division; GO:0003674,molecular_function; GO:0005488,binding; GO:0008150,biological_process; GO:0009987,cellular process; GO:0005575,cellular_component; GO:0005622,intracellular anatomical structure; GO:0110165,cellular anatomical entity; GO:0016020,membrane; GO:0071944,cell periphery
IFM89_019462	GO:0009507,chloroplast; GO:0033730,arogenate dehydrogenase (NADP+) activity; GO:0008977,prephenate dehydrogenase (NAD+) activity; GO:0004665,prephenate dehydrogenase (NADP+) activity; GO:0006571,tyrosine biosynthetic process; GO:0003674,molecular_function; GO:0003824,catalytic activity; GO:0016491,oxidoreductase activity; GO:0016627,oxidoreductase activity, acting on the CH-CH group of donors; GO…
IFM89_008136	GO:0009507,chloroplast; GO:0005886,plasma membrane; GO:0005524,ATP binding; GO:0005975,carbohydrate metabolic process; GO:0006633,fatty acid biosynthetic process; GO:0042128,nitrate assimilation; GO:0000166,nucleotide binding; GO:0003674,molecular_function; GO:0005488,binding; GO:0017076,purine nucleotide binding; GO:0030554,adenyl nucleotide binding; GO:0032553,ribonucleotide binding; GO:0032555…
IFM89_034548	GO:0005634,nucleus; GO:0003677,DNA binding; GO:0003700,DNA-binding transcription factor activity; GO:0006952,defense response; GO:0009873,ethylene-activated signaling pathway; GO:0003674,molecular_function; GO:0003676,nucleic acid binding; GO:0005488,binding; GO:0097159,organic cyclic compound binding; GO:1901363,heterocyclic compound binding; GO:0140110,transcription regulator activity; GO:00069…
IFM89_022539	GO:0005634,nucleus; GO:0005524,ATP binding; GO:0032502,developmental process; GO:0006355,regulation of DNA-templated transcription; GO:0006351,DNA-templated transcription; GO:0000166,nucleotide binding; GO:0003674,molecular_function; GO:0005488,binding; GO:0017076,purine nucleotide binding; GO:0030554,adenyl nucleotide binding; GO:0032553,ribonucleotide binding; GO:0032555,purine ribonucleotide b…
IFM89_010632	GO:0005634,nucleus; GO:0005524,ATP binding; GO:0019788,NEDD8 transferase activity; GO:0045116,protein neddylation; GO:0009733,response to auxin; GO:0000166,nucleotide binding; GO:0003674,molecular_function; GO:0005488,binding; GO:0017076,purine nucleotide binding; GO:0030554,adenyl nucleotide binding; GO:0032553,ribonucleotide binding; GO:0032555,purine ribonucleotide binding; GO:0032559,adenyl r…
IFM89_037388	GO:0005737,cytoplasm; GO:0008168,methyltransferase activity; GO:0032259,methylation; GO:0003674,molecular_function; GO:0003824,catalytic activity; GO:0016740,transferase activity; GO:0016741,transferase activity, transferring one-carbon groups; GO:0008150,biological_process; GO:0008152,metabolic process; GO:0005575,cellular_component; GO:0005622,intracellular anatomical structure; GO:0110165,cell…
novel.4438	GO:0005829,cytosol; GO:0005524,ATP binding; GO:0004831,tyrosine-tRNA ligase activity; GO:0006418,tRNA aminoacylation for protein translation; GO:0000166,nucleotide binding; GO:0003674,molecular_function; GO:0005488,binding; GO:0017076,purine nucleotide binding; GO:0030554,adenyl nucleotide binding; GO:0032553,ribonucleotide binding; GO:0032555,purine ribonucleotide binding; GO:0032559,adenyl ribo…
IFM89_015844	GO:0005737,cytoplasm; GO:0005634,nucleus; GO:0051537,2 iron, 2 sulfur cluster binding; GO:0097573,glutathione oxidoreductase activity; GO:0046872,metal ion binding; GO:0000122,negative regulation of transcription by RNA polymerase II; GO:0003674,molecular_function; GO:0005488,binding; GO:0051536,iron-sulfur cluster binding; GO:0051540,metal cluster binding; GO:0003824,catalytic activity; GO:00150…
IFM89_018751	GO:0050373,UDP-arabinose 4-epimerase activity; GO:0003978,UDP-glucose 4-epimerase activity; GO:0045227,capsule polysaccharide biosynthetic process; GO:0071555,cell wall organization; GO:0006012,galactose metabolic process; GO:0033358,UDP-L-arabinose biosynthetic process; GO:0003674,molecular_function; GO:0003824,catalytic activity; GO:0016853,isomerase activity; GO:0016854,racemase and epimerase …
IFM89_008685	GO:0005829,cytosol; GO:0016021,integral component of membrane; GO:0005886,plasma membrane; GO:0005524,ATP binding; GO:0106310,protein serine kinase activity; GO:0004674,protein serine/threonine kinase activity; GO:0042742,defense response to bacterium; GO:0006468,protein phosphorylation; GO:0000166,nucleotide binding; GO:0003674,molecular_function; GO:0005488,binding; GO:0017076,purine nucleotide…
IFM89_037117	GO:0009815,1-aminocyclopropane-1-carboxylate oxidase activity; GO:0031418,L-ascorbic acid binding; GO:0046872,metal ion binding; GO:0016705,oxidoreductase activity, acting on paired donors, with incorporation or reduction of molecular oxygen; GO:0009693,ethylene biosynthetic process; GO:0009835,fruit ripening; GO:0003674,molecular_function; GO:0003824,catalytic activity; GO:0004497,monooxygenase …
IFM89_029861	GO:0046872,metal ion binding; GO:0003674,molecular_function; GO:0005488,binding; GO:0043167,ion binding; GO:0043169,cation binding
IFM89_038112	GO:0005829,cytosol; GO:2000762,regulation of phenylpropanoid metabolic process; GO:0006725,cellular aromatic compound metabolic process; GO:0008150,biological_process; GO:0008152,metabolic process; GO:0009698,phenylpropanoid metabolic process; GO:0009987,cellular process; GO:0019222,regulation of metabolic process; GO:0019748,secondary metabolic process; GO:0031323,regulation of cellular metaboli…
IFM89_039622	GO:0005829,cytosol; GO:0005739,mitochondrion; GO:0005886,plasma membrane; GO:0050897,cobalt ion binding; GO:0045454,cell redox homeostasis; GO:0003674,molecular_function; GO:0005488,binding; GO:0043167,ion binding; GO:0043169,cation binding; GO:0046872,metal ion binding; GO:0046914,transition metal ion binding; GO:0008150,biological_process; GO:0009987,cellular process; GO:0019725,cellular homeos…
IFM89_023647	GO:0004013,adenosylhomocysteinase activity; GO:0006730,one-carbon metabolic process; GO:0003674,molecular_function; GO:0003824,catalytic activity; GO:0016787,hydrolase activity; GO:0016801,hydrolase activity, acting on ether bonds; GO:0016802,trialkylsulfonium hydrolase activity; GO:0008150,biological_process; GO:0008152,metabolic process; GO:0009987,cellular process; GO:0044237,cellular metaboli…
IFM89_033889	GO:0016021,integral component of membrane; GO:0005886,plasma membrane; GO:0006979,response to oxidative stress; GO:0006950,response to stress; GO:0008150,biological_process; GO:0050896,response to stimulus; GO:0005575,cellular_component; GO:0016020,membrane; GO:0031224,intrinsic component of membrane; GO:0110165,cellular anatomical entity; GO:0071944,cell periphery
novel.593	GO:0016021,integral component of membrane; GO:0005886,plasma membrane; GO:0005524,ATP binding; GO:0106310,protein serine kinase activity; GO:0004674,protein serine/threonine kinase activity; GO:0006468,protein phosphorylation; GO:0000166,nucleotide binding; GO:0003674,molecular_function; GO:0005488,binding; GO:0017076,purine nucleotide binding; GO:0030554,adenyl nucleotide binding; GO:0032553,rib…
IFM89_018004	GO:0010181,FMN binding; GO:0016491,oxidoreductase activity; GO:0006633,fatty acid biosynthetic process; GO:0031408,oxylipin biosynthetic process; GO:0000166,nucleotide binding; GO:0003674,molecular_function; GO:0005488,binding; GO:0032553,ribonucleotide binding; GO:0036094,small molecule binding; GO:0043167,ion binding; GO:0043168,anion binding; GO:0097159,organic cyclic compound binding; GO:0097…
IFM89_002698	GO:0005829,cytosol; GO:0005886,plasma membrane; GO:0009536,plastid; GO:0019210,kinase inhibitor activity; GO:0009742,brassinosteroid mediated signaling pathway; GO:0006629,lipid metabolic process; GO:0009741,response to brassinosteroid; GO:0003674,molecular_function; GO:0004857,enzyme inhibitor activity; GO:0019207,kinase regulator activity; GO:0030234,enzyme regulator activity; GO:0098772,molecu…
IFM89_032024	GO:0016021,integral component of membrane; GO:0031966,mitochondrial membrane; GO:0005739,mitochondrion; GO:0005886,plasma membrane; GO:0140618,ferric-chelate reductase (NADH) activity; GO:0000293,ferric-chelate reductase activity; GO:0046872,metal ion binding; GO:0006811,ion transport; GO:0003674,molecular_function; GO:0003824,catalytic activity; GO:0016491,oxidoreductase activity; GO:0016722,oxi…
IFM89_004629	GO:0005829,cytosol; GO:0005576,extracellular region; GO:0005794,Golgi apparatus; GO:0009506,plasmodesma; GO:0052691,UDP-arabinopyranose mutase activity; GO:0071555,cell wall organization; GO:0030244,cellulose biosynthetic process; GO:0009832,plant-type cell wall biogenesis; GO:0006486,protein glycosylation; GO:0033356,UDP-L-arabinose metabolic process; GO:0003674,molecular_function; GO:0003824,ca…
IFM89_034758	GO:0005737,cytoplasm; GO:0045548,phenylalanine ammonia-lyase activity; GO:0009800,cinnamic acid biosynthetic process; GO:0006559,L-phenylalanine catabolic process; GO:0003674,molecular_function; GO:0003824,catalytic activity; GO:0016829,lyase activity; GO:0016840,carbon-nitrogen lyase activity; GO:0016841,ammonia-lyase activity; GO:0006082,organic acid metabolic process; GO:0006725,cellular aroma…
IFM89_001149	GO:0016021,integral component of membrane; GO:0005575,cellular_component; GO:0016020,membrane; GO:0031224,intrinsic component of membrane; GO:0110165,cellular anatomical entity
IFM89_015177	GO:0016021,integral component of membrane; GO:0000325,plant-type vacuole; GO:0008289,lipid binding; GO:0046872,metal ion binding; GO:0006869,lipid transport; GO:0003674,molecular_function; GO:0005488,binding; GO:0043167,ion binding; GO:0043169,cation binding; GO:0006810,transport; GO:0008150,biological_process; GO:0010876,lipid localization; GO:0033036,macromolecule localization; GO:0051179,local…
novel.7131	GO:0016021,integral component of membrane; GO:0005575,cellular_component; GO:0016020,membrane; GO:0031224,intrinsic component of membrane; GO:0110165,cellular anatomical entity
IFM89_027461	GO:0009570,chloroplast stroma; GO:0009536,plastid; GO:0010258,NADH dehydrogenase complex (plastoquinone) assembly; GO:0008150,biological_process; GO:0009987,cellular process; GO:0010257,NADH dehydrogenase complex assembly; GO:0010275,NAD(P)H dehydrogenase complex assembly; GO:0016043,cellular component organization; GO:0022607,cellular component assembly; GO:0043933,protein-containing complex org…
IFM89_010014	GO:0046872,metal ion binding; GO:0061630,ubiquitin protein ligase activity; GO:0009630,gravitropism; GO:0010274,hydrotropism; GO:0016567,protein ubiquitination; GO:0048364,root development; GO:0003674,molecular_function; GO:0005488,binding; GO:0043167,ion binding; GO:0043169,cation binding; GO:0003824,catalytic activity; GO:0004842,ubiquitin-protein transferase activity; GO:0016740,transferase ac…
IFM89_030785	GO:0005737,cytoplasm; GO:0005524,ATP binding; GO:0004672,protein kinase activity; GO:0106310,protein serine kinase activity; GO:0004674,protein serine/threonine kinase activity; GO:0004712,protein serine/threonine/tyrosine kinase activity; GO:0004713,protein tyrosine kinase activity; GO:0006468,protein phosphorylation; GO:0045995,regulation of embryonic development; GO:0010344,seed oilbody biogen…
IFM89_011511	GO:0009507,chloroplast; GO:0052656,L-isoleucine transaminase activity; GO:0052654,L-leucine transaminase activity; GO:0050048,L-leucine:2-oxoglutarate aminotransferase activity; GO:0052655,L-valine transaminase activity; GO:0009097,isoleucine biosynthetic process; GO:0009098,leucine biosynthetic process; GO:0009099,valine biosynthetic process; GO:0003674,molecular_function; GO:0003824,catalytic a…
IFM89_009468	GO:0016021,integral component of membrane; GO:0016020,membrane; GO:0005634,nucleus; GO:0000325,plant-type vacuole; GO:0015297,antiporter activity; GO:0022857,transmembrane transporter activity; GO:0042910,xenobiotic transmembrane transporter activity; GO:1990961,xenobiotic detoxification by transmembrane export across the plasma membrane; GO:0003674,molecular_function; GO:0005215,transporter acti…
IFM89_026031	GO:0005634,nucleus; GO:0003700,DNA-binding transcription factor activity; GO:0043565,sequence-specific DNA binding; GO:0006952,defense response; GO:0006351,DNA-templated transcription; GO:0003674,molecular_function; GO:0140110,transcription regulator activity; GO:0003676,nucleic acid binding; GO:0003677,DNA binding; GO:0005488,binding; GO:0097159,organic cyclic compound binding; GO:1901363,hetero…
IFM89_039147	GO:0016567,protein ubiquitination; GO:0006807,nitrogen compound metabolic process; GO:0008150,biological_process; GO:0008152,metabolic process; GO:0019538,protein metabolic process; GO:0032446,protein modification by small protein conjugation; GO:0036211,protein modification process; GO:0043170,macromolecule metabolic process; GO:0043412,macromolecule modification; GO:0044238,primary metabolic pr…
IFM89_014053	GO:0004177,aminopeptidase activity; GO:0008237,metallopeptidase activity; GO:0008270,zinc ion binding; GO:0006508,proteolysis; GO:0003674,molecular_function; GO:0003824,catalytic activity; GO:0008233,peptidase activity; GO:0008238,exopeptidase activity; GO:0016787,hydrolase activity; GO:0140096,catalytic activity, acting on a protein; GO:0005488,binding; GO:0043167,ion binding; GO:0043169,cation …
IFM89_039815	GO:0036467,5-hydroxy-L-tryptophan decarboxylase activity; GO:0036468,L-dopa decarboxylase activity; GO:0030170,pyridoxal phosphate binding; GO:0004837,tyrosine decarboxylase activity; GO:0006520,cellular amino acid metabolic process; GO:0003674,molecular_function; GO:0003824,catalytic activity; GO:0004058,aromatic-L-amino-acid decarboxylase activity; GO:0016829,lyase activity; GO:0016830,carbon-c…
IFM89_023101	GO:0030786,(RS)-norcoclaurine 6-O-methyltransferase activity; GO:0008171,O-methyltransferase activity; GO:0046983,protein dimerization activity; GO:0032259,methylation; GO:0003674,molecular_function; GO:0003824,catalytic activity; GO:0008168,methyltransferase activity; GO:0008757,S-adenosylmethionine-dependent methyltransferase activity; GO:0016740,transferase activity; GO:0016741,transferase act…
IFM89_016616	GO:0000155,phosphorelay sensor kinase activity; GO:0009881,photoreceptor activity; GO:0042803,protein homodimerization activity; GO:0009584,detection of visible light; GO:0017006,protein-tetrapyrrole linkage; GO:0009585,red, far-red light phototransduction; GO:0006355,regulation of DNA-templated transcription; GO:0003674,molecular_function; GO:0003824,catalytic activity; GO:0004672,protein kinase…
IFM89_038314	GO:0016021,integral component of membrane; GO:0005575,cellular_component; GO:0016020,membrane; GO:0031224,intrinsic component of membrane; GO:0110165,cellular anatomical entity
IFM89_015541	GO:0005681,spliceosomal complex; GO:0046872,metal ion binding; GO:0030628,pre-mRNA 3'-splice site binding; GO:0000398,mRNA splicing, via spliceosome; GO:0003674,molecular_function; GO:0005488,binding; GO:0043167,ion binding; GO:0043169,cation binding; GO:0003676,nucleic acid binding; GO:0003723,RNA binding; GO:0036002,pre-mRNA binding; GO:0097159,organic cyclic compound binding; GO:1901363,hetero…
IFM89_023100	GO:0005789,endoplasmic reticulum membrane; GO:0016021,integral component of membrane; GO:0020037,heme binding; GO:0005506,iron ion binding; GO:0050593,N-methylcoclaurine 3'-monooxygenase activity; GO:0019438,aromatic compound biosynthetic process; GO:1901362,organic cyclic compound biosynthetic process; GO:0003674,molecular_function; GO:0005488,binding; GO:0046906,tetrapyrrole binding; GO:0097159…
IFM89_010054	GO:0016021,integral component of membrane; GO:0020037,heme binding; GO:0005506,iron ion binding; GO:0004497,monooxygenase activity; GO:0016705,oxidoreductase activity, acting on paired donors, with incorporation or reduction of molecular oxygen; GO:0019438,aromatic compound biosynthetic process; GO:0009699,phenylpropanoid biosynthetic process; GO:0003674,molecular_function; GO:0005488,binding; GO…
IFM89_003751	GO:0005634,nucleus; GO:0003700,DNA-binding transcription factor activity; GO:0046983,protein dimerization activity; GO:0043565,sequence-specific DNA binding; GO:0006355,regulation of DNA-templated transcription; GO:0003674,molecular_function; GO:0140110,transcription regulator activity; GO:0005488,binding; GO:0005515,protein binding; GO:0003676,nucleic acid binding; GO:0003677,DNA binding; GO:009…
IFM89_022703	GO:0005789,endoplasmic reticulum membrane; GO:0016021,integral component of membrane; GO:0005634,nucleus; GO:0003700,DNA-binding transcription factor activity; GO:0000976,transcription cis-regulatory region binding; GO:0070301,cellular response to hydrogen peroxide; GO:0010150,leaf senescence; GO:0031930,mitochondria-nucleus signaling pathway; GO:0045893,positive regulation of DNA-templated trans…
novel.2349	GO:0009507,chloroplast; GO:0043231,intracellular membrane-bounded organelle; GO:0102965,alcohol-forming fatty acyl-CoA reductase activity; GO:0080019,fatty-acyl-CoA reductase (alcohol-forming) activity; GO:0016628,oxidoreductase activity, acting on the CH-CH group of donors, NAD or NADP as acceptor; GO:1903175,fatty alcohol biosynthetic process; GO:0035336,long-chain fatty-acyl-CoA metabolic proc…
IFM89_039615	GO:0005737,cytoplasm; GO:0016621,cinnamoyl-CoA reductase activity; GO:0000166,nucleotide binding; GO:0007623,circadian rhythm; GO:0010597,green leaf volatile biosynthetic process; GO:0009809,lignin biosynthetic process; GO:0009699,phenylpropanoid biosynthetic process; GO:0003674,molecular_function; GO:0003824,catalytic activity; GO:0016491,oxidoreductase activity; GO:0016620,oxidoreductase activi…
IFM89_018355	GO:0005199,structural constituent of cell wall; GO:0009664,plant-type cell wall organization; GO:0003674,molecular_function; GO:0005198,structural molecule activity; GO:0008150,biological_process; GO:0009987,cellular process; GO:0016043,cellular component organization; GO:0045229,external encapsulating structure organization; GO:0071554,cell wall organization or biogenesis; GO:0071555,cell wall o…
IFM89_037826	GO:0009507,chloroplast; GO:0005739,mitochondrion; GO:0009536,plastid; GO:0015935,small ribosomal subunit; GO:0003735,structural constituent of ribosome; GO:0006412,translation; GO:0003674,molecular_function; GO:0005198,structural molecule activity; GO:0006518,peptide metabolic process; GO:0006807,nitrogen compound metabolic process; GO:0008150,biological_process; GO:0008152,metabolic process; GO:…
IFM89_030333	GO:0005737,cytoplasm; GO:0008886,glyceraldehyde-3-phosphate dehydrogenase (NADP+) (non-phosphorylating) activity; GO:0003674,molecular_function; GO:0003824,catalytic activity; GO:0016491,oxidoreductase activity; GO:0016620,oxidoreductase activity, acting on the aldehyde or oxo group of donors, NAD or NADP as acceptor; GO:0016903,oxidoreductase activity, acting on the aldehyde or oxo group of dono…
IFM89_007361	GO:0005829,cytosol; GO:0071949,FAD binding; GO:0004489,methylenetetrahydrofolate reductase (NAD(P)H) activity; GO:0106312,methylenetetrahydrofolate reductase NADH activity; GO:0106313,methylenetetrahydrofolate reductase NADPH activity; GO:0009086,methionine biosynthetic process; GO:0035999,tetrahydrofolate interconversion; GO:0000166,nucleotide binding; GO:0003674,molecular_function; GO:0005488,b…
IFM89_033148	GO:0006952,defense response; GO:0006950,response to stress; GO:0008150,biological_process; GO:0050896,response to stimulus
IFM89_035697	GO:0005634,nucleus; GO:0019005,SCF ubiquitin ligase complex; GO:0010011,auxin binding; GO:0000822,inositol hexakisphosphate binding; GO:0009734,auxin-activated signaling pathway; GO:0016567,protein ubiquitination; GO:0031146,SCF-dependent proteasomal ubiquitin-dependent protein catabolic process; GO:0003674,molecular_function; GO:0005488,binding; GO:0042562,hormone binding; GO:0036094,small molec…
IFM89_038459	GO:0005634,nucleus; GO:0005524,ATP binding; GO:0016887,ATP hydrolysis activity; GO:0003723,RNA binding; GO:0003724,RNA helicase activity; GO:0000398,mRNA splicing, via spliceosome; GO:0000166,nucleotide binding; GO:0003674,molecular_function; GO:0005488,binding; GO:0017076,purine nucleotide binding; GO:0030554,adenyl nucleotide binding; GO:0032553,ribonucleotide binding; GO:0032555,purine ribonuc…
IFM89_019880	GO:0005783,endoplasmic reticulum; GO:0004190,aspartic-type endopeptidase activity; GO:0070001,aspartic-type peptidase activity; GO:0003677,DNA binding; GO:0006508,proteolysis; GO:0009737,response to abscisic acid; GO:0009414,response to water deprivation; GO:0009627,systemic acquired resistance; GO:0003674,molecular_function; GO:0003824,catalytic activity; GO:0004175,endopeptidase activity; GO:00…
IFM89_014779	GO:0005871,kinesin complex; GO:0005874,microtubule; GO:0005739,mitochondrion; GO:0005524,ATP binding; GO:0016887,ATP hydrolysis activity; GO:0046872,metal ion binding; GO:0008017,microtubule binding; GO:0003777,microtubule motor activity; GO:0007018,microtubule-based movement; GO:0031347,regulation of defense response; GO:0000166,nucleotide binding; GO:0003674,molecular_function; GO:0005488,bindi…
IFM89_025630	GO:0005829,cytosol; GO:0004476,mannose-6-phosphate isomerase activity; GO:0008270,zinc ion binding; GO:0005975,carbohydrate metabolic process; GO:0009793,embryo development ending in seed dormancy; GO:0009298,GDP-mannose biosynthetic process; GO:0046686,response to cadmium ion; GO:0032025,response to cobalt ion; GO:0033591,response to L-ascorbic acid; GO:0009416,response to light stimulus; GO:001…
IFM89_037011	GO:0102455,anthocyanidin 3-O-glucoside 2''-O-glucosyltransferase activity; GO:0016758,hexosyltransferase activity; GO:0008194,UDP-glycosyltransferase activity; GO:0009718,anthocyanin-containing compound biosynthetic process; GO:0043473,pigmentation; GO:0003674,molecular_function; GO:0003824,catalytic activity; GO:0016740,transferase activity; GO:0016757,glycosyltransferase activity; GO:0008150,bi…
IFM89_020866	GO:0005634,nucleus; GO:0003712,transcription coregulator activity; GO:0009740,gibberellic acid mediated signaling pathway; GO:0003674,molecular_function; GO:0140110,transcription regulator activity; GO:0007154,cell communication; GO:0007165,signal transduction; GO:0008150,biological_process; GO:0009719,response to endogenous stimulus; GO:0009725,response to hormone; GO:0009739,response to gibbere…
IFM89_029976	GO:0016021,integral component of membrane; GO:0004142,diacylglycerol cholinephosphotransferase activity; GO:0046470,phosphatidylcholine metabolic process; GO:0003674,molecular_function; GO:0003824,catalytic activity; GO:0016740,transferase activity; GO:0016772,transferase activity, transferring phosphorus-containing groups; GO:0016780,phosphotransferase activity, for other substituted phosphate g…
novel.2751	GO:0005739,mitochondrion; GO:0034387,4-aminobutyrate:pyruvate transaminase activity; GO:0102351,gamma-aminobutyrate transaminase (glyoxylate dependent) activity; GO:0030170,pyridoxal phosphate binding; GO:0003674,molecular_function; GO:0003824,catalytic activity; GO:0003867,4-aminobutyrate transaminase activity; GO:0008483,transaminase activity; GO:0016740,transferase activity; GO:0016769,transfe…
IFM89_030786	GO:0005737,cytoplasm; GO:0005524,ATP binding; GO:0004672,protein kinase activity; GO:0106310,protein serine kinase activity; GO:0004674,protein serine/threonine kinase activity; GO:0004712,protein serine/threonine/tyrosine kinase activity; GO:0004713,protein tyrosine kinase activity; GO:0006468,protein phosphorylation; GO:0045995,regulation of embryonic development; GO:0010344,seed oilbody biogen…
IFM89_026431	GO:0005634,nucleus; GO:0003677,DNA binding; GO:0003700,DNA-binding transcription factor activity; GO:0042803,protein homodimerization activity; GO:0010078,maintenance of root meristem identity; GO:0045893,positive regulation of DNA-templated transcription; GO:0006355,regulation of DNA-templated transcription; GO:0048364,root development; GO:0010479,stele development; GO:0010089,xylem development;…
IFM89_002801	GO:0005737,cytoplasm; GO:0030782,(S)-tetrahydroprotoberberine N-methyltransferase activity; GO:0032259,methylation; GO:0003674,molecular_function; GO:0003824,catalytic activity; GO:0008168,methyltransferase activity; GO:0008757,S-adenosylmethionine-dependent methyltransferase activity; GO:0016740,transferase activity; GO:0016741,transferase activity, transferring one-carbon groups; GO:0008150,bio…
IFM89_033569	GO:0005829,cytosol; GO:0004838,L-tyrosine:2-oxoglutarate aminotransferase activity; GO:0030170,pyridoxal phosphate binding; GO:0006572,tyrosine catabolic process; GO:0010189,vitamin E biosynthetic process; GO:0003674,molecular_function; GO:0003824,catalytic activity; GO:0008483,transaminase activity; GO:0016740,transferase activity; GO:0016769,transferase activity, transferring nitrogenous groups…
IFM89_006443	GO:0003723,RNA binding; GO:0003674,molecular_function; GO:0003676,nucleic acid binding; GO:0005488,binding; GO:0097159,organic cyclic compound binding; GO:1901363,heterocyclic compound binding
IFM89_016697	GO:0005741,mitochondrial outer membrane; GO:0046930,pore complex; GO:0015288,porin activity; GO:0008308,voltage-gated anion channel activity; GO:0040008,regulation of growth; GO:0003674,molecular_function; GO:0005215,transporter activity; GO:0015267,channel activity; GO:0022803,passive transmembrane transporter activity; GO:0022829,wide pore channel activity; GO:0022857,transmembrane transporter …
IFM89_028764	GO:0000139,Golgi membrane; GO:0016021,integral component of membrane; GO:0005886,plasma membrane; GO:0016760,cellulose synthase (UDP-forming) activity; GO:0051753,mannan synthase activity; GO:0071555,cell wall organization; GO:0030244,cellulose biosynthetic process; GO:0009833,plant-type primary cell wall biogenesis; GO:0003674,molecular_function; GO:0003824,catalytic activity; GO:0008194,UDP-gly…
IFM89_031971	GO:0016021,integral component of membrane; GO:0020037,heme binding; GO:0005506,iron ion binding; GO:0016710,trans-cinnamate 4-monooxygenase activity; GO:0003674,molecular_function; GO:0005488,binding; GO:0046906,tetrapyrrole binding; GO:0097159,organic cyclic compound binding; GO:1901363,heterocyclic compound binding; GO:0043167,ion binding; GO:0043169,cation binding; GO:0046872,metal ion binding…
IFM89_019641	GO:0016567,protein ubiquitination; GO:0006807,nitrogen compound metabolic process; GO:0008150,biological_process; GO:0008152,metabolic process; GO:0019538,protein metabolic process; GO:0032446,protein modification by small protein conjugation; GO:0036211,protein modification process; GO:0043170,macromolecule metabolic process; GO:0043412,macromolecule modification; GO:0044238,primary metabolic pr…
IFM89_023651	GO:0005829,cytosol; GO:0008430,selenium binding; GO:0010197,polar nucleus fusion; GO:0003674,molecular_function; GO:0005488,binding; GO:0000741,karyogamy; GO:0006996,organelle organization; GO:0006997,nucleus organization; GO:0007275,multicellular organism development; GO:0008150,biological_process; GO:0009553,embryo sac development; GO:0009559,embryo sac central cell differentiation; GO:0009561,…
IFM89_012660	GO:0005789,endoplasmic reticulum membrane; GO:0016021,integral component of membrane; GO:0016788,hydrolase activity, acting on ester bonds; GO:0015031,protein transport; GO:0003674,molecular_function; GO:0003824,catalytic activity; GO:0016787,hydrolase activity; GO:0006810,transport; GO:0008104,protein localization; GO:0008150,biological_process; GO:0009987,cellular process; GO:0033036,macromolec…
IFM89_023660	GO:0005737,cytoplasm; GO:0005634,nucleus; GO:0003700,DNA-binding transcription factor activity; GO:0000978,RNA polymerase II cis-regulatory region sequence-specific DNA binding; GO:0034605,cellular response to heat; GO:0006357,regulation of transcription by RNA polymerase II; GO:0003674,molecular_function; GO:0140110,transcription regulator activity; GO:0000976,transcription cis-regulatory region…
IFM89_003847	GO:0005634,nucleus; GO:0043565,sequence-specific DNA binding; GO:1902265,abscisic acid homeostasis; GO:0009738,abscisic acid-activated signaling pathway; GO:0010150,leaf senescence; GO:0031155,regulation of reproductive fruiting body development; GO:0006355,regulation of DNA-templated transcription; GO:0009737,response to abscisic acid; GO:0009646,response to absence of light; GO:0003674,molecula…
IFM89_030686	GO:0016021,integral component of membrane; GO:0016020,membrane; GO:0000325,plant-type vacuole; GO:0005886,plasma membrane; GO:0009506,plasmodesma; GO:0005774,vacuolar membrane; GO:0005773,vacuole; GO:0005509,calcium ion binding; GO:0015369,calcium:proton antiporter activity; GO:0005432,calcium:sodium antiporter activity; GO:0003729,mRNA binding; GO:0055074,calcium ion homeostasis; GO:0070588,calc…
IFM89_002797	GO:0050474,(S)-norcoclaurine synthase activity; GO:0046872,metal ion binding; GO:0016491,oxidoreductase activity; GO:0009820,alkaloid metabolic process; GO:0003674,molecular_function; GO:0003824,catalytic activity; GO:0016829,lyase activity; GO:0016835,carbon-oxygen lyase activity; GO:0016836,hydro-lyase activity; GO:0005488,binding; GO:0043167,ion binding; GO:0043169,cation binding; GO:0006807,n…
IFM89_003734	GO:0009507,chloroplast; GO:0003849,3-deoxy-7-phosphoheptulonate synthase activity; GO:0046872,metal ion binding; GO:0009073,aromatic amino acid family biosynthetic process; GO:0008652,cellular amino acid biosynthetic process; GO:0009423,chorismate biosynthetic process; GO:0010597,green leaf volatile biosynthetic process; GO:0003674,molecular_function; GO:0003824,catalytic activity; GO:0016740,tra…
novel.3049	GO:0016021,integral component of membrane; GO:0005575,cellular_component; GO:0016020,membrane; GO:0031224,intrinsic component of membrane; GO:0110165,cellular anatomical entity
IFM89_007051	GO:0005634,nucleus; GO:0019005,SCF ubiquitin ligase complex; GO:0010011,auxin binding; GO:0000822,inositol hexakisphosphate binding; GO:0009734,auxin-activated signaling pathway; GO:0016567,protein ubiquitination; GO:0031146,SCF-dependent proteasomal ubiquitin-dependent protein catabolic process; GO:0003674,molecular_function; GO:0005488,binding; GO:0042562,hormone binding; GO:0036094,small molec…
IFM89_030194	GO:0005789,endoplasmic reticulum membrane; GO:0016021,integral component of membrane; GO:0102985,delta12-fatty-acid desaturase activity; GO:0102987,palmitoleic acid delta 12 desaturase activity; GO:0006636,unsaturated fatty acid biosynthetic process; GO:0003674,molecular_function; GO:0003824,catalytic activity; GO:0016491,oxidoreductase activity; GO:0016705,oxidoreductase activity, acting on pair…
IFM89_035656	GO:0016021,integral component of membrane; GO:0005886,plasma membrane; GO:0005524,ATP binding; GO:0004672,protein kinase activity; GO:0046777,protein autophosphorylation; GO:0000166,nucleotide binding; GO:0003674,molecular_function; GO:0005488,binding; GO:0017076,purine nucleotide binding; GO:0030554,adenyl nucleotide binding; GO:0032553,ribonucleotide binding; GO:0032555,purine ribonucleotide bi…
IFM89_034510	GO:0005634,nucleus; GO:0003700,DNA-binding transcription factor activity; GO:0000981,DNA-binding transcription factor activity, RNA polymerase II-specific; GO:0042803,protein homodimerization activity; GO:0043565,sequence-specific DNA binding; GO:0010311,lateral root formation; GO:0045892,negative regulation of DNA-templated transcription; GO:0010017,red or far-red light signaling pathway; GO:000…
IFM89_011384	GO:0005783,endoplasmic reticulum; GO:0005789,endoplasmic reticulum membrane; GO:0016021,integral component of membrane; GO:0046872,metal ion binding; GO:0061630,ubiquitin protein ligase activity; GO:0044390,ubiquitin-like protein conjugating enzyme binding; GO:0004842,ubiquitin-protein transferase activity; GO:0071456,cellular response to hypoxia; GO:0071712,ER-associated misfolded protein catabo…
IFM89_031810	GO:0005794,Golgi apparatus; GO:0000139,Golgi membrane; GO:0016021,integral component of membrane; GO:0003831,beta-N-acetylglucosaminylglycopeptide beta-1,4-galactosyltransferase activity; GO:0042546,cell wall biogenesis; GO:0071555,cell wall organization; GO:0045489,pectin biosynthetic process; GO:0003674,molecular_function; GO:0003824,catalytic activity; GO:0008194,UDP-glycosyltransferase activi…
IFM89_020489	GO:0005634,nucleus; GO:0003700,DNA-binding transcription factor activity; GO:0008270,zinc ion binding; GO:0006355,regulation of DNA-templated transcription; GO:0003674,molecular_function; GO:0140110,transcription regulator activity; GO:0005488,binding; GO:0043167,ion binding; GO:0043169,cation binding; GO:0046872,metal ion binding; GO:0046914,transition metal ion binding; GO:0006139,nucleobase-co…
IFM89_002045	GO:0016491,oxidoreductase activity; GO:0003674,molecular_function; GO:0003824,catalytic activity
IFM89_002260	GO:0009507,chloroplast; GO:0005887,integral component of plasma membrane; GO:0015301,NA; GO:0008271,secondary active sulfate transmembrane transporter activity; GO:0015116,sulfate transmembrane transporter activity; GO:0015293,symporter activity; GO:0008272,sulfate transport; GO:0003674,molecular_function; GO:0005215,transporter activity; GO:0008509,anion transmembrane transporter activity; GO:00…
IFM89_031724	GO:0009507,chloroplast; GO:0003866,3-phosphoshikimate 1-carboxyvinyltransferase activity; GO:0009073,aromatic amino acid family biosynthetic process; GO:0008652,cellular amino acid biosynthetic process; GO:0009423,chorismate biosynthetic process; GO:0007623,circadian rhythm; GO:0010597,green leaf volatile biosynthetic process; GO:0009635,response to herbicide; GO:0003674,molecular_function; GO:00…
IFM89_024239	GO:0005829,cytosol; GO:0005524,ATP binding; GO:0016405,CoA-ligase activity; GO:0000166,nucleotide binding; GO:0003674,molecular_function; GO:0005488,binding; GO:0017076,purine nucleotide binding; GO:0030554,adenyl nucleotide binding; GO:0032553,ribonucleotide binding; GO:0032555,purine ribonucleotide binding; GO:0032559,adenyl ribonucleotide binding; GO:0035639,purine ribonucleoside triphosphate …
IFM89_006425	GO:0005634,nucleus; GO:0003677,DNA binding; GO:0046872,metal ion binding; GO:0003729,mRNA binding; GO:0003723,RNA binding; GO:0003674,molecular_function; GO:0003676,nucleic acid binding; GO:0005488,binding; GO:0097159,organic cyclic compound binding; GO:1901363,heterocyclic compound binding; GO:0043167,ion binding; GO:0043169,cation binding; GO:0005575,cellular_component; GO:0005622,intracellular…
IFM89_020842	GO:0003825,alpha,alpha-trehalose-phosphate synthase (UDP-forming) activity; GO:0004805,trehalose-phosphatase activity; GO:0005992,trehalose biosynthetic process; GO:0070413,trehalose metabolism in response to stress; GO:0003674,molecular_function; GO:0003824,catalytic activity; GO:0008194,UDP-glycosyltransferase activity; GO:0016740,transferase activity; GO:0016757,glycosyltransferase activity; G…
IFM89_007513	GO:0048046,apoplast; GO:0005737,cytoplasm; GO:0005829,cytosol; GO:0009506,plasmodesma; GO:0005096,GTPase activator activity; GO:0005093,Rab GDP-dissociation inhibitor activity; GO:0015031,protein transport; GO:0007264,small GTPase mediated signal transduction; GO:0016192,vesicle-mediated transport; GO:0003674,molecular_function; GO:0008047,enzyme activator activity; GO:0030234,enzyme regulator ac…
IFM89_027593	GO:0009535,chloroplast thylakoid membrane; GO:0005507,copper ion binding; GO:0009055,electron transfer activity; GO:0003674,molecular_function; GO:0005488,binding; GO:0043167,ion binding; GO:0043169,cation binding; GO:0046872,metal ion binding; GO:0046914,transition metal ion binding; GO:0003824,catalytic activity; GO:0016491,oxidoreductase activity; GO:0005575,cellular_component; GO:0005622,intr…
IFM89_032689	GO:0005634,nucleus; GO:0061630,ubiquitin protein ligase activity; GO:0008270,zinc ion binding; GO:0016567,protein ubiquitination; GO:0006511,ubiquitin-dependent protein catabolic process; GO:0003674,molecular_function; GO:0003824,catalytic activity; GO:0004842,ubiquitin-protein transferase activity; GO:0016740,transferase activity; GO:0019787,ubiquitin-like protein transferase activity; GO:006165…
IFM89_038224	GO:0005634,nucleus; GO:0003677,DNA binding; GO:0003700,DNA-binding transcription factor activity; GO:0046872,metal ion binding; GO:0006355,regulation of DNA-templated transcription; GO:0003674,molecular_function; GO:0003676,nucleic acid binding; GO:0005488,binding; GO:0097159,organic cyclic compound binding; GO:1901363,heterocyclic compound binding; GO:0140110,transcription regulator activity; GO…
IFM89_016084	GO:0005775,vacuolar lumen; GO:0033793,aureusidin synthase activity; GO:0102706,butein:oxygen oxidoreductase activity; GO:0004097,catechol oxidase activity; GO:0005507,copper ion binding; GO:0102791,sulfuretin synthase activity; GO:0046148,pigment biosynthetic process; GO:0003674,molecular_function; GO:0003824,catalytic activity; GO:0016491,oxidoreductase activity; GO:0046992,oxidoreductase activi…
IFM89_025233	GO:0009535,chloroplast thylakoid membrane; GO:0016021,integral component of membrane; GO:0009522,photosystem I; GO:0009523,photosystem II; GO:0016168,chlorophyll binding; GO:0046872,metal ion binding; GO:0009768,photosynthesis, light harvesting in photosystem I; GO:0009416,response to light stimulus; GO:0003674,molecular_function; GO:0005488,binding; GO:0046906,tetrapyrrole binding; GO:0097159,or…
IFM89_005157	GO:0003677,DNA binding; GO:0008270,zinc ion binding; GO:0003674,molecular_function; GO:0003676,nucleic acid binding; GO:0005488,binding; GO:0097159,organic cyclic compound binding; GO:1901363,heterocyclic compound binding; GO:0043167,ion binding; GO:0043169,cation binding; GO:0046872,metal ion binding; GO:0046914,transition metal ion binding
IFM89_037843	GO:0005634,nucleus; GO:0003677,DNA binding; GO:0003700,DNA-binding transcription factor activity; GO:0043565,sequence-specific DNA binding; GO:0042631,cellular response to water deprivation; GO:0030308,negative regulation of cell growth; GO:0032876,negative regulation of DNA endoreduplication; GO:0045892,negative regulation of DNA-templated transcription; GO:0008361,regulation of cell size; GO:20…
IFM89_026273	GO:0005576,extracellular region; GO:0006952,defense response; GO:0006950,response to stress; GO:0008150,biological_process; GO:0050896,response to stimulus; GO:0005575,cellular_component; GO:0110165,cellular anatomical entity
IFM89_002181	GO:0005524,ATP binding; GO:0016301,kinase activity; GO:0046872,metal ion binding; GO:0106310,protein serine kinase activity; GO:0004674,protein serine/threonine kinase activity; GO:0035556,intracellular signal transduction; GO:0018105,peptidyl-serine phosphorylation; GO:0040008,regulation of growth; GO:0009826,unidimensional cell growth; GO:0000166,nucleotide binding; GO:0003674,molecular_functio…
IFM89_035122	GO:0005737,cytoplasm; GO:0047216,inositol 3-alpha-galactosyltransferase activity; GO:0046872,metal ion binding; GO:0052576,carbohydrate storage; GO:0070417,cellular response to cold; GO:0006012,galactose metabolic process; GO:0010325,raffinose family oligosaccharide biosynthetic process; GO:0003674,molecular_function; GO:0003824,catalytic activity; GO:0008194,UDP-glycosyltransferase activity; GO:…
IFM89_029119	GO:0016021,integral component of membrane; GO:0000325,plant-type vacuole; GO:0009705,plant-type vacuole membrane; GO:0005886,plasma membrane; GO:0022857,transmembrane transporter activity; GO:0009851,auxin biosynthetic process; GO:0010315,auxin export across the plasma membrane; GO:0009734,auxin-activated signaling pathway; GO:0071555,cell wall organization; GO:0006952,defense response; GO:000983…
IFM89_006661	GO:0030784,3'-hydroxy-N-methyl-(S)-coclaurine 4'-O-methyltransferase activity; GO:0008171,O-methyltransferase activity; GO:0046983,protein dimerization activity; GO:0032259,methylation; GO:0003674,molecular_function; GO:0003824,catalytic activity; GO:0008168,methyltransferase activity; GO:0008757,S-adenosylmethionine-dependent methyltransferase activity; GO:0016740,transferase activity; GO:001674…
IFM89_036288	GO:0005794,Golgi apparatus; GO:0016021,integral component of membrane; GO:0005886,plasma membrane; GO:0022857,transmembrane transporter activity; GO:0003674,molecular_function; GO:0005215,transporter activity; GO:0005575,cellular_component; GO:0005622,intracellular anatomical structure; GO:0005737,cytoplasm; GO:0012505,endomembrane system; GO:0043226,organelle; GO:0043227,membrane-bounded organel…
IFM89_034484	GO:0009507,chloroplast; GO:0033730,arogenate dehydrogenase (NADP+) activity; GO:0008977,prephenate dehydrogenase (NAD+) activity; GO:0004665,prephenate dehydrogenase (NADP+) activity; GO:0006571,tyrosine biosynthetic process; GO:0003674,molecular_function; GO:0003824,catalytic activity; GO:0016491,oxidoreductase activity; GO:0016627,oxidoreductase activity, acting on the CH-CH group of donors; GO…
IFM89_033096	GO:0016021,integral component of membrane; GO:0140359,ABC-type transporter activity; GO:0005524,ATP binding; GO:0003674,molecular_function; GO:0005215,transporter activity; GO:0015399,primary active transmembrane transporter activity; GO:0022804,active transmembrane transporter activity; GO:0022857,transmembrane transporter activity; GO:0042626,ATPase-coupled transmembrane transporter activity; G…
IFM89_009445	GO:0016787,hydrolase activity; GO:0003674,molecular_function; GO:0003824,catalytic activity
IFM89_015207	GO:0005783,endoplasmic reticulum; GO:0031305,integral component of mitochondrial inner membrane; GO:0005743,mitochondrial inner membrane; GO:0005741,mitochondrial outer membrane; GO:0005739,mitochondrion; GO:0005744,TIM23 mitochondrial import inner membrane translocase complex; GO:0030150,protein import into mitochondrial matrix; GO:0045039,protein insertion into mitochondrial inner membrane; GO:…
IFM89_020028	GO:0030136,clathrin-coated vesicle; GO:0005829,cytosol; GO:0005575,cellular_component; GO:0005622,intracellular anatomical structure; GO:0005737,cytoplasm; GO:0030135,coated vesicle; GO:0031410,cytoplasmic vesicle; GO:0031982,vesicle; GO:0043226,organelle; GO:0043227,membrane-bounded organelle; GO:0043229,intracellular organelle; GO:0043231,intracellular membrane-bounded organelle; GO:0097708,int…
IFM89_024357	GO:0009507,chloroplast; GO:0009941,chloroplast envelope; GO:0016021,integral component of membrane; GO:0005739,mitochondrion; GO:0140359,ABC-type transporter activity; GO:0005524,ATP binding; GO:0003674,molecular_function; GO:0005215,transporter activity; GO:0015399,primary active transmembrane transporter activity; GO:0022804,active transmembrane transporter activity; GO:0022857,transmembrane tr…
IFM89_012587	GO:0005634,nucleus; GO:0003746,translation elongation factor activity; GO:0003674,molecular_function; GO:0003676,nucleic acid binding; GO:0005488,binding; GO:0008135,translation factor activity, RNA binding; GO:0045182,translation regulator activity; GO:0090079,translation regulator activity, nucleic acid binding; GO:0097159,organic cyclic compound binding; GO:1901363,heterocyclic compound bindin…
IFM89_013313	GO:0005737,cytoplasm; GO:0005874,microtubule; GO:0005525,GTP binding; GO:0005200,structural constituent of cytoskeleton; GO:0000226,microtubule cytoskeleton organization; GO:0007017,microtubule-based process; GO:0000278,mitotic cell cycle; GO:0000166,nucleotide binding; GO:0003674,molecular_function; GO:0005488,binding; GO:0017076,purine nucleotide binding; GO:0019001,guanyl nucleotide binding; G…
IFM89_008086	GO:0048046,apoplast; GO:0008422,beta-glucosidase activity; GO:0102483,scopolin beta-glucosidase activity; GO:0005975,carbohydrate metabolic process; GO:0003674,molecular_function; GO:0003824,catalytic activity; GO:0004553,hydrolase activity, hydrolyzing O-glycosyl compounds; GO:0015926,glucosidase activity; GO:0016787,hydrolase activity; GO:0016798,hydrolase activity, acting on glycosyl bonds; GO…
novel.8162	GO:0016021,integral component of membrane; GO:0005886,plasma membrane; GO:0022857,transmembrane transporter activity; GO:0003674,molecular_function; GO:0005215,transporter activity; GO:0005575,cellular_component; GO:0016020,membrane; GO:0031224,intrinsic component of membrane; GO:0110165,cellular anatomical entity; GO:0071944,cell periphery
IFM89_001583	GO:0009507,chloroplast; GO:0005634,nucleus; GO:0061077,chaperone-mediated protein folding; GO:1902395,regulation of 1-deoxy-D-xylulose-5-phosphate synthase activity; GO:0010322,regulation of isopentenyl diphosphate biosynthetic process, methylerythritol 4-phosphate pathway; GO:0006457,protein folding; GO:0008150,biological_process; GO:0009987,cellular process; GO:0050790,regulation of catalytic a…
IFM89_011302	GO:0016846,carbon-sulfur lyase activity; GO:0046872,metal ion binding; GO:0003674,molecular_function; GO:0003824,catalytic activity; GO:0016829,lyase activity; GO:0005488,binding; GO:0043167,ion binding; GO:0043169,cation binding
IFM89_013275	GO:0005829,cytosol; GO:0005516,calmodulin binding; GO:0004351,glutamate decarboxylase activity; GO:0030170,pyridoxal phosphate binding; GO:0006538,glutamate catabolic process; GO:0003674,molecular_function; GO:0005488,binding; GO:0005515,protein binding; GO:0003824,catalytic activity; GO:0016829,lyase activity; GO:0016830,carbon-carbon lyase activity; GO:0016831,carboxy-lyase activity; GO:0019842…
novel.2436	GO:0009507,chloroplast; GO:0009941,chloroplast envelope; GO:0009570,chloroplast stroma; GO:0005576,extracellular region; GO:0005840,ribosome; GO:0003729,mRNA binding; GO:0019843,rRNA binding; GO:0003735,structural constituent of ribosome; GO:0009793,embryo development ending in seed dormancy; GO:0006412,translation; GO:0003674,molecular_function; GO:0003676,nucleic acid binding; GO:0003723,RNA bi…
IFM89_009669	GO:0005634,nucleus; GO:0001228,DNA-binding transcription activator activity, RNA polymerase II-specific; GO:0003700,DNA-binding transcription factor activity; GO:0046982,protein heterodimerization activity; GO:0000976,transcription cis-regulatory region binding; GO:0003712,transcription coregulator activity; GO:0009738,abscisic acid-activated signaling pathway; GO:0009740,gibberellic acid mediate…
IFM89_006980	GO:0005886,plasma membrane; GO:0051537,2 iron, 2 sulfur cluster binding; GO:0071949,FAD binding; GO:0005506,iron ion binding; GO:0016491,oxidoreductase activity; GO:0004854,xanthine dehydrogenase activity; GO:0006145,purine nucleobase catabolic process; GO:0000302,response to reactive oxygen species; GO:0009414,response to water deprivation; GO:0042554,superoxide anion generation; GO:0046110,xant…
IFM89_026324	GO:0016021,integral component of membrane; GO:0005886,plasma membrane; GO:2001007,negative regulation of cellulose biosynthetic process; GO:0000271,polysaccharide biosynthetic process; GO:0005975,carbohydrate metabolic process; GO:0005976,polysaccharide metabolic process; GO:0006073,cellular glucan metabolic process; GO:0006109,regulation of carbohydrate metabolic process; GO:0008150,biological_p…
IFM89_032428	GO:0005829,cytosol; GO:0043186,P granule; GO:0005524,ATP binding; GO:0016887,ATP hydrolysis activity; GO:0003723,RNA binding; GO:0003724,RNA helicase activity; GO:0035194,post-transcriptional gene silencing by RNA; GO:0009616,RNAi-mediated antiviral immune response; GO:0000166,nucleotide binding; GO:0003674,molecular_function; GO:0005488,binding; GO:0017076,purine nucleotide binding; GO:0030554,a…
IFM89_027696	GO:0016021,integral component of membrane; GO:0020037,heme binding; GO:0005506,iron ion binding; GO:0004497,monooxygenase activity; GO:0016705,oxidoreductase activity, acting on paired donors, with incorporation or reduction of molecular oxygen; GO:0003674,molecular_function; GO:0005488,binding; GO:0046906,tetrapyrrole binding; GO:0097159,organic cyclic compound binding; GO:1901363,heterocyclic c…
IFM89_012148	GO:0005576,extracellular region; GO:0045330,aspartyl esterase activity; GO:0030599,pectinesterase activity; GO:0046910,pectinesterase inhibitor activity; GO:0042545,cell wall modification; GO:0009835,fruit ripening; GO:0045490,pectin catabolic process; GO:0003674,molecular_function; GO:0003824,catalytic activity; GO:0016787,hydrolase activity; GO:0016788,hydrolase activity, acting on ester bonds;…
IFM89_003386	GO:0008194,UDP-glycosyltransferase activity; GO:0003674,molecular_function; GO:0003824,catalytic activity; GO:0016740,transferase activity; GO:0016757,glycosyltransferase activity
novel.2381	GO:0005634,nucleus; GO:0003677,DNA binding; GO:0000981,DNA-binding transcription factor activity, RNA polymerase II-specific; GO:0008289,lipid binding; GO:0003674,molecular_function; GO:0003676,nucleic acid binding; GO:0005488,binding; GO:0097159,organic cyclic compound binding; GO:1901363,heterocyclic compound binding; GO:0003700,DNA-binding transcription factor activity; GO:0140110,transcriptio…
IFM89_004945	GO:0005794,Golgi apparatus; GO:0000325,plant-type vacuole; GO:0005886,plasma membrane; GO:0009506,plasmodesma; GO:0009536,plastid; GO:0043424,protein histidine kinase binding; GO:0003674,molecular_function; GO:0005488,binding; GO:0005515,protein binding; GO:0019899,enzyme binding; GO:0019900,kinase binding; GO:0019901,protein kinase binding; GO:0005575,cellular_component; GO:0005622,intracellular…
IFM89_028656	GO:0048046,apoplast; GO:0004553,hydrolase activity, hydrolyzing O-glycosyl compounds; GO:0016762,xyloglucan:xyloglucosyl transferase activity; GO:0042546,cell wall biogenesis; GO:0071555,cell wall organization; GO:0009835,fruit ripening; GO:0010411,xyloglucan metabolic process; GO:0003674,molecular_function; GO:0003824,catalytic activity; GO:0016787,hydrolase activity; GO:0016798,hydrolase activi…
IFM89_021490	GO:0005829,cytosol; GO:0019005,SCF ubiquitin ligase complex; GO:0080037,negative regulation of cytokinin-activated signaling pathway; GO:2000762,regulation of phenylpropanoid metabolic process; GO:0007154,cell communication; GO:0007165,signal transduction; GO:0008150,biological_process; GO:0009719,response to endogenous stimulus; GO:0009725,response to hormone; GO:0009735,response to cytokinin; G…
IFM89_000343	GO:0016021,integral component of membrane; GO:0030133,transport vesicle; GO:0017022,myosin binding; GO:0080115,myosin XI tail binding; GO:0003674,molecular_function; GO:0005488,binding; GO:0005515,protein binding; GO:0008092,cytoskeletal protein binding; GO:0032029,myosin tail binding; GO:0032036,myosin heavy chain binding; GO:0005575,cellular_component; GO:0016020,membrane; GO:0031224,intrinsic …
IFM89_001539	GO:0005737,cytoplasm; GO:0005769,early endosome; GO:0031901,early endosome membrane; GO:0005771,multivesicular body; GO:0035091,phosphatidylinositol binding; GO:0043130,ubiquitin binding; GO:0043328,protein transport to vacuole involved in ubiquitin-dependent protein catabolic process via the multivesicular body sorting pathway; GO:0003674,molecular_function; GO:0005488,binding; GO:0005543,phosph…
IFM89_039663	GO:0016021,integral component of membrane; GO:0005886,plasma membrane; GO:0005524,ATP binding; GO:0004714,transmembrane receptor protein tyrosine kinase activity; GO:0006468,protein phosphorylation; GO:0000166,nucleotide binding; GO:0003674,molecular_function; GO:0005488,binding; GO:0017076,purine nucleotide binding; GO:0030554,adenyl nucleotide binding; GO:0032553,ribonucleotide binding; GO:0032…
IFM89_003576	GO:0005634,nucleus; GO:0003677,DNA binding; GO:0009299,mRNA transcription; GO:0090698,post-embryonic plant morphogenesis; GO:0009416,response to light stimulus; GO:0003674,molecular_function; GO:0003676,nucleic acid binding; GO:0005488,binding; GO:0097159,organic cyclic compound binding; GO:1901363,heterocyclic compound binding; GO:0006139,nucleobase-containing compound metabolic process; GO:0006…
IFM89_026374	GO:0016021,integral component of membrane; GO:0061630,ubiquitin protein ligase activity; GO:0008270,zinc ion binding; GO:0009742,brassinosteroid mediated signaling pathway; GO:0016567,protein ubiquitination; GO:1901371,regulation of leaf morphogenesis; GO:1905421,regulation of plant organ morphogenesis; GO:0009741,response to brassinosteroid; GO:0010200,response to chitin; GO:0003674,molecular_fu…
IFM89_037587	GO:0016020,membrane; GO:0012511,monolayer-surrounded lipid storage body; GO:0005777,peroxisome; GO:0004806,triglyceride lipase activity; GO:0006071,glycerol metabolic process; GO:0019433,triglyceride catabolic process; GO:0006641,triglyceride metabolic process; GO:0003674,molecular_function; GO:0003824,catalytic activity; GO:0016298,lipase activity; GO:0016787,hydrolase activity; GO:0016788,hydro…
IFM89_013778	GO:0046872,metal ion binding; GO:0071456,cellular response to hypoxia; GO:0009749,response to glucose; GO:0042594,response to starvation; GO:0009744,response to sucrose; GO:0003674,molecular_function; GO:0005488,binding; GO:0043167,ion binding; GO:0043169,cation binding; GO:0001666,response to hypoxia; GO:0006950,response to stress; GO:0008150,biological_process; GO:0009628,response to abiotic st…
IFM89_032926	GO:0016021,integral component of membrane; GO:0005811,lipid droplet; GO:0070523,11-beta-hydroxysteroid dehydrogenase (NAD+) activity; GO:0070524,11-beta-hydroxysteroid dehydrogenase (NADP+) activity; GO:0044594,17-beta-hydroxysteroid dehydrogenase (NAD+) activity; GO:0003674,molecular_function; GO:0003824,catalytic activity; GO:0003845,11-beta-hydroxysteroid dehydrogenase [NAD(P)] activity; GO:00…
IFM89_037861	GO:0016021,integral component of membrane; GO:0046872,metal ion binding; GO:0016740,transferase activity; GO:0016567,protein ubiquitination; GO:0003674,molecular_function; GO:0005488,binding; GO:0043167,ion binding; GO:0043169,cation binding; GO:0003824,catalytic activity; GO:0006807,nitrogen compound metabolic process; GO:0008150,biological_process; GO:0008152,metabolic process; GO:0019538,prote…
IFM89_005217	GO:0016021,integral component of membrane; GO:0020037,heme binding; GO:0005506,iron ion binding; GO:0004497,monooxygenase activity; GO:0016705,oxidoreductase activity, acting on paired donors, with incorporation or reduction of molecular oxygen; GO:0019438,aromatic compound biosynthetic process; GO:0009699,phenylpropanoid biosynthetic process; GO:0003674,molecular_function; GO:0005488,binding; GO…
IFM89_018855	GO:0005524,ATP binding; GO:0004693,cyclin-dependent protein serine/threonine kinase activity; GO:0106310,protein serine kinase activity; GO:0008353,RNA polymerase II CTD heptapeptide repeat kinase activity; GO:0006468,protein phosphorylation; GO:0000166,nucleotide binding; GO:0003674,molecular_function; GO:0005488,binding; GO:0017076,purine nucleotide binding; GO:0030554,adenyl nucleotide binding…
IFM89_032113	GO:0016021,integral component of membrane; GO:0020037,heme binding; GO:0005506,iron ion binding; GO:0047084,methyltetrahydroprotoberberine 14-monooxygenase activity; GO:0033075,isoquinoline alkaloid biosynthetic process; GO:0003674,molecular_function; GO:0005488,binding; GO:0046906,tetrapyrrole binding; GO:0097159,organic cyclic compound binding; GO:1901363,heterocyclic compound binding; GO:00431…
IFM89_011801	GO:0005634,nucleus; GO:0003723,RNA binding; GO:0009734,auxin-activated signaling pathway; GO:0044843,cell cycle G1/S phase transition; GO:0051302,regulation of cell division; GO:0001558,regulation of cell growth; GO:0006364,rRNA processing; GO:0003674,molecular_function; GO:0003676,nucleic acid binding; GO:0005488,binding; GO:0097159,organic cyclic compound binding; GO:1901363,heterocyclic compou…
IFM89_002703	GO:0008024,cyclin/CDK positive transcription elongation factor complex; GO:0005634,nucleus; GO:0061575,cyclin-dependent protein serine/threonine kinase activator activity; GO:0016538,cyclin-dependent protein serine/threonine kinase regulator activity; GO:0007049,cell cycle; GO:0051301,cell division; GO:0032786,positive regulation of DNA-templated transcription, elongation; GO:0006357,regulation o…
IFM89_008416	GO:0005768,endosome; GO:0005794,Golgi apparatus; GO:0000139,Golgi membrane; GO:0000138,Golgi trans cisterna; GO:0016021,integral component of membrane; GO:0005802,trans-Golgi network; GO:0016757,glycosyltransferase activity; GO:0071555,cell wall organization; GO:0045489,pectin biosynthetic process; GO:0006486,protein glycosylation; GO:0003674,molecular_function; GO:0003824,catalytic activity; GO:…
IFM89_012987	GO:0005829,cytosol; GO:0005634,nucleus; GO:0000976,transcription cis-regulatory region binding; GO:0010597,green leaf volatile biosynthetic process; GO:0001067,transcription regulatory region nucleic acid binding; GO:0003674,molecular_function; GO:0003676,nucleic acid binding; GO:0003677,DNA binding; GO:0003690,double-stranded DNA binding; GO:0005488,binding; GO:0043565,sequence-specific DNA bind…
IFM89_013502	GO:0005737,cytoplasm; GO:0003871,5-methyltetrahydropteroyltriglutamate-homocysteine S-methyltransferase activity; GO:0008270,zinc ion binding; GO:0009086,methionine biosynthetic process; GO:0032259,methylation; GO:0003674,molecular_function; GO:0003824,catalytic activity; GO:0008168,methyltransferase activity; GO:0008172,S-methyltransferase activity; GO:0016740,transferase activity; GO:0016741,tr…
IFM89_035125	GO:0005737,cytoplasm; GO:0005829,cytosol; GO:0005759,mitochondrial matrix; GO:0005739,mitochondrion; GO:0051537,2 iron, 2 sulfur cluster binding; GO:0008198,ferrous iron binding; GO:0005198,structural molecule activity; GO:0006879,cellular iron ion homeostasis; GO:0016226,iron-sulfur cluster assembly; GO:0003674,molecular_function; GO:0005488,binding; GO:0051536,iron-sulfur cluster binding; GO:00…
IFM89_012090	GO:0005737,cytoplasm; GO:0043424,protein histidine kinase binding; GO:1905037,autophagosome organization; GO:0045087,innate immune response; GO:0003674,molecular_function; GO:0005488,binding; GO:0005515,protein binding; GO:0019899,enzyme binding; GO:0019900,kinase binding; GO:0019901,protein kinase binding; GO:0006914,autophagy; GO:0006996,organelle organization; GO:0007033,vacuole organization; …
IFM89_003729	GO:0048046,apoplast; GO:0005615,extracellular space; GO:0005794,Golgi apparatus; GO:0009505,plant-type cell wall; GO:0009506,plasmodesma; GO:0009536,plastid; GO:0071456,cellular response to hypoxia; GO:0001666,response to hypoxia; GO:0006950,response to stress; GO:0008150,biological_process; GO:0009628,response to abiotic stimulus; GO:0009987,cellular process; GO:0033554,cellular response to stre…
IFM89_035055	GO:0005634,nucleus; GO:0019005,SCF ubiquitin ligase complex; GO:0010011,auxin binding; GO:0000822,inositol hexakisphosphate binding; GO:0009734,auxin-activated signaling pathway; GO:0016567,protein ubiquitination; GO:0031146,SCF-dependent proteasomal ubiquitin-dependent protein catabolic process; GO:0003674,molecular_function; GO:0005488,binding; GO:0042562,hormone binding; GO:0036094,small molec…
novel.1088	GO:0016021,integral component of membrane; GO:0005575,cellular_component; GO:0016020,membrane; GO:0031224,intrinsic component of membrane; GO:0110165,cellular anatomical entity
IFM89_037705	GO:0016021,integral component of membrane; GO:0009705,plant-type vacuole membrane; GO:0071916,dipeptide transmembrane transporter activity; GO:0080054,low-affinity nitrate transmembrane transporter activity; GO:0042937,tripeptide transmembrane transporter activity; GO:0015706,nitrate transmembrane transport; GO:0003674,molecular_function; GO:0005215,transporter activity; GO:0022857,transmembrane …
IFM89_001660	GO:0005654,nucleoplasm; GO:0005634,nucleus; GO:0005667,transcription regulator complex; GO:0003677,DNA binding; GO:0046982,protein heterodimerization activity; GO:0003714,transcription corepressor activity; GO:0030154,cell differentiation; GO:0006974,cellular response to DNA damage stimulus; GO:0071217,cellular response to external biotic stimulus; GO:0009793,embryo development ending in seed dor…
IFM89_032856	GO:0005789,endoplasmic reticulum membrane; GO:0016021,integral component of membrane; GO:0102963,(S)-corytuberine synthase activity; GO:0020037,heme binding; GO:0005506,iron ion binding; GO:0004497,monooxygenase activity; GO:0009820,alkaloid metabolic process; GO:0019438,aromatic compound biosynthetic process; GO:1901362,organic cyclic compound biosynthetic process; GO:0003674,molecular_function;…
IFM89_033338	GO:0000786,nucleosome; GO:0005634,nucleus; GO:0003677,DNA binding; GO:0046982,protein heterodimerization activity; GO:0030527,structural constituent of chromatin; GO:0006334,nucleosome assembly; GO:0003674,molecular_function; GO:0003676,nucleic acid binding; GO:0005488,binding; GO:0097159,organic cyclic compound binding; GO:1901363,heterocyclic compound binding; GO:0005515,protein binding; GO:004…
IFM89_019834	GO:0016021,integral component of membrane; GO:0005739,mitochondrion; GO:0005886,plasma membrane; GO:0005524,ATP binding; GO:0042277,peptide binding; GO:0106310,protein serine kinase activity; GO:0004674,protein serine/threonine kinase activity; GO:0033612,receptor serine/threonine kinase binding; GO:0005102,signaling receptor binding; GO:0019199,transmembrane receptor protein kinase activity; GO:…
novel.7061	GO:0016021,integral component of membrane; GO:0005886,plasma membrane; GO:0005524,ATP binding; GO:0106310,protein serine kinase activity; GO:0004674,protein serine/threonine kinase activity; GO:0046777,protein autophosphorylation; GO:0000166,nucleotide binding; GO:0003674,molecular_function; GO:0005488,binding; GO:0017076,purine nucleotide binding; GO:0030554,adenyl nucleotide binding; GO:0032553…
IFM89_022334	GO:0005634,nucleus; GO:0003700,DNA-binding transcription factor activity; GO:0043565,sequence-specific DNA binding; GO:0000976,transcription cis-regulatory region binding; GO:0006355,regulation of DNA-templated transcription; GO:0003674,molecular_function; GO:0140110,transcription regulator activity; GO:0003676,nucleic acid binding; GO:0003677,DNA binding; GO:0005488,binding; GO:0097159,organic c…
IFM89_022594	GO:0009507,chloroplast; GO:0009570,chloroplast stroma; GO:0004084,branched-chain-amino-acid transaminase activity; GO:0052656,L-isoleucine transaminase activity; GO:0052654,L-leucine transaminase activity; GO:0050048,L-leucine:2-oxoglutarate aminotransferase activity; GO:0052655,L-valine transaminase activity; GO:0009097,isoleucine biosynthetic process; GO:0009098,leucine biosynthetic process; GO…
IFM89_018667	GO:0016021,integral component of membrane; GO:0008250,oligosaccharyltransferase complex; GO:0006487,protein N-linked glycosylation; GO:0009409,response to cold; GO:0006486,protein glycosylation; GO:0006807,nitrogen compound metabolic process; GO:0008150,biological_process; GO:0008152,metabolic process; GO:0009058,biosynthetic process; GO:0009059,macromolecule biosynthetic process; GO:0009100,glyc…
IFM89_016955	GO:0005737,cytoplasm; GO:0051537,2 iron, 2 sulfur cluster binding; GO:0097573,glutathione oxidoreductase activity; GO:0046872,metal ion binding; GO:0000122,negative regulation of transcription by RNA polymerase II; GO:0003674,molecular_function; GO:0005488,binding; GO:0051536,iron-sulfur cluster binding; GO:0051540,metal cluster binding; GO:0003824,catalytic activity; GO:0015035,protein-disulfide…
IFM89_007493	GO:0005737,cytoplasm; GO:0005730,nucleolus; GO:0005634,nucleus; GO:0008270,zinc ion binding; GO:0009910,negative regulation of flower development; GO:0003674,molecular_function; GO:0005488,binding; GO:0043167,ion binding; GO:0043169,cation binding; GO:0046872,metal ion binding; GO:0046914,transition metal ion binding; GO:0000003,reproduction; GO:0003006,developmental process involved in reproduct…
novel.4019	GO:0005634,nucleus; GO:0008483,transaminase activity; GO:0010073,meristem maintenance; GO:0010082,regulation of root meristem growth; GO:0003674,molecular_function; GO:0003824,catalytic activity; GO:0016740,transferase activity; GO:0016769,transferase activity, transferring nitrogenous groups; GO:0008150,biological_process; GO:0009888,tissue development; GO:0032501,multicellular organismal proces…
IFM89_013505	GO:0005737,cytoplasm; GO:0003871,5-methyltetrahydropteroyltriglutamate-homocysteine S-methyltransferase activity; GO:0008270,zinc ion binding; GO:0009086,methionine biosynthetic process; GO:0032259,methylation; GO:0003674,molecular_function; GO:0003824,catalytic activity; GO:0008168,methyltransferase activity; GO:0008172,S-methyltransferase activity; GO:0016740,transferase activity; GO:0016741,tr…
IFM89_012607	GO:0016021,integral component of membrane; GO:0020037,heme binding; GO:0005506,iron ion binding; GO:0047084,methyltetrahydroprotoberberine 14-monooxygenase activity; GO:0033075,isoquinoline alkaloid biosynthetic process; GO:0003674,molecular_function; GO:0005488,binding; GO:0046906,tetrapyrrole binding; GO:0097159,organic cyclic compound binding; GO:1901363,heterocyclic compound binding; GO:00431…
novel.505	GO:0005737,cytoplasm; GO:0051082,unfolded protein binding; GO:0006457,protein folding; GO:0003674,molecular_function; GO:0005488,binding; GO:0005515,protein binding; GO:0008150,biological_process; GO:0009987,cellular process; GO:0005575,cellular_component; GO:0005622,intracellular anatomical structure; GO:0110165,cellular anatomical entity
IFM89_009078	GO:0005634,nucleus; GO:0003700,DNA-binding transcription factor activity; GO:0000976,transcription cis-regulatory region binding; GO:0050832,defense response to fungus; GO:0009873,ethylene-activated signaling pathway; GO:0003674,molecular_function; GO:0140110,transcription regulator activity; GO:0001067,transcription regulatory region nucleic acid binding; GO:0003676,nucleic acid binding; GO:0003…
IFM89_000261	GO:0016021,integral component of membrane; GO:0005575,cellular_component; GO:0016020,membrane; GO:0031224,intrinsic component of membrane; GO:0110165,cellular anatomical entity
IFM89_003009	GO:0022626,cytosolic ribosome; GO:0005576,extracellular region; GO:0009505,plant-type cell wall; GO:0080081,4-methylumbelliferyl-beta-D-glucopyranoside beta-glucosidase activity; GO:0047668,amygdalin beta-glucosidase activity; GO:0080083,beta-gentiobiose beta-glucosidase activity; GO:0008422,beta-glucosidase activity; GO:0004567,beta-mannosidase activity; GO:0080079,cellobiose glucosidase activit…
IFM89_039506	GO:0005737,cytoplasm; GO:0005730,nucleolus; GO:0005634,nucleus; GO:0005665,RNA polymerase II, core complex; GO:0000418,RNA polymerase IV complex; GO:0000419,RNA polymerase V complex; GO:0003677,DNA binding; GO:0003899,DNA-directed 5'-3' RNA polymerase activity; GO:0046983,protein dimerization activity; GO:0010374,stomatal complex development; GO:0010375,stomatal complex patterning; GO:0006351,DNA…
IFM89_005636	GO:0003723,RNA binding; GO:0003674,molecular_function; GO:0003676,nucleic acid binding; GO:0005488,binding; GO:0097159,organic cyclic compound binding; GO:1901363,heterocyclic compound binding
IFM89_001316	GO:0005829,cytosol; GO:0005778,peroxisomal membrane; GO:0009536,plastid; GO:0005052,peroxisome matrix targeting signal-1 binding; GO:0016560,protein import into peroxisome matrix, docking; GO:0006625,protein targeting to peroxisome; GO:0009733,response to auxin; GO:0000268,peroxisome targeting sequence binding; GO:0003674,molecular_function; GO:0005048,signal sequence binding; GO:0005488,binding;…
IFM89_021599	GO:0016021,integral component of membrane; GO:0005575,cellular_component; GO:0016020,membrane; GO:0031224,intrinsic component of membrane; GO:0110165,cellular anatomical entity
IFM89_033994	GO:0016021,integral component of membrane; GO:0005886,plasma membrane; GO:0015293,symporter activity; GO:0006865,amino acid transport; GO:0009734,auxin-activated signaling pathway; GO:0003674,molecular_function; GO:0005215,transporter activity; GO:0015291,secondary active transmembrane transporter activity; GO:0022804,active transmembrane transporter activity; GO:0022857,transmembrane transporter…
IFM89_034316	GO:0048046,apoplast; GO:0004857,enzyme inhibitor activity; GO:0046910,pectinesterase inhibitor activity; GO:0043086,negative regulation of catalytic activity; GO:0003674,molecular_function; GO:0030234,enzyme regulator activity; GO:0098772,molecular function regulator activity; GO:0008150,biological_process; GO:0044092,negative regulation of molecular function; GO:0050790,regulation of catalytic a…
IFM89_015809	GO:0005759,mitochondrial matrix; GO:0005739,mitochondrion; GO:0005634,nucleus; GO:0005507,copper ion binding; GO:0009055,electron transfer activity; GO:0050660,flavin adenine dinucleotide binding; GO:0033539,fatty acid beta-oxidation using acyl-CoA dehydrogenase; GO:0003674,molecular_function; GO:0005488,binding; GO:0043167,ion binding; GO:0043169,cation binding; GO:0046872,metal ion binding; GO:…
IFM89_032090	GO:0016021,integral component of membrane; GO:0005886,plasma membrane; GO:0009506,plasmodesma; GO:0015207,adenine transmembrane transporter activity; GO:0015208,guanine transmembrane transporter activity; GO:0015294,solute:cation symporter activity; GO:0015210,uracil transmembrane transporter activity; GO:0098702,adenine import across plasma membrane; GO:0098710,guanine import across plasma membr…
IFM89_017833	GO:0016021,integral component of membrane; GO:0016020,membrane; GO:0005634,nucleus; GO:0000325,plant-type vacuole; GO:0015297,antiporter activity; GO:0022857,transmembrane transporter activity; GO:0042910,xenobiotic transmembrane transporter activity; GO:1990961,xenobiotic detoxification by transmembrane export across the plasma membrane; GO:0003674,molecular_function; GO:0005215,transporter acti…
novel.8210	GO:0005634,nucleus; GO:0009505,plant-type cell wall; GO:0046872,metal ion binding; GO:0061630,ubiquitin protein ligase activity; GO:0009938,negative regulation of gibberellic acid mediated signaling pathway; GO:0016567,protein ubiquitination; GO:0009651,response to salt stress; GO:0006511,ubiquitin-dependent protein catabolic process; GO:0003674,molecular_function; GO:0005488,binding; GO:0043167,…
IFM89_025976	GO:0005829,cytosol; GO:0022625,cytosolic large ribosomal subunit; GO:0022626,cytosolic ribosome; GO:0003735,structural constituent of ribosome; GO:0022618,ribonucleoprotein complex assembly; GO:0006412,translation; GO:0003674,molecular_function; GO:0005198,structural molecule activity; GO:0008150,biological_process; GO:0009987,cellular process; GO:0016043,cellular component organization; GO:00226…
IFM89_031837	GO:0005737,cytoplasm; GO:0008964,phosphoenolpyruvate carboxylase activity; GO:0015977,carbon fixation; GO:0006099,tricarboxylic acid cycle; GO:0003674,molecular_function; GO:0003824,catalytic activity; GO:0004611,phosphoenolpyruvate carboxykinase activity; GO:0016829,lyase activity; GO:0016830,carbon-carbon lyase activity; GO:0016831,carboxy-lyase activity; GO:0008150,biological_process; GO:00081…
IFM89_038463	GO:0071949,FAD binding; GO:0050328,tetrahydroberberine oxidase activity; GO:0000166,nucleotide binding; GO:0003674,molecular_function; GO:0005488,binding; GO:0036094,small molecule binding; GO:0043167,ion binding; GO:0043168,anion binding; GO:0050660,flavin adenine dinucleotide binding; GO:0097159,organic cyclic compound binding; GO:1901265,nucleoside phosphate binding; GO:1901363,heterocyclic co…
IFM89_011834	GO:0003677,DNA binding; GO:0008270,zinc ion binding; GO:0003674,molecular_function; GO:0003676,nucleic acid binding; GO:0005488,binding; GO:0097159,organic cyclic compound binding; GO:1901363,heterocyclic compound binding; GO:0043167,ion binding; GO:0043169,cation binding; GO:0046872,metal ion binding; GO:0046914,transition metal ion binding
IFM89_004531	GO:0005615,extracellular space; GO:0006952,defense response; GO:0009607,response to biotic stimulus; GO:0006950,response to stress; GO:0008150,biological_process; GO:0050896,response to stimulus; GO:0005575,cellular_component; GO:0005576,extracellular region; GO:0110165,cellular anatomical entity
IFM89_036323	GO:0005777,peroxisome; GO:0106286,(E)-caffeate-CoA ligase activity; GO:0016207,4-coumarate-CoA ligase activity; GO:0018859,4-hydroxybenzoate-CoA ligase activity; GO:0005524,ATP binding; GO:0016405,CoA-ligase activity; GO:0006744,ubiquinone biosynthetic process; GO:0003674,molecular_function; GO:0003824,catalytic activity; GO:0016874,ligase activity; GO:0016877,ligase activity, forming carbon-sulf…
IFM89_023664	GO:0005737,cytoplasm; GO:0005829,cytosol; GO:0005886,plasma membrane; GO:0009506,plasmodesma; GO:0004372,glycine hydroxymethyltransferase activity; GO:0030170,pyridoxal phosphate binding; GO:1901149,salicylic acid binding; GO:0070905,serine binding; GO:0008270,zinc ion binding; GO:0007623,circadian rhythm; GO:0046655,folic acid metabolic process; GO:0019264,glycine biosynthetic process from serin…
IFM89_036508	GO:0016021,integral component of membrane; GO:0005516,calmodulin binding; GO:0006952,defense response; GO:0009607,response to biotic stimulus; GO:0003674,molecular_function; GO:0005488,binding; GO:0005515,protein binding; GO:0006950,response to stress; GO:0008150,biological_process; GO:0050896,response to stimulus; GO:0005575,cellular_component; GO:0016020,membrane; GO:0031224,intrinsic component…
IFM89_017821	GO:0009941,chloroplast envelope; GO:0031969,chloroplast membrane; GO:0009534,chloroplast thylakoid; GO:0005829,cytosol; GO:0016021,integral component of membrane; GO:0005524,ATP binding; GO:0016887,ATP hydrolysis activity; GO:0004176,ATP-dependent peptidase activity; GO:0004222,metalloendopeptidase activity; GO:0008270,zinc ion binding; GO:0006508,proteolysis; GO:0000166,nucleotide binding; GO:00…
IFM89_007681	GO:0004190,aspartic-type endopeptidase activity; GO:0003677,DNA binding; GO:0006508,proteolysis; GO:0003674,molecular_function; GO:0003824,catalytic activity; GO:0004175,endopeptidase activity; GO:0008233,peptidase activity; GO:0016787,hydrolase activity; GO:0070001,aspartic-type peptidase activity; GO:0140096,catalytic activity, acting on a protein; GO:0003676,nucleic acid binding; GO:0005488,bi…
IFM89_024126	GO:0020037,heme binding; GO:0046872,metal ion binding; GO:0019825,oxygen binding; GO:0006631,fatty acid metabolic process; GO:0019432,triglyceride biosynthetic process; GO:0003674,molecular_function; GO:0005488,binding; GO:0046906,tetrapyrrole binding; GO:0097159,organic cyclic compound binding; GO:1901363,heterocyclic compound binding; GO:0043167,ion binding; GO:0043169,cation binding; GO:003609…
IFM89_001167	GO:0005576,extracellular region; GO:0005575,cellular_component; GO:0110165,cellular anatomical entity
IFM89_008957	GO:0030127,COPII vesicle coat; GO:0005783,endoplasmic reticulum; GO:0005794,Golgi apparatus; GO:0005635,nuclear envelope; GO:0005643,nuclear pore; GO:0031080,nuclear pore outer ring; GO:0005730,nucleolus; GO:0005198,structural molecule activity; GO:0090114,COPII-coated vesicle budding; GO:0051028,mRNA transport; GO:0006606,protein import into nucleus; GO:0003674,molecular_function; GO:0006810,tra…
IFM89_000614	GO:0050474,(S)-norcoclaurine synthase activity; GO:0009820,alkaloid metabolic process; GO:0006952,defense response; GO:0003674,molecular_function; GO:0003824,catalytic activity; GO:0016829,lyase activity; GO:0016835,carbon-oxygen lyase activity; GO:0016836,hydro-lyase activity; GO:0006807,nitrogen compound metabolic process; GO:0008150,biological_process; GO:0008152,metabolic process; GO:0071704,…
IFM89_013572	GO:0016021,integral component of membrane; GO:0005575,cellular_component; GO:0016020,membrane; GO:0031224,intrinsic component of membrane; GO:0110165,cellular anatomical entity
IFM89_018471	GO:0016021,integral component of membrane; GO:0046872,metal ion binding; GO:0017018,myosin phosphatase activity; GO:0004722,protein serine/threonine phosphatase activity; GO:0035970,peptidyl-threonine dephosphorylation; GO:0003674,molecular_function; GO:0005488,binding; GO:0043167,ion binding; GO:0043169,cation binding; GO:0003824,catalytic activity; GO:0004721,phosphoprotein phosphatase activity…
IFM89_038092	GO:0005576,extracellular region; GO:0052793,pectin acetylesterase activity; GO:0071555,cell wall organization; GO:0003674,molecular_function; GO:0003824,catalytic activity; GO:0016787,hydrolase activity; GO:0016788,hydrolase activity, acting on ester bonds; GO:0052689,carboxylic ester hydrolase activity; GO:0008150,biological_process; GO:0009987,cellular process; GO:0016043,cellular component org…
IFM89_005239	GO:0005634,nucleus; GO:0003677,DNA binding; GO:0003700,DNA-binding transcription factor activity; GO:0046872,metal ion binding; GO:0042803,protein homodimerization activity; GO:0048653,anther development; GO:0009851,auxin biosynthetic process; GO:0009734,auxin-activated signaling pathway; GO:0009555,pollen development; GO:0045893,positive regulation of DNA-templated transcription; GO:0009733,resp…
IFM89_028800	GO:0048046,apoplast; GO:0009507,chloroplast; GO:0009570,chloroplast stroma; GO:0005737,cytoplasm; GO:0005829,cytosol; GO:0005777,peroxisome; GO:0000325,plant-type vacuole; GO:0005886,plasma membrane; GO:0009506,plasmodesma; GO:0009579,thylakoid; GO:0005507,copper ion binding; GO:0043295,glutathione binding; GO:0004602,glutathione peroxidase activity; GO:0004364,glutathione transferase activity; G…
IFM89_034610	GO:0005576,extracellular region; GO:0016298,lipase activity; GO:0016042,lipid catabolic process; GO:0003674,molecular_function; GO:0003824,catalytic activity; GO:0016787,hydrolase activity; GO:0016788,hydrolase activity, acting on ester bonds; GO:0006629,lipid metabolic process; GO:0008150,biological_process; GO:0008152,metabolic process; GO:0009056,catabolic process; GO:0044238,primary metabolic…
IFM89_005829	GO:0005634,nucleus; GO:0006952,defense response; GO:0051245,negative regulation of cellular defense response; GO:0043433,negative regulation of DNA-binding transcription factor activity; GO:0006950,response to stress; GO:0008150,biological_process; GO:0050896,response to stimulus; GO:0006968,cellular defense response; GO:0010185,regulation of cellular defense response; GO:0031347,regulation of de…
IFM89_011353	GO:0009507,chloroplast; GO:0009658,chloroplast organization; GO:0042793,plastid transcription; GO:0006996,organelle organization; GO:0008150,biological_process; GO:0009657,plastid organization; GO:0009987,cellular process; GO:0016043,cellular component organization; GO:0071840,cellular component organization or biogenesis; GO:0006139,nucleobase-containing compound metabolic process; GO:0006351,DN…
novel.5766	GO:0016021,integral component of membrane; GO:0005886,plasma membrane; GO:0008285,negative regulation of cell population proliferation; GO:0048367,shoot system development; GO:0008150,biological_process; GO:0008283,cell population proliferation; GO:0009987,cellular process; GO:0042127,regulation of cell population proliferation; GO:0048519,negative regulation of biological process; GO:0048523,neg…
IFM89_002663	GO:0005886,plasma membrane; GO:0016567,protein ubiquitination; GO:0006807,nitrogen compound metabolic process; GO:0008150,biological_process; GO:0008152,metabolic process; GO:0019538,protein metabolic process; GO:0032446,protein modification by small protein conjugation; GO:0036211,protein modification process; GO:0043170,macromolecule metabolic process; GO:0043412,macromolecule modification; GO:…
IFM89_007922	GO:0080008,Cul4-RING E3 ubiquitin ligase complex; GO:0005634,nucleus; GO:0071493,cellular response to UV-B; GO:0010224,response to UV-B; GO:0008150,biological_process; GO:0009314,response to radiation; GO:0009411,response to UV; GO:0009416,response to light stimulus; GO:0009628,response to abiotic stimulus; GO:0009987,cellular process; GO:0034644,cellular response to UV; GO:0050896,response to st…
IFM89_004908	GO:0005794,Golgi apparatus; GO:0016021,integral component of membrane; GO:0016020,membrane; GO:0005739,mitochondrion; GO:0000325,plant-type vacuole; GO:0009705,plant-type vacuole membrane; GO:0051119,sugar transmembrane transporter activity; GO:0022857,transmembrane transporter activity; GO:0042593,glucose homeostasis; GO:0010030,positive regulation of seed germination; GO:0055085,transmembrane t…
IFM89_037181	GO:0010494,cytoplasmic stress granule; GO:0005634,nucleus; GO:0008143,poly(A) binding; GO:0034605,cellular response to heat; GO:0006397,mRNA processing; GO:0003674,molecular_function; GO:0003676,nucleic acid binding; GO:0003723,RNA binding; GO:0003727,single-stranded RNA binding; GO:0005488,binding; GO:0070717,poly-purine tract binding; GO:0097159,organic cyclic compound binding; GO:1901363,heter…
IFM89_022002	GO:0005634,nucleus; GO:0003677,DNA binding; GO:0003700,DNA-binding transcription factor activity; GO:0043565,sequence-specific DNA binding; GO:0000976,transcription cis-regulatory region binding; GO:0071472,cellular response to salt stress; GO:0009736,cytokinin-activated signaling pathway; GO:0009873,ethylene-activated signaling pathway; GO:0045595,regulation of cell differentiation; GO:0009409,r…
IFM89_006109	GO:0009535,chloroplast thylakoid membrane; GO:0016021,integral component of membrane; GO:0009522,photosystem I; GO:0009523,photosystem II; GO:0016168,chlorophyll binding; GO:0046872,metal ion binding; GO:0009765,photosynthesis, light harvesting; GO:0003674,molecular_function; GO:0005488,binding; GO:0046906,tetrapyrrole binding; GO:0097159,organic cyclic compound binding; GO:1901363,heterocyclic c…
IFM89_039102	GO:0004791,thioredoxin-disulfide reductase activity; GO:0003674,molecular_function; GO:0003824,catalytic activity; GO:0015035,protein-disulfide reductase activity; GO:0015036,disulfide oxidoreductase activity; GO:0016209,antioxidant activity; GO:0016491,oxidoreductase activity; GO:0016667,oxidoreductase activity, acting on a sulfur group of donors; GO:0016668,oxidoreductase activity, acting on a …
IFM89_016685	GO:0031225,anchored component of membrane; GO:0046658,anchored component of plasma membrane; GO:0005576,extracellular region; GO:0005886,plasma membrane; GO:0009536,plastid; GO:0042973,glucan endo-1,3-beta-D-glucosidase activity; GO:0005975,carbohydrate metabolic process; GO:0071555,cell wall organization; GO:0006952,defense response; GO:0003674,molecular_function; GO:0003824,catalytic activity; …
IFM89_000387	GO:0005634,nucleus; GO:0003700,DNA-binding transcription factor activity; GO:0046872,metal ion binding; GO:0000976,transcription cis-regulatory region binding; GO:0010158,abaxial cell fate specification; GO:0045165,cell fate commitment; GO:0003674,molecular_function; GO:0140110,transcription regulator activity; GO:0005488,binding; GO:0043167,ion binding; GO:0043169,cation binding; GO:0001067,tran…
IFM89_037985	GO:0005739,mitochondrion; GO:0016554,cytidine to uridine editing; GO:0080156,mitochondrial mRNA modification; GO:0006397,mRNA processing; GO:0006139,nucleobase-containing compound metabolic process; GO:0006725,cellular aromatic compound metabolic process; GO:0006807,nitrogen compound metabolic process; GO:0008150,biological_process; GO:0008152,metabolic process; GO:0009451,RNA modification; GO:00…
IFM89_025569	GO:0009570,chloroplast stroma; GO:0005524,ATP binding; GO:0016851,magnesium chelatase activity; GO:0015995,chlorophyll biosynthetic process; GO:0015979,photosynthesis; GO:0000166,nucleotide binding; GO:0003674,molecular_function; GO:0005488,binding; GO:0017076,purine nucleotide binding; GO:0030554,adenyl nucleotide binding; GO:0032553,ribonucleotide binding; GO:0032555,purine ribonucleotide bindi…
IFM89_000506	GO:0009505,plant-type cell wall; GO:0020037,heme binding; GO:0046872,metal ion binding; GO:0004601,peroxidase activity; GO:0050832,defense response to fungus; GO:0042744,hydrogen peroxide catabolic process; GO:0006979,response to oxidative stress; GO:0048511,rhythmic process; GO:0003674,molecular_function; GO:0005488,binding; GO:0046906,tetrapyrrole binding; GO:0097159,organic cyclic compound bin…
IFM89_015017	GO:0009507,chloroplast; GO:0009941,chloroplast envelope; GO:0009534,chloroplast thylakoid; GO:0009535,chloroplast thylakoid membrane; GO:0016021,integral component of membrane; GO:0005743,mitochondrial inner membrane; GO:0005739,mitochondrion; GO:0009536,plastid; GO:0005524,ATP binding; GO:0016887,ATP hydrolysis activity; GO:0004176,ATP-dependent peptidase activity; GO:0046872,metal ion binding; …
IFM89_002800	GO:0030778,columbamine O-methyltransferase activity; GO:0008171,O-methyltransferase activity; GO:0046983,protein dimerization activity; GO:0030762,tetrahydrocolumbamine 2-O-methyltransferase activity; GO:0009820,alkaloid metabolic process; GO:0032259,methylation; GO:0003674,molecular_function; GO:0003824,catalytic activity; GO:0008168,methyltransferase activity; GO:0008757,S-adenosylmethionine-de…
IFM89_012552	GO:0009507,chloroplast; GO:0009941,chloroplast envelope; GO:0009570,chloroplast stroma; GO:0009536,plastid; GO:0004739,pyruvate dehydrogenase (acetyl-transferring) activity; GO:0006086,acetyl-CoA biosynthetic process from pyruvate; GO:0006096,glycolytic process; GO:0003674,molecular_function; GO:0003824,catalytic activity; GO:0004738,pyruvate dehydrogenase activity; GO:0016491,oxidoreductase acti…
IFM89_021790	GO:0005576,extracellular region; GO:0005507,copper ion binding; GO:0016491,oxidoreductase activity; GO:0003674,molecular_function; GO:0005488,binding; GO:0043167,ion binding; GO:0043169,cation binding; GO:0046872,metal ion binding; GO:0046914,transition metal ion binding; GO:0003824,catalytic activity; GO:0005575,cellular_component; GO:0110165,cellular anatomical entity
novel.8144	GO:0005789,endoplasmic reticulum membrane; GO:0016021,integral component of membrane; GO:0031966,mitochondrial membrane; GO:0005778,peroxisomal membrane; GO:0042170,plastid membrane; GO:0004420,hydroxymethylglutaryl-CoA reductase (NADPH) activity; GO:0015936,coenzyme A metabolic process; GO:0008299,isoprenoid biosynthetic process; GO:0016126,sterol biosynthetic process; GO:0003674,molecular_funct…
IFM89_008166	GO:0005829,cytosol; GO:0005576,extracellular region; GO:0005794,Golgi apparatus; GO:0009506,plasmodesma; GO:0052691,UDP-arabinopyranose mutase activity; GO:0071555,cell wall organization; GO:0030244,cellulose biosynthetic process; GO:0009832,plant-type cell wall biogenesis; GO:0006486,protein glycosylation; GO:0033356,UDP-L-arabinose metabolic process; GO:0003674,molecular_function; GO:0003824,ca…
IFM89_037698	GO:0005874,microtubule; GO:0015630,microtubule cytoskeleton; GO:0005524,ATP binding; GO:0008017,microtubule binding; GO:0003777,microtubule motor activity; GO:0007018,microtubule-based movement; GO:0007017,microtubule-based process; GO:0000166,nucleotide binding; GO:0003674,molecular_function; GO:0005488,binding; GO:0017076,purine nucleotide binding; GO:0030554,adenyl nucleotide binding; GO:00325…
IFM89_017984	GO:0005634,nucleus; GO:0003677,DNA binding; GO:0003674,molecular_function; GO:0003676,nucleic acid binding; GO:0005488,binding; GO:0097159,organic cyclic compound binding; GO:1901363,heterocyclic compound binding; GO:0005575,cellular_component; GO:0005622,intracellular anatomical structure; GO:0043226,organelle; GO:0043227,membrane-bounded organelle; GO:0043229,intracellular organelle; GO:0043231…
IFM89_006828	GO:0005576,extracellular region; GO:0005794,Golgi apparatus; GO:0009505,plant-type cell wall; GO:0008810,cellulase activity; GO:0071555,cell wall organization; GO:0030245,cellulose catabolic process; GO:0003674,molecular_function; GO:0003824,catalytic activity; GO:0004553,hydrolase activity, hydrolyzing O-glycosyl compounds; GO:0016787,hydrolase activity; GO:0016798,hydrolase activity, acting on …
novel.5081	GO:0004252,serine-type endopeptidase activity; GO:0006508,proteolysis; GO:0003674,molecular_function; GO:0003824,catalytic activity; GO:0004175,endopeptidase activity; GO:0008233,peptidase activity; GO:0008236,serine-type peptidase activity; GO:0016787,hydrolase activity; GO:0017171,serine hydrolase activity; GO:0140096,catalytic activity, acting on a protein; GO:0006807,nitrogen compound metabol…
IFM89_018724	GO:0005634,nucleus; GO:0046872,metal ion binding; GO:0032502,developmental process; GO:0003674,molecular_function; GO:0005488,binding; GO:0043167,ion binding; GO:0043169,cation binding; GO:0008150,biological_process; GO:0005575,cellular_component; GO:0005622,intracellular anatomical structure; GO:0043226,organelle; GO:0043227,membrane-bounded organelle; GO:0043229,intracellular organelle; GO:0043…
IFM89_007623	GO:0030778,columbamine O-methyltransferase activity; GO:0008171,O-methyltransferase activity; GO:0046983,protein dimerization activity; GO:0030762,tetrahydrocolumbamine 2-O-methyltransferase activity; GO:0009820,alkaloid metabolic process; GO:0032259,methylation; GO:0003674,molecular_function; GO:0003824,catalytic activity; GO:0008168,methyltransferase activity; GO:0008757,S-adenosylmethionine-de…
novel.5628	GO:0016021,integral component of membrane; GO:0048193,Golgi vesicle transport; GO:0015031,protein transport; GO:0006810,transport; GO:0008150,biological_process; GO:0016192,vesicle-mediated transport; GO:0051179,localization; GO:0051234,establishment of localization; GO:0008104,protein localization; GO:0009987,cellular process; GO:0033036,macromolecule localization; GO:0045184,establishment of pr…
IFM89_002155	GO:0031969,chloroplast membrane; GO:0016021,integral component of membrane; GO:0005743,mitochondrial inner membrane; GO:0000095,S-adenosyl-L-methionine transmembrane transporter activity; GO:0003674,molecular_function; GO:0005215,transporter activity; GO:0008324,cation transmembrane transporter activity; GO:0015075,ion transmembrane transporter activity; GO:0015101,organic cation transmembrane tr…
IFM89_011673	GO:0005737,cytoplasm; GO:0005829,cytosol; GO:0005634,nucleus; GO:0016853,isomerase activity; GO:0005975,carbohydrate metabolic process; GO:0006281,DNA repair; GO:0003674,molecular_function; GO:0003824,catalytic activity; GO:0008150,biological_process; GO:0008152,metabolic process; GO:0044238,primary metabolic process; GO:0071704,organic substance metabolic process; GO:0006139,nucleobase-containin…
IFM89_038631	GO:0005775,vacuolar lumen; GO:0033793,aureusidin synthase activity; GO:0102706,butein:oxygen oxidoreductase activity; GO:0004097,catechol oxidase activity; GO:0005507,copper ion binding; GO:0102791,sulfuretin synthase activity; GO:0046148,pigment biosynthetic process; GO:0003674,molecular_function; GO:0003824,catalytic activity; GO:0016491,oxidoreductase activity; GO:0046992,oxidoreductase activi…
IFM89_016403	GO:0005829,cytosol; GO:0005634,nucleus; GO:0010427,abscisic acid binding; GO:0004864,protein phosphatase inhibitor activity; GO:0038023,signaling receptor activity; GO:0009738,abscisic acid-activated signaling pathway; GO:0006952,defense response; GO:0003674,molecular_function; GO:0005488,binding; GO:0008289,lipid binding; GO:0019840,isoprenoid binding; GO:0031406,carboxylic acid binding; GO:0033…
IFM89_005286	GO:0009507,chloroplast; GO:0005739,mitochondrion; GO:0010287,plastoglobule; GO:0008168,methyltransferase activity; GO:0032259,methylation; GO:0006744,ubiquinone biosynthetic process; GO:0003674,molecular_function; GO:0003824,catalytic activity; GO:0016740,transferase activity; GO:0016741,transferase activity, transferring one-carbon groups; GO:0008150,biological_process; GO:0008152,metabolic proc…
IFM89_033908	GO:0000139,Golgi membrane; GO:0016021,integral component of membrane; GO:0005887,integral component of plasma membrane; GO:0008515,sucrose transmembrane transporter activity; GO:0051119,sugar transmembrane transporter activity; GO:0008643,carbohydrate transport; GO:0071215,cellular response to abscisic acid stimulus; GO:0071470,cellular response to osmotic stress; GO:0071446,cellular response to …
IFM89_002001	GO:0009507,chloroplast; GO:0016020,membrane; GO:0071949,FAD binding; GO:0052662,zeaxanthin epoxidase activity; GO:0009688,abscisic acid biosynthetic process; GO:0000166,nucleotide binding; GO:0003674,molecular_function; GO:0005488,binding; GO:0036094,small molecule binding; GO:0043167,ion binding; GO:0043168,anion binding; GO:0050660,flavin adenine dinucleotide binding; GO:0097159,organic cyclic …
IFM89_015237	GO:0048046,apoplast; GO:0005737,cytoplasm; GO:0005829,cytosol; GO:0005576,extracellular region; GO:0016831,carboxy-lyase activity; GO:0071555,cell wall organization; GO:0003674,molecular_function; GO:0003824,catalytic activity; GO:0016829,lyase activity; GO:0016830,carbon-carbon lyase activity; GO:0008150,biological_process; GO:0009987,cellular process; GO:0016043,cellular component organization;…
novel.6860	GO:0009408,response to heat; GO:0006950,response to stress; GO:0008150,biological_process; GO:0009266,response to temperature stimulus; GO:0009628,response to abiotic stimulus; GO:0050896,response to stimulus
IFM89_001289	GO:0016021,integral component of membrane; GO:0005575,cellular_component; GO:0016020,membrane; GO:0031224,intrinsic component of membrane; GO:0110165,cellular anatomical entity
IFM89_037118	GO:0015934,large ribosomal subunit; GO:0003723,RNA binding; GO:0003735,structural constituent of ribosome; GO:0006412,translation; GO:0003674,molecular_function; GO:0003676,nucleic acid binding; GO:0005488,binding; GO:0097159,organic cyclic compound binding; GO:1901363,heterocyclic compound binding; GO:0005198,structural molecule activity; GO:0006518,peptide metabolic process; GO:0006807,nitrogen…
IFM89_019192	GO:0005789,endoplasmic reticulum membrane; GO:0016021,integral component of membrane; GO:0020037,heme binding; GO:0005506,iron ion binding; GO:0004497,monooxygenase activity; GO:0016705,oxidoreductase activity, acting on paired donors, with incorporation or reduction of molecular oxygen; GO:0009835,fruit ripening; GO:0003674,molecular_function; GO:0005488,binding; GO:0046906,tetrapyrrole binding;…
IFM89_028155	GO:0000139,Golgi membrane; GO:0005886,plasma membrane; GO:0015031,protein transport; GO:0006810,transport; GO:0008104,protein localization; GO:0008150,biological_process; GO:0009987,cellular process; GO:0033036,macromolecule localization; GO:0045184,establishment of protein localization; GO:0051179,localization; GO:0051234,establishment of localization; GO:0051641,cellular localization; GO:007072…
IFM89_001628	GO:0005576,extracellular region; GO:0045330,aspartyl esterase activity; GO:0030599,pectinesterase activity; GO:0046910,pectinesterase inhibitor activity; GO:0042545,cell wall modification; GO:0045490,pectin catabolic process; GO:0003674,molecular_function; GO:0003824,catalytic activity; GO:0016787,hydrolase activity; GO:0016788,hydrolase activity, acting on ester bonds; GO:0052689,carboxylic este…
IFM89_026409	GO:0005887,integral component of plasma membrane; GO:0016020,membrane; GO:0035673,oligopeptide transmembrane transporter activity; GO:0015031,protein transport; GO:0003674,molecular_function; GO:0005215,transporter activity; GO:0022857,transmembrane transporter activity; GO:0042887,amide transmembrane transporter activity; GO:1904680,peptide transmembrane transporter activity; GO:0006810,transpor…
IFM89_012802	GO:0009507,chloroplast; GO:0009570,chloroplast stroma; GO:0005829,cytosol; GO:0005886,plasma membrane; GO:0010181,FMN binding; GO:0050136,NADH dehydrogenase (quinone) activity; GO:0008753,NADPH dehydrogenase (quinone) activity; GO:0000166,nucleotide binding; GO:0003674,molecular_function; GO:0005488,binding; GO:0032553,ribonucleotide binding; GO:0036094,small molecule binding; GO:0043167,ion bind…
IFM89_030679	GO:0005634,nucleus; GO:0046872,metal ion binding; GO:0010078,maintenance of root meristem identity; GO:2000377,regulation of reactive oxygen species metabolic process; GO:2000280,regulation of root development; GO:0043434,response to peptide hormone; GO:0003674,molecular_function; GO:0005488,binding; GO:0043167,ion binding; GO:0043169,cation binding; GO:0007275,multicellular organism development;…
IFM89_009200	GO:0005634,nucleus; GO:0003700,DNA-binding transcription factor activity; GO:0000976,transcription cis-regulatory region binding; GO:0051301,cell division; GO:0006952,defense response; GO:0009873,ethylene-activated signaling pathway; GO:0010087,phloem or xylem histogenesis; GO:0009624,response to nematode; GO:0003674,molecular_function; GO:0140110,transcription regulator activity; GO:0001067,tran…
IFM89_005737	GO:0005576,extracellular region; GO:0006952,defense response; GO:0006950,response to stress; GO:0008150,biological_process; GO:0050896,response to stimulus; GO:0005575,cellular_component; GO:0110165,cellular anatomical entity
IFM89_023483	GO:0005794,Golgi apparatus; GO:0016021,integral component of membrane; GO:0005886,plasma membrane; GO:0009506,plasmodesma; GO:0005773,vacuole; GO:0009734,auxin-activated signaling pathway; GO:0050829,defense response to Gram-negative bacterium; GO:0007154,cell communication; GO:0007165,signal transduction; GO:0008150,biological_process; GO:0009719,response to endogenous stimulus; GO:0009725,respo…
novel.4057	GO:0016021,integral component of membrane; GO:0005525,GTP binding; GO:0000166,nucleotide binding; GO:0003674,molecular_function; GO:0005488,binding; GO:0017076,purine nucleotide binding; GO:0019001,guanyl nucleotide binding; GO:0032553,ribonucleotide binding; GO:0032555,purine ribonucleotide binding; GO:0032561,guanyl ribonucleotide binding; GO:0035639,purine ribonucleoside triphosphate binding; …
IFM89_016204	GO:0005634,nucleus; GO:0004860,protein kinase inhibitor activity; GO:0007049,cell cycle; GO:0045839,negative regulation of mitotic nuclear division; GO:0032875,regulation of DNA endoreduplication; GO:0003674,molecular_function; GO:0004857,enzyme inhibitor activity; GO:0019207,kinase regulator activity; GO:0019210,kinase inhibitor activity; GO:0019887,protein kinase regulator activity; GO:0030234,…
novel.6141	GO:0031305,integral component of mitochondrial inner membrane; GO:0005739,mitochondrion; GO:0000325,plant-type vacuole; GO:0005886,plasma membrane; GO:0009536,plastid; GO:0050833,pyruvate transmembrane transporter activity; GO:0006850,mitochondrial pyruvate transmembrane transport; GO:0010119,regulation of stomatal movement; GO:0003674,molecular_function; GO:0005215,transporter activity; GO:00053…
IFM89_004670	GO:0005576,extracellular region; GO:0033907,beta-D-fucosidase activity; GO:0004565,beta-galactosidase activity; GO:0008422,beta-glucosidase activity; GO:0102483,scopolin beta-glucosidase activity; GO:0005975,carbohydrate metabolic process; GO:0003674,molecular_function; GO:0003824,catalytic activity; GO:0004553,hydrolase activity, hydrolyzing O-glycosyl compounds; GO:0016787,hydrolase activity; G…
IFM89_023154	GO:0016757,glycosyltransferase activity; GO:0005992,trehalose biosynthetic process; GO:0070413,trehalose metabolism in response to stress; GO:0003674,molecular_function; GO:0003824,catalytic activity; GO:0016740,transferase activity; GO:0005975,carbohydrate metabolic process; GO:0005984,disaccharide metabolic process; GO:0005991,trehalose metabolic process; GO:0008150,biological_process; GO:00081…
IFM89_002891	GO:0005829,cytosol; GO:0043186,P granule; GO:0005524,ATP binding; GO:0016887,ATP hydrolysis activity; GO:0003723,RNA binding; GO:0003724,RNA helicase activity; GO:0035194,post-transcriptional gene silencing by RNA; GO:0009616,RNAi-mediated antiviral immune response; GO:0000166,nucleotide binding; GO:0003674,molecular_function; GO:0005488,binding; GO:0017076,purine nucleotide binding; GO:0030554,a…
novel.7931	GO:0016021,integral component of membrane; GO:0005575,cellular_component; GO:0016020,membrane; GO:0031224,intrinsic component of membrane; GO:0110165,cellular anatomical entity
IFM89_002813	GO:0005789,endoplasmic reticulum membrane; GO:0016021,integral component of membrane; GO:0020037,heme binding; GO:0005506,iron ion binding; GO:0047087,protopine 6-monooxygenase activity; GO:0033075,isoquinoline alkaloid biosynthetic process; GO:0003674,molecular_function; GO:0005488,binding; GO:0046906,tetrapyrrole binding; GO:0097159,organic cyclic compound binding; GO:1901363,heterocyclic compo…
IFM89_018021	GO:0010181,FMN binding; GO:0016491,oxidoreductase activity; GO:0006633,fatty acid biosynthetic process; GO:0031408,oxylipin biosynthetic process; GO:0000166,nucleotide binding; GO:0003674,molecular_function; GO:0005488,binding; GO:0032553,ribonucleotide binding; GO:0036094,small molecule binding; GO:0043167,ion binding; GO:0043168,anion binding; GO:0097159,organic cyclic compound binding; GO:0097…
IFM89_027023	GO:0005789,endoplasmic reticulum membrane; GO:0016021,integral component of membrane; GO:0020037,heme binding; GO:0005506,iron ion binding; GO:0004497,monooxygenase activity; GO:0016705,oxidoreductase activity, acting on paired donors, with incorporation or reduction of molecular oxygen; GO:0009835,fruit ripening; GO:0003674,molecular_function; GO:0005488,binding; GO:0046906,tetrapyrrole binding;…
IFM89_005627	GO:0005829,cytosol; GO:0005634,nucleus; GO:0003677,DNA binding; GO:0003700,DNA-binding transcription factor activity; GO:0000156,phosphorelay response regulator activity; GO:0071368,cellular response to cytokinin stimulus; GO:0009736,cytokinin-activated signaling pathway; GO:0009873,ethylene-activated signaling pathway; GO:0010150,leaf senescence; GO:0010082,regulation of root meristem growth; GO…
IFM89_036810	GO:0016021,integral component of membrane; GO:0005886,plasma membrane; GO:0022857,transmembrane transporter activity; GO:0003674,molecular_function; GO:0005215,transporter activity; GO:0005575,cellular_component; GO:0016020,membrane; GO:0031224,intrinsic component of membrane; GO:0110165,cellular anatomical entity; GO:0071944,cell periphery
IFM89_021552	GO:0005634,nucleus; GO:0008270,zinc ion binding; GO:0009909,regulation of flower development; GO:0003674,molecular_function; GO:0005488,binding; GO:0043167,ion binding; GO:0043169,cation binding; GO:0046872,metal ion binding; GO:0046914,transition metal ion binding; GO:0000003,reproduction; GO:0003006,developmental process involved in reproduction; GO:0007275,multicellular organism development; G…
IFM89_037153	GO:0005634,nucleus; GO:0005886,plasma membrane; GO:0005524,ATP binding; GO:0106310,protein serine kinase activity; GO:0004674,protein serine/threonine kinase activity; GO:0006952,defense response; GO:0006468,protein phosphorylation; GO:0000166,nucleotide binding; GO:0003674,molecular_function; GO:0005488,binding; GO:0017076,purine nucleotide binding; GO:0030554,adenyl nucleotide binding; GO:00325…
IFM89_008212	GO:0009507,chloroplast; GO:0004311,farnesyltranstransferase activity; GO:0016767,geranylgeranyl-diphosphate geranylgeranyltransferase activity; GO:0016117,carotenoid biosynthetic process; GO:0003674,molecular_function; GO:0003824,catalytic activity; GO:0004659,prenyltransferase activity; GO:0016740,transferase activity; GO:0016765,transferase activity, transferring alkyl or aryl (other than methy…
IFM89_007744	GO:0046872,metal ion binding; GO:0006281,DNA repair; GO:0003674,molecular_function; GO:0005488,binding; GO:0043167,ion binding; GO:0043169,cation binding; GO:0006139,nucleobase-containing compound metabolic process; GO:0006259,DNA metabolic process; GO:0006725,cellular aromatic compound metabolic process; GO:0006807,nitrogen compound metabolic process; GO:0006950,response to stress; GO:0006974,ce…
IFM89_023300	GO:0016021,integral component of membrane; GO:0016020,membrane; GO:0000325,plant-type vacuole; GO:0005774,vacuolar membrane; GO:0005773,vacuole; GO:0015297,antiporter activity; GO:0022857,transmembrane transporter activity; GO:0042910,xenobiotic transmembrane transporter activity; GO:1990961,xenobiotic detoxification by transmembrane export across the plasma membrane; GO:0003674,molecular_functio…
IFM89_003476	GO:0005886,plasma membrane; GO:0005524,ATP binding; GO:0106310,protein serine kinase activity; GO:0004674,protein serine/threonine kinase activity; GO:0006952,defense response; GO:0031663,lipopolysaccharide-mediated signaling pathway; GO:0002221,pattern recognition receptor signaling pathway; GO:0006468,protein phosphorylation; GO:0000166,nucleotide binding; GO:0003674,molecular_function; GO:0005…
IFM89_021705	GO:0005634,nucleus; GO:0003677,DNA binding; GO:0003700,DNA-binding transcription factor activity; GO:0009734,auxin-activated signaling pathway; GO:0007623,circadian rhythm; GO:0010600,regulation of auxin biosynthetic process; GO:0006355,regulation of DNA-templated transcription; GO:0003674,molecular_function; GO:0003676,nucleic acid binding; GO:0005488,binding; GO:0097159,organic cyclic compound …
IFM89_024002	GO:0005615,extracellular space; GO:0005764,lysosome; GO:0010282,senescence-associated vacuole; GO:0004197,cysteine-type endopeptidase activity; GO:0007568,aging; GO:0010150,leaf senescence; GO:0010623,programmed cell death involved in cell development; GO:0051603,proteolysis involved in protein catabolic process; GO:0009737,response to abscisic acid; GO:0009723,response to ethylene; GO:0009739,re…
IFM89_018347	GO:0005199,structural constituent of cell wall; GO:0009664,plant-type cell wall organization; GO:0003674,molecular_function; GO:0005198,structural molecule activity; GO:0008150,biological_process; GO:0009987,cellular process; GO:0016043,cellular component organization; GO:0045229,external encapsulating structure organization; GO:0071554,cell wall organization or biogenesis; GO:0071555,cell wall o…
IFM89_023108	GO:0005829,cytosol; GO:0005575,cellular_component; GO:0005622,intracellular anatomical structure; GO:0005737,cytoplasm; GO:0110165,cellular anatomical entity
IFM89_011974	GO:0016021,integral component of membrane; GO:0016020,membrane; GO:0005739,mitochondrion; GO:0000741,karyogamy; GO:0010197,polar nucleus fusion; GO:0009651,response to salt stress; GO:0006996,organelle organization; GO:0006997,nucleus organization; GO:0008150,biological_process; GO:0009987,cellular process; GO:0016043,cellular component organization; GO:0048284,organelle fusion; GO:0071840,cellul…
IFM89_018143	GO:0005737,cytoplasm; GO:0005829,cytosol; GO:0043295,glutathione binding; GO:0004364,glutathione transferase activity; GO:0006749,glutathione metabolic process; GO:0009407,toxin catabolic process; GO:0003674,molecular_function; GO:0005488,binding; GO:0033218,amide binding; GO:0042277,peptide binding; GO:0043167,ion binding; GO:0043168,anion binding; GO:0072341,modified amino acid binding; GO:1900…
IFM89_012231	GO:0009507,chloroplast; GO:0005575,cellular_component; GO:0005622,intracellular anatomical structure; GO:0005737,cytoplasm; GO:0009536,plastid; GO:0043226,organelle; GO:0043227,membrane-bounded organelle; GO:0043229,intracellular organelle; GO:0043231,intracellular membrane-bounded organelle; GO:0110165,cellular anatomical entity
IFM89_006860	GO:0005874,microtubule; GO:0005524,ATP binding; GO:0016887,ATP hydrolysis activity; GO:0008017,microtubule binding; GO:0003777,microtubule motor activity; GO:0007018,microtubule-based movement; GO:0000166,nucleotide binding; GO:0003674,molecular_function; GO:0005488,binding; GO:0017076,purine nucleotide binding; GO:0030554,adenyl nucleotide binding; GO:0032553,ribonucleotide binding; GO:0032555,p…
IFM89_034940	GO:0019005,SCF ubiquitin ligase complex; GO:0016567,protein ubiquitination; GO:0006807,nitrogen compound metabolic process; GO:0008150,biological_process; GO:0008152,metabolic process; GO:0019538,protein metabolic process; GO:0032446,protein modification by small protein conjugation; GO:0036211,protein modification process; GO:0043170,macromolecule metabolic process; GO:0043412,macromolecule modi…
IFM89_038306	GO:0009507,chloroplast; GO:0005737,cytoplasm; GO:0005634,nucleus; GO:0005575,cellular_component; GO:0005622,intracellular anatomical structure; GO:0009536,plastid; GO:0043226,organelle; GO:0043227,membrane-bounded organelle; GO:0043229,intracellular organelle; GO:0043231,intracellular membrane-bounded organelle; GO:0110165,cellular anatomical entity
IFM89_032183	GO:0005886,plasma membrane; GO:0005524,ATP binding; GO:0106310,protein serine kinase activity; GO:0004674,protein serine/threonine kinase activity; GO:0000976,transcription cis-regulatory region binding; GO:0006952,defense response; GO:0006468,protein phosphorylation; GO:0000166,nucleotide binding; GO:0003674,molecular_function; GO:0005488,binding; GO:0017076,purine nucleotide binding; GO:0030554…
IFM89_018163	GO:0005634,nucleus; GO:0003700,DNA-binding transcription factor activity; GO:0003674,molecular_function; GO:0140110,transcription regulator activity; GO:0005575,cellular_component; GO:0005622,intracellular anatomical structure; GO:0043226,organelle; GO:0043227,membrane-bounded organelle; GO:0043229,intracellular organelle; GO:0043231,intracellular membrane-bounded organelle; GO:0110165,cellular a…
IFM89_001627	GO:0005576,extracellular region; GO:0045330,aspartyl esterase activity; GO:0030599,pectinesterase activity; GO:0046910,pectinesterase inhibitor activity; GO:0042545,cell wall modification; GO:0045490,pectin catabolic process; GO:0003674,molecular_function; GO:0003824,catalytic activity; GO:0016787,hydrolase activity; GO:0016788,hydrolase activity, acting on ester bonds; GO:0052689,carboxylic este…
IFM89_038001	GO:0016021,integral component of membrane; GO:0020037,heme binding; GO:0005506,iron ion binding; GO:0004497,monooxygenase activity; GO:0016705,oxidoreductase activity, acting on paired donors, with incorporation or reduction of molecular oxygen; GO:0003674,molecular_function; GO:0005488,binding; GO:0046906,tetrapyrrole binding; GO:0097159,organic cyclic compound binding; GO:1901363,heterocyclic c…
novel.4851	GO:0016021,integral component of membrane; GO:0004553,hydrolase activity, hydrolyzing O-glycosyl compounds; GO:0005975,carbohydrate metabolic process; GO:0003674,molecular_function; GO:0003824,catalytic activity; GO:0016787,hydrolase activity; GO:0016798,hydrolase activity, acting on glycosyl bonds; GO:0008150,biological_process; GO:0008152,metabolic process; GO:0044238,primary metabolic process;…
IFM89_028659	GO:0005829,cytosol; GO:0005739,mitochondrion; GO:0009506,plasmodesma; GO:0008460,dTDP-glucose 4,6-dehydratase activity; GO:0016853,isomerase activity; GO:0016491,oxidoreductase activity; GO:0050377,UDP-glucose 4,6-dehydratase activity; GO:0010280,UDP-L-rhamnose synthase activity; GO:0010315,auxin export across the plasma membrane; GO:0030154,cell differentiation; GO:0071555,cell wall organization…
IFM89_035749	GO:0005634,nucleus; GO:0005524,ATP binding; GO:0000976,transcription cis-regulatory region binding; GO:0008285,negative regulation of cell population proliferation; GO:0061062,regulation of nematode larval development; GO:0006355,regulation of DNA-templated transcription; GO:0009409,response to cold; GO:0009739,response to gibberellin; GO:0009624,response to nematode; GO:0048364,root development;…
novel.8586	GO:0005737,cytoplasm; GO:0004512,inositol-3-phosphate synthase activity; GO:0006021,inositol biosynthetic process; GO:0008654,phospholipid biosynthetic process; GO:0003674,molecular_function; GO:0003824,catalytic activity; GO:0016853,isomerase activity; GO:0016872,intramolecular lyase activity; GO:0005975,carbohydrate metabolic process; GO:0006020,inositol metabolic process; GO:0006066,alcohol me…
IFM89_020932	GO:0008234,cysteine-type peptidase activity; GO:0006508,proteolysis; GO:0003674,molecular_function; GO:0003824,catalytic activity; GO:0008233,peptidase activity; GO:0016787,hydrolase activity; GO:0140096,catalytic activity, acting on a protein; GO:0006807,nitrogen compound metabolic process; GO:0008150,biological_process; GO:0008152,metabolic process; GO:0019538,protein metabolic process; GO:0043…
novel.8968	GO:0005737,cytoplasm; GO:0005634,nucleus; GO:0008104,protein localization; GO:0007165,signal transduction; GO:0008150,biological_process; GO:0009987,cellular process; GO:0033036,macromolecule localization; GO:0051179,localization; GO:0051641,cellular localization; GO:0070727,cellular macromolecule localization; GO:0007154,cell communication; GO:0023052,signaling; GO:0050789,regulation of biologic…
IFM89_012604	GO:0050474,(S)-norcoclaurine synthase activity; GO:0046872,metal ion binding; GO:0016491,oxidoreductase activity; GO:0009820,alkaloid metabolic process; GO:0003674,molecular_function; GO:0003824,catalytic activity; GO:0016829,lyase activity; GO:0016835,carbon-oxygen lyase activity; GO:0016836,hydro-lyase activity; GO:0005488,binding; GO:0043167,ion binding; GO:0043169,cation binding; GO:0006807,n…
IFM89_001020	GO:0008171,O-methyltransferase activity; GO:0046983,protein dimerization activity; GO:0008757,S-adenosylmethionine-dependent methyltransferase activity; GO:0019438,aromatic compound biosynthetic process; GO:0032259,methylation; GO:0009699,phenylpropanoid biosynthetic process; GO:0009611,response to wounding; GO:0003674,molecular_function; GO:0003824,catalytic activity; GO:0008168,methyltransferas…
IFM89_025180	GO:0005737,cytoplasm; GO:0005886,plasma membrane; GO:0008289,lipid binding; GO:0007049,cell cycle; GO:0051301,cell division; GO:0003674,molecular_function; GO:0005488,binding; GO:0008150,biological_process; GO:0009987,cellular process; GO:0005575,cellular_component; GO:0005622,intracellular anatomical structure; GO:0110165,cellular anatomical entity; GO:0016020,membrane; GO:0071944,cell periphery
IFM89_003512	GO:0016021,integral component of membrane; GO:0005886,plasma membrane; GO:0005524,ATP binding; GO:0106310,protein serine kinase activity; GO:0004674,protein serine/threonine kinase activity; GO:0006468,protein phosphorylation; GO:0051302,regulation of cell division; GO:0048364,root development; GO:0000166,nucleotide binding; GO:0003674,molecular_function; GO:0005488,binding; GO:0017076,purine nuc…
IFM89_030162	GO:0005634,nucleus; GO:0005524,ATP binding; GO:0042802,identical protein binding; GO:0004672,protein kinase activity; GO:0009640,photomorphogenesis; GO:0006468,protein phosphorylation; GO:0009585,red, far-red light phototransduction; GO:0000166,nucleotide binding; GO:0003674,molecular_function; GO:0005488,binding; GO:0017076,purine nucleotide binding; GO:0030554,adenyl nucleotide binding; GO:0032…
novel.6905	GO:0005634,nucleus; GO:0008270,zinc ion binding; GO:0006355,regulation of DNA-templated transcription; GO:0003674,molecular_function; GO:0005488,binding; GO:0043167,ion binding; GO:0043169,cation binding; GO:0046872,metal ion binding; GO:0046914,transition metal ion binding; GO:0006139,nucleobase-containing compound metabolic process; GO:0006351,DNA-templated transcription; GO:0006725,cellular ar…
IFM89_014080	GO:0016021,integral component of membrane; GO:0005886,plasma membrane; GO:0009506,plasmodesma; GO:0005524,ATP binding; GO:0016301,kinase activity; GO:0004672,protein kinase activity; GO:0106310,protein serine kinase activity; GO:0004674,protein serine/threonine kinase activity; GO:0052545,callose localization; GO:0046777,protein autophosphorylation; GO:0006468,protein phosphorylation; GO:0072593,…
IFM89_021643	GO:0005524,ATP binding; GO:0004672,protein kinase activity; GO:0006468,protein phosphorylation; GO:0000166,nucleotide binding; GO:0003674,molecular_function; GO:0005488,binding; GO:0017076,purine nucleotide binding; GO:0030554,adenyl nucleotide binding; GO:0032553,ribonucleotide binding; GO:0032555,purine ribonucleotide binding; GO:0032559,adenyl ribonucleotide binding; GO:0035639,purine ribonucl…
IFM89_005318	GO:0005829,cytosol; GO:0019898,extrinsic component of membrane; GO:0034045,phagophore assembly site membrane; GO:0005774,vacuolar membrane; GO:0080025,phosphatidylinositol-3,5-bisphosphate binding; GO:0032266,phosphatidylinositol-3-phosphate binding; GO:0000422,autophagy of mitochondrion; GO:0044804,autophagy of nucleus; GO:0006497,protein lipidation; GO:0034497,protein localization to phagophore…
IFM89_017151	GO:0000307,cyclin-dependent protein kinase holoenzyme complex; GO:0005737,cytoplasm; GO:0005634,nucleus; GO:0016538,cyclin-dependent protein serine/threonine kinase regulator activity; GO:0051301,cell division; GO:0044772,mitotic cell cycle phase transition; GO:0000079,regulation of cyclin-dependent protein serine/threonine kinase activity; GO:0003674,molecular_function; GO:0019207,kinase regulat…
IFM89_025586	GO:0005737,cytoplasm; GO:0045548,phenylalanine ammonia-lyase activity; GO:0009800,cinnamic acid biosynthetic process; GO:0006559,L-phenylalanine catabolic process; GO:0003674,molecular_function; GO:0003824,catalytic activity; GO:0016829,lyase activity; GO:0016840,carbon-nitrogen lyase activity; GO:0016841,ammonia-lyase activity; GO:0006082,organic acid metabolic process; GO:0006725,cellular aroma…
IFM89_037989	GO:0005737,cytoplasm; GO:0005634,nucleus; GO:0005886,plasma membrane; GO:0005524,ATP binding; GO:0005509,calcium ion binding; GO:0009931,calcium-dependent protein serine/threonine kinase activity; GO:0005516,calmodulin binding; GO:0004683,calmodulin-dependent protein kinase activity; GO:0106310,protein serine kinase activity; GO:0035556,intracellular signal transduction; GO:0018105,peptidyl-serin…
novel.6947	GO:0034707,chloride channel complex; GO:0043231,intracellular membrane-bounded organelle; GO:0000325,plant-type vacuole; GO:0009705,plant-type vacuole membrane; GO:0009536,plastid; GO:0015108,chloride transmembrane transporter activity; GO:0005247,voltage-gated chloride channel activity; GO:0034765,regulation of ion transmembrane transport; GO:0003674,molecular_function; GO:0005215,transporter ac…
IFM89_007702	GO:0000785,chromatin; GO:0000118,histone deacetylase complex; GO:0005634,nucleus; GO:0031490,chromatin DNA binding; GO:0032454,histone H3-methyl-lysine-9 demethylase activity; GO:0003712,transcription coregulator activity; GO:0033169,histone H3-K9 demethylation; GO:0051567,histone H3-K9 methylation; GO:0006357,regulation of transcription by RNA polymerase II; GO:2000039,regulation of trichome mor…
IFM89_015456	GO:0016021,integral component of membrane; GO:0020037,heme binding; GO:0005506,iron ion binding; GO:0016709,oxidoreductase activity, acting on paired donors, with incorporation or reduction of molecular oxygen, NAD(P)H as one donor, and incorporation of one atom of oxygen; GO:0035336,long-chain fatty-acyl-CoA metabolic process; GO:0003674,molecular_function; GO:0005488,binding; GO:0046906,tetrapy…
IFM89_026039	GO:0005737,cytoplasm; GO:0005634,nucleus; GO:0005886,plasma membrane; GO:0005524,ATP binding; GO:0005509,calcium ion binding; GO:0009931,calcium-dependent protein serine/threonine kinase activity; GO:0005516,calmodulin binding; GO:0004683,calmodulin-dependent protein kinase activity; GO:0106310,protein serine kinase activity; GO:0004674,protein serine/threonine kinase activity; GO:0035556,intrace…
IFM89_003849	GO:0005634,nucleus; GO:0005509,calcium ion binding; GO:0030374,nuclear receptor coactivator activity; GO:0006355,regulation of DNA-templated transcription; GO:0009651,response to salt stress; GO:0055078,sodium ion homeostasis; GO:0003674,molecular_function; GO:0005488,binding; GO:0043167,ion binding; GO:0043169,cation binding; GO:0046872,metal ion binding; GO:0003712,transcription coregulator act…
IFM89_033152	GO:0016607,nuclear speck; GO:0005634,nucleus; GO:2000028,regulation of photoperiodism, flowering; GO:2000070,regulation of response to water deprivation; GO:0046686,response to cadmium ion; GO:0046688,response to copper ion; GO:0010218,response to far red light; GO:0009416,response to light stimulus; GO:0006979,response to oxidative stress; GO:0010114,response to red light; GO:0009611,response to…
IFM89_038132	GO:0005847,mRNA cleavage and polyadenylation specificity factor complex; GO:0005634,nucleus; GO:0008409,5'-3' exonuclease activity; GO:0004521,endoribonuclease activity; GO:0003723,RNA binding; GO:0006398,mRNA 3'-end processing by stem-loop binding and cleavage; GO:0006378,mRNA polyadenylation; GO:0016180,snRNA processing; GO:0003674,molecular_function; GO:0003824,catalytic activity; GO:0004518,n…
novel.8583	GO:0009535,chloroplast thylakoid membrane; GO:0016021,integral component of membrane; GO:0009523,photosystem II; GO:0016168,chlorophyll binding; GO:0009768,photosynthesis, light harvesting in photosystem I; GO:0009416,response to light stimulus; GO:0003674,molecular_function; GO:0005488,binding; GO:0046906,tetrapyrrole binding; GO:0097159,organic cyclic compound binding; GO:1901363,heterocyclic c…
IFM89_017062	GO:0005905,clathrin-coated pit; GO:0030136,clathrin-coated vesicle; GO:0005794,Golgi apparatus; GO:0005545,1-phosphatidylinositol binding; GO:0032050,clathrin heavy chain binding; GO:0005546,phosphatidylinositol-4,5-bisphosphate binding; GO:0000149,SNARE binding; GO:0048268,clathrin coat assembly; GO:0072583,clathrin-dependent endocytosis; GO:0006900,vesicle budding from membrane; GO:0003674,mole…
IFM89_035290	GO:0005737,cytoplasm; GO:0016281,eukaryotic translation initiation factor 4F complex; GO:0005634,nucleus; GO:0009536,plastid; GO:0003729,mRNA binding; GO:0003743,translation initiation factor activity; GO:0003674,molecular_function; GO:0003676,nucleic acid binding; GO:0003723,RNA binding; GO:0005488,binding; GO:0097159,organic cyclic compound binding; GO:1901363,heterocyclic compound binding; GO:…
IFM89_004603	GO:0031225,anchored component of membrane; GO:0046658,anchored component of plasma membrane; GO:0009897,external side of plasma membrane; GO:0016328,lateral plasma membrane; GO:0009930,longitudinal side of cell surface; GO:0009505,plant-type cell wall; GO:0010215,cellulose microfibril organization; GO:0009825,multidimensional cell growth; GO:0052324,plant-type cell wall cellulose biosynthetic pro…
IFM89_028313	GO:0010181,FMN binding; GO:0004733,pyridoxamine-phosphate oxidase activity; GO:0009443,pyridoxal 5'-phosphate salvage; GO:0008615,pyridoxine biosynthetic process; GO:0000166,nucleotide binding; GO:0003674,molecular_function; GO:0005488,binding; GO:0032553,ribonucleotide binding; GO:0036094,small molecule binding; GO:0043167,ion binding; GO:0043168,anion binding; GO:0097159,organic cyclic compound…
IFM89_007725	GO:0005829,cytosol; GO:0005524,ATP binding; GO:0047760,butyrate-CoA ligase activity; GO:0016405,CoA-ligase activity; GO:0043759,methylbutanoate-CoA ligase activity; GO:0050218,propionate-CoA ligase activity; GO:0000166,nucleotide binding; GO:0003674,molecular_function; GO:0005488,binding; GO:0017076,purine nucleotide binding; GO:0030554,adenyl nucleotide binding; GO:0032553,ribonucleotide binding…
IFM89_025193	GO:0016021,integral component of membrane; GO:0005575,cellular_component; GO:0016020,membrane; GO:0031224,intrinsic component of membrane; GO:0110165,cellular anatomical entity
IFM89_019072	GO:0005955,calcineurin complex; GO:0005737,cytoplasm; GO:0005634,nucleus; GO:0005886,plasma membrane; GO:0005509,calcium ion binding; GO:0004723,calcium-dependent protein serine/threonine phosphatase activity; GO:0019900,kinase binding; GO:0019722,calcium-mediated signaling; GO:0030007,cellular potassium ion homeostasis; GO:0005513,detection of calcium ion; GO:0042539,hypotonic salinity response;…
IFM89_019304	GO:0016020,membrane; GO:0005886,plasma membrane; GO:0005575,cellular_component; GO:0110165,cellular anatomical entity; GO:0071944,cell periphery
IFM89_015265	GO:0005794,Golgi apparatus; GO:0000139,Golgi membrane; GO:0016021,integral component of membrane; GO:0047259,glucomannan 4-beta-mannosyltransferase activity; GO:0016757,glycosyltransferase activity; GO:0051753,mannan synthase activity; GO:0071555,cell wall organization; GO:0009294,DNA-mediated transformation; GO:0009617,response to bacterium; GO:0000030,mannosyltransferase activity; GO:0003674,mo…
IFM89_003418	GO:0031225,anchored component of membrane; GO:0046658,anchored component of plasma membrane; GO:0005886,plasma membrane; GO:0005575,cellular_component; GO:0016020,membrane; GO:0031224,intrinsic component of membrane; GO:0110165,cellular anatomical entity; GO:0031226,intrinsic component of plasma membrane; GO:0071944,cell periphery
IFM89_016291	GO:0005737,cytoplasm; GO:0005524,ATP binding; GO:0046872,metal ion binding; GO:0004478,methionine adenosyltransferase activity; GO:0006730,one-carbon metabolic process; GO:0006556,S-adenosylmethionine biosynthetic process; GO:0000166,nucleotide binding; GO:0003674,molecular_function; GO:0005488,binding; GO:0017076,purine nucleotide binding; GO:0030554,adenyl nucleotide binding; GO:0032553,ribonuc…
IFM89_021324	GO:0005634,nucleus; GO:0005516,calmodulin binding; GO:0003700,DNA-binding transcription factor activity; GO:0000976,transcription cis-regulatory region binding; GO:0019760,glucosinolate metabolic process; GO:0003674,molecular_function; GO:0005488,binding; GO:0005515,protein binding; GO:0140110,transcription regulator activity; GO:0001067,transcription regulatory region nucleic acid binding; GO:00…
IFM89_025593	GO:0005737,cytoplasm; GO:0005829,cytosol; GO:0005634,nucleus; GO:0005886,plasma membrane; GO:0004001,adenosine kinase activity; GO:0005524,ATP binding; GO:0005507,copper ion binding; GO:0019900,kinase binding; GO:0006169,adenosine salvage; GO:0044209,AMP salvage; GO:0016310,phosphorylation; GO:0006144,purine nucleobase metabolic process; GO:0003674,molecular_function; GO:0003824,catalytic activit…
IFM89_001612	GO:0005737,cytoplasm; GO:0004022,alcohol dehydrogenase (NAD+) activity; GO:0008270,zinc ion binding; GO:0003674,molecular_function; GO:0003824,catalytic activity; GO:0016491,oxidoreductase activity; GO:0016614,oxidoreductase activity, acting on CH-OH group of donors; GO:0016616,oxidoreductase activity, acting on the CH-OH group of donors, NAD or NADP as acceptor; GO:0018455,alcohol dehydrogenase …
IFM89_029944	GO:0009507,chloroplast; GO:0009570,chloroplast stroma; GO:0047769,arogenate dehydratase activity; GO:0007623,circadian rhythm; GO:0009094,L-phenylalanine biosynthetic process; GO:0003674,molecular_function; GO:0003824,catalytic activity; GO:0016829,lyase activity; GO:0016835,carbon-oxygen lyase activity; GO:0016836,hydro-lyase activity; GO:0008150,biological_process; GO:0048511,rhythmic process; …
IFM89_009885	GO:0005634,nucleus; GO:0003729,mRNA binding; GO:0048024,regulation of mRNA splicing, via spliceosome; GO:0003674,molecular_function; GO:0003676,nucleic acid binding; GO:0003723,RNA binding; GO:0005488,binding; GO:0097159,organic cyclic compound binding; GO:1901363,heterocyclic compound binding; GO:0000375,RNA splicing, via transesterification reactions; GO:0000377,RNA splicing, via transesterific…
IFM89_033205	GO:0005737,cytoplasm; GO:0005634,nucleus; GO:0005524,ATP binding; GO:0036430,CMP kinase activity; GO:0004127,cytidylate kinase activity; GO:0036431,dCMP kinase activity; GO:0033862,UMP kinase activity; GO:0006207,'de novo' pyrimidine nucleobase biosynthetic process; GO:0046705,CDP biosynthetic process; GO:0016310,phosphorylation; GO:0006225,UDP biosynthetic process; GO:0000166,nucleotide binding;…
IFM89_001759	GO:0016021,integral component of membrane; GO:0046872,metal ion binding; GO:0016740,transferase activity; GO:0016567,protein ubiquitination; GO:0003674,molecular_function; GO:0005488,binding; GO:0043167,ion binding; GO:0043169,cation binding; GO:0003824,catalytic activity; GO:0006807,nitrogen compound metabolic process; GO:0008150,biological_process; GO:0008152,metabolic process; GO:0019538,prote…
IFM89_009415	GO:0047274,galactinol-sucrose galactosyltransferase activity; GO:0005975,carbohydrate metabolic process; GO:0003674,molecular_function; GO:0003824,catalytic activity; GO:0008378,galactosyltransferase activity; GO:0016740,transferase activity; GO:0016757,glycosyltransferase activity; GO:0016758,hexosyltransferase activity; GO:0008150,biological_process; GO:0008152,metabolic process; GO:0044238,pri…
IFM89_014811	GO:0005634,nucleus; GO:0003677,DNA binding; GO:0003700,DNA-binding transcription factor activity; GO:0046872,metal ion binding; GO:0045892,negative regulation of DNA-templated transcription; GO:0009733,response to auxin; GO:0009723,response to ethylene; GO:0009739,response to gibberellin; GO:0009744,response to sucrose; GO:0003674,molecular_function; GO:0003676,nucleic acid binding; GO:0005488,bi…
IFM89_035312	GO:0009507,chloroplast; GO:0009570,chloroplast stroma; GO:0005634,nucleus; GO:0009416,response to light stimulus; GO:0008150,biological_process; GO:0009314,response to radiation; GO:0009628,response to abiotic stimulus; GO:0050896,response to stimulus; GO:0005575,cellular_component; GO:0005622,intracellular anatomical structure; GO:0005737,cytoplasm; GO:0009536,plastid; GO:0043226,organelle; GO:0…
IFM89_021944	GO:0005739,mitochondrion; GO:0000175,3'-5'-exoribonuclease activity; GO:0016891,endoribonuclease activity, producing 5'-phosphomonoesters; GO:0046872,metal ion binding; GO:0003676,nucleic acid binding; GO:0000467,exonucleolytic trimming to generate mature 3'-end of 5.8S rRNA from tricistronic rRNA transcript (SSU-rRNA, 5.8S rRNA, LSU-rRNA); GO:0035194,post-transcriptional gene silencing by RNA; G…
IFM89_031850	GO:0005654,nucleoplasm; GO:0005634,nucleus; GO:0003677,DNA binding; GO:0009873,ethylene-activated signaling pathway; GO:0035066,positive regulation of histone acetylation; GO:0010468,regulation of gene expression; GO:0003674,molecular_function; GO:0003676,nucleic acid binding; GO:0005488,binding; GO:0097159,organic cyclic compound binding; GO:1901363,heterocyclic compound binding; GO:0000160,phos…
novel.6013	GO:0031225,anchored component of membrane; GO:0005886,plasma membrane; GO:0005575,cellular_component; GO:0016020,membrane; GO:0031224,intrinsic component of membrane; GO:0110165,cellular anatomical entity; GO:0071944,cell periphery
IFM89_023090	GO:0048046,apoplast; GO:0005783,endoplasmic reticulum; GO:0009506,plasmodesma; GO:0099503,secretory vesicle; GO:0005504,fatty acid binding; GO:0043621,protein self-association; GO:0008270,zinc ion binding; GO:0006869,lipid transport; GO:0009627,systemic acquired resistance; GO:0009862,systemic acquired resistance, salicylic acid mediated signaling pathway; GO:0003674,molecular_function; GO:000548…
IFM89_004892	GO:0016021,integral component of membrane; GO:0005886,plasma membrane; GO:0005524,ATP binding; GO:0004714,transmembrane receptor protein tyrosine kinase activity; GO:0006468,protein phosphorylation; GO:0000166,nucleotide binding; GO:0003674,molecular_function; GO:0005488,binding; GO:0017076,purine nucleotide binding; GO:0030554,adenyl nucleotide binding; GO:0032553,ribonucleotide binding; GO:0032…
IFM89_025158	GO:0009507,chloroplast; GO:0009534,chloroplast thylakoid; GO:0005886,plasma membrane; GO:0003849,3-deoxy-7-phosphoheptulonate synthase activity; GO:0009073,aromatic amino acid family biosynthetic process; GO:0008652,cellular amino acid biosynthetic process; GO:0009423,chorismate biosynthetic process; GO:0003674,molecular_function; GO:0003824,catalytic activity; GO:0016740,transferase activity; GO…
IFM89_021542	GO:0016021,integral component of membrane; GO:0006865,amino acid transport; GO:0019048,modulation by virus of host process; GO:0080143,regulation of amino acid export; GO:0009615,response to virus; GO:0032940,secretion by cell; GO:0006810,transport; GO:0008150,biological_process; GO:0015849,organic acid transport; GO:0051179,localization; GO:0051234,establishment of localization; GO:0071702,organ…
IFM89_036761	GO:0033809,anthocyanin 6''-O-malonyltransferase activity; GO:0102588,cyanidin 3-O-glucoside 6''-O-malonyltransferase activity; GO:0009698,phenylpropanoid metabolic process; GO:0003674,molecular_function; GO:0003824,catalytic activity; GO:0016740,transferase activity; GO:0016746,acyltransferase activity; GO:0016747,acyltransferase activity, transferring groups other than amino-acyl groups; GO:0006…
IFM89_011656	GO:0009570,chloroplast stroma; GO:0000287,magnesium ion binding; GO:0010333,terpene synthase activity; GO:0016102,diterpenoid biosynthetic process; GO:0033383,geranyl diphosphate metabolic process; GO:0043693,monoterpene biosynthetic process; GO:0003674,molecular_function; GO:0005488,binding; GO:0043167,ion binding; GO:0043169,cation binding; GO:0046872,metal ion binding; GO:0003824,catalytic act…
IFM89_031447	GO:0005737,cytoplasm; GO:0020037,heme binding; GO:0046872,metal ion binding; GO:0071456,cellular response to hypoxia; GO:0042742,defense response to bacterium; GO:0006979,response to oxidative stress; GO:0009751,response to salicylic acid; GO:0019441,tryptophan catabolic process to kynurenine; GO:0003674,molecular_function; GO:0005488,binding; GO:0046906,tetrapyrrole binding; GO:0097159,organic c…
IFM89_033035	GO:0005737,cytoplasm; GO:0030794,(S)-coclaurine-N-methyltransferase activity; GO:0032259,methylation; GO:0003674,molecular_function; GO:0003824,catalytic activity; GO:0008168,methyltransferase activity; GO:0008757,S-adenosylmethionine-dependent methyltransferase activity; GO:0016740,transferase activity; GO:0016741,transferase activity, transferring one-carbon groups; GO:0008150,biological_proces…
IFM89_013341	GO:0005886,plasma membrane; GO:0009506,plasmodesma; GO:0005524,ATP binding; GO:0106310,protein serine kinase activity; GO:0004674,protein serine/threonine kinase activity; GO:0009742,brassinosteroid mediated signaling pathway; GO:0006468,protein phosphorylation; GO:0009737,response to abscisic acid; GO:0009409,response to cold; GO:0009651,response to salt stress; GO:0000166,nucleotide binding; GO…
novel.8308	GO:0052689,carboxylic ester hydrolase activity; GO:0080030,methyl indole-3-acetate esterase activity; GO:0009860,pollen tube growth; GO:0003674,molecular_function; GO:0003824,catalytic activity; GO:0016787,hydrolase activity; GO:0016788,hydrolase activity, acting on ester bonds; GO:0000003,reproduction; GO:0000902,cell morphogenesis; GO:0000904,cell morphogenesis involved in differentiation; GO:0…
IFM89_019048	GO:0005794,Golgi apparatus; GO:0000139,Golgi membrane; GO:0016021,integral component of membrane; GO:0015020,glucuronosyltransferase activity; GO:0009826,unidimensional cell growth; GO:0003674,molecular_function; GO:0003824,catalytic activity; GO:0008194,UDP-glycosyltransferase activity; GO:0016740,transferase activity; GO:0016757,glycosyltransferase activity; GO:0016758,hexosyltransferase activi…
IFM89_031657	GO:0009986,cell surface; GO:0005737,cytoplasm; GO:0009898,cytoplasmic side of plasma membrane; GO:0005634,nucleus; GO:0000325,plant-type vacuole; GO:0005886,plasma membrane; GO:0005524,ATP binding; GO:0009882,blue light photoreceptor activity; GO:0010181,FMN binding; GO:0042802,identical protein binding; GO:0016301,kinase activity; GO:0003729,mRNA binding; GO:0004672,protein kinase activity; GO:0…
IFM89_002379	GO:0016021,integral component of membrane; GO:0020037,heme binding; GO:0005506,iron ion binding; GO:0004497,monooxygenase activity; GO:0016705,oxidoreductase activity, acting on paired donors, with incorporation or reduction of molecular oxygen; GO:0003674,molecular_function; GO:0005488,binding; GO:0046906,tetrapyrrole binding; GO:0097159,organic cyclic compound binding; GO:1901363,heterocyclic c…
IFM89_036209	GO:0005737,cytoplasm; GO:0031588,nucleotide-activated protein kinase complex; GO:0005634,nucleus; GO:0016208,AMP binding; GO:0019901,protein kinase binding; GO:0019887,protein kinase regulator activity; GO:0042149,cellular response to glucose starvation; GO:0071456,cellular response to hypoxia; GO:0006468,protein phosphorylation; GO:0050790,regulation of catalytic activity; GO:0000166,nucleotide …
IFM89_035333	GO:0016021,integral component of membrane; GO:0005575,cellular_component; GO:0016020,membrane; GO:0031224,intrinsic component of membrane; GO:0110165,cellular anatomical entity
IFM89_022579	GO:0004252,serine-type endopeptidase activity; GO:0008236,serine-type peptidase activity; GO:0006508,proteolysis; GO:0003674,molecular_function; GO:0003824,catalytic activity; GO:0004175,endopeptidase activity; GO:0008233,peptidase activity; GO:0016787,hydrolase activity; GO:0017171,serine hydrolase activity; GO:0140096,catalytic activity, acting on a protein; GO:0006807,nitrogen compound metabol…
IFM89_004060	GO:0012505,endomembrane system; GO:0005783,endoplasmic reticulum; GO:0016021,integral component of membrane; GO:0033011,perinuclear theca; GO:0009506,plasmodesma; GO:0008289,lipid binding; GO:0046872,metal ion binding; GO:0006869,lipid transport; GO:0003674,molecular_function; GO:0005488,binding; GO:0043167,ion binding; GO:0043169,cation binding; GO:0006810,transport; GO:0008150,biological_proces…
IFM89_034253	GO:0009507,chloroplast; GO:0009408,response to heat; GO:0006950,response to stress; GO:0008150,biological_process; GO:0009266,response to temperature stimulus; GO:0009628,response to abiotic stimulus; GO:0050896,response to stimulus; GO:0005575,cellular_component; GO:0005622,intracellular anatomical structure; GO:0005737,cytoplasm; GO:0009536,plastid; GO:0043226,organelle; GO:0043227,membrane-bou…
IFM89_024427	GO:0009507,chloroplast; GO:0009570,chloroplast stroma; GO:0009536,plastid; GO:0051538,3 iron, 4 sulfur cluster binding; GO:0050660,flavin adenine dinucleotide binding; GO:0010181,FMN binding; GO:0016040,glutamate synthase (NADH) activity; GO:0015930,glutamate synthase activity; GO:0005506,iron ion binding; GO:0016491,oxidoreductase activity; GO:0019676,ammonia assimilation cycle; GO:0048589,devel…
IFM89_003393	GO:0005737,cytoplasm; GO:0003983,UTP:glucose-1-phosphate uridylyltransferase activity; GO:0006011,UDP-glucose metabolic process; GO:0003674,molecular_function; GO:0003824,catalytic activity; GO:0016740,transferase activity; GO:0016772,transferase activity, transferring phosphorus-containing groups; GO:0016779,nucleotidyltransferase activity; GO:0051748,UTP-monosaccharide-1-phosphate uridylyltrans…
IFM89_017316	GO:0016021,integral component of membrane; GO:0009705,plant-type vacuole membrane; GO:0005886,plasma membrane; GO:0022821,solute:potassium antiporter activity; GO:0090333,regulation of stomatal closure; GO:0009624,response to nematode; GO:0010043,response to zinc ion; GO:0055069,zinc ion homeostasis; GO:0003674,molecular_function; GO:0005215,transporter activity; GO:0008324,cation transmembrane t…
IFM89_011821	GO:0016021,integral component of membrane; GO:0005635,nuclear envelope; GO:0031965,nuclear membrane; GO:0005634,nucleus; GO:0032797,SMN complex; GO:0003779,actin binding; GO:0007097,nuclear migration; GO:0000387,spliceosomal snRNP assembly; GO:0003674,molecular_function; GO:0005488,binding; GO:0005515,protein binding; GO:0008092,cytoskeletal protein binding; GO:0006810,transport; GO:0008150,biolo…
IFM89_012820	GO:0005737,cytoplasm; GO:0005634,nucleus; GO:0005886,plasma membrane; GO:0005524,ATP binding; GO:0005509,calcium ion binding; GO:0009931,calcium-dependent protein serine/threonine kinase activity; GO:0005516,calmodulin binding; GO:0004683,calmodulin-dependent protein kinase activity; GO:0106310,protein serine kinase activity; GO:0004674,protein serine/threonine kinase activity; GO:0035556,intrace…
IFM89_000357	GO:0031225,anchored component of membrane; GO:0005576,extracellular region; GO:0000325,plant-type vacuole; GO:0005575,cellular_component; GO:0016020,membrane; GO:0031224,intrinsic component of membrane; GO:0110165,cellular anatomical entity; GO:0005622,intracellular anatomical structure; GO:0005737,cytoplasm; GO:0005773,vacuole; GO:0043226,organelle; GO:0043227,membrane-bounded organelle; GO:0043…
IFM89_005782	GO:0005634,nucleus; GO:0003700,DNA-binding transcription factor activity; GO:0000981,DNA-binding transcription factor activity, RNA polymerase II-specific; GO:0000978,RNA polymerase II cis-regulatory region sequence-specific DNA binding; GO:0000976,transcription cis-regulatory region binding; GO:0006357,regulation of transcription by RNA polymerase II; GO:0003674,molecular_function; GO:0140110,tr…
IFM89_004837	GO:0009570,chloroplast stroma; GO:0003729,mRNA binding; GO:0000373,Group II intron splicing; GO:0006397,mRNA processing; GO:0006417,regulation of translation; GO:0003674,molecular_function; GO:0003676,nucleic acid binding; GO:0003723,RNA binding; GO:0005488,binding; GO:0097159,organic cyclic compound binding; GO:1901363,heterocyclic compound binding; GO:0000375,RNA splicing, via transesterificati…
IFM89_019587	GO:0005960,glycine cleavage complex; GO:0005739,mitochondrion; GO:0016594,glycine binding; GO:0004375,glycine dehydrogenase (decarboxylating) activity; GO:0030170,pyridoxal phosphate binding; GO:0019464,glycine decarboxylation via glycine cleavage system; GO:1901566,organonitrogen compound biosynthetic process; GO:0003674,molecular_function; GO:0005488,binding; GO:0016597,amino acid binding; GO:0…
IFM89_039117	GO:0016021,integral component of membrane; GO:0005575,cellular_component; GO:0016020,membrane; GO:0031224,intrinsic component of membrane; GO:0110165,cellular anatomical entity
IFM89_033387	GO:0005737,cytoplasm; GO:0005634,nucleus; GO:0051213,dioxygenase activity; GO:0046872,metal ion binding; GO:0003674,molecular_function; GO:0003824,catalytic activity; GO:0016491,oxidoreductase activity; GO:0005488,binding; GO:0043167,ion binding; GO:0043169,cation binding; GO:0005575,cellular_component; GO:0005622,intracellular anatomical structure; GO:0110165,cellular anatomical entity; GO:00432…
IFM89_035475	GO:0005739,mitochondrion; GO:0005634,nucleus; GO:0005524,ATP binding; GO:0106310,protein serine kinase activity; GO:0004674,protein serine/threonine kinase activity; GO:0004712,protein serine/threonine/tyrosine kinase activity; GO:0006468,protein phosphorylation; GO:0009651,response to salt stress; GO:0010182,sugar mediated signaling pathway; GO:0000166,nucleotide binding; GO:0003674,molecular_fu…
novel.5218	GO:0005576,extracellular region; GO:0005575,cellular_component; GO:0110165,cellular anatomical entity
IFM89_028666	GO:0005887,integral component of plasma membrane; GO:0051119,sugar transmembrane transporter activity; GO:0003674,molecular_function; GO:0005215,transporter activity; GO:0015144,carbohydrate transmembrane transporter activity; GO:0022857,transmembrane transporter activity; GO:0005575,cellular_component; GO:0005886,plasma membrane; GO:0016020,membrane; GO:0016021,integral component of membrane; GO…
IFM89_011075	GO:0030126,COPI vesicle coat; GO:0005783,endoplasmic reticulum; GO:0005793,endoplasmic reticulum-Golgi intermediate compartment; GO:0000139,Golgi membrane; GO:0005198,structural molecule activity; GO:0006888,endoplasmic reticulum to Golgi vesicle-mediated transport; GO:0006891,intra-Golgi vesicle-mediated transport; GO:0006886,intracellular protein transport; GO:0009306,protein secretion; GO:0003…
IFM89_036662	GO:0005887,integral component of plasma membrane; GO:0016020,membrane; GO:0035673,oligopeptide transmembrane transporter activity; GO:0015031,protein transport; GO:0003674,molecular_function; GO:0005215,transporter activity; GO:0022857,transmembrane transporter activity; GO:0042887,amide transmembrane transporter activity; GO:1904680,peptide transmembrane transporter activity; GO:0006810,transpor…
IFM89_000726	GO:0005874,microtubule; GO:0008017,microtubule binding; GO:0003674,molecular_function; GO:0005488,binding; GO:0005515,protein binding; GO:0008092,cytoskeletal protein binding; GO:0015631,tubulin binding; GO:0005575,cellular_component; GO:0005622,intracellular anatomical structure; GO:0005856,cytoskeleton; GO:0015630,microtubule cytoskeleton; GO:0043226,organelle; GO:0043228,non-membrane-bounded o…
IFM89_009579	GO:0009507,chloroplast; GO:0009536,plastid; GO:0106365,beta-carotene isomerase activity; GO:0005506,iron ion binding; GO:0010223,secondary shoot formation; GO:1901601,strigolactone biosynthetic process; GO:0003674,molecular_function; GO:0003824,catalytic activity; GO:0016853,isomerase activity; GO:0016859,cis-trans isomerase activity; GO:0005488,binding; GO:0043167,ion binding; GO:0043169,cation …
IFM89_023463	GO:0016021,integral component of membrane; GO:0016020,membrane; GO:0005886,plasma membrane; GO:0015079,potassium ion transmembrane transporter activity; GO:0006813,potassium ion transport; GO:0003674,molecular_function; GO:0005215,transporter activity; GO:0008324,cation transmembrane transporter activity; GO:0015075,ion transmembrane transporter activity; GO:0015318,inorganic molecular entity tra…
IFM89_030879	GO:0005789,endoplasmic reticulum membrane; GO:0016021,integral component of membrane; GO:0005886,plasma membrane; GO:0102966,arachidoyl-CoA:1-dodecanol O-acyltransferase activity; GO:0004144,diacylglycerol O-acyltransferase activity; GO:0047196,long-chain-alcohol O-fatty-acyltransferase activity; GO:0009737,response to abscisic acid; GO:0009651,response to salt stress; GO:0009414,response to wate…
IFM89_002338	GO:0005794,Golgi apparatus; GO:0005575,cellular_component; GO:0005622,intracellular anatomical structure; GO:0005737,cytoplasm; GO:0012505,endomembrane system; GO:0043226,organelle; GO:0043227,membrane-bounded organelle; GO:0043229,intracellular organelle; GO:0043231,intracellular membrane-bounded organelle; GO:0110165,cellular anatomical entity
IFM89_030221	GO:0046872,metal ion binding; GO:0003723,RNA binding; GO:0006952,defense response; GO:0003674,molecular_function; GO:0005488,binding; GO:0043167,ion binding; GO:0043169,cation binding; GO:0003676,nucleic acid binding; GO:0097159,organic cyclic compound binding; GO:1901363,heterocyclic compound binding; GO:0006950,response to stress; GO:0008150,biological_process; GO:0050896,response to stimulus
IFM89_017321	GO:0005768,endosome; GO:0005794,Golgi apparatus; GO:0016021,integral component of membrane; GO:0005886,plasma membrane; GO:0009506,plasmodesma; GO:0005802,trans-Golgi network; GO:0016760,cellulose synthase (UDP-forming) activity; GO:0016759,cellulose synthase activity; GO:0046872,metal ion binding; GO:0071555,cell wall organization; GO:0030244,cellulose biosynthetic process; GO:0006952,defense re…
IFM89_003041	GO:0005509,calcium ion binding; GO:0030234,enzyme regulator activity; GO:0019722,calcium-mediated signaling; GO:0003674,molecular_function; GO:0005488,binding; GO:0043167,ion binding; GO:0043169,cation binding; GO:0046872,metal ion binding; GO:0098772,molecular function regulator activity; GO:0007154,cell communication; GO:0007165,signal transduction; GO:0008150,biological_process; GO:0009987,cel…
IFM89_006579	GO:0005634,nucleus; GO:0006979,response to oxidative stress; GO:0006950,response to stress; GO:0008150,biological_process; GO:0050896,response to stimulus; GO:0005575,cellular_component; GO:0005622,intracellular anatomical structure; GO:0043226,organelle; GO:0043227,membrane-bounded organelle; GO:0043229,intracellular organelle; GO:0043231,intracellular membrane-bounded organelle; GO:0110165,cell…
IFM89_007728	GO:0016021,integral component of membrane; GO:0016020,membrane; GO:0035673,oligopeptide transmembrane transporter activity; GO:0003674,molecular_function; GO:0005215,transporter activity; GO:0022857,transmembrane transporter activity; GO:0042887,amide transmembrane transporter activity; GO:1904680,peptide transmembrane transporter activity; GO:0005575,cellular_component; GO:0031224,intrinsic comp…
IFM89_019471	GO:0005829,cytosol; GO:0005789,endoplasmic reticulum membrane; GO:0016021,integral component of membrane; GO:0031965,nuclear membrane; GO:0016607,nuclear speck; GO:0005634,nucleus; GO:0046872,metal ion binding; GO:0017018,myosin phosphatase activity; GO:0004722,protein serine/threonine phosphatase activity; GO:0003674,molecular_function; GO:0005488,binding; GO:0043167,ion binding; GO:0043169,cati…
IFM89_029645	GO:0005776,autophagosome; GO:0005737,cytoplasm; GO:0012505,endomembrane system; GO:0005771,multivesicular body; GO:0061630,ubiquitin protein ligase activity; GO:0008270,zinc ion binding; GO:0006511,ubiquitin-dependent protein catabolic process; GO:0003674,molecular_function; GO:0003824,catalytic activity; GO:0004842,ubiquitin-protein transferase activity; GO:0016740,transferase activity; GO:00197…
IFM89_029134	GO:0005829,cytosol; GO:0070300,phosphatidic acid binding; GO:0052866,phosphatidylinositol phosphate phosphatase activity; GO:0016314,phosphatidylinositol-3,4,5-trisphosphate 3-phosphatase activity; GO:0004725,protein tyrosine phosphatase activity; GO:0016311,dephosphorylation; GO:0035335,peptidyl-tyrosine dephosphorylation; GO:0046856,phosphatidylinositol dephosphorylation; GO:0006970,response to…
IFM89_037328	GO:0005634,nucleus; GO:0003677,DNA binding; GO:0003700,DNA-binding transcription factor activity; GO:0046872,metal ion binding; GO:0046982,protein heterodimerization activity; GO:0048653,anther development; GO:0009851,auxin biosynthetic process; GO:0009734,auxin-activated signaling pathway; GO:0009555,pollen development; GO:0045893,positive regulation of DNA-templated transcription; GO:0003674,mo…
IFM89_032749	GO:0005576,extracellular region; GO:0004252,serine-type endopeptidase activity; GO:0006508,proteolysis; GO:0003674,molecular_function; GO:0003824,catalytic activity; GO:0004175,endopeptidase activity; GO:0008233,peptidase activity; GO:0008236,serine-type peptidase activity; GO:0016787,hydrolase activity; GO:0017171,serine hydrolase activity; GO:0140096,catalytic activity, acting on a protein; GO:…
IFM89_019520	GO:0016746,acyltransferase activity; GO:0042617,paclitaxel biosynthetic process; GO:0003674,molecular_function; GO:0003824,catalytic activity; GO:0016740,transferase activity; GO:0006629,lipid metabolic process; GO:0006720,isoprenoid metabolic process; GO:0006721,terpenoid metabolic process; GO:0008150,biological_process; GO:0008152,metabolic process; GO:0008299,isoprenoid biosynthetic process; G…
novel.3463	GO:0016021,integral component of membrane; GO:0005575,cellular_component; GO:0016020,membrane; GO:0031224,intrinsic component of membrane; GO:0110165,cellular anatomical entity
IFM89_035969	GO:0016021,integral component of membrane; GO:0016020,membrane; GO:0140359,ABC-type transporter activity; GO:0005524,ATP binding; GO:0042626,ATPase-coupled transmembrane transporter activity; GO:1903825,organic acid transmembrane transport; GO:0009624,response to nematode; GO:0010345,suberin biosynthetic process; GO:0055085,transmembrane transport; GO:0003674,molecular_function; GO:0005215,transp…
IFM89_004265	GO:0005737,cytoplasm; GO:0005829,cytosol; GO:0005739,mitochondrion; GO:0005634,nucleus; GO:0005524,ATP binding; GO:0140662,ATP-dependent protein folding chaperone; GO:0006457,protein folding; GO:0009408,response to heat; GO:0000166,nucleotide binding; GO:0003674,molecular_function; GO:0005488,binding; GO:0017076,purine nucleotide binding; GO:0030554,adenyl nucleotide binding; GO:0032553,ribonucle…
IFM89_005983	GO:0000932,P-body; GO:0003729,mRNA binding; GO:0042803,protein homodimerization activity; GO:0071365,cellular response to auxin stimulus; GO:0031087,deadenylation-independent decapping of nuclear-transcribed mRNA; GO:0009965,leaf morphogenesis; GO:0006402,mRNA catabolic process; GO:0006397,mRNA processing; GO:0009791,post-embryonic development; GO:0010072,primary shoot apical meristem specificati…
IFM89_004157	GO:0016021,integral component of membrane; GO:0005886,plasma membrane; GO:0009506,plasmodesma; GO:0071916,dipeptide transmembrane transporter activity; GO:0042937,tripeptide transmembrane transporter activity; GO:0042938,dipeptide transport; GO:0006807,nitrogen compound metabolic process; GO:0015031,protein transport; GO:0042939,tripeptide transport; GO:0003674,molecular_function; GO:0005215,tran…
IFM89_038038	GO:0009501,amyloplast; GO:0009507,chloroplast; GO:0033201,alpha-1,4-glucan synthase activity; GO:0004373,glycogen (starch) synthase activity; GO:0009011,starch synthase activity; GO:0019252,starch biosynthetic process; GO:0005982,starch metabolic process; GO:0003674,molecular_function; GO:0003824,catalytic activity; GO:0016740,transferase activity; GO:0016757,glycosyltransferase activity; GO:0016…
IFM89_034893	GO:0005737,cytoplasm; GO:0005516,calmodulin binding; GO:0003755,peptidyl-prolyl cis-trans isomerase activity; GO:0061077,chaperone-mediated protein folding; GO:0000413,protein peptidyl-prolyl isomerization; GO:0003674,molecular_function; GO:0005488,binding; GO:0005515,protein binding; GO:0003824,catalytic activity; GO:0016853,isomerase activity; GO:0016859,cis-trans isomerase activity; GO:0140096…
IFM89_019562	GO:0016567,protein ubiquitination; GO:0006807,nitrogen compound metabolic process; GO:0008150,biological_process; GO:0008152,metabolic process; GO:0019538,protein metabolic process; GO:0032446,protein modification by small protein conjugation; GO:0036211,protein modification process; GO:0043170,macromolecule metabolic process; GO:0043412,macromolecule modification; GO:0044238,primary metabolic pr…
IFM89_030978	GO:0005737,cytoplasm; GO:0004459,L-lactate dehydrogenase activity; GO:0019752,carboxylic acid metabolic process; GO:0003674,molecular_function; GO:0003824,catalytic activity; GO:0004457,lactate dehydrogenase activity; GO:0016491,oxidoreductase activity; GO:0016614,oxidoreductase activity, acting on CH-OH group of donors; GO:0016616,oxidoreductase activity, acting on the CH-OH group of donors, NAD…
IFM89_005337	GO:0016021,integral component of membrane; GO:0005886,plasma membrane; GO:0005524,ATP binding; GO:0106310,protein serine kinase activity; GO:0004674,protein serine/threonine kinase activity; GO:0006468,protein phosphorylation; GO:0000166,nucleotide binding; GO:0003674,molecular_function; GO:0005488,binding; GO:0017076,purine nucleotide binding; GO:0030554,adenyl nucleotide binding; GO:0032553,rib…
IFM89_002696	GO:0033947,mannosylglycoprotein endo-beta-mannosidase activity; GO:0005975,carbohydrate metabolic process; GO:0003674,molecular_function; GO:0003824,catalytic activity; GO:0004553,hydrolase activity, hydrolyzing O-glycosyl compounds; GO:0004567,beta-mannosidase activity; GO:0015923,mannosidase activity; GO:0016787,hydrolase activity; GO:0016798,hydrolase activity, acting on glycosyl bonds; GO:000…
IFM89_018363	GO:0005783,endoplasmic reticulum; GO:0016020,membrane; GO:0000225,N-acetylglucosaminylphosphatidylinositol deacetylase activity; GO:0006506,GPI anchor biosynthetic process; GO:0003674,molecular_function; GO:0003824,catalytic activity; GO:0016787,hydrolase activity; GO:0016810,hydrolase activity, acting on carbon-nitrogen (but not peptide) bonds; GO:0016811,hydrolase activity, acting on carbon-nit…
IFM89_012574	GO:0005615,extracellular space; GO:0004867,serine-type endopeptidase inhibitor activity; GO:0003674,molecular_function; GO:0004857,enzyme inhibitor activity; GO:0004866,endopeptidase inhibitor activity; GO:0030234,enzyme regulator activity; GO:0030414,peptidase inhibitor activity; GO:0061134,peptidase regulator activity; GO:0061135,endopeptidase regulator activity; GO:0098772,molecular function r…
IFM89_022545	GO:0005634,nucleus; GO:0003677,DNA binding; GO:0003700,DNA-binding transcription factor activity; GO:0048830,adventitious root development; GO:0080037,negative regulation of cytokinin-activated signaling pathway; GO:0003674,molecular_function; GO:0003676,nucleic acid binding; GO:0005488,binding; GO:0097159,organic cyclic compound binding; GO:1901363,heterocyclic compound binding; GO:0140110,trans…
IFM89_009882	GO:0016021,integral component of membrane; GO:0005575,cellular_component; GO:0016020,membrane; GO:0031224,intrinsic component of membrane; GO:0110165,cellular anatomical entity
IFM89_034182	GO:0016021,integral component of membrane; GO:0005886,plasma membrane; GO:0005575,cellular_component; GO:0016020,membrane; GO:0031224,intrinsic component of membrane; GO:0110165,cellular anatomical entity; GO:0071944,cell periphery
IFM89_007780	GO:0016607,nuclear speck; GO:0005634,nucleus; GO:2000028,regulation of photoperiodism, flowering; GO:2000070,regulation of response to water deprivation; GO:0046686,response to cadmium ion; GO:0046688,response to copper ion; GO:0010218,response to far red light; GO:0009416,response to light stimulus; GO:0006979,response to oxidative stress; GO:0010114,response to red light; GO:0009611,response to…
IFM89_003481	GO:0005737,cytoplasm; GO:0045430,chalcone isomerase activity; GO:0009813,flavonoid biosynthetic process; GO:0003674,molecular_function; GO:0003824,catalytic activity; GO:0016853,isomerase activity; GO:0016872,intramolecular lyase activity; GO:0008150,biological_process; GO:0008152,metabolic process; GO:0009058,biosynthetic process; GO:0009812,flavonoid metabolic process; GO:0071704,organic substa…
IFM89_005691	GO:0005634,nucleus; GO:0003677,DNA binding; GO:0003700,DNA-binding transcription factor activity; GO:0042802,identical protein binding; GO:0046983,protein dimerization activity; GO:0000976,transcription cis-regulatory region binding; GO:0009704,de-etiolation; GO:0009740,gibberellic acid mediated signaling pathway; GO:0031539,positive regulation of anthocyanin metabolic process; GO:0010017,red or …
IFM89_004241	GO:0016021,integral component of membrane; GO:0005777,peroxisome; GO:0005886,plasma membrane; GO:0140359,ABC-type transporter activity; GO:0005524,ATP binding; GO:0080051,cutin transport; GO:0003674,molecular_function; GO:0005215,transporter activity; GO:0015399,primary active transmembrane transporter activity; GO:0022804,active transmembrane transporter activity; GO:0022857,transmembrane transp…
IFM89_005947	GO:0016787,hydrolase activity; GO:0046872,metal ion binding; GO:0003674,molecular_function; GO:0003824,catalytic activity; GO:0005488,binding; GO:0043167,ion binding; GO:0043169,cation binding
IFM89_012021	GO:0005739,mitochondrion; GO:0008774,acetaldehyde dehydrogenase (acetylating) activity; GO:0004029,aldehyde dehydrogenase (NAD+) activity; GO:0018479,benzaldehyde dehydrogenase (NAD+) activity; GO:0043878,glyceraldehyde-3-phosphate dehydrogenase (NAD+) (non-phosphorylating) activity; GO:0008957,phenylacetaldehyde dehydrogenase activity; GO:0007623,circadian rhythm; GO:0010597,green leaf volatile …
IFM89_029510	GO:0005739,mitochondrion; GO:0042709,succinate-CoA ligase complex; GO:0005524,ATP binding; GO:0000287,magnesium ion binding; GO:0004775,succinate-CoA ligase (ADP-forming) activity; GO:0006104,succinyl-CoA metabolic process; GO:0006099,tricarboxylic acid cycle; GO:0000166,nucleotide binding; GO:0003674,molecular_function; GO:0005488,binding; GO:0017076,purine nucleotide binding; GO:0030554,adenyl …
novel.4612	GO:0016810,hydrolase activity, acting on carbon-nitrogen (but not peptide) bonds; GO:0003674,molecular_function; GO:0003824,catalytic activity; GO:0016787,hydrolase activity
IFM89_035666	GO:0001181,RNA polymerase I general transcription initiation factor activity; GO:0006361,transcription initiation at RNA polymerase I promoter; GO:0003674,molecular_function; GO:0140223,general transcription initiation factor activity; GO:0006139,nucleobase-containing compound metabolic process; GO:0006351,DNA-templated transcription; GO:0006352,DNA-templated transcription initiation; GO:0006360,…
IFM89_026366	GO:0048046,apoplast; GO:0005794,Golgi apparatus; GO:0030247,polysaccharide binding; GO:0001708,cell fate specification; GO:0016998,cell wall macromolecule catabolic process; GO:0030244,cellulose biosynthetic process; GO:0006032,chitin catabolic process; GO:0009873,ethylene-activated signaling pathway; GO:0009825,multidimensional cell growth; GO:0010337,regulation of salicylic acid metabolic proce…
IFM89_007505	GO:0009507,chloroplast; GO:0005524,ATP binding; GO:0016851,magnesium chelatase activity; GO:0015995,chlorophyll biosynthetic process; GO:0015979,photosynthesis; GO:0000166,nucleotide binding; GO:0003674,molecular_function; GO:0005488,binding; GO:0017076,purine nucleotide binding; GO:0030554,adenyl nucleotide binding; GO:0032553,ribonucleotide binding; GO:0032555,purine ribonucleotide binding; GO:…
novel.8111	GO:0005634,nucleus; GO:0003700,DNA-binding transcription factor activity; GO:0000981,DNA-binding transcription factor activity, RNA polymerase II-specific; GO:0000976,transcription cis-regulatory region binding; GO:0009738,abscisic acid-activated signaling pathway; GO:0009737,response to abscisic acid; GO:0009735,response to cytokinin; GO:0009414,response to water deprivation; GO:0003674,molecula…
IFM89_030656	GO:0005654,nucleoplasm; GO:0070545,PeBoW complex; GO:0030687,preribosome, large subunit precursor; GO:0003729,mRNA binding; GO:0043021,ribonucleoprotein complex binding; GO:0003723,RNA binding; GO:0000466,maturation of 5.8S rRNA from tricistronic rRNA transcript (SSU-rRNA, 5.8S rRNA, LSU-rRNA); GO:0000463,maturation of LSU-rRNA from tricistronic rRNA transcript (SSU-rRNA, 5.8S rRNA, LSU-rRNA); GO…
IFM89_030236	GO:0016757,glycosyltransferase activity; GO:0005992,trehalose biosynthetic process; GO:0070413,trehalose metabolism in response to stress; GO:0003674,molecular_function; GO:0003824,catalytic activity; GO:0016740,transferase activity; GO:0005975,carbohydrate metabolic process; GO:0005984,disaccharide metabolic process; GO:0005991,trehalose metabolic process; GO:0008150,biological_process; GO:00081…
IFM89_022614	GO:0005576,extracellular region; GO:0050660,flavin adenine dinucleotide binding; GO:0046593,mandelonitrile lyase activity; GO:0016614,oxidoreductase activity, acting on CH-OH group of donors; GO:0007267,cell-cell signaling; GO:0009553,embryo sac development; GO:0010430,fatty acid omega-oxidation; GO:0000166,nucleotide binding; GO:0003674,molecular_function; GO:0005488,binding; GO:0036094,small mo…
novel.8410	GO:0005737,cytoplasm; GO:0005576,extracellular region; GO:0009505,plant-type cell wall; GO:0009506,plasmodesma; GO:0003993,acid phosphatase activity; GO:0046872,metal ion binding; GO:0016036,cellular response to phosphate starvation; GO:0003674,molecular_function; GO:0003824,catalytic activity; GO:0016787,hydrolase activity; GO:0016788,hydrolase activity, acting on ester bonds; GO:0016791,phospha…
IFM89_007703	GO:0000785,chromatin; GO:0000118,histone deacetylase complex; GO:0048188,Set1C/COMPASS complex; GO:0031490,chromatin DNA binding; GO:0032454,histone H3-methyl-lysine-9 demethylase activity; GO:0003712,transcription coregulator activity; GO:0033169,histone H3-K9 demethylation; GO:0006357,regulation of transcription by RNA polymerase II; GO:0003674,molecular_function; GO:0003676,nucleic acid bindin…
IFM89_030522	GO:0005634,nucleus; GO:0003700,DNA-binding transcription factor activity; GO:0042802,identical protein binding; GO:0000976,transcription cis-regulatory region binding; GO:0009734,auxin-activated signaling pathway; GO:0009793,embryo development ending in seed dormancy; GO:0009908,flower development; GO:0010305,leaf vascular tissue pattern formation; GO:0009942,longitudinal axis specification; GO:0…
novel.383	GO:0019146,arabinose-5-phosphate isomerase activity; GO:0005524,ATP binding; GO:1901135,carbohydrate derivative metabolic process; GO:0005975,carbohydrate metabolic process; GO:0003674,molecular_function; GO:0003824,catalytic activity; GO:0016853,isomerase activity; GO:0016860,intramolecular oxidoreductase activity; GO:0016861,intramolecular oxidoreductase activity, interconverting aldoses and ke…
IFM89_026598	GO:0009507,chloroplast; GO:0005524,ATP binding; GO:0140662,ATP-dependent protein folding chaperone; GO:0042026,protein refolding; GO:0000166,nucleotide binding; GO:0003674,molecular_function; GO:0005488,binding; GO:0017076,purine nucleotide binding; GO:0030554,adenyl nucleotide binding; GO:0032553,ribonucleotide binding; GO:0032555,purine ribonucleotide binding; GO:0032559,adenyl ribonucleotide b…
IFM89_005728	GO:0005576,extracellular region; GO:0009664,plant-type cell wall organization; GO:0008150,biological_process; GO:0009987,cellular process; GO:0016043,cellular component organization; GO:0045229,external encapsulating structure organization; GO:0071554,cell wall organization or biogenesis; GO:0071555,cell wall organization; GO:0071669,plant-type cell wall organization or biogenesis; GO:0071840,cel…
IFM89_017726	GO:0005576,extracellular region; GO:0020037,heme binding; GO:0046872,metal ion binding; GO:0004601,peroxidase activity; GO:0042744,hydrogen peroxide catabolic process; GO:0006979,response to oxidative stress; GO:0003674,molecular_function; GO:0005488,binding; GO:0046906,tetrapyrrole binding; GO:0097159,organic cyclic compound binding; GO:1901363,heterocyclic compound binding; GO:0043167,ion bindi…
IFM89_028777	GO:0030246,carbohydrate binding; GO:0032450,maltose alpha-glucosidase activity; GO:0003674,molecular_function; GO:0005488,binding; GO:0003824,catalytic activity; GO:0004553,hydrolase activity, hydrolyzing O-glycosyl compounds; GO:0004558,alpha-1,4-glucosidase activity; GO:0015926,glucosidase activity; GO:0016787,hydrolase activity; GO:0016798,hydrolase activity, acting on glycosyl bonds; GO:00905…
IFM89_029506	GO:0005737,cytoplasm; GO:0005789,endoplasmic reticulum membrane; GO:0005794,Golgi apparatus; GO:0000139,Golgi membrane; GO:0016021,integral component of membrane; GO:0005886,plasma membrane; GO:0005802,trans-Golgi network; GO:0000822,inositol hexakisphosphate binding; GO:0015114,phosphate ion transmembrane transporter activity; GO:0016036,cellular response to phosphate starvation; GO:0048016,inos…
IFM89_014413	GO:0005634,nucleus; GO:0003700,DNA-binding transcription factor activity; GO:0043565,sequence-specific DNA binding; GO:0042742,defense response to bacterium; GO:0050832,defense response to fungus; GO:0009867,jasmonic acid mediated signaling pathway; GO:0003674,molecular_function; GO:0140110,transcription regulator activity; GO:0003676,nucleic acid binding; GO:0003677,DNA binding; GO:0005488,bindi…
IFM89_018592	GO:0016020,membrane; GO:0046872,metal ion binding; GO:0004222,metalloendopeptidase activity; GO:0007155,cell adhesion; GO:0006508,proteolysis; GO:0003674,molecular_function; GO:0005488,binding; GO:0043167,ion binding; GO:0043169,cation binding; GO:0003824,catalytic activity; GO:0004175,endopeptidase activity; GO:0008233,peptidase activity; GO:0008237,metallopeptidase activity; GO:0016787,hydrolas…
novel.8287	GO:0005829,cytosol; GO:0004024,alcohol dehydrogenase activity, zinc-dependent; GO:0051903,S-(hydroxymethyl)glutathione dehydrogenase activity; GO:0008270,zinc ion binding; GO:0046294,formaldehyde catabolic process; GO:0003674,molecular_function; GO:0003824,catalytic activity; GO:0004022,alcohol dehydrogenase (NAD+) activity; GO:0016491,oxidoreductase activity; GO:0016614,oxidoreductase activity, …
IFM89_011833	GO:0005737,cytoplasm; GO:0005829,cytosol; GO:0005634,nucleus; GO:0003729,mRNA binding; GO:0061157,mRNA destabilization; GO:0003674,molecular_function; GO:0003676,nucleic acid binding; GO:0003723,RNA binding; GO:0005488,binding; GO:0097159,organic cyclic compound binding; GO:1901363,heterocyclic compound binding; GO:0006139,nucleobase-containing compound metabolic process; GO:0006401,RNA catabolic…
IFM89_001725	GO:0005737,cytoplasm; GO:0005768,endosome; GO:0005794,Golgi apparatus; GO:0005797,Golgi medial cisterna; GO:0000139,Golgi membrane; GO:0016021,integral component of membrane; GO:0009536,plastid; GO:0005802,trans-Golgi network; GO:0008168,methyltransferase activity; GO:0032259,methylation; GO:0003674,molecular_function; GO:0003824,catalytic activity; GO:0016740,transferase activity; GO:0016741,tra…
novel.3123	GO:0016021,integral component of membrane; GO:0005886,plasma membrane; GO:0140359,ABC-type transporter activity; GO:0005524,ATP binding; GO:0010597,green leaf volatile biosynthetic process; GO:0055085,transmembrane transport; GO:0003674,molecular_function; GO:0005215,transporter activity; GO:0015399,primary active transmembrane transporter activity; GO:0022804,active transmembrane transporter act…
IFM89_037098	GO:0047763,caffeate O-methyltransferase activity; GO:0046983,protein dimerization activity; GO:0009809,lignin biosynthetic process; GO:0032259,methylation; GO:0003674,molecular_function; GO:0003824,catalytic activity; GO:0008168,methyltransferase activity; GO:0008171,O-methyltransferase activity; GO:0016740,transferase activity; GO:0016741,transferase activity, transferring one-carbon groups; GO:…
IFM89_036511	GO:0016021,integral component of membrane; GO:0005886,plasma membrane; GO:0005575,cellular_component; GO:0016020,membrane; GO:0031224,intrinsic component of membrane; GO:0110165,cellular anatomical entity; GO:0071944,cell periphery
IFM89_003673	GO:0016021,integral component of membrane; GO:0005886,plasma membrane; GO:0005524,ATP binding; GO:0004672,protein kinase activity; GO:0006468,protein phosphorylation; GO:0000166,nucleotide binding; GO:0003674,molecular_function; GO:0005488,binding; GO:0017076,purine nucleotide binding; GO:0030554,adenyl nucleotide binding; GO:0032553,ribonucleotide binding; GO:0032555,purine ribonucleotide bindin…
IFM89_023121	GO:0030777,(S)-scoulerine 9-O-methyltransferase activity; GO:0008171,O-methyltransferase activity; GO:0046983,protein dimerization activity; GO:0009820,alkaloid metabolic process; GO:0032259,methylation; GO:0003674,molecular_function; GO:0003824,catalytic activity; GO:0008168,methyltransferase activity; GO:0008757,S-adenosylmethionine-dependent methyltransferase activity; GO:0016740,transferase a…
IFM89_034301	GO:0005829,cytosol; GO:0005739,mitochondrion; GO:0008783,agmatinase activity; GO:0004053,arginase activity; GO:0050897,cobalt ion binding; GO:0000287,magnesium ion binding; GO:0006527,arginine catabolic process; GO:0034214,protein hexamerization; GO:0033389,putrescine biosynthetic process from arginine, using agmatinase; GO:0000050,urea cycle; GO:0003674,molecular_function; GO:0003824,catalytic a…
IFM89_038321	GO:0005634,nucleus; GO:0003700,DNA-binding transcription factor activity; GO:0046983,protein dimerization activity; GO:0000976,transcription cis-regulatory region binding; GO:0019760,glucosinolate metabolic process; GO:0055072,iron ion homeostasis; GO:0006355,regulation of DNA-templated transcription; GO:0003674,molecular_function; GO:0140110,transcription regulator activity; GO:0005488,binding; …
IFM89_004300	GO:0005783,endoplasmic reticulum; GO:0005794,Golgi apparatus; GO:0000325,plant-type vacuole; GO:0009536,plastid; GO:0099503,secretory vesicle; GO:0046872,metal ion binding; GO:0009045,xylose isomerase activity; GO:0042843,D-xylose catabolic process; GO:0003674,molecular_function; GO:0005488,binding; GO:0043167,ion binding; GO:0043169,cation binding; GO:0003824,catalytic activity; GO:0016853,isome…
IFM89_016736	GO:0005886,plasma membrane; GO:0009904,chloroplast accumulation movement; GO:0042742,defense response to bacterium; GO:0016567,protein ubiquitination; GO:0006996,organelle organization; GO:0008150,biological_process; GO:0009657,plastid organization; GO:0009658,chloroplast organization; GO:0009902,chloroplast relocation; GO:0009987,cellular process; GO:0016043,cellular component organization; GO:0…
IFM89_032158	GO:0005737,cytoplasm; GO:0005634,nucleus; GO:0005575,cellular_component; GO:0005622,intracellular anatomical structure; GO:0110165,cellular anatomical entity; GO:0043226,organelle; GO:0043227,membrane-bounded organelle; GO:0043229,intracellular organelle; GO:0043231,intracellular membrane-bounded organelle
IFM89_025032	GO:1905202,methylcrotonoyl-CoA carboxylase complex; GO:0005759,mitochondrial matrix; GO:0005739,mitochondrion; GO:0005886,plasma membrane; GO:0005524,ATP binding; GO:0050897,cobalt ion binding; GO:0004485,methylcrotonoyl-CoA carboxylase activity; GO:0008270,zinc ion binding; GO:0006552,leucine catabolic process; GO:0000166,nucleotide binding; GO:0003674,molecular_function; GO:0005488,binding; GO:…
IFM89_018113	GO:0016021,integral component of membrane; GO:0038023,signaling receptor activity; GO:0009725,response to hormone; GO:0006979,response to oxidative stress; GO:0009744,response to sucrose; GO:0003674,molecular_function; GO:0060089,molecular transducer activity; GO:0008150,biological_process; GO:0009719,response to endogenous stimulus; GO:0010033,response to organic substance; GO:0042221,response t…
IFM89_024986	GO:0005737,cytoplasm; GO:0005829,cytosol; GO:0005769,early endosome; GO:0005783,endoplasmic reticulum; GO:0005768,endosome; GO:0005634,nucleus; GO:0005886,plasma membrane; GO:0005802,trans-Golgi network; GO:0012510,trans-Golgi network transport vesicle membrane; GO:0005524,ATP binding; GO:0016301,kinase activity; GO:0004709,MAP kinase kinase kinase activity; GO:0004672,protein kinase activity; GO…
IFM89_016607	GO:0031225,anchored component of membrane; GO:0005829,cytosol; GO:0005886,plasma membrane; GO:0008289,lipid binding; GO:0010150,leaf senescence; GO:0006869,lipid transport; GO:0080027,response to herbivore; GO:0009625,response to insect; GO:0003674,molecular_function; GO:0005488,binding; GO:0007275,multicellular organism development; GO:0008150,biological_process; GO:0032501,multicellular organis…
novel.8221	GO:0003677,DNA binding; GO:0046872,metal ion binding; GO:0003723,RNA binding; GO:0003674,molecular_function; GO:0003676,nucleic acid binding; GO:0005488,binding; GO:0097159,organic cyclic compound binding; GO:1901363,heterocyclic compound binding; GO:0043167,ion binding; GO:0043169,cation binding
IFM89_017489	GO:0005829,cytosol; GO:0046872,metal ion binding; GO:0061630,ubiquitin protein ligase activity; GO:0004842,ubiquitin-protein transferase activity; GO:0009789,positive regulation of abscisic acid-activated signaling pathway; GO:0016567,protein ubiquitination; GO:0009737,response to abscisic acid; GO:0009651,response to salt stress; GO:0006511,ubiquitin-dependent protein catabolic process; GO:00036…
IFM89_039733	GO:0016021,integral component of membrane; GO:0005634,nucleus; GO:0000325,plant-type vacuole; GO:0005886,plasma membrane; GO:0009506,plasmodesma; GO:0005524,ATP binding; GO:0042802,identical protein binding; GO:0004672,protein kinase activity; GO:0006468,protein phosphorylation; GO:0000166,nucleotide binding; GO:0003674,molecular_function; GO:0005488,binding; GO:0017076,purine nucleotide binding;…
IFM89_006153	GO:0009536,plastid; GO:0043539,protein serine/threonine kinase activator activity; GO:0035556,intracellular signal transduction; GO:0003674,molecular_function; GO:0008047,enzyme activator activity; GO:0019207,kinase regulator activity; GO:0019209,kinase activator activity; GO:0019887,protein kinase regulator activity; GO:0030234,enzyme regulator activity; GO:0030295,protein kinase activator activ…
IFM89_025225	GO:0009536,plastid; GO:0005840,ribosome; GO:0046872,metal ion binding; GO:0003735,structural constituent of ribosome; GO:0006412,translation; GO:0003674,molecular_function; GO:0005488,binding; GO:0043167,ion binding; GO:0043169,cation binding; GO:0005198,structural molecule activity; GO:0006518,peptide metabolic process; GO:0006807,nitrogen compound metabolic process; GO:0008150,biological_proces…
IFM89_036267	GO:0016021,integral component of membrane; GO:0005524,ATP binding; GO:0106310,protein serine kinase activity; GO:0004674,protein serine/threonine kinase activity; GO:0006468,protein phosphorylation; GO:0000166,nucleotide binding; GO:0003674,molecular_function; GO:0005488,binding; GO:0017076,purine nucleotide binding; GO:0030554,adenyl nucleotide binding; GO:0032553,ribonucleotide binding; GO:0032…
IFM89_001844	GO:0016021,integral component of membrane; GO:0005575,cellular_component; GO:0016020,membrane; GO:0031224,intrinsic component of membrane; GO:0110165,cellular anatomical entity
IFM89_007707	GO:0052659,inositol-1,3,4,5-tetrakisphosphate 5-phosphatase activity; GO:0052658,inositol-1,4,5-trisphosphate 5-phosphatase activity; GO:0004445,inositol-polyphosphate 5-phosphatase activity; GO:0046872,metal ion binding; GO:0004439,phosphatidylinositol-4,5-bisphosphate 5-phosphatase activity; GO:0046855,inositol phosphate dephosphorylation; GO:0046856,phosphatidylinositol dephosphorylation; GO:0…
novel.5879	GO:0005524,ATP binding; GO:0003678,DNA helicase activity; GO:0016787,hydrolase activity; GO:0006310,DNA recombination; GO:0006281,DNA repair; GO:0000723,telomere maintenance; GO:0000166,nucleotide binding; GO:0003674,molecular_function; GO:0005488,binding; GO:0017076,purine nucleotide binding; GO:0030554,adenyl nucleotide binding; GO:0032553,ribonucleotide binding; GO:0032555,purine ribonucleotid…
IFM89_018119	GO:0009941,chloroplast envelope; GO:0005737,cytoplasm; GO:0016881,acid-amino acid ligase activity; GO:0003674,molecular_function; GO:0003824,catalytic activity; GO:0016874,ligase activity; GO:0016879,ligase activity, forming carbon-nitrogen bonds; GO:0005575,cellular_component; GO:0005622,intracellular anatomical structure; GO:0009507,chloroplast; GO:0009526,plastid envelope; GO:0009536,plastid; …
IFM89_033851	GO:0005524,ATP binding; GO:0016887,ATP hydrolysis activity; GO:0003723,RNA binding; GO:0003724,RNA helicase activity; GO:0000166,nucleotide binding; GO:0003674,molecular_function; GO:0005488,binding; GO:0017076,purine nucleotide binding; GO:0030554,adenyl nucleotide binding; GO:0032553,ribonucleotide binding; GO:0032555,purine ribonucleotide binding; GO:0032559,adenyl ribonucleotide binding; GO:0…
IFM89_000781	GO:0005829,cytosol; GO:0016616,oxidoreductase activity, acting on the CH-OH group of donors, NAD or NADP as acceptor; GO:0003674,molecular_function; GO:0003824,catalytic activity; GO:0016491,oxidoreductase activity; GO:0016614,oxidoreductase activity, acting on CH-OH group of donors; GO:0005575,cellular_component; GO:0005622,intracellular anatomical structure; GO:0005737,cytoplasm; GO:0110165,cel…
IFM89_002009	GO:0036381,pyridoxal 5'-phosphate synthase (glutamine hydrolysing) activity; GO:0042823,pyridoxal phosphate biosynthetic process; GO:0003674,molecular_function; GO:0003824,catalytic activity; GO:0016829,lyase activity; GO:0016840,carbon-nitrogen lyase activity; GO:0016843,amine-lyase activity; GO:0006081,cellular aldehyde metabolic process; GO:0006725,cellular aromatic compound metabolic process;…
IFM89_023735	GO:0005634,nucleus; GO:0005524,ATP binding; GO:0004672,protein kinase activity; GO:0106310,protein serine kinase activity; GO:0004674,protein serine/threonine kinase activity; GO:0004712,protein serine/threonine/tyrosine kinase activity; GO:0004713,protein tyrosine kinase activity; GO:0006397,mRNA processing; GO:0046777,protein autophosphorylation; GO:0006468,protein phosphorylation; GO:0000166,n…
IFM89_033572	GO:0009507,chloroplast; GO:0009570,chloroplast stroma; GO:0008696,4-amino-4-deoxychorismate lyase activity; GO:0047810,D-alanine:2-oxoglutarate aminotransferase activity; GO:0019752,carboxylic acid metabolic process; GO:0008153,para-aminobenzoic acid biosynthetic process; GO:0046654,tetrahydrofolate biosynthetic process; GO:0003674,molecular_function; GO:0003824,catalytic activity; GO:0016829,lya…
novel.7006	GO:0016021,integral component of membrane; GO:0004378,GDP-Man:Man1GlcNAc2-PP-Dol alpha-1,3-mannosyltransferase activity; GO:0102704,GDP-Man:Man2GlcNAc2-PP-dolichol alpha-1,6-mannosyltransferase activity; GO:0006486,protein glycosylation; GO:0000030,mannosyltransferase activity; GO:0003674,molecular_function; GO:0003824,catalytic activity; GO:0004376,glycolipid mannosyltransferase activity; GO:001…
IFM89_028665	GO:0009507,chloroplast; GO:0009941,chloroplast envelope; GO:0016021,integral component of membrane; GO:0098717,pantothenate import across plasma membrane; GO:0006810,transport; GO:0006811,ion transport; GO:0006820,anion transport; GO:0008150,biological_process; GO:0009987,cellular process; GO:0015711,organic anion transport; GO:0015718,monocarboxylic acid transport; GO:0015887,pantothenate transm…
IFM89_035229	GO:0005737,cytoplasm; GO:0005643,nuclear pore; GO:0005654,nucleoplasm; GO:0046907,intracellular transport; GO:0051028,mRNA transport; GO:0015031,protein transport; GO:0050790,regulation of catalytic activity; GO:0006810,transport; GO:0008150,biological_process; GO:0009987,cellular process; GO:0051179,localization; GO:0051234,establishment of localization; GO:0051641,cellular localization; GO:0051…
IFM89_018410	GO:0004843,cysteine-type deubiquitinase activity; GO:1990380,Lys48-specific deubiquitinase activity; GO:0003674,molecular_function; GO:0003824,catalytic activity; GO:0008233,peptidase activity; GO:0008234,cysteine-type peptidase activity; GO:0016787,hydrolase activity; GO:0019783,ubiquitin-like protein peptidase activity; GO:0101005,deubiquitinase activity; GO:0140096,catalytic activity, acting o…
IFM89_022526	GO:0005794,Golgi apparatus; GO:0000139,Golgi membrane; GO:0016021,integral component of membrane; GO:0009506,plasmodesma; GO:0016757,glycosyltransferase activity; GO:0042803,protein homodimerization activity; GO:0071555,cell wall organization; GO:0099402,plant organ development; GO:0048868,pollen tube development; GO:0003674,molecular_function; GO:0003824,catalytic activity; GO:0016740,transferas…
IFM89_028875	GO:0016021,integral component of membrane; GO:0016020,membrane; GO:0005739,mitochondrion; GO:0000741,karyogamy; GO:0010197,polar nucleus fusion; GO:0009651,response to salt stress; GO:0006996,organelle organization; GO:0006997,nucleus organization; GO:0008150,biological_process; GO:0009987,cellular process; GO:0016043,cellular component organization; GO:0048284,organelle fusion; GO:0071840,cellul…
IFM89_017497	GO:0031225,anchored component of membrane; GO:0046658,anchored component of plasma membrane; GO:0009536,plastid; GO:0005575,cellular_component; GO:0016020,membrane; GO:0031224,intrinsic component of membrane; GO:0110165,cellular anatomical entity; GO:0005886,plasma membrane; GO:0031226,intrinsic component of plasma membrane; GO:0071944,cell periphery; GO:0005622,intracellular anatomical structure…
IFM89_034163	GO:0005874,microtubule; GO:0005524,ATP binding; GO:0016887,ATP hydrolysis activity; GO:0008017,microtubule binding; GO:0003777,microtubule motor activity; GO:0007018,microtubule-based movement; GO:0000166,nucleotide binding; GO:0003674,molecular_function; GO:0005488,binding; GO:0017076,purine nucleotide binding; GO:0030554,adenyl nucleotide binding; GO:0032553,ribonucleotide binding; GO:0032555,p…
novel.8621	GO:0005737,cytoplasm; GO:0016607,nuclear speck; GO:0005681,spliceosomal complex; GO:0003729,mRNA binding; GO:0003723,RNA binding; GO:0000398,mRNA splicing, via spliceosome; GO:0008380,RNA splicing; GO:0003674,molecular_function; GO:0003676,nucleic acid binding; GO:0005488,binding; GO:0097159,organic cyclic compound binding; GO:1901363,heterocyclic compound binding; GO:0000375,RNA splicing, via tr…
novel.8451	GO:0005199,structural constituent of cell wall; GO:0009664,plant-type cell wall organization; GO:0003674,molecular_function; GO:0005198,structural molecule activity; GO:0008150,biological_process; GO:0009987,cellular process; GO:0016043,cellular component organization; GO:0045229,external encapsulating structure organization; GO:0071554,cell wall organization or biogenesis; GO:0071555,cell wall o…
IFM89_025054	GO:0005737,cytoplasm; GO:0051213,dioxygenase activity; GO:0031418,L-ascorbic acid binding; GO:0046872,metal ion binding; GO:0003674,molecular_function; GO:0003824,catalytic activity; GO:0016491,oxidoreductase activity; GO:0005488,binding; GO:0019842,vitamin binding; GO:0030246,carbohydrate binding; GO:0031406,carboxylic acid binding; GO:0036094,small molecule binding; GO:0043167,ion binding; GO:0…
IFM89_005437	GO:0005829,cytosol; GO:0005634,nucleus; GO:0004843,cysteine-type deubiquitinase activity; GO:0004197,cysteine-type endopeptidase activity; GO:0016579,protein deubiquitination; GO:0006511,ubiquitin-dependent protein catabolic process; GO:0003674,molecular_function; GO:0003824,catalytic activity; GO:0008233,peptidase activity; GO:0008234,cysteine-type peptidase activity; GO:0016787,hydrolase activi…
IFM89_035986	GO:0009507,chloroplast; GO:0005524,ATP binding; GO:0016887,ATP hydrolysis activity; GO:0000166,nucleotide binding; GO:0003674,molecular_function; GO:0005488,binding; GO:0017076,purine nucleotide binding; GO:0030554,adenyl nucleotide binding; GO:0032553,ribonucleotide binding; GO:0032555,purine ribonucleotide binding; GO:0032559,adenyl ribonucleotide binding; GO:0035639,purine ribonucleoside triph…
IFM89_035515	GO:0005634,nucleus; GO:0003677,DNA binding; GO:0048262,determination of dorsal/ventral asymmetry; GO:0009908,flower development; GO:0003674,molecular_function; GO:0003676,nucleic acid binding; GO:0005488,binding; GO:0097159,organic cyclic compound binding; GO:1901363,heterocyclic compound binding; GO:0003002,regionalization; GO:0007275,multicellular organism development; GO:0007389,pattern specif…
novel.4814	GO:0048046,apoplast; GO:0005179,hormone activity; GO:0019722,calcium-mediated signaling; GO:0007267,cell-cell signaling; GO:0003674,molecular_function; GO:0005102,signaling receptor binding; GO:0005488,binding; GO:0005515,protein binding; GO:0030545,signaling receptor regulator activity; GO:0030546,signaling receptor activator activity; GO:0048018,receptor ligand activity; GO:0098772,molecular fu…
IFM89_037931	GO:0005576,extracellular region; GO:0009505,plant-type cell wall; GO:0020037,heme binding; GO:0046872,metal ion binding; GO:0004601,peroxidase activity; GO:0042744,hydrogen peroxide catabolic process; GO:0006979,response to oxidative stress; GO:0003674,molecular_function; GO:0005488,binding; GO:0046906,tetrapyrrole binding; GO:0097159,organic cyclic compound binding; GO:1901363,heterocyclic compo…
novel.8473	GO:0005634,nucleus; GO:0000981,DNA-binding transcription factor activity, RNA polymerase II-specific; GO:0046983,protein dimerization activity; GO:0000978,RNA polymerase II cis-regulatory region sequence-specific DNA binding; GO:0006357,regulation of transcription by RNA polymerase II; GO:0003674,molecular_function; GO:0003700,DNA-binding transcription factor activity; GO:0140110,transcription re…
IFM89_018202	GO:0005634,nucleus; GO:0003677,DNA binding; GO:0046872,metal ion binding; GO:0004518,nuclease activity; GO:0003723,RNA binding; GO:0003674,molecular_function; GO:0003676,nucleic acid binding; GO:0005488,binding; GO:0097159,organic cyclic compound binding; GO:1901363,heterocyclic compound binding; GO:0043167,ion binding; GO:0043169,cation binding; GO:0003824,catalytic activity; GO:0016787,hydrolas…
IFM89_010212	GO:0005634,nucleus; GO:0003682,chromatin binding; GO:0003886,DNA (cytosine-5-)-methyltransferase activity; GO:0003677,DNA binding; GO:0032776,DNA methylation on cytosine; GO:0010216,maintenance of DNA methylation; GO:0003674,molecular_function; GO:0005488,binding; GO:0003824,catalytic activity; GO:0008168,methyltransferase activity; GO:0008757,S-adenosylmethionine-dependent methyltransferase acti…
IFM89_031948	GO:0005634,nucleus; GO:0003677,DNA binding; GO:0003700,DNA-binding transcription factor activity; GO:0046983,protein dimerization activity; GO:0006355,regulation of DNA-templated transcription; GO:0003674,molecular_function; GO:0003676,nucleic acid binding; GO:0005488,binding; GO:0097159,organic cyclic compound binding; GO:1901363,heterocyclic compound binding; GO:0140110,transcription regulator …
IFM89_026276	GO:0005576,extracellular region; GO:0005886,plasma membrane; GO:0009536,plastid; GO:0009740,gibberellic acid mediated signaling pathway; GO:2000377,regulation of reactive oxygen species metabolic process; GO:0009737,response to abscisic acid; GO:0009739,response to gibberellin; GO:0009651,response to salt stress; GO:0007154,cell communication; GO:0007165,signal transduction; GO:0008150,biological…
IFM89_037480	GO:0005634,nucleus; GO:0016514,SWI/SNF complex; GO:0006325,chromatin organization; GO:0006281,DNA repair; GO:0009909,regulation of flower development; GO:0010468,regulation of gene expression; GO:2000024,regulation of leaf development; GO:0006357,regulation of transcription by RNA polymerase II; GO:0010224,response to UV-B; GO:0048364,root development; GO:0008150,biological_process; GO:0009987,ce…
IFM89_028156	GO:0005886,plasma membrane; GO:0005524,ATP binding; GO:0106310,protein serine kinase activity; GO:0004675,transmembrane receptor protein serine/threonine kinase activity; GO:0071395,cellular response to jasmonic acid stimulus; GO:0071446,cellular response to salicylic acid stimulus; GO:0042742,defense response to bacterium; GO:0002229,defense response to oomycetes; GO:0006468,protein phosphorylat…
IFM89_017070	GO:0005829,cytosol; GO:0052641,benzoic acid glucosyltransferase activity; GO:0090704,nicotinate-O-glucosyltransferase activity; GO:0080043,quercetin 3-O-glucosyltransferase activity; GO:0080044,quercetin 7-O-glucosyltransferase activity; GO:0052639,salicylic acid glucosyltransferase (ester-forming) activity; GO:0052640,salicylic acid glucosyltransferase (glucoside-forming) activity; GO:0080002,UD…
IFM89_011582	GO:0005634,nucleus; GO:0004843,cysteine-type deubiquitinase activity; GO:0004197,cysteine-type endopeptidase activity; GO:0016579,protein deubiquitination; GO:0048316,seed development; GO:0006511,ubiquitin-dependent protein catabolic process; GO:0003674,molecular_function; GO:0003824,catalytic activity; GO:0008233,peptidase activity; GO:0008234,cysteine-type peptidase activity; GO:0016787,hydrola…
IFM89_017305	GO:0009941,chloroplast envelope; GO:0031969,chloroplast membrane; GO:0009535,chloroplast thylakoid membrane; GO:0016021,integral component of membrane; GO:0097708,intracellular vesicle; GO:0005773,vacuole; GO:1904821,chloroplast disassembly; GO:0010150,leaf senescence; GO:0009735,response to cytokinin; GO:0006979,response to oxidative stress; GO:1902074,response to salt; GO:0009414,response to wa…
IFM89_012447	GO:0000786,nucleosome; GO:0005634,nucleus; GO:0003677,DNA binding; GO:0046982,protein heterodimerization activity; GO:0030527,structural constituent of chromatin; GO:0006334,nucleosome assembly; GO:0003674,molecular_function; GO:0003676,nucleic acid binding; GO:0005488,binding; GO:0097159,organic cyclic compound binding; GO:1901363,heterocyclic compound binding; GO:0005515,protein binding; GO:004…
IFM89_004788	GO:0051213,dioxygenase activity; GO:0046872,metal ion binding; GO:0003674,molecular_function; GO:0003824,catalytic activity; GO:0016491,oxidoreductase activity; GO:0005488,binding; GO:0043167,ion binding; GO:0043169,cation binding
IFM89_009825	GO:0071949,FAD binding; GO:0020037,heme binding; GO:0030151,molybdenum ion binding; GO:0043546,molybdopterin cofactor binding; GO:0009703,nitrate reductase (NADH) activity; GO:0050464,nitrate reductase (NADPH) activity; GO:0042128,nitrate assimilation; GO:0006809,nitric oxide biosynthetic process; GO:0000166,nucleotide binding; GO:0003674,molecular_function; GO:0005488,binding; GO:0036094,small m…
IFM89_020205	GO:0005829,cytosol; GO:0009536,plastid; GO:0005524,ATP binding; GO:0016773,phosphotransferase activity, alcohol group as acceptor; GO:0004856,xylulokinase activity; GO:0016117,carotenoid biosynthetic process; GO:0042732,D-xylose metabolic process; GO:0016310,phosphorylation; GO:0005997,xylulose metabolic process; GO:0000166,nucleotide binding; GO:0003674,molecular_function; GO:0005488,binding; GO…
IFM89_033850	GO:0005783,endoplasmic reticulum; GO:0030176,integral component of endoplasmic reticulum membrane; GO:0004168,dolichol kinase activity; GO:0043048,dolichyl monophosphate biosynthetic process; GO:0016310,phosphorylation; GO:0009555,pollen development; GO:0010483,pollen tube reception; GO:0006486,protein glycosylation; GO:0003674,molecular_function; GO:0003824,catalytic activity; GO:0016301,kinase …
novel.1660	GO:0009507,chloroplast; GO:0009570,chloroplast stroma; GO:0009536,plastid; GO:0102217,6-phosphoglucan, water dikinase activity; GO:0005524,ATP binding; GO:0019200,carbohydrate kinase activity; GO:0046872,metal ion binding; GO:0051752,phosphoglucan, water dikinase activity; GO:0102219,phosphogluco-amylopectin water dikinase activity; GO:2001070,starch binding; GO:0046777,protein autophosphorylatio…
IFM89_036794	GO:0005730,nucleolus; GO:0005654,nucleoplasm; GO:0008097,5S rRNA binding; GO:0000027,ribosomal large subunit assembly; GO:0006364,rRNA processing; GO:0003674,molecular_function; GO:0003676,nucleic acid binding; GO:0003723,RNA binding; GO:0005488,binding; GO:0019843,rRNA binding; GO:0097159,organic cyclic compound binding; GO:1901363,heterocyclic compound binding; GO:0006996,organelle organization…
IFM89_012474	GO:0016021,integral component of membrane; GO:0005886,plasma membrane; GO:0005524,ATP binding; GO:0106310,protein serine kinase activity; GO:0004674,protein serine/threonine kinase activity; GO:0006468,protein phosphorylation; GO:0000166,nucleotide binding; GO:0003674,molecular_function; GO:0005488,binding; GO:0017076,purine nucleotide binding; GO:0030554,adenyl nucleotide binding; GO:0032553,rib…
IFM89_023655	GO:0004867,serine-type endopeptidase inhibitor activity; GO:0009611,response to wounding; GO:0003674,molecular_function; GO:0004857,enzyme inhibitor activity; GO:0004866,endopeptidase inhibitor activity; GO:0030234,enzyme regulator activity; GO:0030414,peptidase inhibitor activity; GO:0061134,peptidase regulator activity; GO:0061135,endopeptidase regulator activity; GO:0098772,molecular function …
IFM89_011562	GO:0005737,cytoplasm; GO:0009514,glyoxysome; GO:0005634,nucleus; GO:0005777,peroxisome; GO:0005886,plasma membrane; GO:0004096,catalase activity; GO:0020037,heme binding; GO:0046872,metal ion binding; GO:0042744,hydrogen peroxide catabolic process; GO:0042542,response to hydrogen peroxide; GO:0009845,seed germination; GO:0003674,molecular_function; GO:0003824,catalytic activity; GO:0004601,peroxi…
IFM89_009651	GO:0048046,apoplast; GO:0009505,plant-type cell wall; GO:0000325,plant-type vacuole; GO:0099503,secretory vesicle; GO:0005773,vacuole; GO:0004557,alpha-galactosidase activity; GO:0052692,raffinose alpha-galactosidase activity; GO:0005975,carbohydrate metabolic process; GO:0071555,cell wall organization; GO:0003674,molecular_function; GO:0003824,catalytic activity; GO:0004553,hydrolase activity, h…
IFM89_039080	GO:0005947,mitochondrial alpha-ketoglutarate dehydrogenase complex; GO:0005739,mitochondrion; GO:0003863,3-methyl-2-oxobutanoate dehydrogenase (2-methylpropanoyl-transferring) activity; GO:0046872,metal ion binding; GO:0009083,branched-chain amino acid catabolic process; GO:0003674,molecular_function; GO:0003824,catalytic activity; GO:0016491,oxidoreductase activity; GO:0016624,oxidoreductase act…
IFM89_002765	GO:0005783,endoplasmic reticulum; GO:0005576,extracellular region; GO:0009505,plant-type cell wall; GO:0009506,plasmodesma; GO:0004185,serine-type carboxypeptidase activity; GO:0006508,proteolysis; GO:0003674,molecular_function; GO:0003824,catalytic activity; GO:0004180,carboxypeptidase activity; GO:0008233,peptidase activity; GO:0008236,serine-type peptidase activity; GO:0008238,exopeptidase act…
IFM89_019959	GO:0016021,integral component of membrane; GO:0005575,cellular_component; GO:0016020,membrane; GO:0031224,intrinsic component of membrane; GO:0110165,cellular anatomical entity
IFM89_012872	GO:0005829,cytosol; GO:0005524,ATP binding; GO:0106310,protein serine kinase activity; GO:0004674,protein serine/threonine kinase activity; GO:0004712,protein serine/threonine/tyrosine kinase activity; GO:0009658,chloroplast organization; GO:0006468,protein phosphorylation; GO:0000166,nucleotide binding; GO:0003674,molecular_function; GO:0005488,binding; GO:0017076,purine nucleotide binding; GO:0…
IFM89_023105	GO:0005634,nucleus; GO:0003700,DNA-binding transcription factor activity; GO:0046983,protein dimerization activity; GO:0000976,transcription cis-regulatory region binding; GO:0009742,brassinosteroid mediated signaling pathway; GO:0009740,gibberellic acid mediated signaling pathway; GO:0040008,regulation of growth; GO:0003674,molecular_function; GO:0140110,transcription regulator activity; GO:0005…
IFM89_036181	GO:0046658,anchored component of plasma membrane; GO:0009536,plastid; GO:0008081,phosphoric diester hydrolase activity; GO:0006629,lipid metabolic process; GO:0003674,molecular_function; GO:0003824,catalytic activity; GO:0016787,hydrolase activity; GO:0016788,hydrolase activity, acting on ester bonds; GO:0042578,phosphoric ester hydrolase activity; GO:0008150,biological_process; GO:0008152,metabo…
IFM89_018204	GO:0005737,cytoplasm; GO:0005886,plasma membrane; GO:0005524,ATP binding; GO:0016787,hydrolase activity; GO:0004674,protein serine/threonine kinase activity; GO:0004714,transmembrane receptor protein tyrosine kinase activity; GO:0009740,gibberellic acid mediated signaling pathway; GO:0010476,gibberellin mediated signaling pathway; GO:0051781,positive regulation of cell division; GO:0006468,protei…
novel.4504	GO:0005524,ATP binding; GO:0106310,protein serine kinase activity; GO:0004674,protein serine/threonine kinase activity; GO:0006468,protein phosphorylation; GO:0000166,nucleotide binding; GO:0003674,molecular_function; GO:0005488,binding; GO:0017076,purine nucleotide binding; GO:0030554,adenyl nucleotide binding; GO:0032553,ribonucleotide binding; GO:0032555,purine ribonucleotide binding; GO:00325…
novel.4732	GO:0005739,mitochondrion; GO:0005575,cellular_component; GO:0005622,intracellular anatomical structure; GO:0005737,cytoplasm; GO:0043226,organelle; GO:0043227,membrane-bounded organelle; GO:0043229,intracellular organelle; GO:0043231,intracellular membrane-bounded organelle; GO:0110165,cellular anatomical entity
IFM89_033176	GO:0005737,cytoplasm; GO:0005634,nucleus; GO:0003676,nucleic acid binding; GO:0008270,zinc ion binding; GO:0003674,molecular_function; GO:0005488,binding; GO:0097159,organic cyclic compound binding; GO:1901363,heterocyclic compound binding; GO:0043167,ion binding; GO:0043169,cation binding; GO:0046872,metal ion binding; GO:0046914,transition metal ion binding; GO:0005575,cellular_component; GO:00…
IFM89_009098	GO:0010369,chromocenter; GO:0005634,nucleus; GO:0003682,chromatin binding; GO:0010385,double-stranded methylated DNA binding; GO:0042393,histone binding; GO:0046872,metal ion binding; GO:0008327,methyl-CpG binding; GO:0010428,methyl-CpNpG binding; GO:0010429,methyl-CpNpN binding; GO:0061630,ubiquitin protein ligase activity; GO:0004842,ubiquitin-protein transferase activity; GO:0051301,cell divis…
IFM89_038891	GO:0005634,nucleus; GO:0003700,DNA-binding transcription factor activity; GO:0000976,transcription cis-regulatory region binding; GO:0008270,zinc ion binding; GO:0030154,cell differentiation; GO:0007623,circadian rhythm; GO:0003674,molecular_function; GO:0140110,transcription regulator activity; GO:0001067,transcription regulatory region nucleic acid binding; GO:0003676,nucleic acid binding; GO:0…
IFM89_034550	GO:0016021,integral component of membrane; GO:0005886,plasma membrane; GO:0005524,ATP binding; GO:0016887,ATP hydrolysis activity; GO:0046872,metal ion binding; GO:0003729,mRNA binding; GO:0015662,P-type ion transporter activity; GO:0008553,P-type proton-exporting transporter activity; GO:0034220,ion transmembrane transport; GO:0120029,proton export across plasma membrane; GO:1902600,proton trans…
IFM89_008774	GO:0005743,mitochondrial inner membrane; GO:0005758,mitochondrial intermembrane space; GO:0005739,mitochondrion; GO:0005777,peroxisome; GO:0005509,calcium ion binding; GO:0050136,NADH dehydrogenase (quinone) activity; GO:0016491,oxidoreductase activity; GO:0006116,NADH oxidation; GO:0003674,molecular_function; GO:0005488,binding; GO:0043167,ion binding; GO:0043169,cation binding; GO:0046872,metal…
IFM89_028517	GO:0005634,nucleus; GO:0005886,plasma membrane; GO:0042802,identical protein binding; GO:0042742,defense response to bacterium; GO:0009908,flower development; GO:0009867,jasmonic acid mediated signaling pathway; GO:0009555,pollen development; GO:1900067,regulation of cellular response to alkaline pH; GO:0031347,regulation of defense response; GO:2000022,regulation of jasmonic acid mediated signal…
IFM89_032562	GO:0016021,integral component of membrane; GO:0005886,plasma membrane; GO:0005774,vacuolar membrane; GO:0005509,calcium ion binding; GO:0015369,calcium:proton antiporter activity; GO:0070588,calcium ion transmembrane transport; GO:0006874,cellular calcium ion homeostasis; GO:0006814,sodium ion transport; GO:0003674,molecular_function; GO:0005488,binding; GO:0043167,ion binding; GO:0043169,cation …
IFM89_022657	GO:0008017,microtubule binding; GO:0003674,molecular_function; GO:0005488,binding; GO:0005515,protein binding; GO:0008092,cytoskeletal protein binding; GO:0015631,tubulin binding
IFM89_034856	GO:0005737,cytoplasm; GO:0005634,nucleus; GO:0000325,plant-type vacuole; GO:0009536,plastid; GO:0005516,calmodulin binding; GO:0003755,peptidyl-prolyl cis-trans isomerase activity; GO:0070370,cellular heat acclimation; GO:0061077,chaperone-mediated protein folding; GO:0000413,protein peptidyl-prolyl isomerization; GO:0003674,molecular_function; GO:0005488,binding; GO:0005515,protein binding; GO:0…
novel.4723	GO:0005829,cytosol; GO:0005634,nucleus; GO:0005886,plasma membrane; GO:1902265,abscisic acid homeostasis; GO:0009738,abscisic acid-activated signaling pathway; GO:0030048,actin filament-based movement; GO:0009903,chloroplast avoidance movement; GO:0009902,chloroplast relocation; GO:0031022,nuclear migration along microfilament; GO:0009787,regulation of abscisic acid-activated signaling pathway; G…
IFM89_010509	GO:0051213,dioxygenase activity; GO:0046872,metal ion binding; GO:0003674,molecular_function; GO:0003824,catalytic activity; GO:0016491,oxidoreductase activity; GO:0005488,binding; GO:0043167,ion binding; GO:0043169,cation binding
IFM89_035910	GO:0000139,Golgi membrane; GO:0016021,integral component of membrane; GO:0005886,plasma membrane; GO:0016760,cellulose synthase (UDP-forming) activity; GO:0051753,mannan synthase activity; GO:0071555,cell wall organization; GO:0030244,cellulose biosynthetic process; GO:0009833,plant-type primary cell wall biogenesis; GO:0003674,molecular_function; GO:0003824,catalytic activity; GO:0008194,UDP-gly…
IFM89_007697	GO:0005737,cytoplasm; GO:0046872,metal ion binding; GO:0061630,ubiquitin protein ligase activity; GO:0004842,ubiquitin-protein transferase activity; GO:0016567,protein ubiquitination; GO:0090378,seed trichome elongation; GO:0003674,molecular_function; GO:0005488,binding; GO:0043167,ion binding; GO:0043169,cation binding; GO:0003824,catalytic activity; GO:0016740,transferase activity; GO:0019787,u…
IFM89_008469	GO:0005886,plasma membrane; GO:0009506,plasmodesma; GO:0019210,kinase inhibitor activity; GO:0003674,molecular_function; GO:0004857,enzyme inhibitor activity; GO:0019207,kinase regulator activity; GO:0030234,enzyme regulator activity; GO:0098772,molecular function regulator activity; GO:0005575,cellular_component; GO:0016020,membrane; GO:0071944,cell periphery; GO:0110165,cellular anatomical enti…
IFM89_013281	GO:0016616,oxidoreductase activity, acting on the CH-OH group of donors, NAD or NADP as acceptor; GO:1901869,ecgonine methyl ester biosynthetic process; GO:1901868,ecgonine methyl ester catabolic process; GO:1901872,ecgonone methyl ester biosynthetic process; GO:1901871,ecgonone methyl ester catabolic process; GO:0003674,molecular_function; GO:0003824,catalytic activity; GO:0016491,oxidoreductase…
IFM89_018685	GO:0048046,apoplast; GO:0004553,hydrolase activity, hydrolyzing O-glycosyl compounds; GO:0016762,xyloglucan:xyloglucosyl transferase activity; GO:0042546,cell wall biogenesis; GO:0071555,cell wall organization; GO:0009835,fruit ripening; GO:0010411,xyloglucan metabolic process; GO:0003674,molecular_function; GO:0003824,catalytic activity; GO:0016787,hydrolase activity; GO:0016798,hydrolase activi…
IFM89_007465	GO:0016021,integral component of membrane; GO:0009705,plant-type vacuole membrane; GO:0005886,plasma membrane; GO:0015112,nitrate transmembrane transporter activity; GO:0071249,cellular response to nitrate; GO:0042128,nitrate assimilation; GO:0015706,nitrate transmembrane transport; GO:0003674,molecular_function; GO:0005215,transporter activity; GO:0008509,anion transmembrane transporter activity…
IFM89_016650	GO:0009691,cytokinin biosynthetic process; GO:0009736,cytokinin-activated signaling pathway; GO:0006725,cellular aromatic compound metabolic process; GO:0006807,nitrogen compound metabolic process; GO:0008150,biological_process; GO:0008152,metabolic process; GO:0009058,biosynthetic process; GO:0009308,amine metabolic process; GO:0009690,cytokinin metabolic process; GO:0009987,cellular process; GO…
IFM89_030901	GO:0005634,nucleus; GO:0035102,PRC1 complex; GO:0046872,metal ion binding; GO:0016740,transferase activity; GO:0001709,cell fate determination; GO:0010076,maintenance of floral meristem identity; GO:0010077,maintenance of inflorescence meristem identity; GO:0010492,maintenance of shoot apical meristem identity; GO:0045814,negative regulation of gene expression, epigenetic; GO:0045892,negative reg…
IFM89_010977	GO:0012505,endomembrane system; GO:0016021,integral component of membrane; GO:0003841,1-acylglycerol-3-phosphate O-acyltransferase activity; GO:0016746,acyltransferase activity; GO:0016024,CDP-diacylglycerol biosynthetic process; GO:0003674,molecular_function; GO:0003824,catalytic activity; GO:0008374,O-acyltransferase activity; GO:0016411,acylglycerol O-acyltransferase activity; GO:0016740,trans…
IFM89_012099	GO:0005737,cytoplasm; GO:0005634,nucleus; GO:0003713,transcription coactivator activity; GO:0008283,cell population proliferation; GO:0048366,leaf development; GO:0045944,positive regulation of transcription by RNA polymerase II; GO:0045893,positive regulation of DNA-templated transcription; GO:0048316,seed development; GO:0003674,molecular_function; GO:0003712,transcription coregulator activity;…
IFM89_004283	GO:0005829,cytosol; GO:0005739,mitochondrion; GO:0005524,ATP binding; GO:0004370,glycerol kinase activity; GO:0016773,phosphotransferase activity, alcohol group as acceptor; GO:0042742,defense response to bacterium; GO:0019563,glycerol catabolic process; GO:0006071,glycerol metabolic process; GO:0046167,glycerol-3-phosphate biosynthetic process; GO:0016310,phosphorylation; GO:0009617,response to …
IFM89_029829	GO:0016021,integral component of membrane; GO:0046872,metal ion binding; GO:0052631,sphingolipid delta-8 desaturase activity; GO:0006665,sphingolipid metabolic process; GO:0003674,molecular_function; GO:0005488,binding; GO:0043167,ion binding; GO:0043169,cation binding; GO:0003824,catalytic activity; GO:0016491,oxidoreductase activity; GO:0016705,oxidoreductase activity, acting on paired donors, …
IFM89_027405	GO:0016021,integral component of membrane; GO:0015185,gamma-aminobutyric acid transmembrane transporter activity; GO:0015180,L-alanine transmembrane transporter activity; GO:0005313,L-glutamate transmembrane transporter activity; GO:0015189,L-lysine transmembrane transporter activity; GO:0015812,gamma-aminobutyric acid transport; GO:0003674,molecular_function; GO:0005215,transporter activity; GO:…
IFM89_002928	GO:0009507,chloroplast; GO:0009941,chloroplast envelope; GO:0009570,chloroplast stroma; GO:0098807,chloroplast thylakoid membrane protein complex; GO:0005829,cytosol; GO:0007623,circadian rhythm; GO:0008150,biological_process; GO:0048511,rhythmic process; GO:0005575,cellular_component; GO:0005622,intracellular anatomical structure; GO:0005737,cytoplasm; GO:0009536,plastid; GO:0043226,organelle; G…
novel.1345	GO:0005634,nucleus; GO:0008270,zinc ion binding; GO:0006355,regulation of DNA-templated transcription; GO:0003674,molecular_function; GO:0005488,binding; GO:0043167,ion binding; GO:0043169,cation binding; GO:0046872,metal ion binding; GO:0046914,transition metal ion binding; GO:0006139,nucleobase-containing compound metabolic process; GO:0006351,DNA-templated transcription; GO:0006725,cellular ar…
IFM89_015613	GO:0005634,nucleus; GO:0003700,DNA-binding transcription factor activity; GO:0000976,transcription cis-regulatory region binding; GO:0080060,integument development; GO:0045995,regulation of embryonic development; GO:0009753,response to jasmonic acid; GO:0048317,seed morphogenesis; GO:0048731,system development; GO:0003674,molecular_function; GO:0140110,transcription regulator activity; GO:0001067…
IFM89_021347	GO:0016021,integral component of membrane; GO:0008061,chitin binding; GO:0005975,carbohydrate metabolic process; GO:0003674,molecular_function; GO:0005488,binding; GO:0097367,carbohydrate derivative binding; GO:0008150,biological_process; GO:0008152,metabolic process; GO:0044238,primary metabolic process; GO:0071704,organic substance metabolic process; GO:0005575,cellular_component; GO:0016020,me…
IFM89_017856	GO:0016021,integral component of membrane; GO:0005886,plasma membrane; GO:0005575,cellular_component; GO:0016020,membrane; GO:0031224,intrinsic component of membrane; GO:0110165,cellular anatomical entity; GO:0071944,cell periphery
IFM89_033550	GO:0005737,cytoplasm; GO:0005634,nucleus; GO:0000325,plant-type vacuole; GO:0009506,plasmodesma; GO:0005524,ATP binding; GO:0019900,kinase binding; GO:0106310,protein serine kinase activity; GO:0004674,protein serine/threonine kinase activity; GO:0006468,protein phosphorylation; GO:0009737,response to abscisic acid; GO:0009409,response to cold; GO:0009749,response to glucose; GO:0009408,response …
IFM89_028147	GO:0005634,nucleus; GO:0090406,pollen tube; GO:0003700,DNA-binding transcription factor activity; GO:0000400,four-way junction DNA binding; GO:0000976,transcription cis-regulatory region binding; GO:0019760,glucosinolate metabolic process; GO:0009846,pollen germination; GO:0009860,pollen tube growth; GO:0006355,regulation of DNA-templated transcription; GO:0003674,molecular_function; GO:0140110,t…
IFM89_034405	GO:0009570,chloroplast stroma; GO:0004106,chorismate mutase activity; GO:0009073,aromatic amino acid family biosynthetic process; GO:0008652,cellular amino acid biosynthetic process; GO:0046417,chorismate metabolic process; GO:0010597,green leaf volatile biosynthetic process; GO:0003674,molecular_function; GO:0003824,catalytic activity; GO:0016853,isomerase activity; GO:0016866,intramolecular tra…
IFM89_037048	GO:0005634,nucleus; GO:0000325,plant-type vacuole; GO:1990904,ribonucleoprotein complex; GO:0005524,ATP binding; GO:0016887,ATP hydrolysis activity; GO:0003723,RNA binding; GO:0003724,RNA helicase activity; GO:0000184,nuclear-transcribed mRNA catabolic process, nonsense-mediated decay; GO:0006364,rRNA processing; GO:0000166,nucleotide binding; GO:0003674,molecular_function; GO:0005488,binding; GO…
IFM89_014139	GO:0005737,cytoplasm; GO:0005829,cytosol; GO:0005634,nucleus; GO:0050660,flavin adenine dinucleotide binding; GO:0010181,FMN binding; GO:0050661,NADP binding; GO:0003958,NADPH-hemoprotein reductase activity; GO:0016491,oxidoreductase activity; GO:0016651,oxidoreductase activity, acting on NAD(P)H; GO:0009793,embryo development ending in seed dormancy; GO:0016226,iron-sulfur cluster assembly; GO:0…
IFM89_006647	GO:0005829,cytosol; GO:0005524,ATP binding; GO:0016405,CoA-ligase activity; GO:0000166,nucleotide binding; GO:0003674,molecular_function; GO:0005488,binding; GO:0017076,purine nucleotide binding; GO:0030554,adenyl nucleotide binding; GO:0032553,ribonucleotide binding; GO:0032555,purine ribonucleotide binding; GO:0032559,adenyl ribonucleotide binding; GO:0035639,purine ribonucleoside triphosphate …
IFM89_020252	GO:0005634,nucleus; GO:0003677,DNA binding; GO:0003700,DNA-binding transcription factor activity; GO:0000976,transcription cis-regulatory region binding; GO:0030154,cell differentiation; GO:0051301,cell division; GO:0009908,flower development; GO:0019760,glucosinolate metabolic process; GO:0010492,maintenance of shoot apical meristem identity; GO:0010601,positive regulation of auxin biosynthetic …
IFM89_036195	GO:0042409,caffeoyl-CoA O-methyltransferase activity; GO:0046872,metal ion binding; GO:0008757,S-adenosylmethionine-dependent methyltransferase activity; GO:0009809,lignin biosynthetic process; GO:0032259,methylation; GO:0003674,molecular_function; GO:0003824,catalytic activity; GO:0008168,methyltransferase activity; GO:0008171,O-methyltransferase activity; GO:0016740,transferase activity; GO:001…
IFM89_017727	GO:0005576,extracellular region; GO:0000325,plant-type vacuole; GO:0020037,heme binding; GO:0046872,metal ion binding; GO:0004601,peroxidase activity; GO:0042744,hydrogen peroxide catabolic process; GO:0006979,response to oxidative stress; GO:0003674,molecular_function; GO:0005488,binding; GO:0046906,tetrapyrrole binding; GO:0097159,organic cyclic compound binding; GO:1901363,heterocyclic compoun…
novel.8480	GO:0000785,chromatin; GO:0005737,cytoplasm; GO:0005634,nucleus; GO:0048471,perinuclear region of cytoplasm; GO:0005886,plasma membrane; GO:0048188,Set1C/COMPASS complex; GO:0003682,chromatin binding; GO:0018024,histone-lysine N-methyltransferase activity; GO:0046872,metal ion binding; GO:0010314,phosphatidylinositol-5-phosphate binding; GO:0008276,protein methyltransferase activity; GO:0000976,tr…
IFM89_038214	GO:0016021,integral component of membrane; GO:0020037,heme binding; GO:0005506,iron ion binding; GO:0004497,monooxygenase activity; GO:0016705,oxidoreductase activity, acting on paired donors, with incorporation or reduction of molecular oxygen; GO:0009926,auxin polar transport; GO:0016117,carotenoid biosynthetic process; GO:0009963,positive regulation of flavonoid biosynthetic process; GO:000993…
IFM89_016469	GO:0005794,Golgi apparatus; GO:0016021,integral component of membrane; GO:0016413,O-acetyltransferase activity; GO:0003674,molecular_function; GO:0003824,catalytic activity; GO:0008374,O-acyltransferase activity; GO:0016407,acetyltransferase activity; GO:0016740,transferase activity; GO:0016746,acyltransferase activity; GO:0016747,acyltransferase activity, transferring groups other than amino-acy…
IFM89_018346	GO:0005199,structural constituent of cell wall; GO:0009664,plant-type cell wall organization; GO:0003674,molecular_function; GO:0005198,structural molecule activity; GO:0008150,biological_process; GO:0009987,cellular process; GO:0016043,cellular component organization; GO:0045229,external encapsulating structure organization; GO:0071554,cell wall organization or biogenesis; GO:0071555,cell wall o…
IFM89_015015	GO:0016021,integral component of membrane; GO:0004650,polygalacturonase activity; GO:0005975,carbohydrate metabolic process; GO:0003674,molecular_function; GO:0003824,catalytic activity; GO:0004553,hydrolase activity, hydrolyzing O-glycosyl compounds; GO:0016787,hydrolase activity; GO:0016798,hydrolase activity, acting on glycosyl bonds; GO:0008150,biological_process; GO:0008152,metabolic process…
IFM89_015064	GO:0005737,cytoplasm; GO:0005739,mitochondrion; GO:0005634,nucleus; GO:0016787,hydrolase activity; GO:0046872,metal ion binding; GO:0003674,molecular_function; GO:0003824,catalytic activity; GO:0005488,binding; GO:0043167,ion binding; GO:0043169,cation binding; GO:0005575,cellular_component; GO:0005622,intracellular anatomical structure; GO:0110165,cellular anatomical entity; GO:0043226,organelle…
IFM89_028401	GO:0005737,cytoplasm; GO:0005634,nucleus; GO:0005516,calmodulin binding; GO:0017017,MAP kinase tyrosine/serine/threonine phosphatase activity; GO:0017018,myosin phosphatase activity; GO:0004721,phosphoprotein phosphatase activity; GO:0004725,protein tyrosine phosphatase activity; GO:0008138,protein tyrosine/serine/threonine phosphatase activity; GO:0008330,protein tyrosine/threonine phosphatase a…
IFM89_024554	GO:0042802,identical protein binding; GO:0050275,scopoletin glucosyltransferase activity; GO:0003674,molecular_function; GO:0005488,binding; GO:0005515,protein binding; GO:0003824,catalytic activity; GO:0008194,UDP-glycosyltransferase activity; GO:0016740,transferase activity; GO:0016757,glycosyltransferase activity; GO:0016758,hexosyltransferase activity; GO:0035251,UDP-glucosyltransferase activ…
IFM89_028953	GO:0005737,cytoplasm; GO:0005829,cytosol; GO:0005634,nucleus; GO:0030687,preribosome, large subunit precursor; GO:0003700,DNA-binding transcription factor activity; GO:0000976,transcription cis-regulatory region binding; GO:0008270,zinc ion binding; GO:0009631,cold acclimation; GO:0090070,positive regulation of ribosome biogenesis; GO:0006355,regulation of DNA-templated transcription; GO:0042273,…
IFM89_005781	GO:0009507,chloroplast; GO:0003729,mRNA binding; GO:0003674,molecular_function; GO:0003676,nucleic acid binding; GO:0003723,RNA binding; GO:0005488,binding; GO:0097159,organic cyclic compound binding; GO:1901363,heterocyclic compound binding; GO:0005575,cellular_component; GO:0005622,intracellular anatomical structure; GO:0005737,cytoplasm; GO:0009536,plastid; GO:0043226,organelle; GO:0043227,mem…
IFM89_011869	GO:0009507,chloroplast; GO:0005829,cytosol; GO:0005634,nucleus; GO:0036033,mediator complex binding; GO:0071456,cellular response to hypoxia; GO:0050832,defense response to fungus; GO:0009793,embryo development ending in seed dormancy; GO:0010183,pollen tube guidance; GO:0003674,molecular_function; GO:0005488,binding; GO:0044877,protein-containing complex binding; GO:0001666,response to hypoxia; …
novel.6607	GO:0016021,integral component of membrane; GO:0020037,heme binding; GO:0005506,iron ion binding; GO:0004497,monooxygenase activity; GO:0016705,oxidoreductase activity, acting on paired donors, with incorporation or reduction of molecular oxygen; GO:0003674,molecular_function; GO:0005488,binding; GO:0046906,tetrapyrrole binding; GO:0097159,organic cyclic compound binding; GO:1901363,heterocyclic c…
novel.655	GO:0005737,cytoplasm; GO:0000932,P-body; GO:0035619,root hair tip; GO:0071472,cellular response to salt stress; GO:0080001,mucilage extrusion from seed coat; GO:0009825,multidimensional cell growth; GO:0033962,P-body assembly; GO:1902892,positive regulation of root hair elongation; GO:1904580,regulation of intracellular mRNA localization; GO:1903335,regulation of vacuolar transport; GO:0010090,tr…
IFM89_002103	GO:0016021,integral component of membrane; GO:0046872,metal ion binding; GO:0016740,transferase activity; GO:0016567,protein ubiquitination; GO:0003674,molecular_function; GO:0005488,binding; GO:0043167,ion binding; GO:0043169,cation binding; GO:0003824,catalytic activity; GO:0006807,nitrogen compound metabolic process; GO:0008150,biological_process; GO:0008152,metabolic process; GO:0019538,prote…
IFM89_035504	GO:0006952,defense response; GO:0006950,response to stress; GO:0008150,biological_process; GO:0050896,response to stimulus
IFM89_004583	GO:0008194,UDP-glycosyltransferase activity; GO:0003674,molecular_function; GO:0003824,catalytic activity; GO:0016740,transferase activity; GO:0016757,glycosyltransferase activity
IFM89_004145	GO:0005737,cytoplasm; GO:0005634,nucleus; GO:0031348,negative regulation of defense response; GO:0042177,negative regulation of protein catabolic process; GO:0009626,plant-type hypersensitive response; GO:0016567,protein ubiquitination; GO:0006950,response to stress; GO:0006952,defense response; GO:0008150,biological_process; GO:0031347,regulation of defense response; GO:0048519,negative regulati…
IFM89_035004	GO:0000785,chromatin; GO:0042555,MCM complex; GO:0000347,THO complex; GO:0005524,ATP binding; GO:0016887,ATP hydrolysis activity; GO:0003677,DNA binding; GO:0003678,DNA helicase activity; GO:0046872,metal ion binding; GO:0007049,cell cycle; GO:0006270,DNA replication initiation; GO:0006268,DNA unwinding involved in DNA replication; GO:0009793,embryo development ending in seed dormancy; GO:1905775…
IFM89_018184	GO:0005829,cytosol; GO:0090406,pollen tube; GO:0047350,glucuronate-1-phosphate uridylyltransferase activity; GO:0010491,UTP:arabinose-1-phosphate uridylyltransferase activity; GO:0017103,UTP:galactose-1-phosphate uridylyltransferase activity; GO:0003983,UTP:glucose-1-phosphate uridylyltransferase activity; GO:0047338,UTP:xylose-1-phosphate uridylyltransferase activity; GO:0009226,nucleotide-sugar…
novel.8271	GO:0048046,apoplast; GO:0009505,plant-type cell wall; GO:0099503,secretory vesicle; GO:0004557,alpha-galactosidase activity; GO:0052692,raffinose alpha-galactosidase activity; GO:0005975,carbohydrate metabolic process; GO:0071555,cell wall organization; GO:0009965,leaf morphogenesis; GO:0009911,positive regulation of flower development; GO:0009620,response to fungus; GO:0003674,molecular_function…
IFM89_010578	GO:0008289,lipid binding; GO:0006869,lipid transport; GO:0003674,molecular_function; GO:0005488,binding; GO:0006810,transport; GO:0008150,biological_process; GO:0010876,lipid localization; GO:0033036,macromolecule localization; GO:0051179,localization; GO:0051234,establishment of localization; GO:0071702,organic substance transport
IFM89_034430	GO:0009941,chloroplast envelope; GO:0005811,lipid droplet; GO:0031966,mitochondrial membrane; GO:0005739,mitochondrion; GO:0000325,plant-type vacuole; GO:0005886,plasma membrane; GO:0009536,plastid; GO:0016491,oxidoreductase activity; GO:0009247,glycolipid biosynthetic process; GO:0003674,molecular_function; GO:0003824,catalytic activity; GO:0006629,lipid metabolic process; GO:0006643,membrane li…
IFM89_021595	GO:0005634,nucleus; GO:0003677,DNA binding; GO:0003674,molecular_function; GO:0003676,nucleic acid binding; GO:0005488,binding; GO:0097159,organic cyclic compound binding; GO:1901363,heterocyclic compound binding; GO:0005575,cellular_component; GO:0005622,intracellular anatomical structure; GO:0043226,organelle; GO:0043227,membrane-bounded organelle; GO:0043229,intracellular organelle; GO:0043231…
IFM89_022042	GO:0005634,nucleus; GO:0003700,DNA-binding transcription factor activity; GO:0046983,protein dimerization activity; GO:0000976,transcription cis-regulatory region binding; GO:0006355,regulation of DNA-templated transcription; GO:0003674,molecular_function; GO:0140110,transcription regulator activity; GO:0005488,binding; GO:0005515,protein binding; GO:0001067,transcription regulatory region nuclei…
IFM89_022769	GO:0016021,integral component of membrane; GO:0016020,membrane; GO:0009705,plant-type vacuole membrane; GO:0005774,vacuolar membrane; GO:0015299,solute:proton antiporter activity; GO:0022857,transmembrane transporter activity; GO:0042910,xenobiotic transmembrane transporter activity; GO:0009813,flavonoid biosynthetic process; GO:0010231,maintenance of seed dormancy; GO:0010023,proanthocyanidin bi…
IFM89_038068	GO:0016021,integral component of membrane; GO:0005886,plasma membrane; GO:0005524,ATP binding; GO:0042802,identical protein binding; GO:0042277,peptide binding; GO:0001653,peptide receptor activity; GO:0004674,protein serine/threonine kinase activity; GO:0010074,maintenance of meristem identity; GO:0006468,protein phosphorylation; GO:0080092,regulation of pollen tube growth; GO:0010082,regulation…
IFM89_027685	GO:0005737,cytoplasm; GO:0005634,nucleus; GO:0046872,metal ion binding; GO:0004748,ribonucleoside-diphosphate reductase activity, thioredoxin disulfide as acceptor; GO:0009263,deoxyribonucleotide biosynthetic process; GO:0006281,DNA repair; GO:0006260,DNA replication; GO:0012501,programmed cell death; GO:0051726,regulation of cell cycle; GO:0003674,molecular_function; GO:0005488,binding; GO:00431…
IFM89_008070	GO:0005829,cytosol; GO:0005634,nucleus; GO:0051287,NAD binding; GO:0003979,UDP-glucose 6-dehydrogenase activity; GO:0006024,glycosaminoglycan biosynthetic process; GO:0006065,UDP-glucuronate biosynthetic process; GO:0000166,nucleotide binding; GO:0003674,molecular_function; GO:0005488,binding; GO:0036094,small molecule binding; GO:0097159,organic cyclic compound binding; GO:1901265,nucleoside pho…
IFM89_012276	GO:0005829,cytosol; GO:0016020,membrane; GO:0003873,6-phosphofructo-2-kinase activity; GO:0005524,ATP binding; GO:0004331,fructose-2,6-bisphosphate 2-phosphatase activity; GO:2001070,starch binding; GO:0006003,fructose 2,6-bisphosphate metabolic process; GO:0006002,fructose 6-phosphate metabolic process; GO:0006000,fructose metabolic process; GO:0043609,regulation of carbon utilization; GO:000367…
IFM89_024760	GO:0005576,extracellular region; GO:0016298,lipase activity; GO:0004806,triglyceride lipase activity; GO:0002213,defense response to insect; GO:0016042,lipid catabolic process; GO:0003674,molecular_function; GO:0003824,catalytic activity; GO:0016787,hydrolase activity; GO:0016788,hydrolase activity, acting on ester bonds; GO:0052689,carboxylic ester hydrolase activity; GO:0006950,response to stre…
IFM89_012646	GO:0016021,integral component of membrane; GO:0016020,membrane; GO:0015297,antiporter activity; GO:0022857,transmembrane transporter activity; GO:0042910,xenobiotic transmembrane transporter activity; GO:1990961,xenobiotic detoxification by transmembrane export across the plasma membrane; GO:0003674,molecular_function; GO:0005215,transporter activity; GO:0015291,secondary active transmembrane tra…
IFM89_034005	GO:0016021,integral component of membrane; GO:0016020,membrane; GO:0005739,mitochondrion; GO:0000741,karyogamy; GO:0010197,polar nucleus fusion; GO:0009651,response to salt stress; GO:0006996,organelle organization; GO:0006997,nucleus organization; GO:0008150,biological_process; GO:0009987,cellular process; GO:0016043,cellular component organization; GO:0048284,organelle fusion; GO:0071840,cellul…
IFM89_021439	GO:0009507,chloroplast; GO:0051539,4 iron, 4 sulfur cluster binding; GO:0042802,identical protein binding; GO:0051536,iron-sulfur cluster binding; GO:0046872,metal ion binding; GO:0051266,sirohydrochlorin ferrochelatase activity; GO:0006979,response to oxidative stress; GO:0019354,siroheme biosynthetic process; GO:0003674,molecular_function; GO:0005488,binding; GO:0051540,metal cluster binding; G…
IFM89_008936	GO:0005737,cytoplasm; GO:0016021,integral component of membrane; GO:0016757,glycosyltransferase activity; GO:0006004,fucose metabolic process; GO:0003674,molecular_function; GO:0003824,catalytic activity; GO:0016740,transferase activity; GO:0005975,carbohydrate metabolic process; GO:0005996,monosaccharide metabolic process; GO:0008150,biological_process; GO:0008152,metabolic process; GO:0019318,h…
IFM89_018939	GO:0005634,nucleus; GO:0071249,cellular response to nitrate; GO:0015706,nitrate transmembrane transport; GO:0071705,nitrogen compound transport; GO:0010167,response to nitrate; GO:1901698,response to nitrogen compound; GO:0008150,biological_process; GO:0009987,cellular process; GO:0010035,response to inorganic substance; GO:0042221,response to chemical; GO:0050896,response to stimulus; GO:0051716…
novel.8001	GO:0016020,membrane; GO:0005575,cellular_component; GO:0110165,cellular anatomical entity
IFM89_006714	GO:0005783,endoplasmic reticulum; GO:0016021,integral component of membrane; GO:0005886,plasma membrane; GO:0008157,protein phosphatase 1 binding; GO:0019888,protein phosphatase regulator activity; GO:0035304,regulation of protein dephosphorylation; GO:0003674,molecular_function; GO:0005488,binding; GO:0005515,protein binding; GO:0019899,enzyme binding; GO:0019902,phosphatase binding; GO:0019903,…
IFM89_005973	GO:0016021,integral component of membrane; GO:0016020,membrane; GO:0005345,purine nucleobase transmembrane transporter activity; GO:0015211,purine nucleoside transmembrane transporter activity; GO:0006863,purine nucleobase transport; GO:0003674,molecular_function; GO:0005215,transporter activity; GO:0015205,nucleobase transmembrane transporter activity; GO:0022857,transmembrane transporter activi…
novel.3586	GO:0005789,endoplasmic reticulum membrane; GO:0019898,extrinsic component of membrane; GO:0000407,phagophore assembly site; GO:0034045,phagophore assembly site membrane; GO:0032266,phosphatidylinositol-3-phosphate binding; GO:0000045,autophagosome assembly; GO:0000422,autophagy of mitochondrion; GO:0030242,autophagy of peroxisome; GO:0042742,defense response to bacterium; GO:0050832,defense respo…
IFM89_005233	GO:0005829,cytosol; GO:0005783,endoplasmic reticulum; GO:0009505,plant-type cell wall; GO:0005886,plasma membrane; GO:0009506,plasmodesma; GO:0005773,vacuole; GO:0009058,biosynthetic process; GO:0008150,biological_process; GO:0008152,metabolic process; GO:0005575,cellular_component; GO:0005622,intracellular anatomical structure; GO:0005737,cytoplasm; GO:0110165,cellular anatomical entity; GO:0012…
IFM89_008183	GO:0016021,integral component of membrane; GO:0080115,myosin XI tail binding; GO:0003674,molecular_function; GO:0005488,binding; GO:0005515,protein binding; GO:0008092,cytoskeletal protein binding; GO:0017022,myosin binding; GO:0032029,myosin tail binding; GO:0032036,myosin heavy chain binding; GO:0005575,cellular_component; GO:0016020,membrane; GO:0031224,intrinsic component of membrane; GO:0110…
novel.8389	GO:0005739,mitochondrion; GO:0004416,hydroxyacylglutathione hydrolase activity; GO:0005506,iron ion binding; GO:0008270,zinc ion binding; GO:0019243,methylglyoxal catabolic process to D-lactate via S-lactoyl-glutathione; GO:0003674,molecular_function; GO:0003824,catalytic activity; GO:0016787,hydrolase activity; GO:0016788,hydrolase activity, acting on ester bonds; GO:0016790,thiolester hydrolase…
IFM89_017008	GO:0005694,chromosome; GO:0000993,RNA polymerase II complex binding; GO:0009411,response to UV; GO:0006283,transcription-coupled nucleotide-excision repair; GO:0001098,basal transcription machinery binding; GO:0001099,basal RNA polymerase II transcription machinery binding; GO:0003674,molecular_function; GO:0005488,binding; GO:0005515,protein binding; GO:0019899,enzyme binding; GO:0043175,RNA pol…
IFM89_023688	GO:0005737,cytoplasm; GO:0005829,cytosol; GO:0005794,Golgi apparatus; GO:0005739,mitochondrion; GO:0005634,nucleus; GO:0009505,plant-type cell wall; GO:0000325,plant-type vacuole; GO:0005886,plasma membrane; GO:0005524,ATP binding; GO:0016887,ATP hydrolysis activity; GO:0140662,ATP-dependent protein folding chaperone; GO:0031072,heat shock protein binding; GO:0051787,misfolded protein binding; GO…
IFM89_004946	GO:0005886,plasma membrane; GO:0005575,cellular_component; GO:0016020,membrane; GO:0071944,cell periphery; GO:0110165,cellular anatomical entity
IFM89_011467	GO:0005737,cytoplasm; GO:0000139,Golgi membrane; GO:0016021,integral component of membrane; GO:0008194,UDP-glycosyltransferase activity; GO:0006004,fucose metabolic process; GO:0045489,pectin biosynthetic process; GO:0010395,rhamnogalacturonan I metabolic process; GO:0010214,seed coat development; GO:0003674,molecular_function; GO:0003824,catalytic activity; GO:0016740,transferase activity; GO:00…
IFM89_019797	GO:0031225,anchored component of membrane; GO:0046658,anchored component of plasma membrane; GO:0005829,cytosol; GO:0005886,plasma membrane; GO:0099503,secretory vesicle; GO:0005575,cellular_component; GO:0016020,membrane; GO:0031224,intrinsic component of membrane; GO:0110165,cellular anatomical entity; GO:0031226,intrinsic component of plasma membrane; GO:0071944,cell periphery; GO:0005622,intr…
IFM89_010980	GO:0005789,endoplasmic reticulum membrane; GO:0016021,integral component of membrane; GO:0046872,metal ion binding; GO:0061630,ubiquitin protein ligase activity; GO:0004842,ubiquitin-protein transferase activity; GO:0043161,proteasome-mediated ubiquitin-dependent protein catabolic process; GO:0016567,protein ubiquitination; GO:0009409,response to cold; GO:0009723,response to ethylene; GO:0006970,…
IFM89_016695	GO:0005737,cytoplasm; GO:0016021,integral component of membrane; GO:0005730,nucleolus; GO:0005634,nucleus; GO:0009524,phragmoplast; GO:0005819,spindle; GO:0003779,actin binding; GO:0051015,actin filament binding; GO:0045010,actin nucleation; GO:0003674,molecular_function; GO:0005488,binding; GO:0005515,protein binding; GO:0008092,cytoskeletal protein binding; GO:0044877,protein-containing complex…
IFM89_006164	GO:0005634,nucleus; GO:0016567,protein ubiquitination; GO:0009651,response to salt stress; GO:0006807,nitrogen compound metabolic process; GO:0008150,biological_process; GO:0008152,metabolic process; GO:0019538,protein metabolic process; GO:0032446,protein modification by small protein conjugation; GO:0036211,protein modification process; GO:0043170,macromolecule metabolic process; GO:0043412,mac…
IFM89_038340	GO:0005737,cytoplasm; GO:0000151,ubiquitin ligase complex; GO:0046872,metal ion binding; GO:0031624,ubiquitin conjugating enzyme binding; GO:0061630,ubiquitin protein ligase activity; GO:0032436,positive regulation of proteasomal ubiquitin-dependent protein catabolic process; GO:0000209,protein polyubiquitination; GO:0006511,ubiquitin-dependent protein catabolic process; GO:0003674,molecular_func…
IFM89_005219	GO:0005681,spliceosomal complex; GO:0003729,mRNA binding; GO:0000245,spliceosomal complex assembly; GO:0003674,molecular_function; GO:0003676,nucleic acid binding; GO:0003723,RNA binding; GO:0005488,binding; GO:0097159,organic cyclic compound binding; GO:1901363,heterocyclic compound binding; GO:0000375,RNA splicing, via transesterification reactions; GO:0000377,RNA splicing, via transesterificat…
IFM89_024850	GO:0005737,cytoplasm; GO:0005635,nuclear envelope; GO:0031080,nuclear pore outer ring; GO:0035859,Seh1-associated complex; GO:0005198,structural molecule activity; GO:0034198,cellular response to amino acid starvation; GO:0051028,mRNA transport; GO:1904263,positive regulation of TORC1 signaling; GO:0015031,protein transport; GO:0003674,molecular_function; GO:0006950,response to stress; GO:0007154…
IFM89_035085	GO:0080008,Cul4-RING E3 ubiquitin ligase complex; GO:0016607,nuclear speck; GO:0005634,nucleus; GO:0071011,precatalytic spliceosome; GO:0000398,mRNA splicing, via spliceosome; GO:0008380,RNA splicing; GO:0000375,RNA splicing, via transesterification reactions; GO:0000377,RNA splicing, via transesterification reactions with bulged adenosine as nucleophile; GO:0006139,nucleobase-containing compound…
IFM89_014291	GO:0016746,acyltransferase activity; GO:0016491,oxidoreductase activity; GO:0009820,alkaloid metabolic process; GO:0003674,molecular_function; GO:0003824,catalytic activity; GO:0016740,transferase activity; GO:0006807,nitrogen compound metabolic process; GO:0008150,biological_process; GO:0008152,metabolic process; GO:0071704,organic substance metabolic process; GO:1901564,organonitrogen compound …
IFM89_023244	GO:0005737,cytoplasm; GO:0005768,endosome; GO:0005794,Golgi apparatus; GO:0032580,Golgi cisterna membrane; GO:0000139,Golgi membrane; GO:0000138,Golgi trans cisterna; GO:0016021,integral component of membrane; GO:0016020,membrane; GO:0005886,plasma membrane; GO:0005802,trans-Golgi network; GO:0008460,dTDP-glucose 4,6-dehydratase activity; GO:0070403,NAD+ binding; GO:0048040,UDP-glucuronate decarb…
IFM89_016425	GO:0006952,defense response; GO:0007165,signal transduction; GO:0006950,response to stress; GO:0008150,biological_process; GO:0050896,response to stimulus; GO:0007154,cell communication; GO:0009987,cellular process; GO:0023052,signaling; GO:0050789,regulation of biological process; GO:0050794,regulation of cellular process; GO:0051716,cellular response to stimulus; GO:0065007,biological regulation
IFM89_039384	GO:0009507,chloroplast; GO:0009941,chloroplast envelope; GO:0009706,chloroplast inner membrane; GO:0009535,chloroplast thylakoid membrane; GO:0005745,m-AAA complex; GO:0005739,mitochondrion; GO:0009536,plastid; GO:0062091,Ycf2/FtsHi complex; GO:0005524,ATP binding; GO:0016887,ATP hydrolysis activity; GO:0004176,ATP-dependent peptidase activity; GO:0016464,chloroplast protein-transporting ATPase a…
IFM89_022059	GO:0005634,nucleus; GO:0005524,ATP binding; GO:0016887,ATP hydrolysis activity; GO:0003723,RNA binding; GO:0003724,RNA helicase activity; GO:0000166,nucleotide binding; GO:0003674,molecular_function; GO:0005488,binding; GO:0017076,purine nucleotide binding; GO:0030554,adenyl nucleotide binding; GO:0032553,ribonucleotide binding; GO:0032555,purine ribonucleotide binding; GO:0032559,adenyl ribonucl…
IFM89_027332	GO:0005737,cytoplasm; GO:0005886,plasma membrane; GO:0005524,ATP binding; GO:0004305,ethanolamine kinase activity; GO:0006646,phosphatidylethanolamine biosynthetic process; GO:0008654,phospholipid biosynthetic process; GO:0016310,phosphorylation; GO:0000166,nucleotide binding; GO:0003674,molecular_function; GO:0005488,binding; GO:0017076,purine nucleotide binding; GO:0030554,adenyl nucleotide bin…
novel.7993	GO:0005634,nucleus; GO:0003677,DNA binding; GO:0003700,DNA-binding transcription factor activity; GO:0008289,lipid binding; GO:0003674,molecular_function; GO:0003676,nucleic acid binding; GO:0005488,binding; GO:0097159,organic cyclic compound binding; GO:1901363,heterocyclic compound binding; GO:0140110,transcription regulator activity; GO:0005575,cellular_component; GO:0005622,intracellular anat…
IFM89_020140	GO:0003676,nucleic acid binding; GO:0008270,zinc ion binding; GO:0003674,molecular_function; GO:0005488,binding; GO:0097159,organic cyclic compound binding; GO:1901363,heterocyclic compound binding; GO:0043167,ion binding; GO:0043169,cation binding; GO:0046872,metal ion binding; GO:0046914,transition metal ion binding
IFM89_036711	GO:0016021,integral component of membrane; GO:0005886,plasma membrane; GO:0015112,nitrate transmembrane transporter activity; GO:0015293,symporter activity; GO:0009734,auxin-activated signaling pathway; GO:0010540,basipetal auxin transport; GO:0048527,lateral root development; GO:0042128,nitrate assimilation; GO:0015706,nitrate transmembrane transport; GO:0006857,oligopeptide transport; GO:004857…
IFM89_021996	GO:0080008,Cul4-RING E3 ubiquitin ligase complex; GO:0005737,cytoplasm; GO:0005783,endoplasmic reticulum; GO:0005634,nucleus; GO:0009505,plant-type cell wall; GO:0000974,Prp19 complex; GO:0071006,U2-type catalytic step 1 spliceosome; GO:0061630,ubiquitin protein ligase activity; GO:0004842,ubiquitin-protein transferase activity; GO:0042742,defense response to bacterium; GO:0006281,DNA repair; GO:…
IFM89_000197	GO:0009507,chloroplast; GO:0009941,chloroplast envelope; GO:0031969,chloroplast membrane; GO:0016021,integral component of membrane; GO:0009536,plastid; GO:0005524,ATP binding; GO:0004672,protein kinase activity; GO:0106310,protein serine kinase activity; GO:0004674,protein serine/threonine kinase activity; GO:0034599,cellular response to oxidative stress; GO:0007623,circadian rhythm; GO:0055072,…
IFM89_003473	GO:0008289,lipid binding; GO:0006869,lipid transport; GO:0003674,molecular_function; GO:0005488,binding; GO:0006810,transport; GO:0008150,biological_process; GO:0010876,lipid localization; GO:0033036,macromolecule localization; GO:0051179,localization; GO:0051234,establishment of localization; GO:0071702,organic substance transport
IFM89_000853	GO:0009507,chloroplast; GO:0009707,chloroplast outer membrane; GO:0005829,cytosol; GO:0009658,chloroplast organization; GO:0009902,chloroplast relocation; GO:0006996,organelle organization; GO:0008150,biological_process; GO:0009657,plastid organization; GO:0009987,cellular process; GO:0016043,cellular component organization; GO:0071840,cellular component organization or biogenesis; GO:0019750,chl…
IFM89_021429	GO:0009507,chloroplast; GO:0009941,chloroplast envelope; GO:0005737,cytoplasm; GO:0005886,plasma membrane; GO:0009536,plastid; GO:0004028,3-chloroallyl aldehyde dehydrogenase activity; GO:0004029,aldehyde dehydrogenase (NAD+) activity; GO:0033721,aldehyde dehydrogenase (NADP+) activity; GO:0043878,glyceraldehyde-3-phosphate dehydrogenase (NAD+) (non-phosphorylating) activity; GO:0006081,cellular …
IFM89_017168	GO:0005829,cytosol; GO:0005634,nucleus; GO:0010427,abscisic acid binding; GO:0004864,protein phosphatase inhibitor activity; GO:0038023,signaling receptor activity; GO:0009738,abscisic acid-activated signaling pathway; GO:0006952,defense response; GO:0003674,molecular_function; GO:0005488,binding; GO:0008289,lipid binding; GO:0019840,isoprenoid binding; GO:0031406,carboxylic acid binding; GO:0033…
IFM89_018828	GO:0016021,integral component of membrane; GO:0005886,plasma membrane; GO:0035618,root hair; GO:0005262,calcium channel activity; GO:0005516,calmodulin binding; GO:0030552,cAMP binding; GO:0030553,cGMP binding; GO:0005223,intracellular cGMP-activated cation channel activity; GO:0003674,molecular_function; GO:0005215,transporter activity; GO:0005216,ion channel activity; GO:0005261,cation channel …
IFM89_002430	GO:0005783,endoplasmic reticulum; GO:0005794,Golgi apparatus; GO:0016021,integral component of membrane; GO:0005886,plasma membrane; GO:0019706,protein-cysteine S-palmitoyltransferase activity; GO:0016417,S-acyltransferase activity; GO:1990918,double-strand break repair involved in meiotic recombination; GO:0018230,peptidyl-L-cysteine S-palmitoylation; GO:0018345,protein palmitoylation; GO:000661…
IFM89_000842	GO:0005634,nucleus; GO:0003700,DNA-binding transcription factor activity; GO:0046872,metal ion binding; GO:0000976,transcription cis-regulatory region binding; GO:0009736,cytokinin-activated signaling pathway; GO:0009873,ethylene-activated signaling pathway; GO:0009740,gibberellic acid mediated signaling pathway; GO:0048510,regulation of timing of transition from vegetative to reproductive phase;…
IFM89_017087	GO:0005783,endoplasmic reticulum; GO:0030176,integral component of endoplasmic reticulum membrane; GO:0005886,plasma membrane; GO:0005096,GTPase activator activity; GO:0005085,guanyl-nucleotide exchange factor activity; GO:0016036,cellular response to phosphate starvation; GO:0006888,endoplasmic reticulum to Golgi vesicle-mediated transport; GO:0006817,phosphate ion transport; GO:0009306,protein …
IFM89_034539	GO:0005829,cytosol; GO:0047631,ADP-ribose diphosphatase activity; GO:0046872,metal ion binding; GO:0051287,NAD binding; GO:0035529,NADH pyrophosphatase activity; GO:0009611,response to wounding; GO:0003674,molecular_function; GO:0003824,catalytic activity; GO:0016462,pyrophosphatase activity; GO:0016787,hydrolase activity; GO:0016817,hydrolase activity, acting on acid anhydrides; GO:0016818,hydro…
IFM89_025955	GO:0004842,ubiquitin-protein transferase activity; GO:0010305,leaf vascular tissue pattern formation; GO:0010928,regulation of auxin mediated signaling pathway; GO:0031146,SCF-dependent proteasomal ubiquitin-dependent protein catabolic process; GO:0060776,simple leaf morphogenesis; GO:0003674,molecular_function; GO:0003824,catalytic activity; GO:0016740,transferase activity; GO:0019787,ubiquitin-…
IFM89_019699	GO:0005737,cytoplasm; GO:0009738,abscisic acid-activated signaling pathway; GO:0009789,positive regulation of abscisic acid-activated signaling pathway; GO:0009737,response to abscisic acid; GO:0006970,response to osmotic stress; GO:0009651,response to salt stress; GO:0007154,cell communication; GO:0007165,signal transduction; GO:0008150,biological_process; GO:0009719,response to endogenous stimu…
novel.8692	GO:0005737,cytoplasm; GO:0005856,cytoskeleton; GO:0005886,plasma membrane; GO:0005516,calmodulin binding; GO:0003674,molecular_function; GO:0005488,binding; GO:0005515,protein binding; GO:0005575,cellular_component; GO:0005622,intracellular anatomical structure; GO:0110165,cellular anatomical entity; GO:0043226,organelle; GO:0043228,non-membrane-bounded organelle; GO:0043229,intracellular organel…
IFM89_020279	GO:0005840,ribosome; GO:0003723,RNA binding; GO:0003735,structural constituent of ribosome; GO:0006412,translation; GO:0003674,molecular_function; GO:0003676,nucleic acid binding; GO:0005488,binding; GO:0097159,organic cyclic compound binding; GO:1901363,heterocyclic compound binding; GO:0005198,structural molecule activity; GO:0006518,peptide metabolic process; GO:0006807,nitrogen compound metab…
IFM89_014967	GO:0048046,apoplast; GO:0005829,cytosol; GO:0009505,plant-type cell wall; GO:0009506,plasmodesma; GO:0005773,vacuole; GO:0004565,beta-galactosidase activity; GO:0030246,carbohydrate binding; GO:0005975,carbohydrate metabolic process; GO:0003674,molecular_function; GO:0003824,catalytic activity; GO:0004553,hydrolase activity, hydrolyzing O-glycosyl compounds; GO:0015925,galactosidase activity; GO:…
IFM89_038472	GO:0005576,extracellular region; GO:0004190,aspartic-type endopeptidase activity; GO:0006508,proteolysis; GO:0003674,molecular_function; GO:0003824,catalytic activity; GO:0004175,endopeptidase activity; GO:0008233,peptidase activity; GO:0016787,hydrolase activity; GO:0070001,aspartic-type peptidase activity; GO:0140096,catalytic activity, acting on a protein; GO:0006807,nitrogen compound metaboli…
IFM89_036989	GO:0031969,chloroplast membrane; GO:0016717,oxidoreductase activity, acting on paired donors, with oxidation of a pair of donors resulting in the reduction of molecular oxygen to two molecules of water; GO:0006636,unsaturated fatty acid biosynthetic process; GO:0003674,molecular_function; GO:0003824,catalytic activity; GO:0016491,oxidoreductase activity; GO:0016705,oxidoreductase activity, acting…
novel.2403	GO:0009507,chloroplast; GO:0009543,chloroplast thylakoid lumen; GO:0005829,cytosol; GO:0009579,thylakoid; GO:0031977,thylakoid lumen; GO:0005575,cellular_component; GO:0005622,intracellular anatomical structure; GO:0005737,cytoplasm; GO:0009536,plastid; GO:0043226,organelle; GO:0043227,membrane-bounded organelle; GO:0043229,intracellular organelle; GO:0043231,intracellular membrane-bounded organe…
IFM89_017893	GO:0005576,extracellular region; GO:0016788,hydrolase activity, acting on ester bonds; GO:0016042,lipid catabolic process; GO:0003674,molecular_function; GO:0003824,catalytic activity; GO:0016787,hydrolase activity; GO:0006629,lipid metabolic process; GO:0008150,biological_process; GO:0008152,metabolic process; GO:0009056,catabolic process; GO:0044238,primary metabolic process; GO:0071704,organic…
IFM89_017642	GO:0005829,cytosol; GO:0005789,endoplasmic reticulum membrane; GO:0016021,integral component of membrane; GO:0005739,mitochondrion; GO:0009617,response to bacterium; GO:0008150,biological_process; GO:0009605,response to external stimulus; GO:0009607,response to biotic stimulus; GO:0043207,response to external biotic stimulus; GO:0044419,biological process involved in interspecies interaction betw…
IFM89_027922	GO:0005730,nucleolus; GO:0005886,plasma membrane; GO:0032040,small-subunit processome; GO:0003723,RNA binding; GO:0009553,embryo sac development; GO:0006364,rRNA processing; GO:0003674,molecular_function; GO:0003676,nucleic acid binding; GO:0005488,binding; GO:0097159,organic cyclic compound binding; GO:1901363,heterocyclic compound binding; GO:0007275,multicellular organism development; GO:00081…
IFM89_014907	GO:0005737,cytoplasm; GO:0005874,microtubule; GO:0005525,GTP binding; GO:0005200,structural constituent of cytoskeleton; GO:0000226,microtubule cytoskeleton organization; GO:0007017,microtubule-based process; GO:0000278,mitotic cell cycle; GO:0000166,nucleotide binding; GO:0003674,molecular_function; GO:0005488,binding; GO:0017076,purine nucleotide binding; GO:0019001,guanyl nucleotide binding; G…
IFM89_018420	GO:0005634,nucleus; GO:0003700,DNA-binding transcription factor activity; GO:0000981,DNA-binding transcription factor activity, RNA polymerase II-specific; GO:0043565,sequence-specific DNA binding; GO:0000976,transcription cis-regulatory region binding; GO:0048826,cotyledon morphogenesis; GO:0009965,leaf morphogenesis; GO:0045893,positive regulation of DNA-templated transcription; GO:0080022,prim…
IFM89_005037	GO:0030131,clathrin adaptor complex; GO:0030665,clathrin-coated vesicle membrane; GO:0005829,cytosol; GO:0005794,Golgi apparatus; GO:0005886,plasma membrane; GO:0009506,plasmodesma; GO:0030276,clathrin binding; GO:0006886,intracellular protein transport; GO:0016192,vesicle-mediated transport; GO:0003674,molecular_function; GO:0005488,binding; GO:0005515,protein binding; GO:0006810,transport; GO:0…
IFM89_029616	GO:0061630,ubiquitin protein ligase activity; GO:0008270,zinc ion binding; GO:0003674,molecular_function; GO:0003824,catalytic activity; GO:0004842,ubiquitin-protein transferase activity; GO:0016740,transferase activity; GO:0019787,ubiquitin-like protein transferase activity; GO:0061659,ubiquitin-like protein ligase activity; GO:0140096,catalytic activity, acting on a protein; GO:0005488,binding;…
IFM89_015857	GO:0005737,cytoplasm; GO:0097573,glutathione oxidoreductase activity; GO:0003674,molecular_function; GO:0003824,catalytic activity; GO:0015035,protein-disulfide reductase activity; GO:0015036,disulfide oxidoreductase activity; GO:0016491,oxidoreductase activity; GO:0016667,oxidoreductase activity, acting on a sulfur group of donors; GO:0140096,catalytic activity, acting on a protein; GO:0005575,c…
IFM89_017706	GO:0032442,phenylcoumaran benzylic ether reductase activity; GO:0009807,lignan biosynthetic process; GO:0003674,molecular_function; GO:0003824,catalytic activity; GO:0016491,oxidoreductase activity; GO:0016614,oxidoreductase activity, acting on CH-OH group of donors; GO:0016616,oxidoreductase activity, acting on the CH-OH group of donors, NAD or NADP as acceptor; GO:0006725,cellular aromatic comp…
IFM89_024206	GO:0005634,nucleus; GO:0045892,negative regulation of DNA-templated transcription; GO:0006139,nucleobase-containing compound metabolic process; GO:0006351,DNA-templated transcription; GO:0006355,regulation of DNA-templated transcription; GO:0006725,cellular aromatic compound metabolic process; GO:0006807,nitrogen compound metabolic process; GO:0008150,biological_process; GO:0008152,metabolic proc…
IFM89_026128	GO:0005829,cytosol; GO:0005575,cellular_component; GO:0005622,intracellular anatomical structure; GO:0005737,cytoplasm; GO:0110165,cellular anatomical entity
IFM89_000482	GO:0000786,nucleosome; GO:0005634,nucleus; GO:0003677,DNA binding; GO:0046982,protein heterodimerization activity; GO:0030527,structural constituent of chromatin; GO:0003674,molecular_function; GO:0003676,nucleic acid binding; GO:0005488,binding; GO:0097159,organic cyclic compound binding; GO:1901363,heterocyclic compound binding; GO:0005515,protein binding; GO:0046983,protein dimerization activi…
IFM89_000977	GO:0048193,Golgi vesicle transport; GO:0043087,regulation of GTPase activity; GO:0006810,transport; GO:0008150,biological_process; GO:0016192,vesicle-mediated transport; GO:0051179,localization; GO:0051234,establishment of localization; GO:0050790,regulation of catalytic activity; GO:0051336,regulation of hydrolase activity; GO:0065007,biological regulation; GO:0065009,regulation of molecular fun…
IFM89_021913	GO:0005634,nucleus; GO:0005886,plasma membrane; GO:0005096,GTPase activator activity; GO:0046872,metal ion binding; GO:0005543,phospholipid binding; GO:0009738,abscisic acid-activated signaling pathway; GO:0009789,positive regulation of abscisic acid-activated signaling pathway; GO:0043547,positive regulation of GTPase activity; GO:0003674,molecular_function; GO:0008047,enzyme activator activity;…
IFM89_015056	GO:0033290,eukaryotic 48S preinitiation complex; GO:0005850,eukaryotic translation initiation factor 2 complex; GO:0005851,eukaryotic translation initiation factor 2B complex; GO:0005794,Golgi apparatus; GO:0043614,multi-eIF complex; GO:0005634,nucleus; GO:0003729,mRNA binding; GO:0043022,ribosome binding; GO:0003743,translation initiation factor activity; GO:0003674,molecular_function; GO:000367…
IFM89_025181	GO:0005783,endoplasmic reticulum; GO:0005788,endoplasmic reticulum lumen; GO:0005739,mitochondrion; GO:0003980,UDP-glucose:glycoprotein glucosyltransferase activity; GO:0051082,unfolded protein binding; GO:0046283,anthocyanin-containing compound metabolic process; GO:0071712,ER-associated misfolded protein catabolic process; GO:0009626,plant-type hypersensitive response; GO:0018279,protein N-link…
IFM89_027588	GO:0008194,UDP-glycosyltransferase activity; GO:0003674,molecular_function; GO:0003824,catalytic activity; GO:0016740,transferase activity; GO:0016757,glycosyltransferase activity
IFM89_017744	GO:0009507,chloroplast; GO:0005737,cytoplasm; GO:0005829,cytosol; GO:0022626,cytosolic ribosome; GO:0000325,plant-type vacuole; GO:0005773,vacuole; GO:0004177,aminopeptidase activity; GO:0003729,mRNA binding; GO:1901149,salicylic acid binding; GO:0004252,serine-type endopeptidase activity; GO:0008240,tripeptidyl-peptidase activity; GO:0006508,proteolysis; GO:0003674,molecular_function; GO:0003824…
IFM89_023956	GO:0005576,extracellular region; GO:0003993,acid phosphatase activity; GO:0016788,hydrolase activity, acting on ester bonds; GO:0046872,metal ion binding; GO:0003674,molecular_function; GO:0003824,catalytic activity; GO:0016787,hydrolase activity; GO:0016791,phosphatase activity; GO:0042578,phosphoric ester hydrolase activity; GO:0005488,binding; GO:0043167,ion binding; GO:0043169,cation binding;…
IFM89_025486	GO:0019005,SCF ubiquitin ligase complex; GO:0031146,SCF-dependent proteasomal ubiquitin-dependent protein catabolic process; GO:0006508,proteolysis; GO:0006511,ubiquitin-dependent protein catabolic process; GO:0006807,nitrogen compound metabolic process; GO:0008150,biological_process; GO:0008152,metabolic process; GO:0009056,catabolic process; GO:0009057,macromolecule catabolic process; GO:000998…
IFM89_039883	GO:0048046,apoplast; GO:0102910,dirigent protein activity; GO:0019438,aromatic compound biosynthetic process; GO:0009699,phenylpropanoid biosynthetic process; GO:0009753,response to jasmonic acid; GO:0009411,response to UV; GO:0009611,response to wounding; GO:0003674,molecular_function; GO:0003824,catalytic activity; GO:0016491,oxidoreductase activity; GO:0016679,oxidoreductase activity, acting o…
IFM89_019958	GO:0005634,nucleus; GO:0003700,DNA-binding transcription factor activity; GO:0003680,minor groove of adenine-thymine-rich DNA binding; GO:0045087,innate immune response; GO:0045824,negative regulation of innate immune response; GO:0003674,molecular_function; GO:0140110,transcription regulator activity; GO:0000217,DNA secondary structure binding; GO:0003676,nucleic acid binding; GO:0003677,DNA bin…
IFM89_029765	GO:0005829,cytosol; GO:0008720,D-lactate dehydrogenase activity; GO:0047964,glyoxylate reductase (NAD+) activity; GO:0030267,glyoxylate reductase (NADP+) activity; GO:0016618,hydroxypyruvate reductase activity; GO:0051287,NAD binding; GO:0003674,molecular_function; GO:0003824,catalytic activity; GO:0004457,lactate dehydrogenase activity; GO:0016491,oxidoreductase activity; GO:0016614,oxidoreducta…
IFM89_028046	GO:0031969,chloroplast membrane; GO:0016021,integral component of membrane; GO:0009536,plastid; GO:0005315,inorganic phosphate transmembrane transporter activity; GO:0003674,molecular_function; GO:0005215,transporter activity; GO:0015291,secondary active transmembrane transporter activity; GO:0015318,inorganic molecular entity transmembrane transporter activity; GO:0022804,active transmembrane tr…
IFM89_029491	GO:0000380,alternative mRNA splicing, via spliceosome; GO:0000375,RNA splicing, via transesterification reactions; GO:0000377,RNA splicing, via transesterification reactions with bulged adenosine as nucleophile; GO:0000398,mRNA splicing, via spliceosome; GO:0006139,nucleobase-containing compound metabolic process; GO:0006396,RNA processing; GO:0006397,mRNA processing; GO:0006725,cellular aromatic…
IFM89_031362	GO:0009507,chloroplast; GO:0009941,chloroplast envelope; GO:0009534,chloroplast thylakoid; GO:0009535,chloroplast thylakoid membrane; GO:0005829,cytosol; GO:0016021,integral component of membrane; GO:0009522,photosystem I; GO:0009579,thylakoid; GO:0016168,chlorophyll binding; GO:0046872,metal ion binding; GO:0003729,mRNA binding; GO:0019904,protein domain specific binding; GO:0009768,photosynthes…
IFM89_002216	GO:0009536,plastid; GO:0030154,cell differentiation; GO:0009908,flower development; GO:0008150,biological_process; GO:0009987,cellular process; GO:0032502,developmental process; GO:0048869,cellular developmental process; GO:0000003,reproduction; GO:0003006,developmental process involved in reproduction; GO:0007275,multicellular organism development; GO:0009791,post-embryonic development; GO:00224…
IFM89_032358	GO:0016829,lyase activity; GO:0009820,alkaloid metabolic process; GO:0006952,defense response; GO:0003674,molecular_function; GO:0003824,catalytic activity; GO:0006807,nitrogen compound metabolic process; GO:0008150,biological_process; GO:0008152,metabolic process; GO:0071704,organic substance metabolic process; GO:1901564,organonitrogen compound metabolic process; GO:0006950,response to stress; …
IFM89_028493	GO:0005737,cytoplasm; GO:0005874,microtubule; GO:0005525,GTP binding; GO:0005200,structural constituent of cytoskeleton; GO:0000226,microtubule cytoskeleton organization; GO:0007017,microtubule-based process; GO:0000278,mitotic cell cycle; GO:0009741,response to brassinosteroid; GO:0090378,seed trichome elongation; GO:0000166,nucleotide binding; GO:0003674,molecular_function; GO:0005488,binding; …
IFM89_036388	GO:0010494,cytoplasmic stress granule; GO:0003729,mRNA binding; GO:0003723,RNA binding; GO:0034063,stress granule assembly; GO:0003674,molecular_function; GO:0003676,nucleic acid binding; GO:0005488,binding; GO:0097159,organic cyclic compound binding; GO:1901363,heterocyclic compound binding; GO:0006996,organelle organization; GO:0008150,biological_process; GO:0009987,cellular process; GO:0016043…
IFM89_003477	GO:0008289,lipid binding; GO:0006869,lipid transport; GO:0003674,molecular_function; GO:0005488,binding; GO:0006810,transport; GO:0008150,biological_process; GO:0010876,lipid localization; GO:0033036,macromolecule localization; GO:0051179,localization; GO:0051234,establishment of localization; GO:0071702,organic substance transport
IFM89_032621	GO:0016747,acyltransferase activity, transferring groups other than amino-acyl groups; GO:0047172,shikimate O-hydroxycinnamoyltransferase activity; GO:0003674,molecular_function; GO:0003824,catalytic activity; GO:0016740,transferase activity; GO:0016746,acyltransferase activity; GO:0008374,O-acyltransferase activity; GO:0050734,hydroxycinnamoyltransferase activity; GO:0050737,O-hydroxycinnamoyltr…
IFM89_008135	GO:0016021,integral component of membrane; GO:0016020,membrane; GO:0015079,potassium ion transmembrane transporter activity; GO:0006813,potassium ion transport; GO:0003674,molecular_function; GO:0005215,transporter activity; GO:0008324,cation transmembrane transporter activity; GO:0015075,ion transmembrane transporter activity; GO:0015318,inorganic molecular entity transmembrane transporter activ…
novel.5968	GO:0009707,chloroplast outer membrane; GO:0005829,cytosol; GO:0016021,integral component of membrane; GO:0005739,mitochondrion; GO:0005524,ATP binding; GO:0008865,fructokinase activity; GO:0004340,glucokinase activity; GO:0005536,glucose binding; GO:0046835,carbohydrate phosphorylation; GO:0001678,cellular glucose homeostasis; GO:0051156,glucose 6-phosphate metabolic process; GO:0006006,glucose m…
IFM89_030899	GO:0005634,nucleus; GO:0003677,DNA binding; GO:0003700,DNA-binding transcription factor activity; GO:0046872,metal ion binding; GO:0009908,flower development; GO:0003674,molecular_function; GO:0003676,nucleic acid binding; GO:0005488,binding; GO:0097159,organic cyclic compound binding; GO:1901363,heterocyclic compound binding; GO:0140110,transcription regulator activity; GO:0043167,ion binding; G…
IFM89_003157	GO:0020037,heme binding; GO:0046872,metal ion binding; GO:0019825,oxygen binding; GO:0006631,fatty acid metabolic process; GO:0019432,triglyceride biosynthetic process; GO:0003674,molecular_function; GO:0005488,binding; GO:0046906,tetrapyrrole binding; GO:0097159,organic cyclic compound binding; GO:1901363,heterocyclic compound binding; GO:0043167,ion binding; GO:0043169,cation binding; GO:003609…
IFM89_024081	GO:0005768,endosome; GO:0010941,regulation of cell death; GO:1904350,regulation of protein catabolic process in the vacuole; GO:0034976,response to endoplasmic reticulum stress; GO:1902074,response to salt; GO:0008150,biological_process; GO:0008219,cell death; GO:0009987,cellular process; GO:0050789,regulation of biological process; GO:0050794,regulation of cellular process; GO:0065007,biological…
IFM89_028379	GO:0016021,integral component of membrane; GO:0005575,cellular_component; GO:0016020,membrane; GO:0031224,intrinsic component of membrane; GO:0110165,cellular anatomical entity
IFM89_025887	GO:0031225,anchored component of membrane; GO:0005886,plasma membrane; GO:0007186,G protein-coupled receptor signaling pathway; GO:0007154,cell communication; GO:0007165,signal transduction; GO:0008150,biological_process; GO:0009987,cellular process; GO:0023052,signaling; GO:0050789,regulation of biological process; GO:0050794,regulation of cellular process; GO:0050896,response to stimulus; GO:00…
IFM89_037084	GO:0005789,endoplasmic reticulum membrane; GO:0016021,integral component of membrane; GO:0009506,plasmodesma; GO:0042802,identical protein binding; GO:0005249,voltage-gated potassium channel activity; GO:0034765,regulation of ion transmembrane transport; GO:0042391,regulation of membrane potential; GO:0009737,response to abscisic acid; GO:0003674,molecular_function; GO:0005488,binding; GO:0005515…
IFM89_028473	GO:0005524,ATP binding; GO:0106310,protein serine kinase activity; GO:0004674,protein serine/threonine kinase activity; GO:0006468,protein phosphorylation; GO:0007165,signal transduction; GO:0000166,nucleotide binding; GO:0003674,molecular_function; GO:0005488,binding; GO:0017076,purine nucleotide binding; GO:0030554,adenyl nucleotide binding; GO:0032553,ribonucleotide binding; GO:0032555,purine …
IFM89_038635	GO:0005829,cytosol; GO:0022626,cytosolic ribosome; GO:0022627,cytosolic small ribosomal subunit; GO:0005730,nucleolus; GO:0005634,nucleus; GO:0009505,plant-type cell wall; GO:0000325,plant-type vacuole; GO:0005886,plasma membrane; GO:0009506,plasmodesma; GO:0015935,small ribosomal subunit; GO:0003729,mRNA binding; GO:0019843,rRNA binding; GO:0003735,structural constituent of ribosome; GO:0006413,…
IFM89_035694	GO:0005634,nucleus; GO:0005575,cellular_component; GO:0005622,intracellular anatomical structure; GO:0043226,organelle; GO:0043227,membrane-bounded organelle; GO:0043229,intracellular organelle; GO:0043231,intracellular membrane-bounded organelle; GO:0110165,cellular anatomical entity
IFM89_032873	GO:0005737,cytoplasm; GO:0009908,flower development; GO:0010228,vegetative to reproductive phase transition of meristem; GO:0000003,reproduction; GO:0003006,developmental process involved in reproduction; GO:0007275,multicellular organism development; GO:0008150,biological_process; GO:0009791,post-embryonic development; GO:0022414,reproductive process; GO:0032501,multicellular organismal process;…
IFM89_013632	GO:0005576,extracellular region; GO:0005575,cellular_component; GO:0110165,cellular anatomical entity
IFM89_006133	GO:0005737,cytoplasm; GO:0005524,ATP binding; GO:0016301,kinase activity; GO:0000287,magnesium ion binding; GO:0004749,ribose phosphate diphosphokinase activity; GO:0009165,nucleotide biosynthetic process; GO:0016310,phosphorylation; GO:0000166,nucleotide binding; GO:0003674,molecular_function; GO:0005488,binding; GO:0017076,purine nucleotide binding; GO:0030554,adenyl nucleotide binding; GO:0032…
IFM89_024273	GO:0005794,Golgi apparatus; GO:0000138,Golgi trans cisterna; GO:0016021,integral component of membrane; GO:0016757,glycosyltransferase activity; GO:0003674,molecular_function; GO:0003824,catalytic activity; GO:0016740,transferase activity; GO:0005575,cellular_component; GO:0005622,intracellular anatomical structure; GO:0005737,cytoplasm; GO:0012505,endomembrane system; GO:0043226,organelle; GO:00…
IFM89_010142	GO:0016021,integral component of membrane; GO:0005575,cellular_component; GO:0016020,membrane; GO:0031224,intrinsic component of membrane; GO:0110165,cellular anatomical entity
IFM89_022087	GO:0005768,endosome; GO:0010941,regulation of cell death; GO:1904350,regulation of protein catabolic process in the vacuole; GO:0034976,response to endoplasmic reticulum stress; GO:1902074,response to salt; GO:0008150,biological_process; GO:0008219,cell death; GO:0009987,cellular process; GO:0050789,regulation of biological process; GO:0050794,regulation of cellular process; GO:0065007,biological…
IFM89_009935	GO:0005576,extracellular region; GO:0016747,acyltransferase activity, transferring groups other than amino-acyl groups; GO:0004185,serine-type carboxypeptidase activity; GO:0006508,proteolysis; GO:0019748,secondary metabolic process; GO:0003674,molecular_function; GO:0003824,catalytic activity; GO:0016740,transferase activity; GO:0016746,acyltransferase activity; GO:0004180,carboxypeptidase activ…
IFM89_035777	GO:0005737,cytoplasm; GO:0005829,cytosol; GO:0005794,Golgi apparatus; GO:0005739,mitochondrion; GO:0005634,nucleus; GO:0009505,plant-type cell wall; GO:0000325,plant-type vacuole; GO:0005886,plasma membrane; GO:0005524,ATP binding; GO:0016887,ATP hydrolysis activity; GO:0140662,ATP-dependent protein folding chaperone; GO:0031072,heat shock protein binding; GO:0051787,misfolded protein binding; GO…
IFM89_015292	GO:0005576,extracellular region; GO:0004185,serine-type carboxypeptidase activity; GO:0006508,proteolysis; GO:0003674,molecular_function; GO:0003824,catalytic activity; GO:0004180,carboxypeptidase activity; GO:0008233,peptidase activity; GO:0008236,serine-type peptidase activity; GO:0008238,exopeptidase activity; GO:0016787,hydrolase activity; GO:0017171,serine hydrolase activity; GO:0070008,seri…
IFM89_015947	GO:0009507,chloroplast; GO:0005829,cytosol; GO:0009536,plastid; GO:0046872,metal ion binding; GO:0003674,molecular_function; GO:0005488,binding; GO:0043167,ion binding; GO:0043169,cation binding; GO:0005575,cellular_component; GO:0005622,intracellular anatomical structure; GO:0005737,cytoplasm; GO:0043226,organelle; GO:0043227,membrane-bounded organelle; GO:0043229,intracellular organelle; GO:004…
IFM89_023538	GO:0005794,Golgi apparatus; GO:0000139,Golgi membrane; GO:0016021,integral component of membrane; GO:0016757,glycosyltransferase activity; GO:0042803,protein homodimerization activity; GO:0071555,cell wall organization; GO:0099402,plant organ development; GO:0048868,pollen tube development; GO:0003674,molecular_function; GO:0003824,catalytic activity; GO:0016740,transferase activity; GO:0005488,b…
IFM89_022359	GO:0009535,chloroplast thylakoid membrane; GO:0016021,integral component of membrane; GO:0010287,plastoglobule; GO:0005524,ATP binding; GO:0004672,protein kinase activity; GO:0106310,protein serine kinase activity; GO:0004674,protein serine/threonine kinase activity; GO:0034599,cellular response to oxidative stress; GO:0055072,iron ion homeostasis; GO:0046467,membrane lipid biosynthetic process; …
IFM89_003079	GO:0016277,[myelin basic protein]-arginine N-methyltransferase activity; GO:0008469,histone-arginine N-methyltransferase activity; GO:0035242,protein-arginine omega-N asymmetric methyltransferase activity; GO:0035241,protein-arginine omega-N monomethyltransferase activity; GO:0019919,peptidyl-arginine methylation, to asymmetrical-dimethyl arginine; GO:0010228,vegetative to reproductive phase tran…
IFM89_015471	GO:0005737,cytoplasm; GO:0010494,cytoplasmic stress granule; GO:0005634,nucleus; GO:0003700,DNA-binding transcription factor activity; GO:0000976,transcription cis-regulatory region binding; GO:0071452,cellular response to singlet oxygen; GO:0009631,cold acclimation; GO:1900055,regulation of leaf senescence; GO:0006355,regulation of DNA-templated transcription; GO:0009644,response to high light i…
IFM89_013501	GO:0005829,cytosol; GO:0005634,nucleus; GO:0005886,plasma membrane; GO:0036377,arbuscular mycorrhizal association; GO:0010035,response to inorganic substance; GO:0009610,response to symbiotic fungus; GO:0008150,biological_process; GO:0044403,biological process involved in symbiotic interaction; GO:0044419,biological process involved in interspecies interaction between organisms; GO:0042221,respon…
IFM89_001246	GO:0005576,extracellular region; GO:0020037,heme binding; GO:0046872,metal ion binding; GO:0004601,peroxidase activity; GO:0042744,hydrogen peroxide catabolic process; GO:0006979,response to oxidative stress; GO:0003674,molecular_function; GO:0005488,binding; GO:0046906,tetrapyrrole binding; GO:0097159,organic cyclic compound binding; GO:1901363,heterocyclic compound binding; GO:0043167,ion bindi…
novel.6536	GO:0000307,cyclin-dependent protein kinase holoenzyme complex; GO:0005737,cytoplasm; GO:0005634,nucleus; GO:0009524,phragmoplast; GO:0005819,spindle; GO:0005524,ATP binding; GO:0030332,cyclin binding; GO:0004693,cyclin-dependent protein serine/threonine kinase activity; GO:0106310,protein serine kinase activity; GO:0008353,RNA polymerase II CTD heptapeptide repeat kinase activity; GO:0051301,cell…
IFM89_013226	GO:0071013,catalytic step 2 spliceosome; GO:0005737,cytoplasm; GO:0005730,nucleolus; GO:0005524,ATP binding; GO:0016887,ATP hydrolysis activity; GO:0003729,mRNA binding; GO:0003723,RNA binding; GO:0003724,RNA helicase activity; GO:0006397,mRNA processing; GO:0051028,mRNA transport; GO:0000184,nuclear-transcribed mRNA catabolic process, nonsense-mediated decay; GO:0006417,regulation of translation…
IFM89_023849	GO:0009570,chloroplast stroma; GO:0030604,1-deoxy-D-xylulose-5-phosphate reductoisomerase activity; GO:0030145,manganese ion binding; GO:0070402,NADPH binding; GO:0051484,isopentenyl diphosphate biosynthetic process, methylerythritol 4-phosphate pathway involved in terpenoid biosynthetic process; GO:0003674,molecular_function; GO:0003824,catalytic activity; GO:0016491,oxidoreductase activity; GO:…
IFM89_019387	GO:0016021,integral component of membrane; GO:0005886,plasma membrane; GO:0005524,ATP binding; GO:0106310,protein serine kinase activity; GO:0004674,protein serine/threonine kinase activity; GO:0006468,protein phosphorylation; GO:0000166,nucleotide binding; GO:0003674,molecular_function; GO:0005488,binding; GO:0017076,purine nucleotide binding; GO:0030554,adenyl nucleotide binding; GO:0032553,rib…
IFM89_014433	GO:0005737,cytoplasm; GO:0016881,acid-amino acid ligase activity; GO:0010279,indole-3-acetic acid amido synthetase activity; GO:0010252,auxin homeostasis; GO:0010120,camalexin biosynthetic process; GO:1901183,positive regulation of camalexin biosynthetic process; GO:0009733,response to auxin; GO:0003674,molecular_function; GO:0003824,catalytic activity; GO:0016874,ligase activity; GO:0016879,liga…
IFM89_021689	GO:0005829,cytosol; GO:0005634,nucleus; GO:0030544,Hsp70 protein binding; GO:0051879,Hsp90 protein binding; GO:0070678,preprotein binding; GO:0051131,chaperone-mediated protein complex assembly; GO:0006457,protein folding; GO:0046686,response to cadmium ion; GO:0003674,molecular_function; GO:0005488,binding; GO:0005515,protein binding; GO:0031072,heat shock protein binding; GO:0008150,biological_…
novel.8281	GO:0003676,nucleic acid binding; GO:0003674,molecular_function; GO:0005488,binding; GO:0097159,organic cyclic compound binding; GO:1901363,heterocyclic compound binding
novel.3923	GO:0005829,cytosol; GO:0004032,alditol:NADP+ 1-oxidoreductase activity; GO:0003674,molecular_function; GO:0003824,catalytic activity; GO:0004033,aldo-keto reductase (NADP) activity; GO:0008106,alcohol dehydrogenase (NADP+) activity; GO:0016491,oxidoreductase activity; GO:0016614,oxidoreductase activity, acting on CH-OH group of donors; GO:0016616,oxidoreductase activity, acting on the CH-OH group…
IFM89_027904	GO:0009507,chloroplast; GO:0005829,cytosol; GO:0005739,mitochondrion; GO:0005634,nucleus; GO:0005524,ATP binding; GO:0005507,copper ion binding; GO:0016631,enoyl-[acyl-carrier-protein] reductase activity; GO:0019166,trans-2-enoyl-CoA reductase (NADPH) activity; GO:0006633,fatty acid biosynthetic process; GO:0006631,fatty acid metabolic process; GO:0000166,nucleotide binding; GO:0003674,molecular_…
IFM89_010483	GO:0008061,chitin binding; GO:0004568,chitinase activity; GO:0016998,cell wall macromolecule catabolic process; GO:0006032,chitin catabolic process; GO:0006952,defense response; GO:0000272,polysaccharide catabolic process; GO:0009617,response to bacterium; GO:0009611,response to wounding; GO:0010262,somatic embryogenesis; GO:0003674,molecular_function; GO:0005488,binding; GO:0097367,carbohydrate …
novel.8909	GO:0003700,DNA-binding transcription factor activity; GO:0003674,molecular_function; GO:0140110,transcription regulator activity
IFM89_011831	GO:0005947,mitochondrial alpha-ketoglutarate dehydrogenase complex; GO:0003863,3-methyl-2-oxobutanoate dehydrogenase (2-methylpropanoyl-transferring) activity; GO:0009083,branched-chain amino acid catabolic process; GO:0007584,response to nutrient; GO:0003674,molecular_function; GO:0003824,catalytic activity; GO:0016491,oxidoreductase activity; GO:0016624,oxidoreductase activity, acting on the al…
IFM89_012322	GO:0009507,chloroplast; GO:0005871,kinesin complex; GO:0005874,microtubule; GO:0005524,ATP binding; GO:0016887,ATP hydrolysis activity; GO:0008017,microtubule binding; GO:0003777,microtubule motor activity; GO:0007018,microtubule-based movement; GO:0000166,nucleotide binding; GO:0003674,molecular_function; GO:0005488,binding; GO:0017076,purine nucleotide binding; GO:0030554,adenyl nucleotide bind…
IFM89_031703	GO:0009507,chloroplast; GO:0033730,arogenate dehydrogenase (NADP+) activity; GO:0008977,prephenate dehydrogenase (NAD+) activity; GO:0004665,prephenate dehydrogenase (NADP+) activity; GO:0006571,tyrosine biosynthetic process; GO:0003674,molecular_function; GO:0003824,catalytic activity; GO:0016491,oxidoreductase activity; GO:0016627,oxidoreductase activity, acting on the CH-CH group of donors; GO…
IFM89_017136	GO:0009570,chloroplast stroma; GO:0005737,cytoplasm; GO:0009505,plant-type cell wall; GO:0009536,plastid; GO:0009532,plastid stroma; GO:0004044,amidophosphoribosyltransferase activity; GO:0051536,iron-sulfur cluster binding; GO:0046872,metal ion binding; GO:0006189,'de novo' IMP biosynthetic process; GO:0006541,glutamine metabolic process; GO:0009113,purine nucleobase biosynthetic process; GO:000…
IFM89_034605	GO:0110165,cellular anatomical entity; GO:0046872,metal ion binding; GO:0017018,myosin phosphatase activity; GO:0006470,protein dephosphorylation; GO:0003674,molecular_function; GO:0005488,binding; GO:0043167,ion binding; GO:0043169,cation binding; GO:0003824,catalytic activity; GO:0004721,phosphoprotein phosphatase activity; GO:0004722,protein serine/threonine phosphatase activity; GO:0016787,hy…
IFM89_015984	GO:0016021,integral component of membrane; GO:0045330,aspartyl esterase activity; GO:0030599,pectinesterase activity; GO:0046910,pectinesterase inhibitor activity; GO:0042545,cell wall modification; GO:0045490,pectin catabolic process; GO:0003674,molecular_function; GO:0003824,catalytic activity; GO:0016787,hydrolase activity; GO:0016788,hydrolase activity, acting on ester bonds; GO:0052689,carbo…
IFM89_023082	GO:0009535,chloroplast thylakoid membrane; GO:0016021,integral component of membrane; GO:0009538,photosystem I reaction center; GO:0015979,photosynthesis; GO:0008150,biological_process; GO:0008152,metabolic process; GO:0009987,cellular process; GO:0044237,cellular metabolic process; GO:0005575,cellular_component; GO:0005622,intracellular anatomical structure; GO:0005737,cytoplasm; GO:0009507,chlo…
IFM89_021832	GO:0005737,cytoplasm; GO:0005634,nucleus; GO:0003700,DNA-binding transcription factor activity; GO:0043565,sequence-specific DNA binding; GO:0000976,transcription cis-regulatory region binding; GO:1990110,callus formation; GO:0009640,photomorphogenesis; GO:0009585,red, far-red light phototransduction; GO:0006355,regulation of DNA-templated transcription; GO:0003674,molecular_function; GO:0140110,…
IFM89_038130	GO:0005789,endoplasmic reticulum membrane; GO:0019898,extrinsic component of membrane; GO:0000407,phagophore assembly site; GO:0034045,phagophore assembly site membrane; GO:0032266,phosphatidylinositol-3-phosphate binding; GO:0000045,autophagosome assembly; GO:0000422,autophagy of mitochondrion; GO:0030242,autophagy of peroxisome; GO:0042742,defense response to bacterium; GO:0050832,defense respo…
IFM89_030232	GO:0016607,nuclear speck; GO:0005681,spliceosomal complex; GO:0042802,identical protein binding; GO:0003729,mRNA binding; GO:0003723,RNA binding; GO:0008270,zinc ion binding; GO:0000398,mRNA splicing, via spliceosome; GO:0003674,molecular_function; GO:0005488,binding; GO:0005515,protein binding; GO:0003676,nucleic acid binding; GO:0097159,organic cyclic compound binding; GO:1901363,heterocyclic c…
IFM89_005390	GO:0005634,nucleus; GO:0003700,DNA-binding transcription factor activity; GO:0000981,DNA-binding transcription factor activity, RNA polymerase II-specific; GO:0042803,protein homodimerization activity; GO:0043565,sequence-specific DNA binding; GO:0009965,leaf morphogenesis; GO:0017148,negative regulation of translation; GO:0045893,positive regulation of DNA-templated transcription; GO:0009637,res…
IFM89_020960	GO:0030267,glyoxylate reductase (NADP+) activity; GO:0016618,hydroxypyruvate reductase activity; GO:0051287,NAD binding; GO:0009854,oxidative photosynthetic carbon pathway; GO:0009853,photorespiration; GO:0003674,molecular_function; GO:0003824,catalytic activity; GO:0016491,oxidoreductase activity; GO:0016614,oxidoreductase activity, acting on CH-OH group of donors; GO:0016616,oxidoreductase acti…
IFM89_014890	GO:0005634,nucleus; GO:0003700,DNA-binding transcription factor activity; GO:0000981,DNA-binding transcription factor activity, RNA polymerase II-specific; GO:0000978,RNA polymerase II cis-regulatory region sequence-specific DNA binding; GO:0010229,inflorescence development; GO:0080006,internode patterning; GO:0010076,maintenance of floral meristem identity; GO:0010077,maintenance of inflorescenc…
IFM89_034949	GO:0048046,apoplast; GO:0071555,cell wall organization; GO:0009835,fruit ripening; GO:0008150,biological_process; GO:0009987,cellular process; GO:0016043,cellular component organization; GO:0045229,external encapsulating structure organization; GO:0071554,cell wall organization or biogenesis; GO:0071840,cellular component organization or biogenesis; GO:0000003,reproduction; GO:0003006,development…
IFM89_014909	GO:0005737,cytoplasm; GO:0005874,microtubule; GO:0005525,GTP binding; GO:0005200,structural constituent of cytoskeleton; GO:0007017,microtubule-based process; GO:0000166,nucleotide binding; GO:0003674,molecular_function; GO:0005488,binding; GO:0017076,purine nucleotide binding; GO:0019001,guanyl nucleotide binding; GO:0032553,ribonucleotide binding; GO:0032555,purine ribonucleotide binding; GO:00…
IFM89_022005	GO:0005634,nucleus; GO:0003677,DNA binding; GO:0003700,DNA-binding transcription factor activity; GO:0043565,sequence-specific DNA binding; GO:0000976,transcription cis-regulatory region binding; GO:0071472,cellular response to salt stress; GO:0009736,cytokinin-activated signaling pathway; GO:0009873,ethylene-activated signaling pathway; GO:0045595,regulation of cell differentiation; GO:0009409,r…
IFM89_034447	GO:0005737,cytoplasm; GO:0005634,nucleus; GO:0000151,ubiquitin ligase complex; GO:0061630,ubiquitin protein ligase activity; GO:0034450,ubiquitin-ubiquitin ligase activity; GO:0000209,protein polyubiquitination; GO:0016567,protein ubiquitination; GO:0030433,ubiquitin-dependent ERAD pathway; GO:0006511,ubiquitin-dependent protein catabolic process; GO:0003674,molecular_function; GO:0003824,catalyt…
IFM89_023698	GO:0009055,electron transfer activity; GO:0046872,metal ion binding; GO:0003674,molecular_function; GO:0003824,catalytic activity; GO:0016491,oxidoreductase activity; GO:0005488,binding; GO:0043167,ion binding; GO:0043169,cation binding
IFM89_035319	GO:0048046,apoplast; GO:0004553,hydrolase activity, hydrolyzing O-glycosyl compounds; GO:0030247,polysaccharide binding; GO:0016762,xyloglucan:xyloglucosyl transferase activity; GO:0042546,cell wall biogenesis; GO:0071555,cell wall organization; GO:0009414,response to water deprivation; GO:0010411,xyloglucan metabolic process; GO:0003674,molecular_function; GO:0003824,catalytic activity; GO:00167…
IFM89_017332	GO:0005634,nucleus; GO:0000151,ubiquitin ligase complex; GO:0097602,cullin family protein binding; GO:0031624,ubiquitin conjugating enzyme binding; GO:0032182,ubiquitin-like protein binding; GO:0009734,auxin-activated signaling pathway; GO:0051443,positive regulation of ubiquitin-protein transferase activity; GO:0045116,protein neddylation; GO:0003674,molecular_function; GO:0005488,binding; GO:00…
IFM89_012661	GO:0005634,nucleus; GO:0019185,snRNA-activating protein complex; GO:0003681,bent DNA binding; GO:0001006,RNA polymerase III type 3 promoter sequence-specific DNA binding; GO:0009926,auxin polar transport; GO:0009734,auxin-activated signaling pathway; GO:0060184,cell cycle switching; GO:0043697,cell dedifferentiation; GO:0071365,cellular response to auxin stimulus; GO:0071368,cellular response to …
IFM89_009248	GO:0005783,endoplasmic reticulum; GO:0016020,membrane; GO:0005524,ATP binding; GO:0030544,Hsp70 protein binding; GO:0046872,metal ion binding; GO:0051082,unfolded protein binding; GO:0006457,protein folding; GO:0009408,response to heat; GO:0000166,nucleotide binding; GO:0003674,molecular_function; GO:0005488,binding; GO:0017076,purine nucleotide binding; GO:0030554,adenyl nucleotide binding; GO:0…
novel.7781	GO:0005856,cytoskeleton; GO:0005789,endoplasmic reticulum membrane; GO:0000139,Golgi membrane; GO:0008092,cytoskeletal protein binding; GO:0009958,positive gravitropism; GO:0003674,molecular_function; GO:0005488,binding; GO:0005515,protein binding; GO:0008150,biological_process; GO:0009605,response to external stimulus; GO:0009606,tropism; GO:0009628,response to abiotic stimulus; GO:0009629,respo…
IFM89_012794	GO:0005634,nucleus; GO:0000932,P-body; GO:0005697,telomerase holoenzyme complex; GO:0070034,telomerase RNA binding; GO:0042162,telomeric DNA binding; GO:0006952,defense response; GO:0051321,meiotic cell cycle; GO:0090306,meiotic spindle assembly; GO:0060548,negative regulation of cell death; GO:0000184,nuclear-transcribed mRNA catabolic process, nonsense-mediated decay; GO:0012501,programmed cell…
IFM89_010524	GO:0005737,cytoplasm; GO:0005634,nucleus; GO:0000974,Prp19 complex; GO:0071006,U2-type catalytic step 1 spliceosome; GO:0061630,ubiquitin protein ligase activity; GO:0004842,ubiquitin-protein transferase activity; GO:0006281,DNA repair; GO:0045087,innate immune response; GO:0000398,mRNA splicing, via spliceosome; GO:0070534,protein K63-linked ubiquitination; GO:0016567,protein ubiquitination; GO:…
novel.7059	GO:0005634,nucleus; GO:0000502,proteasome complex; GO:0008541,proteasome regulatory particle, lid subcomplex; GO:0070122,NA; GO:0061578,Lys63-specific deubiquitinase activity; GO:0046872,metal ion binding; GO:0140492,metal-dependent deubiquitinase activity; GO:0008237,metallopeptidase activity; GO:0070628,proteasome binding; GO:0043161,proteasome-mediated ubiquitin-dependent protein catabolic pro…
novel.280	GO:0000307,cyclin-dependent protein kinase holoenzyme complex; GO:0005737,cytoplasm; GO:0005634,nucleus; GO:0016538,cyclin-dependent protein serine/threonine kinase regulator activity; GO:0051301,cell division; GO:0044772,mitotic cell cycle phase transition; GO:0000079,regulation of cyclin-dependent protein serine/threonine kinase activity; GO:0003674,molecular_function; GO:0019207,kinase regulat…
IFM89_003670	GO:0005829,cytosol; GO:0005730,nucleolus; GO:0005634,nucleus; GO:0009506,plasmodesma; GO:0005524,ATP binding; GO:0016887,ATP hydrolysis activity; GO:0003690,double-stranded DNA binding; GO:0003725,double-stranded RNA binding; GO:0003729,mRNA binding; GO:0003723,RNA binding; GO:0003724,RNA helicase activity; GO:0003727,single-stranded RNA binding; GO:0006397,mRNA processing; GO:0051028,mRNA transp…
IFM89_002814	GO:0005524,ATP binding; GO:0004672,protein kinase activity; GO:0006468,protein phosphorylation; GO:0000166,nucleotide binding; GO:0003674,molecular_function; GO:0005488,binding; GO:0017076,purine nucleotide binding; GO:0030554,adenyl nucleotide binding; GO:0032553,ribonucleotide binding; GO:0032555,purine ribonucleotide binding; GO:0032559,adenyl ribonucleotide binding; GO:0035639,purine ribonucl…
IFM89_037624	GO:0005576,extracellular region; GO:0020037,heme binding; GO:0046872,metal ion binding; GO:0004601,peroxidase activity; GO:0042744,hydrogen peroxide catabolic process; GO:0006979,response to oxidative stress; GO:0003674,molecular_function; GO:0005488,binding; GO:0046906,tetrapyrrole binding; GO:0097159,organic cyclic compound binding; GO:1901363,heterocyclic compound binding; GO:0043167,ion bindi…
IFM89_038128	GO:0005829,cytosol; GO:0005634,nucleus; GO:0003729,mRNA binding; GO:0043022,ribosome binding; GO:0045892,negative regulation of DNA-templated transcription; GO:0006417,regulation of translation; GO:0009646,response to absence of light; GO:0090549,response to carbon starvation; GO:0003674,molecular_function; GO:0003676,nucleic acid binding; GO:0003723,RNA binding; GO:0005488,binding; GO:0097159,or…
IFM89_038297	GO:0005634,nucleus; GO:0003700,DNA-binding transcription factor activity; GO:0046983,protein dimerization activity; GO:0043565,sequence-specific DNA binding; GO:0048658,anther wall tapetum development; GO:0006355,regulation of DNA-templated transcription; GO:0003674,molecular_function; GO:0140110,transcription regulator activity; GO:0005488,binding; GO:0005515,protein binding; GO:0003676,nucleic …
IFM89_027967	GO:0005886,plasma membrane; GO:0009506,plasmodesma; GO:0005575,cellular_component; GO:0016020,membrane; GO:0071944,cell periphery; GO:0110165,cellular anatomical entity; GO:0005911,cell-cell junction; GO:0030054,cell junction; GO:0055044,symplast; GO:0070161,anchoring junction
IFM89_004919	GO:0009507,chloroplast; GO:0009536,plastid; GO:0005524,ATP binding; GO:0002238,response to molecule of fungal origin; GO:0000166,nucleotide binding; GO:0003674,molecular_function; GO:0005488,binding; GO:0017076,purine nucleotide binding; GO:0030554,adenyl nucleotide binding; GO:0032553,ribonucleotide binding; GO:0032555,purine ribonucleotide binding; GO:0032559,adenyl ribonucleotide binding; GO:0…
IFM89_008004	GO:0000785,chromatin; GO:0005737,cytoplasm; GO:0042555,MCM complex; GO:0000347,THO complex; GO:0005524,ATP binding; GO:0016887,ATP hydrolysis activity; GO:0003677,DNA binding; GO:0003678,DNA helicase activity; GO:0007049,cell cycle; GO:0006270,DNA replication initiation; GO:0009555,pollen development; GO:0090329,regulation of DNA-templated DNA replication; GO:0000166,nucleotide binding; GO:000367…
IFM89_011459	GO:0048046,apoplast; GO:0009699,phenylpropanoid biosynthetic process; GO:0006725,cellular aromatic compound metabolic process; GO:0008150,biological_process; GO:0008152,metabolic process; GO:0009058,biosynthetic process; GO:0009698,phenylpropanoid metabolic process; GO:0009987,cellular process; GO:0019438,aromatic compound biosynthetic process; GO:0019748,secondary metabolic process; GO:0044237,c…
IFM89_023256	GO:0004842,ubiquitin-protein transferase activity; GO:0009877,nodulation; GO:0003674,molecular_function; GO:0003824,catalytic activity; GO:0016740,transferase activity; GO:0019787,ubiquitin-like protein transferase activity; GO:0140096,catalytic activity, acting on a protein; GO:0008150,biological_process; GO:0009653,anatomical structure morphogenesis; GO:0032502,developmental process; GO:0048646…
IFM89_033118	GO:0005737,cytoplasm; GO:0005634,nucleus; GO:0003677,DNA binding; GO:0003700,DNA-binding transcription factor activity; GO:0000981,DNA-binding transcription factor activity, RNA polymerase II-specific; GO:0046982,protein heterodimerization activity; GO:0042803,protein homodimerization activity; GO:0000978,RNA polymerase II cis-regulatory region sequence-specific DNA binding; GO:0010197,polar nucl…
IFM89_031301	GO:0005768,endosome; GO:0005794,Golgi apparatus; GO:0000139,Golgi membrane; GO:0000138,Golgi trans cisterna; GO:0016021,integral component of membrane; GO:0005802,trans-Golgi network; GO:0016757,glycosyltransferase activity; GO:0071555,cell wall organization; GO:0045489,pectin biosynthetic process; GO:0006486,protein glycosylation; GO:0003674,molecular_function; GO:0003824,catalytic activity; GO:…
IFM89_011088	GO:0000786,nucleosome; GO:0005634,nucleus; GO:0005524,ATP binding; GO:0016887,ATP hydrolysis activity; GO:0008094,ATP-dependent activity, acting on DNA; GO:0140658,ATP-dependent chromatin remodeler activity; GO:0003677,DNA binding; GO:0003678,DNA helicase activity; GO:0006346,DNA methylation-dependent heterochromatin formation; GO:0009294,DNA-mediated transformation; GO:0090241,negative regulatio…
IFM89_020999	GO:0005634,nucleus; GO:0005575,cellular_component; GO:0005622,intracellular anatomical structure; GO:0043226,organelle; GO:0043227,membrane-bounded organelle; GO:0043229,intracellular organelle; GO:0043231,intracellular membrane-bounded organelle; GO:0110165,cellular anatomical entity
IFM89_022662	GO:0061630,ubiquitin protein ligase activity; GO:0043161,proteasome-mediated ubiquitin-dependent protein catabolic process; GO:0000209,protein polyubiquitination; GO:0003674,molecular_function; GO:0003824,catalytic activity; GO:0004842,ubiquitin-protein transferase activity; GO:0016740,transferase activity; GO:0019787,ubiquitin-like protein transferase activity; GO:0061659,ubiquitin-like protein …
IFM89_021392	GO:0030126,COPI vesicle coat; GO:0000139,Golgi membrane; GO:0006891,intra-Golgi vesicle-mediated transport; GO:0006886,intracellular protein transport; GO:0006890,retrograde vesicle-mediated transport, Golgi to endoplasmic reticulum; GO:0006810,transport; GO:0008150,biological_process; GO:0016192,vesicle-mediated transport; GO:0048193,Golgi vesicle transport; GO:0051179,localization; GO:0051234,e…
IFM89_037108	GO:0102360,daphnetin 3-O-glucosyltransferase activity; GO:0047893,flavonol 3-O-glucosyltransferase activity; GO:0102425,myricetin 3-O-glucosyltransferase activity; GO:0003674,molecular_function; GO:0003824,catalytic activity; GO:0016740,transferase activity; GO:0016757,glycosyltransferase activity; GO:0016758,hexosyltransferase activity; GO:0008194,UDP-glycosyltransferase activity; GO:0035251,UDP…
IFM89_039960	GO:0005789,endoplasmic reticulum membrane; GO:0016021,integral component of membrane; GO:0020037,heme binding; GO:0005506,iron ion binding; GO:0004497,monooxygenase activity; GO:0016705,oxidoreductase activity, acting on paired donors, with incorporation or reduction of molecular oxygen; GO:0009835,fruit ripening; GO:0003674,molecular_function; GO:0005488,binding; GO:0046906,tetrapyrrole binding;…
novel.8453	GO:0005829,cytosol; GO:0000139,Golgi membrane; GO:0016021,integral component of membrane; GO:0006888,endoplasmic reticulum to Golgi vesicle-mediated transport; GO:0042147,retrograde transport, endosome to Golgi; GO:0006810,transport; GO:0008150,biological_process; GO:0009987,cellular process; GO:0016192,vesicle-mediated transport; GO:0046907,intracellular transport; GO:0048193,Golgi vesicle trans…
IFM89_031472	GO:0016021,integral component of membrane; GO:0016020,membrane; GO:0090447,glycerol-3-phosphate 2-O-acyltransferase activity; GO:0016791,phosphatase activity; GO:0102419,sn-2-glycerol-3-phosphate omega-OH-C22:0-CoA acyl transferase activity; GO:0010143,cutin biosynthetic process; GO:0009908,flower development; GO:0008654,phospholipid biosynthetic process; GO:0003674,molecular_function; GO:0003824…
IFM89_000130	GO:0031225,anchored component of membrane; GO:0046658,anchored component of plasma membrane; GO:0009055,electron transfer activity; GO:0046872,metal ion binding; GO:0003674,molecular_function; GO:0003824,catalytic activity; GO:0016491,oxidoreductase activity; GO:0005488,binding; GO:0043167,ion binding; GO:0043169,cation binding; GO:0005575,cellular_component; GO:0016020,membrane; GO:0031224,intri…
IFM89_000793	GO:0005737,cytoplasm; GO:0005525,GTP binding; GO:0004475,mannose-1-phosphate guanylyltransferase (GTP) activity; GO:0016779,nucleotidyltransferase activity; GO:0000032,cell wall mannoprotein biosynthetic process; GO:0009298,GDP-mannose biosynthetic process; GO:0006486,protein glycosylation; GO:0000166,nucleotide binding; GO:0003674,molecular_function; GO:0005488,binding; GO:0017076,purine nucleot…
IFM89_035088	GO:0009507,chloroplast; GO:0009570,chloroplast stroma; GO:0047769,arogenate dehydratase activity; GO:0004664,prephenate dehydratase activity; GO:0009094,L-phenylalanine biosynthetic process; GO:0003674,molecular_function; GO:0003824,catalytic activity; GO:0016829,lyase activity; GO:0016835,carbon-oxygen lyase activity; GO:0016836,hydro-lyase activity; GO:0006082,organic acid metabolic process; GO…
IFM89_015107	GO:0005634,nucleus; GO:0005575,cellular_component; GO:0005622,intracellular anatomical structure; GO:0043226,organelle; GO:0043227,membrane-bounded organelle; GO:0043229,intracellular organelle; GO:0043231,intracellular membrane-bounded organelle; GO:0110165,cellular anatomical entity
IFM89_028355	GO:0005576,extracellular region; GO:0005575,cellular_component; GO:0110165,cellular anatomical entity
IFM89_008268	GO:0005737,cytoplasm; GO:0005634,nucleus; GO:0005524,ATP binding; GO:0106310,protein serine kinase activity; GO:0004674,protein serine/threonine kinase activity; GO:0009785,blue light signaling pathway; GO:0006897,endocytosis; GO:0018105,peptidyl-serine phosphorylation; GO:0009640,photomorphogenesis; GO:0046777,protein autophosphorylation; GO:0009637,response to blue light; GO:0007165,signal tran…
IFM89_007168	GO:0005634,nucleus; GO:0003700,DNA-binding transcription factor activity; GO:1990837,sequence-specific double-stranded DNA binding; GO:0071456,cellular response to hypoxia; GO:0006952,defense response; GO:0009873,ethylene-activated signaling pathway; GO:0045893,positive regulation of DNA-templated transcription; GO:2000280,regulation of root development; GO:0034059,response to anoxia; GO:0009414,…
IFM89_007625	GO:0031305,integral component of mitochondrial inner membrane; GO:0005739,mitochondrion; GO:0009505,plant-type cell wall; GO:0000325,plant-type vacuole; GO:0005315,inorganic phosphate transmembrane transporter activity; GO:0003729,mRNA binding; GO:1990547,mitochondrial phosphate ion transmembrane transport; GO:0035435,phosphate ion transmembrane transport; GO:0009651,response to salt stress; GO:0…
IFM89_015516	GO:0016021,integral component of membrane; GO:0050660,flavin adenine dinucleotide binding; GO:0046577,long-chain-alcohol oxidase activity; GO:0000166,nucleotide binding; GO:0003674,molecular_function; GO:0005488,binding; GO:0036094,small molecule binding; GO:0043167,ion binding; GO:0043168,anion binding; GO:0097159,organic cyclic compound binding; GO:1901265,nucleoside phosphate binding; GO:19013…
IFM89_002478	GO:0016021,integral component of membrane; GO:0009506,plasmodesma; GO:0009734,auxin-activated signaling pathway; GO:0007154,cell communication; GO:0007165,signal transduction; GO:0008150,biological_process; GO:0009719,response to endogenous stimulus; GO:0009725,response to hormone; GO:0009733,response to auxin; GO:0009755,hormone-mediated signaling pathway; GO:0009987,cellular process; GO:0010033…
IFM89_018010	GO:0005737,cytoplasm; GO:0005768,endosome; GO:0005794,Golgi apparatus; GO:0000139,Golgi membrane; GO:0000138,Golgi trans cisterna; GO:0016021,integral component of membrane; GO:0000325,plant-type vacuole; GO:0005802,trans-Golgi network; GO:0008168,methyltransferase activity; GO:0032259,methylation; GO:0003674,molecular_function; GO:0003824,catalytic activity; GO:0016740,transferase activity; GO:0…
novel.635	GO:0005634,nucleus; GO:0008541,proteasome regulatory particle, lid subcomplex; GO:0030234,enzyme regulator activity; GO:0042176,regulation of protein catabolic process; GO:0006511,ubiquitin-dependent protein catabolic process; GO:0003674,molecular_function; GO:0098772,molecular function regulator activity; GO:0006807,nitrogen compound metabolic process; GO:0008150,biological_process; GO:0008152,m…
IFM89_011009	GO:0071013,catalytic step 2 spliceosome; GO:0005829,cytosol; GO:1990726,Lsm1-7-Pat1 complex; GO:0120115,Lsm2-8 complex; GO:0005634,nucleus; GO:0000932,P-body; GO:1990904,ribonucleoprotein complex; GO:0097526,spliceosomal tri-snRNP complex; GO:0005689,U12-type spliceosomal complex; GO:0071004,U2-type prespliceosome; GO:0005688,U6 snRNP; GO:0003723,RNA binding; GO:0000290,deadenylation-dependent de…
IFM89_003542	GO:0005634,nucleus; GO:0003700,DNA-binding transcription factor activity; GO:0046983,protein dimerization activity; GO:0043565,sequence-specific DNA binding; GO:0000976,transcription cis-regulatory region binding; GO:0006952,defense response; GO:0045893,positive regulation of DNA-templated transcription; GO:0040008,regulation of growth; GO:0006355,regulation of DNA-templated transcription; GO:000…
IFM89_014579	GO:0005615,extracellular space; GO:0005886,plasma membrane; GO:0048530,fruit morphogenesis; GO:0010199,organ boundary specification between lateral organs and the meristem; GO:0009416,response to light stimulus; GO:0000003,reproduction; GO:0003006,developmental process involved in reproduction; GO:0007275,multicellular organism development; GO:0008150,biological_process; GO:0009653,anatomical str…
IFM89_024163	GO:0005783,endoplasmic reticulum; GO:0016021,integral component of membrane; GO:0005886,plasma membrane; GO:0005249,voltage-gated potassium channel activity; GO:0071805,potassium ion transmembrane transport; GO:0034765,regulation of ion transmembrane transport; GO:0009624,response to nematode; GO:0003674,molecular_function; GO:0005215,transporter activity; GO:0005216,ion channel activity; GO:0005…
IFM89_018822	GO:0005783,endoplasmic reticulum; GO:0042406,extrinsic component of endoplasmic reticulum membrane; GO:0016021,integral component of membrane; GO:1990604,IRE1-TRAF2-ASK1 complex; GO:0099503,secretory vesicle; GO:0005524,ATP binding; GO:0004521,endoribonuclease activity; GO:0046872,metal ion binding; GO:0106310,protein serine kinase activity; GO:0004674,protein serine/threonine kinase activity; GO…
IFM89_008893	GO:0005524,ATP binding; GO:0106310,protein serine kinase activity; GO:0004674,protein serine/threonine kinase activity; GO:0035556,intracellular signal transduction; GO:0006468,protein phosphorylation; GO:0000166,nucleotide binding; GO:0003674,molecular_function; GO:0005488,binding; GO:0017076,purine nucleotide binding; GO:0030554,adenyl nucleotide binding; GO:0032553,ribonucleotide binding; GO:0…
novel.7491	GO:0003676,nucleic acid binding; GO:0004523,RNA-DNA hybrid ribonuclease activity; GO:0003674,molecular_function; GO:0005488,binding; GO:0097159,organic cyclic compound binding; GO:1901363,heterocyclic compound binding; GO:0003824,catalytic activity; GO:0004518,nuclease activity; GO:0004519,endonuclease activity; GO:0004521,endoribonuclease activity; GO:0004540,ribonuclease activity; GO:0016787,hy…
novel.8400	GO:0016021,integral component of membrane; GO:0005575,cellular_component; GO:0016020,membrane; GO:0031224,intrinsic component of membrane; GO:0110165,cellular anatomical entity
IFM89_017732	GO:0016021,integral component of membrane; GO:0005575,cellular_component; GO:0016020,membrane; GO:0031224,intrinsic component of membrane; GO:0110165,cellular anatomical entity
IFM89_036204	GO:0005677,chromatin silencing complex; GO:0005634,nucleus; GO:0031519,PcG protein complex; GO:0003682,chromatin binding; GO:0046976,histone methyltransferase activity (H3-K27 specific); GO:0003727,single-stranded RNA binding; GO:1990110,callus formation; GO:0030154,cell differentiation; GO:0006338,chromatin remodeling; GO:0009294,DNA-mediated transformation; GO:0009908,flower development; GO:003…
IFM89_037642	GO:0005737,cytoplasm; GO:0005789,endoplasmic reticulum membrane; GO:0016021,integral component of membrane; GO:0008168,methyltransferase activity; GO:0032259,methylation; GO:0003674,molecular_function; GO:0003824,catalytic activity; GO:0016740,transferase activity; GO:0016741,transferase activity, transferring one-carbon groups; GO:0008150,biological_process; GO:0008152,metabolic process; GO:0005…
IFM89_013937	GO:0005773,vacuole; GO:0019139,cytokinin dehydrogenase activity; GO:0071949,FAD binding; GO:0016491,oxidoreductase activity; GO:0009823,cytokinin catabolic process; GO:0048507,meristem development; GO:0003674,molecular_function; GO:0003824,catalytic activity; GO:0016645,oxidoreductase activity, acting on the CH-NH group of donors; GO:0000166,nucleotide binding; GO:0005488,binding; GO:0036094,smal…
IFM89_016978	GO:0050474,(S)-norcoclaurine synthase activity; GO:0009820,alkaloid metabolic process; GO:0006952,defense response; GO:0003674,molecular_function; GO:0003824,catalytic activity; GO:0016829,lyase activity; GO:0016835,carbon-oxygen lyase activity; GO:0016836,hydro-lyase activity; GO:0006807,nitrogen compound metabolic process; GO:0008150,biological_process; GO:0008152,metabolic process; GO:0071704,…
novel.8291	GO:0009507,chloroplast; GO:0005634,nucleus; GO:0004693,cyclin-dependent protein serine/threonine kinase activity; GO:0003677,DNA binding; GO:0070182,DNA polymerase binding; GO:0019901,protein kinase binding; GO:0009658,chloroplast organization; GO:0051276,chromosome organization; GO:0006260,DNA replication; GO:0000076,DNA replication checkpoint signaling; GO:0071163,DNA replication preinitiation …
IFM89_020854	GO:0030246,carbohydrate binding; GO:0016853,isomerase activity; GO:0019318,hexose metabolic process; GO:0003674,molecular_function; GO:0005488,binding; GO:0003824,catalytic activity; GO:0005975,carbohydrate metabolic process; GO:0005996,monosaccharide metabolic process; GO:0008150,biological_process; GO:0008152,metabolic process; GO:0044238,primary metabolic process; GO:0044281,small molecule met…
novel.2508	GO:0005773,vacuole; GO:0004565,beta-galactosidase activity; GO:0030246,carbohydrate binding; GO:0005975,carbohydrate metabolic process; GO:0003674,molecular_function; GO:0003824,catalytic activity; GO:0004553,hydrolase activity, hydrolyzing O-glycosyl compounds; GO:0015925,galactosidase activity; GO:0016787,hydrolase activity; GO:0016798,hydrolase activity, acting on glycosyl bonds; GO:0005488,bi…
IFM89_009714	GO:0005829,cytosol; GO:0005524,ATP binding; GO:0016405,CoA-ligase activity; GO:0000166,nucleotide binding; GO:0003674,molecular_function; GO:0005488,binding; GO:0017076,purine nucleotide binding; GO:0030554,adenyl nucleotide binding; GO:0032553,ribonucleotide binding; GO:0032555,purine ribonucleotide binding; GO:0032559,adenyl ribonucleotide binding; GO:0035639,purine ribonucleoside triphosphate …
IFM89_033509	GO:0005576,extracellular region; GO:0016020,membrane; GO:0009664,plant-type cell wall organization; GO:0009635,response to herbicide; GO:0006949,syncytium formation; GO:0008150,biological_process; GO:0009987,cellular process; GO:0016043,cellular component organization; GO:0045229,external encapsulating structure organization; GO:0071554,cell wall organization or biogenesis; GO:0071555,cell wall o…
IFM89_018785	GO:0008168,methyltransferase activity; GO:0032259,methylation; GO:0003674,molecular_function; GO:0003824,catalytic activity; GO:0016740,transferase activity; GO:0016741,transferase activity, transferring one-carbon groups; GO:0008150,biological_process; GO:0008152,metabolic process
IFM89_033045	GO:0016746,acyltransferase activity; GO:0006066,alcohol metabolic process; GO:0009836,fruit ripening, climacteric; GO:0009723,response to ethylene; GO:0003674,molecular_function; GO:0003824,catalytic activity; GO:0016740,transferase activity; GO:0008150,biological_process; GO:0008152,metabolic process; GO:0044281,small molecule metabolic process; GO:0071704,organic substance metabolic process; GO…
IFM89_007420	GO:0005634,nucleus; GO:0046872,metal ion binding; GO:0004842,ubiquitin-protein transferase activity; GO:0042742,defense response to bacterium; GO:0050832,defense response to fungus; GO:2000117,negative regulation of cysteine-type endopeptidase activity; GO:0043069,negative regulation of programmed cell death; GO:0043161,proteasome-mediated ubiquitin-dependent protein catabolic process; GO:0043067…
IFM89_000999	GO:0005576,extracellular region; GO:0016787,hydrolase activity; GO:0003674,molecular_function; GO:0003824,catalytic activity; GO:0005575,cellular_component; GO:0110165,cellular anatomical entity
IFM89_013083	GO:0005576,extracellular region; GO:0004650,polygalacturonase activity; GO:0005975,carbohydrate metabolic process; GO:0071555,cell wall organization; GO:0009835,fruit ripening; GO:0003674,molecular_function; GO:0003824,catalytic activity; GO:0004553,hydrolase activity, hydrolyzing O-glycosyl compounds; GO:0016787,hydrolase activity; GO:0016798,hydrolase activity, acting on glycosyl bonds; GO:0008…
IFM89_020743	GO:0000792,heterochromatin; GO:0005634,nucleus; GO:0032991,protein-containing complex; GO:0003700,DNA-binding transcription factor activity; GO:0140566,histone reader activity; GO:0046872,metal ion binding; GO:0043565,sequence-specific DNA binding; GO:0050832,defense response to fungus; GO:0032776,DNA methylation on cytosine; GO:0090436,leaf pavement cell development; GO:0009911,positive regulati…
novel.8219	GO:0005634,nucleus; GO:0003682,chromatin binding; GO:0003677,DNA binding; GO:0003700,DNA-binding transcription factor activity; GO:0042393,histone binding; GO:0019900,kinase binding; GO:0000976,transcription cis-regulatory region binding; GO:0006325,chromatin organization; GO:0042742,defense response to bacterium; GO:0009873,ethylene-activated signaling pathway; GO:0016573,histone acetylation; GO…
IFM89_032356	GO:0005789,endoplasmic reticulum membrane; GO:0016021,integral component of membrane; GO:0005774,vacuolar membrane; GO:0050474,(S)-norcoclaurine synthase activity; GO:1901010,(S)-reticuline metabolic process; GO:0006952,defense response; GO:0002238,response to molecule of fungal origin; GO:0003674,molecular_function; GO:0003824,catalytic activity; GO:0016829,lyase activity; GO:0016835,carbon-oxyg…
IFM89_027170	GO:0043531,ADP binding; GO:0005524,ATP binding; GO:0006952,defense response; GO:0051707,response to other organism; GO:0000166,nucleotide binding; GO:0003674,molecular_function; GO:0005488,binding; GO:0017076,purine nucleotide binding; GO:0030554,adenyl nucleotide binding; GO:0032553,ribonucleotide binding; GO:0032555,purine ribonucleotide binding; GO:0032559,adenyl ribonucleotide binding; GO:003…
IFM89_017077	GO:0009941,chloroplast envelope; GO:0031969,chloroplast membrane; GO:0005737,cytoplasm; GO:0009898,cytoplasmic side of plasma membrane; GO:0005829,cytosol; GO:0005783,endoplasmic reticulum; GO:0005794,Golgi apparatus; GO:0005739,mitochondrion; GO:0000325,plant-type vacuole; GO:0005886,plasma membrane; GO:0009506,plasmodesma; GO:0009536,plastid; GO:0045735,nutrient reservoir activity; GO:0030644,c…
novel.5523	GO:0043231,intracellular membrane-bounded organelle; GO:0003723,RNA binding; GO:0009451,RNA modification; GO:0003674,molecular_function; GO:0003676,nucleic acid binding; GO:0005488,binding; GO:0097159,organic cyclic compound binding; GO:1901363,heterocyclic compound binding; GO:0006139,nucleobase-containing compound metabolic process; GO:0006725,cellular aromatic compound metabolic process; GO:00…
IFM89_011538	GO:0016757,glycosyltransferase activity; GO:0003674,molecular_function; GO:0003824,catalytic activity; GO:0016740,transferase activity
IFM89_032983	GO:0005634,nucleus; GO:0005575,cellular_component; GO:0005622,intracellular anatomical structure; GO:0043226,organelle; GO:0043227,membrane-bounded organelle; GO:0043229,intracellular organelle; GO:0043231,intracellular membrane-bounded organelle; GO:0110165,cellular anatomical entity
IFM89_010976	GO:0005737,cytoplasm; GO:0005525,GTP binding; GO:0003924,GTPase activity; GO:0003746,translation elongation factor activity; GO:0000166,nucleotide binding; GO:0003674,molecular_function; GO:0005488,binding; GO:0017076,purine nucleotide binding; GO:0019001,guanyl nucleotide binding; GO:0032553,ribonucleotide binding; GO:0032555,purine ribonucleotide binding; GO:0032561,guanyl ribonucleotide bindin…
IFM89_015102	GO:0009507,chloroplast; GO:0009535,chloroplast thylakoid membrane; GO:0042651,thylakoid membrane; GO:0046872,metal ion binding; GO:0004659,prenyltransferase activity; GO:0043693,monoterpene biosynthetic process; GO:0003674,molecular_function; GO:0005488,binding; GO:0043167,ion binding; GO:0043169,cation binding; GO:0003824,catalytic activity; GO:0016740,transferase activity; GO:0016765,transferas…
IFM89_021040	GO:0005634,nucleus; GO:0005524,ATP binding; GO:0003677,DNA binding; GO:0003916,DNA topoisomerase activity; GO:0003918,DNA topoisomerase type II (double strand cut, ATP-hydrolyzing) activity; GO:0046872,metal ion binding; GO:0006265,DNA topological change; GO:0000712,resolution of meiotic recombination intermediates; GO:0000819,sister chromatid segregation; GO:0000166,nucleotide binding; GO:000367…
IFM89_020712	GO:0016021,integral component of membrane; GO:0005575,cellular_component; GO:0016020,membrane; GO:0031224,intrinsic component of membrane; GO:0110165,cellular anatomical entity
IFM89_024490	GO:0009507,chloroplast; GO:0005524,ATP binding; GO:0016887,ATP hydrolysis activity; GO:0000166,nucleotide binding; GO:0003674,molecular_function; GO:0005488,binding; GO:0017076,purine nucleotide binding; GO:0030554,adenyl nucleotide binding; GO:0032553,ribonucleotide binding; GO:0032555,purine ribonucleotide binding; GO:0032559,adenyl ribonucleotide binding; GO:0035639,purine ribonucleoside triph…
IFM89_037363	GO:0005829,cytosol; GO:0005524,ATP binding; GO:0047912,galacturonokinase activity; GO:0046872,metal ion binding; GO:0046835,carbohydrate phosphorylation; GO:0046396,D-galacturonate metabolic process; GO:0006012,galactose metabolic process; GO:0000166,nucleotide binding; GO:0003674,molecular_function; GO:0005488,binding; GO:0017076,purine nucleotide binding; GO:0030554,adenyl nucleotide binding; G…
IFM89_002620	GO:0048046,apoplast; GO:0009505,plant-type cell wall; GO:0050660,flavin adenine dinucleotide binding; GO:0052898,N1-acetylspermidine:oxygen oxidoreductase (propane-1,3-diamine-forming) activity; GO:0052893,N1-acetylspermine:oxygen oxidoreductase (propane-1,3-diamine-forming) activity; GO:0052897,N8-acetylspermidine:oxygen oxidoreductase (propane-1,3-diamine-forming) activity; GO:0016491,oxidoredu…
novel.6345	GO:0046872,metal ion binding; GO:0003676,nucleic acid binding; GO:0004523,RNA-DNA hybrid ribonuclease activity; GO:0003674,molecular_function; GO:0005488,binding; GO:0043167,ion binding; GO:0043169,cation binding; GO:0097159,organic cyclic compound binding; GO:1901363,heterocyclic compound binding; GO:0003824,catalytic activity; GO:0004518,nuclease activity; GO:0004519,endonuclease activity; GO:0…
IFM89_012424	GO:0005789,endoplasmic reticulum membrane; GO:0016021,integral component of membrane; GO:0050660,flavin adenine dinucleotide binding; GO:0010181,FMN binding; GO:0050661,NADP binding; GO:0003958,NADPH-hemoprotein reductase activity; GO:0000166,nucleotide binding; GO:0003674,molecular_function; GO:0005488,binding; GO:0036094,small molecule binding; GO:0043167,ion binding; GO:0043168,anion binding; …
IFM89_010525	GO:0005634,nucleus; GO:0006397,mRNA processing; GO:0048573,photoperiodism, flowering; GO:0008380,RNA splicing; GO:0006139,nucleobase-containing compound metabolic process; GO:0006396,RNA processing; GO:0006725,cellular aromatic compound metabolic process; GO:0006807,nitrogen compound metabolic process; GO:0008150,biological_process; GO:0008152,metabolic process; GO:0009987,cellular process; GO:00…
IFM89_000562	GO:0016021,integral component of membrane; GO:0005811,lipid droplet; GO:0016871,cycloartenol synthase activity; GO:0019745,pentacyclic triterpenoid biosynthetic process; GO:0016126,sterol biosynthetic process; GO:0003674,molecular_function; GO:0003824,catalytic activity; GO:0016853,isomerase activity; GO:0016866,intramolecular transferase activity; GO:0031559,oxidosqualene cyclase activity; GO:00…
novel.7453	GO:0005576,extracellular region; GO:0008422,beta-glucosidase activity; GO:0102483,scopolin beta-glucosidase activity; GO:0005975,carbohydrate metabolic process; GO:0003674,molecular_function; GO:0003824,catalytic activity; GO:0004553,hydrolase activity, hydrolyzing O-glycosyl compounds; GO:0015926,glucosidase activity; GO:0016787,hydrolase activity; GO:0016798,hydrolase activity, acting on glycos…
IFM89_033677	GO:0000786,nucleosome; GO:0005634,nucleus; GO:0003677,DNA binding; GO:0046982,protein heterodimerization activity; GO:0030527,structural constituent of chromatin; GO:0003674,molecular_function; GO:0003676,nucleic acid binding; GO:0005488,binding; GO:0097159,organic cyclic compound binding; GO:1901363,heterocyclic compound binding; GO:0005515,protein binding; GO:0046983,protein dimerization activi…
IFM89_031818	GO:0035251,UDP-glucosyltransferase activity; GO:0003674,molecular_function; GO:0003824,catalytic activity; GO:0008194,UDP-glycosyltransferase activity; GO:0016740,transferase activity; GO:0016757,glycosyltransferase activity; GO:0016758,hexosyltransferase activity; GO:0046527,glucosyltransferase activity
IFM89_032831	GO:0005634,nucleus; GO:0003723,RNA binding; GO:0009738,abscisic acid-activated signaling pathway; GO:0006397,mRNA processing; GO:0048024,regulation of mRNA splicing, via spliceosome; GO:0009737,response to abscisic acid; GO:0009414,response to water deprivation; GO:0008380,RNA splicing; GO:0003674,molecular_function; GO:0003676,nucleic acid binding; GO:0005488,binding; GO:0097159,organic cyclic c…
IFM89_004513	GO:0009507,chloroplast; GO:0005739,mitochondrion; GO:0050660,flavin adenine dinucleotide binding; GO:0004362,glutathione-disulfide reductase (NADPH) activity; GO:0050661,NADP binding; GO:0045454,cell redox homeostasis; GO:0006749,glutathione metabolic process; GO:0000166,nucleotide binding; GO:0003674,molecular_function; GO:0005488,binding; GO:0036094,small molecule binding; GO:0043167,ion bindin…
IFM89_012591	GO:0050474,(S)-norcoclaurine synthase activity; GO:0046872,metal ion binding; GO:0016491,oxidoreductase activity; GO:0009820,alkaloid metabolic process; GO:0003674,molecular_function; GO:0003824,catalytic activity; GO:0016829,lyase activity; GO:0016835,carbon-oxygen lyase activity; GO:0016836,hydro-lyase activity; GO:0005488,binding; GO:0043167,ion binding; GO:0043169,cation binding; GO:0006807,n…
IFM89_015337	GO:0009941,chloroplast envelope; GO:0005681,spliceosomal complex; GO:0005524,ATP binding; GO:0016887,ATP hydrolysis activity; GO:0003729,mRNA binding; GO:0003723,RNA binding; GO:0003724,RNA helicase activity; GO:0006397,mRNA processing; GO:0008380,RNA splicing; GO:0000166,nucleotide binding; GO:0003674,molecular_function; GO:0005488,binding; GO:0017076,purine nucleotide binding; GO:0030554,adenyl…
IFM89_030515	GO:0005737,cytoplasm; GO:0005829,cytosol; GO:0004177,aminopeptidase activity; GO:0046872,metal ion binding; GO:0070006,metalloaminopeptidase activity; GO:0008235,metalloexopeptidase activity; GO:0035551,protein initiator methionine removal involved in protein maturation; GO:0016485,protein processing; GO:0003674,molecular_function; GO:0003824,catalytic activity; GO:0008233,peptidase activity; GO:…
IFM89_007953	GO:0005886,plasma membrane; GO:0005575,cellular_component; GO:0016020,membrane; GO:0071944,cell periphery; GO:0110165,cellular anatomical entity
IFM89_017995	GO:0019146,arabinose-5-phosphate isomerase activity; GO:0005524,ATP binding; GO:1901135,carbohydrate derivative metabolic process; GO:0005975,carbohydrate metabolic process; GO:0003674,molecular_function; GO:0003824,catalytic activity; GO:0016853,isomerase activity; GO:0016860,intramolecular oxidoreductase activity; GO:0016861,intramolecular oxidoreductase activity, interconverting aldoses and ke…
IFM89_037819	GO:0005840,ribosome; GO:0019843,rRNA binding; GO:0003735,structural constituent of ribosome; GO:0006412,translation; GO:0003674,molecular_function; GO:0003676,nucleic acid binding; GO:0003723,RNA binding; GO:0005488,binding; GO:0097159,organic cyclic compound binding; GO:1901363,heterocyclic compound binding; GO:0005198,structural molecule activity; GO:0006518,peptide metabolic process; GO:000680…
IFM89_017800	GO:0005737,cytoplasm; GO:0005634,nucleus; GO:0000932,P-body; GO:0003729,mRNA binding; GO:0006397,mRNA processing; GO:0000381,regulation of alternative mRNA splicing, via spliceosome; GO:0043484,regulation of RNA splicing; GO:0006417,regulation of translation; GO:0008380,RNA splicing; GO:0009845,seed germination; GO:0003674,molecular_function; GO:0003676,nucleic acid binding; GO:0003723,RNA bindin…
IFM89_017519	GO:0005737,cytoplasm; GO:0005829,cytosol; GO:0005576,extracellular region; GO:0005654,nucleoplasm; GO:0004040,amidase activity; GO:0004067,asparaginase activity; GO:0016810,hydrolase activity, acting on carbon-nitrogen (but not peptide) bonds; GO:0043864,indoleacetamide hydrolase activity; GO:0009851,auxin biosynthetic process; GO:0009684,indoleacetic acid biosynthetic process; GO:0003674,molecul…
IFM89_016671	GO:0031234,extrinsic component of cytoplasmic side of plasma membrane; GO:0005886,plasma membrane; GO:0005516,calmodulin binding; GO:0003674,molecular_function; GO:0005488,binding; GO:0005515,protein binding; GO:0005575,cellular_component; GO:0009898,cytoplasmic side of plasma membrane; GO:0016020,membrane; GO:0019897,extrinsic component of plasma membrane; GO:0019898,extrinsic component of membr…
IFM89_006417	GO:0005737,cytoplasm; GO:0004365,glyceraldehyde-3-phosphate dehydrogenase (NAD+) (phosphorylating) activity; GO:0051287,NAD binding; GO:0050661,NADP binding; GO:0006006,glucose metabolic process; GO:0006096,glycolytic process; GO:0003674,molecular_function; GO:0003824,catalytic activity; GO:0016491,oxidoreductase activity; GO:0016620,oxidoreductase activity, acting on the aldehyde or oxo group of…
IFM89_021734	GO:0005834,heterotrimeric G-protein complex; GO:0005634,nucleus; GO:0001664,G protein-coupled receptor binding; GO:0031683,G-protein beta/gamma-subunit complex binding; GO:0005525,GTP binding; GO:0003924,GTPase activity; GO:0046872,metal ion binding; GO:0007188,adenylate cyclase-modulating G protein-coupled receptor signaling pathway; GO:2000280,regulation of root development; GO:0009617,response…
IFM89_016516	GO:0035252,UDP-xylosyltransferase activity; GO:0009718,anthocyanin-containing compound biosynthetic process; GO:0003674,molecular_function; GO:0003824,catalytic activity; GO:0008194,UDP-glycosyltransferase activity; GO:0016740,transferase activity; GO:0016757,glycosyltransferase activity; GO:0016763,pentosyltransferase activity; GO:0042285,xylosyltransferase activity; GO:0008150,biological_proces…
IFM89_000677	GO:0005788,endoplasmic reticulum lumen; GO:0005509,calcium ion binding; GO:0030246,carbohydrate binding; GO:0051082,unfolded protein binding; GO:0006457,protein folding; GO:0003674,molecular_function; GO:0005488,binding; GO:0043167,ion binding; GO:0043169,cation binding; GO:0046872,metal ion binding; GO:0005515,protein binding; GO:0008150,biological_process; GO:0009987,cellular process; GO:000557…
IFM89_006165	GO:0016021,integral component of membrane; GO:0005886,plasma membrane; GO:0005262,calcium channel activity; GO:0008066,glutamate receptor activity; GO:0015276,ligand-gated ion channel activity; GO:0038023,signaling receptor activity; GO:0006816,calcium ion transport; GO:0019722,calcium-mediated signaling; GO:0071230,cellular response to amino acid stimulus; GO:0003674,molecular_function; GO:00052…
IFM89_013580	GO:0005737,cytoplasm; GO:0005874,microtubule; GO:0005525,GTP binding; GO:0005200,structural constituent of cytoskeleton; GO:0007017,microtubule-based process; GO:0000166,nucleotide binding; GO:0003674,molecular_function; GO:0005488,binding; GO:0017076,purine nucleotide binding; GO:0019001,guanyl nucleotide binding; GO:0032553,ribonucleotide binding; GO:0032555,purine ribonucleotide binding; GO:00…
novel.4949	GO:0005768,endosome; GO:0005794,Golgi apparatus; GO:0030173,integral component of Golgi membrane; GO:0016021,integral component of membrane; GO:0005802,trans-Golgi network; GO:0006891,intra-Golgi vesicle-mediated transport; GO:0006810,transport; GO:0008150,biological_process; GO:0016192,vesicle-mediated transport; GO:0048193,Golgi vesicle transport; GO:0051179,localization; GO:0051234,establishme…
IFM89_020822	GO:0016021,integral component of membrane; GO:0005575,cellular_component; GO:0016020,membrane; GO:0031224,intrinsic component of membrane; GO:0110165,cellular anatomical entity
IFM89_023648	GO:0009507,chloroplast; GO:0010193,response to ozone; GO:0010224,response to UV-B; GO:0009611,response to wounding; GO:0000302,response to reactive oxygen species; GO:0006950,response to stress; GO:0006979,response to oxidative stress; GO:0008150,biological_process; GO:0010035,response to inorganic substance; GO:0042221,response to chemical; GO:0050896,response to stimulus; GO:1901700,response to…
IFM89_005906	GO:0005874,microtubule; GO:0008017,microtubule binding; GO:0003674,molecular_function; GO:0005488,binding; GO:0005515,protein binding; GO:0008092,cytoskeletal protein binding; GO:0015631,tubulin binding; GO:0005575,cellular_component; GO:0005622,intracellular anatomical structure; GO:0005856,cytoskeleton; GO:0015630,microtubule cytoskeleton; GO:0043226,organelle; GO:0043228,non-membrane-bounded o…
IFM89_012357	GO:0016021,integral component of membrane; GO:0016020,membrane; GO:0005524,ATP binding; GO:0042626,ATPase-coupled transmembrane transporter activity; GO:0055085,transmembrane transport; GO:0000166,nucleotide binding; GO:0003674,molecular_function; GO:0005488,binding; GO:0017076,purine nucleotide binding; GO:0030554,adenyl nucleotide binding; GO:0032553,ribonucleotide binding; GO:0032555,purine ri…
IFM89_023666	GO:0000796,condensin complex; GO:0051301,cell division; GO:0007076,mitotic chromosome condensation; GO:0008150,biological_process; GO:0009987,cellular process; GO:0000070,mitotic sister chromatid segregation; GO:0000278,mitotic cell cycle; GO:0000280,nuclear division; GO:0000819,sister chromatid segregation; GO:0006996,organelle organization; GO:0007049,cell cycle; GO:0007059,chromosome segregati…
IFM89_025521	GO:0009506,plasmodesma; GO:0005575,cellular_component; GO:0005911,cell-cell junction; GO:0030054,cell junction; GO:0055044,symplast; GO:0070161,anchoring junction; GO:0110165,cellular anatomical entity
IFM89_008112	GO:0005737,cytoplasm; GO:0005634,nucleus; GO:0008104,protein localization; GO:0007165,signal transduction; GO:0008150,biological_process; GO:0009987,cellular process; GO:0033036,macromolecule localization; GO:0051179,localization; GO:0051641,cellular localization; GO:0070727,cellular macromolecule localization; GO:0007154,cell communication; GO:0023052,signaling; GO:0050789,regulation of biologic…
IFM89_032109	GO:0050474,(S)-norcoclaurine synthase activity; GO:0046872,metal ion binding; GO:0016491,oxidoreductase activity; GO:0009820,alkaloid metabolic process; GO:0003674,molecular_function; GO:0003824,catalytic activity; GO:0016829,lyase activity; GO:0016835,carbon-oxygen lyase activity; GO:0016836,hydro-lyase activity; GO:0005488,binding; GO:0043167,ion binding; GO:0043169,cation binding; GO:0006807,n…
IFM89_017643	GO:0047763,caffeate O-methyltransferase activity; GO:0046983,protein dimerization activity; GO:0009809,lignin biosynthetic process; GO:0032259,methylation; GO:0003674,molecular_function; GO:0003824,catalytic activity; GO:0008168,methyltransferase activity; GO:0008171,O-methyltransferase activity; GO:0016740,transferase activity; GO:0016741,transferase activity, transferring one-carbon groups; GO:…
IFM89_016645	GO:0016021,integral component of membrane; GO:0015095,magnesium ion transmembrane transporter activity; GO:0015693,magnesium ion transport; GO:0003674,molecular_function; GO:0005215,transporter activity; GO:0008324,cation transmembrane transporter activity; GO:0015075,ion transmembrane transporter activity; GO:0015318,inorganic molecular entity transmembrane transporter activity; GO:0022857,trans…
IFM89_036372	GO:0005634,nucleus; GO:0004860,protein kinase inhibitor activity; GO:0007049,cell cycle; GO:0045839,negative regulation of mitotic nuclear division; GO:0032875,regulation of DNA endoreduplication; GO:0003674,molecular_function; GO:0004857,enzyme inhibitor activity; GO:0019207,kinase regulator activity; GO:0019210,kinase inhibitor activity; GO:0019887,protein kinase regulator activity; GO:0030234,…
IFM89_002015	GO:0016021,integral component of membrane; GO:0005811,lipid droplet; GO:0090406,pollen tube; GO:0047372,acylglycerol lipase activity; GO:0033878,hormone-sensitive lipase activity; GO:0004806,triglyceride lipase activity; GO:0016042,lipid catabolic process; GO:0003674,molecular_function; GO:0003824,catalytic activity; GO:0016298,lipase activity; GO:0016787,hydrolase activity; GO:0016788,hydrolase …
novel.8079	GO:0009507,chloroplast; GO:0009941,chloroplast envelope; GO:0009570,chloroplast stroma; GO:0005829,cytosol; GO:0022626,cytosolic ribosome; GO:0003729,mRNA binding; GO:0003723,RNA binding; GO:0019843,rRNA binding; GO:0003735,structural constituent of ribosome; GO:0006412,translation; GO:0003674,molecular_function; GO:0003676,nucleic acid binding; GO:0005488,binding; GO:0097159,organic cyclic compo…
IFM89_014002	GO:0016021,integral component of membrane; GO:0005886,plasma membrane; GO:0005524,ATP binding; GO:0004672,protein kinase activity; GO:0106310,protein serine kinase activity; GO:0004674,protein serine/threonine kinase activity; GO:0009738,abscisic acid-activated signaling pathway; GO:0071485,cellular response to absence of light; GO:0071244,cellular response to carbon dioxide; GO:1901528,hydrogen …
IFM89_021592	GO:0005737,cytoplasm; GO:0016768,spermine synthase activity; GO:0010487,thermospermine synthase activity; GO:0009926,auxin polar transport; GO:0010087,phloem or xylem histogenesis; GO:0006596,polyamine biosynthetic process; GO:0048759,xylem vessel member cell differentiation; GO:0003674,molecular_function; GO:0003824,catalytic activity; GO:0016740,transferase activity; GO:0016765,transferase acti…
novel.8688	GO:0009507,chloroplast; GO:0009941,chloroplast envelope; GO:0031969,chloroplast membrane; GO:0005829,cytosol; GO:0016021,integral component of membrane; GO:0016020,membrane; GO:0009536,plastid; GO:0005575,cellular_component; GO:0005622,intracellular anatomical structure; GO:0005737,cytoplasm; GO:0043226,organelle; GO:0043227,membrane-bounded organelle; GO:0043229,intracellular organelle; GO:00432…
novel.4638	GO:0005524,ATP binding; GO:0016887,ATP hydrolysis activity; GO:0003678,DNA helicase activity; GO:0006310,DNA recombination; GO:0006281,DNA repair; GO:0000723,telomere maintenance; GO:0000166,nucleotide binding; GO:0003674,molecular_function; GO:0005488,binding; GO:0017076,purine nucleotide binding; GO:0030554,adenyl nucleotide binding; GO:0032553,ribonucleotide binding; GO:0032555,purine ribonucl…
IFM89_026727	GO:0016021,integral component of membrane; GO:0015250,water channel activity; GO:0003674,molecular_function; GO:0005215,transporter activity; GO:0005372,water transmembrane transporter activity; GO:0015267,channel activity; GO:0015318,inorganic molecular entity transmembrane transporter activity; GO:0022803,passive transmembrane transporter activity; GO:0022857,transmembrane transporter activity;…
IFM89_034172	GO:0005886,plasma membrane; GO:0046872,metal ion binding; GO:0017018,myosin phosphatase activity; GO:0006470,protein dephosphorylation; GO:0003674,molecular_function; GO:0005488,binding; GO:0043167,ion binding; GO:0043169,cation binding; GO:0003824,catalytic activity; GO:0004721,phosphoprotein phosphatase activity; GO:0004722,protein serine/threonine phosphatase activity; GO:0016787,hydrolase act…
IFM89_017434	GO:0000775,chromosome, centromeric region; GO:0000792,heterochromatin; GO:0005634,nucleus; GO:0042393,histone binding; GO:0035064,methylated histone binding; GO:0006346,DNA methylation-dependent heterochromatin formation; GO:0036123,histone H3-K9 dimethylation; GO:0044030,regulation of DNA methylation; GO:0003674,molecular_function; GO:0005488,binding; GO:0005515,protein binding; GO:0140030,modif…
novel.4994	GO:0016607,nuclear speck; GO:0005634,nucleus; GO:0003723,RNA binding; GO:0006397,mRNA processing; GO:0008380,RNA splicing; GO:0003674,molecular_function; GO:0003676,nucleic acid binding; GO:0005488,binding; GO:0097159,organic cyclic compound binding; GO:1901363,heterocyclic compound binding; GO:0006139,nucleobase-containing compound metabolic process; GO:0006396,RNA processing; GO:0006725,cellula…
IFM89_039934	GO:0016021,integral component of membrane; GO:0005575,cellular_component; GO:0016020,membrane; GO:0031224,intrinsic component of membrane; GO:0110165,cellular anatomical entity
IFM89_002313	GO:0005887,integral component of plasma membrane; GO:0005886,plasma membrane; GO:0008519,ammonium transmembrane transporter activity; GO:0072488,ammonium transmembrane transport; GO:0009610,response to symbiotic fungus; GO:0003674,molecular_function; GO:0005215,transporter activity; GO:0005216,ion channel activity; GO:0005261,cation channel activity; GO:0008324,cation transmembrane transporter ac…
IFM89_007700	GO:0005739,mitochondrion; GO:0009361,succinate-CoA ligase complex (ADP-forming); GO:0000166,nucleotide binding; GO:0004775,succinate-CoA ligase (ADP-forming) activity; GO:0004776,succinate-CoA ligase (GDP-forming) activity; GO:0006105,succinate metabolic process; GO:0006104,succinyl-CoA metabolic process; GO:0006099,tricarboxylic acid cycle; GO:0003674,molecular_function; GO:0005488,binding; GO:0…
novel.4227	GO:0005829,cytosol; GO:0009331,glycerol-3-phosphate dehydrogenase complex; GO:0005743,mitochondrial inner membrane; GO:0005739,mitochondrion; GO:0004368,glycerol-3-phosphate dehydrogenase (quinone) activity; GO:0052591,sn-glycerol-3-phosphate:ubiquinone-8 oxidoreductase activity; GO:0019563,glycerol catabolic process; GO:0006072,glycerol-3-phosphate metabolic process; GO:0006127,glycerophosphate …
IFM89_010703	GO:0005886,plasma membrane; GO:0009536,plastid; GO:0043531,ADP binding; GO:0005524,ATP binding; GO:0000166,nucleotide binding; GO:0071446,cellular response to salicylic acid stimulus; GO:0006952,defense response; GO:0051607,defense response to virus; GO:0009626,plant-type hypersensitive response; GO:0002230,positive regulation of defense response to virus by host; GO:0009646,response to absence o…
IFM89_039455	GO:0005737,cytoplasm; GO:0004364,glutathione transferase activity; GO:0009734,auxin-activated signaling pathway; GO:0006749,glutathione metabolic process; GO:0003674,molecular_function; GO:0003824,catalytic activity; GO:0016740,transferase activity; GO:0016765,transferase activity, transferring alkyl or aryl (other than methyl) groups; GO:0007154,cell communication; GO:0007165,signal transduction…
IFM89_034391	GO:0031225,anchored component of membrane; GO:0046658,anchored component of plasma membrane; GO:0000325,plant-type vacuole; GO:0005886,plasma membrane; GO:0009536,plastid; GO:0009055,electron transfer activity; GO:0003674,molecular_function; GO:0003824,catalytic activity; GO:0016491,oxidoreductase activity; GO:0005575,cellular_component; GO:0016020,membrane; GO:0031224,intrinsic component of memb…
IFM89_000116	GO:0005829,cytosol; GO:0005576,extracellular region; GO:0004334,fumarylacetoacetase activity; GO:0046872,metal ion binding; GO:0008219,cell death; GO:1902000,homogentisate catabolic process; GO:0006559,L-phenylalanine catabolic process; GO:0006572,tyrosine catabolic process; GO:0003674,molecular_function; GO:0003824,catalytic activity; GO:0016787,hydrolase activity; GO:0016822,hydrolase activity,…
IFM89_019847	GO:0009507,chloroplast; GO:0009941,chloroplast envelope; GO:0016021,integral component of membrane; GO:0009536,plastid; GO:0042170,plastid membrane; GO:0006811,ion transport; GO:0006810,transport; GO:0008150,biological_process; GO:0051179,localization; GO:0051234,establishment of localization; GO:0005575,cellular_component; GO:0005622,intracellular anatomical structure; GO:0005737,cytoplasm; GO:0…
IFM89_007607	GO:0009536,plastid; GO:0004411,homogentisate 1,2-dioxygenase activity; GO:0046872,metal ion binding; GO:1902000,homogentisate catabolic process; GO:0006559,L-phenylalanine catabolic process; GO:0006572,tyrosine catabolic process; GO:0003674,molecular_function; GO:0003824,catalytic activity; GO:0016491,oxidoreductase activity; GO:0016701,oxidoreductase activity, acting on single donors with incorp…
IFM89_038479	GO:0043531,ADP binding; GO:0005524,ATP binding; GO:0050832,defense response to fungus; GO:0000166,nucleotide binding; GO:0003674,molecular_function; GO:0005488,binding; GO:0017076,purine nucleotide binding; GO:0030554,adenyl nucleotide binding; GO:0032553,ribonucleotide binding; GO:0032555,purine ribonucleotide binding; GO:0032559,adenyl ribonucleotide binding; GO:0036094,small molecule binding; …
IFM89_005793	GO:0048046,apoplast; GO:0009505,plant-type cell wall; GO:0005886,plasma membrane; GO:0005773,vacuole; GO:0004565,beta-galactosidase activity; GO:0030246,carbohydrate binding; GO:0005975,carbohydrate metabolic process; GO:0003674,molecular_function; GO:0003824,catalytic activity; GO:0004553,hydrolase activity, hydrolyzing O-glycosyl compounds; GO:0015925,galactosidase activity; GO:0016787,hydrolas…
IFM89_031719	GO:0048046,apoplast; GO:0005615,extracellular space; GO:0009505,plant-type cell wall; GO:0009506,plasmodesma; GO:0005575,cellular_component; GO:0005576,extracellular region; GO:0110165,cellular anatomical entity; GO:0005618,cell wall; GO:0030312,external encapsulating structure; GO:0071944,cell periphery; GO:0005911,cell-cell junction; GO:0030054,cell junction; GO:0055044,symplast; GO:0070161,anc…
IFM89_038873	GO:0005938,cell cortex; GO:0005737,cytoplasm; GO:0005874,microtubule; GO:0005634,nucleus; GO:0009524,phragmoplast; GO:0005819,spindle; GO:0008017,microtubule binding; GO:0046983,protein dimerization activity; GO:0043622,cortical microtubule organization; GO:0000911,cytokinesis by cell plate formation; GO:0000226,microtubule cytoskeleton organization; GO:0003674,molecular_function; GO:0005488,bind…
IFM89_039640	GO:0016021,integral component of membrane; GO:0005886,plasma membrane; GO:0005524,ATP binding; GO:0042802,identical protein binding; GO:0042277,peptide binding; GO:0001653,peptide receptor activity; GO:0004672,protein kinase activity; GO:0106310,protein serine kinase activity; GO:0004674,protein serine/threonine kinase activity; GO:0045087,innate immune response; GO:0046777,protein autophosphoryl…
IFM89_017742	GO:0005794,Golgi apparatus; GO:0000139,Golgi membrane; GO:0016021,integral component of membrane; GO:0016757,glycosyltransferase activity; GO:0071555,cell wall organization; GO:0010417,glucuronoxylan biosynthetic process; GO:0006486,protein glycosylation; GO:0003674,molecular_function; GO:0003824,catalytic activity; GO:0016740,transferase activity; GO:0008150,biological_process; GO:0009987,cellul…
IFM89_033347	GO:0008194,UDP-glycosyltransferase activity; GO:0003674,molecular_function; GO:0003824,catalytic activity; GO:0016740,transferase activity; GO:0016757,glycosyltransferase activity
IFM89_026253	GO:0005737,cytoplasm; GO:0005516,calmodulin binding; GO:0003755,peptidyl-prolyl cis-trans isomerase activity; GO:0061077,chaperone-mediated protein folding; GO:0000413,protein peptidyl-prolyl isomerization; GO:0003674,molecular_function; GO:0005488,binding; GO:0005515,protein binding; GO:0003824,catalytic activity; GO:0016853,isomerase activity; GO:0016859,cis-trans isomerase activity; GO:0140096…
novel.1912	GO:0000786,nucleosome; GO:0005634,nucleus; GO:0003677,DNA binding; GO:0046982,protein heterodimerization activity; GO:0030527,structural constituent of chromatin; GO:0003674,molecular_function; GO:0003676,nucleic acid binding; GO:0005488,binding; GO:0097159,organic cyclic compound binding; GO:1901363,heterocyclic compound binding; GO:0005515,protein binding; GO:0046983,protein dimerization activi…
IFM89_003973	GO:0005783,endoplasmic reticulum; GO:0005794,Golgi apparatus; GO:0016021,integral component of membrane; GO:0016413,O-acetyltransferase activity; GO:0006952,defense response; GO:0009620,response to fungus; GO:0003674,molecular_function; GO:0003824,catalytic activity; GO:0008374,O-acyltransferase activity; GO:0016407,acetyltransferase activity; GO:0016740,transferase activity; GO:0016746,acyltrans…
[truncated: 20,121 more rows]
