# Supplementary material for: Transcriptome and Metabolome Analysis of Isoquinoline Alkaloid Biosynthesis of Coptis chinensis in Different Years
Source: Genes (Basel). 2023 Dec 18;14(12):2232. doi: 10.3390/genes14122232 (PMC10742649; doi:10.3390/genes14122232)
Supplement: Supplementary file 1 [file genes-14-02232-s001.zip › Supplementary Table S6 Genes annotation in KEGG.xlsx]

## Sheet: gene.KEGG
ID	Annotation
IFM89_033633	K19747 BAHD acyltransferase [EC:2.3.1.-] | (RefSeq) BAHD acyltransferase DCR (A)
IFM89_016960	K14485 transport inhibitor response 1 | (RefSeq) protein TRANSPORT INHIBITOR RESPONSE 1-like (A)
IFM89_034423	K07735 putative transcriptional regulator | (RefSeq) uncharacterized protein LOC111200446 (A)
IFM89_032556	K17592 sacsin | (RefSeq) sacsin-like (A)
IFM89_011601	K22683 aspartyl protease family protein [EC:3.4.23.-] | (RefSeq) protein ASPARTIC PROTEASE IN GUARD CELL 1-like (A)
IFM89_028660	K00457 4-hydroxyphenylpyruvate dioxygenase [EC:1.13.11.27] | (RefSeq) 4-hydroxyphenylpyruvate dioxygenase (A)
IFM89_004116	K03294 basic amino acid/polyamine antiporter, APA family | (RefSeq) cationic amino acid transporter 1 isoform X1 (A)
IFM89_018130	K07213 copper chaperone | (GenBank) copper chaperone (A)
IFM89_034725	K15015 solute carrier family 32 (vesicular inhibitory amino acid transporter) | (RefSeq) vacuolar amino acid transporter 1 (A)
IFM89_016713	K07025 putative hydrolase of the HAD superfamily | (RefSeq) uncharacterized protein LOC114292903 (A)
IFM89_005173	K12761 carbon catabolite-derepressing protein kinase [EC:2.7.11.1] | (RefSeq) CBL-interacting serine/threonine-protein kinase 7-like (A)
IFM89_025626	K09422 transcription factor MYB, plant | (RefSeq) transcription factor MYB108 (A)
IFM89_038438	K03875 F-box and leucine-rich repeat protein 1 (S-phase kinase-associated protein 2) | (RefSeq) F-box protein SKP2A-like (A)
IFM89_014288	K22418 11beta/17beta-hydroxysteroid dehydrogenase [EC:1.1.1.146 1.1.1.-] | (RefSeq) 11-beta-hydroxysteroid dehydrogenase 1A-like (A)
IFM89_013433	K01602 ribulose-bisphosphate carboxylase small chain [EC:4.1.1.39] | (RefSeq) ribulose bisphosphate carboxylase small chain, chloroplastic (A)
IFM89_014928	K05929 phosphoethanolamine N-methyltransferase [EC:2.1.1.103] | (RefSeq) phosphomethylethanolamine N-methyltransferase-like (A)
IFM89_037381	K13385 N-methylcoclaurine 3'-monooxygenase [EC:1.14.14.102] | (RefSeq) (S)-N-methylcoclaurine 3'-hydroxylase isozyme 1 (A)
IFM89_002418	K19040 E3 ubiquitin-protein ligase ATL10/75/76/77/78 [EC:2.3.2.27] | (RefSeq) RING-H2 finger protein ATL78-like (A)
IFM89_001988	K09843 (+)-abscisic acid 8'-hydroxylase [EC:1.14.14.137] | (RefSeq) abscisic acid 8'-hydroxylase 4 (A)
IFM89_009523	K16196 eukaryotic translation initiation factor 2-alpha kinase 4 [EC:2.7.11.1] | (RefSeq) eIF-2-alpha kinase GCN2 (A)
IFM89_016965	K01177 beta-amylase [EC:3.2.1.2] | (RefSeq) hypothetical protein (A)
IFM89_029031	K02068 UDP-glucose/iron transport system ATP-binding protein | (RefSeq) ABC transporter I family member 17-like (A)
IFM89_010499	K19891 glucan endo-1,3-beta-glucosidase 1/2/3 [EC:3.2.1.39] | (RefSeq) hypothetical protein (A)
IFM89_005779	K12637 3-epi-6-deoxocathasterone 23-monooxygenase [EC:1.14.14.147] | (RefSeq) 3-epi-6-deoxocathasterone 23-monooxygenase-like (A)
IFM89_030295	K03798 cell division protease FtsH [EC:3.4.24.-] | (RefSeq) ATP-dependent zinc metalloprotease FTSH, chloroplastic (A)
novel.6557	K08493 vesicle transport through interaction with t-SNAREs 1 | (RefSeq) vesicle transport v-SNARE 13-like (A)
IFM89_033856	K12823 ATP-dependent RNA helicase DDX5/DBP2 [EC:3.6.4.13] | (RefSeq) ATP-dependent RNA helicase-like protein DB10 (A)
IFM89_003733	K01626 3-deoxy-7-phosphoheptulonate synthase [EC:2.5.1.54] | (RefSeq) phospho-2-dehydro-3-deoxyheptonate aldolase 1, chloroplastic-like (A)
IFM89_038178	K25304 DNA-directed RNA polymerase III subunit RPC9 | (RefSeq) DNA-directed RNA polymerase III subunit rpc9-like (A)
IFM89_033983	K03686 molecular chaperone DnaJ | (RefSeq) hypothetical protein (A)
IFM89_015272	K12836 splicing factor U2AF 35 kDa subunit | (RefSeq) splicing factor U2af small subunit B-like (A)
novel.6789	K01148 poly(A)-specific ribonuclease [EC:3.1.13.4] | (RefSeq) poly(A)-specific ribonuclease PARN (A)
novel.6353	K12820 pre-mRNA-splicing factor ATP-dependent RNA helicase DHX15/PRP43 [EC:3.6.4.13] | (RefSeq) F-box protein At5g03970-like (A)
IFM89_034846	K04077 chaperonin GroEL | (RefSeq) chaperonin CPN60-2, mitochondrial (A)
IFM89_004602	K09590 brassinosteroid-6-oxidase 1 [EC:1.14.-.-] | (RefSeq) cytochrome P450 85A1-like (A)
IFM89_027923	K03141 transcription initiation factor TFIIH subunit 1 | (RefSeq) general transcription and DNA repair factor IIH subunit TFB1-1-like isoform X1 (A)
IFM89_016410	K00430 peroxidase [EC:1.11.1.7] | (RefSeq) peroxidase N (A)
IFM89_025458	K14486 auxin response factor | (RefSeq) auxin response factor 19-like (A)
IFM89_004970	K20715 phototropin [EC:2.7.11.1] | (RefSeq) phototropin-2-like isoform X1 (A)
IFM89_007330	K03113 translation initiation factor 1 | (RefSeq) protein translation factor SUI1 homolog (A)
IFM89_002224	K01968 3-methylcrotonyl-CoA carboxylase alpha subunit [EC:6.4.1.4] | (RefSeq) methylcrotonoyl-CoA carboxylase subunit alpha, mitochondrial (A)
IFM89_030593	K00276 primary-amine oxidase [EC:1.4.3.21] | (RefSeq) primary amine oxidase-like (A)
IFM89_018380	K08331 autophagy-related protein 13 | (RefSeq) autophagy-related protein 13b (A)
IFM89_012949	K01904 4-coumarate--CoA ligase [EC:6.2.1.12] | (RefSeq) 4-coumarate--CoA ligase 2-like (A)
IFM89_007551	K22128 piezo-type mechanosensitive ion channel component 1/2 | (RefSeq) hypothetical protein (A)
IFM89_012393	K08486 syntaxin 1B/2/3 | (RefSeq) syntaxin-132-like (A)
IFM89_005116	K00847 fructokinase [EC:2.7.1.4] | (RefSeq) fructokinase-2-like (A)
IFM89_008715	K08901 photosystem II oxygen-evolving enhancer protein 3 | (RefSeq) oxygen-evolving enhancer protein 3-2, chloroplastic-like (A)
IFM89_016433	K10583 ubiquitin-conjugating enzyme E2 S [EC:2.3.2.23] | (RefSeq) ubiquitin-conjugating enzyme E2 22 (A)
novel.2125	K23286 neurobeachin-like protein 1/2 | (RefSeq) predicted protein (A)
novel.8345	K06272 integrin-linked kinase [EC:2.7.11.1] | (RefSeq) probable serine/threonine-protein kinase DDB_G0271682 isoform X1 (A)
IFM89_021560	K00058 D-3-phosphoglycerate dehydrogenase / 2-oxoglutarate reductase [EC:1.1.1.95 1.1.1.399] | (RefSeq) D-3-phosphoglycerate dehydrogenase 3, chloroplastic-like (A)
IFM89_002458	K24139 auxin efflux carrier family protein | (RefSeq) protein PIN-LIKES 7-like (A)
IFM89_014217	K01739 cystathionine gamma-synthase [EC:2.5.1.48] | (RefSeq) cystathionine gamma-synthase 1, chloroplastic-like (A)
novel.8113	K01285 lysosomal Pro-X carboxypeptidase [EC:3.4.16.2] | (RefSeq) lysosomal Pro-X carboxypeptidase (A)
novel.3956	no KO assigned | (RefSeq) probable protein S-acyltransferase 7 (A)
IFM89_006888	K02875 large subunit ribosomal protein L14e | (RefSeq) uncharacterized protein LOC105033615 (A)
IFM89_032854	K13385 N-methylcoclaurine 3'-monooxygenase [EC:1.14.14.102] | (RefSeq) (S)-N-methylcoclaurine 3'-hydroxylase isozyme 1 (A)
IFM89_034180	K03686 molecular chaperone DnaJ | (RefSeq) chaperone protein DnaJ (A)
novel.3269	K03834 tyrosine-specific transport protein | (RefSeq) tyrosine-specific transport protein-like (A)
IFM89_009525	K01184 polygalacturonase [EC:3.2.1.15] | (RefSeq) polygalacturonase At1g48100 (A)
IFM89_009131	K00432 glutathione peroxidase [EC:1.11.1.9] | (RefSeq) probable glutathione peroxidase 5 (A)
IFM89_022620	K01188 beta-glucosidase [EC:3.2.1.21] | (RefSeq) beta-glucosidase 24-like (A)
IFM89_012137	K00787 farnesyl diphosphate synthase [EC:2.5.1.1 2.5.1.10] | (RefSeq) putative WEB family protein At4g17210 (A)
IFM89_032015	K03122 transcription initiation factor TFIIA large subunit | (RefSeq) uncharacterized protein LOC114825099 (A)
IFM89_020308	K00963 UTP--glucose-1-phosphate uridylyltransferase [EC:2.7.7.9] | (RefSeq) UTP--glucose-1-phosphate uridylyltransferase (A)
IFM89_021954	K00454 lipoxygenase [EC:1.13.11.12] | (RefSeq) linoleate 13S-lipoxygenase 2-1, chloroplastic-like (A)
IFM89_011008	K09060 plant G-box-binding factor | (RefSeq) G-box-binding factor 1 isoform X1 (A)
IFM89_036526	K22390 acid phosphatase type 7 | (RefSeq) purple acid phosphatase 22-like (A)
IFM89_010682	K00789 S-adenosylmethionine synthetase [EC:2.5.1.6] | (RefSeq) S-adenosylmethionine synthase 1 (A)
IFM89_006662	K02958 small subunit ribosomal protein S15e | (RefSeq) uncharacterized protein LOC110912550 (A)
IFM89_012538	K22856 EEF1A lysine methyltransferase 2 [EC:2.1.1.-] | (RefSeq) EEF1A lysine methyltransferase 2-like (A)
novel.8045	K01285 lysosomal Pro-X carboxypeptidase [EC:3.4.16.2] | (RefSeq) lysosomal Pro-X carboxypeptidase-like (A)
IFM89_003004	K13096 splicing factor 4 | (RefSeq) SURP and G-patch domain-containing protein 1-like protein (A)
IFM89_025610	K18819 inositol 3-alpha-galactosyltransferase [EC:2.4.1.123] | (RefSeq) galactinol synthase 2-like (A)
IFM89_015797	K07213 copper chaperone | (RefSeq) copper transport protein CCH-like (A)
IFM89_019951	K14826 FK506-binding nuclear protein [EC:5.2.1.8] | (RefSeq) uncharacterized protein LOC107008897 isoform X1 (A)
IFM89_001641	K20890 xylan alpha-glucuronosyltransferase [EC:2.4.1.-] | (RefSeq) UDP-glucuronate:xylan alpha-glucuronosyltransferase 1-like (A)
IFM89_009002	K13051 L-asparaginase / beta-aspartyl-peptidase [EC:3.5.1.1 3.4.19.5] | (RefSeq) probable isoaspartyl peptidase/L-asparaginase 2 (A)
IFM89_038392	K17604 zinc finger SWIM domain-containing protein 3 | (RefSeq) protein FAR1-RELATED SEQUENCE 5 isoform X1 (A)
IFM89_031645	K03327 multidrug resistance protein, MATE family | (RefSeq) protein DETOXIFICATION 29-like (A)
IFM89_036586	K09422 transcription factor MYB, plant | (RefSeq) transcription factor AS1-like (A)
IFM89_011528	K17686 P-type Cu+ transporter [EC:7.2.2.8] | (RefSeq) copper-transporting ATPase HMA5-like (A)
IFM89_035040	K01859 chalcone isomerase [EC:5.5.1.6] | (RefSeq) chalcone--flavonone isomerase (A)
IFM89_003647	K01866 tyrosyl-tRNA synthetase [EC:6.1.1.1] | (RefSeq) uncharacterized LOC105775527 (A)
IFM89_018830	K05391 cyclic nucleotide gated channel, plant | (RefSeq) probable cyclic nucleotide-gated ion channel 5 isoform X1 (A)
IFM89_030396	K00660 chalcone synthase [EC:2.3.1.74] | (RefSeq) chalcone synthase-like (A)
IFM89_026391	K10666 E3 ubiquitin-protein ligase RNF5 [EC:2.3.2.27] | (RefSeq) E3 ubiquitin-protein ligase RMA1H1-like (A)
IFM89_024738	K01262 Xaa-Pro aminopeptidase [EC:3.4.11.9] | (RefSeq) probable Xaa-Pro aminopeptidase P (A)
IFM89_017557	K22683 aspartyl protease family protein [EC:3.4.23.-] | (RefSeq) aspartyl protease family protein 2-like (A)
IFM89_002575	K07565 60S ribosome subunit biogenesis protein NIP7 | (RefSeq) 60S ribosome subunit biogenesis protein NIP7 homolog (A)
IFM89_029133	K14505 cyclin D3, plant | (RefSeq) cyclin-D3-1-like (A)
IFM89_017076	K03098 apolipoprotein D and lipocalin family protein | (RefSeq) temperature-induced lipocalin-1 (A)
IFM89_018251	K00430 peroxidase [EC:1.11.1.7] | (RefSeq) peroxidase 42 (A)
IFM89_037840	K01051 pectinesterase [EC:3.1.1.11] | (RefSeq) probable pectinesterase/pectinesterase inhibitor 58 (A)
IFM89_014745	K01179 endoglucanase [EC:3.2.1.4] | (RefSeq) hypothetical protein (A)
IFM89_020629	K16221 transcription factor TCP21 (protein CCA1 HIKING EXPEDITION) | (RefSeq) transcription factor TCP21 isoform X2 (A)
IFM89_016128	K21596 calmodulin-binding transcription activator | (RefSeq) calmodulin-binding transcription activator 4-like (A)
IFM89_024851	K10999 cellulose synthase A [EC:2.4.1.12] | (RefSeq) cellulose synthase A catalytic subunit 9 [UDP-forming] (A)
IFM89_035490	K17471 sulfate transporter 3 | (RefSeq) probable sulfate transporter 3.3 (A)
IFM89_013994	K15407 queuine tRNA-ribosyltransferase accessory subunit | (RefSeq) hypothetical protein (A)
IFM89_010706	K08999 uncharacterized protein | (RefSeq) hypothetical protein (A)
IFM89_031861	K14515 EIN3-binding F-box protein | (RefSeq) EIN3-binding F-box protein 1 (A)
IFM89_003654	K09286 EREBP-like factor | (RefSeq) ethylene-responsive transcription factor ERF011-like (A)
IFM89_030957	K10268 F-box and leucine-rich repeat protein 2/20 | (RefSeq) F-box/LRR-repeat protein 3-like (A)
IFM89_026392	K03671 thioredoxin 1 | (RefSeq) uncharacterized protein LOC107403706 (A)
IFM89_006966	K13412 calcium-dependent protein kinase [EC:2.7.11.1] | (RefSeq) calcium-dependent protein kinase 8-like (A)
IFM89_033080	K11593 eukaryotic translation initiation factor 2C | (RefSeq) protein argonaute PNH1-like (A)
IFM89_006261	K00422 polyphenol oxidase [EC:1.10.3.1] | (RefSeq) polyphenol oxidase, chloroplastic-like (A)
IFM89_018635	K03070 preprotein translocase subunit SecA [EC:7.4.2.8] | (RefSeq) protein translocase subunit SECA1, chloroplastic (A)
IFM89_005863	K01267 aspartyl aminopeptidase [EC:3.4.11.21] | (RefSeq) probable aspartyl aminopeptidase (A)
IFM89_011292	K10532 heparan-alpha-glucosaminide N-acetyltransferase [EC:2.3.1.78] | (RefSeq) heparan-alpha-glucosaminide N-acetyltransferase-like isoform X1 (A)
IFM89_008058	K00688 glycogen phosphorylase [EC:2.4.1.1] | (RefSeq) alpha-1,4 glucan phosphorylase L-2 isozyme, chloroplastic/amyloplastic (A)
IFM89_018100	K19996 phosphatidylinositol transfer protein SFH5 | (RefSeq) patellin-3 (A)
IFM89_012573	K07375 tubulin beta | (RefSeq) tubulin beta chain (A)
IFM89_001847	K23280 rhamnogalacturonan I rhamnosyltransferase [EC:2.4.1.351] | (RefSeq) uncharacterized protein At1g04910-like (A)
IFM89_022468	K00759 adenine phosphoribosyltransferase [EC:2.4.2.7] | (RefSeq) adenine phosphoribosyltransferase 5 isoform X1 (A)
IFM89_008462	K24188 cytochrome P450 family 93 subfamily A [EC:1.14.-.-] | (RefSeq) cytochrome P450 93A3-like (A)
IFM89_007767	K05280 flavonoid 3'-monooxygenase [EC:1.14.14.82] | (RefSeq) flavonoid 3'-monooxygenase-like (A)
IFM89_004668	K01188 beta-glucosidase [EC:3.2.1.21] | (RefSeq) beta-glucosidase 12-like isoform X1 (A)
IFM89_010966	K23678 solute carrier family 66 (lysosomal lysine-arginine transporter), member 1 | (RefSeq) probable vacuolar amino acid transporter YPQ1 (A)
IFM89_037096	K22772 flavonol-3-O-glucoside L-rhamnosyltransferase [EC:2.4.1.159] | (RefSeq) anthocyanidin 3-O-glucosyltransferase-like (A)
IFM89_002006	K14432 ABA responsive element binding factor | (RefSeq) ABSCISIC ACID-INSENSITIVE 5-like protein 5 (A)
IFM89_029287	K07213 copper chaperone | (RefSeq) copper transport protein ATX1-like (A)
IFM89_029476	K17604 zinc finger SWIM domain-containing protein 3 | (RefSeq) protein FAR1-RELATED SEQUENCE 6-like (A)
IFM89_006127	K13258 2-hydroxyisoflavanone dehydratase [EC:4.2.1.105] | (RefSeq) uncharacterized protein LOC115994703 (A)
IFM89_029953	K00939 adenylate kinase [EC:2.7.4.3] | (RefSeq) probable adenylate kinase 7, mitochondrial (A)
IFM89_016567	K08999 uncharacterized protein | (RefSeq) bifunctional nuclease 2-like (A)
IFM89_002632	K12617 DNA topoisomerase 2-associated protein PAT1 | (RefSeq) protein PAT1 homolog (A)
IFM89_026138	K01184 polygalacturonase [EC:3.2.1.15] | (RefSeq) probable polygalacturonase At3g15720 (A)
IFM89_031309	K00026 malate dehydrogenase [EC:1.1.1.37] | (RefSeq) malate dehydrogenase, chloroplastic-like isoform X1 (A)
IFM89_038746	K00831 phosphoserine aminotransferase [EC:2.6.1.52] | (RefSeq) phosphoserine aminotransferase 2, chloroplastic-like (A)
IFM89_022307	K19891 glucan endo-1,3-beta-glucosidase 1/2/3 [EC:3.2.1.39] | (RefSeq) hypothetical protein (A)
IFM89_016535	K17338 receptor expression-enhancing protein 1/2/3/4 | (RefSeq) putative HVA22-like protein g isoform X1 (A)
IFM89_018609	K10775 phenylalanine ammonia-lyase [EC:4.3.1.24] | (RefSeq) phenylalanine ammonia-lyase (A)
IFM89_000580	K05909 laccase [EC:1.10.3.2] | (RefSeq) laccase-4-like (A)
IFM89_029065	K14504 xyloglucan:xyloglucosyl transferase TCH4 [EC:2.4.1.207] | (RefSeq) probable xyloglucan endotransglucosylase/hydrolase protein 23 (A)
IFM89_009083	K00670 N-alpha-acetyltransferase 30 [EC:2.3.1.256] | (RefSeq) N-alpha-acetyltransferase MAK3 (A)
IFM89_033162	K14376 poly(A) polymerase [EC:2.7.7.19] | (RefSeq) nuclear poly(A) polymerase 4-like (A)
IFM89_032849	K19045 E3 ubiquitin-protein ligase BIG BROTHER and related proteins [EC:2.3.2.27] | (RefSeq) E3 ubiquitin ligase BIG BROTHER-related-like (A)
IFM89_016480	K03676 glutaredoxin 3 | (RefSeq) monothiol glutaredoxin-S3-like (A)
IFM89_024488	K19996 phosphatidylinositol transfer protein SFH5 | (RefSeq) patellin-3 (A)
IFM89_019462	K15227 arogenate dehydrogenase (NADP+), plant [EC:1.3.1.78] | (RefSeq) arogenate dehydrogenase 2, chloroplastic-like (A)
IFM89_008136	K07199 5'-AMP-activated protein kinase, regulatory beta subunit | (RefSeq) SNF1-related protein kinase regulatory subunit beta-1-like (A)
IFM89_034548	K09286 EREBP-like factor | (RefSeq) ethylene-responsive transcription factor ERF105-like (A)
IFM89_022539	K22382 WD repeat-containing protein 26 | (RefSeq) WD repeat-containing protein 26 homolog (A)
IFM89_010632	K10579 ubiquitin-conjugating enzyme E2 M [EC:2.3.2.34] | (RefSeq) NEDD8-conjugating enzyme Ubc12-like (A)
IFM89_037388	K13384 (RS)-1-benzyl-1,2,3,4-tetrahydroisoquinoline N-methyltransferase [EC:2.1.1.115 2.1.1.140] | (RefSeq) (S)-coclaurine N-methyltransferase (A)
novel.4438	K01866 tyrosyl-tRNA synthetase [EC:6.1.1.1] | (RefSeq) tyrosine--tRNA ligase 1, cytoplasmic (A)
IFM89_015844	K03676 glutaredoxin 3 | (RefSeq) monothiol glutaredoxin-S10-like (A)
IFM89_018751	K01784 UDP-glucose 4-epimerase [EC:5.1.3.2] | (RefSeq) bifunctional UDP-glucose 4-epimerase and UDP-xylose 4-epimerase 1 (A)
novel.1362	K10406 kinesin family member C2/C3 | (RefSeq) kinesin-like protein KIN-14L (A)
IFM89_008685	K04733 interleukin-1 receptor-associated kinase 4 [EC:2.7.11.1] | (RefSeq) G-type lectin S-receptor-like serine/threonine-protein kinase RKS1 isoform X1 (A)
IFM89_037117	K05933 aminocyclopropanecarboxylate oxidase [EC:1.14.17.4] | (RefSeq) 1-aminocyclopropane-1-carboxylate oxidase (A)
IFM89_029861	K11883 RNA-binding protein NOB1 | (RefSeq) RNA-binding protein NOB1 isoform X1 (A)
IFM89_023647	K01251 adenosylhomocysteinase [EC:3.3.1.1] | (RefSeq) adenosylhomocysteinase (A)
novel.593	K13428 LRR receptor-like serine/threonine-protein kinase EFR [EC:2.7.11.1] | (RefSeq) hypothetical protein (A)
IFM89_018004	K05894 12-oxophytodienoic acid reductase [EC:1.3.1.42] | (RefSeq) 12-oxophytodienoate reductase 2-like (A)
IFM89_002698	K14499 BRI1 kinase inhibitor 1 | (RefSeq) BRI1 kinase inhibitor 1-like (A)
IFM89_032024	K00521 ferric-chelate reductase [EC:1.16.1.7] | (RefSeq) ferric reduction oxidase 8, mitochondrial (A)
IFM89_004629	K13379 reversibly glycosylated polypeptide / UDP-arabinopyranose mutase [EC:2.4.1.- 5.4.99.30] | (RefSeq) alpha-1,4-glucan-protein synthase [UDP-forming] 2-like (A)
IFM89_034758	K10775 phenylalanine ammonia-lyase [EC:4.3.1.24] | (RefSeq) phenylalanine ammonia-lyase (A)
IFM89_015177	K12812 ATP-dependent RNA helicase UAP56/SUB2 [EC:3.6.4.13] | (RefSeq) ATP-dependent RNA helicase MAK5-like (A)
IFM89_027461	K08864 tousled-like kinase [EC:2.7.11.1] | (RefSeq) serine/threonine-protein kinase TOUSLED-like isoform X1 (A)
IFM89_010014	K17302 coatomer subunit beta' | (RefSeq) uncharacterized protein LOC123140106 (A)
IFM89_030785	K01968 3-methylcrotonyl-CoA carboxylase alpha subunit [EC:6.4.1.4] | (RefSeq) LOW QUALITY PROTEIN: methylcrotonoyl-CoA carboxylase subunit alpha, mitochondrial (A)
IFM89_008926	K03122 transcription initiation factor TFIIA large subunit | (RefSeq) uncharacterized protein LOC114825099 (A)
IFM89_023610	K17592 sacsin | (RefSeq) sacsin-like (A)
IFM89_011511	K00826 branched-chain amino acid aminotransferase [EC:2.6.1.42] | (RefSeq) branched-chain-amino-acid aminotransferase 2, chloroplastic-like (A)
IFM89_009468	K03327 multidrug resistance protein, MATE family | (RefSeq) protein DETOXIFICATION 33-like (A)
IFM89_032585	K14506 jasmonic acid-amino synthetase [EC:6.3.2.52] | (RefSeq) uncharacterized LOC109115461 (A)
IFM89_026031	K14431 transcription factor TGA | (RefSeq) transcription factor TGA2.2-like (A)
IFM89_014053	K01256 aminopeptidase N [EC:3.4.11.2] | (RefSeq) puromycin-sensitive aminopeptidase-like (A)
IFM89_039815	K01593 aromatic-L-amino-acid/L-tryptophan decarboxylase [EC:4.1.1.28 4.1.1.105] | (RefSeq) tyrosine/DOPA decarboxylase 2-like (A)
IFM89_023101	K13383 (RS)-norcoclaurine 6-O-methyltransferase [EC:2.1.1.128] | (RefSeq) (RS)-norcoclaurine 6-O-methyltransferase-like (A)
IFM89_016616	K12120 phytochrome A | (RefSeq) PHYA; phytochrome A (A)
IFM89_038314	K11673 actin-related protein 8 | (RefSeq) actin-related protein 9-like (A)
IFM89_015541	K12819 pre-mRNA-processing factor SLU7 | (RefSeq) pre-mRNA-splicing factor SLU7 (A)
IFM89_023100	K13385 N-methylcoclaurine 3'-monooxygenase [EC:1.14.14.102] | (RefSeq) (S)-N-methylcoclaurine 3'-hydroxylase isozyme 1 (A)
IFM89_010054	K23136 fraxetin 5-hydroxylase [EC:1.14.14.164] | (RefSeq) uncharacterized LOC105769156 (A)
IFM89_003751	K16190 glucuronokinase [EC:2.7.1.43] | (RefSeq) transcription factor TDR (A)
IFM89_022703	K00521 ferric-chelate reductase [EC:1.16.1.7] | (RefSeq) ferric reduction oxidase 7, chloroplastic-like (A)
novel.2349	K13356 alcohol-forming fatty acyl-CoA reductase [EC:1.2.1.84] | (RefSeq) fatty acyl-CoA reductase 2 (A)
IFM89_039615	K09753 cinnamoyl-CoA reductase [EC:1.2.1.44] | (RefSeq) cinnamoyl-CoA reductase 1-like (A)
IFM89_037826	K02959 small subunit ribosomal protein S16 | (RefSeq) 30S ribosomal protein S16-2, chloroplastic/mitochondrial-like (A)
IFM89_030333	K00131 glyceraldehyde-3-phosphate dehydrogenase (NADP+) [EC:1.2.1.9] | (RefSeq) NADP-dependent glyceraldehyde-3-phosphate dehydrogenase isoform X1 (A)
IFM89_007361	K00297 methylenetetrahydrofolate reductase (NADH) [EC:1.5.1.54] | (RefSeq) methylenetetrahydrofolate reductase 1 (A)
IFM89_033148	K10781 fatty acyl-ACP thioesterase B [EC:3.1.2.14 3.1.2.21] | (RefSeq) uncharacterized protein LOC113347984 isoform X1 (A)
IFM89_035697	K14485 transport inhibitor response 1 | (RefSeq) protein TRANSPORT INHIBITOR RESPONSE 1-like (A)
IFM89_038459	K12811 ATP-dependent RNA helicase DDX46/PRP5 [EC:3.6.4.13] | (RefSeq) DEAD-box ATP-dependent RNA helicase 42-like (A)
IFM89_019880	K22683 aspartyl protease family protein [EC:3.4.23.-] | (RefSeq) protein ASPARTIC PROTEASE IN GUARD CELL 1 (A)
IFM89_014779	K11498 centromeric protein E | (RefSeq) kinesin-like protein KIN-7D, mitochondrial (A)
IFM89_025630	K01809 mannose-6-phosphate isomerase [EC:5.3.1.8] | (RefSeq) mannose-6-phosphate isomerase 1-like isoform X1 (A)
IFM89_037011	K22794 flavonol-3-O-glucoside/galactoside glucosyltransferase [EC:2.4.1.239 2.4.1.-] | (RefSeq) anthocyanidin 3-O-glucoside 2''-O-glucosyltransferase-like (A)
IFM89_020866	K14494 DELLA protein | (RefSeq) DELLA protein GAI1-like (A)
novel.2751	K16871 4-aminobutyrate---pyruvate transaminase [EC:2.6.1.96] | (Kazusa) Lj3g3v3569310.2; - (A)
IFM89_030786	K01968 3-methylcrotonyl-CoA carboxylase alpha subunit [EC:6.4.1.4] | (RefSeq) methylcrotonoyl-CoA carboxylase subunit alpha, mitochondrial-like isoform X1 (A)
IFM89_002801	K13396 (S)-tetrahydroprotoberberine N-methyltransferase [EC:2.1.1.122] | (RefSeq) (S)-tetrahydroprotoberberine N-methyltransferase-like (A)
IFM89_033569	K00815 tyrosine aminotransferase [EC:2.6.1.5] | (RefSeq) probable aminotransferase TAT2 (A)
IFM89_016697	K15040 voltage-dependent anion channel protein 2 | (RefSeq) mitochondrial outer membrane protein porin 2-like (A)
IFM89_028764	K10999 cellulose synthase A [EC:2.4.1.12] | (RefSeq) cellulose synthase A catalytic subunit 7 [UDP-forming] (A)
IFM89_031971	K00487 trans-cinnamate 4-monooxygenase [EC:1.14.14.91] | (RefSeq) trans-cinnamate 4-monooxygenase (A)
novel.3938	K10640 E3 ubiquitin-protein ligase RNF25 [EC:2.3.2.27] | (RefSeq) uncharacterized protein LOC118034067 (A)
IFM89_023651	K17285 methanethiol oxidase [EC:1.8.3.4] | (RefSeq) selenium-binding protein 2 (A)
IFM89_012660	K05294 GPI inositol-deacylase [EC:3.-.-.-] | (RefSeq) uncharacterized LOC104597479 (A)
IFM89_023660	K09419 heat shock transcription factor, other eukaryote | (RefSeq) heat stress transcription factor A-5 (A)
IFM89_003847	K00521 ferric-chelate reductase [EC:1.16.1.7] | (RefSeq) ferric reduction oxidase 7, chloroplastic-like (A)
IFM89_030686	K07300 Ca2+:H+ antiporter | (RefSeq) vacuolar cation/proton exchanger 2-like isoform X1 (A)
IFM89_002797	K14975 codeine 3-O-demethylase [EC:1.14.11.32] | (RefSeq) codeine O-demethylase (A)
IFM89_003734	K01626 3-deoxy-7-phosphoheptulonate synthase [EC:2.5.1.54] | (RefSeq) phospho-2-dehydro-3-deoxyheptonate aldolase 2, chloroplastic-like (A)
novel.3049	K05387 glutamate receptor, ionotropic, plant | (RefSeq) glutamate receptor 1.3-like (A)
IFM89_007051	K14485 transport inhibitor response 1 | (RefSeq) protein TRANSPORT INHIBITOR RESPONSE 1-like (A)
IFM89_030194	K10256 omega-6 fatty acid desaturase / acyl-lipid omega-6 desaturase (Delta-12 desaturase) [EC:1.14.19.6 1.14.19.22] | (RefSeq) delta(12)-fatty-acid desaturase FAD2 (A)
IFM89_035656	K13435 serine/threonine-protein kinase Pto | (RefSeq) Pto; serine/threonine protein kinase Pto (A)
IFM89_034510	K09338 homeobox-leucine zipper protein | (RefSeq) homeobox-leucine zipper protein HAT4-like (A)
IFM89_011384	K10666 E3 ubiquitin-protein ligase RNF5 [EC:2.3.2.27] | (RefSeq) E3 ubiquitin-protein ligase RMA1H1-like (A)
IFM89_031810	K23869 galactan beta-1,4-galactosyltransferase [EC:2.4.1.-] | (RefSeq) galactan beta-1,4-galactosyltransferase GALS1 (A)
IFM89_020489	K12135 zinc finger protein CONSTANS | (RefSeq) zinc finger protein CONSTANS-like (A)
IFM89_002045	K13070 momilactone-A synthase [EC:1.1.1.295] | (RefSeq) momilactone A synthase (A)
IFM89_002260	K17471 sulfate transporter 3 | (RefSeq) sulfate transporter 3.1-like (A)
IFM89_031724	K00800 3-phosphoshikimate 1-carboxyvinyltransferase [EC:2.5.1.19] | (RefSeq) 3-phosphoshikimate 1-carboxyvinyltransferase 2 (A)
IFM89_023766	K15255 ATP-dependent DNA helicase PIF1 [EC:5.6.2.3] | (RefSeq) ATP-dependent DNA helicase PIF1-like (A)
IFM89_024239	K10526 OPC-8:0 CoA ligase 1 [EC:6.2.1.-] | (RefSeq) probable CoA ligase CCL5 (A)
IFM89_006425	K13192 RNA-binding protein 26 | (RefSeq) zinc finger CCCH domain-containing protein 27 (A)
IFM89_020842	K16055 trehalose 6-phosphate synthase/phosphatase [EC:2.4.1.15 3.1.3.12] | (RefSeq) alpha,alpha-trehalose-phosphate synthase [UDP-forming] 6-like (A)
IFM89_007513	K17255 Rab GDP dissociation inhibitor | (RefSeq) guanosine nucleotide diphosphate dissociation inhibitor At5g09550 (A)
IFM89_027593	K02638 plastocyanin | (RefSeq) plastocyanin (A)
IFM89_032689	K10144 RING finger and CHY zinc finger domain-containing protein 1 [EC:2.3.2.27] | (RefSeq) probable E3 ubiquitin-protein ligase RZFP34 (A)
IFM89_038224	K12309 beta-galactosidase [EC:3.2.1.23] | (Kazusa) Lj3g3v0323160.1; - (A)
IFM89_016084	K00422 polyphenol oxidase [EC:1.10.3.1] | (RefSeq) polyphenol oxidase I, chloroplastic-like (A)
IFM89_025233	K08914 light-harvesting complex II chlorophyll a/b binding protein 3 | (RefSeq) chlorophyll a-b binding protein 13, chloroplastic-like (A)
IFM89_037843	K01051 pectinesterase [EC:3.1.1.11] | (RefSeq) probable pectinesterase/pectinesterase inhibitor 58 (A)
IFM89_026273	K03860 phosphatidylinositol N-acetylglucosaminyltransferase subunit Q | (RefSeq) N-acetylglucosaminyl-phosphatidylinositol biosynthetic protein gpi1-like (A)
IFM89_002181	K08790 serine/threonine kinase 38 [EC:2.7.11.1] | (RefSeq) serine/threonine-protein kinase 38-like (A)
IFM89_035122	K18819 inositol 3-alpha-galactosyltransferase [EC:2.4.1.123] | (RefSeq) galactinol synthase 1 (A)
IFM89_029119	K17500 integrin-linked kinase-associated serine/threonine phosphatase 2C [EC:3.1.3.16] | (RefSeq) WAT1-related protein At3g18200-like (A)
IFM89_006661	K13386 3'-hydroxy-N-methyl-(S)-coclaurine 4'-O-methyltransferase [EC:2.1.1.116] | (RefSeq) 3'-hydroxy-N-methyl-(S)-coclaurine 4'-O-methyltransferase 2 (A)
IFM89_036288	K17500 integrin-linked kinase-associated serine/threonine phosphatase 2C [EC:3.1.3.16] | (RefSeq) WAT1-related protein At3g18200-like (A)
IFM89_034484	K15227 arogenate dehydrogenase (NADP+), plant [EC:1.3.1.78] | (RefSeq) arogenate dehydrogenase 1, chloroplastic (A)
IFM89_033096	K08711 ATP-binding cassette, subfamily G (WHITE), member 2, PDR | (RefSeq) LOW QUALITY PROTEIN: ZEB2-regulated ABC transporter 1-like (A)
IFM89_009445	K06130 lysophospholipase II [EC:3.1.1.5] | (RefSeq) acyl-protein thioesterase 2-like (A)
IFM89_015207	K17795 mitochondrial import inner membrane translocase subunit TIM17 | (RefSeq) mitochondrial import inner membrane translocase subunit TIM17-2-like (A)
IFM89_020028	K14685 solute carrier family 40 (iron-regulated transporter), member 1 | (RefSeq) solute carrier family 40 member 2-like isoform X1 (A)
IFM89_024357	K05681 ATP-binding cassette, subfamily G (WHITE), member 2 | (RefSeq) ABC transporter, ATP-binding protein isoform 1 (A)
IFM89_012587	K15030 translation initiation factor 3 subunit M | (RefSeq) eukaryotic translation initiation factor 3 subunit M-like (A)
IFM89_013313	K07375 tubulin beta | (RefSeq) tubulin beta-2 chain (A)
IFM89_008086	K01188 beta-glucosidase [EC:3.2.1.21] | (RefSeq) beta-glucosidase 40 (A)
IFM89_001583	K02634 apocytochrome f | (RefSeq) chaperone protein DnaJ (A)
IFM89_013275	K01580 glutamate decarboxylase [EC:4.1.1.15] | (RefSeq) glutamate decarboxylase 1 (A)
novel.2436	K02933 large subunit ribosomal protein L6 | (RefSeq) 50S ribosomal protein L6, chloroplastic (A)
IFM89_009669	K08066 nuclear transcription factor Y, gamma | (RefSeq) nuclear transcription factor Y subunit C-9 (A)
IFM89_006980	K00106 xanthine dehydrogenase/oxidase [EC:1.17.1.4 1.17.3.2] | (RefSeq) xanthine dehydrogenase 1-like isoform X1 (A)
IFM89_032428	K18422 helicase MOV-10 [EC:3.6.4.13] | (RefSeq) probable RNA helicase SDE3 (A)
IFM89_027696	K20617 cytochrome P450 family 71 subfamily A | (RefSeq) cytochrome P450 71A9-like (A)
IFM89_012148	K01051 pectinesterase [EC:3.1.1.11] | (RefSeq) pectinesterase (A)
IFM89_003386	K23260 scopoletin glucosyltransferase [EC:2.4.1.128] | (RefSeq) scopoletin glucosyltransferase (A)
novel.2381	K09338 homeobox-leucine zipper protein | (RefSeq) homeobox-leucine zipper protein MERISTEM L1 (A)
IFM89_028656	K08235 xyloglucan:xyloglucosyl transferase [EC:2.4.1.207] | (RefSeq) xyloglucan endotransglucosylase/hydrolase 2-like (A)
IFM89_000343	K06268 serine/threonine-protein phosphatase 2B regulatory subunit | (RefSeq) uncharacterized protein LOC109740273 (A)
IFM89_001539	K13141 integrator complex subunit 4 | (RefSeq) protein SIEL-like (A)
IFM89_039663	K13430 serine/threonine-protein kinase PBS1 [EC:2.7.11.1] | (RefSeq) serine/threonine-protein kinase CDL1-like (A)
IFM89_003576	K13413 mitogen-activated protein kinase kinase 4/5 [EC:2.7.12.2] | (RefSeq) mitogen-activated protein kinase kinase 5-like (A)
IFM89_026374	K16281 RING-H2 zinc finger protein RHA1 | (RefSeq) E3 ubiquitin-protein ligase ATL4 (A)
IFM89_037587	K14674 TAG lipase / steryl ester hydrolase / phospholipase A2 / LPA acyltransferase [EC:3.1.1.3 3.1.1.13 3.1.1.4 2.3.1.51] | (RefSeq) triacylglycerol lipase SDP1 (A)
IFM89_013778	K02930 large subunit ribosomal protein L4e | (RefSeq) 60S ribosomal protein L4-like (A)
IFM89_032926	K06123 1-acylglycerone phosphate reductase [EC:1.1.1.101] | (RefSeq) hypothetical protein (A)
IFM89_037861	K19040 E3 ubiquitin-protein ligase ATL10/75/76/77/78 [EC:2.3.2.27] | (RefSeq) RING-H2 finger protein ATL79 (A)
IFM89_005217	K23136 fraxetin 5-hydroxylase [EC:1.14.14.164] | (RefSeq) cytochrome P450 CYP82D47-like (A)
IFM89_018855	K08818 cell division cycle 2-like [EC:2.7.11.22] | (RefSeq) cyclin-dependent kinase G-2 (A)
IFM89_032113	K21692 methyltetrahydroprotoberberine 14-monooxygenase [EC:1.14.14.97] | (RefSeq) methyltetrahydroprotoberberine 14-monooxygenase (A)
IFM89_011801	K15306 Ran-binding protein 1 | (RefSeq) ran-binding protein 1 homolog b (A)
IFM89_002703	K15188 cyclin T | (RefSeq) cyclin-T1-4-like (A)
IFM89_008416	K22846 S-sulfo-L-cysteine synthase (O-acetyl-L-serine-dependent) [EC:2.5.1.144] | (RefSeq) probable arabinosyltransferase ARAD1 (A)
IFM89_013502	K00549 5-methyltetrahydropteroyltriglutamate--homocysteine methyltransferase [EC:2.1.1.14] | (RefSeq) 5-methyltetrahydropteroyltriglutamate--homocysteine methyltransferase (A)
IFM89_035125	K22068 iron-sulfur cluster assembly enzyme ISCU, mitochondrial | (RefSeq) iron-sulfur cluster assembly protein 1-like (A)
IFM89_012090	K11838 ubiquitin carboxyl-terminal hydrolase 7 [EC:3.4.19.12] | (RefSeq) ubiquitin carboxyl-terminal hydrolase 12-like isoform X1 (A)
IFM89_003729	K00020 3-hydroxyisobutyrate dehydrogenase [EC:1.1.1.31] | (GenBank) 6-phosphogluconate dehydrogenase-like protein (A)
IFM89_013261	K09338 homeobox-leucine zipper protein | (RefSeq) homeobox-leucine zipper protein ATHB-13-like (A)
IFM89_035055	K14485 transport inhibitor response 1 | (RefSeq) protein TRANSPORT INHIBITOR RESPONSE 1-like (A)
novel.1088	K18158 nuclear control of ATPase protein 2 | (RefSeq) protein DGS1, mitochondrial-like (A)
IFM89_037705	K14638 solute carrier family 15 (peptide/histidine transporter), member 3/4 | (RefSeq) protein NRT1/ PTR FAMILY 5.10-like (A)
IFM89_001660	K08272 calcium binding protein 39 | (RefSeq) putative MO25-like protein At5g47540 (A)
IFM89_032856	K22983 cytochrome P450 family 76 subfamily A | (RefSeq) cytochrome P450 76A2-like (A)
IFM89_033338	K11252 histone H2B | (RefSeq) histone H2B.3-like (A)
IFM89_019834	K20718 LRR receptor-like serine/threonine-protein kinase ERECTA [EC:2.7.11.1] | (RefSeq) LRR receptor-like serine/threonine-protein kinase ERECTA isoform X1 (A)
IFM89_022334	K14494 DELLA protein | (RefSeq) DELLA protein RGL1 (A)
IFM89_022594	K00826 branched-chain amino acid aminotransferase [EC:2.6.1.42] | (RefSeq) branched-chain-amino-acid aminotransferase 3, chloroplastic-like (A)
IFM89_018667	K12667 oligosaccharyltransferase complex subunit delta (ribophorin II) | (RefSeq) dolichyl-diphosphooligosaccharide--protein glycosyltransferase subunit 2 (A)
IFM89_016955	K03676 glutaredoxin 3 | (RefSeq) monothiol glutaredoxin-S2-like (A)
IFM89_007493	K07213 copper chaperone | (RefSeq) hypothetical protein (A)
novel.4019	K12448 UDP-arabinose 4-epimerase [EC:5.1.3.5] | (RefSeq) UDP-arabinose 4-epimerase 1-like (A)
IFM89_013505	K00549 5-methyltetrahydropteroyltriglutamate--homocysteine methyltransferase [EC:2.1.1.14] | (RefSeq) 5-methyltetrahydropteroyltriglutamate--homocysteine methyltransferase (A)
IFM89_012607	K21692 methyltetrahydroprotoberberine 14-monooxygenase [EC:1.14.14.97] | (RefSeq) methyltetrahydroprotoberberine 14-monooxygenase (A)
novel.505	K14175 (3S,6E)-nerolidol synthase [EC:4.2.3.48] | (RefSeq) (3S,6E)-nerolidol synthase 1-like (A)
IFM89_009078	K12900 serine/arginine-rich splicing factor 10 | (RefSeq) serine/arginine-rich SC35-like splicing factor SCL30A (A)
IFM89_000261	K06676 condensin complex subunit 2 | (RefSeq) condensin complex subunit 2-like (A)
IFM89_003009	K01229 lactase-phlorizin hydrolase [EC:3.2.1.108 3.2.1.62] | (RefSeq) uncharacterized protein LOC119987970 (A)
IFM89_039506	K03011 DNA-directed RNA polymerase II subunit RPB3 | (RefSeq) DNA-directed RNA polymerases II, IV and V subunit 3-like (A)
IFM89_005636	K14837 nucleolar protein 12 | (RefSeq) nucleolar protein 12 (A)
IFM89_001316	K13342 peroxin-5 | (RefSeq) peroxisome biogenesis protein 5 isoform X2 (A)
IFM89_033994	K13946 auxin influx carrier (AUX1 LAX family) | (RefSeq) auxin transporter-like protein 5 (A)
IFM89_034316	K01051 pectinesterase [EC:3.1.1.11] | (RefSeq) pectinesterase-like (A)
IFM89_015809	K03522 electron transfer flavoprotein alpha subunit | (RefSeq) electron transfer flavoprotein subunit alpha, mitochondrial (A)
IFM89_032090	K23717 solute carrier family 23 (nucleobase transporter), member 2 | (RefSeq) nucleobase-ascorbate transporter 4 isoform X1 (A)
IFM89_017833	K03327 multidrug resistance protein, MATE family | (RefSeq) protein DETOXIFICATION 33-like (A)
novel.8210	K11982 E3 ubiquitin-protein ligase RNF115/126 [EC:2.3.2.27] | (RefSeq) probable E3 ubiquitin-protein ligase RHC1A (A)
IFM89_025976	K02923 large subunit ribosomal protein L38e | (RefSeq) 60S ribosomal protein L38 (A)
IFM89_031837	K01595 phosphoenolpyruvate carboxylase [EC:4.1.1.31] | (RefSeq) phosphoenolpyruvate carboxylase 2 (A)
IFM89_038463	K22395 cinnamyl-alcohol dehydrogenase [EC:1.1.1.195] | (RefSeq) berberine bridge enzyme-like 13 (A)
IFM89_011834	K24687 AN1-type zinc finger protein 5/6 | (RefSeq) AN1-type zinc finger protein 5-like (A)
IFM89_004531	K13449 pathogenesis-related protein 1 | (RefSeq) pathogenesis-related protein 1-like (A)
IFM89_036323	K01904 4-coumarate--CoA ligase [EC:6.2.1.12] | (RefSeq) 4-coumarate--CoA ligase-like 6 (A)
IFM89_023664	K00600 glycine hydroxymethyltransferase [EC:2.1.2.1] | (RefSeq) serine hydroxymethyltransferase 4 (A)
IFM89_036508	K08472 mlo protein | (RefSeq) MLO-like protein 11 (A)
IFM89_007681	K22683 aspartyl protease family protein [EC:3.4.23.-] | (RefSeq) protein ASPARTIC PROTEASE IN GUARD CELL 1-like (A)
IFM89_024126	K11968 ariadne-1 [EC:2.3.2.31] | (RefSeq) probable E3 ubiquitin-protein ligase ARI2 isoform X1 (A)
IFM89_008957	K14004 protein transport protein SEC13 | (RefSeq) protein transport protein SEC13 homolog B-like (A)
IFM89_000614	K13382 (S)-norcoclaurine synthase [EC:4.2.1.78] | (RefSeq) uncharacterized protein LOC113326100 (A)
IFM89_018471	K01102 pyruvate dehydrogenase phosphatase [EC:3.1.3.43] | (RefSeq) probable protein phosphatase 2C 38 (A)
IFM89_038092	K19882 O-palmitoleoyl-L-serine hydrolase [EC:3.1.1.98] | (RefSeq) pectin acetylesterase 10 (A)
IFM89_028800	K00799 glutathione S-transferase [EC:2.5.1.18] | (RefSeq) glutathione S-transferase F10-like (A)
IFM89_034610	K01206 alpha-L-fucosidase [EC:3.2.1.51] | (RefSeq) alpha-L-fucosidase 3 (A)
IFM89_011353	K16296 serine carboxypeptidase-like clade I [EC:3.4.16.-] | (RefSeq) serine carboxypeptidase-like 15 (A)
IFM89_002663	K15718 linoleate 9S-lipoxygenase [EC:1.13.11.58] | (RefSeq) probable linoleate 9S-lipoxygenase 5 (A)
IFM89_007922	K16547 protein NEDD1 | (RefSeq) hypothetical protein (A)
IFM89_004908	K03444 MFS transporter, SP family, ERD6-like sugar transporter | (RefSeq) sugar transporter ERD6-like 4 (A)
IFM89_037181	K13201 nucleolysin TIA-1/TIAR | (RefSeq) hypothetical protein (A)
IFM89_022002	K09286 EREBP-like factor | (RefSeq) ethylene-responsive transcription factor RAP2-4-like (A)
IFM89_006109	K08912 light-harvesting complex II chlorophyll a/b binding protein 1 | (RefSeq) chlorophyll a-b binding protein of LHCII type 1-like (A)
IFM89_039102	K17609 nucleoredoxin [EC:1.8.1.8] | (RefSeq) probable nucleoredoxin 3 (A)
IFM89_016685	K19891 glucan endo-1,3-beta-glucosidase 1/2/3 [EC:3.2.1.39] | (RefSeq) hypothetical protein (A)
IFM89_037985	K22262 WD repeat and FYVE domain-containing protein 3 | (RefSeq) protein SPIRRIG (A)
IFM89_025569	K03405 magnesium chelatase subunit I [EC:6.6.1.1] | (RefSeq) magnesium-chelatase subunit ChlI, chloroplastic (A)
IFM89_000506	K00430 peroxidase [EC:1.11.1.7] | (RefSeq) peroxidase 21 (A)
IFM89_015017	K08955 ATP-dependent metalloprotease [EC:3.4.24.-] | (RefSeq) ATP-dependent zinc metalloprotease FTSH 11, chloroplastic/mitochondrial-like (A)
IFM89_002800	K13383 (RS)-norcoclaurine 6-O-methyltransferase [EC:2.1.1.128] | (RefSeq) (RS)-norcoclaurine 6-O-methyltransferase-like (A)
IFM89_012552	K00161 pyruvate dehydrogenase E1 component alpha subunit [EC:1.2.4.1] | (RefSeq) pyruvate dehydrogenase E1 component subunit alpha-3, chloroplastic-like (A)
IFM89_021790	K19791 iron transport multicopper oxidase | (RefSeq) L-ascorbate oxidase homolog (A)
novel.8144	K00021 hydroxymethylglutaryl-CoA reductase (NADPH) [EC:1.1.1.34] | (RefSeq) 3-hydroxy-3-methylglutaryl-coenzyme A reductase 1-like (A)
IFM89_008166	K13379 reversibly glycosylated polypeptide / UDP-arabinopyranose mutase [EC:2.4.1.- 5.4.99.30] | (RefSeq) alpha-1,4-glucan-protein synthase [UDP-forming] 2-like (A)
IFM89_037698	K10406 kinesin family member C2/C3 | (RefSeq) kinesin-like protein KIN-14J (A)
IFM89_017984	K09422 transcription factor MYB, plant | (RefSeq) myb-related protein Myb4 (A)
IFM89_006828	K01179 endoglucanase [EC:3.2.1.4] | (RefSeq) endoglucanase 9-like (A)
IFM89_007623	K13383 (RS)-norcoclaurine 6-O-methyltransferase [EC:2.1.1.128] | (RefSeq) (RS)-norcoclaurine 6-O-methyltransferase-like (A)
IFM89_002155	K15121 solute carrier family 25, member 44 | (RefSeq) solute carrier family 25 member 44-like (A)
IFM89_011673	K19037 E3 ubiquitin-protein ligase ATL23 [EC:2.3.2.27] | (RefSeq) E3 ubiquitin-protein ligase ATL23-like (A)
IFM89_038631	K00422 polyphenol oxidase [EC:1.10.3.1] | (RefSeq) aureusidin synthase-like (A)
IFM89_016403	K10781 fatty acyl-ACP thioesterase B [EC:3.1.2.14 3.1.2.21] | (RefSeq) uncharacterized protein LOC113347984 isoform X1 (A)
IFM89_005286	K23095 demethylphylloquinol methyltransferase [EC:2.1.1.329] | (RefSeq) 2-phytyl-1,4-beta-naphthoquinone methyltransferase, chloroplastic-like (A)
IFM89_033908	K15382 solute carrier family 50 (sugar transporter) | (RefSeq) bidirectional sugar transporter SWEET14 (A)
IFM89_002001	K09838 zeaxanthin epoxidase [EC:1.14.15.21] | (RefSeq) zeaxanthin epoxidase, chloroplastic (A)
IFM89_015237	K12449 UDP-apiose/xylose synthase | (RefSeq) UDP-D-apiose/UDP-D-xylose synthase 2 (A)
novel.6860	K01410 mitochondrial intermediate peptidase [EC:3.4.24.59] | (RefSeq) probable mitochondrial intermediate peptidase, mitochondrial (A)
IFM89_006728	K04563 cyclin-dependent kinase [EC:2.7.11.22] | (RefSeq) cyclin-dependent kinase G-2-like (A)
IFM89_037118	K02865 large subunit ribosomal protein L10Ae | (RefSeq) 60S ribosomal protein L10a (A)
IFM89_019192	K20617 cytochrome P450 family 71 subfamily A | (RefSeq) cytochrome P450 71A1-like (A)
IFM89_028155	K02433 aspartyl-tRNA(Asn)/glutamyl-tRNA(Gln) amidotransferase subunit A [EC:6.3.5.6 6.3.5.7] | (RefSeq) Glutamyl-tRNA(Gln) amidotransferase subunit A (A)
IFM89_001628	K01051 pectinesterase [EC:3.1.1.11] | (RefSeq) pectinesterase-like (A)
IFM89_012802	K19784 chromate reductase, NAD(P)H dehydrogenase (quinone) | (RefSeq) NADPH:quinone oxidoreductase-like (A)
IFM89_009200	K09286 EREBP-like factor | (RefSeq) ethylene-responsive transcription factor 2-like (A)
IFM89_005737	K03860 phosphatidylinositol N-acetylglucosaminyltransferase subunit Q | (RefSeq) N-acetylglucosaminyl-phosphatidylinositol biosynthetic protein gpi1-like (A)
IFM89_023483	K16297 serine carboxypeptidase-like clade II [EC:3.4.16.-] | (RefSeq) LOW QUALITY PROTEIN: serine carboxypeptidase-like 27 (A)
novel.6141	K22138 mitochondrial pyruvate carrier 1 | (RefSeq) mitochondrial pyruvate carrier 1 isoform X1 (A)
IFM89_004670	K01188 beta-glucosidase [EC:3.2.1.21] | (RefSeq) beta-glucosidase 12-like (A)
IFM89_023154	K16055 trehalose 6-phosphate synthase/phosphatase [EC:2.4.1.15 3.1.3.12] | (RefSeq) probable alpha,alpha-trehalose-phosphate synthase [UDP-forming] 7 (A)
IFM89_002891	K18422 helicase MOV-10 [EC:3.6.4.13] | (RefSeq) probable RNA helicase SDE3 (A)
IFM89_002813	K21693 protopine 6-monooxygenase [EC:1.14.14.98] | (RefSeq) protopine 6-monooxygenase-like (A)
IFM89_018021	K05894 12-oxophytodienoic acid reductase [EC:1.3.1.42] | (RefSeq) 12-oxophytodienoate reductase 2-like (A)
IFM89_027023	K20617 cytochrome P450 family 71 subfamily A | (RefSeq) cytochrome P450 71A1-like (A)
IFM89_005627	K14491 two-component response regulator ARR-B family | (RefSeq) two-component response regulator ARR2-like (A)
IFM89_036810	K17500 integrin-linked kinase-associated serine/threonine phosphatase 2C [EC:3.1.3.16] | (RefSeq) WAT1-related protein At3g18200 isoform X1 (A)
IFM89_021552	K12135 zinc finger protein CONSTANS | (RefSeq) zinc finger protein CONSTANS-LIKE 2-like (A)
IFM89_037153	K00924 kinase [EC:2.7.1.-] | (RefSeq) probable serine/threonine-protein kinase Cx32, chloroplastic (A)
IFM89_008212	K02291 15-cis-phytoene synthase [EC:2.5.1.32] | (RefSeq) phytoene synthase 2, chloroplastic (A)
IFM89_023300	K03327 multidrug resistance protein, MATE family | (RefSeq) protein DETOXIFICATION 40-like (A)
IFM89_003476	K00924 kinase [EC:2.7.1.-] | (RefSeq) probable serine/threonine-protein kinase PBL19 (A)
IFM89_021705	K12133 MYB-related transcription factor LHY | (RefSeq) protein CCA1 (A)
IFM89_024002	K16292 KDEL-tailed cysteine endopeptidase [EC:3.4.22.-] | (RefSeq) senescence-specific cysteine protease SAG39-like (A)
IFM89_011974	K09487 heat shock protein 90kDa beta | (RefSeq) endoplasmin homolog isoform X1 (A)
IFM89_018143	K00799 glutathione S-transferase [EC:2.5.1.18] | (RefSeq) glutathione S-transferase F13 (A)
IFM89_012231	K13354 solute carrier family 25 (peroxisomal adenine nucleotide transporter), member 17 | (RefSeq) peroxisomal nicotinamide adenine dinucleotide carrier-like (A)
IFM89_006860	K11498 centromeric protein E | (RefSeq) kinesin-like protein KIN-7E (A)
IFM89_034940	K10290 F-box protein 3 | (RefSeq) F-box protein SKIP16 isoform X1 (A)
IFM89_032183	K13430 serine/threonine-protein kinase PBS1 [EC:2.7.11.1] | (RefSeq) serine/threonine-protein kinase PBS1-like (A)
IFM89_018163	K15397 3-ketoacyl-CoA synthase [EC:2.3.1.199] | (RefSeq) 3-ketoacyl-CoA synthase 17-like (A)
IFM89_001627	K01051 pectinesterase [EC:3.1.1.11] | (RefSeq) pectinesterase-like (A)
IFM89_038001	K20495 long-chain fatty acid omega-monooxygenase [EC:1.14.14.80] | (RefSeq) cytochrome P450 704B1-like (A)
IFM89_028659	K12450 UDP-glucose 4,6-dehydratase [EC:4.2.1.76] | (RefSeq) trifunctional UDP-glucose 4,6-dehydratase/UDP-4-keto-6-deoxy-D-glucose 3,5-epimerase/UDP-4-keto-L-rhamnose-reductase RHM1 (A)
IFM89_035749	K22382 WD repeat-containing protein 26 | (RefSeq) WD repeat-containing protein 26 homolog (A)
novel.8586	K01858 myo-inositol-1-phosphate synthase [EC:5.5.1.4] | (RefSeq) inositol-3-phosphate synthase (A)
IFM89_020932	K01304 pyroglutamyl-peptidase [EC:3.4.19.3] | (RefSeq) pyrrolidone-carboxylate peptidase-like isoform X1 (A)
novel.8968	K06630 14-3-3 protein epsilon | (RefSeq) 14-3-3-like protein D (A)
IFM89_012604	K14975 codeine 3-O-demethylase [EC:1.14.11.32] | (RefSeq) codeine O-demethylase (A)
IFM89_001020	K16040 trans-resveratrol di-O-methyltransferase [EC:2.1.1.240] | (RefSeq) trans-resveratrol di-O-methyltransferase (A)
IFM89_025180	K19996 phosphatidylinositol transfer protein SFH5 | (RefSeq) patellin-3 (A)
IFM89_003512	K13418 somatic embryogenesis receptor kinase 1 [EC:2.7.10.1 2.7.11.1] | (RefSeq) LRR receptor kinase SERK2-like (A)
IFM89_030162	K16240 protein suppressor of PHYA-105 1 | (RefSeq) protein SPA1-RELATED 4-like (A)
novel.6905	K08853 AP2-associated kinase [EC:2.7.11.1] | (RefSeq) protein FAR1-RELATED SEQUENCE 5 (A)
IFM89_014080	K04733 interleukin-1 receptor-associated kinase 4 [EC:2.7.11.1] | (RefSeq) G-type lectin S-receptor-like serine/threonine-protein kinase RKS1 isoform X1 (A)
IFM89_021643	K04733 interleukin-1 receptor-associated kinase 4 [EC:2.7.11.1] | (RefSeq) proline-rich receptor-like protein kinase PERK12 (A)
IFM89_005318	K22991 WD repeat-containing protein 45 | (RefSeq) autophagy-related protein 18c-like (A)
IFM89_017151	K18810 cyclin D1/2/4, plant | (RefSeq) cyclin-D1-1-like (A)
IFM89_025586	K10775 phenylalanine ammonia-lyase [EC:4.3.1.24] | (RefSeq) phenylalanine ammonia-lyase (A)
IFM89_037989	K13412 calcium-dependent protein kinase [EC:2.7.11.1] | (RefSeq) calcium-dependent protein kinase 10-like (A)
novel.6947	K05016 chloride channel 7 | (RefSeq) chloride channel protein CLC-c-like (A)
IFM89_007702	K15601 [histone H3]-dimethyl-L-lysine9 demethylase [EC:1.14.11.65] | (RefSeq) lysine-specific demethylase JMJ25-like isoform X1 (A)
IFM89_015456	K15398 fatty acid omega-hydroxylase [EC:1.14.-.-] | (RefSeq) cytochrome P450 86A8-like (A)
IFM89_026039	K13412 calcium-dependent protein kinase [EC:2.7.11.1] | (RefSeq) calcium-dependent protein kinase 2-like (A)
IFM89_003849	K02183 calmodulin | (RefSeq) calmodulin-2/4-like (A)
IFM89_038132	K14403 cleavage and polyadenylation specificity factor subunit 3 [EC:3.1.27.-] | (RefSeq) cleavage and polyadenylation specificity factor subunit 3-I (A)
novel.8583	K08917 light-harvesting complex II chlorophyll a/b binding protein 6 | (RefSeq) chlorophyll a-b binding protein CP24, chloroplastic-like (A)
IFM89_017062	K20043 clathrin coat assembly protein AP180 | (RefSeq) putative clathrin assembly protein At5g35200 (A)
IFM89_035290	K03260 translation initiation factor 4G | (RefSeq) eukaryotic translation initiation factor (A)
IFM89_028313	K00275 pyridoxamine 5'-phosphate oxidase [EC:1.4.3.5] | (Kazusa) Lj3g3v2477630.1; - (A)
IFM89_007725	K23618 acyl-activating enzyme 11/12 [EC:6.2.1.2 6.2.1.-] | (RefSeq) butyrate--CoA ligase AAE11, peroxisomal (A)
IFM89_019072	K06268 serine/threonine-protein phosphatase 2B regulatory subunit | (RefSeq) calcineurin B-like protein 7 (A)
IFM89_019304	K03164 DNA topoisomerase II [EC:5.6.2.2] | (RefSeq) DNA topoisomerase 2 (A)
IFM89_015265	K13680 beta-mannan synthase [EC:2.4.1.32] | (RefSeq) glucomannan 4-beta-mannosyltransferase 9 (A)
IFM89_016291	K00789 S-adenosylmethionine synthetase [EC:2.5.1.6] | (RefSeq) S-adenosylmethionine synthase 1 (A)
IFM89_021324	K13425 WRKY transcription factor 22 | (RefSeq) WRKY transcription factor 22 (A)
IFM89_037169	K00876 uridine kinase [EC:2.7.1.48] | (RefSeq) uridine kinase-like protein 1, chloroplastic (A)
IFM89_025593	K00856 adenosine kinase [EC:2.7.1.20] | (RefSeq) adenosine kinase 2 (A)
IFM89_001612	K18857 alcohol dehydrogenase class-P [EC:1.1.1.1] | (RefSeq) alcohol dehydrogenase 1 (A)
IFM89_032139	K14552 NET1-associated nuclear protein 1 (U3 small nucleolar RNA-associated protein 17) | (RefSeq) WD repeat-containing protein 75-like (A)
IFM89_029944	K05359 arogenate/prephenate dehydratase [EC:4.2.1.91 4.2.1.51] | (RefSeq) arogenate dehydratase/prephenate dehydratase 6, chloroplastic-like (A)
IFM89_029442	K05605 3-hydroxyisobutyryl-CoA hydrolase [EC:3.1.2.4] | (RefSeq) 3-hydroxyisobutyryl-CoA hydrolase-like protein 1, mitochondrial (A)
IFM89_009885	K14945 protein quaking | (RefSeq) KH domain-containing protein At1g09660/At1g09670-like (A)
IFM89_033205	K13800 UMP-CMP kinase [EC:2.7.4.14] | (RefSeq) UMP-CMP kinase 3-like isoform X1 (A)
IFM89_001759	K19041 E3 ubiquitin-protein ligase RNF38/44 [EC:2.3.2.27] | (RefSeq) RING-H2 finger protein ATL43 (A)
IFM89_009415	K06617 raffinose synthase [EC:2.4.1.82] | (RefSeq) probable galactinol--sucrose galactosyltransferase 1 (A)
IFM89_014811	K17613 calcineurin-binding protein cabin-1 | (RefSeq) hypothetical protein (A)
IFM89_035312	K03686 molecular chaperone DnaJ | (RefSeq) uncharacterized protein LOC104820337 (A)
IFM89_021944	K18417 ERI1 exoribonuclease 2 [EC:3.1.-.-] | (RefSeq) uncharacterized LOC104590494 (A)
IFM89_031850	K12501 homogentisate solanesyltransferase [EC:2.5.1.117] | (RefSeq) hypothetical protein (A)
IFM89_004892	K13436 pto-interacting protein 1 [EC:2.7.11.1] | (RefSeq) pto-interacting protein 1-like (A)
IFM89_025158	K01626 3-deoxy-7-phosphoheptulonate synthase [EC:2.5.1.54] | (RefSeq) phospho-2-dehydro-3-deoxyheptonate aldolase 2, chloroplastic-like (A)
IFM89_021542	K13128 zinc finger CCHC domain-containing protein 8 | (RefSeq) hypothetical protein (A)
IFM89_036761	K21383 anthocyanidin 3-O-glucoside 6''-O-acyltransferase [EC:2.3.1.215] | (RefSeq) anthocyanidin 3-O-glucoside 6''-O-acyltransferase-like (A)
IFM89_011656	K21926 (+)-alpha-terpineol/(4S)-limonene synthase [EC:4.2.3.112 4.2.3.16] | (RefSeq) monoterpene synthase-like isoform X1 (A)
IFM89_033035	K13384 (RS)-1-benzyl-1,2,3,4-tetrahydroisoquinoline N-methyltransferase [EC:2.1.1.115 2.1.1.140] | (RefSeq) (S)-coclaurine N-methyltransferase (A)
IFM89_013341	K14500 BR-signaling kinase [EC:2.7.11.1] | (RefSeq) probable serine/threonine-protein kinase At5g41260 (A)
novel.8308	K14493 gibberellin receptor GID1 [EC:3.-.-.-] | (RefSeq) GID1b-1; hypothetical protein (A)
IFM89_019048	K20891 beta-glucuronosyltransferase [EC:2.4.1.-] | (RefSeq) beta-glucuronosyltransferase GlcAT14B-like (A)
IFM89_031657	K20715 phototropin [EC:2.7.11.1] | (RefSeq) phototropin-1 (A)
IFM89_002379	K20495 long-chain fatty acid omega-monooxygenase [EC:1.14.14.80] | (RefSeq) cytochrome P450 704B1-like (A)
IFM89_005637	K14837 nucleolar protein 12 | (RefSeq) RNA-binding protein 34 (A)
IFM89_035333	K13348 protein Mpv17 | (RefSeq) mpv17-like protein isoform X1 (A)
IFM89_022579	K15333 tRNA guanosine-2'-O-methyltransferase [EC:2.1.1.34] | (RefSeq) uncharacterized protein LOC104224633 (A)
IFM89_004060	K13457 disease resistance protein RPM1 | (RefSeq) disease resistance protein RPM1-like (A)
IFM89_034253	K13993 HSP20 family protein | (RefSeq) small heat shock protein, chloroplastic (A)
IFM89_024427	K00264 glutamate synthase (NADH) [EC:1.4.1.14] | (RefSeq) glutamate synthase 1 [NADH], chloroplastic (A)
IFM89_003393	K00963 UTP--glucose-1-phosphate uridylyltransferase [EC:2.7.7.9] | (RefSeq) UTP--glucose-1-phosphate uridylyltransferase (A)
IFM89_017316	K12818 ATP-dependent RNA helicase DHX8/PRP22 [EC:3.6.4.13] | (RefSeq) hypothetical protein (A)
IFM89_012820	K13412 calcium-dependent protein kinase [EC:2.7.11.1] | (RefSeq) calcium-dependent protein kinase 2-like (A)
IFM89_004837	K03327 multidrug resistance protein, MATE family | (RefSeq) protein DETOXIFICATION 34-like (A)
IFM89_019587	K00281 glycine dehydrogenase [EC:1.4.4.2] | (RefSeq) glycine dehydrogenase (decarboxylating), mitochondrial (A)
IFM89_039117	K18368 caffeoylshikimate esterase [EC:3.1.1.-] | (RefSeq) caffeoylshikimate esterase (A)
IFM89_033387	K24028 salicylic acid 3-hydroxylase [EC:1.14.11.-] | (RefSeq) protein DMR6-LIKE OXYGENASE 1-like (A)
IFM89_035475	K04424 sterile alpha motif and leucine zipper containing kinase AZK [EC:2.7.11.25] | (RefSeq) probable serine/threonine-protein kinase SIS8 (A)
IFM89_028666	K15382 solute carrier family 50 (sugar transporter) | (RefSeq) bidirectional sugar transporter SWEET2 (A)
IFM89_011075	K17267 coatomer subunit gamma | (RefSeq) coatomer subunit gamma-2 (A)
IFM89_009579	K17911 beta-carotene isomerase [EC:5.2.1.14] | (RefSeq) beta-carotene isomerase D27, chloroplastic-like isoform X1 (A)
IFM89_023463	K03549 KUP system potassium uptake protein | (RefSeq) potassium transporter 1-like isoform X1 (A)
IFM89_030879	K20098 DNA excision repair protein ERCC-6-like 2 [EC:5.6.2.-] | (GenBank) DNA repair and recombination RAD26-like protein, putative (A)
IFM89_002338	K18881 D-lactate dehydratase [EC:4.2.1.130] | (RefSeq) DJ-1 protein homolog E-like (A)
IFM89_030221	K01803 triosephosphate isomerase (TIM) [EC:5.3.1.1] | (RefSeq) triosephosphate isomerase, cytosolic-like (A)
IFM89_017321	K10999 cellulose synthase A [EC:2.4.1.12] | (RefSeq) cellulose synthase A catalytic subunit 3 [UDP-forming]-like isoform X1 (A)
IFM89_003041	K02183 calmodulin | (RefSeq) calmodulin (A)
IFM89_007728	K15363 fanconi-associated nuclease 1 [EC:3.1.21.- 3.1.4.1] | (RefSeq) fanconi-associated nuclease 1 homolog (A)
IFM89_019471	K04460 serine/threonine-protein phosphatase 5 [EC:3.1.3.16] | (RefSeq) serine/threonine-protein phosphatase 5-like (A)
IFM89_029645	K04506 E3 ubiquitin-protein ligase SIAH1 [EC:2.3.2.27] | (RefSeq) E3 ubiquitin-protein ligase SINAT5 (A)
IFM89_029134	K01110 phosphatidylinositol-3,4,5-trisphosphate 3-phosphatase and dual-specificity protein phosphatase PTEN [EC:3.1.3.16 3.1.3.48 3.1.3.67] | (RefSeq) phosphatidylinositol 3,4,5-trisphosphate 3-phosphatase and protein-tyrosine-phosphatase PTEN2A-like (A)
IFM89_032749	K15333 tRNA guanosine-2'-O-methyltransferase [EC:2.1.1.34] | (RefSeq) uncharacterized protein LOC104224633 (A)
IFM89_019520	K20240 spermidine dicoumaroyl transferase [EC:2.3.1.249] | (RefSeq) spermidine coumaroyl-CoA acyltransferase-like (A)
IFM89_035969	K05681 ATP-binding cassette, subfamily G (WHITE), member 2 | (RefSeq) ABC transporter G family member 5-like (A)
IFM89_004265	K09489 heat shock 70kDa protein 4 | (RefSeq) heat shock 70 kDa protein 15-like (A)
IFM89_012511	K01363 cathepsin B [EC:3.4.22.1] | (RefSeq) cathepsin B-like protease 3 (A)
IFM89_005983	K12616 enhancer of mRNA-decapping protein 4 | (RefSeq) enhancer of mRNA-decapping protein 4 (A)
IFM89_004157	K14638 solute carrier family 15 (peptide/histidine transporter), member 3/4 | (RefSeq) protein NRT1/ PTR FAMILY 8.1-like (A)
IFM89_038038	K00703 starch synthase [EC:2.4.1.21] | (RefSeq) probable starch synthase 4, chloroplastic/amyloplastic (A)
IFM89_034893	K09571 FK506-binding protein 4/5 [EC:5.2.1.8] | (RefSeq) peptidyl-prolyl cis-trans isomerase FKBP62-like (A)
IFM89_019562	K00434 L-ascorbate peroxidase [EC:1.11.1.11] | (RefSeq) L-ascorbate peroxidase, cytosolic (A)
IFM89_030978	K00016 L-lactate dehydrogenase [EC:1.1.1.27] | (RefSeq) L-lactate dehydrogenase B (A)
IFM89_005337	K13430 serine/threonine-protein kinase PBS1 [EC:2.7.11.1] | (RefSeq) serine/threonine-protein kinase PBS1 (A)
IFM89_002696	K18577 mannosylglycoprotein endo-beta-mannosidase [EC:3.2.1.152] | (RefSeq) mannosylglycoprotein endo-beta-mannosidase (A)
IFM89_018363	K03434 N-acetylglucosaminylphosphatidylinositol deacetylase [EC:3.5.1.89] | (RefSeq) N-acetylglucosaminyl-phosphatidylinositol de-N-acetylase (A)
IFM89_012574	K13963 serpin B | (RefSeq) serpin-ZX-like (A)
IFM89_032679	K17605 serine/threonine-protein phosphatase 2A activator | (RefSeq) serine/threonine-protein phosphatase 2A activator 2-like isoform X1 (A)
IFM89_022545	K09285 AP2-like factor, ANT lineage | (RefSeq) AP2-like ethylene-responsive transcription factor ANT (A)
IFM89_034182	K20855 beta-1,3-galactosyltransferase 1/2/3/4/5/7/8 [EC:2.4.1.-] | (RefSeq) probable beta-1,3-galactosyltransferase 4 isoform X1 (A)
IFM89_034534	K01074 palmitoyl-protein thioesterase [EC:3.1.2.22] | (RefSeq) palmitoyl-protein thioesterase 1 (A)
IFM89_012748	K09873 aquaporin TIP | (RefSeq) aquaporin TIP1-1-like (A)
IFM89_003481	K01859 chalcone isomerase [EC:5.5.1.6] | (RefSeq) probable chalcone--flavonone isomerase 3 (A)
IFM89_005691	K12126 phytochrome-interacting factor 3 | (RefSeq) transcription factor PIF3 (A)
IFM89_004241	K08711 ATP-binding cassette, subfamily G (WHITE), member 2, PDR | (RefSeq) ZEB2-regulated ABC transporter 1-like (A)
IFM89_005947	K01081 5'-nucleotidase [EC:3.1.3.5] | (RefSeq) 5' nucleotidase family protein (A)
IFM89_012021	K00128 aldehyde dehydrogenase (NAD+) [EC:1.2.1.3] | (RefSeq) aldehyde dehydrogenase family 2 member B7, mitochondrial (A)
IFM89_029510	K01900 succinyl-CoA synthetase beta subunit [EC:6.2.1.4 6.2.1.5] | (RefSeq) succinate--CoA ligase [ADP-forming] subunit beta, mitochondrial (A)
IFM89_035666	K15216 RNA polymerase I-specific transcription initiation factor RRN3 | (RefSeq) RNA polymerase I-specific transcription initiation factor RRN3-like (A)
IFM89_026366	K20547 basic endochitinase B [EC:3.2.1.14] | (RefSeq) endochitinase CH25 (A)
IFM89_007505	K03404 magnesium chelatase subunit D [EC:6.6.1.1] | (RefSeq) magnesium-chelatase subunit ChlD, chloroplastic (A)
novel.8111	K09338 homeobox-leucine zipper protein | (RefSeq) homeobox-leucine zipper protein HAT22-like (A)
IFM89_030656	K14843 pescadillo | (RefSeq) pescadillo homolog (A)
IFM89_030236	K16055 trehalose 6-phosphate synthase/phosphatase [EC:2.4.1.15 3.1.3.12] | (RefSeq) probable alpha,alpha-trehalose-phosphate synthase [UDP-forming] 9 (A)
IFM89_022614	K15403 fatty acid omega-hydroxy dehydrogenase [EC:1.1.-.-] | (RefSeq) protein HOTHEAD-like isoform X1 (A)
novel.8410	K12882 nuclear cap-binding protein subunit 1 | (RefSeq) nuclear cap-binding protein subunit 1-like (A)
IFM89_007703	K15601 [histone H3]-dimethyl-L-lysine9 demethylase [EC:1.14.11.65] | (RefSeq) lysine-specific demethylase JMJ25-like (A)
IFM89_030522	K14486 auxin response factor | (RefSeq) auxin response factor 5-like isoform X1 (A)
novel.383	K06041 arabinose-5-phosphate isomerase [EC:5.3.1.13] | (RefSeq) probable arabinose 5-phosphate isomerase (A)
IFM89_026598	K04077 chaperonin GroEL | (RefSeq) Chaperonine 60 (A)
IFM89_017726	K00430 peroxidase [EC:1.11.1.7] | (RefSeq) peroxidase A2-like (A)
IFM89_028777	K01187 alpha-glucosidase [EC:3.2.1.20] | (RefSeq) alpha-glucosidase (A)
IFM89_029506	K24195 xenotropic and polytropic retrovirus receptor 1 | (RefSeq) phosphate transporter PHO1-like (A)
IFM89_014413	K12835 ATP-dependent RNA helicase DDX42 [EC:3.6.4.13] | (RefSeq) DEAD-box ATP-dependent RNA helicase 24 isoform X1 (A)
IFM89_018592	K01404 leishmanolysin [EC:3.4.24.36] | (RefSeq) leishmanolysin homolog (A)
novel.8287	K00001 alcohol dehydrogenase [EC:1.1.1.1] | (RefSeq) alcohol dehydrogenase-like 6 (A)
IFM89_011833	K20102 YTH domain-containing family protein | (RefSeq) LOW QUALITY PROTEIN: YTH domain-containing protein ECT4-like (A)
IFM89_001725	K15449 tRNA wybutosine-synthesizing protein 1 [EC:4.1.3.44] | (RefSeq) probable methyltransferase PMT28 (A)
novel.3123	K07904 Ras-related protein Rab-11A | (RefSeq) ras-related protein Rab11D (A)
IFM89_037098	K13066 caffeic acid 3-O-methyltransferase / acetylserotonin O-methyltransferase [EC:2.1.1.68 2.1.1.4] | (RefSeq) caffeic acid 3-O-methyltransferase 1-like (A)
IFM89_036511	K20890 xylan alpha-glucuronosyltransferase [EC:2.4.1.-] | (RefSeq) putative UDP-glucuronate:xylan alpha-glucuronosyltransferase 4 (A)
IFM89_003673	K20718 LRR receptor-like serine/threonine-protein kinase ERECTA [EC:2.7.11.1] | (RefSeq) LRR receptor-like serine/threonine-protein kinase ERECTA (A)
IFM89_023121	K23157 3-O-acetyl-4'-O-demethylpapaveroxine 4'-O-methyltransferase subunit OMT2 [EC:2.1.1.352] | (RefSeq) (RS)-norcoclaurine 6-O-methyltransferase-like (A)
IFM89_034301	K01476 arginase [EC:3.5.3.1] | (RefSeq) arginase 1, mitochondrial isoform X2 (A)
IFM89_004300	K01805 xylose isomerase [EC:5.3.1.5] | (RefSeq) xylose isomerase-like (A)
IFM89_025032	K01969 3-methylcrotonyl-CoA carboxylase beta subunit [EC:6.4.1.4] | (RefSeq) methylcrotonoyl-CoA carboxylase beta chain, mitochondrial (A)
IFM89_018113	K07297 adiponectin receptor | (RefSeq) heptahelical transmembrane protein 3 (A)
IFM89_024986	K04424 sterile alpha motif and leucine zipper containing kinase AZK [EC:2.7.11.25] | (RefSeq) serine/threonine-protein kinase EDR1-like (A)
IFM89_039733	K13415 protein brassinosteroid insensitive 1 [EC:2.7.10.1 2.7.11.1] | (RefSeq) brassinosteroid LRR receptor kinase BRI1-like (A)
IFM89_006153	K08272 calcium binding protein 39 | (RefSeq) putative MO25-like protein At5g47540 (A)
IFM89_025225	K02921 large subunit ribosomal protein L37Ae | (RefSeq) 60S ribosomal protein L37a-1-like (A)
IFM89_036267	K20718 LRR receptor-like serine/threonine-protein kinase ERECTA [EC:2.7.11.1] | (RefSeq) hypothetical protein (A)
IFM89_007707	K01099 inositol polyphosphate 5-phosphatase INPP5B/F [EC:3.1.3.36] | (RefSeq) type II inositol polyphosphate 5-phosphatase 15-like (A)
novel.5879	K15255 ATP-dependent DNA helicase PIF1 [EC:5.6.2.3] | (RefSeq) ATP-dependent DNA helicase PIF1-like (A)
IFM89_018119	K14487 auxin responsive GH3 gene family | (RefSeq) putative indole-3-acetic acid-amido synthetase GH3.9 (A)
IFM89_033851	K12823 ATP-dependent RNA helicase DDX5/DBP2 [EC:3.6.4.13] | (RefSeq) ATP-dependent RNA helicase-like protein DB10 (A)
IFM89_000781	K22374 3''-deamino-3''-oxonicotianamine reductase [EC:1.1.1.285] | (RefSeq) non-functional NADPH-dependent codeinone reductase 2-like isoform X1 (A)
IFM89_002009	K06215 pyridoxal 5'-phosphate synthase pdxS subunit [EC:4.3.3.6] | (RefSeq) pyridoxal 5'-phosphate synthase subunit PDX1.3-like (A)
IFM89_023735	K08287 dual-specificity kinase [EC:2.7.12.1] | (RefSeq) serine/threonine-protein kinase AFC2 isoform X1 (A)
IFM89_033572	K18482 4-amino-4-deoxychorismate lyase [EC:4.1.3.38] | (RefSeq) D-amino-acid transaminase, chloroplastic-like isoform X1 (A)
novel.7006	K03843 alpha-1,3/alpha-1,6-mannosyltransferase [EC:2.4.1.132 2.4.1.257] | (RefSeq) alpha-1,3/1,6-mannosyltransferase ALG2 (A)
IFM89_017480	K01514 exopolyphosphatase [EC:3.6.1.11] | (RefSeq) hypothetical protein (A)
IFM89_028665	K03453 bile acid:Na+ symporter, BASS family | (RefSeq) probable sodium/metabolite cotransporter BASS1, chloroplastic (A)
IFM89_035229	K15304 Ran-binding protein 3 | (RefSeq) nuclear pore complex protein NUP50A-like isoform X1 (A)
IFM89_018410	K22647 ubiquitin carboxyl-terminal hydrolase MINDY-3/4 [EC:3.4.19.12] | (RefSeq) ubiquitin carboxyl-terminal hydrolase MINDY-3-like (A)
IFM89_022526	K20887 xyloglucan glycosyltransferase 4 [EC:2.4.1.-] | (RefSeq) xyloglucan glycosyltransferase 4 (A)
IFM89_028875	K09487 heat shock protein 90kDa beta | (RefSeq) endoplasmin homolog isoform X1 (A)
IFM89_017497	K23553 post-GPI attachment to proteins factor 3 | (RefSeq) uncharacterized protein LOC103633950 (A)
IFM89_034163	K11498 centromeric protein E | (RefSeq) kinesin-like protein KIN-7E (A)
novel.8621	K12891 serine/arginine-rich splicing factor 2/8 | (RefSeq) serine/arginine-rich splicing factor SC35-like isoform X1 (A)
novel.4758	K01534 Zn2+/Cd2+-exporting ATPase [EC:7.2.2.12 7.2.2.21] | (RefSeq) probable cadmium/zinc-transporting ATPase HMA1, chloroplastic (A)
IFM89_025054	K24028 salicylic acid 3-hydroxylase [EC:1.14.11.-] | (Kazusa) Lj0g3v0213339.1; - (A)
IFM89_035986	K03696 ATP-dependent Clp protease ATP-binding subunit ClpC | (RefSeq) ATP-dependent Clp protease ATP-binding subunit ClpA homolog CD4B, chloroplastic-like (A)
IFM89_035515	K05909 laccase [EC:1.10.3.2] | (RefSeq) laccase-4-like (A)
IFM89_037931	K00430 peroxidase [EC:1.11.1.7] | (RefSeq) cationic peroxidase 2-like (A)
IFM89_018202	K10523 speckle-type POZ protein | (RefSeq) uncharacterized protein LOC121811025 (A)
IFM89_010212	K00558 DNA (cytosine-5)-methyltransferase 1 [EC:2.1.1.37] | (RefSeq) DNA (cytosine-5)-methyltransferase CMT3-like (A)
IFM89_031948	K22484 transcriptional regulator CBF1 | (RefSeq) transcription factor bHLH106 (A)
IFM89_037480	K11650 SWI/SNF-related matrix-associated actin-dependent regulator of chromatin subfamily D | (RefSeq) SWI/SNF complex component SNF12 homolog (A)
IFM89_028156	K13418 somatic embryogenesis receptor kinase 1 [EC:2.7.10.1 2.7.11.1] | (RefSeq) somatic embryogenesis receptor kinase 1 (A)
IFM89_017070	K13691 pathogen-inducible salicylic acid glucosyltransferase [EC:2.4.1.-] | (RefSeq) mogroside IE synthase-like (A)
IFM89_011582	K11858 ubiquitin carboxyl-terminal hydrolase 48 [EC:3.4.19.12] | (RefSeq) ubiquitin carboxyl-terminal hydrolase 26 (A)
IFM89_012447	K11254 histone H4 | (RefSeq) histone H4 (A)
IFM89_011015	K14018 phospholipase A-2-activating protein | (RefSeq) phospholipase A-2-activating protein-like (A)
IFM89_004788	K23947 2-oxoglutarate-dependent dioxygenase [EC:1.14.11.-] | (RefSeq) 2-oxoglutarate-dependent dioxygenase DAO-like (A)
IFM89_009825	K10534 nitrate reductase (NAD(P)H) [EC:1.7.1.1 1.7.1.2 1.7.1.3] | (RefSeq) nitrate reductase [NADH]-like (A)
novel.5164	K00423 L-ascorbate oxidase [EC:1.10.3.3] | (RefSeq) L-ascorbate oxidase homolog (A)
IFM89_020205	K00854 xylulokinase [EC:2.7.1.17] | (RefSeq) xylulose kinase-like (A)
IFM89_033850	K00902 dolichol kinase [EC:2.7.1.108] | (RefSeq) dolichol kinase EVAN-like (A)
novel.1660	K15535 phosphoglucan, water dikinase [EC:2.7.9.5] | (RefSeq) phosphoglucan, water dikinase, chloroplastic (A)
IFM89_036794	K14840 nucleolar protein 53 | (RefSeq) ribosome biogenesis protein NOP53 (A)
IFM89_012474	K00924 kinase [EC:2.7.1.-] | (RefSeq) receptor-like protein kinase HSL1 (A)
IFM89_023655	K20769 fatty acid omega-hydroxylase [EC:1.14.-.-] | (RefSeq) cytochrome P450 94A2 (A)
IFM89_011562	K03781 catalase [EC:1.11.1.6] | (RefSeq) catalase isozyme 1 (A)
IFM89_009651	K07407 alpha-galactosidase [EC:3.2.1.22] | (RefSeq) alpha-galactosidase 3 (A)
IFM89_002660	K07025 putative hydrolase of the HAD superfamily | (RefSeq) uncharacterized protein LOC117913851 (A)
IFM89_039080	K00166 2-oxoisovalerate dehydrogenase E1 component alpha subunit [EC:1.2.4.4] | (RefSeq) 2-oxoisovalerate dehydrogenase subunit alpha 2, mitochondrial-like (A)
IFM89_002765	K16297 serine carboxypeptidase-like clade II [EC:3.4.16.-] | (RefSeq) serine carboxypeptidase-like 46 (A)
IFM89_019959	K14780 ATP-dependent RNA helicase DHX37/DHR1 [EC:3.6.4.13] | (RefSeq) ATP-dependent RNA helicase DEAH13-like isoform X1 (A)
IFM89_012872	K01968 3-methylcrotonyl-CoA carboxylase alpha subunit [EC:6.4.1.4] | (RefSeq) LOW QUALITY PROTEIN: methylcrotonoyl-CoA carboxylase subunit alpha, mitochondrial-like (A)
IFM89_018204	K13430 serine/threonine-protein kinase PBS1 [EC:2.7.11.1] | (RefSeq) serine/threonine-protein kinase PBS1-like (A)
novel.4504	K00924 kinase [EC:2.7.1.-] | (RefSeq) shaggy-related protein kinase epsilon-like isoform X1 (A)
IFM89_003063	K03097 casein kinase II subunit alpha [EC:2.7.11.1] | (RefSeq) casein kinase II subunit alpha isoform X1 (A)
IFM89_009098	K10638 E3 ubiquitin-protein ligase UHRF1 [EC:2.3.2.27] | (RefSeq) E3 ubiquitin-protein ligase ORTHRUS 2-like (A)
IFM89_038891	K21630 GATA-type zinc finger protein 1 | (RefSeq) GATA transcription factor 6-like (A)
IFM89_034550	K01535 H+-transporting ATPase [EC:7.1.2.1] | (RefSeq) plasma membrane ATPase 1 (A)
IFM89_008774	K03885 NADH:quinone reductase (non-electrogenic) [EC:1.6.5.9] | (RefSeq) external alternative NAD(P)H-ubiquinone oxidoreductase B2, mitochondrial-like isoform X1 (A)
IFM89_028517	K13464 jasmonate ZIM domain-containing protein | (RefSeq) protein TIFY 10B (A)
IFM89_034856	K09571 FK506-binding protein 4/5 [EC:5.2.1.8] | (RefSeq) peptidyl-prolyl cis-trans isomerase FKBP62 (A)
novel.4723	K11593 eukaryotic translation initiation factor 2C | (RefSeq) protein argonaute 4-like (A)
IFM89_010509	K23947 2-oxoglutarate-dependent dioxygenase [EC:1.14.11.-] | (Kazusa) Lj0g3v0149959.1; - (A)
IFM89_035910	K10999 cellulose synthase A [EC:2.4.1.12] | (RefSeq) cellulose synthase A catalytic subunit 7 [UDP-forming] (A)
IFM89_006330	K01191 alpha-mannosidase [EC:3.2.1.24] | (RefSeq) alpha-mannosidase At3g26720-like (A)
IFM89_007697	K11982 E3 ubiquitin-protein ligase RNF115/126 [EC:2.3.2.27] | (RefSeq) E3 ubiquitin-protein ligase RING1-like (A)
IFM89_013281	K22374 3''-deamino-3''-oxonicotianamine reductase [EC:1.1.1.285] | (RefSeq) non-functional NADPH-dependent codeinone reductase 2-like (A)
IFM89_018685	K08235 xyloglucan:xyloglucosyl transferase [EC:2.4.1.207] | (RefSeq) probable xyloglucan endotransglucosylase/hydrolase protein 23 (A)
IFM89_007465	K02575 MFS transporter, NNP family, nitrate/nitrite transporter | (RefSeq) high affinity nitrate transporter 2.4-like (A)
IFM89_030901	K10695 E3 ubiquitin-protein ligase RNF1/2 [EC:2.3.2.27] | (RefSeq) putative E3 ubiquitin-protein ligase RING1a (A)
IFM89_010977	K13513 lysocardiolipin and lysophospholipid acyltransferase [EC:2.3.1.- 2.3.1.51] | (RefSeq) probable 1-acyl-sn-glycerol-3-phosphate acyltransferase 5 (A)
IFM89_018561	K21437 ankyrin repeat domain-containing protein 13 | (RefSeq) ankyrin repeat domain-containing protein 13C (A)
IFM89_004283	K00875 D-ribulokinase [EC:2.7.1.47] | (RefSeq) D-ribulokinase, ribitol kinase (A)
IFM89_029829	K21737 acyl-lipid Delta6-acetylenase / acyl-lipid (9-3)-desaturase [EC:1.14.19.38 1.14.19.47] | (RefSeq) delta(8)-fatty-acid desaturase-like (A)
IFM89_027405	K19564 choline transport protein | (RefSeq) choline transport protein-like (A)
IFM89_002928	K12198 charged multivesicular body protein 5 | (RefSeq) vacuolar protein sorting-associated protein 60.1-like (A)
novel.1345	K17604 zinc finger SWIM domain-containing protein 3 | (RefSeq) protein FAR1-RELATED SEQUENCE 8-like isoform X1 (A)
IFM89_015613	K00521 ferric-chelate reductase [EC:1.16.1.7] | (RefSeq) ferric reduction oxidase 7, chloroplastic-like (A)
IFM89_021347	K17525 chitinase domain-containing protein 1 | (RefSeq) chitinase domain-containing protein 1 (A)
IFM89_033550	K12761 carbon catabolite-derepressing protein kinase [EC:2.7.11.1] | (RefSeq) CBL-interacting serine/threonine-protein kinase 11 (A)
IFM89_028147	K09273 upstream-binding transcription factor | (RefSeq) high mobility group B protein 13-like (A)
IFM89_034405	K01850 chorismate mutase [EC:5.4.99.5] | (RefSeq) chorismate mutase 1, chloroplastic-like (A)
IFM89_037048	K12823 ATP-dependent RNA helicase DDX5/DBP2 [EC:3.6.4.13] | (RefSeq) DEAD-box ATP-dependent RNA helicase 40 isoform X2 (A)
IFM89_014139	K00327 NADPH-ferrihemoprotein reductase [EC:1.6.2.4] | (RefSeq) NADPH--cytochrome P450 reductase-like (A)
IFM89_006647	K22133 oxalate---CoA ligase [EC:6.2.1.8] | (RefSeq) oxalate--CoA ligase-like (A)
IFM89_020252	K09285 AP2-like factor, ANT lineage | (RefSeq) AP2-like ethylene-responsive transcription factor ANT (A)
IFM89_036195	K00588 caffeoyl-CoA O-methyltransferase [EC:2.1.1.104] | (RefSeq) caffeoyl-CoA O-methyltransferase (A)
IFM89_017727	K00430 peroxidase [EC:1.11.1.7] | (RefSeq) peroxidase A2-like (A)
IFM89_038214	K20771 carlactone C-19 oxidase [EC:1.14.-.-] | (RefSeq) cytochrome P450 711A1 (A)
IFM89_016469	K23877 xyloglucan O-acetyltransferase | (RefSeq) protein ALTERED XYLOGLUCAN 4 (A)
IFM89_034775	K08726 soluble epoxide hydrolase / lipid-phosphate phosphatase [EC:3.3.2.10 3.1.3.76] | (RefSeq) uncharacterized protein LOC110941524 (A)
IFM89_015015	K01184 polygalacturonase [EC:3.2.1.15] | (RefSeq) probable polygalacturonase At3g15720 (A)
IFM89_015064	K07766 diphosphoinositol-polyphosphate diphosphatase [EC:3.6.1.52] | (RefSeq) nudix hydrolase 17, mitochondrial (A)
IFM89_028401	K14819 dual specificity phosphatase 12 [EC:3.1.3.16 3.1.3.48] | (RefSeq) dual specificity protein phosphatase 12-like (A)
IFM89_024554	K23260 scopoletin glucosyltransferase [EC:2.4.1.128] | (RefSeq) scopoletin glucosyltransferase-like (A)
IFM89_028953	K14816 pre-60S factor REI1 | (RefSeq) cytoplasmic 60S subunit biogenesis factor REI1 homolog 1 (A)
novel.655	K22262 WD repeat and FYVE domain-containing protein 3 | (RefSeq) protein SPIRRIG-like isoform X1 (A)
IFM89_002103	K19040 E3 ubiquitin-protein ligase ATL10/75/76/77/78 [EC:2.3.2.27] | (RefSeq) RING-H2 finger protein ATL78-like (A)
IFM89_035504	K19747 BAHD acyltransferase [EC:2.3.1.-] | (RefSeq) BAHD acyltransferase DCR-like (A)
IFM89_004583	K13691 pathogen-inducible salicylic acid glucosyltransferase [EC:2.4.1.-] | (RefSeq) UDP-glycosyltransferase 74G1-like (A)
IFM89_004145	K21596 calmodulin-binding transcription activator | (RefSeq) uncharacterized LOC107794376 (A)
IFM89_035004	K02540 DNA replication licensing factor MCM2 [EC:5.6.2.3] | (RefSeq) DNA replication licensing factor MCM2 (A)
IFM89_018184	K12447 UDP-sugar pyrophosphorylase [EC:2.7.7.64] | (RefSeq) UDP-sugar pyrophosphorylase-like (A)
novel.8271	K07407 alpha-galactosidase [EC:3.2.1.22] | (RefSeq) alpha-galactosidase 1 (A)
IFM89_021595	K09422 transcription factor MYB, plant | (RefSeq) transcription factor MYB1-like isoform X1 (A)
IFM89_022042	K13422 transcription factor MYC2 | (RefSeq) transcription factor MYC2-like (A)
IFM89_022769	K03327 multidrug resistance protein, MATE family | (RefSeq) LOW QUALITY PROTEIN: protein DETOXIFICATION 41 (A)
IFM89_038068	K00924 kinase [EC:2.7.1.-] | (RefSeq) receptor protein kinase CLAVATA1 (A)
IFM89_027685	K10808 ribonucleoside-diphosphate reductase subunit M2 [EC:1.17.4.1] | (RefSeq) ribonucleoside-diphosphate reductase small chain (A)
IFM89_008070	K00012 UDPglucose 6-dehydrogenase [EC:1.1.1.22] | (RefSeq) UDP-glucose 6-dehydrogenase 5 (A)
IFM89_012276	K01103 6-phosphofructo-2-kinase / fructose-2,6-biphosphatase 3 [EC:2.7.1.105 3.1.3.46] | (RefSeq) 6-phosphofructo-2-kinase/fructose-2,6-bisphosphatase (A)
IFM89_024760	K01052 lysosomal acid lipase/cholesteryl ester hydrolase [EC:3.1.1.13] | (RefSeq) triacylglycerol lipase 2-like (A)
IFM89_012646	K03327 multidrug resistance protein, MATE family | (RefSeq) protein DETOXIFICATION 27-like isoform X1 (A)
IFM89_034005	K09487 heat shock protein 90kDa beta | (RefSeq) endoplasmin homolog isoform X1 (A)
IFM89_021439	K03794 sirohydrochlorin ferrochelatase [EC:4.99.1.4] | (RefSeq) sirohydrochlorin ferrochelatase, chloroplastic-like isoform X1 (A)
IFM89_008936	K23280 rhamnogalacturonan I rhamnosyltransferase [EC:2.4.1.351] | (RefSeq) uncharacterized protein At1g04910-like (A)
IFM89_018939	K03029 26S proteasome regulatory subunit N10 | (RefSeq) 26S proteasome non-ATPase regulatory subunit 4 homolog (A)
IFM89_006714	K01184 polygalacturonase [EC:3.2.1.15] | (RefSeq) polygalacturonase (A)
IFM89_005973	K00850 6-phosphofructokinase 1 [EC:2.7.1.11] | (RefSeq) ATP-dependent 6-phosphofructokinase 6-like (A)
novel.3586	K17906 autophagy-related protein 2 | (RefSeq) autophagy-related protein 2 (A)
IFM89_005233	K01757 strictosidine synthase [EC:4.3.3.2] | (RefSeq) protein STRICTOSIDINE SYNTHASE-LIKE 12-like (A)
IFM89_008183	K11844 ubiquitin carboxyl-terminal hydrolase 16/45 [EC:3.4.19.12] | (RefSeq) ubiquitin carboxyl-terminal hydrolase 2 (A)
novel.8389	K01069 hydroxyacylglutathione hydrolase [EC:3.1.2.6] | (RefSeq) hydroxyacylglutathione hydrolase 1, mitochondrial-like (A)
IFM89_017008	K23720 UV-stimulated scaffold protein A | (RefSeq) UV-stimulated scaffold protein A homolog (A)
IFM89_023688	K03283 heat shock 70kDa protein 1/2/6/8 | (RefSeq) heat shock cognate 70 kDa protein 2 (A)
IFM89_011467	K23280 rhamnogalacturonan I rhamnosyltransferase [EC:2.4.1.351] | (RefSeq) uncharacterized protein At1g04910 (A)
IFM89_010980	K10666 E3 ubiquitin-protein ligase RNF5 [EC:2.3.2.27] | (RefSeq) E3 ubiquitin-protein ligase RNF185-like (A)
IFM89_016695	K02184 formin 2 | (RefSeq) uncharacterized protein LOC112294431 (A)
IFM89_006164	K10523 speckle-type POZ protein | (RefSeq) BTB/POZ domain-containing protein At1g55760-like (A)
IFM89_038340	K11968 ariadne-1 [EC:2.3.2.31] | (RefSeq) probable E3 ubiquitin-protein ligase ARI7 isoform X1 (A)
IFM89_005219	K12828 splicing factor 3B subunit 1 | (RefSeq) splicing factor 3B subunit 1 (A)
IFM89_024850	K14299 nucleoporin SEH1 | (RefSeq) protein SEH1-like (A)
IFM89_035085	K13111 WD40 repeat-containing protein SMU1 | (RefSeq) suppressor of mec-8 and unc-52 protein homolog 1 (A)
IFM89_014291	K13065 shikimate O-hydroxycinnamoyltransferase [EC:2.3.1.133] | (RefSeq) vinorine synthase-like (A)
IFM89_023244	K08678 UDP-glucuronate decarboxylase [EC:4.1.1.35] | (RefSeq) UDP-glucuronic acid decarboxylase 2-like (A)
IFM89_016425	K00109 2-hydroxyglutarate dehydrogenase [EC:1.1.99.2] | (RefSeq) L-2-hydroxyglutarate dehydrogenase, mitochondrial (A)
IFM89_039384	K03798 cell division protease FtsH [EC:3.4.24.-] | (RefSeq) ATP-dependent zinc metalloprotease FTSH 12, chloroplastic (A)
IFM89_036064	K07025 putative hydrolase of the HAD superfamily | (RefSeq) uncharacterized LOC104601051 (A)
IFM89_022059	K11594 ATP-dependent RNA helicase DDX3X [EC:3.6.4.13] | (RefSeq) DEAD-box ATP-dependent RNA helicase 37-like (A)
IFM89_024527	K14677 aminoacylase [EC:3.5.1.14] | (RefSeq) uncharacterized protein LOC104719897 (A)
IFM89_027332	K00894 ethanolamine kinase [EC:2.7.1.82] | (RefSeq) probable ethanolamine kinase (A)
novel.7993	K09338 homeobox-leucine zipper protein | (RefSeq) homeobox-leucine zipper protein ATHB-14 isoform X1 (A)
IFM89_036711	K14638 solute carrier family 15 (peptide/histidine transporter), member 3/4 | (RefSeq) hypothetical protein (A)
IFM89_021996	K02834 ribosome-binding factor A | (RefSeq) probable ribosome-binding factor A, chloroplastic (A)
IFM89_000197	K08869 aarF domain-containing kinase | (RefSeq) uncharacterized protein LOC122076742 (A)
IFM89_021429	K00128 aldehyde dehydrogenase (NAD+) [EC:1.2.1.3] | (RefSeq) aldehyde dehydrogenase family 3 member H1-like (A)
IFM89_017168	K10781 fatty acyl-ACP thioesterase B [EC:3.1.2.14 3.1.2.21] | (RefSeq) uncharacterized protein LOC113347984 isoform X1 (A)
IFM89_018828	K05391 cyclic nucleotide gated channel, plant | (RefSeq) probable cyclic nucleotide-gated ion channel 5 (A)
IFM89_002430	K20027 palmitoyltransferase ZDHHC1/11 [EC:2.3.1.225] | (RefSeq) protein S-acyltransferase 21 (A)
IFM89_000842	K10773 endonuclease III [EC:4.2.99.18] | (RefSeq) putative DNA glycosylase At3g47830 isoform X1 (A)
IFM89_017087	K14003 prolactin regulatory element-binding protein | (RefSeq) SEC12-like protein 1 (A)
IFM89_034539	K22763 deubiquitinase DESI2 [EC:3.4.19.12] | (Kazusa) Lj2g3v1989220.3; - (A)
IFM89_025955	K06174 ATP-binding cassette, sub-family E, member 1 | (RefSeq) F-box/kelch-repeat protein At3g13680-like isoform X1 (A)
IFM89_019699	K09527 DnaJ homolog subfamily C member 7 | (RefSeq) inactive TPR repeat-containing thioredoxin TTL3-like (A)
IFM89_020279	K02875 large subunit ribosomal protein L14e | (RefSeq) 60S ribosomal protein L14-1 (A)
IFM89_014967	K12309 beta-galactosidase [EC:3.2.1.23] | (RefSeq) beta-galactosidase 2 isoform X1 (A)
IFM89_038472	K22683 aspartyl protease family protein [EC:3.4.23.-] | (RefSeq) aspartyl protease family protein 2 (A)
IFM89_036989	K10257 acyl-lipid omega-3 desaturase [EC:1.14.19.25 1.14.19.35 1.14.19.36] | (RefSeq) omega-3 fatty acid desaturase, chloroplastic-like (A)
IFM89_017893	K00679 phospholipid:diacylglycerol acyltransferase [EC:2.3.1.158] | (RefSeq) hypothetical protein (A)
IFM89_017642	K20721 reticulon-1 | (RefSeq) reticulon-like protein B1 (A)
IFM89_027922	K14792 rRNA biogenesis protein RRP5 | (RefSeq) rRNA biogenesis protein RRP5-like (A)
IFM89_014907	K07375 tubulin beta | (RefSeq) tubulin beta-3 chain-like (A)
IFM89_018420	K09338 homeobox-leucine zipper protein | (RefSeq) homeobox-leucine zipper protein ATHB-13-like (A)
IFM89_005037	K12392 AP-1 complex subunit beta-1 | (RefSeq) beta-adaptin-like protein C (A)
IFM89_029616	K11979 E3 ubiquitin-protein ligase UBR7 [EC:2.3.2.27] | (RefSeq) putative E3 ubiquitin-protein ligase UBR7 (A)
IFM89_019603	K01513 ectonucleotide pyrophosphatase/phosphodiesterase family member 1/3 [EC:3.1.4.1 3.6.1.9] | (RefSeq) ectonucleotide pyrophosphatase/phosphodiesterase family member 3 (A)
IFM89_015857	K03676 glutaredoxin 3 | (RefSeq) putative glutaredoxin-C14 (A)
IFM89_017706	K23050 phenylcoumaran benzylic ether reductase [EC:1.3.1.-] | (RefSeq) IFRL5; isoflavone reductase-like protein 5 (A)
IFM89_026128	K00600 glycine hydroxymethyltransferase [EC:2.1.2.1] | (RefSeq) serine hydroxymethyltransferase 3, chloroplastic-like isoform X1 (A)
IFM89_000482	K11251 histone H2A | (RefSeq) histone H2A (A)
IFM89_000977	K20304 trafficking protein particle complex subunit 6 | (RefSeq) trafficking protein particle complex subunit 6b (A)
IFM89_021913	K01537 P-type Ca2+ transporter type 2C [EC:7.2.2.10] | (RefSeq) calcium-transporting ATPase 2, plasma membrane-type isoform X1 (A)
IFM89_015056	K03237 translation initiation factor 2 subunit 1 | (RefSeq) eukaryotic translation initiation factor 2 subunit alpha homolog (A)
IFM89_025181	K11718 UDP-glucose:glycoprotein glucosyltransferase [EC:2.4.1.-] | (RefSeq) UDP-glucose:glycoprotein glucosyltransferase (A)
IFM89_027588	K13496 UDP-glucosyltransferase 73C [EC:2.4.1.-] | (RefSeq) UDP-glycosyltransferase 73E1 (A)
IFM89_017744	K01280 tripeptidyl-peptidase II [EC:3.4.14.10] | (RefSeq) tripeptidyl-peptidase 2 (A)
IFM89_023956	K12867 pre-mRNA-splicing factor SYF1 | (RefSeq) hypothetical protein (A)
IFM89_025486	K10268 F-box and leucine-rich repeat protein 2/20 | (RefSeq) F-box/LRR-repeat protein 2-like (A)
IFM89_039883	K14440 SWI/SNF-related matrix-associated actin-dependent regulator of chromatin subfamily A-like protein 1 [EC:5.6.2.-] | (RefSeq) SWI/SNF-related matrix-associated actin-dependent regulator of chromatin subfamily A-like protein 1 isoform X1 (A)
IFM89_029765	K18606 hydroxyphenylpyruvate reductase [EC:1.1.1.237] | (RefSeq) hydroxyphenylpyruvate reductase-like (A)
IFM89_028046	K08193 MFS transporter, ACS family, solute carrier family 17 (sodium-dependent inorganic phosphate cotransporter), other | (RefSeq) probable anion transporter 3, chloroplastic (A)
IFM89_031362	K08910 light-harvesting complex I chlorophyll a/b binding protein 4 | (RefSeq) chlorophyll a-b binding protein 4, chloroplastic (A)
IFM89_002216	K08867 WNK lysine deficient protein kinase [EC:2.7.11.1] | (RefSeq) serine/threonine-protein kinase WNK1-like (A)
IFM89_032358	K13382 (S)-norcoclaurine synthase [EC:4.2.1.78] | (RefSeq) uncharacterized protein LOC113340282 (A)
IFM89_028493	no KO assigned | (RefSeq) probable S-adenosyl-L-methionine-dependent RNA methyltransferase RSM22, mitochondrial (A)
IFM89_036388	K14488 SAUR family protein | (RefSeq) uncharacterized protein LOC110273994 (A)
IFM89_032621	K13065 shikimate O-hydroxycinnamoyltransferase [EC:2.3.1.133] | (RefSeq) putrescine hydroxycinnamoyltransferase 1-like (A)
IFM89_008135	K03549 KUP system potassium uptake protein | (RefSeq) probable potassium transporter 17 isoform X1 (A)
novel.5968	K00844 hexokinase [EC:2.7.1.1] | (RefSeq) hexokinase-2-like (A)
IFM89_022394	K21867 potassium channel | (RefSeq) potassium channel AKT1-like (A)
IFM89_030899	K13415 protein brassinosteroid insensitive 1 [EC:2.7.10.1 2.7.11.1] | (RefSeq) uncharacterized protein LOC103413440 isoform X1 (A)
IFM89_003157	K11968 ariadne-1 [EC:2.3.2.31] | (RefSeq) probable E3 ubiquitin-protein ligase ARI2 isoform X1 (A)
IFM89_024081	K02996 small subunit ribosomal protein S9 | (RefSeq) uncharacterized protein LOC110658166 (A)
IFM89_025887	K24772 guanine nucleotide-binding protein subunit gamma 1/2, plant | (RefSeq) guanine nucleotide-binding protein subunit gamma 1-like (A)
IFM89_037084	K21867 potassium channel | (RefSeq) LOW QUALITY PROTEIN: potassium channel AKT2/3-like (A)
IFM89_028473	K07198 5'-AMP-activated protein kinase, catalytic alpha subunit [EC:2.7.11.11] | (RefSeq) CBL-interacting protein kinase 5 (A)
IFM89_038635	K02964 small subunit ribosomal protein S18e | (RefSeq) 40S ribosomal protein S18-like (A)
IFM89_032873	K06910 phosphatidylethanolamine-binding protein | (RefSeq) CEN-like protein 1 (A)
IFM89_006133	K20308 trafficking protein particle complex subunit 11 | (RefSeq) trafficking protein particle complex subunit 11 (A)
IFM89_022087	K10638 E3 ubiquitin-protein ligase UHRF1 [EC:2.3.2.27] | (RefSeq) uncharacterized protein LOC113321800 isoform X1 (A)
IFM89_009935	K16296 serine carboxypeptidase-like clade I [EC:3.4.16.-] | (RefSeq) serine carboxypeptidase-like 1 (A)
IFM89_035777	K03283 heat shock 70kDa protein 1/2/6/8 | (RefSeq) heat shock cognate 70 kDa protein 2-like (A)
IFM89_015292	K16297 serine carboxypeptidase-like clade II [EC:3.4.16.-] | (RefSeq) serine carboxypeptidase-like 33 isoform X1 (A)
IFM89_023538	K20887 xyloglucan glycosyltransferase 4 [EC:2.4.1.-] | (RefSeq) xyloglucan glycosyltransferase 4 (A)
IFM89_022359	K13457 disease resistance protein RPM1 | (RefSeq) uncharacterized protein sll1770 (A)
IFM89_003079	K11434 type I protein arginine methyltransferase [EC:2.1.1.319] | (RefSeq) protein arginine N-methyltransferase PRMT10 (A)
IFM89_013501	K03008 DNA-directed RNA polymerase II subunit RPB11 | (RefSeq) protein VAPYRIN-LIKE isoform X1 (A)
IFM89_001246	K00430 peroxidase [EC:1.11.1.7] | (RefSeq) peroxidase P7-like (A)
novel.6536	K07760 cyclin-dependent kinase [EC:2.7.11.22] | (RefSeq) cell division control protein 2 homolog D-like (A)
IFM89_013226	K13025 ATP-dependent RNA helicase [EC:3.6.4.13] | (RefSeq) eukaryotic initiation factor 4A-3 (A)
IFM89_023849	K00099 1-deoxy-D-xylulose-5-phosphate reductoisomerase [EC:1.1.1.267] | (RefSeq) 1-deoxy-D-xylulose 5-phosphate reductoisomerase, chloroplastic (A)
IFM89_019387	K08835 serine/threonine-protein kinase OSR1/STK39 [EC:2.7.11.1] | (RefSeq) probable LRR receptor-like serine/threonine-protein kinase At1g53430 (A)
IFM89_014433	K14487 auxin responsive GH3 gene family | (RefSeq) indole-3-acetic acid-amido synthetase GH3.6 (A)
IFM89_009544	K10406 kinesin family member C2/C3 | (GenBank) kinesin heavy chain, putative (A)
IFM89_021689	K16365 small glutamine-rich tetratricopeptide repeat-containing protein alpha | (RefSeq) hsp70-Hsp90 organizing protein 3 (A)
novel.3923	K00002 alcohol dehydrogenase (NADP+) [EC:1.1.1.2] | (RefSeq) NADPH-dependent aldo-keto reductase, chloroplastic-like (A)
IFM89_027904	K07512 mitochondrial enoyl-[acyl-carrier protein] reductase / trans-2-enoyl-CoA reductase [EC:1.3.1.- 1.3.1.38] | (RefSeq) probable trans-2-enoyl-CoA reductase, mitochondrial (A)
IFM89_010483	K01183 chitinase [EC:3.2.1.14] | (RefSeq) endochitinase EP3-like (A)
IFM89_011831	K00167 2-oxoisovalerate dehydrogenase E1 component beta subunit [EC:1.2.4.4] | (RefSeq) 2-oxoisovalerate dehydrogenase subunit beta 1, mitochondrial-like (A)
IFM89_012322	K11498 centromeric protein E | (RefSeq) kinesin-like protein KIN-7E, chloroplastic (A)
IFM89_031703	K15227 arogenate dehydrogenase (NADP+), plant [EC:1.3.1.78] | (RefSeq) arogenate dehydrogenase 2, chloroplastic-like (A)
IFM89_017136	K00764 amidophosphoribosyltransferase [EC:2.4.2.14] | (RefSeq) amidophosphoribosyltransferase, chloroplastic (A)
IFM89_034605	K17506 protein phosphatase 1L [EC:3.1.3.16] | (RefSeq) probable protein phosphatase 2C 14 (A)
IFM89_033577	K22376 E3 ubiquitin-protein ligase KCMF1 [EC:2.3.2.27] | (RefSeq) protein DEHYDRATION-INDUCED 19 homolog 4-like (A)
IFM89_015984	K01051 pectinesterase [EC:3.1.1.11] | (RefSeq) pectinesterase-like (A)
IFM89_023082	K02695 photosystem I subunit VI | (RefSeq) photosystem I reaction center subunit VI, chloroplastic-like (A)
IFM89_021832	K14494 DELLA protein | (RefSeq) DELLA protein GAI-like (A)
IFM89_038130	K17906 autophagy-related protein 2 | (RefSeq) autophagy-related protein 2-like (A)
IFM89_030232	K12896 serine/arginine-rich splicing factor 7 | (RefSeq) serine/arginine-rich splicing factor RSZ21A (A)
IFM89_005390	K09338 homeobox-leucine zipper protein | (RefSeq) homeobox-leucine zipper protein ATHB-54-like (A)
IFM89_020960	K15919 glyoxylate/hydroxypyruvate reductase [EC:1.1.1.79 1.1.1.81] | (RefSeq) glyoxylate/hydroxypyruvate reductase HPR3-like (A)
IFM89_034949	K08867 WNK lysine deficient protein kinase [EC:2.7.11.1] | (RefSeq) serine/threonine-protein kinase WNK1-like (A)
IFM89_014909	K07375 tubulin beta | (RefSeq) tubulin beta chain-like (A)
IFM89_022005	K09286 EREBP-like factor | (RefSeq) ethylene-responsive transcription factor RAP2-4-like (A)
IFM89_034447	K10597 ubiquitin conjugation factor E4 B [EC:2.3.2.27] | (RefSeq) probable ubiquitin conjugation factor E4 (A)
IFM89_035319	K08235 xyloglucan:xyloglucosyl transferase [EC:2.4.1.207] | (RefSeq) probable xyloglucan endotransglucosylase/hydrolase protein 6 (A)
IFM89_017332	K17822 DCN1-like protein 1/2 | (RefSeq) DCN1-like protein 2 isoform X3 (A)
IFM89_012661	K15210 snRNA-activating protein complex subunit 3 | (RefSeq) snRNA-activating protein complex subunit (A)
IFM89_009248	K09503 DnaJ homolog subfamily A member 2 | (RefSeq) dnaJ protein homolog (A)
IFM89_012794	K14409 protein SMG7 | (RefSeq) protein SMG7 isoform X1 (A)
IFM89_010524	K10599 pre-mRNA-processing factor 19 [EC:2.3.2.27] | (RefSeq) pre-mRNA-processing factor 19-like (A)
novel.7059	K03030 26S proteasome regulatory subunit N11 | (RefSeq) 26S proteasome non-ATPase regulatory subunit 14 homolog (A)
novel.280	K21777 G2/mitotic-specific cyclin-B, other | (RefSeq) G2/mitotic-specific cyclin-2-like (A)
IFM89_003670	K12812 ATP-dependent RNA helicase UAP56/SUB2 [EC:3.6.4.13] | (RefSeq) DEAD-box ATP-dependent RNA helicase 15 (A)
IFM89_002814	K04733 interleukin-1 receptor-associated kinase 4 [EC:2.7.11.1] | (RefSeq) proline-rich receptor-like protein kinase PERK12 (A)
IFM89_037624	K00430 peroxidase [EC:1.11.1.7] | (RefSeq) cationic peroxidase 1 (A)
IFM89_038128	K16865 programmed cell death protein 4 | (RefSeq) hypothetical protein (A)
IFM89_038297	K07198 5'-AMP-activated protein kinase, catalytic alpha subunit [EC:2.7.11.11] | (RefSeq) SNF1-related protein kinase catalytic subunit alpha KIN10-like (A)
IFM89_027967	K19366 spartin | (RefSeq) protein EARLY-RESPONSIVE TO DEHYDRATION 7, chloroplastic (A)
IFM89_004919	K00847 fructokinase [EC:2.7.1.4] | (RefSeq) probable fructokinase-1 isoform X1 (A)
IFM89_008004	K02210 DNA replication licensing factor MCM7 [EC:5.6.2.3] | (RefSeq) DNA replication licensing factor MCM7 (A)
IFM89_011459	K25075 pterocarpan synthase [EC:4.2.1.139] | (RefSeq) dirigent protein 2-like (A)
IFM89_031301	K22846 S-sulfo-L-cysteine synthase (O-acetyl-L-serine-dependent) [EC:2.5.1.144] | (RefSeq) probable arabinosyltransferase ARAD1 (A)
IFM89_011088	K19001 ATP-dependent DNA helicase | (RefSeq) ATP-dependent DNA helicase DDM1 (A)
IFM89_020999	K09529 DnaJ homolog subfamily C member 9 | (RefSeq) chaperone protein dnaJ 6-like (A)
IFM89_022662	K10590 E3 ubiquitin-protein ligase TRIP12 [EC:2.3.2.26] | (RefSeq) E3 ubiquitin-protein ligase UPL4 isoform X1 (A)
IFM89_021392	K20472 coatomer subunit zeta | (RefSeq) coatomer subunit zeta-1-like (A)
IFM89_037108	K23260 scopoletin glucosyltransferase [EC:2.4.1.128] | (RefSeq) scopoletin glucosyltransferase-like (A)
IFM89_039960	K20617 cytochrome P450 family 71 subfamily A | (RefSeq) cytochrome P450 71A1-like (A)
IFM89_031472	K13508 glycerol-3-phosphate acyltransferase [EC:2.3.1.15 2.3.1.198] | (RefSeq) glycerol-3-phosphate 2-O-acyltransferase 6 (A)
IFM89_009914	K07735 putative transcriptional regulator | (RefSeq) uncharacterized protein LOC108823645 (A)
IFM89_000793	K00966 mannose-1-phosphate guanylyltransferase [EC:2.7.7.13] | (RefSeq) mannose-1-phosphate guanyltransferase alpha (A)
IFM89_035088	K05359 arogenate/prephenate dehydratase [EC:4.2.1.91 4.2.1.51] | (RefSeq) arogenate dehydratase/prephenate dehydratase 6, chloroplastic-like (A)
IFM89_015107	K11684 bromodomain-containing factor 1 | (RefSeq) transcription factor GTE4 (A)
IFM89_003456	K13110 microfibrillar-associated protein 1 | (RefSeq) microfibrillar-associated protein 1A-like (A)
IFM89_008268	K08960 casein kinase 1, epsilon [EC:2.7.11.1] | (RefSeq) casein kinase 1-like protein 3 (A)
IFM89_007168	K09286 EREBP-like factor | (RefSeq) ethylene-responsive transcription factor ERF071 (A)
IFM89_007625	K15102 solute carrier family 25 (mitochondrial phosphate transporter), member 3 | (RefSeq) mitochondrial phosphate carrier protein 3, mitochondrial-like (A)
IFM89_015516	K17756 long-chain-alcohol oxidase [EC:1.1.3.20] | (RefSeq) long-chain-alcohol oxidase FAO4A-like (A)
IFM89_002478	K16297 serine carboxypeptidase-like clade II [EC:3.4.16.-] | (RefSeq) LOW QUALITY PROTEIN: serine carboxypeptidase-like 27 (A)
IFM89_018010	K23872 putative homogalacturonan methyltransferase [EC:2.1.1.-] | (RefSeq) hypothetical protein (A)
novel.635	K03033 26S proteasome regulatory subunit N3 | (RefSeq) probable 26S proteasome non-ATPase regulatory subunit 3 (A)
IFM89_011009	K12626 U6 snRNA-associated Sm-like protein LSm7 | (RefSeq) sm-like protein LSM7 (A)
IFM89_003542	K13422 transcription factor MYC2 | (RefSeq) transcription factor MYC2-like (A)
IFM89_024163	K21867 potassium channel | (RefSeq) potassium channel KAT3 (A)
IFM89_018822	K08852 serine/threonine-protein kinase/endoribonuclease IRE1 [EC:2.7.11.1 3.1.26.-] | (RefSeq) serine/threonine-protein kinase/endoribonuclease IRE1a-like isoform X1 (A)
IFM89_008893	K12761 carbon catabolite-derepressing protein kinase [EC:2.7.11.1] | (RefSeq) CBL-interacting serine/threonine-protein kinase 7-like (A)
novel.7491	K16572 gamma-tubulin complex component 5 | (RefSeq) gamma-tubulin complex component 5-like (A)
IFM89_036204	K11430 [histone H3]-lysine27 N-trimethyltransferase EZH2 [EC:2.1.1.356] | (RefSeq) histone-lysine N-methyltransferase CLF isoform X1 (A)
IFM89_037642	K15449 tRNA wybutosine-synthesizing protein 1 [EC:4.1.3.44] | (RefSeq) probable methyltransferase PMT28 (A)
IFM89_013937	K00279 cytokinin dehydrogenase [EC:1.5.99.12] | (RefSeq) cytokinin dehydrogenase 6 (A)
IFM89_016978	K13382 (S)-norcoclaurine synthase [EC:4.2.1.78] | (RefSeq) uncharacterized protein LOC113340282 (A)
novel.8291	K10727 chromatin licensing and DNA replication factor 1 | (RefSeq) CDT1-like protein a, chloroplastic isoform X1 (A)
IFM89_020854	K01785 aldose 1-epimerase [EC:5.1.3.3] | (RefSeq) aldose 1-epimerase-like (A)
IFM89_009714	K01904 4-coumarate--CoA ligase [EC:6.2.1.12] | (RefSeq) 4-coumarate--CoA ligase-like 7 (A)
IFM89_033509	K20628 expansin | (RefSeq) expansin-A8-like (A)
IFM89_033045	K15400 omega-hydroxypalmitate O-feruloyl transferase [EC:2.3.1.188] | (RefSeq) omega-hydroxypalmitate O-feruloyl transferase (A)
IFM89_007420	K19042 E3 ubiquitin-protein ligase BOI and related proteins [EC:2.3.2.27] | (RefSeq) BOI-related E3 ubiquitin-protein ligase 1 (A)
IFM89_000999	K01061 carboxymethylenebutenolidase [EC:3.1.1.45] | (RefSeq) endo-1,3;1,4-beta-D-glucanase-like (A)
IFM89_013083	K01184 polygalacturonase [EC:3.2.1.15] | (RefSeq) polygalacturonase-like (A)
novel.8219	K14514 ethylene-insensitive protein 3 | (RefSeq) protein ETHYLENE INSENSITIVE 3-like (A)
IFM89_032356	K13382 (S)-norcoclaurine synthase [EC:4.2.1.78] | (RefSeq) uncharacterized protein LOC113340282 (A)
IFM89_027170	K19613 leucine-rich repeat protein SHOC2 | (RefSeq) putative disease resistance RPP13-like protein 1 (A)
IFM89_017077	K03098 apolipoprotein D and lipocalin family protein | (RefSeq) temperature-induced lipocalin-1 (A)
novel.5523	K06180 23S rRNA pseudouridine1911/1915/1917 synthase [EC:5.4.99.23] | (RefSeq) pentatricopeptide repeat-containing protein At1g20230 isoform X1 (A)
IFM89_011538	K03857 phosphatidylinositol N-acetylglucosaminyltransferase subunit A [EC:2.4.1.198] | (RefSeq) phosphatidylinositol N-acetylglucosaminyltransferase gpi3 subunit-like (A)
IFM89_032983	K04079 molecular chaperone HtpG | (RefSeq) F-box/kelch-repeat protein At3g06240-like isoform X1 (A)
IFM89_010976	K03231 elongation factor 1-alpha | (RefSeq) elongation factor 1-alpha-like (A)
IFM89_015102	K13789 geranylgeranyl diphosphate synthase, type II [EC:2.5.1.1 2.5.1.10 2.5.1.29] | (RefSeq) heterodimeric geranylgeranyl pyrophosphate synthase small subunit, chloroplastic (A)
IFM89_021040	K03164 DNA topoisomerase II [EC:5.6.2.2] | (RefSeq) DNA topoisomerase 2-like (A)
IFM89_039194	K14792 rRNA biogenesis protein RRP5 | (RefSeq) rRNA biogenesis protein RRP5 isoform X1 (A)
IFM89_020712	K01728 pectate lyase [EC:4.2.2.2] | (RefSeq) pectate lyase 1-like (A)
IFM89_024490	K14293 importin subunit beta-1 | (RefSeq) importin subunit beta-1-like (A)
IFM89_037363	K18677 galacturonokinase [EC:2.7.1.44] | (RefSeq) galacturonokinase (A)
IFM89_002620	K13366 polyamine oxidase [EC:1.5.3.14 1.5.3.16 1.5.3.-] | (RefSeq) polyamine oxidase 6-like (A)
novel.6345	K16578 CLIP-associating protein 1/2 | (RefSeq) CLIP-associated protein-like (A)
IFM89_012424	K00327 NADPH-ferrihemoprotein reductase [EC:1.6.2.4] | (RefSeq) NADPH--cytochrome P450 reductase-like (A)
IFM89_010525	K13217 pre-mRNA-processing factor 39 | (RefSeq) pre-mRNA-processing factor 39-like isoform X1 (A)
IFM89_000562	K01853 cycloartenol synthase [EC:5.4.99.8] | (RefSeq) cycloartenol synthase 2 (A)
IFM89_033677	K11251 histone H2A | (RefSeq) probable histone H2A.1 (A)
IFM89_031818	K13691 pathogen-inducible salicylic acid glucosyltransferase [EC:2.4.1.-] | (RefSeq) mogroside IE synthase-like (A)
IFM89_032831	K12822 RNA-binding protein 25 | (RefSeq) RNA-binding protein 25-like (A)
IFM89_004513	K03139 transcription initiation factor TFIIF subunit beta [EC:5.6.2.-] | (RefSeq) transcription initiation factor IIF subunit beta (A)
IFM89_012591	K14975 codeine 3-O-demethylase [EC:1.14.11.32] | (RefSeq) codeine O-demethylase (A)
IFM89_015337	K12820 pre-mRNA-splicing factor ATP-dependent RNA helicase DHX15/PRP43 [EC:3.6.4.13] | (RefSeq) probable pre-mRNA-splicing factor ATP-dependent RNA helicase (A)
IFM89_030515	K01265 methionyl aminopeptidase [EC:3.4.11.18] | (RefSeq) methionine aminopeptidase 2B isoform X1 (A)
IFM89_017995	K06041 arabinose-5-phosphate isomerase [EC:5.3.1.13] | (RefSeq) probable arabinose 5-phosphate isomerase (A)
IFM89_037819	K02870 large subunit ribosomal protein L12e | (RefSeq) 60S ribosomal protein L12 (A)
IFM89_017800	K14948 polypyrimidine tract-binding protein 2 | (RefSeq) polypyrimidine tract-binding protein homolog 1-like isoform X1 (A)
IFM89_017519	K01426 amidase [EC:3.5.1.4] | (RefSeq) amidase 1 (A)
IFM89_016671	K21843 tetratricopeptide repeat protein 7 | (RefSeq) uncharacterized LOC104608456 (A)
IFM89_006417	K00134 glyceraldehyde 3-phosphate dehydrogenase (phosphorylating) [EC:1.2.1.12] | (RefSeq) glyceraldehyde-3-phosphate dehydrogenase, cytosolic (A)
IFM89_021734	K19729 guanine nucleotide-binding protein G(t) subunit alpha 3 | (RefSeq) guanine nucleotide-binding protein alpha-1 subunit-like (A)
IFM89_016516	K22794 flavonol-3-O-glucoside/galactoside glucosyltransferase [EC:2.4.1.239 2.4.1.-] | (RefSeq) anthocyanidin 3-O-glucoside 2''-O-glucosyltransferase-like (A)
IFM89_000677	K08057 calreticulin | (RefSeq) calreticulin (A)
IFM89_006165	K05387 glutamate receptor, ionotropic, plant | (RefSeq) glutamate receptor 2.2-like (A)
IFM89_013580	K07374 tubulin alpha | (RefSeq) tubulin alpha-5 chain (A)
novel.4949	K09313 homeobox protein cut-like | (RefSeq) protein CASP (A)
IFM89_020822	K00799 glutathione S-transferase [EC:2.5.1.18] | (RefSeq) microsomal glutathione S-transferase 3-like (A)
IFM89_023648	K09060 plant G-box-binding factor | (RefSeq) bZIP transcription factor 16 (A)
IFM89_012357	K05681 ATP-binding cassette, subfamily G (WHITE), member 2 | (RefSeq) ABC transporter G family member 5 (A)
IFM89_023666	K06678 condensin complex subunit 3 | (RefSeq) condensin complex subunit 3 (A)
IFM89_008112	K06630 14-3-3 protein epsilon | (RefSeq) 14-3-3-like protein GF14 iota (A)
IFM89_032109	K14975 codeine 3-O-demethylase [EC:1.14.11.32] | (RefSeq) codeine O-demethylase (A)
IFM89_017643	K13066 caffeic acid 3-O-methyltransferase / acetylserotonin O-methyltransferase [EC:2.1.1.68 2.1.1.4] | (RefSeq) caffeic acid 3-O-methyltransferase 1-like (A)
IFM89_016645	K16075 magnesium transporter | (RefSeq) magnesium transporter MRS2-3-like (A)
IFM89_002015	K16818 phospholipase A1 [EC:3.1.1.32] | (RefSeq) phospholipase A(1) DAD1, chloroplastic-like (A)
novel.8079	K02931 large subunit ribosomal protein L5 | (RefSeq) 50S ribosomal protein L5, chloroplastic (A)
IFM89_014002	K20359 PRA1 family protein 1 | (RefSeq) hypothetical protein (A)
IFM89_021592	K18787 thermospermine synthase [EC:2.5.1.79] | (RefSeq) thermospermine synthase ACAULIS5 (A)
novel.8688	K00815 tyrosine aminotransferase [EC:2.6.1.5] | (RefSeq) LOW QUALITY PROTEIN: tyrosine aminotransferase-like (A)
novel.4638	K05758 actin related protein 2/3 complex, subunit 2 | (RefSeq) LOW QUALITY PROTEIN: uncharacterized protein LOC106797677 (A)
IFM89_026727	K09875 aquaporin SIP | (RefSeq) aquaporin SIP1-2-like (A)
IFM89_034172	K17499 protein phosphatase 1G [EC:3.1.3.16] | (RefSeq) probable protein phosphatase 2C 60 (A)
novel.4994	K12842 U2-associated protein SR140 | (RefSeq) protein RRC1-like isoform X1 (A)
IFM89_002313	K03320 ammonium transporter, Amt family | (RefSeq) ammonium transporter 3 member 1-like (A)
IFM89_007700	K01899 succinyl-CoA synthetase alpha subunit [EC:6.2.1.4 6.2.1.5] | (RefSeq) succinate--CoA ligase [ADP-forming] subunit alpha, mitochondrial (A)
novel.4227	K00111 glycerol-3-phosphate dehydrogenase [EC:1.1.5.3] | (RefSeq) glycerol-3-phosphate dehydrogenase SDP6, mitochondrial-like (A)
IFM89_010703	K13457 disease resistance protein RPM1 | (RefSeq) probable disease resistance RPP8-like protein 2 (A)
IFM89_039455	K00799 glutathione S-transferase [EC:2.5.1.18] | (RefSeq) probable glutathione S-transferase (A)
IFM89_034391	K10859 DNA oxidative demethylase [EC:1.14.11.33] | (RefSeq) alpha-ketoglutarate-dependent dioxygenase alkB homolog 3-like (A)
IFM89_000116	K01555 fumarylacetoacetase [EC:3.7.1.2] | (RefSeq) fumarylacetoacetase (A)
IFM89_019847	K21866 ion channel POLLUX/CASTOR | (RefSeq) ion channel CASTOR-like isoform X1 (A)
IFM89_007607	K00451 homogentisate 1,2-dioxygenase [EC:1.13.11.5] | (RefSeq) homogentisate 1,2-dioxygenase isoform X1 (A)
IFM89_038479	K12818 ATP-dependent RNA helicase DHX8/PRP22 [EC:3.6.4.13] | (GenBank) NB-ARC domain disease resistance protein, putative (A)
IFM89_005793	K12309 beta-galactosidase [EC:3.2.1.23] | (RefSeq) beta-galactosidase 2 isoform X1 (A)
IFM89_038873	K16732 Ase1/PRC1/MAP65 family protein | (RefSeq) 65-kDa microtubule-associated protein 1-like (A)
IFM89_039640	K00924 kinase [EC:2.7.1.-] | (RefSeq) receptor-like protein kinase HSL1 (A)
IFM89_017742	K20870 putative beta-1,4-xylosyltransferase IRX10 [EC:2.4.2.-] | (RefSeq) uncharacterized protein LOC103932316 (A)
IFM89_033347	K13496 UDP-glucosyltransferase 73C [EC:2.4.1.-] | (RefSeq) UDP-glycosyltransferase 73C3-like isoform X1 (A)
IFM89_026253	K09571 FK506-binding protein 4/5 [EC:5.2.1.8] | (RefSeq) peptidyl-prolyl cis-trans isomerase FKBP62 (A)
IFM89_013921	K18532 adenylate kinase [EC:2.7.4.3] | (RefSeq) (R)-specific enoyl-CoA hydratase (A)
IFM89_003973	K23877 xyloglucan O-acetyltransferase | (RefSeq) protein ALTERED XYLOGLUCAN 4 (A)
IFM89_014009	K20869 putative beta-1,4-xylosyltransferase IRX9 [EC:2.4.2.-] | (RefSeq) probable beta-1,4-xylosyltransferase IRX9 (A)
novel.8024	K01409 N6-L-threonylcarbamoyladenine synthase [EC:2.3.1.234] | (RefSeq) probable tRNA N6-adenosine threonylcarbamoyltransferase (A)
IFM89_034040	K24917 amino acid permease | (RefSeq) amino acid permease 4-like (A)
IFM89_001408	K11855 ubiquitin carboxyl-terminal hydrolase 36/42 [EC:3.4.19.12] | (RefSeq) ubiquitin carboxyl-terminal hydrolase 23 (A)
novel.8385	K03246 translation initiation factor 3 subunit I | (RefSeq) eukaryotic translation initiation factor 3 subunit I-like (A)
IFM89_015955	K21843 tetratricopeptide repeat protein 7 | (RefSeq) tetratricopeptide repeat protein 7A-like (A)
IFM89_034116	K02942 large subunit ribosomal protein LP1 | (RefSeq) 60S acidic ribosomal protein P3-like (A)
IFM89_003769	K17479 glutaredoxin domain-containing cysteine-rich protein 1 | (RefSeq) uncharacterized protein At3g28850 (A)
IFM89_035919	K08726 soluble epoxide hydrolase / lipid-phosphate phosphatase [EC:3.3.2.10 3.1.3.76] | (RefSeq) uncharacterized protein LOC107492180 (A)
IFM89_008071	K09286 EREBP-like factor | (RefSeq) ethylene-responsive transcription factor 3-like (A)
IFM89_023040	K13348 protein Mpv17 | (RefSeq) protein Mpv17 (A)
IFM89_031892	K13258 2-hydroxyisoflavanone dehydratase [EC:4.2.1.105] | (RefSeq) uncharacterized protein LOC115994703 (A)
IFM89_015991	K03255 protein TIF31 | (RefSeq) protein TSS-like (A)
IFM89_031055	K13161 heterogeneous nuclear ribonucleoprotein R | (RefSeq) heterogeneous nuclear ribonucleoprotein R (A)
IFM89_033397	K00679 phospholipid:diacylglycerol acyltransferase [EC:2.3.1.158] | (RefSeq) hypothetical protein (A)
IFM89_002555	K07375 tubulin beta | (RefSeq) tubulin beta chain-like (A)
IFM89_012793	K01114 phospholipase C [EC:3.1.4.3] | (RefSeq) non-specific phospholipase C2-like (A)
IFM89_030824	K01456 peptide-N4-(N-acetyl-beta-glucosaminyl)asparagine amidase [EC:3.5.1.52] | (RefSeq) peptide-N(4)-(N-acetyl-beta- glucosaminyl)asparagine amidase isoform X1 (A)
IFM89_011449	K07375 tubulin beta | (RefSeq) uncharacterized protein LOC123070672 isoform X1 (A)
IFM89_039005	K13466 EIX receptor 1/2 | (RefSeq) receptor-like protein EIX2 (A)
IFM89_002552	K20523 SH3 domain-containing YSC84-like protein 1 | (RefSeq) uncharacterized LOC100242383 (A)
IFM89_013271	K10615 E3 ubiquitin-protein ligase HERC4 [EC:2.3.2.26] | (RefSeq) probable E3 ubiquitin-protein ligase HERC4 isoform X1 (A)
IFM89_036107	K10573 ubiquitin-conjugating enzyme E2 A [EC:2.3.2.23] | (RefSeq) ubiquitin-conjugating enzyme E2 2 (A)
novel.6709	K03327 multidrug resistance protein, MATE family | (RefSeq) protein DETOXIFICATION 34-like (A)
IFM89_036087	K05387 glutamate receptor, ionotropic, plant | (RefSeq) LOW QUALITY PROTEIN: glutamate receptor 2.3-like (A)
IFM89_009366	K04424 sterile alpha motif and leucine zipper containing kinase AZK [EC:2.7.11.25] | (RefSeq) probable serine/threonine-protein kinase SIS8 isoform X2 (A)
IFM89_021227	K14207 solute carrier family 38 (sodium-coupled neutral amino acid transporter), member 2 | (RefSeq) amino acid transporter AVT6A-like (A)
IFM89_025761	K14567 U3 small nucleolar RNA-associated protein 14 | (RefSeq) U3 small nucleolar RNA-associated protein 14 homolog A (A)
IFM89_004009	K11584 serine/threonine-protein phosphatase 2A regulatory subunit B' | (RefSeq) serine/threonine protein phosphatase 2A 59 kDa regulatory subunit B' gamma isoform-like (A)
novel.981	K14572 midasin | (RefSeq) LOW QUALITY PROTEIN: midasin-like (A)
IFM89_003208	K22940 protein YIPF1/2 | (RefSeq) protein YIPF1 homolog (A)
IFM89_021326	K11649 SWI/SNF-related matrix-associated actin-dependent regulator of chromatin subfamily C | (GenBank) F-box and associated interaction domain protein (A)
IFM89_034769	K20562 biphenyl-4-hydroxylase | (RefSeq) cytochrome P450 CYP736A12-like (A)
IFM89_037730	K10144 RING finger and CHY zinc finger domain-containing protein 1 [EC:2.3.2.27] | (RefSeq) E3 ubiquitin-protein ligase MIEL1 isoform X1 (A)
IFM89_030580	K20562 biphenyl-4-hydroxylase | (RefSeq) cytochrome P450 71AU50-like (A)
novel.3101	K18158 nuclear control of ATPase protein 2 | (RefSeq) protein DGS1, mitochondrial-like (A)
IFM89_006520	K14489 arabidopsis histidine kinase 2/3/4 (cytokinin receptor) [EC:2.7.13.3] | (RefSeq) histidine kinase 3-like (A)
IFM89_032452	K14494 DELLA protein | (RefSeq) LOW QUALITY PROTEIN: DELLA protein GAIP (A)
IFM89_031385	K00850 6-phosphofructokinase 1 [EC:2.7.1.11] | (RefSeq) ATP-dependent 6-phosphofructokinase 2 (A)
IFM89_032681	K00307 reticuline oxidase [EC:1.21.3.3] | (RefSeq) reticuline oxidase (A)
IFM89_021655	K13395 (S)-stylopine/(S)-canadine/(S)-nandinine synthase [EC:1.14.19.64 1.14.19.68 1.14.19.73] | (RefSeq) (S)-stylopine synthase 1-like (A)
IFM89_037103	K24188 cytochrome P450 family 93 subfamily A [EC:1.14.-.-] | (RefSeq) cytochrome P450 93A3-like (A)
novel.6831	K02976 small subunit ribosomal protein S26e | (RefSeq) 40S ribosomal protein S26-1 (A)
IFM89_039410	K11985 TRAF-interacting protein [EC:2.3.2.27] | (RefSeq) uncharacterized protein LOC122663956 isoform X1 (A)
IFM89_017645	K09489 heat shock 70kDa protein 4 | (RefSeq) heat shock 70 kDa protein 15-like (A)
IFM89_005742	K00475 naringenin 3-dioxygenase [EC:1.14.11.9] | (RefSeq) naringenin,2-oxoglutarate 3-dioxygenase (A)
IFM89_028097	K03327 multidrug resistance protein, MATE family | (RefSeq) LOW QUALITY PROTEIN: protein DETOXIFICATION 41 (A)
IFM89_006107	K08912 light-harvesting complex II chlorophyll a/b binding protein 1 | (RefSeq) chlorophyll a-b binding protein of LHCII type 1-like (A)
IFM89_022036	K00924 kinase [EC:2.7.1.-] | (RefSeq) receptor protein kinase CLAVATA1 (A)
IFM89_015501	K03687 molecular chaperone GrpE | (RefSeq) uncharacterized protein LOC108846391 (A)
IFM89_033645	K14308 nuclear pore complex protein Nup54 | (RefSeq) LOW QUALITY PROTEIN: uncharacterized protein LOC106359187 (A)
IFM89_011087	K13066 caffeic acid 3-O-methyltransferase / acetylserotonin O-methyltransferase [EC:2.1.1.68 2.1.1.4] | (RefSeq) caffeic acid 3-O-methyltransferase 1-like (A)
IFM89_005280	K24926 tetratricopeptide repeat protein 1 | (RefSeq) hypothetical protein (A)
IFM89_021674	K12309 beta-galactosidase [EC:3.2.1.23] | (RefSeq) beta-galactosidase 2 (A)
IFM89_032839	K04498 E1A/CREB-binding protein [EC:2.3.1.48] | (RefSeq) histone acetyltransferase HAC1-like isoform X1 (A)
IFM89_032939	K01802 peptidylprolyl isomerase [EC:5.2.1.8] | (RefSeq) photosynthetic NDH subunit of lumenal location 4, chloroplastic isoform X1 (A)
IFM89_020545	K10704 ubiquitin-conjugating enzyme E2 variant | (RefSeq) ubiquitin-conjugating enzyme E2 variant 1C-like isoform X1 (A)
IFM89_012170	K08235 xyloglucan:xyloglucosyl transferase [EC:2.4.1.207] | (RefSeq) probable xyloglucan endotransglucosylase/hydrolase protein 32 (A)
IFM89_006112	K20718 LRR receptor-like serine/threonine-protein kinase ERECTA [EC:2.7.11.1] | (RefSeq) LRR receptor-like serine/threonine-protein kinase ERL1 (A)
IFM89_005176	K04424 sterile alpha motif and leucine zipper containing kinase AZK [EC:2.7.11.25] | (RefSeq) serine/threonine-protein kinase EDR1 isoform X1 (A)
novel.8341	K19825 2-alkenal reductase (NADP+) [EC:1.3.1.102] | (RefSeq) 2-alkenal reductase (NADP(+)-dependent)-like (A)
IFM89_038513	K05666 ATP-binding cassette, subfamily C (CFTR/MRP), member 2 | (RefSeq) ABC transporter C family member 10-like (A)
IFM89_004764	K14506 jasmonic acid-amino synthetase [EC:6.3.2.52] | (RefSeq) uncharacterized LOC109115461 (A)
IFM89_027568	K00430 peroxidase [EC:1.11.1.7] | (RefSeq) peroxidase 47-like (A)
IFM89_026968	K05749 cytoplasmic FMR1 interacting protein | (RefSeq) protein PIR (A)
IFM89_016841	K13229 2,4-dihydroxy-1,4-benzoxazin-3-one-glucoside dioxygenase [EC:1.14.11.59] | (RefSeq) DIBOA-glucoside dioxygenase BX6 (A)
IFM89_031558	K15333 tRNA guanosine-2'-O-methyltransferase [EC:2.1.1.34] | (RefSeq) uncharacterized protein LOC104224633 (A)
IFM89_029110	K14409 protein SMG7 | (RefSeq) protein SMG7-like isoform X1 (A)
IFM89_016922	K01736 chorismate synthase [EC:4.2.3.5] | (RefSeq) chorismate synthase, chloroplastic-like (A)
IFM89_032068	K11420 [histone H3]-lysine9 N-trimethyltransferase EHMT [EC:2.1.1.355] | (RefSeq) histone-lysine N-methyltransferase, H3 lysine-9 specific SUVH6-like (A)
novel.840	K00555 tRNA (guanine26-N2/guanine27-N2)-dimethyltransferase [EC:2.1.1.215 2.1.1.216] | (GenBank) N(2),N(2)-dimethylguanosine tRNA methyltransferase, putative (A)
IFM89_020636	K12451 3,5-epimerase/4-reductase [EC:5.1.3.- 1.1.1.-] | (RefSeq) bifunctional dTDP-4-dehydrorhamnose 3,5-epimerase/dTDP-4-dehydrorhamnose reductase (A)
IFM89_027935	K12125 protein EARLY FLOWERING 3 | (RefSeq) protein HEADING DATE 3B (A)
IFM89_011501	K14490 histidine-containing phosphotransfer peotein | (RefSeq) histidine-containing phosphotransfer protein 4-like (A)
IFM89_033124	K13422 transcription factor MYC2 | (RefSeq) transcription factor MYC2-like (A)
IFM89_004264	K12355 coniferyl-aldehyde dehydrogenase [EC:1.2.1.68] | (RefSeq) aldehyde dehydrogenase family 2 member C4-like (A)
novel.2920	K12893 serine/arginine-rich splicing factor 4/5/6 | (RefSeq) serine/arginine-rich splicing factor RS31 (A)
IFM89_002799	K00850 6-phosphofructokinase 1 [EC:2.7.1.11] | (RefSeq) ATP-dependent 6-phosphofructokinase 6-like (A)
IFM89_001669	K00521 ferric-chelate reductase [EC:1.16.1.7] | (RefSeq) ferric reduction oxidase 7, chloroplastic-like (A)
IFM89_004445	K03798 cell division protease FtsH [EC:3.4.24.-] | (RefSeq) ATP-dependent zinc metalloprotease FTSH 12, chloroplastic (A)
IFM89_036718	K03115 casein kinase II subunit beta | (RefSeq) putative casein kinase II subunit beta-4 (A)
IFM89_035262	K00605 aminomethyltransferase [EC:2.1.2.10] | (RefSeq) aminomethyltransferase, mitochondrial-like (A)
IFM89_018664	K03283 heat shock 70kDa protein 1/2/6/8 | (RefSeq) heat shock cognate 70 kDa protein 2-like (A)
IFM89_034303	K09422 transcription factor MYB, plant | (RefSeq) MYB-like transcription factor ODO1 (A)
IFM89_021699	K11254 histone H4 | (RefSeq) histone H4 (A)
IFM89_017460	K01897 long-chain acyl-CoA synthetase [EC:6.2.1.3] | (RefSeq) probable acyl-activating enzyme 16, chloroplastic isoform X1 (A)
IFM89_017974	K00924 kinase [EC:2.7.1.-] | (RefSeq) receptor protein kinase TMK1 (A)
IFM89_035281	K08245 phytepsin [EC:3.4.23.40] | (RefSeq) aspartic proteinase A1-like (A)
IFM89_037667	K14491 two-component response regulator ARR-B family | (RefSeq) two-component response regulator ORR22-like isoform X1 (A)
IFM89_021044	K03164 DNA topoisomerase II [EC:5.6.2.2] | (RefSeq) DNA topoisomerase 2-like (A)
IFM89_036042	K13412 calcium-dependent protein kinase [EC:2.7.11.1] | (RefSeq) calcium-dependent protein kinase 17-like (A)
IFM89_028762	K07375 tubulin beta | (RefSeq) tubulin beta chain (A)
IFM89_022728	K13430 serine/threonine-protein kinase PBS1 [EC:2.7.11.1] | (RefSeq) serine/threonine-protein kinase CDL1-like (A)
IFM89_019668	K01728 pectate lyase [EC:4.2.2.2] | (RefSeq) probable pectate lyase 8 (A)
IFM89_029680	K16241 transcription factor HY5 | (RefSeq) uncharacterized protein LOC100383828 (A)
IFM89_036270	K00058 D-3-phosphoglycerate dehydrogenase / 2-oxoglutarate reductase [EC:1.1.1.95 1.1.1.399] | (RefSeq) D-3-phosphoglycerate dehydrogenase 1, chloroplastic-like (A)
novel.8057	K01859 chalcone isomerase [EC:5.5.1.6] | (RefSeq) vacuolar-sorting receptor 1 (A)
IFM89_033036	K13384 (RS)-1-benzyl-1,2,3,4-tetrahydroisoquinoline N-methyltransferase [EC:2.1.1.115 2.1.1.140] | (RefSeq) (S)-coclaurine N-methyltransferase (A)
IFM89_004052	K18368 caffeoylshikimate esterase [EC:3.1.1.-] | (RefSeq) caffeoylshikimate esterase (A)
IFM89_025791	K11866 STAM-binding protein [EC:3.4.19.12] | (RefSeq) AMSH-like ubiquitin thioesterase 3 (A)
IFM89_005618	K04487 cysteine desulfurase [EC:2.8.1.7] | (RefSeq) cysteine desulfurase, mitochondrial (A)
IFM89_023799	K02942 large subunit ribosomal protein LP1 | (RefSeq) 60S acidic ribosomal protein P1-like (A)
novel.4652	K22683 aspartyl protease family protein [EC:3.4.23.-] | (RefSeq) protein ASPARTIC PROTEASE IN GUARD CELL 1-like (A)
IFM89_004990	K01184 polygalacturonase [EC:3.2.1.15] | (RefSeq) probable polygalacturonase At3g15720 (A)
IFM89_019657	K00679 phospholipid:diacylglycerol acyltransferase [EC:2.3.1.158] | (RefSeq) hypothetical protein (A)
IFM89_008844	K13422 transcription factor MYC2 | (RefSeq) transcription factor MYC2 (A)
IFM89_016544	K11855 ubiquitin carboxyl-terminal hydrolase 36/42 [EC:3.4.19.12] | (RefSeq) ubiquitin carboxyl-terminal hydrolase 36 (A)
IFM89_003489	K12153 phenylalanine N-monooxygenase [EC:1.14.14.40] | (RefSeq) tryptophan N-monooxygenase CYP79A68-like (A)
IFM89_012141	K02433 aspartyl-tRNA(Asn)/glutamyl-tRNA(Gln) amidotransferase subunit A [EC:6.3.5.6 6.3.5.7] | (RefSeq) Glutamyl-tRNA(Gln) amidotransferase subunit A (A)
novel.3352	K22073 transferase CAF17, mitochondrial [EC:2.1.-.-] | (RefSeq) putative transferase At4g12130, mitochondrial (A)
IFM89_010994	K08237 hydroquinone glucosyltransferase [EC:2.4.1.218] | (RefSeq) hydroquinone glucosyltransferase-like (A)
IFM89_012278	K13071 pheophorbide a oxygenase [EC:1.14.15.17] | (RefSeq) pheophorbide a oxygenase, chloroplastic (A)
IFM89_011972	K07952 ADP-ribosylation factor related protein 1 | (RefSeq) ADP-ribosylation factor-related protein 1 (A)
IFM89_030880	K20495 long-chain fatty acid omega-monooxygenase [EC:1.14.14.80] | (RefSeq) cytochrome P450 704B1 (A)
IFM89_002143	K08912 light-harvesting complex II chlorophyll a/b binding protein 1 | (RefSeq) chlorophyll a-b binding protein of LHCII type 1-like (A)
IFM89_014903	K17471 sulfate transporter 3 | (RefSeq) probable sulfate transporter 3.3 (A)
IFM89_004485	K12842 U2-associated protein SR140 | (RefSeq) U2 snRNP-associated SURP motif-containing protein (A)
IFM89_028878	K11584 serine/threonine-protein phosphatase 2A regulatory subunit B' | (RefSeq) serine/threonine protein phosphatase 2A 57 kDa regulatory subunit B' beta isoform (A)
IFM89_012779	K21596 calmodulin-binding transcription activator | (RefSeq) calmodulin-binding transcription activator 3-like isoform X1 (A)
IFM89_011002	K09338 homeobox-leucine zipper protein | (RefSeq) homeobox-leucine zipper protein ATHB-40 (A)
IFM89_004452	K05750 NCK-associated protein 1 | (RefSeq) protein NAP1 (A)
IFM89_010163	K10663 E3 ubiquitin-protein ligase ATL4 [EC:2.3.2.27] | (RefSeq) putative RING-H2 finger protein ATL49 (A)
IFM89_019902	K22390 acid phosphatase type 7 | (RefSeq) purple acid phosphatase 15-like (A)
IFM89_004225	K11584 serine/threonine-protein phosphatase 2A regulatory subunit B' | (RefSeq) serine/threonine protein phosphatase 2A 57 kDa regulatory subunit B' iota isoform-like (A)
IFM89_020983	K15333 tRNA guanosine-2'-O-methyltransferase [EC:2.1.1.34] | (RefSeq) uncharacterized protein LOC104224633 (A)
IFM89_036077	K01184 polygalacturonase [EC:3.2.1.15] | (RefSeq) polygalacturonase QRT2-like (A)
IFM89_003574	K01620 threonine aldolase [EC:4.1.2.48] | (RefSeq) probable low-specificity L-threonine aldolase 1 isoform X1 (A)
IFM89_031353	K09422 transcription factor MYB, plant | (RefSeq) uncharacterized LOC104597747 (A)
IFM89_001317	K08909 light-harvesting complex I chlorophyll a/b binding protein 3 | (RefSeq) chlorophyll a-b binding protein 8, chloroplastic (A)
IFM89_001502	K01176 alpha-amylase [EC:3.2.1.1] | (RefSeq) alpha-amylase isozyme 2A (A)
IFM89_003672	K05759 profilin | (RefSeq) uncharacterized protein LOC103842625 isoform X1 (A)
novel.8247	K09338 homeobox-leucine zipper protein | (RefSeq) homeobox-leucine zipper protein ROC8-like isoform X1 (A)
IFM89_006139	K13258 2-hydroxyisoflavanone dehydratase [EC:4.2.1.105] | (RefSeq) 2-hydroxyisoflavanone dehydratase (A)
IFM89_014828	K18266 protein NDRG1 | (RefSeq) pollen-specific protein SF21 isoform X2 (A)
IFM89_012601	K05350 beta-glucosidase [EC:3.2.1.21] | (RefSeq) beta-glucosidase 18-like (A)
IFM89_000515	K13430 serine/threonine-protein kinase PBS1 [EC:2.7.11.1] | (RefSeq) hypothetical protein (A)
novel.305	K14570 RNA exonuclease [EC:3.1.-.-] | (RefSeq) small RNA degrading nuclease 1-like (A)
IFM89_003785	K24193 MFS transporter, SP family, sugar:H+ symporter | (RefSeq) sugar transport protein 14-like (A)
novel.6808	K17761 succinate-semialdehyde dehydrogenase, mitochondrial [EC:1.2.1.24] | (RefSeq) succinate-semialdehyde dehydrogenase, mitochondrial (A)
IFM89_037272	K03255 protein TIF31 | (RefSeq) protein TSS (A)
IFM89_036790	K03248 translation initiation factor 3 subunit G | (RefSeq) eukaryotic translation initiation factor 3 subunit G-like (A)
IFM89_011851	K12825 splicing factor 3A subunit 1 | (RefSeq) probable splicing factor 3A subunit 1 (A)
IFM89_012243	K15400 omega-hydroxypalmitate O-feruloyl transferase [EC:2.3.1.188] | (RefSeq) omega-hydroxypalmitate O-feruloyl transferase (A)
IFM89_023376	K17560 unconventional prefoldin RPB5 interactor 1 | (RefSeq) RNA polymerase II subunit 5-mediating protein homolog isoform X1 (A)
IFM89_001074	K00430 peroxidase [EC:1.11.1.7] | (RefSeq) cationic peroxidase 2-like (A)
IFM89_029533	K20069 adaptin ear-binding coat-associated protein 1/2 | (RefSeq) uncharacterized protein At1g03900 (A)
IFM89_017600	K00799 glutathione S-transferase [EC:2.5.1.18] | (RefSeq) glutathione S-transferase F10-like (A)
IFM89_033250	K07893 Ras-related protein Rab-6A | (RefSeq) ras-related protein RABH1b-like (A)
novel.1568	K11878 proteasome assembly chaperone 4 | (RefSeq) uncharacterized protein LOC113312884 (A)
IFM89_032065	K03100 signal peptidase I [EC:3.4.21.89] | (RefSeq) probable thylakoidal processing peptidase 2, chloroplastic (A)
IFM89_023612	K11368 enhancer of yellow 2 transcription factor | (RefSeq) transcription and mRNA export factor ENY2-like (A)
IFM89_010586	K09584 protein disulfide-isomerase A6 [EC:5.3.4.1] | (RefSeq) probable protein disulfide-isomerase A6 (A)
IFM89_031343	K16222 Dof zinc finger protein DOF5.5 | (RefSeq) cyclic dof factor 1-like (A)
IFM89_016305	K04733 interleukin-1 receptor-associated kinase 4 [EC:2.7.11.1] | (RefSeq) proline-rich receptor-like protein kinase PERK12 (A)
IFM89_016159	K21888 glutathione dehydrogenase/transferase [EC:1.8.5.1 2.5.1.18] | (RefSeq) glutathione S-transferase DHAR2-like (A)
IFM89_005798	K16290 xylem cysteine proteinase [EC:3.4.22.-] | (RefSeq) cysteine protease XCP1-like (A)
IFM89_033585	K12818 ATP-dependent RNA helicase DHX8/PRP22 [EC:3.6.4.13] | (RefSeq) hypothetical protein (A)
IFM89_017054	K06268 serine/threonine-protein phosphatase 2B regulatory subunit | (RefSeq) calcineurin B-like protein 7 isoform X1 (A)
IFM89_018529	K09422 transcription factor MYB, plant | (RefSeq) transcription factor LAF1-like (A)
IFM89_009007	K01568 pyruvate decarboxylase [EC:4.1.1.1] | (RefSeq) pyruvate decarboxylase 2-like (A)
IFM89_021953	K00454 lipoxygenase [EC:1.13.11.12] | (RefSeq) linoleate 13S-lipoxygenase 2-1, chloroplastic (A)
novel.4436	K17604 zinc finger SWIM domain-containing protein 3 | (RefSeq) protein FAR1-RELATED SEQUENCE 1-like (A)
IFM89_013823	K11592 endoribonuclease Dicer [EC:3.1.26.-] | (RefSeq) endoribonuclease Dicer homolog 1 (A)
IFM89_017356	K16297 serine carboxypeptidase-like clade II [EC:3.4.16.-] | (RefSeq) serine carboxypeptidase-like 40 (A)
IFM89_031757	K09286 EREBP-like factor | (RefSeq) ethylene-responsive transcription factor 4-like (A)
IFM89_037638	K02212 DNA replication licensing factor MCM4 [EC:5.6.2.3] | (RefSeq) DNA replication licensing factor MCM4 (A)
IFM89_036384	K00559 sterol 24-C-methyltransferase [EC:2.1.1.41] | (RefSeq) cycloartenol-C-24-methyltransferase (A)
IFM89_019662	K20359 PRA1 family protein 1 | (RefSeq) hypothetical protein (A)
IFM89_020527	K16732 Ase1/PRC1/MAP65 family protein | (RefSeq) LOW QUALITY PROTEIN: 65-kDa microtubule-associated protein 1-like (A)
IFM89_010496	K00679 phospholipid:diacylglycerol acyltransferase [EC:2.3.1.158] | (RefSeq) putative phospholipid:diacylglycerol acyltransferase 2 (A)
IFM89_013470	K13422 transcription factor MYC2 | (RefSeq) transcription factor MYC4-like (A)
IFM89_038470	K03136 transcription initiation factor TFIIE subunit alpha | (RefSeq) transcription initiation factor IIE subunit alpha (A)
IFM89_028740	K19996 phosphatidylinositol transfer protein SFH5 | (RefSeq) patellin-4-like (A)
IFM89_023251	K14859 ribosome biogenesis protein SSF1/2 | (RefSeq) peter Pan-like protein (A)
IFM89_001599	K16903 L-tryptophan---pyruvate aminotransferase [EC:2.6.1.99] | (RefSeq) tryptophan aminotransferase-related protein 1-like (A)
IFM89_009659	K03695 ATP-dependent Clp protease ATP-binding subunit ClpB | (RefSeq) chaperone protein ClpB1-like (A)
IFM89_022998	K20368 protein cornichon | (RefSeq) protein cornichon homolog 4 (A)
IFM89_031552	K09775 uncharacterized protein | (RefSeq) uncharacterized protein LOC111283728 isoform X1 (A)
IFM89_028571	K21776 protein lin-54 | (RefSeq) Lin-54-like protein (A)
IFM89_034839	K01054 acylglycerol lipase [EC:3.1.1.23] | (RefSeq) caffeoylshikimate esterase-like (A)
IFM89_017907	K23541 Ca2+/H+ antiporter, TMEM165/GDT1 family | (RefSeq) putative pentatricopeptide repeat-containing protein At3g23330 (A)
IFM89_014886	K22883 L-ornithine N5-acetyltransferase [EC:2.3.1.-] | (RefSeq) probable acetyltransferase NATA1-like (A)
IFM89_001467	K16818 phospholipase A1 [EC:3.1.1.32] | (RefSeq) phospholipase A(1) DAD1, chloroplastic (A)
IFM89_022376	K09338 homeobox-leucine zipper protein | (RefSeq) homeobox-leucine zipper protein ATHB-13-like (A)
IFM89_010161	K14771 U3 small nucleolar RNA-associated protein 19 | (RefSeq) uncharacterized protein LOC104415905 isoform X1 (A)
IFM89_023635	K20617 cytochrome P450 family 71 subfamily A | (RefSeq) CYP71AH2; cytochrome P450 71A9-like (A)
IFM89_002969	K03650 tRNA modification GTPase [EC:3.6.-.-] | (RefSeq) tRNA modification GTPase MnmE-like isoform X1 (A)
IFM89_037672	K16569 gamma-tubulin complex component 2 | (RefSeq) LOW QUALITY PROTEIN: gamma-tubulin complex component 2 (A)
IFM89_002353	K01695 tryptophan synthase alpha chain [EC:4.2.1.20] | (RefSeq) tryptophan synthase alpha chain-like isoform X1 (A)
IFM89_017631	K13264 isoflavone 7-O-glucoside-6''-O-malonyltransferase [EC:2.3.1.115] | (Kazusa) Lj2g3v1090790.1; - (A)
IFM89_026032	K07766 diphosphoinositol-polyphosphate diphosphatase [EC:3.6.1.52] | (RefSeq) nudix hydrolase 16, mitochondrial-like (A)
IFM89_039875	K00873 pyruvate kinase [EC:2.7.1.40] | (RefSeq) plastidial pyruvate kinase 2 (A)
IFM89_033609	K14491 two-component response regulator ARR-B family | (RefSeq) two-component response regulator ORR25-like (A)
IFM89_034902	K12590 exosome complex component RRP46 | (RefSeq) exosome complex exonuclease RRP46 homolog (A)
IFM89_007550	K19825 2-alkenal reductase (NADP+) [EC:1.3.1.102] | (RefSeq) 2-alkenal reductase (NADP(+)-dependent)-like (A)
IFM89_008574	K22706 (R)-mandelonitrile beta-glucosyltransferase [EC:2.4.1.354] | (RefSeq) 7-deoxyloganetin glucosyltransferase-like (A)
IFM89_015948	K21995 cytochrome P450 family 77 subfamily A [EC:1.14.-.-] | (RefSeq) cytochrome P450 77A2-like (A)
novel.3666	K11253 histone H3 | (RefSeq) histone H3.2-like (A)
IFM89_023474	K11252 histone H2B | (RefSeq) histone H1-II-like (A)
IFM89_019326	K10389 tubulin gamma | (RefSeq) tubulin gamma-1 chain (A)
IFM89_019402	K03294 basic amino acid/polyamine antiporter, APA family | (RefSeq) cationic amino acid transporter 1-like (A)
IFM89_030408	K04681 retinoblastoma-like protein 1 | (RefSeq) retinoblastoma-related protein-like (A)
IFM89_013424	K07025 putative hydrolase of the HAD superfamily | (RefSeq) uncharacterized protein LOC114292903 (A)
IFM89_015879	K14490 histidine-containing phosphotransfer peotein | (RefSeq) histidine-containing phosphotransfer protein 1 isoform X1 (A)
IFM89_024248	K14840 nucleolar protein 53 | (RefSeq) ribosome biogenesis protein NOP53 (A)
IFM89_028296	K00784 ribonuclease Z [EC:3.1.26.11] | (RefSeq) tRNase Z TRZ1 isoform X1 (A)
IFM89_029360	K12623 U6 snRNA-associated Sm-like protein LSm4 | (RefSeq) sm-like protein LSM4 isoform X1 (A)
novel.3487	K11253 histone H3 | (RefSeq) uncharacterized protein LOC110629262 (A)
IFM89_016220	K08150 MFS transporter, SP family, solute carrier family 2 (myo-inositol transporter), member 13 | (RefSeq) inositol transporter 1-like (A)
IFM89_033857	K15283 solute carrier family 35, member E1 | (RefSeq) phosphoenolpyruvate/phosphate translocator 1, chloroplastic-like (A)
novel.8750	K15692 E3 ubiquitin-protein ligase RNF13 [EC:2.3.2.27] | (RefSeq) RING-H2 finger protein ATL3-like (A)
IFM89_038865	K16578 CLIP-associating protein 1/2 | (RefSeq) CLIP-associated protein-like (A)
IFM89_013928	K22395 cinnamyl-alcohol dehydrogenase [EC:1.1.1.195] | (RefSeq) berberine bridge enzyme-like 15 (A)
IFM89_012575	K07375 tubulin beta | (RefSeq) tubulin beta-1 chain (A)
IFM89_024884	K02865 large subunit ribosomal protein L10Ae | (RefSeq) 60S ribosomal protein L10a (A)
IFM89_007997	K24175 MFS transporter, MFS domain-containing protein family, molybdate-anion transporter | (RefSeq) molybdate-anion transporter (A)
novel.7342	K22804 structural maintenance of chromosomes protein 6 | (RefSeq) structural maintenance of chromosomes protein 6B-like (A)
IFM89_028066	K01962 acetyl-CoA carboxylase carboxyl transferase subunit alpha [EC:6.4.1.2 2.1.3.15] | (RefSeq) acetyl-coenzyme A carboxylase carboxyl transferase subunit alpha, chloroplastic (A)
IFM89_007923	K03860 phosphatidylinositol N-acetylglucosaminyltransferase subunit Q | (RefSeq) N-acetylglucosaminyl-phosphatidylinositol biosynthetic protein gpi1-like (A)
IFM89_010375	K15014 solute carrier family 29 (equilibrative nucleoside transporter), member 1/2/3 | (RefSeq) equilibrative nucleotide transporter 8-like (A)
IFM89_008155	K04460 serine/threonine-protein phosphatase 5 [EC:3.1.3.16] | (RefSeq) serine/threonine-protein phosphatase 7-like (A)
IFM89_037305	K05933 aminocyclopropanecarboxylate oxidase [EC:1.14.17.4] | (RefSeq) 1-aminocyclopropane-1-carboxylate oxidase 3 (A)
IFM89_001598	K16903 L-tryptophan---pyruvate aminotransferase [EC:2.6.1.99] | (RefSeq) tryptophan aminotransferase-related protein 1-like (A)
novel.8969	K06158 ATP-binding cassette, subfamily F, member 3 | (RefSeq) ABC transporter F family member 3 isoform X1 (A)
IFM89_021795	K11253 histone H3 | (RefSeq) histone H3.2-like (A)
IFM89_038967	K18670 dual specificity protein kinase YAK1 [EC:2.7.12.1] | (RefSeq) serine/threonine-protein kinase ppk15 (A)
IFM89_039773	K17046 protein DEK | (RefSeq) hypothetical protein (A)
IFM89_014500	K01802 peptidylprolyl isomerase [EC:5.2.1.8] | (RefSeq) peptidyl-prolyl cis-trans isomerase-like (A)
IFM89_021361	K08237 hydroquinone glucosyltransferase [EC:2.4.1.218] | (RefSeq) hydroquinone glucosyltransferase (A)
IFM89_028524	K13201 nucleolysin TIA-1/TIAR | (RefSeq) oligouridylate-binding protein 1B (A)
IFM89_017626	K02717 photosystem II oxygen-evolving enhancer protein 2 | (RefSeq) oxygen-evolving enhancer protein 2, chloroplastic-like (A)
IFM89_020728	K02953 small subunit ribosomal protein S13e | (RefSeq) Ribosomal protein S13/S15 (A)
IFM89_021299	K12816 pre-mRNA-processing factor 17 | (RefSeq) pre-mRNA-processing factor 17-like isoform X1 (A)
IFM89_015826	K00799 glutathione S-transferase [EC:2.5.1.18] | (RefSeq) glutathione S-transferase F13 (A)
IFM89_005561	K23948 NADH:quinone reductase (non-electrogenic) [EC:1.6.5.9] | (RefSeq) hypothetical protein (A)
IFM89_014774	K09755 ferulate-5-hydroxylase [EC:1.14.-.-] | (RefSeq) cytochrome P450 84A1-like (A)
IFM89_036191	K01188 beta-glucosidase [EC:3.2.1.21] | (RefSeq) beta-glucosidase 31-like (A)
IFM89_019417	K13430 serine/threonine-protein kinase PBS1 [EC:2.7.11.1] | (RefSeq) serine/threonine-protein kinase PBS1 (A)
novel.1579	K17098 annexin D | (RefSeq) annexin-like protein RJ4 (A)
IFM89_010103	K00485 dimethylaniline monooxygenase (N-oxide forming) / hypotaurine monooxygenase [EC:1.14.13.8 1.8.1.-] | (RefSeq) probable flavin-containing monooxygenase 1 (A)
novel.7458	K12598 ATP-dependent RNA helicase DOB1 [EC:3.6.4.13] | (RefSeq) DExH-box ATP-dependent RNA helicase DExH10-like (A)
IFM89_032409	K09338 homeobox-leucine zipper protein | (RefSeq) homeobox-leucine zipper protein HDG2-like isoform X1 (A)
IFM89_028986	K01535 H+-transporting ATPase [EC:7.1.2.1] | (RefSeq) ATPase 5, plasma membrane-type-like (A)
IFM89_001021	K11253 histone H3 | (RefSeq) histone H3.2 (A)
IFM89_007897	K08486 syntaxin 1B/2/3 | (RefSeq) syntaxin-132-like (A)
IFM89_032845	K08272 calcium binding protein 39 | (RefSeq) putative MO25-like protein At5g47540 (A)
IFM89_020334	K05236 coatomer subunit alpha | (RefSeq) coatomer subunit alpha-1-like (A)
IFM89_037546	K02692 photosystem I subunit II | (RefSeq) photosystem I reaction center subunit II, chloroplastic (A)
IFM89_038814	K15501 serine/threonine-protein phosphatase 6 regulatory subunit 3 | (RefSeq) serine/threonine-protein phosphatase 6 regulatory subunit 2-like isoform X1 (A)
novel.5480	K17710 pentatricopeptide repeat domain-containing protein 1 | (RefSeq) pentatricopeptide repeat-containing protein At2g18940, chloroplastic (A)
IFM89_017236	K24188 cytochrome P450 family 93 subfamily A [EC:1.14.-.-] | (RefSeq) cytochrome P450 93A3-like (A)
IFM89_036408	K01858 myo-inositol-1-phosphate synthase [EC:5.5.1.4] | (RefSeq) inositol-3-phosphate synthase (A)
IFM89_023180	K11673 actin-related protein 8 | (RefSeq) actin-related protein 9-like (A)
IFM89_018353	K25193 serine decarboxylase [EC:4.1.1.-] | (RefSeq) serine decarboxylase-like (A)
IFM89_028657	K11380 NuA3 HAT complex component NTO1 | (RefSeq) protein Jade-1-like (A)
IFM89_013531	K19613 leucine-rich repeat protein SHOC2 | (RefSeq) probable leucine-rich repeat receptor-like protein kinase At5g49770 (A)
IFM89_014790	K11593 eukaryotic translation initiation factor 2C | (RefSeq) protein argonaute 4-like (A)
IFM89_009836	K05681 ATP-binding cassette, subfamily G (WHITE), member 2 | (RefSeq) ABC transporter G family member 25 (A)
IFM89_039035	K10669 2'-phosphotransferase [EC:2.7.1.160] | (RefSeq) tRNA 2'-phosphotransferase 1-like (A)
IFM89_018180	K23872 putative homogalacturonan methyltransferase [EC:2.1.1.-] | (RefSeq) hypothetical protein (A)
IFM89_026940	K09499 T-complex protein 1 subunit eta | (RefSeq) T-complex protein 1 subunit eta-like (A)
IFM89_036902	K15979 staphylococcal nuclease domain-containing protein 1 | (RefSeq) staphylococcal nuclease domain-containing protein 1 (A)
IFM89_033444	K13172 serine/arginine repetitive matrix protein 2 | (RefSeq) uncharacterized protein LOC112285844 isoform X1 (A)
IFM89_002829	K11876 proteasome assembly chaperone 2 | (RefSeq) proteasome assembly chaperone 2 (A)
IFM89_039540	K22736 vacuolar iron transporter family protein | (RefSeq) uncharacterized protein LOC116019235 (A)
IFM89_039423	K12795 suppressor of G2 allele of SKP1 | (RefSeq) protein SGT1 homolog B-like (A)
IFM89_015213	K02133 F-type H+-transporting ATPase subunit beta [EC:7.1.2.2] | (RefSeq) ATP synthase subunit beta, mitochondrial (A)
IFM89_028287	K01193 beta-fructofuranosidase [EC:3.2.1.26] | (RefSeq) beta-fructofuranosidase, insoluble isoenzyme 1-like (A)
IFM89_015168	K17361 acyl-coenzyme A thioesterase 9 [EC:3.1.2.-] | (RefSeq) acyl-coenzyme A thioesterase 9, mitochondrial-like (A)
IFM89_028388	K00737 beta-1,4-mannosyl-glycoprotein beta-1,4-N-acetylglucosaminyltransferase [EC:2.4.1.144] | (RefSeq) beta-1,4-mannosyl-glycoprotein 4-beta-N-acetylglucosaminyltransferase (A)
IFM89_012651	K00850 6-phosphofructokinase 1 [EC:2.7.1.11] | (RefSeq) ATP-dependent 6-phosphofructokinase 6-like (A)
IFM89_010986	K13789 geranylgeranyl diphosphate synthase, type II [EC:2.5.1.1 2.5.1.10 2.5.1.29] | (RefSeq) geranylgeranyl pyrophosphate synthase, chloroplastic-like (A)
IFM89_015985	K09458 3-oxoacyl-[acyl-carrier-protein] synthase II [EC:2.3.1.179] | (RefSeq) 3-oxoacyl-[acyl-carrier-protein] synthase I, chloroplastic-like isoform X1 (A)
novel.8178	K00208 enoyl-[acyl-carrier protein] reductase I [EC:1.3.1.9 1.3.1.10] | (RefSeq) enoyl-[acyl-carrier-protein] reductase [NADH], chloroplastic (A)
IFM89_003174	K04079 molecular chaperone HtpG | (RefSeq) F-box/kelch-repeat protein At3g06240-like isoform X1 (A)
novel.8208	K04035 magnesium-protoporphyrin IX monomethyl ester (oxidative) cyclase [EC:1.14.13.81] | (RefSeq) at103; magnesium-protoporphyrin IX monomethyl ester [oxidative] cyclase, chloroplastic (A)
IFM89_020942	K02206 cyclin-dependent kinase 2 [EC:2.7.11.22] | (RefSeq) cell division control protein 2 homolog (A)
IFM89_035977	K19891 glucan endo-1,3-beta-glucosidase 1/2/3 [EC:3.2.1.39] | (RefSeq) glucan endo-1,3-beta-glucosidase 3-like (A)
novel.6376	K03063 26S proteasome regulatory subunit T3 | (RefSeq) 26S proteasome regulatory subunit 6B homolog (A)
IFM89_021190	K00002 alcohol dehydrogenase (NADP+) [EC:1.1.1.2] | (RefSeq) NADPH-dependent aldo-keto reductase, chloroplastic-like isoform X1 (A)
IFM89_032149	K20718 LRR receptor-like serine/threonine-protein kinase ERECTA [EC:2.7.11.1] | (RefSeq) LRR receptor-like serine/threonine-protein kinase ERL2 isoform X1 (A)
IFM89_012091	K16190 glucuronokinase [EC:2.7.1.43] | (RefSeq) glucuronokinase 1-like (A)
IFM89_004142	K12581 CCR4-NOT transcription complex subunit 7/8 | (RefSeq) probable CCR4-associated factor 1 homolog 9 (A)
IFM89_012423	K11254 histone H4 | (RefSeq) histone H4 (A)
IFM89_028293	K14494 DELLA protein | (RefSeq) DELLA protein GAI-like (A)
novel.8645	K07441 beta-1,4-N-acetylglucosaminyltransferase [EC:2.4.1.141] | (RefSeq) UDP-N-acetylglucosamine transferase subunit ALG14 homolog (A)
IFM89_016358	K01613 phosphatidylserine decarboxylase [EC:4.1.1.65] | (RefSeq) phosphatidylserine decarboxylase proenzyme 3-like (A)
IFM89_008180	K00799 glutathione S-transferase [EC:2.5.1.18] | (RefSeq) glutathione transferase GST 23-like (A)
IFM89_008429	K12837 splicing factor U2AF 65 kDa subunit | (RefSeq) splicing factor U2af large subunit B isoform X1 (A)
IFM89_013949	K22803 structural maintenance of chromosomes protein 5 | (RefSeq) structural maintenance of chromosomes protein 5 (A)
IFM89_016807	K01177 beta-amylase [EC:3.2.1.2] | (RefSeq) beta-amylase 3, chloroplastic-like (A)
novel.2683	K15078 structure-specific endonuclease subunit SLX1 [EC:3.6.1.-] | (RefSeq) putative disease resistance protein RGA3 (A)
IFM89_007626	K21776 protein lin-54 | (RefSeq) Lin-54-like protein (A)
IFM89_021502	K19892 glucan endo-1,3-beta-glucosidase 4 [EC:3.2.1.39] | (RefSeq) glucan endo-1,3-beta-glucosidase 4 (A)
IFM89_009765	K03542 photosystem II 22kDa protein | (RefSeq) photosystem II 22 kDa protein, chloroplastic-like (A)
novel.7211	K02469 DNA gyrase subunit A [EC:5.6.2.2] | (RefSeq) DNA gyrase subunit A, chloroplastic/mitochondrial-like (A)
IFM89_027954	K03231 elongation factor 1-alpha | (GenBank) elongation factor 1-alpha (A)
IFM89_027201	K04646 clathrin heavy chain | (RefSeq) clathrin heavy chain 1 (A)
IFM89_000992	K10523 speckle-type POZ protein | (RefSeq) BTB/POZ and MATH domain-containing protein 2 (A)
IFM89_038086	K14638 solute carrier family 15 (peptide/histidine transporter), member 3/4 | (RefSeq) protein NRT1/ PTR FAMILY 4.3-like (A)
IFM89_039755	K11422 [histone H3]-lysine4 N-trimethyltransferase SETD1 [EC:2.1.1.354] | (RefSeq) histone-lysine N-methyltransferase, H3 lysine-4 specific-like (A)
IFM89_018252	K01681 aconitate hydratase [EC:4.2.1.3] | (RefSeq) aconitate hydratase, cytoplasmic isoform X1 (A)
IFM89_031383	K08235 xyloglucan:xyloglucosyl transferase [EC:2.4.1.207] | (RefSeq) probable xyloglucan endotransglucosylase/hydrolase protein 8 (A)
IFM89_029886	K03522 electron transfer flavoprotein alpha subunit | (RefSeq) electron transfer flavoprotein subunit alpha, mitochondrial (A)
IFM89_021901	K13947 auxin efflux carrier family protein | (RefSeq) probable auxin efflux carrier component 1b (A)
IFM89_027609	K13789 geranylgeranyl diphosphate synthase, type II [EC:2.5.1.1 2.5.1.10 2.5.1.29] | (RefSeq) heterodimeric geranylgeranyl pyrophosphate synthase small subunit, chloroplastic (A)
IFM89_011586	K23408 cell division cycle-associated protein 7 | (RefSeq) hypothetical protein (A)
IFM89_029029	K02148 V-type H+-transporting ATPase subunit C | (RefSeq) V-type proton ATPase subunit C (A)
IFM89_013484	K17609 nucleoredoxin [EC:1.8.1.8] | (RefSeq) hypothetical protein (A)
IFM89_003960	K01490 AMP deaminase [EC:3.5.4.6] | (RefSeq) AMP deaminase-like isoform X1 (A)
IFM89_022039	K03100 signal peptidase I [EC:3.4.21.89] | (RefSeq) uncharacterized protein LOC18104955 (A)
novel.7021	K12882 nuclear cap-binding protein subunit 1 | (RefSeq) nuclear cap-binding protein subunit 1-like (A)
IFM89_005974	K00850 6-phosphofructokinase 1 [EC:2.7.1.11] | (RefSeq) ATP-dependent 6-phosphofructokinase 6-like (A)
IFM89_017664	K10610 DNA damage-binding protein 1 | (RefSeq) DNA damage-binding protein 1 (A)
IFM89_031742	K12883 nuclear cap-binding protein subunit 2 | (RefSeq) nuclear cap-binding protein subunit 2-like (A)
IFM89_033380	K10664 E3 ubiquitin-protein ligase ATL6/9/15/31/42/55 [EC:2.3.2.27] | (RefSeq) RING-H2 finger protein ATL57-like (A)
novel.6971	K00236 succinate dehydrogenase (ubiquinone) cytochrome b560 subunit | (RefSeq) sdh3, EI154_mgp10; Succinate dehydrogenase 3 (A)
IFM89_018778	K15449 tRNA wybutosine-synthesizing protein 1 [EC:4.1.3.44] | (RefSeq) probable methyltransferase PMT28 (A)
IFM89_036912	K08235 xyloglucan:xyloglucosyl transferase [EC:2.4.1.207] | (RefSeq) xyloglucan endotransglucosylase/hydrolase 1 (A)
IFM89_024983	K21437 ankyrin repeat domain-containing protein 13 | (RefSeq) ankyrin repeat domain-containing protein 13B-like (A)
IFM89_004502	K03327 multidrug resistance protein, MATE family | (RefSeq) protein DETOXIFICATION 21-like (A)
IFM89_020625	K00108 choline dehydrogenase [EC:1.1.99.1] | (RefSeq) protein HOTHEAD (A)
IFM89_020843	K01051 pectinesterase [EC:3.1.1.11] | (RefSeq) pectinesterase-like (A)
IFM89_013402	K09838 zeaxanthin epoxidase [EC:1.14.15.21] | (RefSeq) zeaxanthin epoxidase, chloroplastic (A)
IFM89_012801	K12501 homogentisate solanesyltransferase [EC:2.5.1.117] | (RefSeq) hypothetical protein (A)
IFM89_031254	K15102 solute carrier family 25 (mitochondrial phosphate transporter), member 3 | (RefSeq) mitochondrial phosphate carrier protein 3, mitochondrial-like (A)
IFM89_032728	K10999 cellulose synthase A [EC:2.4.1.12] | (RefSeq) cellulose synthase A catalytic subunit 4 [UDP-forming] isoform X1 (A)
IFM89_021813	K14641 apyrase [EC:3.6.1.5] | (RefSeq) probable apyrase 1 (A)
IFM89_020966	K15919 glyoxylate/hydroxypyruvate reductase [EC:1.1.1.79 1.1.1.81] | (RefSeq) hypothetical protein (A)
IFM89_012988	K13415 protein brassinosteroid insensitive 1 [EC:2.7.10.1 2.7.11.1] | (RefSeq) protein BRASSINOSTEROID INSENSITIVE 1-like (A)
novel.8384	K14494 DELLA protein | (RefSeq) DELLA protein GAI (A)
IFM89_001175	K08770 ubiquitin C | (RefSeq) polyubiquitin 12-like isoform X1 (A)
IFM89_037646	K18801 glucuronoxylan 4-O-methyltransferase [EC:2.1.1.112] | (RefSeq) glucuronoxylan 4-O-methyltransferase 1 (A)
IFM89_028026	K05909 laccase [EC:1.10.3.2] | (RefSeq) laccase-4-like (A)
IFM89_002927	no KO assigned | (RefSeq) probable protein S-acyltransferase 7 (A)
IFM89_034648	K17065 dynamin 1-like protein [EC:3.6.5.5] | (RefSeq) dynamin-related protein 3A-like (A)
IFM89_028491	no KO assigned | (RefSeq) probable S-adenosyl-L-methionine-dependent RNA methyltransferase RSM22, mitochondrial (A)
IFM89_001148	K15377 solute carrier family 44 (choline transporter-like protein), member 2/4/5 | (RefSeq) uncharacterized protein (A)
IFM89_016035	K00858 NAD+ kinase [EC:2.7.1.23] | (RefSeq) probable NAD kinase 1 (A)
IFM89_018022	K05894 12-oxophytodienoic acid reductase [EC:1.3.1.42] | (RefSeq) putative 12-oxophytodienoate reductase 11 (A)
IFM89_001196	K14811 ATP-dependent RNA helicase DBP3 [EC:3.6.4.13] | (RefSeq) DEAD-box ATP-dependent RNA helicase 5 (A)
IFM89_001465	K16818 phospholipase A1 [EC:3.1.1.32] | (RefSeq) phospholipase A(1) DAD1, chloroplastic (A)
IFM89_027881	K10398 kinesin family member 11 | (RefSeq) kinesin-like protein KIN-5D (A)
IFM89_035544	K12930 anthocyanidin 3-O-glucosyltransferase [EC:2.4.1.115] | (RefSeq) anthocyanidin 3-O-glucosyltransferase 2-like (A)
IFM89_023378	K10859 DNA oxidative demethylase [EC:1.14.11.33] | (RefSeq) alpha-ketoglutarate-dependent dioxygenase alkB homolog 3-like (A)
IFM89_011843	K02966 small subunit ribosomal protein S19e | (RefSeq) 40S ribosomal protein S19 (A)
IFM89_026429	K06268 serine/threonine-protein phosphatase 2B regulatory subunit | (RefSeq) calcineurin B-like protein 4 (A)
IFM89_033960	K14611 solute carrier family 23 (nucleobase transporter), member 1 | (RefSeq) nucleobase-ascorbate transporter 11-like (A)
novel.8201	K03029 26S proteasome regulatory subunit N10 | (RefSeq) 26S proteasome non-ATPase regulatory subunit 4 homolog (A)
IFM89_020477	K00924 kinase [EC:2.7.1.-] | (RefSeq) hypothetical protein (A)
IFM89_010549	K03115 casein kinase II subunit beta | (RefSeq) casein kinase II subunit beta-1-like (A)
IFM89_000799	K14638 solute carrier family 15 (peptide/histidine transporter), member 3/4 | (RefSeq) protein NRT1/ PTR FAMILY 5.9-like (A)
IFM89_026965	K15078 structure-specific endonuclease subunit SLX1 [EC:3.6.1.-] | (RefSeq) putative disease resistance protein RGA3 (A)
IFM89_004219	K14484 auxin-responsive protein IAA | (RefSeq) auxin-induced protein AUX22 (A)
IFM89_037355	K00967 ethanolamine-phosphate cytidylyltransferase [EC:2.7.7.14] | (RefSeq) ethanolamine-phosphate cytidylyltransferase-like (A)
IFM89_025851	K02434 aspartyl-tRNA(Asn)/glutamyl-tRNA(Gln) amidotransferase subunit B [EC:6.3.5.6 6.3.5.7] | (RefSeq) glutamyl-tRNA(Gln) amidotransferase subunit B, chloroplastic/mitochondrial-like (A)
IFM89_020644	K01733 threonine synthase [EC:4.2.3.1] | (RefSeq) threonine synthase 1, chloroplastic-like (A)
IFM89_018115	K13457 disease resistance protein RPM1 | (RefSeq) disease resistance protein RPM1 (A)
IFM89_003856	K23333 E3 ubiquitin-protein transferase RMND5 [EC:2.3.2.27] | (RefSeq) protein RMD5 homolog A (A)
IFM89_031482	K15401 long-chain fatty acid omega-monooxygenase [EC:1.14.14.80] | (RefSeq) cytochrome P450 86A1 (A)
IFM89_011863	K04122 ent-kaurene oxidase [EC:1.14.14.86] | (RefSeq) ent-kaurene oxidase, chloroplastic (A)
IFM89_034065	K05658 ATP-binding cassette, subfamily B (MDR/TAP), member 1 [EC:7.6.2.2] | (RefSeq) ABC transporter B family member 13-like isoform X1 (A)
IFM89_037522	K16224 senescence-induced receptor-like serine/threonine-protein kinase | (RefSeq) FRK1; FLG22-induced receptor-like kinase 1 (A)
IFM89_011711	K00521 ferric-chelate reductase [EC:1.16.1.7] | (RefSeq) ferric reduction oxidase 7, chloroplastic-like (A)
novel.3107	K01490 AMP deaminase [EC:3.5.4.6] | (RefSeq) AMP deaminase-like (A)
IFM89_028643	K01613 phosphatidylserine decarboxylase [EC:4.1.1.65] | (RefSeq) phosphatidylserine decarboxylase proenzyme 3-like (A)
IFM89_038777	K15283 solute carrier family 35, member E1 | (RefSeq) phosphoenolpyruvate/phosphate translocator 1, chloroplastic-like (A)
IFM89_014042	K09527 DnaJ homolog subfamily C member 7 | (RefSeq) inactive TPR repeat-containing thioredoxin TTL3-like (A)
IFM89_004718	K13425 WRKY transcription factor 22 | (GenBank) WRKY family transcription factor (A)
IFM89_016688	K10401 kinesin family member 18/19 | (RefSeq) kinesin-like protein KIN-8A (A)
IFM89_030917	K15891 NAD+-dependent farnesol dehydrogenase [EC:1.1.1.354] | (RefSeq) putative dihydroflavonol 4-reductase (A)
IFM89_007647	K03696 ATP-dependent Clp protease ATP-binding subunit ClpC | (RefSeq) ATP-dependent Clp protease ATP-binding subunit ClpA homolog CD4B, chloroplastic-like (A)
IFM89_008577	K15631 molybdenum cofactor sulfurtransferase [EC:2.8.1.9] | (RefSeq) molybdenum cofactor sulfurase-like (A)
IFM89_031074	K20892 beta-arabinofuranosyltransferase [EC:2.4.2.-] | (RefSeq) uncharacterized LOC100259633 (A)
IFM89_029148	K02377 GDP-L-fucose synthase [EC:1.1.1.271] | (RefSeq) GDP-L-fucose synthase 1-like (A)
IFM89_024078	K00010 myo-inositol 2-dehydrogenase / D-chiro-inositol 1-dehydrogenase [EC:1.1.1.18 1.1.1.369] | (RefSeq) myo-inositol 2-dehydrogenase (A)
IFM89_036405	K13397 (S)-scoulerine 9-O-methyltransferase [EC:2.1.1.117] | (RefSeq) (S)-scoulerine 9-O-methyltransferase-like (A)
IFM89_020225	K23877 xyloglucan O-acetyltransferase | (RefSeq) protein ALTERED XYLOGLUCAN 4-like (A)
IFM89_017814	K00164 2-oxoglutarate dehydrogenase E1 component [EC:1.2.4.2] | (RefSeq) 2-oxoglutarate dehydrogenase, mitochondrial (A)
IFM89_010707	K02433 aspartyl-tRNA(Asn)/glutamyl-tRNA(Gln) amidotransferase subunit A [EC:6.3.5.6 6.3.5.7] | (RefSeq) Glutamyl-tRNA(Gln) amidotransferase subunit A (A)
IFM89_001503	K08269 serine/threonine-protein kinase ULK2 [EC:2.7.11.1] | (RefSeq) serine/threonine-protein kinase ATG1c (A)
IFM89_031256	K15102 solute carrier family 25 (mitochondrial phosphate transporter), member 3 | (RefSeq) mitochondrial phosphate carrier protein 3, mitochondrial (A)
IFM89_009805	K17873 11-oxo-beta-amyrin 30-oxidase [EC:1.14.14.115] | (RefSeq) 11-oxo-beta-amyrin 30-oxidase (A)
IFM89_012204	K00430 peroxidase [EC:1.11.1.7] | (RefSeq) peroxidase 73-like isoform X1 (A)
IFM89_030919	K08287 dual-specificity kinase [EC:2.7.12.1] | (RefSeq) serine/threonine-protein kinase AFC2-like (A)
IFM89_014457	K04733 interleukin-1 receptor-associated kinase 4 [EC:2.7.11.1] | (RefSeq) G-type lectin S-receptor-like serine/threonine-protein kinase RKS1 (A)
IFM89_020441	K04708 3-dehydrosphinganine reductase [EC:1.1.1.102] | (RefSeq) 3-dehydrosphinganine reductase TSC10A-like (A)
IFM89_009757	K05681 ATP-binding cassette, subfamily G (WHITE), member 2 | (RefSeq) ABC transporter, ATP-binding protein isoform 1 (A)
IFM89_018629	K13379 reversibly glycosylated polypeptide / UDP-arabinopyranose mutase [EC:2.4.1.- 5.4.99.30] | (RefSeq) probable UDP-arabinopyranose mutase 2 (A)
IFM89_005553	K01262 Xaa-Pro aminopeptidase [EC:3.4.11.9] | (RefSeq) aminopeptidase P1 isoform X1 (A)
IFM89_003374	K14207 solute carrier family 38 (sodium-coupled neutral amino acid transporter), member 2 | (RefSeq) sodium-coupled neutral amino acid transporter 2 (A)
IFM89_024656	K16281 RING-H2 zinc finger protein RHA1 | (RefSeq) E3 ubiquitin-protein ligase RHA1B-like (A)
IFM89_021283	K16818 phospholipase A1 [EC:3.1.1.32] | (RefSeq) phospholipase A(1) DAD1, chloroplastic (A)
IFM89_028650	K12373 hexosaminidase [EC:3.2.1.52] | (RefSeq) beta-hexosaminidase 3 (A)
IFM89_032590	K16297 serine carboxypeptidase-like clade II [EC:3.4.16.-] | (RefSeq) serine carboxypeptidase II-3-like (A)
IFM89_024277	K00924 kinase [EC:2.7.1.-] | (RefSeq) hypothetical protein (A)
IFM89_038621	K07200 5'-AMP-activated protein kinase, regulatory gamma subunit | (RefSeq) hypothetical protein (A)
IFM89_034006	K09487 heat shock protein 90kDa beta | (RefSeq) endoplasmin homolog isoform X1 (A)
IFM89_012865	K03178 ubiquitin-activating enzyme E1 [EC:6.2.1.45] | (RefSeq) ubiquitin-activating enzyme E1 2-like isoform X1 (A)
IFM89_011591	K14491 two-component response regulator ARR-B family | (RefSeq) two-component response regulator ARR1 isoform X1 (A)
IFM89_011855	K11547 kinetochore protein NDC80 | (RefSeq) kinetochore protein NDC80 homolog (A)
IFM89_013340	K03020 DNA-directed RNA polymerases I and III subunit RPAC2 | (RefSeq) DNA-directed RNA polymerases I and III subunit RPAC2 (A)
IFM89_024752	K10143 E3 ubiquitin-protein ligase RFWD2 [EC:2.3.2.27] | (RefSeq) E3 ubiquitin-protein ligase COP1-like (A)
IFM89_022082	K09753 cinnamoyl-CoA reductase [EC:1.2.1.44] | (RefSeq) cinnamoyl-CoA reductase 1-like (A)
novel.5260	K01528 dynamin 1/3 [EC:3.6.5.5] | (Kazusa) Lj0g3v0199559.2; - (A)
IFM89_030081	K15382 solute carrier family 50 (sugar transporter) | (RefSeq) bidirectional sugar transporter SWEET17-like (A)
IFM89_031625	K06119 sulfoquinovosyltransferase [EC:2.4.1.-] | (RefSeq) sulfoquinovosyl transferase SQD2-like (A)
IFM89_032804	K10730 ATP-dependent DNA helicase Q4 [EC:5.6.2.4] | (RefSeq) ATP-dependent DNA helicase Q-like 5 (A)
IFM89_019248	K14398 cleavage and polyadenylation specificity factor subunit 6/7 | (RefSeq) cleavage and polyadenylation specificity factor subunit 6-like (A)
IFM89_004025	K22395 cinnamyl-alcohol dehydrogenase [EC:1.1.1.195] | (RefSeq) berberine bridge enzyme-like 15 (A)
IFM89_000289	K00939 adenylate kinase [EC:2.7.4.3] | (RefSeq) adenylate kinase 4 isoform X1 (A)
IFM89_002589	K01054 acylglycerol lipase [EC:3.1.1.23] | (RefSeq) caffeoylshikimate esterase-like (A)
IFM89_012109	K02894 large subunit ribosomal protein L23e | (RAP-DB) Os02g0814700; Similar to Ribosomal Pr 117 (Fragment). (A)
IFM89_013106	K08235 xyloglucan:xyloglucosyl transferase [EC:2.4.1.207] | (RefSeq) probable xyloglucan endotransglucosylase/hydrolase protein B (A)
IFM89_018976	K00850 6-phosphofructokinase 1 [EC:2.7.1.11] | (RefSeq) ATP-dependent 6-phosphofructokinase 6-like (A)
IFM89_037540	K10859 DNA oxidative demethylase [EC:1.14.11.33] | (RefSeq) alpha-ketoglutarate-dependent dioxygenase alkB homolog 3-like (A)
IFM89_007597	K18159 NADH dehydrogenase [ubiquinone] 1 alpha subcomplex assembly factor 1 | (RefSeq) hypothetical protein (A)
IFM89_021342	K14440 SWI/SNF-related matrix-associated actin-dependent regulator of chromatin subfamily A-like protein 1 [EC:5.6.2.-] | (RefSeq) SWI/SNF-related matrix-associated actin-dependent regulator of chromatin subfamily A-like protein 1 isoform X1 (A)
IFM89_020034	K08332 vacuolar protein 8 | (RefSeq) U-box domain-containing protein 4 (A)
IFM89_031820	K03327 multidrug resistance protein, MATE family | (RefSeq) protein DETOXIFICATION 33-like (A)
IFM89_030584	K24028 salicylic acid 3-hydroxylase [EC:1.14.11.-] | (RefSeq) flavanone 3-dioxygenase 2-like isoform X1 (A)
novel.7426	K20553 5'-3' exoribonuclease 4 [EC:3.1.13.-] | (RefSeq) LOW QUALITY PROTEIN: 5'-3' exoribonuclease 3 (A)
IFM89_028101	K22772 flavonol-3-O-glucoside L-rhamnosyltransferase [EC:2.4.1.159] | (RefSeq) anthocyanidin 3-O-glucosyltransferase-like (A)
IFM89_009485	K00218 protochlorophyllide reductase [EC:1.3.1.33] | (RefSeq) protochlorophyllide reductase, chloroplastic (A)
IFM89_031223	K14485 transport inhibitor response 1 | (RefSeq) TIR1; F-box/RNI-like superfamily protein (A)
IFM89_029808	K15272 solute carrier family 35 (UDP-sugar transporter), member A1/2/3 | (RefSeq) CMP-sialic acid transporter 1 (A)
IFM89_022883	K15111 solute carrier family 25 (mitochondrial S-adenosylmethionine transporter), member 26 | (RefSeq) probable mitochondrial carrier proteins; Pet8p (A)
IFM89_016825	K09874 aquaporin NIP | (RefSeq) aquaporin NIP1-1-like (A)
novel.6687	K14440 SWI/SNF-related matrix-associated actin-dependent regulator of chromatin subfamily A-like protein 1 [EC:5.6.2.-] | (RefSeq) SWI/SNF-related matrix-associated actin-dependent regulator of chromatin subfamily A-like protein 1 isoform X1 (A)
novel.7359	K12879 THO complex subunit 2 | (RefSeq) THO complex subunit 2 (A)
IFM89_034888	K01495 GTP cyclohydrolase IA [EC:3.5.4.16] | (RefSeq) GTP cyclohydrolase 1-like (A)
IFM89_035402	K14826 FK506-binding nuclear protein [EC:5.2.1.8] | (RefSeq) peptidyl-prolyl cis-trans isomerase FKBP53-like (A)
IFM89_037838	K13429 chitin elicitor receptor kinase 1 | (RefSeq) lysM domain receptor-like kinase 3 (A)
IFM89_015051	K25108 licheninase [EC:3.2.1.73] | (RefSeq) glucan endo-1,3-beta-glucosidase-like (A)
IFM89_007860	K23947 2-oxoglutarate-dependent dioxygenase [EC:1.14.11.-] | (RefSeq) 2-oxoglutarate-dependent dioxygenase DAO (A)
novel.8252	K12598 ATP-dependent RNA helicase DOB1 [EC:3.6.4.13] | (RefSeq) DExH-box ATP-dependent RNA helicase DExH10-like (A)
IFM89_038786	K01184 polygalacturonase [EC:3.2.1.15] | (RefSeq) polygalacturonase At1g48100 (A)
IFM89_000860	K03128 transcription initiation factor TFIID subunit 2 | (RefSeq) transcription initiation factor TFIID subunit 2 (A)
IFM89_024370	K13336 peroxin-3 | (RefSeq) peroxisome biogenesis protein 3-2-like (A)
novel.6081	K14400 pre-mRNA cleavage complex 2 protein Pcf11 | (RefSeq) polyadenylation and cleavage factor homolog 4-like (A)
IFM89_023781	K09487 heat shock protein 90kDa beta | (RefSeq) endoplasmin homolog (A)
IFM89_006713	K15503 serine/threonine-protein phosphatase 6 regulatory ankyrin repeat subunit B | (RefSeq) uncharacterized protein LOC110720991 (A)
IFM89_025998	K13415 protein brassinosteroid insensitive 1 [EC:2.7.10.1 2.7.11.1] | (RefSeq) protein BRASSINOSTEROID INSENSITIVE 1-like (A)
IFM89_017855	K02433 aspartyl-tRNA(Asn)/glutamyl-tRNA(Gln) amidotransferase subunit A [EC:6.3.5.6 6.3.5.7] | (RefSeq) glutamyl tRNA amidotransferase, subunit A (A)
IFM89_006049	K14509 ethylene receptor [EC:2.7.13.-] | (RefSeq) protein EIN4-like (A)
IFM89_033486	K17491 protein phosphatase 4 regulatory subunit 3 | (RefSeq) serine/threonine-protein phosphatase 4 regulatory subunit 3-like (A)
IFM89_029651	K01179 endoglucanase [EC:3.2.1.4] | (RefSeq) endoglucanase 12-like (A)
IFM89_035571	K13832 3-dehydroquinate dehydratase / shikimate dehydrogenase [EC:4.2.1.10 1.1.1.25] | (RefSeq) bifunctional 3-dehydroquinate dehydratase/shikimate dehydrogenase, chloroplastic-like isoform X1 (A)
IFM89_006281	K03885 NADH:quinone reductase (non-electrogenic) [EC:1.6.5.9] | (RefSeq) internal alternative NAD(P)H-ubiquinone oxidoreductase A2, mitochondrial (A)
IFM89_004861	K23947 2-oxoglutarate-dependent dioxygenase [EC:1.14.11.-] | (RefSeq) 2-oxoglutarate-dependent dioxygenase DAO (A)
IFM89_006643	K00432 glutathione peroxidase [EC:1.11.1.9] | (RefSeq) LOW QUALITY PROTEIN: probable phospholipid hydroperoxide glutathione peroxidase (A)
novel.6998	K09338 homeobox-leucine zipper protein | (RefSeq) homeobox-leucine zipper protein GLABRA 2-like (A)
IFM89_033725	K12890 serine/arginine-rich splicing factor 1 | (RefSeq) serine/arginine-rich-splicing factor SR34-like (A)
IFM89_019460	K20884 riboflavin kinase / FMN hydrolase [EC:2.7.1.26 3.1.3.102] | (RefSeq) bifunctional riboflavin kinase/FMN phosphatase-like (A)
IFM89_023995	K05907 adenylyl-sulfate reductase (glutathione) [EC:1.8.4.9] | (RefSeq) 5'-adenylylsulfate reductase 1, chloroplastic-like (A)
IFM89_002075	K01213 galacturan 1,4-alpha-galacturonidase [EC:3.2.1.67] | (RefSeq) exopolygalacturonase-like (A)
IFM89_020928	K12608 CCR4-NOT complex subunit CAF16 | (RefSeq) ABC transporter I family member 20 (A)
IFM89_021545	K01180 endo-1,3(4)-beta-glucanase [EC:3.2.1.6] | (RefSeq) uncharacterized protein LOC111487562 (A)
IFM89_011911	K23136 fraxetin 5-hydroxylase [EC:1.14.14.164] | (RefSeq) cytochrome P450 CYP82D47-like (A)
IFM89_020512	K03686 molecular chaperone DnaJ | (RefSeq) chaperone protein dnaJ GFA2, mitochondrial-like (A)
IFM89_005591	K22066 BolA-like protein 1 | (RefSeq) sufE-like protein 1, chloroplastic/mitochondrial (A)
IFM89_029217	K15923 alpha-L-fucosidase 2 [EC:3.2.1.51] | (RefSeq) alpha-L-fucosidase 2-like (A)
IFM89_039361	K00430 peroxidase [EC:1.11.1.7] | (RefSeq) peroxidase 12-like (A)
IFM89_021809	K24917 amino acid permease | (RefSeq) Amino acid permease 2 (A)
IFM89_036243	K22683 aspartyl protease family protein [EC:3.4.23.-] | (RefSeq) hypothetical protein (A)
IFM89_011848	K01900 succinyl-CoA synthetase beta subunit [EC:6.2.1.4 6.2.1.5] | (RefSeq) succinate--CoA ligase [ADP-forming] subunit beta, mitochondrial-like (A)
IFM89_020631	K01641 hydroxymethylglutaryl-CoA synthase [EC:2.3.3.10] | (RefSeq) hydroxymethylglutaryl-CoA synthase-like (A)
IFM89_038117	K01895 acetyl-CoA synthetase [EC:6.2.1.1] | (RefSeq) acs2; acetyl-coa synthetase (A)
IFM89_018902	K15333 tRNA guanosine-2'-O-methyltransferase [EC:2.1.1.34] | (RefSeq) uncharacterized protein LOC104224633 (A)
IFM89_030186	K19355 mannan endo-1,4-beta-mannosidase [EC:3.2.1.78] | (RefSeq) mannan endo-1,4-beta-mannosidase 2-like (A)
IFM89_002595	K02870 large subunit ribosomal protein L12e | (RefSeq) 60S ribosomal protein L12 (A)
IFM89_015680	K09273 upstream-binding transcription factor | (RefSeq) high mobility group B protein 6-like (A)
IFM89_039739	K10704 ubiquitin-conjugating enzyme E2 variant | (RefSeq) ubiquitin-conjugating enzyme E2 variant 1A-like (A)
novel.6770	K20457 dihydrofolate synthase [EC:6.3.2.12] | (RefSeq) dihydrofolate synthetase isoform X1 (A)
IFM89_001118	K03139 transcription initiation factor TFIIF subunit beta [EC:5.6.2.-] | (RefSeq) transcription initiation factor IIF subunit beta-like (A)
IFM89_023439	K02146 V-type H+-transporting ATPase subunit d | (RefSeq) V-type proton ATPase subunit d1 (A)
IFM89_000683	K10661 E3 ubiquitin-protein ligase MARCH6 [EC:2.3.2.27] | (RefSeq) probable E3 ubiquitin ligase SUD1 (A)
IFM89_017904	K06911 quercetin 2,3-dioxygenase [EC:1.13.11.24] | (RefSeq) pirin-like protein (A)
IFM89_033890	K04733 interleukin-1 receptor-associated kinase 4 [EC:2.7.11.1] | (RefSeq) G-type lectin S-receptor-like serine/threonine-protein kinase RKS1 (A)
IFM89_019022	K19791 iron transport multicopper oxidase | (RefSeq) L-ascorbate oxidase homolog (A)
IFM89_037633	K01179 endoglucanase [EC:3.2.1.4] | (RefSeq) endoglucanase 23-like (A)
IFM89_032841	K01845 glutamate-1-semialdehyde 2,1-aminomutase [EC:5.4.3.8] | (RefSeq) Glutamate-1-semialdehyde 2,1-aminomutase, chloroplastic (A)
IFM89_037650	K17500 integrin-linked kinase-associated serine/threonine phosphatase 2C [EC:3.1.3.16] | (RefSeq) WAT1-related protein At3g18200-like (A)
IFM89_002545	K04733 interleukin-1 receptor-associated kinase 4 [EC:2.7.11.1] | (RefSeq) probable receptor-like protein kinase At5g18500 (A)
IFM89_034822	K20855 beta-1,3-galactosyltransferase 1/2/3/4/5/7/8 [EC:2.4.1.-] | (RefSeq) probable beta-1,3-galactosyltransferase 2 (A)
IFM89_003932	K15030 translation initiation factor 3 subunit M | (RefSeq) uncharacterized protein LOC106431989 (A)
IFM89_026277	K09377 cysteine and glycine-rich protein | (RefSeq) LIM domain-containing protein WLIM1-like (A)
IFM89_002822	K01206 alpha-L-fucosidase [EC:3.2.1.51] | (RefSeq) alpha-L-fucosidase 3-like (A)
novel.2655	K03676 glutaredoxin 3 | (RefSeq) glutaredoxin-C6-like (A)
IFM89_007768	K14486 auxin response factor | (RefSeq) auxin response factor 16 isoform X1 (A)
IFM89_016225	K08150 MFS transporter, SP family, solute carrier family 2 (myo-inositol transporter), member 13 | (RefSeq) LOW QUALITY PROTEIN: inositol transporter 1 (A)
IFM89_029878	K06269 serine/threonine-protein phosphatase PP1 catalytic subunit [EC:3.1.3.16] | (RefSeq) serine/threonine-protein phosphatase PP1 (A)
IFM89_032359	K13382 (S)-norcoclaurine synthase [EC:4.2.1.78] | (RefSeq) uncharacterized protein LOC113340282 (A)
novel.4595	K10704 ubiquitin-conjugating enzyme E2 variant | (RefSeq) uncharacterized protein LOC100192908 (A)
IFM89_036015	K09338 homeobox-leucine zipper protein | (RefSeq) homeobox-leucine zipper protein HAT5-like (A)
IFM89_011232	K03019 DNA-directed RNA polymerase III subunit RPC11 | (RefSeq) DNA-directed RNA polymerase III subunit RPC10-like (A)
IFM89_027898	K11254 histone H4 | (RefSeq) histone H4 (A)
IFM89_036911	K13447 respiratory burst oxidase [EC:1.6.3.- 1.11.1.-] | (RefSeq) respiratory burst oxidase homolog protein C (A)
IFM89_009799	K22683 aspartyl protease family protein [EC:3.4.23.-] | (RefSeq) protein ASPARTIC PROTEASE IN GUARD CELL 1-like (A)
IFM89_031723	K08679 UDP-glucuronate 4-epimerase [EC:5.1.3.6] | (RefSeq) UDP-glucuronate 4-epimerase 3-like (A)
IFM89_014956	K12881 THO complex subunit 4 | (RefSeq) THO complex subunit 4D-like (A)
IFM89_038584	K00827 alanine-glyoxylate transaminase / (R)-3-amino-2-methylpropionate-pyruvate transaminase [EC:2.6.1.44 2.6.1.40] | (RefSeq) alanine--glyoxylate aminotransferase 2 homolog 3, mitochondrial (A)
IFM89_006302	K20890 xylan alpha-glucuronosyltransferase [EC:2.4.1.-] | (RefSeq) putative UDP-glucuronate:xylan alpha-glucuronosyltransferase 4 (A)
IFM89_024139	K08343 ubiquitin-like-conjugating enzyme ATG3 | (RefSeq) autophagy-related protein 3 (A)
IFM89_008093	K13692 UDP-glucose:(indol-3-yl)acetate beta-D-glucosyltransferase [EC:2.4.1.121] | (RefSeq) UDP-glycosyltransferase 84B1 (A)
IFM89_013745	K05759 profilin | (RefSeq) uncharacterized protein LOC103842625 isoform X1 (A)
IFM89_013139	K13195 cold-inducible RNA-binding protein | (RefSeq) glycine-rich RNA-binding protein GRP2A (A)
IFM89_018934	K02921 large subunit ribosomal protein L37Ae | (RefSeq) 60S ribosomal protein L37a-1-like (A)
IFM89_028245	K03097 casein kinase II subunit alpha [EC:2.7.11.1] | (RefSeq) casein kinase II subunit alpha-2-like (A)
IFM89_028470	K00430 peroxidase [EC:1.11.1.7] | (RefSeq) peroxidase P7-like (A)
novel.8015	K02901 large subunit ribosomal protein L27e | (RefSeq) 60S ribosomal protein L27-3 (A)
novel.8791	K01623 fructose-bisphosphate aldolase, class I [EC:4.1.2.13] | (RefSeq) fructose-bisphosphate aldolase, cytoplasmic isozyme 1 (A)
IFM89_002445	K14005 protein transport protein SEC31 | (RefSeq) protein transport protein SEC31 homolog B-like isoform X1 (A)
IFM89_029891	K22733 magnesium transporter | (RefSeq) uncharacterized protein LOC102612526 (A)
IFM89_031824	K12394 AP-1 complex subunit sigma 1/2 | (RefSeq) AP-1 complex subunit sigma-1 (A)
IFM89_038383	K20495 long-chain fatty acid omega-monooxygenase [EC:1.14.14.80] | (RefSeq) cytochrome P450 704B1 (A)
IFM89_039184	K03935 NADH dehydrogenase (ubiquinone) Fe-S protein 2 [EC:7.1.1.2] | (RefSeq) NADH dehydrogenase [ubiquinone] iron-sulfur protein 2-like (A)
IFM89_039083	K12446 L-arabinokinase [EC:2.7.1.46] | (RefSeq) L-arabinokinase-like (A)
IFM89_006732	K14842 ribosome biogenesis protein NSA2 | (RefSeq) uncharacterized protein LOC115994472 (A)
IFM89_005444	K15363 fanconi-associated nuclease 1 [EC:3.1.21.- 3.1.4.1] | (RefSeq) hypothetical protein (A)
novel.2930	K02985 small subunit ribosomal protein S3e | (RefSeq) 40S ribosomal protein S3-1-like (A)
IFM89_002066	K01689 enolase [EC:4.2.1.11] | (RefSeq) enolase 1-like (A)
IFM89_008513	K13430 serine/threonine-protein kinase PBS1 [EC:2.7.11.1] | (RefSeq) serine/threonine-protein kinase PBS1-like isoform X1 (A)
IFM89_000889	K16224 senescence-induced receptor-like serine/threonine-protein kinase | (RefSeq) senescence-induced receptor-like serine/threonine-protein kinase (A)
IFM89_027071	K00850 6-phosphofructokinase 1 [EC:2.7.1.11] | (RefSeq) ATP-dependent 6-phosphofructokinase 6-like (A)
IFM89_039413	K12133 MYB-related transcription factor LHY | (RefSeq) protein LHY-like (A)
IFM89_018832	K23541 Ca2+/H+ antiporter, TMEM165/GDT1 family | (RefSeq) LOW QUALITY PROTEIN: uncharacterized protein LOC105051209 (A)
novel.5790	K12115 clock-associated PAS protein ZTL | (RefSeq) adagio protein 1-like (A)
IFM89_007357	K10400 kinesin family member 15 | (RefSeq) kinesin-like protein KIN-12E (A)
IFM89_020405	K20347 p24 family protein beta-1 | (RefSeq) transmembrane emp24 domain-containing protein p24beta2-like (A)
IFM89_031714	K00615 transketolase [EC:2.2.1.1] | (RefSeq) transketolase, chloroplastic (A)
novel.1889	K22378 E3 ubiquitin-protein ligase RNF181 [EC:2.3.2.27] | (RefSeq) E3 ubiquitin-protein ligase RDUF1 (A)
IFM89_004266	K20784 arabinosyltransferase [EC:2.4.2.-] | (RefSeq) arabinosyltransferase XEG113 (A)
IFM89_029460	K03254 translation initiation factor 3 subunit A | (RefSeq) eukaryotic translation initiation factor 3 subunit A-like (A)
IFM89_031919	K20890 xylan alpha-glucuronosyltransferase [EC:2.4.1.-] | (RefSeq) UDP-glucuronate:xylan alpha-glucuronosyltransferase 2 isoform X2 (A)
IFM89_006463	K15813 beta-amyrin synthase [EC:5.4.99.39] | (RefSeq) beta-amyrin synthase (A)
novel.5063	K14175 (3S,6E)-nerolidol synthase [EC:4.2.3.48] | (RefSeq) (3S,6E)-nerolidol synthase 1-like (A)
IFM89_022345	K04421 mitogen-activated protein kinase kinase kinase 3 [EC:2.7.11.25] | (RefSeq) mitogen-activated protein kinase kinase kinase YODA (A)
IFM89_017095	K01285 lysosomal Pro-X carboxypeptidase [EC:3.4.16.2] | (RefSeq) lysosomal Pro-X carboxypeptidase-like (A)
IFM89_010412	K00033 6-phosphogluconate dehydrogenase [EC:1.1.1.44 1.1.1.343] | (RefSeq) 6-phosphogluconate dehydrogenase, decarboxylating 2 (A)
IFM89_010605	K10728 topoisomerase (DNA) II binding protein 1 | (RefSeq) BRCT domain-containing protein At4g02110 (A)
IFM89_000847	K14664 IAA-amino acid hydrolase [EC:3.5.1.-] | (RefSeq) IAA-amino acid hydrolase ILR1-like 1 (A)
novel.3286	K03006 DNA-directed RNA polymerase II subunit RPB1 [EC:2.7.7.6] | (RefSeq) LOW QUALITY PROTEIN: DNA-directed RNA polymerase II subunit 1-like (A)
IFM89_012799	K22683 aspartyl protease family protein [EC:3.4.23.-] | (RefSeq) aspartyl protease family protein 2-like (A)
IFM89_028678	K04460 serine/threonine-protein phosphatase 5 [EC:3.1.3.16] | (RefSeq) serine/threonine-protein phosphatase 5-like isoform X1 (A)
IFM89_006308	K08234 glyoxylase I family protein | (RefSeq) methylmalonyl-CoA epimerase, mitochondrial (A)
IFM89_020099	K11254 histone H4 | (RefSeq) histone H4 (A)
novel.8156	K02178 checkpoint serine/threonine-protein kinase [EC:2.7.11.1] | (RefSeq) mitotic spindle checkpoint protein BUBR1 (A)
IFM89_016189	K09422 transcription factor MYB, plant | (RefSeq) transcription factor MYB46-like (A)
IFM89_007008	K03283 heat shock 70kDa protein 1/2/6/8 | (RefSeq) heat shock 70 kDa protein-like (A)
IFM89_027538	K07198 5'-AMP-activated protein kinase, catalytic alpha subunit [EC:2.7.11.11] | (RefSeq) SNF1-related protein kinase catalytic subunit alpha KIN10 isoform X1 (A)
IFM89_021003	K01184 polygalacturonase [EC:3.2.1.15] | (RefSeq) polygalacturonase QRT2-like (A)
novel.4077	K12309 beta-galactosidase [EC:3.2.1.23] | (RefSeq) beta-galactosidase 2 (A)
IFM89_036566	K21630 GATA-type zinc finger protein 1 | (RefSeq) GATA transcription factor 6-like (A)
IFM89_015790	K22706 (R)-mandelonitrile beta-glucosyltransferase [EC:2.4.1.354] | (RefSeq) 7-deoxyloganetin glucosyltransferase (A)
IFM89_029938	K14611 solute carrier family 23 (nucleobase transporter), member 1 | (RefSeq) nucleobase-ascorbate transporter 11-like (A)
IFM89_018520	K09422 transcription factor MYB, plant | (RefSeq) transcription factor LAF1-like (A)
IFM89_011429	K09264 MADS-box transcription factor, plant | (RefSeq) truncated transcription factor CAULIFLOWER A-like (A)
IFM89_025956	K12309 beta-galactosidase [EC:3.2.1.23] | (RefSeq) LOW QUALITY PROTEIN: beta-galactosidase 2 (A)
IFM89_020433	K20363 protein YIPF5/7 | (RefSeq) uncharacterized protein LOC114296056 isoform X1 (A)
IFM89_004632	K07052 CAAX protease family protein | (RefSeq) uncharacterized protein LOC110772687 (A)
novel.5633	K14493 gibberellin receptor GID1 [EC:3.-.-.-] | (RefSeq) GID1b-1; hypothetical protein (A)
IFM89_007698	K15601 [histone H3]-dimethyl-L-lysine9 demethylase [EC:1.14.11.65] | (RefSeq) lysine-specific demethylase JMJ25-like (A)
IFM89_003676	K08819 cyclin-dependent kinase 12/13 [EC:2.7.11.22 2.7.11.23] | (RefSeq) cyclin-dependent kinase C-2-like isoform X1 (A)
IFM89_012298	K15104 solute carrier family 25 (mitochondrial oxoglutarate transporter), member 11 | (RefSeq) mitochondrial dicarboxylate/tricarboxylate transporter DTC-like (A)
IFM89_017030	K20168 TBC1 domain family member 15 | (RefSeq) TBC1 domain family member 15-like (A)
IFM89_026988	K05391 cyclic nucleotide gated channel, plant | (RefSeq) cyclic nucleotide-gated ion channel 1-like (A)
IFM89_017820	K03798 cell division protease FtsH [EC:3.4.24.-] | (RefSeq) P-loop containing nucleoside triphosphate hydrolase (A)
IFM89_006668	K08360 transmembrane ascorbate-dependent reductase [EC:7.2.1.3] | (RefSeq) uncharacterized protein LOC105129652 isoform X1 (A)
IFM89_014913	K13513 lysocardiolipin and lysophospholipid acyltransferase [EC:2.3.1.- 2.3.1.51] | (RefSeq) probable 1-acyl-sn-glycerol-3-phosphate acyltransferase 4 isoform X1 (A)
IFM89_037140	K14664 IAA-amino acid hydrolase [EC:3.5.1.-] | (RefSeq) IAA-amino acid hydrolase ILR1-like 3 isoform X1 (A)
IFM89_038030	K14455 aspartate aminotransferase, mitochondrial [EC:2.6.1.1] | (RefSeq) aspartate aminotransferase, mitochondrial-like (A)
IFM89_037017	K12524 bifunctional aspartokinase / homoserine dehydrogenase 1 [EC:2.7.2.4 1.1.1.3] | (RefSeq) bifunctional aspartokinase/homoserine dehydrogenase 1, chloroplastic-like (A)
IFM89_004715	K22698 protein SEY1 [EC:3.6.5.-] | (RefSeq) protein ROOT HAIR DEFECTIVE 3 homolog 2-like (A)
IFM89_012729	K13435 serine/threonine-protein kinase Pto | (RefSeq) Pto; serine/threonine protein kinase Pto (A)
IFM89_032902	K22376 E3 ubiquitin-protein ligase KCMF1 [EC:2.3.2.27] | (RefSeq) protein DEHYDRATION-INDUCED 19 homolog 4-like (A)
IFM89_030849	K01179 endoglucanase [EC:3.2.1.4] | (RefSeq) endoglucanase 6 (A)
IFM89_021711	K15042 importin subunit alpha-6/7 | (RefSeq) uncharacterized LOC105761158 (A)
IFM89_029855	K20721 reticulon-1 | (RefSeq) reticulon-like protein B1 (A)
novel.387	K15255 ATP-dependent DNA helicase PIF1 [EC:5.6.2.3] | (RefSeq) ATP-dependent DNA helicase PIF1-like (A)
IFM89_000898	K09287 RAV-like factor | (RefSeq) AP2/ERF and B3 domain-containing transcription factor RAV1-like (A)
IFM89_020443	K03542 photosystem II 22kDa protein | (RefSeq) photosystem II 22 kDa protein, chloroplastic (A)
IFM89_035462	K00889 1-phosphatidylinositol-4-phosphate 5-kinase [EC:2.7.1.68] | (RefSeq) phosphatidylinositol 4-phosphate 5-kinase 6-like (A)
IFM89_024654	K14780 ATP-dependent RNA helicase DHX37/DHR1 [EC:3.6.4.13] | (RefSeq) ATP-dependent RNA helicase DEAH13-like isoform X1 (A)
IFM89_012507	K03797 carboxyl-terminal processing protease [EC:3.4.21.102] | (RefSeq) carboxyl-terminal-processing peptidase 2, chloroplastic (A)
IFM89_039353	K10882 crossover junction endonuclease EME1 [EC:3.1.22.-] | (RefSeq) crossover junction endonuclease EME1B (A)
IFM89_017646	K00827 alanine-glyoxylate transaminase / (R)-3-amino-2-methylpropionate-pyruvate transaminase [EC:2.6.1.44 2.6.1.40] | (RefSeq) alanine--glyoxylate aminotransferase 2 homolog 1, mitochondrial isoform X1 (A)
IFM89_017986	K08176 MFS transporter, PHS family, inorganic phosphate transporter | (RefSeq) inorganic phosphate transporter 1-4 (A)
IFM89_036400	K22048 mechanosensitive ion channel protein 4/5/6/7/8/9/10 | (RefSeq) mechanosensitive ion channel protein 10 (A)
IFM89_007356	K14494 DELLA protein | (RefSeq) DELLA protein GAI-like (A)
IFM89_013290	K01593 aromatic-L-amino-acid/L-tryptophan decarboxylase [EC:4.1.1.28 4.1.1.105] | (GenBank) tyrosine/DOPA decarboxylase (A)
IFM89_025162	K23136 fraxetin 5-hydroxylase [EC:1.14.14.164] | (RefSeq) cytochrome P450 CYP82D47-like (A)
IFM89_035237	K05759 profilin | (RefSeq) uncharacterized protein LOC103842625 isoform X1 (A)
IFM89_015293	K21362 galactolipid galactosyltransferase [EC:2.4.1.184] | (RefSeq) beta-glucosidase-like SFR2, chloroplastic isoform X1 (A)
novel.5660	K03327 multidrug resistance protein, MATE family | (RefSeq) protein DETOXIFICATION 34-like (A)
IFM89_032791	K09753 cinnamoyl-CoA reductase [EC:1.2.1.44] | (RefSeq) cinnamoyl-CoA reductase 1 (A)
IFM89_015249	K13415 protein brassinosteroid insensitive 1 [EC:2.7.10.1 2.7.11.1] | (RefSeq) systemin receptor SR160 (A)
IFM89_030286	K07374 tubulin alpha | (RefSeq) tubulin alpha-4 chain-like (A)
IFM89_036455	K13457 disease resistance protein RPM1 | (RefSeq) disease resistance protein RPM1 isoform X3 (A)
IFM89_022312	K17500 integrin-linked kinase-associated serine/threonine phosphatase 2C [EC:3.1.3.16] | (RefSeq) WAT1-related protein At3g18200-like (A)
novel.8458	K13418 somatic embryogenesis receptor kinase 1 [EC:2.7.10.1 2.7.11.1] | (RefSeq) somatic embryogenesis receptor kinase 2 (A)
IFM89_033920	K00162 pyruvate dehydrogenase E1 component beta subunit [EC:1.2.4.1] | (RefSeq) pyruvate dehydrogenase E1 component subunit beta-1, mitochondrial (A)
IFM89_001111	K00966 mannose-1-phosphate guanylyltransferase [EC:2.7.7.13] | (RefSeq) mannose-1-phosphate guanylyltransferase 1 (A)
IFM89_021019	K04079 molecular chaperone HtpG | (RefSeq) F-box/kelch-repeat protein At3g06240-like isoform X1 (A)
IFM89_038633	K12124 GIGANTEA | (RefSeq) protein GIGANTEA-like (A)
IFM89_015248	K00873 pyruvate kinase [EC:2.7.1.40] | (RefSeq) pyruvate kinase 1, cytosolic (A)
IFM89_000691	K06901 adenine/guanine/hypoxanthine permease | (RefSeq) adenine/guanine permease AZG1-like (A)
IFM89_004744	K15407 queuine tRNA-ribosyltransferase accessory subunit | (RefSeq) hypothetical protein (A)
IFM89_019735	K12309 beta-galactosidase [EC:3.2.1.23] | (RefSeq) beta-galactosidase 2 (A)
IFM89_002940	K10666 E3 ubiquitin-protein ligase RNF5 [EC:2.3.2.27] | (RefSeq) E3 ubiquitin-protein ligase RMA1H1-like (A)
IFM89_039754	K10268 F-box and leucine-rich repeat protein 2/20 | (RefSeq) F-box/LRR-repeat protein 14 (A)
IFM89_003146	K23947 2-oxoglutarate-dependent dioxygenase [EC:1.14.11.-] | (RefSeq) 2-oxoglutarate-dependent dioxygenase DAO (A)
IFM89_015593	K23095 demethylphylloquinol methyltransferase [EC:2.1.1.329] | (RefSeq) 2-phytyl-1,4-beta-naphthoquinone methyltransferase, chloroplastic (A)
novel.8588	K10752 histone-binding protein RBBP4 | (RefSeq) LOW QUALITY PROTEIN: WD-40 repeat-containing protein MSI3 (A)
IFM89_031571	K15333 tRNA guanosine-2'-O-methyltransferase [EC:2.1.1.34] | (RefSeq) uncharacterized protein LOC104224633 (A)
IFM89_002144	K08912 light-harvesting complex II chlorophyll a/b binding protein 1 | (RefSeq) chlorophyll a-b binding protein of LHCII type 1-like (A)
IFM89_031573	K04733 interleukin-1 receptor-associated kinase 4 [EC:2.7.11.1] | (RefSeq) proline-rich receptor-like protein kinase PERK12 (A)
IFM89_003983	K10257 acyl-lipid omega-3 desaturase [EC:1.14.19.25 1.14.19.35 1.14.19.36] | (RefSeq) omega-3 fatty acid desaturase, endoplasmic reticulum-like (A)
IFM89_032191	K14611 solute carrier family 23 (nucleobase transporter), member 1 | (RefSeq) nucleobase-ascorbate transporter 6 (A)
IFM89_021553	K01534 Zn2+/Cd2+-exporting ATPase [EC:7.2.2.12 7.2.2.21] | (RefSeq) cadmium/zinc-transporting ATPase HMA3-like (A)
IFM89_001737	K13993 HSP20 family protein | (RAP-DB) Os02g0758000; Similar to Low molecular weight heat shock protein precursor (Mitochondrial small heat shock protein 22). (A)
IFM89_021682	K14709 solute carrier family 39 (zinc transporter), member 1/2/3 | (RefSeq) zinc transporter 4, chloroplastic (A)
IFM89_004406	K03327 multidrug resistance protein, MATE family | (RefSeq) protein DETOXIFICATION 34-like (A)
IFM89_028535	K15078 structure-specific endonuclease subunit SLX1 [EC:3.6.1.-] | (RefSeq) putative disease resistance protein RGA3 (A)
IFM89_029625	K01897 long-chain acyl-CoA synthetase [EC:6.2.1.3] | (RefSeq) long chain acyl-CoA synthetase 4-like (A)
IFM89_021097	K17302 coatomer subunit beta' | (RefSeq) probable serine/threonine-protein kinase PkwA isoform X1 (A)
IFM89_039482	K06072 deoxyhypusine monooxygenase [EC:1.14.99.29] | (RefSeq) deoxyhypusine hydroxylase-B-like (A)
IFM89_035764	K15015 solute carrier family 32 (vesicular inhibitory amino acid transporter) | (RefSeq) uncharacterized protein LOC107609646 isoform X1 (A)
IFM89_033110	K13415 protein brassinosteroid insensitive 1 [EC:2.7.10.1 2.7.11.1] | (RefSeq) systemin receptor SR160-like (A)
IFM89_024428	K00940 nucleoside-diphosphate kinase [EC:2.7.4.6] | (RefSeq) nucleoside diphosphate kinase 3-like (A)
IFM89_017997	K13413 mitogen-activated protein kinase kinase 4/5 [EC:2.7.12.2] | (RefSeq) mitogen-activated protein kinase kinase 5-like (A)
IFM89_037792	K12951 cobalt/nickel-transporting P-type ATPase D [EC:7.2.2.-] | (RefSeq) hypothetical protein (A)
IFM89_011300	K10532 heparan-alpha-glucosaminide N-acetyltransferase [EC:2.3.1.78] | (RefSeq) uncharacterized protein LOC117856584 (A)
IFM89_026721	K01464 dihydropyrimidinase [EC:3.5.2.2] | (RefSeq) dihydropyrimidinase (A)
IFM89_002613	K08332 vacuolar protein 8 | (RefSeq) U-box domain-containing protein 4-like (A)
IFM89_016919	K01736 chorismate synthase [EC:4.2.3.5] | (RefSeq) chorismate synthase 1, chloroplastic (A)
IFM89_001779	K10755 replication factor C subunit 2/4 | (RefSeq) replication factor C subunit 2 (A)
IFM89_019826	K22382 WD repeat-containing protein 26 | (RefSeq) WD repeat-containing protein 26 homolog (A)
IFM89_021223	K22377 E3 ubiquitin-protein ligase listerin [EC:2.3.2.27] | (RefSeq) E3 ubiquitin-protein ligase listerin (A)
IFM89_014087	K13436 pto-interacting protein 1 [EC:2.7.11.1] | (RefSeq) pto-interacting protein 1 isoform X1 (A)
IFM89_014953	K01179 endoglucanase [EC:3.2.1.4] | (RefSeq) endoglucanase 8-like (A)
IFM89_006665	K07375 tubulin beta | (RefSeq) tubulin beta-1 chain-like (A)
IFM89_016612	K11593 eukaryotic translation initiation factor 2C | (RefSeq) protein argonaute 4A-like (A)
IFM89_005720	K07375 tubulin beta | (RefSeq) tubulin beta chain-like (A)
IFM89_004137	K10704 ubiquitin-conjugating enzyme E2 variant | (RefSeq) ubiquitin-conjugating enzyme E2 variant 1D-like (A)
IFM89_017253	K23260 scopoletin glucosyltransferase [EC:2.4.1.128] | (RefSeq) scopoletin glucosyltransferase-like (A)
IFM89_002021	K05350 beta-glucosidase [EC:3.2.1.21] | (RefSeq) beta-glucosidase 18-like (A)
IFM89_017530	K10686 NEDD8-activating enzyme E1 [EC:6.2.1.64] | (RefSeq) NEDD8-activating enzyme E1 catalytic subunit (A)
IFM89_031474	K05909 laccase [EC:1.10.3.2] | (RefSeq) laccase-11 (A)
IFM89_003837	K09579 peptidyl-prolyl cis-trans isomerase NIMA-interacting 4 [EC:5.2.1.8] | (RefSeq) peptidyl-prolyl cis-trans isomerase NIMA-interacting 4-like (A)
IFM89_039625	K10755 replication factor C subunit 2/4 | (RefSeq) replication factor C subunit 2 (A)
IFM89_014662	K20362 protein transport protein YIF1 | (RefSeq) protein YIF1B-like (A)
novel.258	K03030 26S proteasome regulatory subunit N11 | (RefSeq) 26S proteasome non-ATPase regulatory subunit 14 homolog (A)
IFM89_033532	K08867 WNK lysine deficient protein kinase [EC:2.7.11.1] | (RefSeq) probable serine/threonine-protein kinase WNK4 (A)
IFM89_024985	K00660 chalcone synthase [EC:2.3.1.74] | (RefSeq) chalcone synthase 1-like (A)
IFM89_014739	K22522 cytokinin riboside 5'-monophosphate phosphoribohydrolase [EC:3.2.2.-] | (RefSeq) cytokinin riboside 5'-monophosphate phosphoribohydrolase LOG1-like isoform X1 (A)
IFM89_010848	K17725 sulfur dioxygenase [EC:1.13.11.18] | (RefSeq) persulfide dioxygenase ETHE1 homolog, mitochondrial-like (A)
IFM89_011721	K20285 Rab9 effector protein with kelch motifs | (RefSeq) hypothetical protein (A)
IFM89_023373	K03327 multidrug resistance protein, MATE family | (RefSeq) LOW QUALITY PROTEIN: protein DETOXIFICATION 18-like (A)
IFM89_022837	K01255 leucyl aminopeptidase [EC:3.4.11.1] | (RefSeq) leucyl aminopeptidase (A)
IFM89_036516	K15333 tRNA guanosine-2'-O-methyltransferase [EC:2.1.1.34] | (RefSeq) uncharacterized protein LOC104224633 (A)
IFM89_032303	K19891 glucan endo-1,3-beta-glucosidase 1/2/3 [EC:3.2.1.39] | (RefSeq) glucan endo-1,3-beta-glucosidase 1 (A)
IFM89_017320	K06617 raffinose synthase [EC:2.4.1.82] | (RefSeq) probable galactinol--sucrose galactosyltransferase 2 (A)
IFM89_006126	K13258 2-hydroxyisoflavanone dehydratase [EC:4.2.1.105] | (RefSeq) uncharacterized protein LOC113871120 (A)
IFM89_006686	K00549 5-methyltetrahydropteroyltriglutamate--homocysteine methyltransferase [EC:2.1.1.14] | (RefSeq) 5-methyltetrahydropteroyltriglutamate-- homocysteine methyltransferase (A)
IFM89_013248	K21596 calmodulin-binding transcription activator | (RefSeq) uncharacterized LOC107794376 (A)
IFM89_023908	K03953 NADH dehydrogenase (ubiquinone) 1 alpha subcomplex subunit 9 | (RefSeq) NADH dehydrogenase [ubiquinone] 1 alpha subcomplex subunit 9, mitochondrial (A)
IFM89_017629	K20367 endoplasmic reticulum-Golgi intermediate compartment protein 3 | (RefSeq) endoplasmic reticulum-Golgi intermediate compartment protein 3 (A)
IFM89_039664	K01051 pectinesterase [EC:3.1.1.11] | (RefSeq) uncharacterized protein LOC110634634 (A)
IFM89_013754	K21776 protein lin-54 | (RefSeq) uncharacterized LOC104592360 (A)
IFM89_006798	K14975 codeine 3-O-demethylase [EC:1.14.11.32] | (RefSeq) codeine O-demethylase (A)
IFM89_024077	K07178 RIO kinase 1 [EC:2.7.11.1] | (RefSeq) serine/threonine-protein kinase rio1-like isoform X1 (A)
IFM89_020314	K20098 DNA excision repair protein ERCC-6-like 2 [EC:5.6.2.-] | (GenBank) DNA repair and recombination RAD26-like protein, putative (A)
IFM89_023042	K07059 uncharacterized protein | (RefSeq) predicted protein (A)
IFM89_020292	K03231 elongation factor 1-alpha | (RefSeq) elongation factor 1-alpha (A)
IFM89_020962	K15919 glyoxylate/hydroxypyruvate reductase [EC:1.1.1.79 1.1.1.81] | (RefSeq) hypothetical protein (A)
IFM89_038536	K21776 protein lin-54 | (RefSeq) Lin-54-like protein (A)
IFM89_002530	K13667 EGF-domain serine glucosyl/xylosyltransferase [EC:2.4.1.376 2.4.2.63] | (RefSeq) O-glucosyltransferase rumi (A)
IFM89_020951	K05277 anthocyanidin synthase [EC:1.14.20.4] | (RefSeq) leucoanthocyanidin dioxygenase-like (A)
IFM89_019936	K14784 protein CMS1 | (RefSeq) protein CMSS1 (A)
IFM89_037045	K20102 YTH domain-containing family protein | (RefSeq) YTH domain-containing protein ECT4 isoform X1 (A)
IFM89_025243	K00679 phospholipid:diacylglycerol acyltransferase [EC:2.3.1.158] | (RefSeq) hypothetical protein (A)
novel.5207	K02257 heme o synthase [EC:2.5.1.141] | (RefSeq) protoheme IX farnesyltransferase, mitochondrial (A)
IFM89_030984	K17756 long-chain-alcohol oxidase [EC:1.1.3.20] | (RefSeq) long-chain-alcohol oxidase FAO2-like (A)
IFM89_026171	K17098 annexin D | (RefSeq) annexin-like protein RJ4 (A)
IFM89_021578	K00895 diphosphate-dependent phosphofructokinase [EC:2.7.1.90] | (RefSeq) pyrophosphate--fructose 6-phosphate 1-phosphotransferase subunit alpha-like (A)
IFM89_028743	K02694 photosystem I subunit III | (RefSeq) photosystem I reaction center subunit III, chloroplastic-like (A)
IFM89_031314	K00703 starch synthase [EC:2.4.1.21] | (RefSeq) granule-bound starch synthase 2, chloroplastic/amyloplastic (A)
IFM89_032935	K10752 histone-binding protein RBBP4 | (RefSeq) LOW QUALITY PROTEIN: WD-40 repeat-containing protein MSI3 (A)
IFM89_032697	K07936 GTP-binding nuclear protein Ran | (GenBank) GTP-binding nuclear Ran-like protein (A)
IFM89_024091	K01535 H+-transporting ATPase [EC:7.1.2.1] | (RefSeq) plasma membrane ATPase 1 isoform X1 (A)
IFM89_032000	K01087 trehalose 6-phosphate phosphatase [EC:3.1.3.12] | (RefSeq) probable trehalose-phosphate phosphatase F (A)
IFM89_021183	K13264 isoflavone 7-O-glucoside-6''-O-malonyltransferase [EC:2.3.1.115] | (RefSeq) phenolic glucoside malonyltransferase 1-like (A)
IFM89_001661	K03327 multidrug resistance protein, MATE family | (RefSeq) protein DETOXIFICATION 34-like (A)
IFM89_020486	K15397 3-ketoacyl-CoA synthase [EC:2.3.1.199] | (RefSeq) 3-ketoacyl-CoA synthase 6 (A)
IFM89_034824	K10872 meiotic recombination protein DMC1 | (RefSeq) meiotic recombination protein DMC1 homolog (A)
IFM89_023125	K09510 DnaJ homolog subfamily B member 4 | (RefSeq) dnaJ homolog subfamily B member 4-like (A)
IFM89_029839	K11649 SWI/SNF-related matrix-associated actin-dependent regulator of chromatin subfamily C | (GenBank) F-box and associated interaction domain protein (A)
IFM89_002856	K02214 cell division control protein 7 [EC:2.7.11.1] | (RefSeq) uncharacterized LOC104587975 (A)
IFM89_018387	K00600 glycine hydroxymethyltransferase [EC:2.1.2.1] | (RefSeq) serine hydroxymethyltransferase 2, mitochondrial (A)
IFM89_000610	K01087 trehalose 6-phosphate phosphatase [EC:3.1.3.12] | (RefSeq) probable trehalose-phosphate phosphatase 5 (A)
IFM89_008820	K10575 ubiquitin-conjugating enzyme E2 G1 [EC:2.3.2.23] | (RefSeq) ubiquitin-conjugating enzyme E2 7 (A)
IFM89_019815	K04078 chaperonin GroES | (RefSeq) CPN21; 20 kDa chaperonin, chloroplastic (A)
IFM89_031306	K15015 solute carrier family 32 (vesicular inhibitory amino acid transporter) | (RefSeq) amino acid transporter AVT1I-like (A)
IFM89_027964	K19891 glucan endo-1,3-beta-glucosidase 1/2/3 [EC:3.2.1.39] | (RefSeq) glucan endo-1,3-beta-glucosidase 3-like (A)
IFM89_023004	K01800 maleylacetoacetate isomerase [EC:5.2.1.2] | (RefSeq) glutathione S-transferase 2-like (A)
IFM89_019656	K00679 phospholipid:diacylglycerol acyltransferase [EC:2.3.1.158] | (RefSeq) hypothetical protein (A)
IFM89_028086	K04802 proliferating cell nuclear antigen | (RefSeq) proliferating cell nuclear antigen (A)
IFM89_017240	K11253 histone H3 | (RefSeq) histone H3.2-like (A)
IFM89_012324	K02735 20S proteasome subunit beta 3 [EC:3.4.25.1] | (RefSeq) proteasome subunit beta type-3 (A)
IFM89_015778	K22382 WD repeat-containing protein 26 | (RefSeq) WD repeat-containing protein 26 homolog (A)
IFM89_019412	K22706 (R)-mandelonitrile beta-glucosyltransferase [EC:2.4.1.354] | (RefSeq) 7-deoxyloganetin glucosyltransferase (A)
IFM89_028725	K03538 ribonuclease P protein subunit POP4 [EC:3.1.26.5] | (RefSeq) ribonuclease P protein subunit p29-like isoform X1 (A)
IFM89_033482	K08737 DNA mismatch repair protein MSH6 | (RefSeq) DNA mismatch repair protein MSH6 (A)
IFM89_024129	K10664 E3 ubiquitin-protein ligase ATL6/9/15/31/42/55 [EC:2.3.2.27] | (RefSeq) RING-H2 finger protein ATL57-like (A)
IFM89_017109	K17616 CTD small phosphatase-like protein 2 [EC:3.1.3.-] | (RefSeq) CTD small phosphatase-like protein 2 isoform X1 (A)
IFM89_028102	K03327 multidrug resistance protein, MATE family | (RefSeq) protein DETOXIFICATION 41-like (A)
IFM89_015942	K20890 xylan alpha-glucuronosyltransferase [EC:2.4.1.-] | (RefSeq) putative UDP-glucuronate:xylan alpha-glucuronosyltransferase 4 (A)
IFM89_008185	K08505 protein transport protein SFT1 | (RefSeq) bet1-like protein At4g14600 (A)
IFM89_039124	K09285 AP2-like factor, ANT lineage | (RefSeq) AP2-like ethylene-responsive transcription factor At1g16060 isoform X1 (A)
IFM89_031467	K13508 glycerol-3-phosphate acyltransferase [EC:2.3.1.15 2.3.1.198] | (RefSeq) glycerol-3-phosphate 2-O-acyltransferase 6-like (A)
novel.5728	K09338 homeobox-leucine zipper protein | (RefSeq) homeobox-leucine zipper protein PROTODERMAL FACTOR 2-like (A)
IFM89_017967	K10727 chromatin licensing and DNA replication factor 1 | (RefSeq) CDT1-like protein a, chloroplastic (A)
IFM89_033195	K03511 DNA polymerase kappa [EC:2.7.7.7] | (RefSeq) DNA polymerase kappa (A)
IFM89_007620	K15397 3-ketoacyl-CoA synthase [EC:2.3.1.199] | (RefSeq) 3-ketoacyl-CoA synthase 2-like (A)
IFM89_025623	K01886 glutaminyl-tRNA synthetase [EC:6.1.1.18] | (RefSeq) glutamine--tRNA ligase (A)
IFM89_008077	K02966 small subunit ribosomal protein S19e | (RefSeq) 40S ribosomal protein S19-1-like (A)
IFM89_034082	K21596 calmodulin-binding transcription activator | (RefSeq) calmodulin-binding transcription activator 3-like (A)
novel.6683	K03006 DNA-directed RNA polymerase II subunit RPB1 [EC:2.7.7.6] | (RefSeq) LOW QUALITY PROTEIN: DNA-directed RNA polymerase II subunit 1-like (A)
IFM89_035851	K00924 kinase [EC:2.7.1.-] | (RefSeq) hypothetical protein (A)
IFM89_028575	K07052 CAAX protease family protein | (RefSeq) uncharacterized LOC104600473 (A)
novel.8227	K21852 dedicator of cytokinesis protein 6/7/8 | (RefSeq) guanine nucleotide exchange factor SPIKE 1 (A)
IFM89_017730	K00430 peroxidase [EC:1.11.1.7] | (RefSeq) peroxidase A2-like (A)
IFM89_026244	K03017 DNA-directed RNA polymerase II subunit RPB9 | (RefSeq) DNA-directed RNA polymerases II, IV and V subunit 9A (A)
IFM89_013323	K05909 laccase [EC:1.10.3.2] | (RefSeq) laccase-7-like (A)
IFM89_029024	K19041 E3 ubiquitin-protein ligase RNF38/44 [EC:2.3.2.27] | (RefSeq) E3 ubiquitin-protein ligase MBR2 (A)
novel.6054	K08247 methionine S-methyltransferase [EC:2.1.1.12] | (RefSeq) methionine S-methyltransferase (A)
IFM89_002298	K17290 oxidoreductase [EC:1.1.1.-] | (RefSeq) Oxidoreductase HTATIP2 (A)
IFM89_008919	K13459 disease resistance protein RPS2 | (RefSeq) probable disease resistance protein At4g27220 (A)
IFM89_005236	K01190 beta-galactosidase [EC:3.2.1.23] | (RefSeq) beta-galactosidase (A)
IFM89_030973	K23872 putative homogalacturonan methyltransferase [EC:2.1.1.-] | (RefSeq) hypothetical protein (A)
IFM89_030000	K05759 profilin | (Kazusa) Lj2g3v0891240.1; - (A)
IFM89_029294	K17279 receptor expression-enhancing protein 5/6 | (RefSeq) HVA22-like protein e (A)
IFM89_012614	K21692 methyltetrahydroprotoberberine 14-monooxygenase [EC:1.14.14.97] | (RefSeq) methyltetrahydroprotoberberine 14-monooxygenase (A)
IFM89_024853	K10999 cellulose synthase A [EC:2.4.1.12] | (RefSeq) cellulose synthase A catalytic subunit 9 [UDP-forming] (A)
IFM89_020611	K09510 DnaJ homolog subfamily B member 4 | (RefSeq) dnaJ homolog subfamily B member 1 (A)
IFM89_012380	K18810 cyclin D1/2/4, plant | (RefSeq) cyclin-D3-1-like (A)
novel.7223	K09422 transcription factor MYB, plant | (RefSeq) transcription factor MYB51-like (A)
IFM89_029180	K01456 peptide-N4-(N-acetyl-beta-glucosaminyl)asparagine amidase [EC:3.5.1.52] | (RefSeq) peptide-N(4)-(N-acetyl-beta- glucosaminyl)asparagine amidase-like (A)
IFM89_027830	K14638 solute carrier family 15 (peptide/histidine transporter), member 3/4 | (RefSeq) protein NRT1/ PTR FAMILY 2.7-like (A)
IFM89_032666	K14963 COMPASS component SWD3 | (RefSeq) transcriptional corepressor LEUNIG isoform X2 (A)
IFM89_020515	K00083 cinnamyl-alcohol dehydrogenase [EC:1.1.1.195] | (RefSeq) probable mannitol dehydrogenase (A)
IFM89_003060	K09874 aquaporin NIP | (RefSeq) probable aquaporin NIP5-1 (A)
IFM89_015546	K02639 ferredoxin | (RefSeq) ferredoxin, root R-B2-like (A)
novel.4214	K03327 multidrug resistance protein, MATE family | (RefSeq) protein DETOXIFICATION 33 (A)
IFM89_011377	K03671 thioredoxin 1 | (RefSeq) thioredoxin 1-like (A)
IFM89_015148	K13430 serine/threonine-protein kinase PBS1 [EC:2.7.11.1] | (RefSeq) serine/threonine-protein kinase CDL1-like isoform X1 (A)
IFM89_019932	K01934 5-formyltetrahydrofolate cyclo-ligase [EC:6.3.3.2] | (RefSeq) 5-formyltetrahydrofolate cyclo-ligase, mitochondrial (A)
IFM89_005835	K23810 (E)-8-carboxylinalool synthase [EC:1.14.14.-] | (RefSeq) geraniol 8-hydroxylase-like (A)
IFM89_030041	K00249 acyl-CoA dehydrogenase [EC:1.3.8.7] | (RefSeq) probable acyl-CoA dehydrogenase IBR3 (A)
IFM89_011854	K15283 solute carrier family 35, member E1 | (RefSeq) glucose-6-phosphate/phosphate translocator 1, chloroplastic-like (A)
IFM89_005856	K05666 ATP-binding cassette, subfamily C (CFTR/MRP), member 2 | (RefSeq) ABC transporter C family member 3-like (A)
IFM89_034732	K18532 adenylate kinase [EC:2.7.4.3] | (RefSeq) adenylate kinase isoenzyme 6 homolog (A)
IFM89_028509	K06268 serine/threonine-protein phosphatase 2B regulatory subunit | (RefSeq) calcineurin B-like protein 7 (A)
IFM89_006935	K20718 LRR receptor-like serine/threonine-protein kinase ERECTA [EC:2.7.11.1] | (RefSeq) LRR receptor-like serine/threonine-protein kinase ERECTA (A)
IFM89_003022	K00924 kinase [EC:2.7.1.-] | (RefSeq) receptor protein kinase TMK1-like (A)
IFM89_006829	K13513 lysocardiolipin and lysophospholipid acyltransferase [EC:2.3.1.- 2.3.1.51] | (RefSeq) probable 1-acyl-sn-glycerol-3-phosphate acyltransferase 4 isoform X1 (A)
IFM89_026867	K10999 cellulose synthase A [EC:2.4.1.12] | (RefSeq) cellulose synthase A catalytic subunit 7 [UDP-forming]-like (A)
IFM89_027074	K04457 protein phosphatase 1A [EC:3.1.3.16] | (RefSeq) protein phosphatase 2C 57 (A)
IFM89_029664	K13422 transcription factor MYC2 | (RefSeq) transcription factor MYC3-like isoform X1 (A)
IFM89_022104	K09286 EREBP-like factor | (RefSeq) ethylene-responsive transcription factor ERN1 isoform X2 (A)
IFM89_015202	K01623 fructose-bisphosphate aldolase, class I [EC:4.1.2.13] | (RefSeq) fructose-bisphosphate aldolase 3, chloroplastic (A)
IFM89_031374	K03671 thioredoxin 1 | (RefSeq) thioredoxin F-type, chloroplastic-like (A)
IFM89_018917	K12845 U4/U6 small nuclear ribonucleoprotein SNU13 | (RefSeq) NHP2-like protein 1 (A)
IFM89_008547	K12118 cryptochrome 1 | (RefSeq) cryptochrome-1 isoform X1 (A)
IFM89_039169	K03885 NADH:quinone reductase (non-electrogenic) [EC:1.6.5.9] | (RefSeq) external alternative NAD(P)H-ubiquinone oxidoreductase B1, mitochondrial isoform X1 (A)
IFM89_008704	K11251 histone H2A | (RefSeq) histone H2A.6-like (A)
IFM89_001474	K15188 cyclin T | (RefSeq) cyclin-T1-5-like (A)
IFM89_019931	K09597 signal peptide peptidase-like 2B [EC:3.4.23.-] | (RefSeq) signal peptide peptidase-like 2 isoform X1 (A)
IFM89_028801	K00799 glutathione S-transferase [EC:2.5.1.18] | (RefSeq) glutathione S-transferase F10-like (A)
IFM89_038322	K17604 zinc finger SWIM domain-containing protein 3 | (RefSeq) protein FAR1-RELATED SEQUENCE 5-like (A)
IFM89_013932	K01142 exodeoxyribonuclease III [EC:3.1.11.2] | (RefSeq) DNA-(apurinic or apyrimidinic site) lyase, chloroplastic (A)
IFM89_000003	K09060 plant G-box-binding factor | (RefSeq) LOW QUALITY PROTEIN: transcription factor HBP-1a (A)
IFM89_032610	K24166 armadillo repeat-containing protein 6 | (RefSeq) armadillo repeat-containing protein 6-like (A)
novel.6244	K02575 MFS transporter, NNP family, nitrate/nitrite transporter | (RefSeq) high affinity nitrate transporter 2.5-like (A)
IFM89_016519	K23872 putative homogalacturonan methyltransferase [EC:2.1.1.-] | (RefSeq) probable pectin methyltransferase QUA3 (A)
IFM89_029288	K11001 phosphatidylinositol N-acetylglucosaminyltransferase subunit Y | (RefSeq) uncharacterized protein LOC122671020 (A)
IFM89_014975	K12823 ATP-dependent RNA helicase DDX5/DBP2 [EC:3.6.4.13] | (RefSeq) DEAD-box ATP-dependent RNA helicase 20 (A)
IFM89_018994	K00640 serine O-acetyltransferase [EC:2.3.1.30] | (RefSeq) serine acetyltransferase 2-like (A)
IFM89_037957	K13161 heterogeneous nuclear ribonucleoprotein R | (RefSeq) heterogeneous nuclear ribonucleoprotein Q-like (A)
novel.2583	K03103 multiple inositol-polyphosphate phosphatase / 2,3-bisphosphoglycerate 3-phosphatase [EC:3.1.3.62 3.1.3.80] | (RefSeq) multiple inositol polyphosphate phosphatase 1-like isoform X1 (A)
IFM89_025990	K02923 large subunit ribosomal protein L38e | (RefSeq) 60S ribosomal protein L38 isoform X1 (A)
IFM89_023907	K05666 ATP-binding cassette, subfamily C (CFTR/MRP), member 2 | (RefSeq) ABC transporter C family member 3-like (A)
IFM89_023134	K08869 aarF domain-containing kinase | (RefSeq) probable serine/threonine-protein kinase abkC (A)
IFM89_020218	K09422 transcription factor MYB, plant | (RefSeq) myb-related protein 308-like (A)
novel.7060	K09285 AP2-like factor, ANT lineage | (RefSeq) AP2-like ethylene-responsive transcription factor AIL5 (A)
IFM89_011638	K00766 anthranilate phosphoribosyltransferase [EC:2.4.2.18] | (RefSeq) anthranilate phosphoribosyltransferase, chloroplastic-like isoform X1 (A)
IFM89_019279	K20538 mitogen-activated protein kinase 8 [EC:2.7.11.24] | (RefSeq) hypothetical protein (A)
IFM89_000568	K00873 pyruvate kinase [EC:2.7.1.40] | (RefSeq) pyruvate kinase 1, cytosolic-like (A)
novel.7313	K03241 translation initiation factor eIF-2B subunit gamma | (RefSeq) uncharacterized protein LOC114319623 (A)
IFM89_019063	K09487 heat shock protein 90kDa beta | (RefSeq) endoplasmin homolog isoform X1 (A)
IFM89_031582	K00850 6-phosphofructokinase 1 [EC:2.7.1.11] | (RefSeq) ATP-dependent 6-phosphofructokinase 5, chloroplastic (A)
IFM89_021409	K02213 cell division control protein 6 | (RefSeq) cell division control protein 6 homolog B-like isoform X1 (A)
IFM89_030937	K24070 poly [ADP-ribose] polymerase 1 [EC:2.4.2.30] | (RefSeq) poly [ADP-ribose] polymerase 1-like isoform X1 (A)
IFM89_026192	K00830 alanine-glyoxylate transaminase / serine-glyoxylate transaminase / serine-pyruvate transaminase [EC:2.6.1.44 2.6.1.45 2.6.1.51] | (RefSeq) serine--glyoxylate aminotransferase (A)
IFM89_000696	K11593 eukaryotic translation initiation factor 2C | (RefSeq) protein argonaute 16-like (A)
IFM89_033261	K01188 beta-glucosidase [EC:3.2.1.21] | (RefSeq) beta-glucosidase 12 (A)
IFM89_020271	K17686 P-type Cu+ transporter [EC:7.2.2.8] | (RefSeq) probable copper-transporting ATPase HMA5 (A)
IFM89_025921	K15015 solute carrier family 32 (vesicular inhibitory amino acid transporter) | (RefSeq) vacuolar amino acid transporter 1-like (A)
IFM89_009803	K17500 integrin-linked kinase-associated serine/threonine phosphatase 2C [EC:3.1.3.16] | (RefSeq) WAT1-related protein At3g18200 isoform X1 (A)
IFM89_023571	K08287 dual-specificity kinase [EC:2.7.12.1] | (RefSeq) serine/threonine-protein kinase AFC1-like (A)
IFM89_028943	K12185 ESCRT-I complex subunit VPS37 | (RefSeq) vacuolar protein-sorting-associated protein 37 homolog 1-like isoform X1 (A)
IFM89_033432	K12854 pre-mRNA-splicing helicase BRR2 [EC:3.6.4.13] | (RefSeq) DExH-box ATP-dependent RNA helicase DExH12-like (A)
IFM89_028216	K12129 pseudo-response regulator 7 | (RefSeq) two-component response regulator-like PRR37 isoform X1 (A)
IFM89_019204	K16282 E3 ubiquitin-protein ligase RHA2 [EC:2.3.2.27] | (RefSeq) probable E3 ubiquitin-protein ligase XERICO (A)
IFM89_003763	K09873 aquaporin TIP | (RefSeq) aquaporin TIP4-1 (A)
IFM89_012512	K01363 cathepsin B [EC:3.4.22.1] | (RefSeq) cathepsin B-like protease 3 (A)
IFM89_034487	K01595 phosphoenolpyruvate carboxylase [EC:4.1.1.31] | (RefSeq) phosphoenolpyruvate carboxylase-like (A)
IFM89_026966	K04077 chaperonin GroEL | (RefSeq) chaperonin CPN60-2, mitochondrial (A)
IFM89_019243	K20562 biphenyl-4-hydroxylase | (RefSeq) cytochrome P450 CYP736A12 (A)
novel.7353	K11838 ubiquitin carboxyl-terminal hydrolase 7 [EC:3.4.19.12] | (RefSeq) ubiquitin carboxyl-terminal hydrolase 12-like (A)
IFM89_030835	K00134 glyceraldehyde 3-phosphate dehydrogenase (phosphorylating) [EC:1.2.1.12] | (RefSeq) glyceraldehyde-3-phosphate dehydrogenase GAPC1, cytosolic (A)
IFM89_028408	K08334 beclin | (RefSeq) beclin-1-like protein (A)
IFM89_023765	K14503 brassinosteroid resistant 1/2 | (RefSeq) BES1/BZR1 homolog protein 2 (A)
IFM89_017140	K10133 tumor protein p53-inducible protein 3 [EC:1.-.-.-] | (RefSeq) NADPH2:quinone reductase (A)
IFM89_011280	K22366 thioredoxin reductase-like selenoprotein T | (RefSeq) selT-like protein (A)
IFM89_028029	K14638 solute carrier family 15 (peptide/histidine transporter), member 3/4 | (RefSeq) protein NRT1/ PTR FAMILY 8.1 (A)
novel.1253	K09486 hypoxia up-regulated 1 | (RefSeq) heat shock 70 kDa protein 17-like (A)
IFM89_023078	K02961 small subunit ribosomal protein S17 | (RefSeq) 30S ribosomal protein S17, chloroplastic (A)
IFM89_001350	K00999 CDP-diacylglycerol--inositol 3-phosphatidyltransferase [EC:2.7.8.11] | (RefSeq) CDP-diacylglycerol--inositol 3-phosphatidyltransferase 1-like (A)
IFM89_030393	K00088 IMP dehydrogenase [EC:1.1.1.205] | (RefSeq) inosine-5'-monophosphate dehydrogenase-like isoform X1 (A)
novel.8457	K02834 ribosome-binding factor A | (RefSeq) probable ribosome-binding factor A, chloroplastic (A)
IFM89_022397	K00940 nucleoside-diphosphate kinase [EC:2.7.4.6] | (RefSeq) nucleoside diphosphate kinase 1 (A)
IFM89_008407	K25075 pterocarpan synthase [EC:4.2.1.139] | (RefSeq) dirigent protein 2-like (A)
IFM89_003114	K13201 nucleolysin TIA-1/TIAR | (RefSeq) RNA-binding domain-containing protein (A)
IFM89_009429	K00020 3-hydroxyisobutyrate dehydrogenase [EC:1.1.1.31] | (RefSeq) probable 3-hydroxyisobutyrate dehydrogenase-like 2, mitochondrial (A)
IFM89_028277	K07964 heparanase [EC:3.2.1.166] | (RefSeq) heparanase-like protein 3 (A)
IFM89_018356	K09843 (+)-abscisic acid 8'-hydroxylase [EC:1.14.14.137] | (RefSeq) abscisic acid 8'-hydroxylase 3 isoform X2 (A)
IFM89_012951	K16616 actin-related protein 8, plant | (RefSeq) actin-related protein 8 (A)
IFM89_014257	K20363 protein YIPF5/7 | (RefSeq) uncharacterized protein LOC114296056 isoform X1 (A)
IFM89_025538	K10849 DNA excision repair protein ERCC-1 | (RefSeq) DNA excision repair protein ERCC-1 (A)
IFM89_022583	K06171 nicastrin | (RefSeq) uncharacterized protein LOC100501623 precursor (A)
IFM89_034842	K04499 RuvB-like protein 1 [EC:5.6.2.4] | (RefSeq) ruvB-like protein 1 (A)
IFM89_021048	K01872 alanyl-tRNA synthetase [EC:6.1.1.7] | (RefSeq) hypothetical protein (A)
IFM89_003486	K20667 beta-amyrin 28-monooxygenase [EC:1.14.14.126] | (RefSeq) beta-amyrin 28-monooxygenase (A)
IFM89_032712	K04733 interleukin-1 receptor-associated kinase 4 [EC:2.7.11.1] | (RefSeq) G-type lectin S-receptor-like serine/threonine-protein kinase RKS1 isoform X1 (A)
IFM89_019590	K04424 sterile alpha motif and leucine zipper containing kinase AZK [EC:2.7.11.25] | (RefSeq) probable serine/threonine-protein kinase SIS8 isoform X1 (A)
IFM89_020123	K05759 profilin | (RefSeq) uncharacterized protein LOC103842625 isoform X1 (A)
IFM89_009773	K13436 pto-interacting protein 1 [EC:2.7.11.1] | (RefSeq) probable receptor-like protein kinase At2g47060 (A)
IFM89_012442	K11254 histone H4 | (RefSeq) histone H4 (A)
IFM89_027999	K00700 1,4-alpha-glucan branching enzyme [EC:2.4.1.18] | (RefSeq) 1,4-alpha-glucan-branching enzyme 3, chloroplastic/amyloplastic (A)
IFM89_002688	K02838 ribosome recycling factor | (RefSeq) ribosome-recycling factor, chloroplastic (A)
IFM89_016290	K22381 E3 ubiquitin-protein ligase ZNF598 [EC:2.3.2.27] | (RefSeq) zinc finger protein 598 (A)
IFM89_033510	K03005 DNA-directed RNA polymerase I subunit RPA49 | (RefSeq) DNA-directed RNA polymerase I subunit rpa49 (A)
IFM89_036501	K17732 mitochondrial-processing peptidase subunit beta [EC:3.4.24.64] | (RefSeq) probable mitochondrial-processing peptidase subunit beta, mitochondrial (A)
IFM89_016537	K01724 4a-hydroxytetrahydrobiopterin dehydratase [EC:4.2.1.96] | (RefSeq) putative pterin-4-alpha-carbinolamine dehydratase (A)
IFM89_013636	K10746 exonuclease 1 [EC:3.1.-.-] | (RefSeq) exonuclease 1 (A)
IFM89_031493	K10144 RING finger and CHY zinc finger domain-containing protein 1 [EC:2.3.2.27] | (RefSeq) RING finger and CHY zinc finger domain-containing protein 1-like (A)
IFM89_003336	K00876 uridine kinase [EC:2.7.1.48] | (RefSeq) inorganic pyrophosphatase TTM1 (A)
IFM89_000418	K02365 separase [EC:3.4.22.49] | (RefSeq) separase (A)
IFM89_004522	K15559 regulator of Ty1 transposition protein 103 | (RefSeq) regulation of nuclear pre-mRNA domain-containing protein 1B-like (A)
IFM89_002894	K05544 tRNA-dihydrouridine synthase 3 [EC:1.3.1.89] | (RefSeq) tRNA-dihydrouridine(47) synthase [NAD(P)(+)]-like (A)
IFM89_002366	K21866 ion channel POLLUX/CASTOR | (RefSeq) ion channel CASTOR (A)
IFM89_012638	K25507 high mobility group B protein, plant | (RefSeq) high mobility group B protein 1-like (A)
IFM89_012633	K19953 TBC1 domain family member 6 | (RefSeq) hypothetical protein (A)
novel.8832	K00966 mannose-1-phosphate guanylyltransferase [EC:2.7.7.13] | (RefSeq) mannose-1-phosphate guanylyltransferase 1 (A)
IFM89_026550	K13459 disease resistance protein RPS2 | (RefSeq) probable disease resistance protein At1g12280 (A)
IFM89_025322	K19791 iron transport multicopper oxidase | (RefSeq) L-ascorbate oxidase homolog (A)
IFM89_013660	K06617 raffinose synthase [EC:2.4.1.82] | (RefSeq) galactinol--sucrose galactosyltransferase (A)
IFM89_030746	K08360 transmembrane ascorbate-dependent reductase [EC:7.2.1.3] | (RefSeq) probable transmembrane ascorbate ferrireductase 4 (A)
IFM89_024472	K22530 ATPase family AAA domain-containing protein 1 [EC:3.6.1.-] | (RefSeq) protein MSP1-like (A)
IFM89_026957	K16578 CLIP-associating protein 1/2 | (RefSeq) CLIP-associated protein-like (A)
IFM89_012882	K03237 translation initiation factor 2 subunit 1 | (RefSeq) eukaryotic translation initiation factor 2 subunit alpha-like (A)
IFM89_037971	K01528 dynamin 1/3 [EC:3.6.5.5] | (RefSeq) dynamin-2A (A)
novel.8505	K01147 exoribonuclease II [EC:3.1.13.1] | (RefSeq) ribonuclease II, chloroplastic/mitochondrial isoform X1 (A)
IFM89_028642	K02912 large subunit ribosomal protein L32e | (GenBank) 60S ribosomal protein L32-1 (A)
IFM89_021467	K15893 glycerate dehydrogenase [EC:1.1.1.29] | (RefSeq) glycerate dehydrogenase (A)
IFM89_031005	K10398 kinesin family member 11 | (RefSeq) kinesin-like protein KIN-5C (A)
IFM89_022832	K03847 alpha-1,6-mannosyltransferase [EC:2.4.1.260] | (RefSeq) dol-P-Man:Man(7)GlcNAc(2)-PP-Dol alpha-1,6-mannosyltransferase-like (A)
IFM89_004200	K03094 S-phase kinase-associated protein 1 | (RefSeq) SKP1-like protein 1A (A)
IFM89_014176	K22324 aliphatic glucosinolate S-oxygenase [EC:1.14.13.237] | (RefSeq) hypothetical protein (A)
novel.5357	K06228 fused [EC:2.7.11.1] | (RefSeq) hypothetical protein (A)
IFM89_006666	K07375 tubulin beta | (RefSeq) tubulin beta-2 chain-like (A)
IFM89_005668	K05387 glutamate receptor, ionotropic, plant | (RefSeq) glutamate receptor 3.4-like (A)
IFM89_026027	K12833 pre-mRNA branch site protein p14 | (RefSeq) splicing factor 3B subunit 6-like protein (A)
IFM89_034765	K17925 sorting nexin-13 | (RefSeq) LOW QUALITY PROTEIN: uncharacterized protein LOC114301317 (A)
IFM89_021448	K10406 kinesin family member C2/C3 | (RefSeq) kinesin-like protein KIN-14G (A)
IFM89_029628	K22909 zinc finger CCCH domain-containing protein 13 | (RefSeq) zinc finger CCCH domain-containing protein 13 (A)
IFM89_028364	K01179 endoglucanase [EC:3.2.1.4] | (RefSeq) endoglucanase 3 (A)
IFM89_025049	K20628 expansin | (RefSeq) expansin-B3-like (A)
IFM89_010258	K06269 serine/threonine-protein phosphatase PP1 catalytic subunit [EC:3.1.3.16] | (RefSeq) serine/threonine-protein phosphatase PP1 isozyme 9 (A)
IFM89_031867	K19600 tubby and related proteins | (RefSeq) tubby-like F-box protein 1 (A)
IFM89_016071	K07277 outer membrane protein insertion porin family | (RefSeq) outer envelope protein 80, chloroplastic isoform X1 (A)
IFM89_028448	K00611 ornithine carbamoyltransferase [EC:2.1.3.3] | (RefSeq) ornithine carbamoyltransferase, chloroplastic-like (A)
IFM89_016826	K04082 molecular chaperone HscB | (RefSeq) iron-sulfur cluster co-chaperone protein HscB, mitochondrial-like (A)
IFM89_019255	K08332 vacuolar protein 8 | (RefSeq) U-box domain-containing protein 3-like (A)
novel.8089	K02542 DNA replication licensing factor MCM6 [EC:5.6.2.3] | (RefSeq) DNA replication licensing factor MCM6 (A)
IFM89_015959	K12397 AP-3 complex subunit beta | (RefSeq) AP3-complex subunit beta-A (A)
IFM89_001137	K16190 glucuronokinase [EC:2.7.1.43] | (RefSeq) probable glucuronokinase 2 (A)
IFM89_028449	K11000 callose synthase [EC:2.4.1.-] | (RefSeq) putative callose synthase 8 (A)
IFM89_032277	K05907 adenylyl-sulfate reductase (glutathione) [EC:1.8.4.9] | (RefSeq) 5'-adenylylsulfate reductase 1, chloroplastic-like (A)
novel.2639	K14827 pre-rRNA-processing protein IPI1 | (RefSeq) uncharacterized protein LOC113272672 (A)
IFM89_038381	K12843 U4/U6 small nuclear ribonucleoprotein PRP3 | (RefSeq) protein RDM16-like isoform X1 (A)
novel.3748	K11593 eukaryotic translation initiation factor 2C | (RefSeq) protein argonaute 4-like (A)
IFM89_028610	K00384 thioredoxin reductase (NADPH) [EC:1.8.1.9] | (RefSeq) thioredoxin reductase 1-like (A)
IFM89_032397	K20301 trafficking protein particle complex subunit 2 | (RefSeq) trafficking protein particle complex subunit 2-like isoform X1 (A)
IFM89_037046	K01206 alpha-L-fucosidase [EC:3.2.1.51] | (RefSeq) alpha-L-fucosidase 3 (A)
IFM89_012158	K04506 E3 ubiquitin-protein ligase SIAH1 [EC:2.3.2.27] | (RefSeq) E3 ubiquitin-protein ligase SINA-like 7 (A)
IFM89_024634	K00799 glutathione S-transferase [EC:2.5.1.18] | (RefSeq) probable glutathione S-transferase (A)
IFM89_038164	K20098 DNA excision repair protein ERCC-6-like 2 [EC:5.6.2.-] | (GenBank) DNA repair and recombination RAD26-like protein, putative (A)
IFM89_026140	K12812 ATP-dependent RNA helicase UAP56/SUB2 [EC:3.6.4.13] | (RefSeq) DEAD-box ATP-dependent RNA helicase 15-like (A)
IFM89_032693	K17302 coatomer subunit beta' | (RefSeq) coatomer subunit beta'-1 (A)
IFM89_036712	K25164 WD repeat-containing protein WRAP73 | (RefSeq) WD repeat-containing protein WRAP73 (A)
novel.8536	K20887 xyloglucan glycosyltransferase 4 [EC:2.4.1.-] | (RefSeq) xyloglucan glycosyltransferase 4-like (A)
IFM89_007596	K08288 protein kinase C substrate 80K-H | (RefSeq) glucosidase 2 subunit beta (A)
novel.5602	K19996 phosphatidylinositol transfer protein SFH5 | (RefSeq) patellin-3 (A)
IFM89_039442	K14503 brassinosteroid resistant 1/2 | (RefSeq) BES1/BZR1 homolog protein 2-like (A)
IFM89_035201	K14493 gibberellin receptor GID1 [EC:3.-.-.-] | (RefSeq) GID1b-1; hypothetical protein (A)
IFM89_001912	K11087 small nuclear ribonucleoprotein D1 | (RefSeq) small nuclear ribonucleoprotein Sm D1 (A)
novel.8698	K20642 Rho GTPase-activating protein 22/24/25 | (RefSeq) hypothetical protein (A)
IFM89_028360	K10615 E3 ubiquitin-protein ligase HERC4 [EC:2.3.2.26] | (RefSeq) probable E3 ubiquitin-protein ligase HERC4 isoform X1 (A)
IFM89_037632	K03247 translation initiation factor 3 subunit H | (RefSeq) eukaryotic translation initiation factor 3 subunit H-like (A)
novel.206	K23966 cyclin L | (RefSeq) cyclin-L1-1 (A)
novel.6584	K07198 5'-AMP-activated protein kinase, catalytic alpha subunit [EC:2.7.11.11] | (RefSeq) CBL-interacting serine/threonine-protein kinase 25 (A)
IFM89_027022	K20617 cytochrome P450 family 71 subfamily A | (RefSeq) cytochrome P450 71A1-like (A)
IFM89_018653	K03018 DNA-directed RNA polymerase III subunit RPC1 [EC:2.7.7.6] | (RefSeq) DNA-directed RNA polymerase III subunit 1 (A)
novel.2762	K02934 large subunit ribosomal protein L6e | (RefSeq) 60S ribosomal protein L6 (A)
novel.1012	K18195 rhamnogalacturonan endolyase [EC:4.2.2.23] | (RefSeq) probable rhamnogalacturonate lyase B (A)
IFM89_016995	K13161 heterogeneous nuclear ribonucleoprotein R | (RefSeq) heterogeneous nuclear ribonucleoprotein Q-like (A)
IFM89_024860	K16732 Ase1/PRC1/MAP65 family protein | (RefSeq) 65-kDa microtubule-associated protein 6-like isoform X1 (A)
IFM89_021713	K00799 glutathione S-transferase [EC:2.5.1.18] | (RefSeq) probable glutathione S-transferase (A)
IFM89_013719	K13065 shikimate O-hydroxycinnamoyltransferase [EC:2.3.1.133] | (RefSeq) HQT (A)
IFM89_006584	K00430 peroxidase [EC:1.11.1.7] | (RefSeq) peroxidase 72-like (A)
IFM89_033737	K10858 DNA mismatch repair protein PMS2 | (RefSeq) DNA mismatch repair protein PMS1-like isoform X1 (A)
novel.5916	K15333 tRNA guanosine-2'-O-methyltransferase [EC:2.1.1.34] | (RefSeq) uncharacterized protein LOC104224633 (A)
IFM89_007360	K13412 calcium-dependent protein kinase [EC:2.7.11.1] | (RefSeq) calcium-dependent protein kinase 1-like (A)
IFM89_027726	K17890 autophagy-related protein 16-1 | (RefSeq) autophagy-related protein 16 isoform X1 (A)
IFM89_008535	K13418 somatic embryogenesis receptor kinase 1 [EC:2.7.10.1 2.7.11.1] | (RefSeq) somatic embryogenesis receptor kinase 1 (A)
IFM89_032543	K08867 WNK lysine deficient protein kinase [EC:2.7.11.1] | (RefSeq) serine/threonine-protein kinase WNK1-like (A)
IFM89_038792	K01304 pyroglutamyl-peptidase [EC:3.4.19.3] | (RefSeq) uncharacterized protein LOC113300083 isoform X1 (A)
IFM89_028639	K17579 protein phosphatase 1 regulatory subunit 42 | (RefSeq) hypothetical protein (A)
IFM89_002529	K25006 RNA-binding protein 24/38 | (RefSeq) RNA-binding protein 38-like (A)
IFM89_030369	K02541 DNA replication licensing factor MCM3 [EC:5.6.2.3] | (RefSeq) DNA replication licensing factor MCM3 homolog 3 (A)
IFM89_037123	K01681 aconitate hydratase [EC:4.2.1.3] | (RefSeq) putative aconitate hydratase, cytoplasmic (A)
IFM89_003535	K12811 ATP-dependent RNA helicase DDX46/PRP5 [EC:3.6.4.13] | (RefSeq) uncharacterized protein LOC117125980 (A)
IFM89_002301	K01456 peptide-N4-(N-acetyl-beta-glucosaminyl)asparagine amidase [EC:3.5.1.52] | (RefSeq) peptide-N(4)-(N-acetyl-beta- glucosaminyl)asparagine amidase isoform X1 (A)
IFM89_002726	K07870 mitochondrial Rho GTPase 1 [EC:3.6.5.-] | (RefSeq) mitochondrial Rho GTPase 1-like (A)
IFM89_000005	K01530 phospholipid-translocating ATPase [EC:7.6.2.1] | (RefSeq) probable phospholipid-transporting ATPase 5 (A)
IFM89_037660	K08495 golgi SNAP receptor complex member 1 | (RefSeq) Golgi SNAP receptor complex member 1-1 (A)
IFM89_026343	K07897 Ras-related protein Rab-7A | (RefSeq) Ras-related protein Rab7 (A)
IFM89_021004	K13448 calcium-binding protein CML | (RefSeq) probable calcium-binding protein CML48 (A)
IFM89_038351	K16818 phospholipase A1 [EC:3.1.1.32] | (RefSeq) phospholipase A(1) DAD1, chloroplastic-like (A)
IFM89_030687	K17604 zinc finger SWIM domain-containing protein 3 | (RefSeq) uncharacterized protein LOC107411697 isoform X1 (A)
IFM89_022450	K13466 EIX receptor 1/2 | (RefSeq) receptor-like protein EIX1 (A)
IFM89_011081	K01520 dUTP pyrophosphatase [EC:3.6.1.23] | (RefSeq) deoxyuridine 5'-triphosphate nucleotidohydrolase (A)
IFM89_010436	K04733 interleukin-1 receptor-associated kinase 4 [EC:2.7.11.1] | (RefSeq) uncharacterized protein LOC120680081 (A)
IFM89_036184	K09419 heat shock transcription factor, other eukaryote | (RefSeq) heat stress transcription factor B-4-like (A)
IFM89_031889	K16815 calcium-independent phospholipase A2-gamma | (RefSeq) Putative lysophospholipase (A)
IFM89_020134	K01476 arginase [EC:3.5.3.1] | (RefSeq) arginase 1, mitochondrial isoform X2 (A)
IFM89_038986	K19367 maspardin | (RefSeq) maspardin (A)
novel.1931	K05929 phosphoethanolamine N-methyltransferase [EC:2.1.1.103] | (RefSeq) phosphoethanolamine N-methyltransferase 3-like (A)
IFM89_023222	K06158 ATP-binding cassette, subfamily F, member 3 | (RefSeq) hypothetical protein (A)
IFM89_014499	K25075 pterocarpan synthase [EC:4.2.1.139] | (RefSeq) dirigent protein 2-like (A)
IFM89_036327	K05658 ATP-binding cassette, subfamily B (MDR/TAP), member 1 [EC:7.6.2.2] | (RefSeq) ABC transporter B family member 2-like (A)
IFM89_010069	K17925 sorting nexin-13 | (RefSeq) uncharacterized protein LOC122658623 (A)
IFM89_005266	K12891 serine/arginine-rich splicing factor 2/8 | (RefSeq) serine/arginine-rich splicing factor SC35-like (A)
IFM89_024215	K02893 large subunit ribosomal protein L23Ae | (RefSeq) 60S ribosomal protein L23A (A)
IFM89_003137	K01738 cysteine synthase [EC:2.5.1.47] | (RefSeq) cysteine synthase (A)
IFM89_035036	K01881 prolyl-tRNA synthetase [EC:6.1.1.15] | (RefSeq) proline--tRNA ligase, cytoplasmic (A)
IFM89_028954	K03844 alpha-1,2-mannosyltransferase [EC:2.4.1.131] | (RefSeq) alpha-1,2-mannosyltransferase (A)
IFM89_000692	K22912 5-amino-6-(5-phospho-D-ribitylamino)uracil phosphatase [EC:3.1.3.104] | (RefSeq) 5-amino-6-(5-phospho-D-ribitylamino)uracil phosphatase, chloroplastic (A)
IFM89_009606	K09566 peptidyl-prolyl isomerase G (cyclophilin G) [EC:5.2.1.8] | (RefSeq) peptidyl-prolyl cis-trans isomerase CYP63 (A)
IFM89_016394	K03671 thioredoxin 1 | (RefSeq) Thioredoxin H-type (A)
IFM89_033462	K03251 translation initiation factor 3 subunit D | (RefSeq) eukaryotic translation initiation factor 3 subunit D-like (A)
IFM89_032932	K13109 IK cytokine | (RefSeq) suppressor of mec-8 and unc-52 protein homolog 2-like (A)
IFM89_002150	K22746 anamorsin | (RefSeq) anamorsin homolog (A)
IFM89_030323	K14405 pre-mRNA 3'-end-processing factor FIP1 | (RefSeq) FIP1[V]-like protein (A)
IFM89_000107	K14826 FK506-binding nuclear protein [EC:5.2.1.8] | (RefSeq) peptidyl-prolyl cis-trans isomerase FKBP43-like isoform X1 (A)
IFM89_026699	K00284 glutamate synthase (ferredoxin) [EC:1.4.7.1] | (RefSeq) ferredoxin-dependent glutamate synthase, chloroplastic (A)
IFM89_034018	K05765 cofilin | (RefSeq) actin-depolymerizing factor 5 (A)
IFM89_020884	K10767 mRNA N6-methyladenine demethylase [EC:1.14.11.53] | (RefSeq) RNA demethylase ALKBH10B isoform X1 (A)
IFM89_035935	K00422 polyphenol oxidase [EC:1.10.3.1] | (RefSeq) PPOA; polyphenol oxidase, chloroplastic-like (A)
IFM89_018825	K20367 endoplasmic reticulum-Golgi intermediate compartment protein 3 | (RefSeq) endoplasmic reticulum-Golgi intermediate compartment protein 3-like (A)
IFM89_004220	K14484 auxin-responsive protein IAA | (RefSeq) auxin-responsive protein IAA1-like (A)
IFM89_014062	K19747 BAHD acyltransferase [EC:2.3.1.-] | (RefSeq) BAHD acyltransferase DCR-like (A)
IFM89_021016	K23538 ELMO domain-containing protein | (RefSeq) ELMO domain-containing protein B isoform X1 (A)
IFM89_037912	K09499 T-complex protein 1 subunit eta | (RefSeq) T-complex protein 1 subunit eta-like (A)
IFM89_030347	K13066 caffeic acid 3-O-methyltransferase / acetylserotonin O-methyltransferase [EC:2.1.1.68 2.1.1.4] | (RefSeq) caffeic acid 3-O-methyltransferase 1-like (A)
IFM89_007726	K15363 fanconi-associated nuclease 1 [EC:3.1.21.- 3.1.4.1] | (RefSeq) fanconi-associated nuclease 1 homolog (A)
IFM89_015911	K11593 eukaryotic translation initiation factor 2C | (RefSeq) protein argonaute 4 isoform X1 (A)
IFM89_021430	K03283 heat shock 70kDa protein 1/2/6/8 | (RefSeq) heat shock cognate 70 kDa protein 2-like (A)
IFM89_011480	K01835 phosphoglucomutase [EC:5.4.2.2] | (RefSeq) phosphoglucomutase, chloroplastic (A)
IFM89_003366	K09487 heat shock protein 90kDa beta | (RefSeq) heat shock protein 90-5, chloroplastic-like (A)
IFM89_017670	K11517 (S)-2-hydroxy-acid oxidase [EC:1.1.3.15] | (RefSeq) peroxisomal (S)-2-hydroxy-acid oxidase (A)
IFM89_025562	K15014 solute carrier family 29 (equilibrative nucleoside transporter), member 1/2/3 | (RefSeq) equilibrative nucleotide transporter 3-like (A)
IFM89_009281	K08726 soluble epoxide hydrolase / lipid-phosphate phosphatase [EC:3.3.2.10 3.1.3.76] | (RefSeq) uncharacterized protein LOC8071538 (A)
novel.2888	K19861 benzyl alcohol O-benzoyltransferase [EC:2.3.1.196 2.3.1.232] | (RefSeq) uncharacterized protein LOC122648611 (A)
IFM89_032930	K12875 apoptotic chromatin condensation inducer in the nucleus | (RefSeq) formin-like protein 5 isoform X1 (A)
IFM89_018826	K20168 TBC1 domain family member 15 | (RefSeq) TBC1 domain family member 15 (A)
IFM89_025401	K14207 solute carrier family 38 (sodium-coupled neutral amino acid transporter), member 2 | (RefSeq) sodium-coupled neutral amino acid transporter 2 (A)
IFM89_014418	K07897 Ras-related protein Rab-7A | (RefSeq) ras-related protein Rab7-like (A)
IFM89_035988	K15634 2,3-bisphosphoglycerate-dependent phosphoglycerate mutase [EC:5.4.2.11] | (RefSeq) metal-independent phosphoserine phosphatase-like (A)
novel.8379	K13436 pto-interacting protein 1 [EC:2.7.11.1] | (RefSeq) PTI1-like tyrosine-protein kinase 1 isoform X1 (A)
IFM89_024205	K11717 cysteine desulfurase / selenocysteine lyase [EC:2.8.1.7 4.4.1.16] | (RefSeq) cysteine desulfurase 1, chloroplastic (A)
IFM89_036802	K00558 DNA (cytosine-5)-methyltransferase 1 [EC:2.1.1.37] | (RefSeq) LOW QUALITY PROTEIN: DNA (cytosine-5)-methyltransferase CMT3-like (A)
novel.5676	K09480 digalactosyldiacylglycerol synthase [EC:2.4.1.241] | (RefSeq) digalactosyldiacylglycerol synthase 1, chloroplastic (A)
IFM89_022665	K08065 nuclear transcription Y subunit beta | (RefSeq) nuclear transcription factor Y subunit B-1 (A)
IFM89_039616	K08900 mitochondrial chaperone BCS1 | (RefSeq) AAA-ATPase ASD, mitochondrial-like (A)
IFM89_039686	K21772 transcriptional activator protein Pur-alpha | (RefSeq) transcription factor Pur-alpha 1 (A)
IFM89_035435	K04645 clathrin light chain B | (RefSeq) clathrin light chain 2 (A)
IFM89_010120	K20456 oxysterol-binding protein 1 | (RefSeq) hypothetical protein (A)
novel.1757	K15078 structure-specific endonuclease subunit SLX1 [EC:3.6.1.-] | (RefSeq) putative disease resistance protein RGA3 (A)
novel.8142	K25006 RNA-binding protein 24/38 | (RefSeq) RNA-binding protein 24-like (A)
IFM89_000202	K17943 pumilio RNA-binding family | (RefSeq) pumilio homolog 5-like isoform X1 (A)
IFM89_015731	no KO assigned | (RefSeq) predicted protein (A)
IFM89_016614	K22565 COMM domain containing 9 | (RefSeq) COMM domain-containing protein 9 (A)
IFM89_039576	K03188 urease accessory protein | (RefSeq) uncharacterized protein LOC108224146 isoform X1 (A)
IFM89_021473	K09872 aquaporin PIP | (RefSeq) probable aquaporin PIP2-8 (A)
IFM89_035115	K19747 BAHD acyltransferase [EC:2.3.1.-] | (RefSeq) BAHD acyltransferase DCR (A)
IFM89_036771	K14488 SAUR family protein | (RefSeq) auxin-induced protein 15A-like (A)
IFM89_035696	K10406 kinesin family member C2/C3 | (RefSeq) kinesin-like protein KIF3B (A)
IFM89_012894	K09753 cinnamoyl-CoA reductase [EC:1.2.1.44] | (RefSeq) cinnamoyl-CoA reductase 1-like (A)
IFM89_010181	K20562 biphenyl-4-hydroxylase | (RefSeq) cytochrome P450 71AU50-like (A)
IFM89_031311	K14413 beta-1,3-galactosyltransferase [EC:2.4.1.-] | (RefSeq) beta-1,3-galactosyltransferase GALT1-like (A)
IFM89_008124	K19891 glucan endo-1,3-beta-glucosidase 1/2/3 [EC:3.2.1.39] | (RefSeq) glucan endo-1,3-beta-glucosidase 3-like (A)
IFM89_028348	K02608 origin recognition complex subunit 6 | (RefSeq) origin of replication complex subunit 6 (A)
IFM89_030368	K09458 3-oxoacyl-[acyl-carrier-protein] synthase II [EC:2.3.1.179] | (RefSeq) 3-oxoacyl-[acyl-carrier-protein] synthase I, chloroplastic-like (A)
IFM89_026117	K02951 small subunit ribosomal protein S12e | (RefSeq) 40S ribosomal protein S12-like (A)
IFM89_011094	K18443 golgi-specific brefeldin A-resistance guanine nucleotide exchange factor 1 | (RefSeq) ARF guanine-nucleotide exchange factor GNOM-like (A)
IFM89_011862	K04122 ent-kaurene oxidase [EC:1.14.14.86] | (RefSeq) ent-kaurene oxidase, chloroplastic-like (A)
IFM89_028284	K13449 pathogenesis-related protein 1 | (RefSeq) pathogenesis-related protein 1-like (A)
IFM89_036151	K13466 EIX receptor 1/2 | (RefSeq) receptor-like protein EIX1 (A)
IFM89_028397	K14819 dual specificity phosphatase 12 [EC:3.1.3.16 3.1.3.48] | (RefSeq) dual specificity protein phosphatase 12-like (A)
IFM89_006946	K15285 solute carrier family 35, member E3 | (RefSeq) UDP-galactose transporter 1 (A)
IFM89_031998	K01193 beta-fructofuranosidase [EC:3.2.1.26] | (RefSeq) beta-fructofuranosidase, soluble isoenzyme I-like (A)
novel.4926	K05758 actin related protein 2/3 complex, subunit 2 | (RefSeq) LOW QUALITY PROTEIN: uncharacterized protein LOC106797677 (A)
IFM89_000891	K20893 probable galacturonosyltransferase-like 1 [EC:2.4.1.-] | (RefSeq) probable galacturonosyltransferase-like 1 (A)
IFM89_031902	K12854 pre-mRNA-splicing helicase BRR2 [EC:3.6.4.13] | (RefSeq) DExH-box ATP-dependent RNA helicase DExH12-like (A)
IFM89_016353	K00454 lipoxygenase [EC:1.13.11.12] | (RefSeq) linoleate 13S-lipoxygenase 2-1, chloroplastic-like (A)
IFM89_025272	K15601 [histone H3]-dimethyl-L-lysine9 demethylase [EC:1.14.11.65] | (RefSeq) lysine-specific demethylase JMJ25-like (A)
IFM89_012198	K15849 bifunctional aspartate aminotransferase and glutamate/aspartate-prephenate aminotransferase [EC:2.6.1.1 2.6.1.78 2.6.1.79] | (RefSeq) bifunctional aspartate aminotransferase and glutamate/aspartate-prephenate aminotransferase-like (A)
IFM89_001382	K09286 EREBP-like factor | (RefSeq) ethylene-responsive transcription factor ERF071 (A)
IFM89_034209	K22736 vacuolar iron transporter family protein | (RefSeq) vacuolar iron transporter homolog 3-like isoform X1 (A)
IFM89_009747	K10523 speckle-type POZ protein | (RefSeq) BTB/POZ domain-containing protein At1g21780 (A)
IFM89_011165	K11971 E3 ubiquitin-protein ligase RNF14 [EC:2.3.2.31] | (RefSeq) E3 ubiquitin-protein ligase RNF14-like (A)
IFM89_001923	K01648 ATP citrate (pro-S)-lyase [EC:2.3.3.8] | (RefSeq) ATP-citrate synthase alpha chain protein 1 (A)
IFM89_013815	K17662 cytochrome b pre-mRNA-processing protein 3 | (RefSeq) uncharacterized protein LOC122066501 isoform X1 (A)
IFM89_029725	K02209 DNA replication licensing factor MCM5 [EC:5.6.2.3] | (RefSeq) DNA replication licensing factor MCM5 (A)
IFM89_037505	K04799 flap endonuclease-1 [EC:3.1.-.-] | (RefSeq) flap endonuclease 1 (A)
novel.7624	K15078 structure-specific endonuclease subunit SLX1 [EC:3.6.1.-] | (RefSeq) uncharacterized protein LOC122057637 isoform X1 (A)
IFM89_029652	K08762 diazepam-binding inhibitor (GABA receptor modulator, acyl-CoA-binding protein) | (RefSeq) acyl-CoA-binding protein (A)
IFM89_039816	K02995 small subunit ribosomal protein S8e | (RefSeq) 40S ribosomal protein S8 (A)
novel.8651	K13447 respiratory burst oxidase [EC:1.6.3.- 1.11.1.-] | (RefSeq) respiratory burst oxidase homolog protein E (A)
IFM89_031172	K18696 glycerophosphodiester phosphodiesterase [EC:3.1.4.46] | (RefSeq) glycerophosphodiester phosphodiesterase GDPD1, chloroplastic-like (A)
novel.1961	K01410 mitochondrial intermediate peptidase [EC:3.4.24.59] | (RefSeq) probable mitochondrial intermediate peptidase, mitochondrial (A)
IFM89_023657	K13436 pto-interacting protein 1 [EC:2.7.11.1] | (RefSeq) probable receptor-like protein kinase At2g47060 (A)
IFM89_029819	K13382 (S)-norcoclaurine synthase [EC:4.2.1.78] | (RefSeq) uncharacterized protein LOC113340282 (A)
IFM89_029863	K13447 respiratory burst oxidase [EC:1.6.3.- 1.11.1.-] | (RefSeq) respiratory burst oxidase homolog protein A-like (A)
IFM89_017535	K03686 molecular chaperone DnaJ | (RefSeq) chaperone protein dnaJ A6, chloroplastic (A)
IFM89_028167	K13448 calcium-binding protein CML | (RefSeq) probable calcium-binding protein CML22 (A)
IFM89_016619	K07375 tubulin beta | (RefSeq) uncharacterized protein LOC123070672 isoform X1 (A)
IFM89_024134	K20180 vacuolar protein sorting-associated protein 16 | (RefSeq) protein VACUOLELESS1 (A)
IFM89_035776	K03364 cell division cycle 20-like protein 1, cofactor of APC complex | (RefSeq) protein FIZZY-RELATED 3 (A)
IFM89_009448	K19613 leucine-rich repeat protein SHOC2 | (RefSeq) putative disease resistance RPP13-like protein 1 (A)
IFM89_035658	K19613 leucine-rich repeat protein SHOC2 | (RefSeq) putative disease resistance RPP13-like protein 1 (A)
IFM89_011738	K07466 replication factor A1 | (RefSeq) replication protein A 70 kDa DNA-binding subunit B (A)
IFM89_039930	K14411 RNA-binding protein Musashi | (RefSeq) heterogeneous nuclear ribonucleoprotein 1-like (A)
novel.6599	K17279 receptor expression-enhancing protein 5/6 | (RefSeq) ribokinase (A)
IFM89_000364	K21596 calmodulin-binding transcription activator | (RefSeq) protein WVD2-like 2 isoform X1 (A)
IFM89_025509	K20240 spermidine dicoumaroyl transferase [EC:2.3.1.249] | (RefSeq) spermidine coumaroyl-CoA acyltransferase-like (A)
IFM89_009984	K13993 HSP20 family protein | (RefSeq) small heat shock protein, chloroplastic-like isoform X1 (A)
IFM89_038677	K15405 midchain alkane hydroxylase | (RefSeq) CYP96A15; cytochrome P450, family 96, subfamily A, polypeptide 15 (A)
IFM89_024734	K22983 cytochrome P450 family 76 subfamily A | (RefSeq) cytochrome P450 76A2-like (A)
IFM89_023093	K16904 dCTP diphosphatase [EC:3.6.1.12] | (RefSeq) dCTP pyrophosphatase 1-like (A)
IFM89_005060	K04508 transducin (beta)-like 1 | (RefSeq) WD40 repeat-containing protein HOS15 isoform X1 (A)
IFM89_016233	K12472 epidermal growth factor receptor substrate 15 | (RefSeq) filaggrin-like (A)
IFM89_009751	K02155 V-type H+-transporting ATPase 16kDa proteolipid subunit | (RefSeq) V-type proton ATPase 16 kDa proteolipid subunit (A)
IFM89_037756	K13832 3-dehydroquinate dehydratase / shikimate dehydrogenase [EC:4.2.1.10 1.1.1.25] | (RefSeq) bifunctional 3-dehydroquinate dehydratase/shikimate dehydrogenase, chloroplastic-like isoform X1 (A)
IFM89_025249	K07390 monothiol glutaredoxin | (RefSeq) monothiol glutaredoxin-S7, chloroplastic (A)
novel.7288	K08869 aarF domain-containing kinase | (RefSeq) uncharacterized protein LOC102622057 isoform X1 (A)
IFM89_021483	K15333 tRNA guanosine-2'-O-methyltransferase [EC:2.1.1.34] | (RefSeq) uncharacterized protein LOC104224633 (A)
IFM89_010878	K04374 cyclic AMP-dependent transcription factor ATF-4 | (RefSeq) basic leucine zipper 61-like (A)
IFM89_005404	K13418 somatic embryogenesis receptor kinase 1 [EC:2.7.10.1 2.7.11.1] | (RefSeq) LRR receptor kinase BAK1 (A)
IFM89_019089	K13800 UMP-CMP kinase [EC:2.7.4.14] | (RefSeq) UMP-CMP kinase isoform X1 (A)
IFM89_014938	K07199 5'-AMP-activated protein kinase, regulatory beta subunit | (RefSeq) 5-AMP-activated protein kinase, beta subunit,interaction domain (A)
IFM89_038412	K04733 interleukin-1 receptor-associated kinase 4 [EC:2.7.11.1] | (RefSeq) 5'-AMP-activated protein kinase catalytic subunit alpha-1-like (A)
IFM89_030980	K13385 N-methylcoclaurine 3'-monooxygenase [EC:1.14.14.102] | (RefSeq) (S)-N-methylcoclaurine 3'-hydroxylase isozyme 1 (A)
IFM89_004096	K00434 L-ascorbate peroxidase [EC:1.11.1.11] | (RefSeq) thylakoid lumenal 29 kDa protein, chloroplastic (A)
IFM89_013377	K07893 Ras-related protein Rab-6A | (RefSeq) ras-related protein RABH1b-like (A)
IFM89_005433	K08913 light-harvesting complex II chlorophyll a/b binding protein 2 | (RefSeq) chlorophyll a-b binding protein 151, chloroplastic (A)
IFM89_010126	K11649 SWI/SNF-related matrix-associated actin-dependent regulator of chromatin subfamily C | (GenBank) F-box and associated interaction domain protein (A)
IFM89_029032	K02068 UDP-glucose/iron transport system ATP-binding protein | (RefSeq) ABC transporter I family member 17-like (A)
IFM89_011095	K09835 prolycopene isomerase [EC:5.2.1.13] | (RefSeq) prolycopene isomerase, chloroplastic (A)
IFM89_013257	K01580 glutamate decarboxylase [EC:4.1.1.15] | (RefSeq) glutamate decarboxylase 4-like (A)
IFM89_007721	K09828 Delta24-sterol reductase [EC:1.3.1.72 1.3.1.-] | (RefSeq) delta(24)-sterol reductase (A)
IFM89_019803	K20718 LRR receptor-like serine/threonine-protein kinase ERECTA [EC:2.7.11.1] | (RefSeq) LRR receptor-like serine/threonine-protein kinase ERL1 (A)
IFM89_016969	K12135 zinc finger protein CONSTANS | (RefSeq) zinc finger protein CONSTANS-like (A)
novel.8230	K21772 transcriptional activator protein Pur-alpha | (RefSeq) transcription factor Pur-alpha 1 (A)
IFM89_000852	K14787 multiple RNA-binding domain-containing protein 1 | (RefSeq) multiple RNA-binding domain-containing protein 1-like isoform X1 (A)
IFM89_011769	K17338 receptor expression-enhancing protein 1/2/3/4 | (RefSeq) putative HVA22-like protein g isoform X1 (A)
IFM89_010810	K20642 Rho GTPase-activating protein 22/24/25 | (RefSeq) rho GTPase-activating protein 2 (A)
IFM89_039380	K22943 protein YIPF6 | (RefSeq) Protein YIPF6 (A)
IFM89_004033	K22395 cinnamyl-alcohol dehydrogenase [EC:1.1.1.195] | (RefSeq) berberine bridge enzyme-like 15 (A)
IFM89_031621	K13508 glycerol-3-phosphate acyltransferase [EC:2.3.1.15 2.3.1.198] | (RefSeq) glycerol-3-phosphate 2-O-acyltransferase 6-like (A)
IFM89_032683	K05605 3-hydroxyisobutyryl-CoA hydrolase [EC:3.1.2.4] | (RefSeq) 3-hydroxyisobutyryl-CoA hydrolase-like protein 3, mitochondrial (A)
IFM89_024276	K22184 bromodomain-containing protein 9 | (RefSeq) uncharacterized protein LOC111985563 (A)
IFM89_030974	K08829 male germ cell-associated kinase [EC:2.7.11.22] | (RefSeq) cyclin-dependent kinase F-4 (A)
IFM89_015058	K25108 licheninase [EC:3.2.1.73] | (RefSeq) glucan endo-1,3-beta-glucosidase-like (A)
[truncated: 16,771 more rows]
