# Supplementary material for: Transcriptome and Metabolome Analysis of Isoquinoline Alkaloid Biosynthesis of Coptis chinensis in Different Years
Source: Genes (Basel). 2023 Dec 18;14(12):2232. doi: 10.3390/genes14122232 (PMC10742649; doi:10.3390/genes14122232)
Supplement: Supplementary file 1 [file genes-14-02232-s001.zip › Supplementary Table S7 DEGs between 2−year and 4−year C.chinensis rhizomes.xlsx]

## Sheet: Sheet1
Supplementary Table 4 DEGs between 2-year C.chinensis and 4-year C.chinensis
ID	Coptis2-1_fpkm	Coptis2-2_fpkm	Coptis2-3_fpkm	Coptis4-1_fpkm	Coptis4-2_fpkm	Coptis4-3_fpkm	Coptis2-1_count	Coptis2-2_count	Coptis2-3_count	Coptis4-1_count	Coptis4-2_count	Coptis4-3_count	log2FoldChange	pvalue	padj	regulated	chr	start	end	strand	gene_name	gene_description	KEGG	KEGG pathway	NR	Swissprot	Tremble	KOG	GO	Pfam	TF-Family	TF-Category	TF-Classification
IFM89_033633	62.9829	76.7368	84.3466	29.558	32.3844	29.2595	1361	1790	2044	748	1064	625	-1.38001	1.83369e-20	3.82453e-16	down	CM027382.1	21658075	21659421	+	IFM89_033633	--	K19747 BAHD acyltransferase [EC:2.3.1.-] | (RefSeq) BAHD acyltransferase DCR (A)	--	hypothetical protein IFM89_033633 [Coptis chinensis]	Y3028_ARATH RecName: Full=Uncharacterized acetyltransferase At3g50280; EC=2.3.1.-;	A0A835HQE1_9MAGN SubName: Full=Uncharacterized protein {ECO:0000313|EMBL:KAF9603006.1};	--	GO:0016746,acyltransferase activity; GO:0003674,molecular_function; GO:0003824,catalytic activity; GO:0016740,transferase activity	PF02458.18:Transferase family	--	--	--
IFM89_034423	34.7082	38.7991	29.8694	14.1623	14.6771	12.4895	745	899	719	356	479	265	-1.4045	7.62749e-18	5.30289e-14	down	CM027377.1	12770342	12772057	-	IFM89_034423	--	K07735 putative transcriptional regulator | (RefSeq) uncharacterized protein LOC111200446 (A)	--	hypothetical protein IFM89_034423 [Coptis chinensis]	--	A0A835IZY2_9MAGN SubName: Full=Uncharacterized protein {ECO:0000313|EMBL:KAF9626489.1};	--	--	PF02622.18:Uncharacterized ACR, COG1678	--	--	--
novel.7566	40.9917	42.3892	40.2835	16.597	12.7835	9.5903	774	864	853	367	367	179	-1.7495	9.75832e-17	4.07058e-13	down	CM027385.1	40173302	40176904	+	--	--	--	--	hypothetical protein IFM89_017630 [Coptis chinensis]	--	A0A835GXZ6_9MAGN SubName: Full=Uncharacterized protein {ECO:0000313|EMBL:KAF9588951.1};	--	GO:0004252,serine-type endopeptidase activity; GO:0006508,proteolysis; GO:0003674,molecular_function; GO:0003824,catalytic activity; GO:0004175,endopeptidase activity; GO:0008233,peptidase activity; GO:0008236,serine-type peptidase activity; GO:0016787,hydrolase activity; GO:0017171,serine hydrolase activity; GO:0140096,catalytic activity, acting on a protein; GO:0006807,nitrogen compound metabol…	--	--	--	--
IFM89_016693	259.612	333.136	244.822	129.183	135.994	120.216	3336	4621	3528	1944	2657	1527	-1.20378	7.63062e-16	2.06787e-12	down	CM027378.1	113200331	113201210	+	IFM89_016693	--	--	--	hypothetical protein IFM89_016693 [Coptis chinensis]	DAD2_PETHY RecName: Full=Probable strigolactone esterase DAD2; EC=3.1.-.-; AltName: Full=Protein DECREASED APICAL DOMINANCE 2;	A0A835IPM8_9MAGN RecName: Full=AB hydrolase-1 domain-containing protein {ECO:0000259|Pfam:PF12697};	--	GO:0016788,hydrolase activity, acting on ester bonds; GO:0010223,secondary shoot formation; GO:1901601,strigolactone biosynthetic process; GO:0003674,molecular_function; GO:0003824,catalytic activity; GO:0016787,hydrolase activity; GO:0001763,morphogenesis of a branching structure; GO:0007275,multicellular organism development; GO:0008150,biological_process; GO:0009653,anatomical structure morpho…	PF12697.10:Alpha/beta hydrolase family	--	--	--
IFM89_028660	152.779	221.221	177.483	52.3864	66.5489	77.6733	4495	7026	5856	1805	2977	2259	-1.5711	1.85636e-15	4.30202e-12	down	CM027385.1	79166088	79168002	-	IFM89_028660	--	K00457 4-hydroxyphenylpyruvate dioxygenase [EC:1.13.11.27] | (RefSeq) 4-hydroxyphenylpyruvate dioxygenase (A)	ko00130: Ubiquinone and other terpenoid-quinone biosynthesis; ko00350: Tyrosine metabolism; ko00360: Phenylalanine metabolism; ko01100: Metabolic pathways; ko01240: Biosynthesis of cofactors	hypothetical protein IFM89_028660 [Coptis chinensis]	HPPD_ARATH RecName: Full=4-hydroxyphenylpyruvate dioxygenase; EC=1.13.11.27 {ECO:0000269|PubMed:15301540}; AltName: Full=4-hydroxyphenylpyruvic acid oxidase; Short=4HPPD; Short=HPD; Short=HPPDase;	A0A835LJM8_9MAGN RecName: Full=4-hydroxyphenylpyruvate dioxygenase {ECO:0000256|PIRNR:PIRNR009283};	4-hydroxyphenylpyruvate dioxygenase	GO:0005737,cytoplasm; GO:0003868,4-hydroxyphenylpyruvate dioxygenase activity; GO:0042802,identical protein binding; GO:0005506,iron ion binding; GO:0006559,L-phenylalanine catabolic process; GO:0006572,tyrosine catabolic process; GO:0003674,molecular_function; GO:0003824,catalytic activity; GO:0016491,oxidoreductase activity; GO:0016701,oxidoreductase activity, acting on single donors with incor…	PF00903.28:Glyoxalase/Bleomycin resistance protein/Dioxygenase superfamily	--	--	--
IFM89_004116	17.1135	23.5226	22.263	7.9633	8.6946	8.6397	523	776	763	285	404	261	-1.39814	6.05079e-15	1.26201e-11	down	CM027384.1	75394371	75398617	+	IFM89_004116	--	K03294 basic amino acid/polyamine antiporter, APA family | (RefSeq) cationic amino acid transporter 1 isoform X1 (A)	--	hypothetical protein IFM89_004116, partial [Coptis chinensis]	CAAT7_ARATH RecName: Full=Cationic amino acid transporter 7, chloroplastic; Flags: Precursor;	A0A835H6D1_9MAGN RecName: Full=AA_permease_C domain-containing protein {ECO:0000259|Pfam:PF13906};	Amino acid transporters	GO:0031969,chloroplast membrane; GO:0016021,integral component of membrane; GO:0005886,plasma membrane; GO:0015171,amino acid transmembrane transporter activity; GO:0006865,amino acid transport; GO:0003674,molecular_function; GO:0005215,transporter activity; GO:0005342,organic acid transmembrane transporter activity; GO:0022857,transmembrane transporter activity; GO:0046943,carboxylic acid transm…	PF13520.9:Amino acid permease	--	--	--
IFM89_016791	25.007	31.3669	27.0191	65.2297	66.9892	61.6752	274	371	332	837	1116	668	1.13318	9.66715e-15	1.73122e-11	up	CM027377.1	45275788	45276790	+	IFM89_016791	--	--	--	hypothetical protein IFM89_016791 [Coptis chinensis]	FLZ2_ARATH RecName: Full=FCS-Like Zinc finger 2 {ECO:0000303|PubMed:24901469};	A0A835MIH7_9MAGN RecName: Full=FLZ-type domain-containing protein {ECO:0000259|PROSITE:PS51795};	--	GO:0019900,kinase binding; GO:0046872,metal ion binding; GO:0009749,response to glucose; GO:1905582,response to mannose; GO:0042594,response to starvation; GO:0009744,response to sucrose; GO:0003674,molecular_function; GO:0005488,binding; GO:0005515,protein binding; GO:0019899,enzyme binding; GO:0043167,ion binding; GO:0043169,cation binding; GO:0008150,biological_process; GO:0009743,response to …	PF04570.17:zinc-finger of the FCS-type, C2-C2	--	--	--
IFM89_034725	60.223	73.6593	66.1268	30.9738	36.3869	26.5412	2766	3652	3406	1666	2541	1205	-1.1738	3.50634e-14	5.62551e-11	down	CM027384.1	61259843	61273312	-	IFM89_034725	--	K15015 solute carrier family 32 (vesicular inhibitory amino acid transporter) | (RefSeq) vacuolar amino acid transporter 1 (A)	--	hypothetical protein IFM89_034725 [Coptis chinensis]	AVT1C_ARATH RecName: Full=Amino acid transporter AVT1C {ECO:0000305}; Short=AtAvt1C {ECO:0000303|PubMed:27925655};	A0A835LJH0_9MAGN RecName: Full=Aa_trans domain-containing protein {ECO:0000259|Pfam:PF01490};	Amino acid transporters	GO:0016021,integral component of membrane; GO:0016020,membrane; GO:0000325,plant-type vacuole; GO:0015171,amino acid transmembrane transporter activity; GO:0003333,amino acid transmembrane transport; GO:0003674,molecular_function; GO:0005215,transporter activity; GO:0005342,organic acid transmembrane transporter activity; GO:0022857,transmembrane transporter activity; GO:0046943,carboxylic acid t…	PF01490.21:Transmembrane amino acid transporter protein	--	--	--
IFM89_014288	200.755	215.484	186.617	38.786	83.2619	62.921	4380	5075	4566	991	2762	1357	-1.78522	2.17553e-12	2.38816e-09	down	CM027381.1	10702221	10707195	-	IFM89_014288	--	K22418 11beta/17beta-hydroxysteroid dehydrogenase [EC:1.1.1.146 1.1.1.-] | (RefSeq) 11-beta-hydroxysteroid dehydrogenase 1A-like (A)	--	hypothetical protein IFM89_014288 [Coptis chinensis]	HSDA_ARAHY RecName: Full=11-beta-hydroxysteroid dehydrogenase A {ECO:0000305}; EC=1.1.1.146 {ECO:0000250|UniProtKB:Q93W57}; AltName: Full=17-beta-hydroxysteroid dehydrogenase A {ECO:0000305}; EC=1.1.1.- {ECO:0000250|UniProtKB:Q93W57}; AltName: Full=Steroleosin-A {ECO:0000303|PubMed:25860789, ECO:0000312|EMBL:ABS28874.1, ECO:0000312|EMBL:ABX38844.1};	A0A835HSN2_9MAGN SubName: Full=Uncharacterized protein {ECO:0000313|EMBL:KAF9605175.1};	Predicted dehydrogenase	GO:0016021,integral component of membrane; GO:0005811,lipid droplet; GO:0070524,11-beta-hydroxysteroid dehydrogenase (NADP+) activity; GO:0102196,cortisol dehydrogenase activity; GO:0003674,molecular_function; GO:0003824,catalytic activity; GO:0003845,11-beta-hydroxysteroid dehydrogenase [NAD(P)] activity; GO:0016229,steroid dehydrogenase activity; GO:0016491,oxidoreductase activity; GO:0016614,o…	PF00106.28:short chain dehydrogenase	--	--	--
novel.3090	33.9751	33.844	20.3451	4.9162	8.4146	7.55	478	514	321	81	180	105	-2.15777	2.79725e-12	2.79113e-09	down	CM027380.1	8931159	8932035	.	--	--	--	--	hypothetical protein AQUCO_01300562v1 [Aquilegia coerulea]	BASS5_ORYSI RecName: Full=Probable sodium/metabolite cotransporter BASS5, chloroplastic; AltName: Full=Bile acid-sodium symporter family protein 5; Flags: Precursor;	A0A2G5E2I0_AQUCA SubName: Full=Uncharacterized protein {ECO:0000313|EMBL:PIA49911.1};	Na+-bile acid cotransporter	GO:0009941,chloroplast envelope; GO:0016021,integral component of membrane; GO:0005575,cellular_component; GO:0005622,intracellular anatomical structure; GO:0005737,cytoplasm; GO:0009507,chloroplast; GO:0009526,plastid envelope; GO:0009536,plastid; GO:0031967,organelle envelope; GO:0031975,envelope; GO:0043226,organelle; GO:0043227,membrane-bounded organelle; GO:0043229,intracellular organelle; G…	PF01758.19:Sodium Bile acid symporter family	--	--	--
IFM89_013433	1562.78	1819.7	1513.55	519.585	681.391	851.98	14190	17836	15412	5525	9407	7647	-1.33637	2.89758e-12	2.79113e-09	down	CM027385.1	14017793	14019049	-	IFM89_013433	--	K01602 ribulose-bisphosphate carboxylase small chain [EC:4.1.1.39] | (RefSeq) ribulose bisphosphate carboxylase small chain, chloroplastic (A)	ko00630: Glyoxylate and dicarboxylate metabolism; ko00710: Carbon fixation in photosynthetic organisms; ko01100: Metabolic pathways; ko01110: Biosynthesis of secondary metabolites; ko01200: Carbon metabolism	hypothetical protein IFM89_013433 [Coptis chinensis]	RBS_LACSA RecName: Full=Ribulose bisphosphate carboxylase small subunit, chloroplastic {ECO:0000255|HAMAP-Rule:MF_00860}; Short=RuBisCO small subunit {ECO:0000255|HAMAP-Rule:MF_00860}; Flags: Precursor;	A0A835LII2_9MAGN RecName: Full=Ribulose bisphosphate carboxylase small subunit, chloroplastic {ECO:0000256|HAMAP-Rule:MF_00860}; Short=RuBisCO small subunit {ECO:0000256|HAMAP-Rule:MF_00860};	--	GO:0009507,chloroplast; GO:0009853,photorespiration; GO:0019253,reductive pentose-phosphate cycle; GO:0008150,biological_process; GO:0008152,metabolic process; GO:0009987,cellular process; GO:0043094,cellular metabolic compound salvage; GO:0044237,cellular metabolic process; GO:0005975,carbohydrate metabolic process; GO:0009058,biosynthetic process; GO:0015977,carbon fixation; GO:0015979,photosyn…	PF00101.23:Ribulose bisphosphate carboxylase, small chain	--	--	--
novel.3183	31.9229	51.1989	34.0722	10.7788	13.5591	14.594	655	1134	784	259	423	296	-1.67378	2.94409e-12	2.79113e-09	down	CM027380.1	17651933	17653211	-	--	--	--	--	hypothetical protein AQUCO_01400570v1 [Aquilegia coerulea]	--	A0A2G5DX09_AQUCA RecName: Full=J domain-containing protein {ECO:0000259|PROSITE:PS50076};	--	--	PF00226.34:DnaJ domain	--	--	--
IFM89_018919	490.858	627.353	424.361	148.951	179.088	243.429	14371	19827	13933	5107	7972	7045	-1.51546	3.28436e-12	2.97834e-09	down	CM027383.1	20302377	20306307	-	IFM89_018919	--	--	--	hypothetical protein IFM89_018919 [Coptis chinensis]	--	A0A835LJ35_9MAGN SubName: Full=Uncharacterized protein {ECO:0000313|EMBL:KAF9597473.1};	--	--	--	--	--	--
IFM89_014928	14.9501	17.7626	16.7048	43.4733	32.0832	38.1259	407	522	510	1386	1328	1026	1.11557	5.09061e-12	4.42395e-09	up	CM027384.1	259899	267215	-	IFM89_014928	--	K05929 phosphoethanolamine N-methyltransferase [EC:2.1.1.103] | (RefSeq) phosphomethylethanolamine N-methyltransferase-like (A)	ko00564: Glycerophospholipid metabolism	hypothetical protein IFM89_014928 [Coptis chinensis]	PEAM2_ARATH RecName: Full=Phosphomethylethanolamine N-methyltransferase; Short=AtPMEAMT; EC=2.1.1.-; AltName: Full=Phosphoethanolamine N-methyltransferase 2;	A0A835H8H1_9MAGN RecName: Full=Methyltransf_11 domain-containing protein {ECO:0000259|Pfam:PF08241};	SAM-dependent methyltransferases	GO:0005737,cytoplasm; GO:0003729,mRNA binding; GO:0000234,phosphoethanolamine N-methyltransferase activity; GO:0052667,phosphomethylethanolamine N-methyltransferase activity; GO:0032259,methylation; GO:0006656,phosphatidylcholine biosynthetic process; GO:0003674,molecular_function; GO:0003676,nucleic acid binding; GO:0003723,RNA binding; GO:0005488,binding; GO:0097159,organic cyclic compound bind…	PF08241.15:Methyltransferase domain	--	--	--
IFM89_037381	27.9035	37.5879	40.2522	83.2486	85.5035	112.395	654	951	1058	2285	3047	2604	1.32665	9.01813e-12	7.37314e-09	up	CM027379.1	118890494	118892666	-	IFM89_037381	--	K13385 N-methylcoclaurine 3'-monooxygenase [EC:1.14.14.102] | (RefSeq) (S)-N-methylcoclaurine 3'-hydroxylase isozyme 1 (A)	ko00950: Isoquinoline alkaloid biosynthesis; ko01100: Metabolic pathways; ko01110: Biosynthesis of secondary metabolites	hypothetical protein IFM89_037381 [Coptis chinensis]	C80G2_COPJA RecName: Full=Corytuberine synthase {ECO:0000312|EMBL:BAF80448.1}; EC=1.14.19.51 {ECO:0000269|PubMed:18230623}; AltName: Full=Cytochrome P450 80G2;	A0A835II91_9MAGN SubName: Full=Uncharacterized protein {ECO:0000313|EMBL:KAF9617569.1};	Cytochrome P450 CYP2 subfamily	GO:0005789,endoplasmic reticulum membrane; GO:0016021,integral component of membrane; GO:0102963,(S)-corytuberine synthase activity; GO:0020037,heme binding; GO:0005506,iron ion binding; GO:0004497,monooxygenase activity; GO:0009820,alkaloid metabolic process; GO:0019438,aromatic compound biosynthetic process; GO:1901362,organic cyclic compound biosynthetic process; GO:0003674,molecular_function;…	PF00067.25:Cytochrome P450	--	--	--
IFM89_002418	76.6128	78.3919	67.1776	41.6309	36.4935	31.5888	660	729	649	420	478	269	-1.10099	9.19124e-12	7.37314e-09	down	CM027378.1	96043707	96044243	+	IFM89_002418	--	K19040 E3 ubiquitin-protein ligase ATL10/75/76/77/78 [EC:2.3.2.27] | (RefSeq) RING-H2 finger protein ATL78-like (A)	--	hypothetical protein IFM89_002418 [Coptis chinensis]	ATL80_ARATH RecName: Full=RING-H2 finger protein ATL80; EC=2.3.2.27 {ECO:0000305}; AltName: Full=RING-type E3 ubiquitin transferase ATL80 {ECO:0000305};	A0A835ILF9_9MAGN RecName: Full=RING-type domain-containing protein {ECO:0000259|PROSITE:PS50089};	FOG: Predicted E3 ubiquitin ligase	GO:0016021,integral component of membrane; GO:0005886,plasma membrane; GO:0046872,metal ion binding; GO:0061630,ubiquitin protein ligase activity; GO:0070417,cellular response to cold; GO:0006952,defense response; GO:0009909,regulation of flower development; GO:0010966,regulation of phosphate transport; GO:0003674,molecular_function; GO:0005488,binding; GO:0043167,ion binding; GO:0043169,cation b…	PF13639.9:Ring finger domain	--	--	--
IFM89_001988	7.1543	8.3717	5.1586	1.5784	1.3508	2.1124	209	264	169	54	60	61	-2.1301	1.69301e-11	1.30782e-08	down	CM027382.1	24067971	24072132	+	IFM89_001988	--	K09843 (+)-abscisic acid 8'-hydroxylase [EC:1.14.14.137] | (RefSeq) abscisic acid 8'-hydroxylase 4 (A)	ko00906: Carotenoid biosynthesis; ko01110: Biosynthesis of secondary metabolites	hypothetical protein IFM89_001988 [Coptis chinensis]	ABAH1_SOLLC RecName: Full=Abscisic acid 8'-hydroxylase CYP707A1 {ECO:0000305}; Short=ABA 8'-hydroxylase CYP707A1 {ECO:0000305}; Short=SlCYP707A1 {ECO:0000303|PubMed:19322584}; EC=1.14.14.137 {ECO:0000250|UniProtKB:Q949P1}; AltName: Full=Cytochrome P450 707A1 {ECO:0000303|PubMed:19322584};	A0A835HN62_9MAGN SubName: Full=Uncharacterized protein {ECO:0000313|EMBL:KAF9599953.1};	Cytochrome P450 CYP4/CYP19/CYP26 subfamilies	GO:0016021,integral component of membrane; GO:0010295,(+)-abscisic acid 8'-hydroxylase activity; GO:0020037,heme binding; GO:0005506,iron ion binding; GO:0004497,monooxygenase activity; GO:0016491,oxidoreductase activity; GO:0046345,abscisic acid catabolic process; GO:0009856,pollination; GO:0009737,response to abscisic acid; GO:0009733,response to auxin; GO:0009414,response to water deprivation;…	PF00067.25:Cytochrome P450	--	--	--
IFM89_009523	14.4444	16.1	10.2628	3.8256	2.0321	2.6568	187	225	149	58	40	34	-2.35326	1.85255e-11	1.34983e-08	down	CM027381.1	43037737	43058950	+	IFM89_009523	--	K16196 eukaryotic translation initiation factor 2-alpha kinase 4 [EC:2.7.11.1] | (RefSeq) eIF-2-alpha kinase GCN2 (A)	ko04141: Protein processing in endoplasmic reticulum	hypothetical protein IFM89_009523 [Coptis chinensis]	GCN2_ARATH RecName: Full=eIF-2-alpha kinase GCN2 {ECO:0000250|UniProtKB:Q9HGN1}; AltName: Full=serine/threonine-protein kinase GCN2 {ECO:0000250|UniProtKB:P15442}; EC=2.7.11.1;	A0A835HUN7_9MAGN SubName: Full=Uncharacterized protein {ECO:0000313|EMBL:KAF9604727.1};	eIF-2alpha kinase GCN2	GO:0005829,cytosol; GO:0005524,ATP binding; GO:0004694,eukaryotic translation initiation factor 2alpha kinase activity; GO:0004672,protein kinase activity; GO:0106310,protein serine kinase activity; GO:0000049,tRNA binding; GO:0034198,cellular response to amino acid starvation; GO:0072755,cellular response to benomyl; GO:0070301,cellular response to hydrogen peroxide; GO:1990451,cellular stress r…	--	--	--	--
IFM89_016965	688.057	988.943	955.137	372.899	474.421	405.495	31039	48158	48320	19700	32540	18082	-1.15439	1.9376e-11	1.34983e-08	down	CM027381.1	78278392	78281284	-	IFM89_016965	--	K01177 beta-amylase [EC:3.2.1.2] | (RefSeq) hypothetical protein (A)	ko00500: Starch and sucrose metabolism; ko01100: Metabolic pathways; ko01110: Biosynthesis of secondary metabolites	hypothetical protein IFM89_016965 [Coptis chinensis]	BAM9_ARATH RecName: Full=Inactive beta-amylase 9; AltName: Full=1,4-alpha-D-glucan maltohydrolase; AltName: Full=Inactive beta-amylase 3;	A0A835HW20_9MAGN RecName: Full=Beta-amylase {ECO:0000256|RuleBase:RU000509}; EC=3.2.1.2 {ECO:0000256|RuleBase:RU000509};	--	GO:0005737,cytoplasm; GO:0016161,beta-amylase activity; GO:0000272,polysaccharide catabolic process; GO:0003674,molecular_function; GO:0003824,catalytic activity; GO:0004553,hydrolase activity, hydrolyzing O-glycosyl compounds; GO:0016160,amylase activity; GO:0016787,hydrolase activity; GO:0016798,hydrolase activity, acting on glycosyl bonds; GO:0005975,carbohydrate metabolic process; GO:0005976,…	PF01373.20:Glycosyl hydrolase family 14	--	--	--
IFM89_029031	122.201	125.02	106.124	51.2079	57.7759	70.5524	2376	2624	2314	1166	1708	1356	-1.0605	1.94985e-11	1.34983e-08	down	CM027379.1	28020513	28022628	+	IFM89_029031	--	K02068 UDP-glucose/iron transport system ATP-binding protein | (RefSeq) ABC transporter I family member 17-like (A)	--	hypothetical protein IFM89_029031 [Coptis chinensis]	AB17I_ARATH RecName: Full=ABC transporter I family member 17; Short=ABC transporter ABCI.17; Short=AtABCI17; AltName: Full=MRP-related protein 1; AltName: Full=Non-intrinsic ABC protein 3;	A0A835M261_9MAGN RecName: Full=ABC transporter domain-containing protein {ECO:0000259|PROSITE:PS50893};	Multidrug/pheromone exporter, ABC superfamily	GO:0000325,plant-type vacuole; GO:0005886,plasma membrane; GO:0005524,ATP binding; GO:0005315,inorganic phosphate transmembrane transporter activity; GO:0035435,phosphate ion transmembrane transport; GO:0000166,nucleotide binding; GO:0003674,molecular_function; GO:0005488,binding; GO:0017076,purine nucleotide binding; GO:0030554,adenyl nucleotide binding; GO:0032553,ribonucleotide binding; GO:003…	PF00005.30:ABC transporter	--	--	--
IFM89_010499	16.4442	19.3272	21.2563	48.9103	39.7123	39.5469	387	491	561	1348	1421	920	1.08249	2.00627e-11	1.34983e-08	up	CM027385.1	25923516	25925053	+	IFM89_010499	--	K19891 glucan endo-1,3-beta-glucosidase 1/2/3 [EC:3.2.1.39] | (RefSeq) hypothetical protein (A)	ko00500: Starch and sucrose metabolism; ko01100: Metabolic pathways	hypothetical protein IFM89_010499 [Coptis chinensis]	E1312_ARATH RecName: Full=Glucan endo-1,3-beta-glucosidase 12; EC=3.2.1.39; AltName: Full=(1->3)-beta-glucan endohydrolase 12; Short=(1->3)-beta-glucanase 12; AltName: Full=Beta-1,3-endoglucanase 12; Short=Beta-1,3-glucanase 12; Flags: Precursor;	A0A835LAS5_9MAGN RecName: Full=X8 domain-containing protein {ECO:0000259|SMART:SM00768};	--	GO:0031225,anchored component of membrane; GO:0046658,anchored component of plasma membrane; GO:0005576,extracellular region; GO:0042973,glucan endo-1,3-beta-D-glucosidase activity; GO:0005975,carbohydrate metabolic process; GO:0071555,cell wall organization; GO:0006952,defense response; GO:0003674,molecular_function; GO:0003824,catalytic activity; GO:0004553,hydrolase activity, hydrolyzing O-gly…	PF00332.21:Glycosyl hydrolases family 17	--	--	--
novel.6557	4.2993	3.7071	3.1658	0.5432	0.6951	1.2768	419	390	346	62	103	123	-2.24031	5.36833e-11	3.29315e-08	down	CM027384.1	18363126	18373062	+	--	--	K08493 vesicle transport through interaction with t-SNAREs 1 | (RefSeq) vesicle transport v-SNARE 13-like (A)	ko04130: SNARE interactions in vesicular transport	Vesicle transport v-snare [Thalictrum thalictroides]	VTI13_ARATH RecName: Full=Vesicle transport v-SNARE 13 {ECO:0000303|PubMed:24737717}; Short=AtVTI13 {ECO:0000303|PubMed:24737717}; AltName: Full=Vesicle soluble NSF attachment protein receptor 13 {ECO:0000303|PubMed:24737717}; AltName: Full=Vesicle transport v-SNARE protein VTI13 {ECO:0000303|PubMed:24737717};	A0A5K0X8T9_9MAGN SubName: Full=Uncharacterized protein {ECO:0000313|EMBL:VVV61797.1}; Flags: Fragment;	V-SNARE	GO:0031901,early endosome membrane; GO:0005789,endoplasmic reticulum membrane; GO:0010008,endosome membrane; GO:0012507,ER to Golgi transport vesicle membrane; GO:0005794,Golgi apparatus; GO:0016021,integral component of membrane; GO:0031902,late endosome membrane; GO:0009705,plant-type vacuole membrane; GO:0031201,SNARE complex; GO:0005484,SNAP receptor activity; GO:0000149,SNARE binding; GO:000…	PF20122.2:Family of unknown function (DUF6512)	--	--	--
IFM89_019818	424.71	433.482	329.698	160.356	209.758	214.484	7556	8325	6578	3341	5674	3772	-1.10557	6.84428e-11	4.0786e-08	down	CM027379.1	104088757	104090846	-	IFM89_019818	--	--	--	hypothetical protein IFM89_019818 [Coptis chinensis]	O3L2_ARATH RecName: Full=Protein OXIDATIVE STRESS 3 LIKE 2 {ECO:0000303|PubMed:18980652}; Short=AtO3L2 {ECO:0000303|PubMed:18980652};	A0A835I960_9MAGN SubName: Full=Uncharacterized protein {ECO:0000313|EMBL:KAF9614690.1};	Nuclear localization sequence binding protein	GO:0005634,nucleus; GO:0000325,plant-type vacuole; GO:0005575,cellular_component; GO:0005622,intracellular anatomical structure; GO:0043226,organelle; GO:0043227,membrane-bounded organelle; GO:0043229,intracellular organelle; GO:0043231,intracellular membrane-bounded organelle; GO:0110165,cellular anatomical entity; GO:0005737,cytoplasm; GO:0005773,vacuole	--	--	--	--
IFM89_003733	51.5966	45.8264	75.1443	171.174	157.273	129.697	1576	1511	2574	6123	7304	3916	1.32416	1.18171e-10	6.66131e-08	up	CM027380.1	11642253	11645921	+	IFM89_003733	--	K01626 3-deoxy-7-phosphoheptulonate synthase [EC:2.5.1.54] | (RefSeq) phospho-2-dehydro-3-deoxyheptonate aldolase 1, chloroplastic-like (A)	ko00400: Phenylalanine, tyrosine and tryptophan biosynthesis; ko01100: Metabolic pathways; ko01110: Biosynthesis of secondary metabolites; ko01230: Biosynthesis of amino acids	hypothetical protein IFM89_003733 [Coptis chinensis]	AROG1_PETHY RecName: Full=Phospho-2-dehydro-3-deoxyheptonate aldolase 1, chloroplastic {ECO:0000305}; EC=2.5.1.54 {ECO:0000250|UniProtKB:O53512}; AltName: Full=3-deoxy-D-arabino-heptulosonate 7-phosphate synthase 1 {ECO:0000303|PubMed:23275577, ECO:0000303|PubMed:24815009}; Short=DAHP synthase 1 {ECO:0000305}; Short=PhDAHP1 {ECO:0000303|PubMed:24815009}; AltName: Full=Phospho-2-keto-3-deoxyhepton…	A0A835HZI1_9MAGN RecName: Full=Phospho-2-dehydro-3-deoxyheptonate aldolase {ECO:0000256|RuleBase:RU363071}; EC=2.5.1.54 {ECO:0000256|RuleBase:RU363071};	--	GO:0009507,chloroplast; GO:0003849,3-deoxy-7-phosphoheptulonate synthase activity; GO:0046872,metal ion binding; GO:0009073,aromatic amino acid family biosynthetic process; GO:0008652,cellular amino acid biosynthetic process; GO:0009423,chorismate biosynthetic process; GO:0010597,green leaf volatile biosynthetic process; GO:0003674,molecular_function; GO:0003824,catalytic activity; GO:0016740,tra…	PF01474.19:Class-II DAHP synthetase family	--	--	--
IFM89_038178	463.974	409.005	330.903	112.21	180.391	181.34	4131	3931	3304	1170	2442	1596	-1.42652	1.3025e-10	7.14899e-08	down	CM027380.1	75324053	75325878	+	IFM89_038178	--	K25304 DNA-directed RNA polymerase III subunit RPC9 | (RefSeq) DNA-directed RNA polymerase III subunit rpc9-like (A)	ko03020: RNA polymerase	hypothetical protein IFM89_038178 [Coptis chinensis]	--	A0A835I3T5_9MAGN RecName: Full=DNA-directed RNA polymerase III subunit RPC9 {ECO:0000256|ARBA:ARBA00016672};	Predicted RNA polymerase III subunit C17	GO:0005666,RNA polymerase III complex; GO:0000166,nucleotide binding; GO:0006384,transcription initiation at RNA polymerase III promoter; GO:0003674,molecular_function; GO:0005488,binding; GO:0036094,small molecule binding; GO:0097159,organic cyclic compound binding; GO:1901265,nucleoside phosphate binding; GO:1901363,heterocyclic compound binding; GO:0006139,nucleobase-containing compound metabo…	PF03874.19:RNA polymerase Rpb4	--	--	--
IFM89_033983	364.998	413.959	322.569	163.639	200.297	216.152	2916	3570	2890	1531	2433	1707	-1.00833	2.21071e-10	1.18227e-07	down	CM027378.1	105017259	105017756	-	IFM89_033983	--	K03686 molecular chaperone DnaJ | (RefSeq) hypothetical protein (A)	--	hypothetical protein IFM89_033983 [Coptis chinensis]	DNJ11_ARATH RecName: Full=Chaperone protein dnaJ 11, chloroplastic; Short=AtDjC11; Short=AtJ11; Flags: Precursor;	A0A835M7N4_9MAGN RecName: Full=J domain-containing protein {ECO:0000259|PROSITE:PS50076};	Molecular chaperone (DnaJ superfamily)	GO:0009507,chloroplast; GO:0009570,chloroplast stroma; GO:0005634,nucleus; GO:0009536,plastid; GO:0005575,cellular_component; GO:0005622,intracellular anatomical structure; GO:0005737,cytoplasm; GO:0043226,organelle; GO:0043227,membrane-bounded organelle; GO:0043229,intracellular organelle; GO:0043231,intracellular membrane-bounded organelle; GO:0110165,cellular anatomical entity; GO:0009532,plas…	PF00226.34:DnaJ domain	--	--	--
IFM89_023516	98.6124	104.832	85.5797	38.4907	48.7879	55.0492	1457	1672	1418	666	1096	804	-1.10519	3.1462e-10	1.56239e-07	down	CM027382.1	61105706	61114037	-	IFM89_023516	--	--	--	hypothetical protein IFM89_023516 [Coptis chinensis]	HHL1_ARATH RecName: Full=Protein HHL1, chloroplastic {ECO:0000305}; AltName: Full=Hypersensitive to high light 1 {ECO:0000303|PubMed:24632535}; Flags: Precursor;	A0A835HLS9_9MAGN SubName: Full=Uncharacterized protein {ECO:0000313|EMBL:KAF9601829.1};	Metalloendopeptidase family - saccharolysin & thimet oligopeptidase	GO:0009507,chloroplast; GO:0009941,chloroplast envelope; GO:0009534,chloroplast thylakoid; GO:0009535,chloroplast thylakoid membrane; GO:0016021,integral component of membrane; GO:0005739,mitochondrion; GO:0003729,mRNA binding; GO:0003674,molecular_function; GO:0003676,nucleic acid binding; GO:0003723,RNA binding; GO:0005488,binding; GO:0097159,organic cyclic compound binding; GO:1901363,heterocy…	PF20133.2:Protein HHL1-like	--	--	--
novel.6789	0.0215	0	0.0959	7.4045	2.4907	0.7619	1	0	5	403	176	35	6.39138	4.88623e-10	2.37005e-07	up	CM027384.1	47283323	47288246	+	--	--	K01148 poly(A)-specific ribonuclease [EC:3.1.13.4] | (RefSeq) poly(A)-specific ribonuclease PARN (A)	ko03018: RNA degradation	hypothetical protein AQUCO_11000006v1 [Aquilegia coerulea]	PARN_ARATH RecName: Full=Poly(A)-specific ribonuclease PARN; EC=3.1.13.4; AltName: Full=Polyadenylate-specific ribonuclease; Short=AtPARN; AltName: Full=Protein ABA hypersensitive germination 2;	A0A2G5C437_AQUCA SubName: Full=Uncharacterized protein {ECO:0000313|EMBL:PIA25587.1};	Poly(A)-specific exoribonuclease PARN	GO:0005737,cytoplasm; GO:0005739,mitochondrion; GO:0005634,nucleus; GO:0000175,3'-5'-exoribonuclease activity; GO:0043169,cation binding; GO:0046872,metal ion binding; GO:0004535,poly(A)-specific ribonuclease activity; GO:0003723,RNA binding; GO:0006952,defense response; GO:0006397,mRNA processing; GO:0009737,response to abscisic acid; GO:0006970,response to osmotic stress; GO:0009751,response to…	PF04857.23:CAF1 family ribonuclease	--	--	--
IFM89_034846	16.8245	9.2871	15.8876	2.7123	4.3087	3.9664	339	202	359	64	132	79	-2.01393	6.59329e-10	3.05592e-07	down	CM027380.1	107667034	107674529	+	IFM89_034846	--	K04077 chaperonin GroEL | (RefSeq) chaperonin CPN60-2, mitochondrial (A)	ko03018: RNA degradation	hypothetical protein IFM89_034846 [Coptis chinensis]	CH62_CUCMA RecName: Full=Chaperonin CPN60-2, mitochondrial; AltName: Full=HSP60-2; Flags: Precursor;	A0A835LX97_9MAGN RecName: Full=Peptidylprolyl isomerase {ECO:0000256|PROSITE-ProRule:PRU00277}; EC=5.2.1.8 {ECO:0000256|PROSITE-ProRule:PRU00277};	Mitochondrial chaperonin, Cpn60/Hsp60p	GO:0005739,mitochondrion; GO:0005524,ATP binding; GO:0140662,ATP-dependent protein folding chaperone; GO:0042026,protein refolding; GO:0000166,nucleotide binding; GO:0003674,molecular_function; GO:0005488,binding; GO:0017076,purine nucleotide binding; GO:0030554,adenyl nucleotide binding; GO:0032553,ribonucleotide binding; GO:0032555,purine ribonucleotide binding; GO:0032559,adenyl ribonucleotide…	PF00118.27:TCP-1/cpn60 chaperonin family	--	--	--
IFM89_027923	70.4286	83.264	53.6431	21.0164	28.3592	12.545	1488	1899	1271	520	911	262	-1.82537	8.7026e-10	3.80132e-07	down	CM027383.1	53316716	53321443	+	IFM89_027923	--	K03141 transcription initiation factor TFIIH subunit 1 | (RefSeq) general transcription and DNA repair factor IIH subunit TFB1-1-like isoform X1 (A)	ko03022: Basal transcription factors; ko03420: Nucleotide excision repair	hypothetical protein IFM89_027923 [Coptis chinensis]	TFB1A_ARATH RecName: Full=General transcription and DNA repair factor IIH subunit TFB1-1; Short=AtTFB1-1 {ECO:0000303|PubMed:15645454}; Short=TFIIH subunit TFB1-1; AltName: Full=RNA polymerase II transcription factor B subunit 1-1;	A0A835HHJ6_9MAGN SubName: Full=Uncharacterized protein {ECO:0000313|EMBL:KAF9598489.1};	--	GO:0000439,transcription factor TFIIH core complex; GO:0005675,transcription factor TFIIH holo complex; GO:0006281,DNA repair; GO:0006289,nucleotide-excision repair; GO:0070816,phosphorylation of RNA polymerase II C-terminal domain; GO:0006360,transcription by RNA polymerase I; GO:0006366,transcription by RNA polymerase II; GO:0006139,nucleobase-containing compound metabolic process; GO:0006259,D…	PF03000.17:NPH3 family	--	--	--
IFM89_016410	6.2774	7.2109	6.4373	17.1531	19.281	14.8601	100	124	115	320	467	234	1.28262	8.93056e-10	3.80132e-07	up	CM027383.1	981182	982836	-	IFM89_016410	--	K00430 peroxidase [EC:1.11.1.7] | (RefSeq) peroxidase N (A)	ko00940: Phenylpropanoid biosynthesis; ko01100: Metabolic pathways; ko01110: Biosynthesis of secondary metabolites	hypothetical protein IFM89_016410 [Coptis chinensis]	PERN_ARMRU RecName: Full=Peroxidase N; EC=1.11.1.7; AltName: Full=Neutral peroxidase; Flags: Precursor;	A0A835HDF4_9MAGN RecName: Full=Peroxidase {ECO:0000256|RuleBase:RU362060}; EC=1.11.1.7 {ECO:0000256|RuleBase:RU362060};	--	GO:0005576,extracellular region; GO:0020037,heme binding; GO:0046872,metal ion binding; GO:0004601,peroxidase activity; GO:0042744,hydrogen peroxide catabolic process; GO:0006979,response to oxidative stress; GO:0003674,molecular_function; GO:0005488,binding; GO:0046906,tetrapyrrole binding; GO:0097159,organic cyclic compound binding; GO:1901363,heterocyclic compound binding; GO:0043167,ion bindi…	PF00141.26:Peroxidase	--	--	--
IFM89_030593	3.054	3.9132	4.8357	10.7236	17.1012	11.6938	107	148	190	440	911	405	1.66095	1.80553e-09	6.97371e-07	up	CM027382.1	72278869	72283469	-	IFM89_030593	--	K00276 primary-amine oxidase [EC:1.4.3.21] | (RefSeq) primary amine oxidase-like (A)	ko00260: Glycine, serine and threonine metabolism; ko00350: Tyrosine metabolism; ko00360: Phenylalanine metabolism; ko00410: beta-Alanine metabolism; ko00950: Isoquinoline alkaloid biosynthesis; ko00960: Tropane, piperidine and pyridine alkaloid biosynthesis; ko01100: Metabolic pathways; ko01110: Biosynthesis of secondary metabolites	hypothetical protein IFM89_030593 [Coptis chinensis]	CAOG1_ARATH RecName: Full=Amine oxidase [copper-containing] gamma 1 {ECO:0000303|PubMed:31862580}; Short=AtCuAO1 {ECO:0000303|PubMed:21471330, ECO:0000303|PubMed:23915037}; Short=AtCuAOgamma1 {ECO:0000303|PubMed:31862580}; Short=Copper amine oxidase 1 {ECO:0000303|PubMed:21471330}; EC=1.4.3.21 {ECO:0000269|PubMed:23915037}; AltName: Full=Primary amine oxidase 1 {ECO:0000305}; Flags: Precursor;	A0A835HKX0_9MAGN RecName: Full=Amine oxidase {ECO:0000256|RuleBase:RU000672}; EC=1.4.3.- {ECO:0000256|RuleBase:RU000672};	Copper amine oxidase	GO:0005615,extracellular space; GO:0052595,aliphatic amine oxidase activity; GO:0052594,aminoacetone:oxygen oxidoreductase(deaminating) activity; GO:0005507,copper ion binding; GO:0052596,phenethylamine:oxygen oxidoreductase (deaminating) activity; GO:0008131,primary amine oxidase activity; GO:0048038,quinone binding; GO:0052593,tryptamine:oxygen oxidoreductase (deaminating) activity; GO:0009738,…	PF01179.23:Copper amine oxidase, enzyme domain	--	--	--
novel.291	72.7934	65.7015	40.515	14.7264	20.1801	24.2431	1051	1024	656	249	443	346	-1.68047	1.89072e-09	7.16765e-07	down	CM027377.1	26262009	26263135	+	--	--	--	--	--	--	--	--	--	--	--	--	--
IFM89_005116	27.0889	61.8269	21.6659	6.742	7.1725	9.8849	621	1530	557	181	250	224	-2.30173	2.79434e-09	9.71361e-07	down	CM027378.1	86537963	86540382	+	IFM89_005116	--	K00847 fructokinase [EC:2.7.1.4] | (RefSeq) fructokinase-2-like (A)	ko00051: Fructose and mannose metabolism; ko00500: Starch and sucrose metabolism; ko00520: Amino sugar and nucleotide sugar metabolism; ko01100: Metabolic pathways; ko01110: Biosynthesis of secondary metabolites; ko01250: Biosynthesis of nucleotide sugars	hypothetical protein IFM89_005116 [Coptis chinensis]	SCRK2_ORYSI RecName: Full=Fructokinase-2; EC=2.7.1.4; AltName: Full=Fructokinase II; AltName: Full=OsFKII;	A0A835M7C0_9MAGN RecName: Full=PfkB domain-containing protein {ECO:0000259|Pfam:PF00294};	Ribokinase	GO:0005524,ATP binding; GO:0008865,fructokinase activity; GO:0019252,starch biosynthetic process; GO:0000166,nucleotide binding; GO:0003674,molecular_function; GO:0005488,binding; GO:0017076,purine nucleotide binding; GO:0030554,adenyl nucleotide binding; GO:0032553,ribonucleotide binding; GO:0032555,purine ribonucleotide binding; GO:0032559,adenyl ribonucleotide binding; GO:0035639,purine ribonu…	PF00294.27:pfkB family carbohydrate kinase	--	--	--
IFM89_008715	539.994	662.512	531.207	226.742	286.377	348.803	8169	10819	9012	4017	6587	5216	-1.09103	2.9159e-09	9.81215e-07	down	CM027385.1	66683171	66684884	-	IFM89_008715	--	K08901 photosystem II oxygen-evolving enhancer protein 3 | (RefSeq) oxygen-evolving enhancer protein 3-2, chloroplastic-like (A)	ko00195: Photosynthesis; ko01100: Metabolic pathways	hypothetical protein IFM89_008715 [Coptis chinensis]	PSBQ_SPIOL RecName: Full=Oxygen-evolving enhancer protein 3, chloroplastic; Short=OEE3; AltName: Full=16 kDa subunit of oxygen evolving system of photosystem II; AltName: Full=OEC 16 kDa subunit; Flags: Precursor;	A0A835H054_9MAGN SubName: Full=Uncharacterized protein {ECO:0000313|EMBL:KAF9588298.1};	--	GO:0009535,chloroplast thylakoid membrane; GO:0019898,extrinsic component of membrane; GO:0009654,photosystem II oxygen evolving complex; GO:0005509,calcium ion binding; GO:0015979,photosynthesis; GO:0003674,molecular_function; GO:0005488,binding; GO:0043167,ion binding; GO:0043169,cation binding; GO:0046872,metal ion binding; GO:0008150,biological_process; GO:0008152,metabolic process; GO:000998…	PF05757.14:Oxygen evolving enhancer protein 3 (PsbQ)	--	--	--
novel.5547	60.6714	70.4368	47.2076	24.149	22.2689	30.3916	620	777	541	289	346	307	-1.30161	2.91678e-09	9.81215e-07	down	CM027383.1	3213248	3213884	.	--	--	--	--	hypothetical protein BVC80_9055g9 [Macleaya cordata]	--	A0A200R9I5_9MAGN SubName: Full=Uncharacterized protein {ECO:0000313|EMBL:OVA19389.1};	--	--	--	--	--	--
IFM89_004627	220.176	203.506	164.838	82.858	99.6012	118.514	5330	5318	4475	2349	3666	2836	-1.0503	3.00467e-09	9.94735e-07	down	CM027384.1	14531462	14535971	+	IFM89_004627	--	--	--	hypothetical protein IFM89_004627 [Coptis chinensis]	AFP3_ARATH RecName: Full=Ninja-family protein AFP3; AltName: Full=ABI five-binding protein 3; Short=ABI5-binding protein 3;	A0A835H4S1_9MAGN RecName: Full=Ninja-family protein {ECO:0000256|RuleBase:RU369029}; AltName: Full=ABI-binding protein {ECO:0000256|RuleBase:RU369029};	--	GO:0005634,nucleus; GO:0045892,negative regulation of DNA-templated transcription; GO:0009737,response to abscisic acid; GO:0007165,signal transduction; GO:0006139,nucleobase-containing compound metabolic process; GO:0006351,DNA-templated transcription; GO:0006355,regulation of DNA-templated transcription; GO:0006725,cellular aromatic compound metabolic process; GO:0006807,nitrogen compound metab…	PF07897.14:Ethylene-responsive binding factor-associated repression	--	--	--
IFM89_014570	2.8755	3.4334	3.2194	8.4576	6.9556	8.436	90	116	113	310	331	261	1.23578	3.29364e-09	1.05685e-06	up	CM027385.1	56571103	56573462	+	IFM89_014570	--	--	--	hypothetical protein IFM89_014570 [Coptis chinensis]	TCP4_ARATH RecName: Full=Transcription factor TCP4; AltName: Full=Protein MATERNAL EFFECT EMBRYO ARREST 35;	A0A835GXH8_9MAGN RecName: Full=TCP domain-containing protein {ECO:0000259|PROSITE:PS51369};	--	GO:0005634,nucleus; GO:0003677,DNA binding; GO:0001216,DNA-binding transcription activator activity; GO:0003700,DNA-binding transcription factor activity; GO:0043565,sequence-specific DNA binding; GO:1990837,sequence-specific double-stranded DNA binding; GO:0048825,cotyledon development; GO:0048826,cotyledon morphogenesis; GO:0009793,embryo development ending in seed dormancy; GO:0048366,leaf dev…	PF03634.16:TCP family transcription factor	TCP	TF	TCP
novel.2125	1.3561	6.3231	2.1766	0.0772	0	0.0457	30	151	54	2	0	1	-6.51599	4.72725e-09	1.45149e-06	down	CM027379.1	24245259	24247881	+	--	--	K23286 neurobeachin-like protein 1/2 | (RefSeq) predicted protein (A)	--	hypothetical protein IFM89_022420 [Coptis chinensis]	BCHB_ARATH RecName: Full=BEACH domain-containing protein B {ECO:0000303|PubMed:25618824}; AltName: Full=BEACH-domain homolog B {ECO:0000305};	A0A835I377_9MAGN SubName: Full=Uncharacterized protein {ECO:0000313|EMBL:KAF9610456.1};	Kinase A-anchor protein Neurobeachin and related BEACH and WD40 repeat proteins	GO:0005739,mitochondrion; GO:0005575,cellular_component; GO:0005622,intracellular anatomical structure; GO:0005737,cytoplasm; GO:0043226,organelle; GO:0043227,membrane-bounded organelle; GO:0043229,intracellular organelle; GO:0043231,intracellular membrane-bounded organelle; GO:0110165,cellular anatomical entity	PF02138.21:Beige/BEACH domain	--	--	--
IFM89_021560	25.6435	32.1087	56.5987	137.279	108.621	118.971	947	1280	2344	5937	6099	4343	1.58894	4.92791e-09	1.48959e-06	up	CM027379.1	22270978	22275041	+	IFM89_021560	--	K00058 D-3-phosphoglycerate dehydrogenase / 2-oxoglutarate reductase [EC:1.1.1.95 1.1.1.399] | (RefSeq) D-3-phosphoglycerate dehydrogenase 3, chloroplastic-like (A)	ko00260: Glycine, serine and threonine metabolism; ko00270: Cysteine and methionine metabolism; ko01100: Metabolic pathways; ko01110: Biosynthesis of secondary metabolites; ko01200: Carbon metabolism; ko01230: Biosynthesis of amino acids	hypothetical protein IFM89_021560 [Coptis chinensis]	SERA1_ARATH RecName: Full=D-3-phosphoglycerate dehydrogenase 1, chloroplastic; EC=1.1.1.95 {ECO:0000269|PubMed:24368794}; AltName: Full=Protein EMBRYO SAC DEVELOPMENT ARREST 9; Flags: Precursor;	A0A835ICH3_9MAGN RecName: Full=ACT domain-containing protein {ECO:0000259|PROSITE:PS51671};	D-3-phosphoglycerate dehydrogenase, D-isomer-specific 2-hydroxy acid dehydrogenase superfamily	GO:0009507,chloroplast; GO:0009570,chloroplast stroma; GO:0005739,mitochondrion; GO:0005886,plasma membrane; GO:0009536,plastid; GO:0005524,ATP binding; GO:0051287,NAD binding; GO:0004617,phosphoglycerate dehydrogenase activity; GO:0009793,embryo development ending in seed dormancy; GO:0006564,L-serine biosynthetic process; GO:0009561,megagametogenesis; GO:0009555,pollen development; GO:0000096,s…	PF02826.22:D-isomer specific 2-hydroxyacid dehydrogenase, NAD binding domain	--	--	--
novel.3956	2.5317	4.1433	2.107	0.5765	0.6475	0.4838	90	159	84	24	35	17	-2.43864	6.20287e-09	1.72498e-06	down	CM027381.1	1993956	1997678	-	--	--	no KO assigned | (RefSeq) probable protein S-acyltransferase 7 (A)	--	probable protein S-acyltransferase 7 [Telopea speciosissima]	ZDHC9_ARATH RecName: Full=Probable protein S-acyltransferase 7; EC=2.3.1.225; AltName: Full=Probable palmitoyltransferase At3g26935; AltName: Full=Zinc finger DHHC domain-containing protein At3g26935;	A0A2G5CS49_AQUCA RecName: Full=S-acyltransferase {ECO:0000256|RuleBase:RU079119}; EC=2.3.1.225 {ECO:0000256|RuleBase:RU079119}; AltName: Full=Palmitoyltransferase {ECO:0000256|RuleBase:RU079119};	DHHC-type Zn-finger proteins	GO:0005829,cytosol; GO:0005783,endoplasmic reticulum; GO:0005794,Golgi apparatus; GO:0016021,integral component of membrane; GO:0005886,plasma membrane; GO:0019706,protein-cysteine S-palmitoyltransferase activity; GO:0018230,peptidyl-L-cysteine S-palmitoylation; GO:0006612,protein targeting to membrane; GO:0003674,molecular_function; GO:0003824,catalytic activity; GO:0016409,palmitoyltransferase …	--	--	--	--
IFM89_034180	220.666	270.377	203.44	95.8105	135.931	120.094	1593	2107	1647	810	1492	857	-1.06325	1.02249e-08	2.6995e-06	down	CM027379.1	52142114	52142665	-	IFM89_034180	--	K03686 molecular chaperone DnaJ | (RefSeq) chaperone protein DnaJ (A)	--	hypothetical protein IFM89_034180 [Coptis chinensis]	DNAJ8_ARATH RecName: Full=Chaperone protein dnaJ 8, chloroplastic; Short=AtDjC8; Short=AtJ8; Flags: Precursor;	A0A835IFS0_9MAGN RecName: Full=J domain-containing protein {ECO:0000259|PROSITE:PS50076};	Molecular chaperone (DnaJ superfamily)	GO:0009507,chloroplast; GO:0009570,chloroplast stroma; GO:0005634,nucleus; GO:0009416,response to light stimulus; GO:0008150,biological_process; GO:0009314,response to radiation; GO:0009628,response to abiotic stimulus; GO:0050896,response to stimulus; GO:0005575,cellular_component; GO:0005622,intracellular anatomical structure; GO:0005737,cytoplasm; GO:0009536,plastid; GO:0043226,organelle; GO:0…	PF00226.34:DnaJ domain	--	--	--
novel.3269	21.5171	23.8681	37.7152	7.6491	9.3536	10.4633	233	279	458	97	154	112	-1.68192	1.11596e-08	2.90413e-06	down	CM027380.1	24501987	24502661	.	--	--	K03834 tyrosine-specific transport protein | (RefSeq) tyrosine-specific transport protein-like (A)	--	hypothetical protein AQUCO_03600078v1 [Aquilegia coerulea]	FB187_ARATH RecName: Full=Putative F-box protein At3g25750;	A0A2G5CV81_AQUCA RecName: Full=DUF295 domain-containing protein {ECO:0000259|Pfam:PF03478};	--	--	PF03478.21:Protein of unknown function (DUF295)	--	--	--
IFM89_009525	12.9684	8.8427	10.7472	44.9948	25.3661	28.8233	269	198	250	1093	800	591	1.52112	1.12785e-08	2.90413e-06	up	CM027381.1	42867465	42871330	-	IFM89_009525	--	K01184 polygalacturonase [EC:3.2.1.15] | (RefSeq) polygalacturonase At1g48100 (A)	ko00040: Pentose and glucuronate interconversions; ko01100: Metabolic pathways	hypothetical protein IFM89_009525 [Coptis chinensis]	PGLR4_ARATH RecName: Full=Polygalacturonase At1g48100; Short=PG; EC=3.2.1.15; AltName: Full=Pectinase At1g48100; Flags: Precursor;	A0A835HU53_9MAGN SubName: Full=Uncharacterized protein {ECO:0000313|EMBL:KAF9604729.1};	--	GO:0005576,extracellular region; GO:0004650,polygalacturonase activity; GO:0005975,carbohydrate metabolic process; GO:0009831,plant-type cell wall modification involved in multidimensional cell growth; GO:0003674,molecular_function; GO:0003824,catalytic activity; GO:0004553,hydrolase activity, hydrolyzing O-glycosyl compounds; GO:0016787,hydrolase activity; GO:0016798,hydrolase activity, acting o…	PF00295.20:Glycosyl hydrolases family 28	--	--	--
IFM89_009131	178.626	190.046	153.143	72.824	90.8061	109.113	3347	3844	3218	1598	2587	2021	-1.01895	1.1574e-08	2.919e-06	down	CM027381.1	83476657	83479639	+	IFM89_009131	--	K00432 glutathione peroxidase [EC:1.11.1.9] | (RefSeq) probable glutathione peroxidase 5 (A)	ko00480: Glutathione metabolism; ko00590: Arachidonic acid metabolism; ko01100: Metabolic pathways	hypothetical protein IFM89_009131 [Coptis chinensis]	GPX5_ARATH RecName: Full=Probable glutathione peroxidase 5; EC=1.11.1.9;	A0A835HRV7_9MAGN RecName: Full=Glutathione peroxidase {ECO:0000256|RuleBase:RU000499};	Glutathione peroxidase	GO:0005829,cytosol; GO:0012505,endomembrane system; GO:0005783,endoplasmic reticulum; GO:0005886,plasma membrane; GO:0004602,glutathione peroxidase activity; GO:0004601,peroxidase activity; GO:0009793,embryo development ending in seed dormancy; GO:0006979,response to oxidative stress; GO:0003674,molecular_function; GO:0003824,catalytic activity; GO:0016209,antioxidant activity; GO:0016491,oxidore…	PF00255.22:Glutathione peroxidase	--	--	--
IFM89_022620	14.3659	14.4004	19.0631	54.6853	32.0392	38.8907	463	501	689	2064	1570	1239	1.30631	1.16161e-08	2.919e-06	up	CM027379.1	4341418	4346331	+	IFM89_022620	--	K01188 beta-glucosidase [EC:3.2.1.21] | (RefSeq) beta-glucosidase 24-like (A)	ko00460: Cyanoamino acid metabolism; ko00500: Starch and sucrose metabolism; ko00999: Biosynthesis of various plant secondary metabolites; ko01100: Metabolic pathways; ko01110: Biosynthesis of secondary metabolites	hypothetical protein IFM89_022620 [Coptis chinensis]	BGL13_ORYSJ RecName: Full=Beta-glucosidase 13; Short=Os4bglu13; EC=3.2.1.21; Flags: Precursor;	A0A835M0P2_9MAGN SubName: Full=Uncharacterized protein {ECO:0000313|EMBL:KAF9615293.1};	Beta-glucosidase, lactase phlorizinhydrolase, and related proteins	GO:0033907,beta-D-fucosidase activity; GO:0004565,beta-galactosidase activity; GO:0008422,beta-glucosidase activity; GO:0102483,scopolin beta-glucosidase activity; GO:0005975,carbohydrate metabolic process; GO:0003674,molecular_function; GO:0003824,catalytic activity; GO:0004553,hydrolase activity, hydrolyzing O-glycosyl compounds; GO:0016787,hydrolase activity; GO:0016798,hydrolase activity, act…	PF00232.21:Glycosyl hydrolase family 1	--	--	--
IFM89_032015	752.337	874.932	703.349	320.866	381.316	494.79	5576	7000	5846	2785	4297	3625	-1.04434	1.36515e-08	3.30608e-06	down	CM027385.1	34219563	34220024	-	IFM89_032015	--	K03122 transcription initiation factor TFIIA large subunit | (RefSeq) uncharacterized protein LOC114825099 (A)	ko03022: Basal transcription factors	hypothetical protein IFM89_032015 [Coptis chinensis]	--	A0A835H1V5_9MAGN RecName: Full=PB1 domain-containing protein {ECO:0000259|SMART:SM00666};	--	--	PF00564.27:PB1 domain	--	--	--
IFM89_020308	9.1998	7.4531	14.7539	35.1867	29.3795	28.8052	263	230	473	1178	1277	814	1.4868	1.37905e-08	3.30608e-06	up	CM027382.1	85940449	85951097	-	IFM89_020308	--	K00963 UTP--glucose-1-phosphate uridylyltransferase [EC:2.7.7.9] | (RefSeq) UTP--glucose-1-phosphate uridylyltransferase (A)	ko00040: Pentose and glucuronate interconversions; ko00052: Galactose metabolism; ko00500: Starch and sucrose metabolism; ko00520: Amino sugar and nucleotide sugar metabolism; ko01100: Metabolic pathways; ko01110: Biosynthesis of secondary metabolites; ko01240: Biosynthesis of cofactors; ko01250: Biosynthesis of nucleotide sugars	hypothetical protein IFM89_020308, partial [Coptis chinensis]	PGLR_VITVI RecName: Full=Probable polygalacturonase; Short=PG {ECO:0000250|UniProtKB:Q7M1E7}; EC=3.2.1.15; AltName: Full=Pectinase {ECO:0000250|UniProtKB:Q7M1E7};	A0A835HQZ4_9MAGN RecName: Full=Pectate_lyase_3 domain-containing protein {ECO:0000259|Pfam:PF12708}; Flags: Fragment;	--	GO:0016021,integral component of membrane; GO:0004650,polygalacturonase activity; GO:0005975,carbohydrate metabolic process; GO:0003674,molecular_function; GO:0003824,catalytic activity; GO:0004553,hydrolase activity, hydrolyzing O-glycosyl compounds; GO:0016787,hydrolase activity; GO:0016798,hydrolase activity, acting on glycosyl bonds; GO:0008150,biological_process; GO:0008152,metabolic process…	PF00295.20:Glycosyl hydrolases family 28	--	--	--
IFM89_021954	3.7989	3.133	5.4325	16.8526	13.5136	9.7953	164	146	263	852	887	418	1.61417	1.53511e-08	3.63838e-06	up	CM027383.1	357660	373300	-	IFM89_021954	--	K00454 lipoxygenase [EC:1.13.11.12] | (RefSeq) linoleate 13S-lipoxygenase 2-1, chloroplastic-like (A)	ko00591: Linoleic acid metabolism; ko00592: alpha-Linolenic acid metabolism; ko01100: Metabolic pathways; ko01110: Biosynthesis of secondary metabolites	hypothetical protein IFM89_021954 [Coptis chinensis]	LOX21_SOLTU RecName: Full=Linoleate 13S-lipoxygenase 2-1, chloroplastic {ECO:0000303|PubMed:8702864}; EC=1.13.11.12 {ECO:0000269|PubMed:11675388, ECO:0000269|PubMed:8702864}; AltName: Full=Lipoxygenase 2-1 {ECO:0000303|PubMed:8702864}; Flags: Precursor;	A0A835HEI1_9MAGN RecName: Full=Lipoxygenase {ECO:0000256|RuleBase:RU003975}; EC=1.13.11.- {ECO:0000256|RuleBase:RU003975};	--	GO:0009570,chloroplast stroma; GO:0009534,chloroplast thylakoid; GO:0016165,linoleate 13S-lipoxygenase activity; GO:0046872,metal ion binding; GO:0016702,oxidoreductase activity, acting on single donors with incorporation of molecular oxygen, incorporation of two atoms of oxygen; GO:0006633,fatty acid biosynthetic process; GO:0010597,green leaf volatile biosynthetic process; GO:0034440,lipid oxid…	PF00305.22:Lipoxygenase	--	--	--
IFM89_010682	190.821	175.397	268.8	606.239	446.619	430.374	3600	3572	5687	13394	12811	8026	1.13851	1.72112e-08	3.94476e-06	up	CM027383.1	38476548	38477723	-	IFM89_010682	--	K00789 S-adenosylmethionine synthetase [EC:2.5.1.6] | (RefSeq) S-adenosylmethionine synthase 1 (A)	ko00270: Cysteine and methionine metabolism; ko00999: Biosynthesis of various plant secondary metabolites; ko01100: Metabolic pathways; ko01110: Biosynthesis of secondary metabolites; ko01230: Biosynthesis of amino acids; ko01240: Biosynthesis of cofactors	hypothetical protein IFM89_010682 [Coptis chinensis]	METK1_VITVI RecName: Full=S-adenosylmethionine synthase 1; Short=AdoMet synthase 1; EC=2.5.1.6 {ECO:0000250|UniProtKB:Q96551}; AltName: Full=Methionine adenosyltransferase 1; Short=MAT 1;	A0A835HE09_9MAGN RecName: Full=S-adenosylmethionine synthase {ECO:0000256|RuleBase:RU000541}; EC=2.5.1.6 {ECO:0000256|RuleBase:RU000541};	S-adenosylmethionine synthetase	GO:0005829,cytosol; GO:0005524,ATP binding; GO:0046872,metal ion binding; GO:0004478,methionine adenosyltransferase activity; GO:0006730,one-carbon metabolic process; GO:0006556,S-adenosylmethionine biosynthetic process; GO:0000166,nucleotide binding; GO:0003674,molecular_function; GO:0005488,binding; GO:0017076,purine nucleotide binding; GO:0030554,adenyl nucleotide binding; GO:0032553,ribonucle…	PF02773.19:S-adenosylmethionine synthetase, C-terminal domain	--	--	--
IFM89_000111	78.7681	119.459	95.0009	36.547	53.2147	48.1169	2133	3492	2885	1159	2191	1288	-1.17123	1.85248e-08	4.15452e-06	down	CM027380.1	45801138	45804335	-	IFM89_000111	--	--	--	hypothetical protein IFM89_000111 [Coptis chinensis]	IQD33_ARATH RecName: Full=Protein IQ-DOMAIN 33 {ECO:0000303|PubMed:16368012}; Short=AtIQD33 {ECO:0000303|PubMed:16368012};	A0A835LYG0_9MAGN SubName: Full=Uncharacterized protein {ECO:0000313|EMBL:KAF9607764.1};	--	GO:0005634,nucleus; GO:0005516,calmodulin binding; GO:0003674,molecular_function; GO:0005488,binding; GO:0005515,protein binding; GO:0005575,cellular_component; GO:0005622,intracellular anatomical structure; GO:0043226,organelle; GO:0043227,membrane-bounded organelle; GO:0043229,intracellular organelle; GO:0043231,intracellular membrane-bounded organelle; GO:0110165,cellular anatomical entity	PF00612.30:IQ calmodulin-binding motif	--	--	--
IFM89_003004	2.7551	7.7278	5.1865	0.9149	1.0822	0.7742	72	218	152	28	43	20	-2.57783	2.27872e-08	4.95075e-06	down	CM027377.1	719666	727743	+	IFM89_003004	--	K13096 splicing factor 4 | (RefSeq) SURP and G-patch domain-containing protein 1-like protein (A)	--	hypothetical protein IFM89_003004 [Coptis chinensis]	SUGP1_ARATH RecName: Full=SURP and G-patch domain-containing protein 1-like protein; AltName: Full=Splicing factor 4-like protein; Short=SF4-like protein;	A0A835IQT7_9MAGN SubName: Full=Uncharacterized protein {ECO:0000313|EMBL:KAF9623420.1};	Predicted RNA-binding protein, contains SWAP and G-patch domains	GO:0005654,nucleoplasm; GO:0003723,RNA binding; GO:0006397,mRNA processing; GO:0008380,RNA splicing; GO:0003674,molecular_function; GO:0003676,nucleic acid binding; GO:0005488,binding; GO:0097159,organic cyclic compound binding; GO:1901363,heterocyclic compound binding; GO:0006139,nucleobase-containing compound metabolic process; GO:0006396,RNA processing; GO:0006725,cellular aromatic compound me…	PF00098.26:Zinc knuckle	--	--	--
IFM89_009002	3.8685	4.5073	9.5664	22.1017	22.6629	24.7318	97	122	269	649	864	613	1.86844	3.37723e-08	6.90577e-06	up	CM027382.1	19648818	19658674	-	IFM89_009002	--	K13051 L-asparaginase / beta-aspartyl-peptidase [EC:3.5.1.1 3.4.19.5] | (RefSeq) probable isoaspartyl peptidase/L-asparaginase 2 (A)	ko00250: Alanine, aspartate and glutamate metabolism; ko00460: Cyanoamino acid metabolism; ko01100: Metabolic pathways; ko01110: Biosynthesis of secondary metabolites	hypothetical protein IFM89_009002 [Coptis chinensis]	ASPGB_ARATH RecName: Full=Probable isoaspartyl peptidase/L-asparaginase 2; EC=3.4.19.5; AltName: Full=L-asparagine amidohydrolase 2; Contains: RecName: Full=Isoaspartyl peptidase/L-asparaginase 2 subunit alpha; Contains: RecName: Full=Isoaspartyl peptidase/L-asparaginase 2 subunit beta; Flags: Precursor;	A0A835HIS9_9MAGN SubName: Full=Uncharacterized protein {ECO:0000313|EMBL:KAF9600406.1};	Asparaginase	GO:0005737,cytoplasm; GO:0004067,asparaginase activity; GO:0008798,beta-aspartyl-peptidase activity; GO:0016540,protein autoprocessing; GO:0003674,molecular_function; GO:0003824,catalytic activity; GO:0016787,hydrolase activity; GO:0016810,hydrolase activity, acting on carbon-nitrogen (but not peptide) bonds; GO:0016811,hydrolase activity, acting on carbon-nitrogen (but not peptide) bonds, in lin…	PF01112.21:Asparaginase	--	--	--
IFM89_036586	5.9781	7.5811	8.436	22.5501	16.1472	18.143	103	141	163	455	423	309	1.28175	3.93005e-08	7.73292e-06	up	CM027383.1	75738240	75739313	-	IFM89_036586	--	K09422 transcription factor MYB, plant | (RefSeq) transcription factor AS1-like (A)	--	hypothetical protein IFM89_036586 [Coptis chinensis]	AS1_ARATH RecName: Full=Transcription factor AS1 {ECO:0000303|PubMed:11140682}; AltName: Full=Myb-related protein 91 {ECO:0000303|PubMed:9839469}; Short=AtMYB91 {ECO:0000303|PubMed:9839469}; AltName: Full=Protein ASYMMETRIC LEAVES 1 {ECO:0000303|PubMed:11140682}; AltName: Full=Protein PHANTASTICA {ECO:0000303|PubMed:10102816}; Short=AtPHAN {ECO:0000303|PubMed:10102816};	A0A835LKT9_9MAGN SubName: Full=Uncharacterized protein {ECO:0000313|EMBL:KAF9599288.1};	Transcription factor, Myb superfamily	GO:0000793,condensed chromosome; GO:0005730,nucleolus; GO:0005634,nucleus; GO:0003677,DNA binding; GO:0003700,DNA-binding transcription factor activity; GO:0042802,identical protein binding; GO:0042803,protein homodimerization activity; GO:0000976,transcription cis-regulatory region binding; GO:0008356,asymmetric cell division; GO:0042742,defense response to bacterium; GO:0050832,defense response…	PF00249.34:Myb-like DNA-binding domain	MYB	TF	MYB->MYB
novel.32	0.9552	4.9159	9.7478	0.2115	0.3257	0.3937	27	150	309	7	14	11	-4.15512	4.08404e-08	7.88711e-06	down	CM027377.1	3068904	3070869	-	--	--	--	--	--	--	--	--	--	--	--	--	--
IFM89_035040	8.5748	8.6342	9.5744	19.2283	17.8998	20.2154	115	125	144	302	365	268	1.01175	4.16177e-08	7.96349e-06	up	CM027384.1	54818180	54821439	-	IFM89_035040	--	K01859 chalcone isomerase [EC:5.5.1.6] | (RefSeq) chalcone--flavonone isomerase (A)	ko00941: Flavonoid biosynthesis; ko01100: Metabolic pathways; ko01110: Biosynthesis of secondary metabolites	hypothetical protein IFM89_035040 [Coptis chinensis]	CFI_PYRCO RecName: Full=Chalcone--flavanone isomerase; Short=Chalcone isomerase; EC=5.5.1.6;	A0A835LKF7_9MAGN RecName: Full=Chalcone-flavonone isomerase family protein {ECO:0000256|RuleBase:RU361158};	--	GO:0045430,chalcone isomerase activity; GO:0009813,flavonoid biosynthetic process; GO:0003674,molecular_function; GO:0003824,catalytic activity; GO:0016853,isomerase activity; GO:0016872,intramolecular lyase activity; GO:0008150,biological_process; GO:0008152,metabolic process; GO:0009058,biosynthetic process; GO:0009812,flavonoid metabolic process; GO:0071704,organic substance metabolic process;…	PF02431.18:Chalcone-flavanone isomerase	--	--	--
IFM89_020846	33.0358	40.2186	35.2494	13.9527	21.2791	19.59	1114	1464	1333	551	1091	653	-1.06679	4.94067e-08	9.28355e-06	down	CM027377.1	1496037	1506171	+	IFM89_020846	--	--	--	hypothetical protein IFM89_020846 [Coptis chinensis]	MACP1_ARATH RecName: Full=MACPF domain-containing protein At1g14780;	A0A835IWT9_9MAGN RecName: Full=MACPF domain-containing protein {ECO:0000259|PROSITE:PS51412};	--	GO:0009626,plant-type hypersensitive response; GO:2000031,regulation of salicylic acid mediated signaling pathway; GO:0002376,immune system process; GO:0006950,response to stress; GO:0006952,defense response; GO:0006955,immune response; GO:0008150,biological_process; GO:0008219,cell death; GO:0009605,response to external stimulus; GO:0009607,response to biotic stimulus; GO:0009987,cellular proces…	PF01823.22:MAC/Perforin domain	--	--	--
IFM89_030396	17.1054	33.2474	28.2602	81.3655	63.671	68.1028	326	684	604	1816	1845	1283	1.35268	5.19757e-08	9.59343e-06	up	CM027381.1	2633296	2635915	+	IFM89_030396	--	K00660 chalcone synthase [EC:2.3.1.74] | (RefSeq) chalcone synthase-like (A)	ko00941: Flavonoid biosynthesis; ko00960: Tropane, piperidine and pyridine alkaloid biosynthesis; ko01100: Metabolic pathways; ko01110: Biosynthesis of secondary metabolites; ko04712: Circadian rhythm - plant	hypothetical protein IFM89_030396 [Coptis chinensis]	CHSY_VITVI RecName: Full=Chalcone synthase; EC=2.3.1.74; AltName: Full=Naringenin-chalcone synthase;	A0A835HYY6_9MAGN SubName: Full=Uncharacterized protein {ECO:0000313|EMBL:KAF9606977.1};	--	GO:0102128,chalcone synthase activity; GO:0016210,naringenin-chalcone synthase activity; GO:0009813,flavonoid biosynthetic process; GO:0003674,molecular_function; GO:0003824,catalytic activity; GO:0016740,transferase activity; GO:0016746,acyltransferase activity; GO:0016747,acyltransferase activity, transferring groups other than amino-acyl groups; GO:0008150,biological_process; GO:0008152,metabo…	PF00195.22:Chalcone and stilbene synthases, N-terminal domain	--	--	--
IFM89_017557	10.3892	15.5893	11.1459	4.3895	4.7333	5.5834	192	311	231	95	133	102	-1.42292	6.17538e-08	1.11034e-05	down	CM027381.1	84265692	84266843	+	IFM89_017557	--	K22683 aspartyl protease family protein [EC:3.4.23.-] | (RefSeq) aspartyl protease family protein 2-like (A)	--	hypothetical protein IFM89_017557 [Coptis chinensis]	GIP2_NICBE RecName: Full=Probable aspartic proteinase GIP2 {ECO:0000305}; EC=3.4.23.- {ECO:0000305}; AltName: Full=Glucanase inhibitor protein 2 {ECO:0000303|PubMed:28082413}; Short=NbGIP2 {ECO:0000303|PubMed:28082413}; Flags: Precursor;	A0A835HWB1_9MAGN RecName: Full=Peptidase A1 domain-containing protein {ECO:0000259|PROSITE:PS51767};	Aspartyl protease	GO:0048046,apoplast; GO:0004190,aspartic-type endopeptidase activity; GO:0006952,defense response; GO:0006508,proteolysis; GO:0003674,molecular_function; GO:0003824,catalytic activity; GO:0004175,endopeptidase activity; GO:0008233,peptidase activity; GO:0016787,hydrolase activity; GO:0070001,aspartic-type peptidase activity; GO:0140096,catalytic activity, acting on a protein; GO:0006950,response …	PF14543.9:Xylanase inhibitor N-terminal	--	--	--
IFM89_029133	9.3144	10.3135	11.8443	26.967	20.0458	22.5254	169	202	241	573	553	404	1.0566	7.17191e-08	1.25231e-05	up	CM027378.1	110523156	110524668	+	IFM89_029133	--	K14505 cyclin D3, plant | (RefSeq) cyclin-D3-1-like (A)	ko04075: Plant hormone signal transduction	hypothetical protein IFM89_029133 [Coptis chinensis]	CCD33_ARATH RecName: Full=Cyclin-D3-3; AltName: Full=G1/S-specific cyclin-D3-3; Short=CycD3;3;	A0A835IUM8_9MAGN RecName: Full=Cyclin N-terminal domain-containing protein {ECO:0000259|PROSITE:PS00292};	G1/S-specific cyclin D	GO:0000307,cyclin-dependent protein kinase holoenzyme complex; GO:0005737,cytoplasm; GO:0005634,nucleus; GO:0016538,cyclin-dependent protein serine/threonine kinase regulator activity; GO:0051301,cell division; GO:0010444,guard mother cell differentiation; GO:0044772,mitotic cell cycle phase transition; GO:0000079,regulation of cyclin-dependent protein serine/threonine kinase activity; GO:0048316…	PF00134.26:Cyclin, N-terminal domain	--	--	--
IFM89_026642	68.4644	96.2425	60.4315	35.9462	36.7891	41.7671	1776	2695	1758	1092	1451	1071	-1.05984	7.20513e-08	1.25231e-05	down	CM027385.1	22640946	22645108	-	IFM89_026642	--	--	--	hypothetical protein IFM89_026642 [Coptis chinensis]	--	A0A835GY52_9MAGN SubName: Full=Uncharacterized protein {ECO:0000313|EMBL:KAF9589640.1};	--	--	--	--	--	--
IFM89_018251	381.241	492.038	470.156	1398.75	907.562	818.318	7645	10651	10573	32848	27671	16221	1.13104	7.48857e-08	1.28024e-05	up	CM027385.1	73474285	73476322	-	IFM89_018251	--	K00430 peroxidase [EC:1.11.1.7] | (RefSeq) peroxidase 42 (A)	ko00940: Phenylpropanoid biosynthesis; ko01100: Metabolic pathways; ko01110: Biosynthesis of secondary metabolites	hypothetical protein IFM89_018251 [Coptis chinensis]	PER42_ARATH RecName: Full=Peroxidase 42; Short=Atperox P42; EC=1.11.1.7; AltName: Full=ATP1a/ATP1b; AltName: Full=PRXR1; Flags: Precursor;	A0A835LE11_9MAGN RecName: Full=Peroxidase {ECO:0000256|RuleBase:RU362060}; EC=1.11.1.7 {ECO:0000256|RuleBase:RU362060};	--	GO:0005576,extracellular region; GO:0009505,plant-type cell wall; GO:0020037,heme binding; GO:0046872,metal ion binding; GO:0004601,peroxidase activity; GO:0042744,hydrogen peroxide catabolic process; GO:0006979,response to oxidative stress; GO:0048511,rhythmic process; GO:0003674,molecular_function; GO:0005488,binding; GO:0046906,tetrapyrrole binding; GO:0097159,organic cyclic compound binding; …	PF00141.26:Peroxidase	--	--	--
IFM89_003532	759.381	1012.77	824.276	327.672	497.293	491.745	7419	10681	9031	3749	7387	4749	-1.06191	8.47567e-08	1.42562e-05	down	CM027385.1	18343744	18345529	-	IFM89_003532	--	--	--	hypothetical protein IFM89_003532, partial [Coptis chinensis]	HIP7_ARATH RecName: Full=Heavy metal-associated isoprenylated plant protein 7 {ECO:0000303|PubMed:21072340, ECO:0000303|PubMed:23368984}; Short=AtHIP07 {ECO:0000303|PubMed:21072340, ECO:0000303|PubMed:23368984}; AltName: Full=Farnesylated protein 3 {ECO:0000303|PubMed:8837031}; Short=AtFP3 {ECO:0000303|PubMed:8837031}; Flags: Precursor;	A0A835LD85_9MAGN SubName: Full=Uncharacterized protein {ECO:0000313|EMBL:KAF9587514.1}; Flags: Fragment;	Copper chaperone	GO:0046914,transition metal ion binding; GO:0046916,cellular transition metal ion homeostasis; GO:0003674,molecular_function; GO:0005488,binding; GO:0043167,ion binding; GO:0043169,cation binding; GO:0046872,metal ion binding; GO:0006873,cellular ion homeostasis; GO:0006875,cellular metal ion homeostasis; GO:0008150,biological_process; GO:0009987,cellular process; GO:0019725,cellular homeostasis;…	PF00403.29:Heavy-metal-associated domain	--	--	--
IFM89_024851	0.3245	0.0694	0.0445	2.4941	1.5926	1.8688	13	3	2	117	97	74	3.70046	1.08077e-07	1.74741e-05	up	CM027382.1	93018409	93026495	+	IFM89_024851	--	K10999 cellulose synthase A [EC:2.4.1.12] | (RefSeq) cellulose synthase A catalytic subunit 9 [UDP-forming] (A)	--	hypothetical protein IFM89_024851 [Coptis chinensis]	CSLG3_ARATH RecName: Full=Cellulose synthase-like protein G3; Short=AtCslG3; EC=2.4.1.-;	A0A835HMB1_9MAGN SubName: Full=Uncharacterized protein {ECO:0000313|EMBL:KAF9602084.1};	--	GO:0000139,Golgi membrane; GO:0016021,integral component of membrane; GO:0005886,plasma membrane; GO:0016760,cellulose synthase (UDP-forming) activity; GO:0051753,mannan synthase activity; GO:0071555,cell wall organization; GO:0030244,cellulose biosynthetic process; GO:0009833,plant-type primary cell wall biogenesis; GO:0003674,molecular_function; GO:0003824,catalytic activity; GO:0008194,UDP-gly…	PF03552.17:Cellulose synthase	--	--	--
IFM89_030957	103.289	114.139	100.703	33.3454	41.8116	65.2744	3256	3884	3560	1231	2004	2034	-1.26238	1.29687e-07	2.00362e-05	down	CM027377.1	78931482	78933446	-	IFM89_030957	--	K10268 F-box and leucine-rich repeat protein 2/20 | (RefSeq) F-box/LRR-repeat protein 3-like (A)	--	hypothetical protein IFM89_030957 [Coptis chinensis]	MAX2A_PETHY RecName: Full=F-box/LRR-repeat MAX2 homolog A; AltName: Full=F-box and leucine-rich repeat MAX2 homolog A;	A0A835MB59_9MAGN SubName: Full=Uncharacterized protein {ECO:0000313|EMBL:KAF9626110.1};	--	--	PF12799.10:Leucine Rich repeats (2 copies)	--	--	--
IFM89_006261	25.9341	33.951	50.3778	181.935	77.8899	116.883	835	1180	1819	6860	3813	3720	1.68493	1.69986e-07	2.51145e-05	up	CM027385.1	37276167	37278664	+	IFM89_006261	--	K00422 polyphenol oxidase [EC:1.10.3.1] | (RefSeq) polyphenol oxidase, chloroplastic-like (A)	ko00350: Tyrosine metabolism; ko00950: Isoquinoline alkaloid biosynthesis; ko01100: Metabolic pathways; ko01110: Biosynthesis of secondary metabolites	hypothetical protein IFM89_006261 [Coptis chinensis]	PPO_MALDO RecName: Full=Polyphenol oxidase, chloroplastic; Short=PPO; EC=1.10.3.1; AltName: Full=Catechol oxidase; Flags: Precursor;	A0A835LHW4_9MAGN RecName: Full=Tyrosinase_Cu-bd domain-containing protein {ECO:0000259|PROSITE:PS00498};	--	GO:0009543,chloroplast thylakoid lumen; GO:0004097,catechol oxidase activity; GO:0046872,metal ion binding; GO:0046148,pigment biosynthetic process; GO:0003674,molecular_function; GO:0003824,catalytic activity; GO:0004497,monooxygenase activity; GO:0016491,oxidoreductase activity; GO:0016679,oxidoreductase activity, acting on diphenols and related substances as donors; GO:0016682,oxidoreductase a…	PF12143.11:Protein of unknown function (DUF_B2219)	--	--	--
IFM89_018100	19.1592	15.1238	10.4071	5.0117	5.9456	5.0503	284	242	173	87	134	74	-1.56066	1.82647e-07	2.62721e-05	down	CM027379.1	18531029	18541842	+	IFM89_018100	--	K19996 phosphatidylinositol transfer protein SFH5 | (RefSeq) patellin-3 (A)	--	hypothetical protein IFM89_018100 [Coptis chinensis]	PATL3_ARATH RecName: Full=Patellin-3;	A0A835M2U3_9MAGN RecName: Full=CRAL-TRIO domain-containing protein {ECO:0000259|PROSITE:PS50191};	Phosphatidylinositol transfer protein SEC14 and related proteins	GO:0005737,cytoplasm; GO:0005886,plasma membrane; GO:0008289,lipid binding; GO:0007049,cell cycle; GO:0051301,cell division; GO:0003674,molecular_function; GO:0005488,binding; GO:0008150,biological_process; GO:0009987,cellular process; GO:0005575,cellular_component; GO:0005622,intracellular anatomical structure; GO:0110165,cellular anatomical entity; GO:0016020,membrane; GO:0071944,cell periphery	PF00650.23:CRAL/TRIO domain	--	--	--
IFM89_008462	2.7649	2.3617	2.9137	13.215	7.3683	6.9381	77	71	91	431	312	191	1.68829	1.96784e-07	2.73622e-05	up	CM027384.1	41634556	41637004	+	IFM89_008462	--	K24188 cytochrome P450 family 93 subfamily A [EC:1.14.-.-] | (RefSeq) cytochrome P450 93A3-like (A)	--	hypothetical protein IFM89_008462 [Coptis chinensis]	C9B16_SOYBN RecName: Full=Cytochrome P450 93B16 {ECO:0000305}; EC=1.14.19.76 {ECO:0000269|PubMed:20132953}; AltName: Full=Flavone synthase II {ECO:0000303|PubMed:20132953}; Short=GmFNSII {ECO:0000303|PubMed:20132953};	A0A835H4W5_9MAGN SubName: Full=Uncharacterized protein {ECO:0000313|EMBL:KAF9591812.1};	Cytochrome P450 CYP2 subfamily	GO:0016021,integral component of membrane; GO:0016020,membrane; GO:0020037,heme binding; GO:0005506,iron ion binding; GO:0016709,oxidoreductase activity, acting on paired donors, with incorporation or reduction of molecular oxygen, NAD(P)H as one donor, and incorporation of one atom of oxygen; GO:0016717,oxidoreductase activity, acting on paired donors, with oxidation of a pair of donors resultin…	PF00067.25:Cytochrome P450	--	--	--
IFM89_007767	59.3218	59.1993	86.7634	265.578	168.079	131.613	1890	2036	3100	9909	8142	4145	1.37454	2.0433e-07	2.82232e-05	up	CM027377.1	2879482	2881972	+	IFM89_007767	--	K05280 flavonoid 3'-monooxygenase [EC:1.14.14.82] | (RefSeq) flavonoid 3'-monooxygenase-like (A)	ko00941: Flavonoid biosynthesis; ko00944: Flavone and flavonol biosynthesis; ko01100: Metabolic pathways; ko01110: Biosynthesis of secondary metabolites	hypothetical protein IFM89_007767 [Coptis chinensis]	CYP1_CROXC RecName: Full=Flavonoid 3'-monooxygenase CYP75B137 {ECO:0000305}; EC=1.14.14.82 {ECO:0000269|PubMed:31004005}; AltName: Full=Cytochrome P450 1 {ECO:0000303|PubMed:31004005}; Short=CcCYP1 {ECO:0000303|PubMed:31004005}; AltName: Full=Cytochrome P450 75B137 {ECO:0000303|PubMed:31004005}; AltName: Full=Flavonoid 3'-hydroxylase CYP75B137 {ECO:0000305};	A0A835MEF9_9MAGN SubName: Full=Uncharacterized protein {ECO:0000313|EMBL:KAF9624069.1};	Cytochrome P450 CYP2 subfamily	GO:0016021,integral component of membrane; GO:0016711,flavonoid 3'-monooxygenase activity; GO:0020037,heme binding; GO:0005506,iron ion binding; GO:0009813,flavonoid biosynthetic process; GO:0003674,molecular_function; GO:0003824,catalytic activity; GO:0004497,monooxygenase activity; GO:0016491,oxidoreductase activity; GO:0016705,oxidoreductase activity, acting on paired donors, with incorporatio…	PF00067.25:Cytochrome P450	--	--	--
IFM89_005282	48.7655	63.9325	33.4642	13.0354	11.1559	21.6635	460	651	354	144	160	202	-1.76052	2.13389e-07	2.92806e-05	down	CM027377.1	43091568	43092155	+	IFM89_005282	--	--	--	hypothetical protein IFM89_005282 [Coptis chinensis]	--	A0A835ITX2_9MAGN RecName: Full=C2 domain-containing protein {ECO:0000259|PROSITE:PS50004};	--	--	PF00168.33:C2 domain	--	--	--
IFM89_004668	45.3842	72.5364	64.166	20.513	27.5717	33.2633	1245	2148	1974	659	1150	902	-1.24565	2.1884e-07	2.98324e-05	down	CM027379.1	30737739	30741092	+	IFM89_004668	--	K01188 beta-glucosidase [EC:3.2.1.21] | (RefSeq) beta-glucosidase 12-like isoform X1 (A)	ko00460: Cyanoamino acid metabolism; ko00500: Starch and sucrose metabolism; ko00999: Biosynthesis of various plant secondary metabolites; ko01100: Metabolic pathways; ko01110: Biosynthesis of secondary metabolites	hypothetical protein IFM89_004668 [Coptis chinensis]	BGL12_ORYSI RecName: Full=Beta-glucosidase 12 {ECO:0000305}; EC=3.2.1.21 {ECO:0000305}; Flags: Precursor;	A0A835I5K0_9MAGN SubName: Full=Uncharacterized protein {ECO:0000313|EMBL:KAF9612965.1};	Beta-glucosidase, lactase phlorizinhydrolase, and related proteins	GO:0005576,extracellular region; GO:0033907,beta-D-fucosidase activity; GO:0004565,beta-galactosidase activity; GO:0008422,beta-glucosidase activity; GO:0102483,scopolin beta-glucosidase activity; GO:0005975,carbohydrate metabolic process; GO:0003674,molecular_function; GO:0003824,catalytic activity; GO:0004553,hydrolase activity, hydrolyzing O-glycosyl compounds; GO:0016787,hydrolase activity; G…	PF00232.21:Glycosyl hydrolase family 1	--	--	--
IFM89_010966	89.7016	135.473	64.6509	45.1952	20.0927	22.7824	1888	3078	1526	1114	643	474	-1.80738	2.24783e-07	3.04435e-05	down	CM027378.1	5740233	5744416	+	IFM89_010966	--	K23678 solute carrier family 66 (lysosomal lysine-arginine transporter), member 1 | (RefSeq) probable vacuolar amino acid transporter YPQ1 (A)	--	hypothetical protein IFM89_010966 [Coptis chinensis]	--	A0A835MDY0_9MAGN SubName: Full=Uncharacterized protein {ECO:0000313|EMBL:KAF9620231.1};	Predicted membrane protein	GO:0016021,integral component of membrane; GO:0005575,cellular_component; GO:0016020,membrane; GO:0031224,intrinsic component of membrane; GO:0110165,cellular anatomical entity	PF04193.17:PQ loop repeat	--	--	--
IFM89_037096	9.6764	10.8848	12.4805	28.9564	19.4051	26.2204	224	272	324	785	683	600	1.08721	2.35508e-07	3.16903e-05	up	CM027382.1	5288128	5289745	-	IFM89_037096	--	K22772 flavonol-3-O-glucoside L-rhamnosyltransferase [EC:2.4.1.159] | (RefSeq) anthocyanidin 3-O-glucosyltransferase-like (A)	ko00944: Flavone and flavonol biosynthesis; ko01110: Biosynthesis of secondary metabolites	hypothetical protein IFM89_037096, partial [Coptis chinensis]	UFOG_PETHY RecName: Full=Anthocyanidin-3-O-glucoside rhamnosyltransferase {ECO:0000303|PubMed:8130800}; EC=2.4.1.- {ECO:0000305}; AltName: Full=Anthocyanin rhamnosyl transferase {ECO:0000303|PubMed:8130799};	A0A835HST0_9MAGN RecName: Full=Glycosyltransferase {ECO:0000256|RuleBase:RU362057}; EC=2.4.1.- {ECO:0000256|RuleBase:RU362057}; Flags: Fragment;	UDP-glucuronosyl and UDP-glucosyl transferase	GO:0051566,anthocyanidin-3-glucoside rhamnosyltransferase activity; GO:0008194,UDP-glycosyltransferase activity; GO:0009718,anthocyanin-containing compound biosynthetic process; GO:0003674,molecular_function; GO:0003824,catalytic activity; GO:0016740,transferase activity; GO:0016757,glycosyltransferase activity; GO:0016758,hexosyltransferase activity; GO:0008150,biological_process; GO:0008152,met…	PF00201.21:UDP-glucoronosyl and UDP-glucosyl transferase	--	--	--
IFM89_029476	1.5391	1.6295	1.0784	5.6326	8.3153	8.8974	14	16	11	60	115	80	2.34771	2.58459e-07	3.40078e-05	up	CM027381.1	52120366	52123925	+	IFM89_029476	--	K17604 zinc finger SWIM domain-containing protein 3 | (RefSeq) protein FAR1-RELATED SEQUENCE 6-like (A)	--	hypothetical protein IFM89_029476 [Coptis chinensis]	PS13B_ARATH RecName: Full=26S proteasome non-ATPase regulatory subunit 13 homolog B; AltName: Full=26S proteasome regulatory subunit RPN9b; Short=AtRNP9b; AltName: Full=26S proteasome regulatory subunit S11 homolog B;	A0A835LVT9_9MAGN RecName: Full=FAR1 domain-containing protein {ECO:0000259|Pfam:PF03101};	--	GO:0005829,cytosol; GO:0005634,nucleus; GO:0000502,proteasome complex; GO:0008541,proteasome regulatory particle, lid subcomplex; GO:0005198,structural molecule activity; GO:0030163,protein catabolic process; GO:0006511,ubiquitin-dependent protein catabolic process; GO:0003674,molecular_function; GO:0006807,nitrogen compound metabolic process; GO:0008150,biological_process; GO:0008152,metabolic p…	PF03101.18:FAR1 DNA-binding domain	FAR1	TF	FAR1
IFM89_016535	16.2613	25.7241	22.1863	5.7288	8.3866	10.5175	366	625	560	151	287	234	-1.46561	3.52769e-07	4.30275e-05	down	CM027378.1	92972555	92974760	-	IFM89_016535	--	K17338 receptor expression-enhancing protein 1/2/3/4 | (RefSeq) putative HVA22-like protein g isoform X1 (A)	--	hypothetical protein IFM89_016535 [Coptis chinensis]	GLUA3_ORYSJ RecName: Full=Glutelin type-A 3; Contains: RecName: Full=Glutelin type-A 3 acidic chain; Contains: RecName: Full=Glutelin type-A 3 basic chain; Flags: Precursor;	A0A835MER6_9MAGN SubName: Full=Uncharacterized protein {ECO:0000313|EMBL:KAF9621101.1};	--	GO:0045735,nutrient reservoir activity; GO:0003674,molecular_function	PF00190.25:Cupin	--	--	--
IFM89_018609	9.3259	10.9184	16.9126	30.2416	38.853	27.6666	326	412	663	1238	2065	956	1.29744	3.57143e-07	4.33077e-05	up	CM027383.1	45769153	45772646	+	IFM89_018609	--	K10775 phenylalanine ammonia-lyase [EC:4.3.1.24] | (RefSeq) phenylalanine ammonia-lyase (A)	ko00360: Phenylalanine metabolism; ko00940: Phenylpropanoid biosynthesis; ko01100: Metabolic pathways; ko01110: Biosynthesis of secondary metabolites	hypothetical protein IFM89_018609 [Coptis chinensis]	PAL1_PRUAV RecName: Full=Phenylalanine ammonia-lyase 1; EC=4.3.1.24 {ECO:0000250|UniProtKB:P24481};	A0A835LN08_9MAGN RecName: Full=Phenylalanine ammonia-lyase {ECO:0000256|RuleBase:RU003955}; EC=4.3.1.24 {ECO:0000256|RuleBase:RU003955};	Phenylalanine and histidine ammonia-lyase	GO:0005737,cytoplasm; GO:0045548,phenylalanine ammonia-lyase activity; GO:0009800,cinnamic acid biosynthetic process; GO:0006559,L-phenylalanine catabolic process; GO:0003674,molecular_function; GO:0003824,catalytic activity; GO:0016829,lyase activity; GO:0016840,carbon-nitrogen lyase activity; GO:0016841,ammonia-lyase activity; GO:0006082,organic acid metabolic process; GO:0006725,cellular aroma…	PF00221.22:Aromatic amino acid lyase	--	--	--
IFM89_009083	69.8152	91.7328	84.9423	27.0268	44.1438	45.5062	1372	1946	1872	622	1319	884	-1.16102	4.00752e-07	4.77628e-05	down	CM027378.1	28056635	28060116	+	IFM89_009083	--	K00670 N-alpha-acetyltransferase 30 [EC:2.3.1.256] | (RefSeq) N-alpha-acetyltransferase MAK3 (A)	--	hypothetical protein IFM89_009083 [Coptis chinensis]	MAK3_ARATH RecName: Full=N-alpha-acetyltransferase MAK3; EC=2.3.1.256 {ECO:0000303|PubMed:12897255}; AltName: Full=N-acetyltransferase MAK3 homolog; Short=AtMAK3; AltName: Full=Protein PHOTOSYNTHESIS ALTERED MUTANT 21;	A0A835IKR6_9MAGN RecName: Full=N-acetyltransferase domain-containing protein {ECO:0000259|PROSITE:PS51186};	N-acetyltransferase	GO:0005737,cytoplasm; GO:0031417,NatC complex; GO:0004596,peptide alpha-N-acetyltransferase activity; GO:0017196,N-terminal peptidyl-methionine acetylation; GO:0003674,molecular_function; GO:0003824,catalytic activity; GO:0008080,N-acetyltransferase activity; GO:0016407,acetyltransferase activity; GO:0016410,N-acyltransferase activity; GO:0016740,transferase activity; GO:0016746,acyltransferase a…	PF00583.28:Acetyltransferase (GNAT) family	GNAT	TR	GNAT
IFM89_024488	28.2221	33.4864	18.1462	4.7558	9.4746	10.4017	527	675	380	104	269	192	-1.77841	4.56276e-07	5.34638e-05	down	CM027384.1	10630354	10655233	+	IFM89_024488	--	K19996 phosphatidylinositol transfer protein SFH5 | (RefSeq) patellin-3 (A)	--	hypothetical protein IFM89_024488 [Coptis chinensis]	PATL3_ARATH RecName: Full=Patellin-3;	A0A835H5M0_9MAGN RecName: Full=CRAL_TRIO_N domain-containing protein {ECO:0000259|SMART:SM01100};	Phosphatidylinositol transfer protein SEC14 and related proteins	GO:0005737,cytoplasm; GO:0005886,plasma membrane; GO:0008289,lipid binding; GO:0007049,cell cycle; GO:0051301,cell division; GO:0003674,molecular_function; GO:0005488,binding; GO:0008150,biological_process; GO:0009987,cellular process; GO:0005575,cellular_component; GO:0005622,intracellular anatomical structure; GO:0110165,cellular anatomical entity; GO:0016020,membrane; GO:0071944,cell periphery	PF03765.18:CRAL/TRIO, N-terminal domain	--	--	--
IFM89_019462	13.8209	12.4674	29.4271	107.144	59.92	50.6682	343	334	819	3114	2261	1243	1.87912	4.65775e-07	5.42719e-05	up	CM027385.1	75218813	75223104	+	IFM89_019462	--	K15227 arogenate dehydrogenase (NADP+), plant [EC:1.3.1.78] | (RefSeq) arogenate dehydrogenase 2, chloroplastic-like (A)	ko00400: Phenylalanine, tyrosine and tryptophan biosynthesis; ko01100: Metabolic pathways; ko01110: Biosynthesis of secondary metabolites; ko01230: Biosynthesis of amino acids	hypothetical protein IFM89_019462 [Coptis chinensis]	TYRA2_ARATH RecName: Full=Arogenate dehydrogenase 2, chloroplastic; EC=1.3.1.78; AltName: Full=TyrAAT2; Flags: Precursor;	A0A835GYB7_9MAGN RecName: Full=Prephenate/arogenate dehydrogenase domain-containing protein {ECO:0000259|PROSITE:PS51176};	Prephenate dehydrogenase (NADP+)	GO:0009507,chloroplast; GO:0033730,arogenate dehydrogenase (NADP+) activity; GO:0008977,prephenate dehydrogenase (NAD+) activity; GO:0004665,prephenate dehydrogenase (NADP+) activity; GO:0006571,tyrosine biosynthetic process; GO:0003674,molecular_function; GO:0003824,catalytic activity; GO:0016491,oxidoreductase activity; GO:0016627,oxidoreductase activity, acting on the CH-CH group of donors; GO…	PF02153.20:Prephenate dehydrogenase, nucleotide-binding domain	--	--	--
IFM89_037388	20.4371	20.6935	21.158	41.0215	35.0105	56.9205	559	611	649	1314	1456	1539	1.0092	5.26856e-07	5.94466e-05	up	CM027379.1	118910216	118915623	+	IFM89_037388	--	K13384 (RS)-1-benzyl-1,2,3,4-tetrahydroisoquinoline N-methyltransferase [EC:2.1.1.115 2.1.1.140] | (RefSeq) (S)-coclaurine N-methyltransferase (A)	ko00950: Isoquinoline alkaloid biosynthesis; ko01100: Metabolic pathways; ko01110: Biosynthesis of secondary metabolites	hypothetical protein IFM89_037388 [Coptis chinensis]	PNMT_THLFG RecName: Full=Pavine N-methyltransferase {ECO:0000303|PubMed:19624470}; Short=PfPavNMT {ECO:0000303|PubMed:19624470}; EC=2.1.1.300 {ECO:0000269|PubMed:19624470, ECO:0000269|PubMed:27573242};	A0A835MBE0_9MAGN SubName: Full=Uncharacterized protein {ECO:0000313|EMBL:KAF9617576.1};	--	GO:0005737,cytoplasm; GO:0008168,methyltransferase activity; GO:0032259,methylation; GO:0003674,molecular_function; GO:0003824,catalytic activity; GO:0016740,transferase activity; GO:0016741,transferase activity, transferring one-carbon groups; GO:0008150,biological_process; GO:0008152,metabolic process; GO:0005575,cellular_component; GO:0005622,intracellular anatomical structure; GO:0110165,cell…	PF02353.23:Mycolic acid cyclopropane synthetase	--	--	--
IFM89_015844	13.9195	19.8091	14.7506	3.7897	4.5111	1.6326	69	106	82	22	34	8	-2.3479	5.46025e-07	6.12282e-05	down	CM027378.1	66651916	66652224	-	IFM89_015844	--	K03676 glutaredoxin 3 | (RefSeq) monothiol glutaredoxin-S10-like (A)	--	hypothetical protein IFM89_015844 [Coptis chinensis]	GRS10_ARATH RecName: Full=Monothiol glutaredoxin-S10; Short=AtGrxS10; AltName: Full=Protein ROXY 3;	A0A835M953_9MAGN RecName: Full=Glutaredoxin domain-containing protein {ECO:0000259|Pfam:PF00462};	Glutaredoxin and related proteins	GO:0005737,cytoplasm; GO:0005634,nucleus; GO:0051537,2 iron, 2 sulfur cluster binding; GO:0097573,glutathione oxidoreductase activity; GO:0046872,metal ion binding; GO:0000122,negative regulation of transcription by RNA polymerase II; GO:0003674,molecular_function; GO:0005488,binding; GO:0051536,iron-sulfur cluster binding; GO:0051540,metal cluster binding; GO:0003824,catalytic activity; GO:00150…	PF00462.27:Glutaredoxin	--	--	--
IFM89_028719	357.054	540.229	577.52	104.531	159.737	258.685	3643	5950	6608	1249	2478	2609	-1.57739	5.69646e-07	6.35353e-05	down	CM027385.1	83493562	83494197	-	IFM89_028719	--	--	--	hypothetical protein IFM89_028719 [Coptis chinensis]	--	A0A835GYH0_9MAGN SubName: Full=Uncharacterized protein {ECO:0000313|EMBL:KAF9589784.1};	--	--	PF13671.9:AAA domain	--	--	--
IFM89_018751	224.461	463.784	282.304	88.2324	145.612	142.979	5711	12738	8055	2629	5633	3596	-1.44746	5.84389e-07	6.4833e-05	down	CM027382.1	82127050	82130815	-	IFM89_018751	--	K01784 UDP-glucose 4-epimerase [EC:5.1.3.2] | (RefSeq) bifunctional UDP-glucose 4-epimerase and UDP-xylose 4-epimerase 1 (A)	ko00052: Galactose metabolism; ko00520: Amino sugar and nucleotide sugar metabolism; ko01100: Metabolic pathways; ko01250: Biosynthesis of nucleotide sugars	hypothetical protein IFM89_018751 [Coptis chinensis]	UGE1_PEA RecName: Full=Bifunctional UDP-glucose 4-epimerase and UDP-xylose 4-epimerase 1 {ECO:0000303|PubMed:19754426}; EC=5.1.3.2 {ECO:0000269|PubMed:19754426}; EC=5.1.3.5 {ECO:0000269|PubMed:19754426}; AltName: Full=UDP-D-xylose 4-epimerase {ECO:0000305}; AltName: Full=UDP-L-arabinose 4-epimerase {ECO:0000305}; AltName: Full=UDP-galactose 4-epimerase 1 {ECO:0000303|PubMed:19754426}; AltName: Fu…	A0A835HNK0_9MAGN RecName: Full=UDP-glucose 4-epimerase {ECO:0000256|RuleBase:RU366046}; EC=5.1.3.- {ECO:0000256|RuleBase:RU366046};	UDP-glucose 4-epimerase/UDP-sulfoquinovose synthase	GO:0050373,UDP-arabinose 4-epimerase activity; GO:0003978,UDP-glucose 4-epimerase activity; GO:0045227,capsule polysaccharide biosynthetic process; GO:0071555,cell wall organization; GO:0006012,galactose metabolic process; GO:0033358,UDP-L-arabinose biosynthetic process; GO:0003674,molecular_function; GO:0003824,catalytic activity; GO:0016853,isomerase activity; GO:0016854,racemase and epimerase …	PF16363.8:GDP-mannose 4,6 dehydratase	--	--	--
novel.1362	15.5114	10.6162	11.5092	6.3755	5.2913	4.8012	268	198	223	129	139	82	-1.27479	6.08448e-07	6.7145e-05	down	CM027378.1	81474814	81476413	+	--	--	K10406 kinesin family member C2/C3 | (RefSeq) kinesin-like protein KIN-14L (A)	--	hypothetical protein IFM89_035678 [Coptis chinensis]	--	A0A835IWR7_9MAGN SubName: Full=Uncharacterized protein {ECO:0000313|EMBL:KAF9622963.1};	--	--	--	--	--	--
IFM89_008685	6.847	9.4829	6.0753	2.2576	3.2994	3.1204	202	302	201	78	148	91	-1.44996	6.1319e-07	6.73121e-05	down	CM027385.1	66179636	66184279	+	IFM89_008685	--	K04733 interleukin-1 receptor-associated kinase 4 [EC:2.7.11.1] | (RefSeq) G-type lectin S-receptor-like serine/threonine-protein kinase RKS1 isoform X1 (A)	--	hypothetical protein IFM89_008685 [Coptis chinensis]	CRK10_ARATH RecName: Full=Cysteine-rich receptor-like protein kinase 10; Short=Cysteine-rich RLK10; EC=2.7.11.-; AltName: Full=Receptor-like protein kinase 4; Flags: Precursor;	A0A835H031_9MAGN SubName: Full=Uncharacterized protein {ECO:0000313|EMBL:KAF9588268.1};	--	GO:0005829,cytosol; GO:0016021,integral component of membrane; GO:0005886,plasma membrane; GO:0005524,ATP binding; GO:0106310,protein serine kinase activity; GO:0004674,protein serine/threonine kinase activity; GO:0042742,defense response to bacterium; GO:0006468,protein phosphorylation; GO:0000166,nucleotide binding; GO:0003674,molecular_function; GO:0005488,binding; GO:0017076,purine nucleotide…	PF01657.20:Salt stress response/antifungal	--	--	--
IFM89_038112	341.837	479.067	370.509	103.334	179.261	219.632	5610	8487	6819	1986	4473	3563	-1.32787	6.99948e-07	7.56415e-05	down	CM027382.1	64442689	64443711	-	IFM89_038112	--	--	--	hypothetical protein IFM89_038112 [Coptis chinensis]	FBK46_ARATH RecName: Full=F-box/kelch-repeat protein At2g44130;	A0A835HQZ1_9MAGN RecName: Full=F-box domain-containing protein {ECO:0000259|PROSITE:PS50181};	FOG: Kelch repeat	GO:0005829,cytosol; GO:2000762,regulation of phenylpropanoid metabolic process; GO:0006725,cellular aromatic compound metabolic process; GO:0008150,biological_process; GO:0008152,metabolic process; GO:0009698,phenylpropanoid metabolic process; GO:0009987,cellular process; GO:0019222,regulation of metabolic process; GO:0019748,secondary metabolic process; GO:0031323,regulation of cellular metaboli…	PF01344.28:Kelch motif	--	--	--
novel.7007	5.8507	5.344	5.6804	2.6847	2.877	1.7425	214	211	233	115	160	63	-1.28377	7.16551e-07	7.70366e-05	down	CM027384.1	76346868	76349709	-	--	--	--	--	--	--	--	--	--	--	--	--	--
IFM89_023647	261.733	260.113	363.482	891.121	543.691	567.227	8448	9063	13157	33684	26682	18098	1.09091	7.30416e-07	7.77259e-05	up	CM027381.1	96845222	96847342	+	IFM89_023647	--	K01251 adenosylhomocysteinase [EC:3.3.1.1] | (RefSeq) adenosylhomocysteinase (A)	ko00270: Cysteine and methionine metabolism; ko01100: Metabolic pathways	hypothetical protein IFM89_023647 [Coptis chinensis]	SAHH_CATRO RecName: Full=Adenosylhomocysteinase; Short=AdoHcyase; EC=3.3.1.1; AltName: Full=S-adenosyl-L-homocysteine hydrolase;	A0A835HXX9_9MAGN RecName: Full=Adenosylhomocysteinase {ECO:0000256|ARBA:ARBA00012685, ECO:0000256|RuleBase:RU000548}; EC=3.3.1.1 {ECO:0000256|ARBA:ARBA00012685, ECO:0000256|RuleBase:RU000548};	S-adenosylhomocysteine hydrolase	GO:0004013,adenosylhomocysteinase activity; GO:0006730,one-carbon metabolic process; GO:0003674,molecular_function; GO:0003824,catalytic activity; GO:0016787,hydrolase activity; GO:0016801,hydrolase activity, acting on ether bonds; GO:0016802,trialkylsulfonium hydrolase activity; GO:0008150,biological_process; GO:0008152,metabolic process; GO:0009987,cellular process; GO:0044237,cellular metaboli…	PF05221.20:S-adenosyl-L-homocysteine hydrolase	--	--	--
IFM89_002698	213.702	245.375	188.526	77.9731	90.2683	140.84	3466	4296	3429	1481	2226	2258	-1.15012	7.71101e-07	8.08184e-05	down	CM027378.1	77693431	77694441	+	IFM89_002698	--	K14499 BRI1 kinase inhibitor 1 | (RefSeq) BRI1 kinase inhibitor 1-like (A)	ko04075: Plant hormone signal transduction	hypothetical protein IFM89_002698 [Coptis chinensis]	MAKR1_ARATH RecName: Full=Probable membrane-associated kinase regulator 1;	A0A835IH29_9MAGN SubName: Full=Uncharacterized protein {ECO:0000313|EMBL:KAF9618830.1};	--	GO:0005829,cytosol; GO:0005886,plasma membrane; GO:0009536,plastid; GO:0019210,kinase inhibitor activity; GO:0009742,brassinosteroid mediated signaling pathway; GO:0006629,lipid metabolic process; GO:0009741,response to brassinosteroid; GO:0003674,molecular_function; GO:0004857,enzyme inhibitor activity; GO:0019207,kinase regulator activity; GO:0030234,enzyme regulator activity; GO:0098772,molecu…	--	--	--	--
IFM89_027461	7.7644	1.8321	10.9079	0.9382	0.5781	0.4446	106	27	167	15	12	6	-3.46819	8.9858e-07	9.0979e-05	down	CM027377.1	4643820	4644839	-	IFM89_027461	--	K08864 tousled-like kinase [EC:2.7.11.1] | (RefSeq) serine/threonine-protein kinase TOUSLED-like isoform X1 (A)	--	hypothetical protein IFM89_027461 [Coptis chinensis]	CHR42_ARATH RecName: Full=Protein CHLORORESPIRATORY REDUCTION 42, chloroplastic {ECO:0000303|PubMed:22274627}; Flags: Precursor;	A0A835IVE6_9MAGN SubName: Full=Uncharacterized protein {ECO:0000313|EMBL:KAF9625850.1};	Tousled-like protein kinase	GO:0009570,chloroplast stroma; GO:0009536,plastid; GO:0010258,NADH dehydrogenase complex (plastoquinone) assembly; GO:0008150,biological_process; GO:0009987,cellular process; GO:0010257,NADH dehydrogenase complex assembly; GO:0010275,NAD(P)H dehydrogenase complex assembly; GO:0016043,cellular component organization; GO:0022607,cellular component assembly; GO:0043933,protein-containing complex org…	PF11347.11:Protein of unknown function (DUF3148)	--	--	--
IFM89_011511	10.7432	23.6128	18.1032	6.8018	7.0927	5.2894	263	624	497	195	264	128	-1.53474	1.02168e-06	0.000100992	down	CM027379.1	92527312	92533634	+	IFM89_011511	--	K00826 branched-chain amino acid aminotransferase [EC:2.6.1.42] | (RefSeq) branched-chain-amino-acid aminotransferase 2, chloroplastic-like (A)	ko00270: Cysteine and methionine metabolism; ko00280: Valine, leucine and isoleucine degradation; ko00290: Valine, leucine and isoleucine biosynthesis; ko00770: Pantothenate and CoA biosynthesis; ko00966: Glucosinolate biosynthesis; ko01100: Metabolic pathways; ko01110: Biosynthesis of secondary metabolites; ko01210: 2-Oxocarboxylic acid metabolism; ko01230: Biosynthesis of amino acids; ko01240: …	hypothetical protein IFM89_011511 [Coptis chinensis]	BCAT2_HUMLU RecName: Full=Branched-chain amino acid aminotransferase 2, chloroplastic {ECO:0000303|PubMed:23347725}; Short=HlBCAT2 {ECO:0000303|PubMed:23347725}; EC=2.6.1.42 {ECO:0000269|PubMed:23347725}; Flags: Precursor;	A0A835IBL4_9MAGN RecName: Full=Branched-chain-amino-acid aminotransferase {ECO:0000256|RuleBase:RU004517}; EC=2.6.1.42 {ECO:0000256|RuleBase:RU004517};	Branched chain aminotransferase BCAT1, pyridoxal phosphate enzymes type IV superfamily	GO:0009507,chloroplast; GO:0052656,L-isoleucine transaminase activity; GO:0052654,L-leucine transaminase activity; GO:0050048,L-leucine:2-oxoglutarate aminotransferase activity; GO:0052655,L-valine transaminase activity; GO:0009097,isoleucine biosynthetic process; GO:0009098,leucine biosynthetic process; GO:0009099,valine biosynthetic process; GO:0003674,molecular_function; GO:0003824,catalytic a…	PF01063.22:Amino-transferase class IV	--	--	--
IFM89_009468	26.0169	23.6543	36.8502	144.255	69.0407	59.0473	1725	1693	2740	11201	6960	3870	1.56623	1.03844e-06	0.000102163	up	CM027379.1	64489525	64495173	+	IFM89_009468	--	K03327 multidrug resistance protein, MATE family | (RefSeq) protein DETOXIFICATION 33-like (A)	--	hypothetical protein IFM89_009468 [Coptis chinensis]	DTX33_ARATH RecName: Full=Protein DETOXIFICATION 33 {ECO:0000303|PubMed:11739388}; Short=AtDTX33 {ECO:0000303|PubMed:11739388}; AltName: Full=Multidrug and toxic compound extrusion protein 33 {ECO:0000305}; Short=MATE protein 33 {ECO:0000305};	A0A835M260_9MAGN RecName: Full=Protein DETOXIFICATION {ECO:0000256|RuleBase:RU004914}; AltName: Full=Multidrug and toxic compound extrusion protein {ECO:0000256|RuleBase:RU004914};	Uncharacterized membrane protein, predicted efflux pump	GO:0016021,integral component of membrane; GO:0016020,membrane; GO:0005634,nucleus; GO:0000325,plant-type vacuole; GO:0015297,antiporter activity; GO:0022857,transmembrane transporter activity; GO:0042910,xenobiotic transmembrane transporter activity; GO:1990961,xenobiotic detoxification by transmembrane export across the plasma membrane; GO:0003674,molecular_function; GO:0005215,transporter acti…	PF01554.21:MatE	--	--	--
IFM89_032585	1.719	2.4864	2.3396	5.7426	5.6925	4.8813	57	89	87	223	287	160	1.23264	1.07804e-06	0.000105457	up	CM027378.1	98710201	98713900	-	IFM89_032585	--	K14506 jasmonic acid-amino synthetase [EC:6.3.2.52] | (RefSeq) uncharacterized LOC109115461 (A)	ko04075: Plant hormone signal transduction	hypothetical protein IFM89_032585 [Coptis chinensis]	--	A0A835ISN5_9MAGN SubName: Full=Uncharacterized protein {ECO:0000313|EMBL:KAF9622664.1};	--	--	PF04784.17:Protein of unknown function, DUF547	--	--	--
IFM89_039815	18.7365	15.3543	28.1314	109.02	56.902	44.5916	468	414	788	3189	2161	1101	1.67069	1.19778e-06	0.000114181	up	JADFTS010000061.1	209022	210578	-	IFM89_039815	--	K01593 aromatic-L-amino-acid/L-tryptophan decarboxylase [EC:4.1.1.28 4.1.1.105] | (RefSeq) tyrosine/DOPA decarboxylase 2-like (A)	ko00350: Tyrosine metabolism; ko00360: Phenylalanine metabolism; ko00380: Tryptophan metabolism; ko00901: Indole alkaloid biosynthesis; ko00950: Isoquinoline alkaloid biosynthesis; ko00965: Betalain biosynthesis; ko01100: Metabolic pathways; ko01110: Biosynthesis of secondary metabolites	hypothetical protein IFM89_039815 [Coptis chinensis]	TYDC2_PAPSO RecName: Full=Tyrosine/DOPA decarboxylase 2; Includes: RecName: Full=DOPA decarboxylase; Short=DDC; EC=4.1.1.28; Includes: RecName: Full=Tyrosine decarboxylase; EC=4.1.1.25;	A0A835L9F8_9MAGN RecName: Full=Tyrosine decarboxylase {ECO:0000256|ARBA:ARBA00023470}; EC=4.1.1.25 {ECO:0000256|ARBA:ARBA00023470};	Aromatic-L-amino-acid/L-histidine decarboxylase	GO:0036467,5-hydroxy-L-tryptophan decarboxylase activity; GO:0036468,L-dopa decarboxylase activity; GO:0030170,pyridoxal phosphate binding; GO:0004837,tyrosine decarboxylase activity; GO:0006520,cellular amino acid metabolic process; GO:0003674,molecular_function; GO:0003824,catalytic activity; GO:0004058,aromatic-L-amino-acid decarboxylase activity; GO:0016829,lyase activity; GO:0016830,carbon-c…	PF00282.22:Pyridoxal-dependent decarboxylase conserved domain	--	--	--
IFM89_023101	50.4393	45.9448	88.3256	262.141	141.937	146.351	1077	1059	2115	6555	4608	3089	1.48841	1.19891e-06	0.000114181	up	CM027381.1	97635698	97637333	-	IFM89_023101	--	K13383 (RS)-norcoclaurine 6-O-methyltransferase [EC:2.1.1.128] | (RefSeq) (RS)-norcoclaurine 6-O-methyltransferase-like (A)	ko00950: Isoquinoline alkaloid biosynthesis; ko01100: Metabolic pathways; ko01110: Biosynthesis of secondary metabolites	hypothetical protein IFM89_023101 [Coptis chinensis]	6OMT_COPJA RecName: Full=(RS)-norcoclaurine 6-O-methyltransferase; EC=2.1.1.128; AltName: Full=S-adenosyl-L-methionine:norcoclaurine 6-O-methyltransferase; Short=6-OMT;	A0A835HXA6_9MAGN SubName: Full=Uncharacterized protein {ECO:0000313|EMBL:KAF9606078.1};	Hydroxyindole-O-methyltransferase and related SAM-dependent methyltransferases	GO:0030786,(RS)-norcoclaurine 6-O-methyltransferase activity; GO:0008171,O-methyltransferase activity; GO:0046983,protein dimerization activity; GO:0032259,methylation; GO:0003674,molecular_function; GO:0003824,catalytic activity; GO:0008168,methyltransferase activity; GO:0008757,S-adenosylmethionine-dependent methyltransferase activity; GO:0016740,transferase activity; GO:0016741,transferase act…	PF00891.21:O-methyltransferase domain	--	--	--
IFM89_023100	39.7012	30.2578	50.826	155.01	83.085	87.9584	863	710	1239	3946	2746	1890	1.34586	1.32109e-06	0.000123561	up	CM027381.1	97665397	97667235	-	IFM89_023100	--	K13385 N-methylcoclaurine 3'-monooxygenase [EC:1.14.14.102] | (RefSeq) (S)-N-methylcoclaurine 3'-hydroxylase isozyme 1 (A)	ko00950: Isoquinoline alkaloid biosynthesis; ko01100: Metabolic pathways; ko01110: Biosynthesis of secondary metabolites	hypothetical protein IFM89_023100 [Coptis chinensis]	C80B2_COPJA RecName: Full=Probable (S)-N-methylcoclaurine 3'-hydroxylase isozyme 2; EC=1.14.14.102 {ECO:0000250|UniProtKB:O64899}; AltName: Full=Cytochrome P450 80B2;	A0A835HXA4_9MAGN SubName: Full=Uncharacterized protein {ECO:0000313|EMBL:KAF9606077.1};	Cytochrome P450 CYP2 subfamily	GO:0005789,endoplasmic reticulum membrane; GO:0016021,integral component of membrane; GO:0020037,heme binding; GO:0005506,iron ion binding; GO:0050593,N-methylcoclaurine 3'-monooxygenase activity; GO:0019438,aromatic compound biosynthetic process; GO:1901362,organic cyclic compound biosynthetic process; GO:0003674,molecular_function; GO:0005488,binding; GO:0046906,tetrapyrrole binding; GO:0097159…	PF00067.25:Cytochrome P450	--	--	--
IFM89_003751	16.7571	14.2298	18.0555	53.6255	36.0485	28.6066	432	396	522	1619	1413	729	1.18407	1.40461e-06	0.000130205	up	CM027379.1	88924011	88929082	+	IFM89_003751	--	K16190 glucuronokinase [EC:2.7.1.43] | (RefSeq) transcription factor TDR (A)	ko00040: Pentose and glucuronate interconversions; ko00053: Ascorbate and aldarate metabolism; ko00520: Amino sugar and nucleotide sugar metabolism; ko01100: Metabolic pathways; ko01250: Biosynthesis of nucleotide sugars	hypothetical protein IFM89_003751 [Coptis chinensis]	BH035_ARATH RecName: Full=Transcription factor bHLH35; AltName: Full=Basic helix-loop-helix protein 35; Short=AtbHLH35; Short=bHLH 35; AltName: Full=Transcription factor EN 41; AltName: Full=bHLH transcription factor bHLH035;	A0A835I8H3_9MAGN RecName: Full=BHLH domain-containing protein {ECO:0000259|PROSITE:PS50888};	--	GO:0005634,nucleus; GO:0003700,DNA-binding transcription factor activity; GO:0046983,protein dimerization activity; GO:0043565,sequence-specific DNA binding; GO:0006355,regulation of DNA-templated transcription; GO:0003674,molecular_function; GO:0140110,transcription regulator activity; GO:0005488,binding; GO:0005515,protein binding; GO:0003676,nucleic acid binding; GO:0003677,DNA binding; GO:009…	PF00010.29:Helix-loop-helix DNA-binding domain	--	--	--
IFM89_030333	2.5973	2.9256	3.0529	5.4186	7.4347	7.1659	88	107	116	215	383	240	1.14002	1.64044e-06	0.000148759	up	CM027379.1	15948120	15952459	+	IFM89_030333	--	K00131 glyceraldehyde-3-phosphate dehydrogenase (NADP+) [EC:1.2.1.9] | (RefSeq) NADP-dependent glyceraldehyde-3-phosphate dehydrogenase isoform X1 (A)	ko00010: Glycolysis / Gluconeogenesis; ko00030: Pentose phosphate pathway; ko01100: Metabolic pathways; ko01200: Carbon metabolism	hypothetical protein IFM89_030333 [Coptis chinensis]	GAPN_NICPL RecName: Full=NADP-dependent glyceraldehyde-3-phosphate dehydrogenase; EC=1.2.1.9; AltName: Full=Glyceraldehyde-3-phosphate dehydrogenase [NADP(+)]; AltName: Full=Non-phosphorylating glyceraldehyde 3-phosphate dehydrogenase; AltName: Full=Triosephosphate dehydrogenase;	A0A835IF79_9MAGN RecName: Full=Aldedh domain-containing protein {ECO:0000259|Pfam:PF00171};	Aldehyde dehydrogenase	GO:0005737,cytoplasm; GO:0008886,glyceraldehyde-3-phosphate dehydrogenase (NADP+) (non-phosphorylating) activity; GO:0003674,molecular_function; GO:0003824,catalytic activity; GO:0016491,oxidoreductase activity; GO:0016620,oxidoreductase activity, acting on the aldehyde or oxo group of donors, NAD or NADP as acceptor; GO:0016903,oxidoreductase activity, acting on the aldehyde or oxo group of dono…	PF00171.25:Aldehyde dehydrogenase family	--	--	--
IFM89_007361	65.8224	72.6525	96.2813	215.327	143.312	142.288	2397	2856	3932	9183	7935	5122	1.00734	1.73152e-06	0.000156339	up	CM027384.1	86098193	86103714	-	IFM89_007361	--	K00297 methylenetetrahydrofolate reductase (NADH) [EC:1.5.1.54] | (RefSeq) methylenetetrahydrofolate reductase 1 (A)	ko00670: One carbon pool by folate; ko01100: Metabolic pathways; ko01200: Carbon metabolism	hypothetical protein IFM89_007361 [Coptis chinensis]	MTHR1_MAIZE RecName: Full=Methylenetetrahydrofolate reductase 1; EC=1.5.1.20; AltName: Full=ZmMTHFR1;	A0A835LLL7_9MAGN RecName: Full=Methylenetetrahydrofolate reductase {ECO:0000256|RuleBase:RU003862}; EC=1.5.1.20 {ECO:0000256|RuleBase:RU003862};	5,10-methylenetetrahydrofolate reductase	GO:0005829,cytosol; GO:0071949,FAD binding; GO:0004489,methylenetetrahydrofolate reductase (NAD(P)H) activity; GO:0106312,methylenetetrahydrofolate reductase NADH activity; GO:0106313,methylenetetrahydrofolate reductase NADPH activity; GO:0009086,methionine biosynthetic process; GO:0035999,tetrahydrofolate interconversion; GO:0000166,nucleotide binding; GO:0003674,molecular_function; GO:0005488,b…	PF02219.20:Methylenetetrahydrofolate reductase	--	--	--
IFM89_033148	6897.07	8175.68	4959.26	2118.55	2809.67	4047.16	51782	66260	41755	18627	32073	30036	-1.24045	1.7879e-06	0.000160734	down	CM027383.1	15169750	15171760	+	IFM89_033148	--	K10781 fatty acyl-ACP thioesterase B [EC:3.1.2.14 3.1.2.21] | (RefSeq) uncharacterized protein LOC113347984 isoform X1 (A)	ko00061: Fatty acid biosynthesis; ko01100: Metabolic pathways; ko01212: Fatty acid metabolism	hypothetical protein IFM89_033148 [Coptis chinensis]	MLP31_ARATH RecName: Full=MLP-like protein 31;	A0A835HGV1_9MAGN RecName: Full=Bet_v_1 domain-containing protein {ECO:0000259|SMART:SM01037};	--	GO:0006952,defense response; GO:0006950,response to stress; GO:0008150,biological_process; GO:0050896,response to stimulus	PF00407.22:Pathogenesis-related protein Bet v 1 family	--	--	--
IFM89_019880	0.1395	0.5598	0.9948	4.1281	3.9133	4.7025	3	13	24	104	128	100	2.8154	1.82057e-06	0.000161581	up	CM027384.1	91913983	91915323	-	IFM89_019880	--	K22683 aspartyl protease family protein [EC:3.4.23.-] | (RefSeq) protein ASPARTIC PROTEASE IN GUARD CELL 1 (A)	--	hypothetical protein IFM89_019880 [Coptis chinensis]	ASPG1_ARATH RecName: Full=Protein ASPARTIC PROTEASE IN GUARD CELL 1; Short=AtASPG1; EC=3.4.23.-; Flags: Precursor;	A0A835LIM0_9MAGN RecName: Full=Peptidase A1 domain-containing protein {ECO:0000259|PROSITE:PS51767};	Aspartyl protease	GO:0005783,endoplasmic reticulum; GO:0004190,aspartic-type endopeptidase activity; GO:0070001,aspartic-type peptidase activity; GO:0003677,DNA binding; GO:0006508,proteolysis; GO:0009737,response to abscisic acid; GO:0009414,response to water deprivation; GO:0009627,systemic acquired resistance; GO:0003674,molecular_function; GO:0003824,catalytic activity; GO:0004175,endopeptidase activity; GO:00…	PF14543.9:Xylanase inhibitor N-terminal	--	--	--
IFM89_037011	4.6294	3.4907	4.128	10.3882	8.5324	9.6387	86	70	86	226	241	177	1.13677	1.8643e-06	0.000163377	up	CM027382.1	7559529	7560686	+	IFM89_037011	--	K22794 flavonol-3-O-glucoside/galactoside glucosyltransferase [EC:2.4.1.239 2.4.1.-] | (RefSeq) anthocyanidin 3-O-glucoside 2''-O-glucosyltransferase-like (A)	ko00944: Flavone and flavonol biosynthesis; ko01110: Biosynthesis of secondary metabolites	hypothetical protein IFM89_037011 [Coptis chinensis]	DUSKY_IPONI RecName: Full=Anthocyanidin 3-O-glucoside 2''-O-glucosyltransferase; EC=2.4.1.297; AltName: Full=3-O-glucoside-2''-O-glucosyltransferase; Short=In3GGT; AltName: Full=Protein dusky; Short=Dy;	A0A835HME5_9MAGN SubName: Full=Uncharacterized protein {ECO:0000313|EMBL:KAF9603530.1};	UDP-glucuronosyl and UDP-glucosyl transferase	GO:0102455,anthocyanidin 3-O-glucoside 2''-O-glucosyltransferase activity; GO:0016758,hexosyltransferase activity; GO:0008194,UDP-glycosyltransferase activity; GO:0009718,anthocyanin-containing compound biosynthetic process; GO:0043473,pigmentation; GO:0003674,molecular_function; GO:0003824,catalytic activity; GO:0016740,transferase activity; GO:0016757,glycosyltransferase activity; GO:0008150,bi…	PF03033.23:Glycosyltransferase family 28 N-terminal domain	--	--	--
IFM89_002801	168.846	172.064	239.932	542.792	383.25	328.99	3868	4255	6164	14562	13349	7450	1.02553	2.1018e-06	0.000179095	up	CM027381.1	14668481	14672542	+	IFM89_002801	--	K13396 (S)-tetrahydroprotoberberine N-methyltransferase [EC:2.1.1.122] | (RefSeq) (S)-tetrahydroprotoberberine N-methyltransferase-like (A)	ko00950: Isoquinoline alkaloid biosynthesis; ko01100: Metabolic pathways; ko01110: Biosynthesis of secondary metabolites	hypothetical protein IFM89_002801 [Coptis chinensis]	TNMT_ESCCA RecName: Full=(S)-tetrahydroprotoberberine N-methyltransferase; Short=EcTNMT; EC=2.1.1.122;	A0A835HQW2_9MAGN SubName: Full=Uncharacterized protein {ECO:0000313|EMBL:KAF9604126.1};	--	GO:0005737,cytoplasm; GO:0030782,(S)-tetrahydroprotoberberine N-methyltransferase activity; GO:0032259,methylation; GO:0003674,molecular_function; GO:0003824,catalytic activity; GO:0008168,methyltransferase activity; GO:0008757,S-adenosylmethionine-dependent methyltransferase activity; GO:0016740,transferase activity; GO:0016741,transferase activity, transferring one-carbon groups; GO:0008150,bio…	PF02353.23:Mycolic acid cyclopropane synthetase	--	--	--
IFM89_028764	54.3658	92.0293	76.2033	186.801	174.792	127.494	1801	3291	2831	7247	8804	4175	1.05019	2.23317e-06	0.000187812	up	CM027385.1	83249334	83252864	-	IFM89_028764	--	K10999 cellulose synthase A [EC:2.4.1.12] | (RefSeq) cellulose synthase A catalytic subunit 7 [UDP-forming] (A)	--	hypothetical protein IFM89_028764 [Coptis chinensis]	CSLE6_ORYSJ RecName: Full=Cellulose synthase-like protein E6; EC=2.4.1.-; AltName: Full=OsCslE6;	A0A835GYK1_9MAGN SubName: Full=Uncharacterized protein {ECO:0000313|EMBL:KAF9589829.1};	--	GO:0000139,Golgi membrane; GO:0016021,integral component of membrane; GO:0005886,plasma membrane; GO:0016760,cellulose synthase (UDP-forming) activity; GO:0051753,mannan synthase activity; GO:0071555,cell wall organization; GO:0030244,cellulose biosynthetic process; GO:0009833,plant-type primary cell wall biogenesis; GO:0003674,molecular_function; GO:0003824,catalytic activity; GO:0008194,UDP-gly…	PF03552.17:Cellulose synthase	--	--	--
IFM89_003847	200.194	327.704	259.812	76.138	131.965	142.304	3992	7054	5810	1778	4001	2805	-1.25052	2.4719e-06	0.000202182	down	CM027377.1	15088135	15089605	+	IFM89_003847	--	K00521 ferric-chelate reductase [EC:1.16.1.7] | (RefSeq) ferric reduction oxidase 7, chloroplastic-like (A)	--	hypothetical protein IFM89_003847 [Coptis chinensis]	NAP2_SOLLC RecName: Full=NAC domain-containing protein 2 {ECO:0000303|PubMed:29760199}; Short=SlNAP2 {ECO:0000303|PubMed:29760199};	A0A835IWU2_9MAGN RecName: Full=NAC domain-containing protein {ECO:0000259|PROSITE:PS51005};	--	GO:0005634,nucleus; GO:0043565,sequence-specific DNA binding; GO:1902265,abscisic acid homeostasis; GO:0009738,abscisic acid-activated signaling pathway; GO:0010150,leaf senescence; GO:0031155,regulation of reproductive fruiting body development; GO:0006355,regulation of DNA-templated transcription; GO:0009737,response to abscisic acid; GO:0009646,response to absence of light; GO:0003674,molecula…	PF02365.18:No apical meristem (NAM) protein	NAC	TF	NAC
IFM89_030686	76.8653	96.3434	76.121	26.614	33.042	53.5423	2116	2863	2350	858	1383	1457	-1.22218	2.48743e-06	0.000202657	down	CM027380.1	88779080	88784534	+	IFM89_030686	--	K07300 Ca2+:H+ antiporter | (RefSeq) vacuolar cation/proton exchanger 2-like isoform X1 (A)	--	hypothetical protein IFM89_030686 [Coptis chinensis]	NCL_ARATH RecName: Full=Sodium/calcium exchanger NCL {ECO:0000305}; AltName: Full=Na(+)/Ca(2+)-exchange protein NCL {ECO:0000305}; AltName: Full=Protein NCX-like {ECO:0000303|PubMed:23148213}; Short=AtNCL {ECO:0000303|PubMed:23148213};	A0A835LXN1_9MAGN SubName: Full=Uncharacterized protein {ECO:0000313|EMBL:KAF9611350.1};	--	GO:0016021,integral component of membrane; GO:0016020,membrane; GO:0000325,plant-type vacuole; GO:0005886,plasma membrane; GO:0009506,plasmodesma; GO:0005774,vacuolar membrane; GO:0005773,vacuole; GO:0005509,calcium ion binding; GO:0015369,calcium:proton antiporter activity; GO:0005432,calcium:sodium antiporter activity; GO:0003729,mRNA binding; GO:0055074,calcium ion homeostasis; GO:0070588,calc…	PF01699.27:Sodium/calcium exchanger protein	--	--	--
IFM89_002797	195.34	153.585	260.522	940.531	522.554	366.652	4945	4197	7396	27883	20113	9175	1.49856	2.50168e-06	0.000203025	up	CM027381.1	14713605	14715776	-	IFM89_002797	--	K14975 codeine 3-O-demethylase [EC:1.14.11.32] | (RefSeq) codeine O-demethylase (A)	ko00950: Isoquinoline alkaloid biosynthesis; ko01100: Metabolic pathways; ko01110: Biosynthesis of secondary metabolites	hypothetical protein IFM89_002797 [Coptis chinensis]	NCS1_COPJA RecName: Full=S-norcoclaurine synthase 1; Short=CjNCS1; EC=4.2.1.78;	A0A835HTU1_9MAGN RecName: Full=Fe2OG dioxygenase domain-containing protein {ECO:0000259|PROSITE:PS51471};	Iron/ascorbate family oxidoreductases	GO:0050474,(S)-norcoclaurine synthase activity; GO:0046872,metal ion binding; GO:0016491,oxidoreductase activity; GO:0009820,alkaloid metabolic process; GO:0003674,molecular_function; GO:0003824,catalytic activity; GO:0016829,lyase activity; GO:0016835,carbon-oxygen lyase activity; GO:0016836,hydro-lyase activity; GO:0005488,binding; GO:0043167,ion binding; GO:0043169,cation binding; GO:0006807,n…	PF03171.23:2OG-Fe(II) oxygenase superfamily	--	--	--
IFM89_003734	18.8181	24.1716	30.1811	49.8804	45.0375	61.3415	432	599	777	1341	1572	1392	1.00962	2.52598e-06	0.000203342	up	CM027380.1	11654972	11658082	+	IFM89_003734	--	K01626 3-deoxy-7-phosphoheptulonate synthase [EC:2.5.1.54] | (RefSeq) phospho-2-dehydro-3-deoxyheptonate aldolase 2, chloroplastic-like (A)	ko00400: Phenylalanine, tyrosine and tryptophan biosynthesis; ko01100: Metabolic pathways; ko01110: Biosynthesis of secondary metabolites; ko01230: Biosynthesis of amino acids	hypothetical protein IFM89_003734 [Coptis chinensis]	AROG1_PETHY RecName: Full=Phospho-2-dehydro-3-deoxyheptonate aldolase 1, chloroplastic {ECO:0000305}; EC=2.5.1.54 {ECO:0000250|UniProtKB:O53512}; AltName: Full=3-deoxy-D-arabino-heptulosonate 7-phosphate synthase 1 {ECO:0000303|PubMed:23275577, ECO:0000303|PubMed:24815009}; Short=DAHP synthase 1 {ECO:0000305}; Short=PhDAHP1 {ECO:0000303|PubMed:24815009}; AltName: Full=Phospho-2-keto-3-deoxyhepton…	A0A835HXE8_9MAGN RecName: Full=Phospho-2-dehydro-3-deoxyheptonate aldolase {ECO:0000256|RuleBase:RU363071}; EC=2.5.1.54 {ECO:0000256|RuleBase:RU363071};	--	GO:0009507,chloroplast; GO:0003849,3-deoxy-7-phosphoheptulonate synthase activity; GO:0046872,metal ion binding; GO:0009073,aromatic amino acid family biosynthetic process; GO:0008652,cellular amino acid biosynthetic process; GO:0009423,chorismate biosynthetic process; GO:0010597,green leaf volatile biosynthetic process; GO:0003674,molecular_function; GO:0003824,catalytic activity; GO:0016740,tra…	PF01474.19:Class-II DAHP synthetase family	--	--	--
IFM89_011384	135.178	165.186	147.028	57.1409	79.1379	99.1858	1711	2257	2087	847	1523	1241	-1.0088	2.63712e-06	0.000208342	down	CM027382.1	9385219	9388968	+	IFM89_011384	--	K10666 E3 ubiquitin-protein ligase RNF5 [EC:2.3.2.27] | (RefSeq) E3 ubiquitin-protein ligase RMA1H1-like (A)	ko04141: Protein processing in endoplasmic reticulum	hypothetical protein IFM89_011384 [Coptis chinensis]	RMA3_ARATH RecName: Full=E3 ubiquitin-protein ligase RMA3; EC=2.3.2.27; AltName: Full=Protein RING membrane-anchor 3; AltName: Full=RING-type E3 ubiquitin transferase RMA3 {ECO:0000305};	A0A835LM48_9MAGN RecName: Full=RING-type E3 ubiquitin transferase {ECO:0000256|ARBA:ARBA00012483}; EC=2.3.2.27 {ECO:0000256|ARBA:ARBA00012483};	Predicted E3 ubiquitin ligase	GO:0005783,endoplasmic reticulum; GO:0005789,endoplasmic reticulum membrane; GO:0016021,integral component of membrane; GO:0046872,metal ion binding; GO:0061630,ubiquitin protein ligase activity; GO:0044390,ubiquitin-like protein conjugating enzyme binding; GO:0004842,ubiquitin-protein transferase activity; GO:0071456,cellular response to hypoxia; GO:0071712,ER-associated misfolded protein catabo…	PF00097.28:Zinc finger, C3HC4 type (RING finger)	--	--	--
IFM89_020489	5.1503	6.9258	5.7777	3.2062	2.6443	2.1177	155	225	195	113	121	63	-1.24646	2.94327e-06	0.000228753	down	CM027384.1	6221637	6225199	-	IFM89_020489	--	K12135 zinc finger protein CONSTANS | (RefSeq) zinc finger protein CONSTANS-like (A)	ko04712: Circadian rhythm - plant	hypothetical protein IFM89_020489 [Coptis chinensis]	COL16_ARATH RecName: Full=Zinc finger protein CONSTANS-LIKE 16;	A0A835H7V3_9MAGN SubName: Full=Uncharacterized protein {ECO:0000313|EMBL:KAF9593193.1};	GATA-4/5/6 transcription factors	GO:0005634,nucleus; GO:0003700,DNA-binding transcription factor activity; GO:0008270,zinc ion binding; GO:0006355,regulation of DNA-templated transcription; GO:0003674,molecular_function; GO:0140110,transcription regulator activity; GO:0005488,binding; GO:0043167,ion binding; GO:0043169,cation binding; GO:0046872,metal ion binding; GO:0046914,transition metal ion binding; GO:0006139,nucleobase-co…	PF06203.17:CCT motif	C2C2-CO-like	TF	C2C2->C2C2-CO-like
IFM89_002045	0.6067	0.3512	0.6086	1.8131	6.434	7.7483	8	5	9	28	129	101	3.27361	2.94701e-06	0.000228753	up	CM027385.1	60186241	60187599	-	IFM89_002045	--	K13070 momilactone-A synthase [EC:1.1.1.295] | (RefSeq) momilactone A synthase (A)	ko00904: Diterpenoid biosynthesis; ko01110: Biosynthesis of secondary metabolites	hypothetical protein IFM89_002045 [Coptis chinensis]	SDR3B_ARATH RecName: Full=Short-chain dehydrogenase reductase 3b; Short=AtSDR3b; EC=1.1.1.-;	A0A835GTR5_9MAGN SubName: Full=Uncharacterized protein {ECO:0000313|EMBL:KAF9587405.1};	Reductases with broad range of substrate specificities	GO:0016491,oxidoreductase activity; GO:0003674,molecular_function; GO:0003824,catalytic activity	PF13561.9:Enoyl-(Acyl carrier protein) reductase	--	--	--
IFM89_027593	163.365	153.873	138.906	58.2215	74.6309	102.835	1313	1335	1252	548	912	817	-1.03582	3.13406e-06	0.000236943	down	CM027378.1	106877679	106878179	-	IFM89_027593	--	K02638 plastocyanin | (RefSeq) plastocyanin (A)	ko00195: Photosynthesis; ko01100: Metabolic pathways	hypothetical protein IFM89_027593 [Coptis chinensis]	PLAS1_POPNI RecName: Full=Plastocyanin A, chloroplastic; Short=PCa; Flags: Precursor;	A0A835IQL7_9MAGN RecName: Full=Plastocyanin {ECO:0000256|RuleBase:RU363020};	--	GO:0009535,chloroplast thylakoid membrane; GO:0005507,copper ion binding; GO:0009055,electron transfer activity; GO:0003674,molecular_function; GO:0005488,binding; GO:0043167,ion binding; GO:0043169,cation binding; GO:0046872,metal ion binding; GO:0046914,transition metal ion binding; GO:0003824,catalytic activity; GO:0016491,oxidoreductase activity; GO:0005575,cellular_component; GO:0005622,intr…	PF00127.23:Copper binding proteins, plastocyanin/azurin family	--	--	--
IFM89_032689	439.839	679.767	479.422	194.422	331.223	269.928	27949	46628	34164	14468	32001	16955	-1.0895	3.13545e-06	0.000236943	down	CM027379.1	6827392	6833299	+	IFM89_032689	--	K10144 RING finger and CHY zinc finger domain-containing protein 1 [EC:2.3.2.27] | (RefSeq) probable E3 ubiquitin-protein ligase RZFP34 (A)	ko04120: Ubiquitin mediated proteolysis	hypothetical protein IFM89_032689 [Coptis chinensis]	ZFP34_ORYSJ RecName: Full=Probable E3 ubiquitin-protein ligase RZFP34 {ECO:0000305}; EC=2.3.2.27 {ECO:0000305}; AltName: Full=OsRFP1 {ECO:0000303|Ref.1}; AltName: Full=RING zinc-finger protein 34 {ECO:0000303|PubMed:25002225}; Short=OsRZFP34 {ECO:0000303|PubMed:25002225};	A0A835M7R6_9MAGN SubName: Full=Uncharacterized protein {ECO:0000313|EMBL:KAF9616839.1};	Zn-finger protein	GO:0005634,nucleus; GO:0061630,ubiquitin protein ligase activity; GO:0008270,zinc ion binding; GO:0016567,protein ubiquitination; GO:0006511,ubiquitin-dependent protein catabolic process; GO:0003674,molecular_function; GO:0003824,catalytic activity; GO:0004842,ubiquitin-protein transferase activity; GO:0016740,transferase activity; GO:0019787,ubiquitin-like protein transferase activity; GO:006165…	PF14599.9:Zinc-ribbon	--	--	--
IFM89_016084	16.0979	14.7156	24.7253	78.631	50.9092	34.0768	454	448	782	2597	2183	950	1.47187	3.32846e-06	0.000249719	up	CM027378.1	11569098	11575308	+	IFM89_016084	--	K00422 polyphenol oxidase [EC:1.10.3.1] | (RefSeq) polyphenol oxidase I, chloroplastic-like (A)	ko00350: Tyrosine metabolism; ko00950: Isoquinoline alkaloid biosynthesis; ko01100: Metabolic pathways; ko01110: Biosynthesis of secondary metabolites	hypothetical protein IFM89_016084 [Coptis chinensis]	AS1_ANTMA RecName: Full=Aureusidin synthase; Short=AmAS1; EC=1.21.3.6 {ECO:0000269|PubMed:11073455, ECO:0000269|PubMed:11418122};	A0A835INJ6_9MAGN SubName: Full=Uncharacterized protein {ECO:0000313|EMBL:KAF9621060.1};	--	GO:0005775,vacuolar lumen; GO:0033793,aureusidin synthase activity; GO:0102706,butein:oxygen oxidoreductase activity; GO:0004097,catechol oxidase activity; GO:0005507,copper ion binding; GO:0102791,sulfuretin synthase activity; GO:0046148,pigment biosynthetic process; GO:0003674,molecular_function; GO:0003824,catalytic activity; GO:0016491,oxidoreductase activity; GO:0046992,oxidoreductase activi…	PF12143.11:Protein of unknown function (DUF_B2219)	--	--	--
IFM89_035122	221.897	255.237	279.507	57.6311	88.4017	152.086	3873	4809	5471	1178	2346	2624	-1.42506	3.59926e-06	0.00026433	down	CM027378.1	31616696	31618474	-	IFM89_035122	--	K18819 inositol 3-alpha-galactosyltransferase [EC:2.4.1.123] | (RefSeq) galactinol synthase 1 (A)	ko00052: Galactose metabolism; ko01100: Metabolic pathways	hypothetical protein IFM89_035122 [Coptis chinensis]	GOLS1_AJURE RecName: Full=Galactinol synthase 1; Short=ArGolS1; Short=GolS-1; EC=2.4.1.123;	A0A835IT38_9MAGN RecName: Full=Hexosyltransferase {ECO:0000256|RuleBase:RU362027}; EC=2.4.1.- {ECO:0000256|RuleBase:RU362027};	Glycosyl transferase, family 8 - glycogenin	GO:0005737,cytoplasm; GO:0047216,inositol 3-alpha-galactosyltransferase activity; GO:0046872,metal ion binding; GO:0052576,carbohydrate storage; GO:0070417,cellular response to cold; GO:0006012,galactose metabolic process; GO:0010325,raffinose family oligosaccharide biosynthetic process; GO:0003674,molecular_function; GO:0003824,catalytic activity; GO:0008194,UDP-glycosyltransferase activity; GO:…	PF01501.23:Glycosyl transferase family 8	--	--	--
IFM89_006661	79.9045	70.1024	121.793	379.047	207.346	176.429	1851	1753	3164	10283	7303	4040	1.40155	3.73891e-06	0.000272666	up	CM027377.1	38435288	38437596	-	IFM89_006661	--	K13386 3'-hydroxy-N-methyl-(S)-coclaurine 4'-O-methyltransferase [EC:2.1.1.116] | (RefSeq) 3'-hydroxy-N-methyl-(S)-coclaurine 4'-O-methyltransferase 2 (A)	ko00950: Isoquinoline alkaloid biosynthesis; ko01100: Metabolic pathways; ko01110: Biosynthesis of secondary metabolites	hypothetical protein IFM89_006661 [Coptis chinensis]	4OMT_COPJA RecName: Full=3'-hydroxy-N-methyl-(S)-coclaurine 4'-O-methyltransferase; EC=2.1.1.116; AltName: Full=S-adenosyl-L-methionine:3'-hydroxy-N-methylcoclaurine 4'-O-methyltransferase; Short=4'-OMT;	A0A835MEB4_9MAGN SubName: Full=Uncharacterized protein {ECO:0000313|EMBL:KAF9623934.1};	Hydroxyindole-O-methyltransferase and related SAM-dependent methyltransferases	GO:0030784,3'-hydroxy-N-methyl-(S)-coclaurine 4'-O-methyltransferase activity; GO:0008171,O-methyltransferase activity; GO:0046983,protein dimerization activity; GO:0032259,methylation; GO:0003674,molecular_function; GO:0003824,catalytic activity; GO:0008168,methyltransferase activity; GO:0008757,S-adenosylmethionine-dependent methyltransferase activity; GO:0016740,transferase activity; GO:001674…	PF00891.21:O-methyltransferase domain	--	--	--
IFM89_036288	129.856	188.242	134.652	52.998	83.1475	89.5651	3856	6034	4484	1843	3754	2629	-1.0865	3.77588e-06	0.000274402	down	CM027379.1	106960451	106965368	-	IFM89_036288	--	K17500 integrin-linked kinase-associated serine/threonine phosphatase 2C [EC:3.1.3.16] | (RefSeq) WAT1-related protein At3g18200-like (A)	--	hypothetical protein IFM89_036288 [Coptis chinensis]	WTR35_ARATH RecName: Full=WAT1-related protein At4g19185;	A0A835IJ28_9MAGN RecName: Full=WAT1-related protein {ECO:0000256|RuleBase:RU363077};	--	GO:0005794,Golgi apparatus; GO:0016021,integral component of membrane; GO:0005886,plasma membrane; GO:0022857,transmembrane transporter activity; GO:0003674,molecular_function; GO:0005215,transporter activity; GO:0005575,cellular_component; GO:0005622,intracellular anatomical structure; GO:0005737,cytoplasm; GO:0012505,endomembrane system; GO:0043226,organelle; GO:0043227,membrane-bounded organel…	PF00892.23:EamA-like transporter family	--	--	--
novel.8162	11.149	7.4486	11.42	35.2141	25.0512	18.4904	269	194	309	995	919	441	1.30631	4.40257e-06	0.000309173	up	JADFTS010000022.1	184132	193124	-	--	--	--	--	hypothetical protein AQUCO_01400852v1 [Aquilegia coerulea]	WTR24_ARATH RecName: Full=WAT1-related protein At3g30340;	A0A2G5DYG8_AQUCA RecName: Full=WAT1-related protein {ECO:0000256|RuleBase:RU363077};	--	GO:0016021,integral component of membrane; GO:0005886,plasma membrane; GO:0022857,transmembrane transporter activity; GO:0003674,molecular_function; GO:0005215,transporter activity; GO:0005575,cellular_component; GO:0016020,membrane; GO:0031224,intrinsic component of membrane; GO:0110165,cellular anatomical entity; GO:0071944,cell periphery	PF00892.23:EamA-like transporter family	--	--	--
IFM89_001583	379.56	450.758	390.488	141.091	221.183	262.894	2667	3419	3077	1161	2363	1826	-1.04752	4.49258e-06	0.000314435	down	CM027380.1	17790174	17790611	+	IFM89_001583	--	K02634 apocytochrome f | (RefSeq) chaperone protein DnaJ (A)	ko00195: Photosynthesis; ko01100: Metabolic pathways	hypothetical protein IFM89_001583 [Coptis chinensis]	DNJ20_ARATH RecName: Full=Chaperone protein dnaJ 20, chloroplastic; Short=AtDjC20; Short=AtJ20; Flags: Precursor;	A0A835HVQ5_9MAGN RecName: Full=J domain-containing protein {ECO:0000259|PROSITE:PS50076};	Molecular chaperone (DnaJ superfamily)	GO:0009507,chloroplast; GO:0005634,nucleus; GO:0061077,chaperone-mediated protein folding; GO:1902395,regulation of 1-deoxy-D-xylulose-5-phosphate synthase activity; GO:0010322,regulation of isopentenyl diphosphate biosynthetic process, methylerythritol 4-phosphate pathway; GO:0006457,protein folding; GO:0008150,biological_process; GO:0009987,cellular process; GO:0050790,regulation of catalytic a…	PF00226.34:DnaJ domain	--	--	--
novel.988	116.852	134.549	180.696	38.1204	46.0042	82.6233	568	706	985	217	340	397	-1.4582	4.98651e-06	0.000344383	down	CM027378.1	31616222	31616567	+	--	--	--	--	--	--	--	--	--	--	--	--	--
IFM89_006980	2.1296	2.4527	3.0282	6.9791	7.7983	5.9974	37	46	59	142	206	103	1.3653	5.25472e-06	0.000360519	up	CM027383.1	2960606	2964211	-	IFM89_006980	--	K00106 xanthine dehydrogenase/oxidase [EC:1.17.1.4 1.17.3.2] | (RefSeq) xanthine dehydrogenase 1-like isoform X1 (A)	ko00230: Purine metabolism; ko00232: Caffeine metabolism; ko01100: Metabolic pathways; ko01110: Biosynthesis of secondary metabolites; ko01232: Nucleotide metabolism; ko04146: Peroxisome	hypothetical protein IFM89_006980 [Coptis chinensis]	XDH1_ARATH RecName: Full=Xanthine dehydrogenase 1; Short=AtXDH1; EC=1.17.1.4 {ECO:0000269|PubMed:14726515};	A0A835HFS6_9MAGN RecName: Full=Ald_Xan_dh_C2 domain-containing protein {ECO:0000259|Pfam:PF02738};	Xanthine dehydrogenase	GO:0005886,plasma membrane; GO:0051537,2 iron, 2 sulfur cluster binding; GO:0071949,FAD binding; GO:0005506,iron ion binding; GO:0016491,oxidoreductase activity; GO:0004854,xanthine dehydrogenase activity; GO:0006145,purine nucleobase catabolic process; GO:0000302,response to reactive oxygen species; GO:0009414,response to water deprivation; GO:0042554,superoxide anion generation; GO:0046110,xant…	PF02738.21:Molybdopterin cofactor-binding domain	--	--	--
IFM89_032428	18.9935	21.1515	13.3031	3.3933	7.1984	8.2445	564	678	443	118	325	242	-1.586	5.473e-06	0.000372346	down	CM027380.1	4666031	4668732	+	IFM89_032428	--	K18422 helicase MOV-10 [EC:3.6.4.13] | (RefSeq) probable RNA helicase SDE3 (A)	--	hypothetical protein IFM89_032428 [Coptis chinensis]	SDE3_ARATH RecName: Full=Probable RNA helicase SDE3; EC=3.6.4.13; AltName: Full=Silencing defective protein 3;	A0A835I8X3_9MAGN SubName: Full=Uncharacterized protein {ECO:0000313|EMBL:KAF9611458.1};	RNA helicase	GO:0005829,cytosol; GO:0043186,P granule; GO:0005524,ATP binding; GO:0016887,ATP hydrolysis activity; GO:0003723,RNA binding; GO:0003724,RNA helicase activity; GO:0035194,post-transcriptional gene silencing by RNA; GO:0009616,RNAi-mediated antiviral immune response; GO:0000166,nucleotide binding; GO:0003674,molecular_function; GO:0005488,binding; GO:0017076,purine nucleotide binding; GO:0030554,a…	PF13086.9:AAA domain	--	--	--
IFM89_003386	8.3721	5.8268	4.8738	15.8536	13.5233	14.7009	193	145	126	428	474	335	1.12599	5.64717e-06	0.000381175	up	CM027377.1	7233902	7235338	-	IFM89_003386	--	K23260 scopoletin glucosyltransferase [EC:2.4.1.128] | (RefSeq) scopoletin glucosyltransferase (A)	ko00999: Biosynthesis of various plant secondary metabolites; ko01110: Biosynthesis of secondary metabolites	hypothetical protein IFM89_003386 [Coptis chinensis]	U89B2_STERE RecName: Full=UDP-glycosyltransferase 89B2 {ECO:0000303|PubMed:15610349}; EC=2.4.1.- {ECO:0000305};	A0A835IT16_9MAGN SubName: Full=Uncharacterized protein {ECO:0000313|EMBL:KAF9623596.1};	UDP-glucuronosyl and UDP-glucosyl transferase	GO:0008194,UDP-glycosyltransferase activity; GO:0003674,molecular_function; GO:0003824,catalytic activity; GO:0016740,transferase activity; GO:0016757,glycosyltransferase activity	PF00201.21:UDP-glucoronosyl and UDP-glucosyl transferase	--	--	--
novel.2381	1.7388	2.3226	0.0541	0.0345	0	0	86	124	3	2	0	0	-7.01727	5.66677e-06	0.000381264	down	CM027379.1	66351089	66363903	+	--	--	K09338 homeobox-leucine zipper protein | (RefSeq) homeobox-leucine zipper protein MERISTEM L1 (A)	--	hypothetical protein IFM89_035728 [Coptis chinensis]	ROC3_ORYSI RecName: Full=Homeobox-leucine zipper protein ROC3; AltName: Full=GLABR 2-like homeobox protein 3; AltName: Full=HD-ZIP protein ROC3; AltName: Full=Homeodomain transcription factor ROC3; AltName: Full=Protein RICE OUTERMOST CELL-SPECIFIC 3;	A0A835GZW9_9MAGN RecName: Full=F-box domain-containing protein {ECO:0000259|PROSITE:PS50181};	--	GO:0005634,nucleus; GO:0003677,DNA binding; GO:0000981,DNA-binding transcription factor activity, RNA polymerase II-specific; GO:0008289,lipid binding; GO:0003674,molecular_function; GO:0003676,nucleic acid binding; GO:0005488,binding; GO:0097159,organic cyclic compound binding; GO:1901363,heterocyclic compound binding; GO:0003700,DNA-binding transcription factor activity; GO:0140110,transcriptio…	--	HB-other	TF	HB->HB-other
IFM89_028656	14.1469	23.1392	27.6609	61.0298	44.3417	104.951	192	339	421	970	915	1408	1.61051	5.88754e-06	0.000393578	up	CM027385.1	79288733	79290089	-	IFM89_028656	--	K08235 xyloglucan:xyloglucosyl transferase [EC:2.4.1.207] | (RefSeq) xyloglucan endotransglucosylase/hydrolase 2-like (A)	--	hypothetical protein IFM89_028656, partial [Coptis chinensis]	XTH1_DIOKA RecName: Full=Xyloglucan endotransglucosylase protein 1 {ECO:0000305}; Short=XET protein 1 {ECO:0000305}; EC=2.4.1.207 {ECO:0000255|RuleBase:RU361120, ECO:0000269|PubMed:25849978}; AltName: Full=DkXTH1 {ECO:0000303|PubMed:23265513, ECO:0000303|PubMed:25849978, ECO:0000303|PubMed:28155115}; AltName: Full=Xyloglucan endotransglucosylase/hydrolase protein 1 {ECO:0000305}; Short=XTH protei…	A0A835LER8_9MAGN RecName: Full=Xyloglucan endotransglucosylase/hydrolase {ECO:0000256|RuleBase:RU361120}; EC=2.4.1.207 {ECO:0000256|RuleBase:RU361120}; Flags: Fragment;	--	GO:0048046,apoplast; GO:0004553,hydrolase activity, hydrolyzing O-glycosyl compounds; GO:0016762,xyloglucan:xyloglucosyl transferase activity; GO:0042546,cell wall biogenesis; GO:0071555,cell wall organization; GO:0009835,fruit ripening; GO:0010411,xyloglucan metabolic process; GO:0003674,molecular_function; GO:0003824,catalytic activity; GO:0016787,hydrolase activity; GO:0016798,hydrolase activi…	PF00722.24:Glycosyl hydrolases family 16	--	--	--
IFM89_021490	296.015	341.223	245.539	109.162	150.887	196.208	4858	6045	4519	2098	3765	3183	-1.03455	6.00912e-06	0.000400422	down	CM027384.1	95985424	95986446	+	IFM89_021490	--	--	--	hypothetical protein IFM89_021490 [Coptis chinensis]	FBK30_ARATH RecName: Full=F-box/kelch-repeat protein At1g80440;	A0A835LN29_9MAGN RecName: Full=F-box domain-containing protein {ECO:0000259|SMART:SM00256};	FOG: Kelch repeat	GO:0005829,cytosol; GO:0019005,SCF ubiquitin ligase complex; GO:0080037,negative regulation of cytokinin-activated signaling pathway; GO:2000762,regulation of phenylpropanoid metabolic process; GO:0007154,cell communication; GO:0007165,signal transduction; GO:0008150,biological_process; GO:0009719,response to endogenous stimulus; GO:0009725,response to hormone; GO:0009735,response to cytokinin; G…	PF01344.28:Kelch motif	--	--	--
IFM89_032926	1.948	2.0623	2.0844	5.3228	5.0149	5.743	35	40	42	112	137	102	1.3128	6.78181e-06	0.00043928	up	CM027380.1	18578910	18581907	+	IFM89_032926	--	K06123 1-acylglycerone phosphate reductase [EC:1.1.1.101] | (RefSeq) hypothetical protein (A)	ko00564: Glycerophospholipid metabolism; ko00565: Ether lipid metabolism; ko01100: Metabolic pathways	hypothetical protein IFM89_032926 [Coptis chinensis]	HSDA_SESIN RecName: Full=11-beta-hydroxysteroid dehydrogenase A {ECO:0000305}; EC=1.1.1.- {ECO:0000269|PubMed:11950969, ECO:0000269|PubMed:15331088}; AltName: Full=17-beta-hydroxysteroid dehydrogenase A {ECO:0000305}; EC=1.1.1.62 {ECO:0000269|PubMed:11950969, ECO:0000269|PubMed:15331088}; AltName: Full=Seed oil body protein 2 {ECO:0000303|PubMed:11950969, ECO:0000303|PubMed:15331088}; AltName: Fu…	A0A835I6B9_9MAGN SubName: Full=Uncharacterized protein {ECO:0000313|EMBL:KAF9611526.1};	1-Acyl dihydroxyacetone phosphate reductase and related dehydrogenases	GO:0016021,integral component of membrane; GO:0005811,lipid droplet; GO:0070523,11-beta-hydroxysteroid dehydrogenase (NAD+) activity; GO:0070524,11-beta-hydroxysteroid dehydrogenase (NADP+) activity; GO:0044594,17-beta-hydroxysteroid dehydrogenase (NAD+) activity; GO:0003674,molecular_function; GO:0003824,catalytic activity; GO:0003845,11-beta-hydroxysteroid dehydrogenase [NAD(P)] activity; GO:00…	PF00106.28:short chain dehydrogenase	--	--	--
IFM89_005217	30.1438	40.9091	45.6979	92.6852	60.865	104.07	957	1402	1627	3446	2938	3266	1.05646	7.28228e-06	0.000468786	up	CM027384.1	92166448	92168787	-	IFM89_005217	--	K23136 fraxetin 5-hydroxylase [EC:1.14.14.164] | (RefSeq) cytochrome P450 CYP82D47-like (A)	ko00999: Biosynthesis of various plant secondary metabolites; ko01110: Biosynthesis of secondary metabolites	hypothetical protein IFM89_005217 [Coptis chinensis]	C82D6_SINHE RecName: Full=Demethylepipodophyllotoxin synthase {ECO:0000303|PubMed:26359402}; EC=1.14.14.132 {ECO:0000269|PubMed:26359402}; AltName: Full=Cytochrome P450 family 82 subfamily D polypeptide 61 {ECO:0000303|PubMed:26359402};	A0A835H2Y8_9MAGN SubName: Full=Uncharacterized protein {ECO:0000313|EMBL:KAF9591636.1};	Cytochrome P450 CYP2 subfamily	GO:0016021,integral component of membrane; GO:0020037,heme binding; GO:0005506,iron ion binding; GO:0004497,monooxygenase activity; GO:0016705,oxidoreductase activity, acting on paired donors, with incorporation or reduction of molecular oxygen; GO:0019438,aromatic compound biosynthetic process; GO:0009699,phenylpropanoid biosynthetic process; GO:0003674,molecular_function; GO:0005488,binding; GO…	PF00067.25:Cytochrome P450	--	--	--
IFM89_032113	32.2097	25.2523	47.0755	151.842	90.1782	62.8295	989	837	1621	5460	4210	1907	1.45697	8.20651e-06	0.00052504	up	CM027378.1	2444304	2452593	-	IFM89_032113	--	K21692 methyltetrahydroprotoberberine 14-monooxygenase [EC:1.14.14.97] | (RefSeq) methyltetrahydroprotoberberine 14-monooxygenase (A)	ko00950: Isoquinoline alkaloid biosynthesis; ko01100: Metabolic pathways; ko01110: Biosynthesis of secondary metabolites	hypothetical protein IFM89_032113 [Coptis chinensis]	MSH_PAPSO RecName: Full=Methyltetrahydroprotoberberine 14-monooxygenase; EC=1.14.14.97 {ECO:0000269|PubMed:23313486}; AltName: Full=(S)-cis-N-methylstylopine 14-hydroxylase; AltName: Full=(S)-cis-N-methyltetrahydroprotoberberine-14-hydroxylase; AltName: Full=Methyltetrahydroprotoberberine 14-hydroxylase; AltName: Full=N-methylstylopine hydroxylase; Short=MSH;	A0A835IT28_9MAGN SubName: Full=Uncharacterized protein {ECO:0000313|EMBL:KAF9622548.1};	Cytochrome P450 CYP2 subfamily	GO:0016021,integral component of membrane; GO:0020037,heme binding; GO:0005506,iron ion binding; GO:0047084,methyltetrahydroprotoberberine 14-monooxygenase activity; GO:0033075,isoquinoline alkaloid biosynthetic process; GO:0003674,molecular_function; GO:0005488,binding; GO:0046906,tetrapyrrole binding; GO:0097159,organic cyclic compound binding; GO:1901363,heterocyclic compound binding; GO:00431…	PF00067.25:Cytochrome P450	--	--	--
IFM89_011801	1.1282	2.5258	1.3414	7.4664	5.8127	9.4162	12	29	16	93	94	99	2.09292	8.61722e-06	0.000549631	up	CM027384.1	79798474	79802427	+	IFM89_011801	--	K15306 Ran-binding protein 1 | (RefSeq) ran-binding protein 1 homolog b (A)	--	hypothetical protein IFM89_011801 [Coptis chinensis]	EBP1_SOLTU RecName: Full=ERBB-3 BINDING PROTEIN 1 {ECO:0000303|PubMed:17024182}; Short=StEBP1 {ECO:0000303|PubMed:17024182};	A0A835H2K7_9MAGN SubName: Full=Uncharacterized protein {ECO:0000313|EMBL:KAF9592051.1};	Metallopeptidase	GO:0005634,nucleus; GO:0003723,RNA binding; GO:0009734,auxin-activated signaling pathway; GO:0044843,cell cycle G1/S phase transition; GO:0051302,regulation of cell division; GO:0001558,regulation of cell growth; GO:0006364,rRNA processing; GO:0003674,molecular_function; GO:0003676,nucleic acid binding; GO:0005488,binding; GO:0097159,organic cyclic compound binding; GO:1901363,heterocyclic compou…	--	--	--	--
IFM89_008416	2.8732	3.2402	2.4506	8.2847	5.7786	6.8241	69	84	66	233	211	162	1.19969	9.06586e-06	0.000574731	up	CM027383.1	1363945	1366376	-	IFM89_008416	--	K22846 S-sulfo-L-cysteine synthase (O-acetyl-L-serine-dependent) [EC:2.5.1.144] | (RefSeq) probable arabinosyltransferase ARAD1 (A)	ko00270: Cysteine and methionine metabolism; ko01100: Metabolic pathways; ko01230: Biosynthesis of amino acids	hypothetical protein IFM89_008416 [Coptis chinensis]	ARAD1_ARATH RecName: Full=Probable arabinosyltransferase ARAD1; EC=2.4.2.-; AltName: Full=Arabinan alpha-1,5-arabinosyltransferase; AltName: Full=L-Arabinosyltransferase; AltName: Full=Protein ARABINAN DEFICIENT 1;	A0A835HDQ2_9MAGN RecName: Full=Exostosin domain-containing protein {ECO:0000259|Pfam:PF03016};	Acetylglucosaminyltransferase EXT1/exostosin 1	GO:0005768,endosome; GO:0005794,Golgi apparatus; GO:0000139,Golgi membrane; GO:0000138,Golgi trans cisterna; GO:0016021,integral component of membrane; GO:0005802,trans-Golgi network; GO:0016757,glycosyltransferase activity; GO:0071555,cell wall organization; GO:0045489,pectin biosynthetic process; GO:0006486,protein glycosylation; GO:0003674,molecular_function; GO:0003824,catalytic activity; GO:…	PF03016.18:Exostosin family	--	--	--
novel.6112	2.8974	5.2147	2.6574	11.8756	9.7458	16.414	35	68	36	168	179	196	1.7328	9.11435e-06	0.000576055	up	CM027383.1	77788842	77789594	.	--	--	--	--	--	--	--	--	--	--	--	--	--
IFM89_013261	7.2982	5.9257	9.3407	23.0215	14.7389	16.069	170	149	244	628	522	370	1.16773	9.78241e-06	0.000603312	up	CM027377.1	2227481	2232266	-	IFM89_013261	--	K09338 homeobox-leucine zipper protein | (RefSeq) homeobox-leucine zipper protein ATHB-13-like (A)	--	hypothetical protein IFM89_013261 [Coptis chinensis]	--	A0A835IWS1_9MAGN SubName: Full=Uncharacterized protein {ECO:0000313|EMBL:KAF9624723.1};	--	--	PF01497.21:Periplasmic binding protein	--	--	--
IFM89_037705	39.5505	46.8601	23.5116	16.8861	13.8545	9.5677	276	353	184	138	147	66	-1.53003	9.91323e-06	0.000606335	down	CM027379.1	118356664	118357098	-	IFM89_037705	--	K14638 solute carrier family 15 (peptide/histidine transporter), member 3/4 | (RefSeq) protein NRT1/ PTR FAMILY 5.10-like (A)	--	hypothetical protein IFM89_037705 [Coptis chinensis]	PTR10_ARATH RecName: Full=Protein NRT1/ PTR FAMILY 5.16; Short=AtNPF5.16;	A0A835IJR8_9MAGN SubName: Full=Uncharacterized protein {ECO:0000313|EMBL:KAF9617642.1};	H+/oligopeptide symporter	GO:0016021,integral component of membrane; GO:0009705,plant-type vacuole membrane; GO:0071916,dipeptide transmembrane transporter activity; GO:0080054,low-affinity nitrate transmembrane transporter activity; GO:0042937,tripeptide transmembrane transporter activity; GO:0015706,nitrate transmembrane transport; GO:0003674,molecular_function; GO:0005215,transporter activity; GO:0022857,transmembrane …	--	--	--	--
IFM89_033338	5.1946	5.399	8.8122	26.3977	13.9159	35.1188	41	46	78	244	167	274	1.86966	1.03401e-05	0.000626931	up	CM027383.1	35167595	35172958	-	IFM89_033338	--	K11252 histone H2B | (RefSeq) histone H2B.3-like (A)	--	hypothetical protein IFM89_033338 [Coptis chinensis]	H2B3_SOLLC RecName: Full=Histone H2B.3; AltName: Full=LeH2B-3; Flags: Fragment;	A0A835HLC7_9MAGN RecName: Full=Histone H2B {ECO:0000256|RuleBase:RU000451};	Histone H2B	GO:0000786,nucleosome; GO:0005634,nucleus; GO:0003677,DNA binding; GO:0046982,protein heterodimerization activity; GO:0030527,structural constituent of chromatin; GO:0006334,nucleosome assembly; GO:0003674,molecular_function; GO:0003676,nucleic acid binding; GO:0005488,binding; GO:0097159,organic cyclic compound binding; GO:1901363,heterocyclic compound binding; GO:0005515,protein binding; GO:004…	PF00125.27:Core histone H2A/H2B/H3/H4	--	--	--
IFM89_016955	78.1185	59.2261	51.8433	30.0261	24.9667	11.7227	391	320	291	176	190	58	-1.58495	1.12411e-05	0.000669876	down	CM027381.1	78166337	78166648	+	IFM89_016955	--	K03676 glutaredoxin 3 | (RefSeq) monothiol glutaredoxin-S2-like (A)	--	hypothetical protein IFM89_016955 [Coptis chinensis]	GRXS2_ARATH RecName: Full=Monothiol glutaredoxin-S2; Short=AtGrxS2; AltName: Full=Protein ROXY 10;	A0A835LRF4_9MAGN RecName: Full=Glutaredoxin domain-containing protein {ECO:0000259|Pfam:PF00462};	Glutaredoxin and related proteins	GO:0005737,cytoplasm; GO:0051537,2 iron, 2 sulfur cluster binding; GO:0097573,glutathione oxidoreductase activity; GO:0046872,metal ion binding; GO:0000122,negative regulation of transcription by RNA polymerase II; GO:0003674,molecular_function; GO:0005488,binding; GO:0051536,iron-sulfur cluster binding; GO:0051540,metal cluster binding; GO:0003824,catalytic activity; GO:0015035,protein-disulfide…	PF00462.27:Glutaredoxin	--	--	--
novel.4019	1.6511	3.6944	1.812	0.5206	0.7518	0.5139	65	157	80	24	45	20	-2.0784	1.19687e-05	0.000708583	down	CM027381.1	10708777	10713440	+	--	--	K12448 UDP-arabinose 4-epimerase [EC:5.1.3.5] | (RefSeq) UDP-arabinose 4-epimerase 1-like (A)	ko00520: Amino sugar and nucleotide sugar metabolism; ko01100: Metabolic pathways; ko01250: Biosynthesis of nucleotide sugars	hypothetical protein IFM89_024992 [Coptis chinensis]	MAIL1_ARATH RecName: Full=Protein MAIN-LIKE 1 {ECO:0000303|PubMed:24635680};	A0A835LX18_9MAGN RecName: Full=PMD domain-containing protein {ECO:0000259|Pfam:PF10536};	--	GO:0005634,nucleus; GO:0008483,transaminase activity; GO:0010073,meristem maintenance; GO:0010082,regulation of root meristem growth; GO:0003674,molecular_function; GO:0003824,catalytic activity; GO:0016740,transferase activity; GO:0016769,transferase activity, transferring nitrogenous groups; GO:0008150,biological_process; GO:0009888,tissue development; GO:0032501,multicellular organismal proces…	PF10536.12:Plant mobile domain	--	--	--
IFM89_013505	151.037	154.864	211.322	525.894	311.94	294.684	7189	7957	11280	29314	22575	13865	1.04395	1.19926e-05	0.000708583	up	CM027384.1	87037760	87047244	+	IFM89_013505	--	K00549 5-methyltetrahydropteroyltriglutamate--homocysteine methyltransferase [EC:2.1.1.14] | (RefSeq) 5-methyltetrahydropteroyltriglutamate--homocysteine methyltransferase (A)	ko00270: Cysteine and methionine metabolism; ko00450: Selenocompound metabolism; ko01100: Metabolic pathways; ko01110: Biosynthesis of secondary metabolites; ko01230: Biosynthesis of amino acids	hypothetical protein IFM89_013505 [Coptis chinensis]	METE_CATRO RecName: Full=5-methyltetrahydropteroyltriglutamate--homocysteine methyltransferase; EC=2.1.1.14; AltName: Full=Cobalamin-independent methionine synthase isozyme; AltName: Full=Vitamin-B12-independent methionine synthase isozyme;	A0A835H522_9MAGN RecName: Full=5-methyltetrahydropteroyltriglutamate--homocysteine S-methyltransferase {ECO:0000256|ARBA:ARBA00012034}; EC=2.1.1.14 {ECO:0000256|ARBA:ARBA00012034};	Methionine synthase II (cobalamin-independent)	GO:0005737,cytoplasm; GO:0003871,5-methyltetrahydropteroyltriglutamate-homocysteine S-methyltransferase activity; GO:0008270,zinc ion binding; GO:0009086,methionine biosynthetic process; GO:0032259,methylation; GO:0003674,molecular_function; GO:0003824,catalytic activity; GO:0008168,methyltransferase activity; GO:0008172,S-methyltransferase activity; GO:0016740,transferase activity; GO:0016741,tr…	PF01717.21:Cobalamin-independent synthase, Catalytic domain	--	--	--
IFM89_012607	90.2831	76.7864	129.34	373.261	245.871	160.12	2552	2343	4100	12356	10567	4474	1.30776	1.20306e-05	0.000708819	up	CM027378.1	3346613	3352373	+	IFM89_012607	--	K21692 methyltetrahydroprotoberberine 14-monooxygenase [EC:1.14.14.97] | (RefSeq) methyltetrahydroprotoberberine 14-monooxygenase (A)	ko00950: Isoquinoline alkaloid biosynthesis; ko01100: Metabolic pathways; ko01110: Biosynthesis of secondary metabolites	hypothetical protein IFM89_012607 [Coptis chinensis]	MSH_PAPSO RecName: Full=Methyltetrahydroprotoberberine 14-monooxygenase; EC=1.14.14.97 {ECO:0000269|PubMed:23313486}; AltName: Full=(S)-cis-N-methylstylopine 14-hydroxylase; AltName: Full=(S)-cis-N-methyltetrahydroprotoberberine-14-hydroxylase; AltName: Full=Methyltetrahydroprotoberberine 14-hydroxylase; AltName: Full=N-methylstylopine hydroxylase; Short=MSH;	A0A835IMA2_9MAGN SubName: Full=Uncharacterized protein {ECO:0000313|EMBL:KAF9620430.1};	Cytochrome P450 CYP2 subfamily	GO:0016021,integral component of membrane; GO:0020037,heme binding; GO:0005506,iron ion binding; GO:0047084,methyltetrahydroprotoberberine 14-monooxygenase activity; GO:0033075,isoquinoline alkaloid biosynthetic process; GO:0003674,molecular_function; GO:0005488,binding; GO:0046906,tetrapyrrole binding; GO:0097159,organic cyclic compound binding; GO:1901363,heterocyclic compound binding; GO:00431…	PF00067.25:Cytochrome P450	--	--	--
novel.505	8.7013	4.64	0.2934	0	0.2164	0.2589	238	137	9	0	9	7	-4.92171	1.21025e-05	0.000711048	down	CM027377.1	52487190	52502488	-	--	--	K14175 (3S,6E)-nerolidol synthase [EC:4.2.3.48] | (RefSeq) (3S,6E)-nerolidol synthase 1-like (A)	ko00909: Sesquiterpenoid and triterpenoid biosynthesis; ko01100: Metabolic pathways	uncharacterized protein LOC120003113 [Tripterygium wilfordii]	BOB2_ARATH RecName: Full=Protein BOBBER 2;	A0A2N9GED7_FAGSY RecName: Full=RNA-directed DNA polymerase {ECO:0000256|ARBA:ARBA00012493}; EC=2.7.7.49 {ECO:0000256|ARBA:ARBA00012493};	FOG: Transposon-encoded proteins with TYA, reverse transcriptase, integrase domains in various combinations	GO:0005737,cytoplasm; GO:0051082,unfolded protein binding; GO:0006457,protein folding; GO:0003674,molecular_function; GO:0005488,binding; GO:0005515,protein binding; GO:0008150,biological_process; GO:0009987,cellular process; GO:0005575,cellular_component; GO:0005622,intracellular anatomical structure; GO:0110165,cellular anatomical entity	PF13456.9:Reverse transcriptase-like	--	--	--
IFM89_033610	3.7779	5.8329	5.0531	14.7318	11.9267	13.886	30	50	45	137	144	109	1.37772	1.24606e-05	0.000725955	up	CM027380.1	86378605	86380924	-	IFM89_033610	--	--	--	hypothetical protein IFM89_033610 [Coptis chinensis]	--	A0A835M5M9_9MAGN SubName: Full=Uncharacterized protein {ECO:0000313|EMBL:KAF9611606.1};	--	--	PF12795.10:Mechanosensitive ion channel porin domain	--	--	--
IFM89_021599	10.306	10.9331	13.785	26.4011	24.0521	28.5872	62	71	93	186	220	170	1.08602	1.36063e-05	0.000781779	up	CM027379.1	112716	113188	-	IFM89_021599	--	--	--	hypothetical protein IFM89_021599 [Coptis chinensis]	--	A0A835IFY4_9MAGN SubName: Full=Uncharacterized protein {ECO:0000313|EMBL:KAF9615028.1};	--	GO:0016021,integral component of membrane; GO:0005575,cellular_component; GO:0016020,membrane; GO:0031224,intrinsic component of membrane; GO:0110165,cellular anatomical entity	--	--	--	--
IFM89_038463	38.181	36.8272	53.3635	136.932	87.5786	70.3541	1165	1213	1826	4893	4063	2122	1.11309	1.62204e-05	0.000909433	up	CM027384.1	8811562	8814983	+	IFM89_038463	--	K22395 cinnamyl-alcohol dehydrogenase [EC:1.1.1.195] | (RefSeq) berberine bridge enzyme-like 13 (A)	ko00940: Phenylpropanoid biosynthesis; ko01100: Metabolic pathways; ko01110: Biosynthesis of secondary metabolites	hypothetical protein IFM89_038463 [Coptis chinensis]	STOX_BERWI RecName: Full=Tetrahydroberberine oxidase {ECO:0000303|PubMed:3402447}; Short=THB oxidase {ECO:0000305}; EC=1.3.3.8 {ECO:0000269|PubMed:21327819, ECO:0000269|PubMed:3402447}; AltName: Full=(S)-tetrahydroprotoberberine oxidase {ECO:0000303|PubMed:21327819}; Short=BwSTOX {ECO:0000303|PubMed:21327819}; Flags: Precursor;	A0A835H9P5_9MAGN RecName: Full=FAD-binding PCMH-type domain-containing protein {ECO:0000259|PROSITE:PS51387};	--	GO:0071949,FAD binding; GO:0050328,tetrahydroberberine oxidase activity; GO:0000166,nucleotide binding; GO:0003674,molecular_function; GO:0005488,binding; GO:0036094,small molecule binding; GO:0043167,ion binding; GO:0043168,anion binding; GO:0050660,flavin adenine dinucleotide binding; GO:0097159,organic cyclic compound binding; GO:1901265,nucleoside phosphate binding; GO:1901363,heterocyclic co…	PF01565.26:FAD binding domain	--	--	--
IFM89_004531	77.7263	63.5676	135.073	208.97	198.072	313.095	606	535	1181	1908	2348	2413	1.29862	1.63497e-05	0.000911781	up	CM027385.1	83746480	83746965	+	IFM89_004531	--	K13449 pathogenesis-related protein 1 | (RefSeq) pathogenesis-related protein 1-like (A)	ko04016: MAPK signaling pathway - plant; ko04075: Plant hormone signal transduction; ko04626: Plant-pathogen interaction	hypothetical protein IFM89_004531 [Coptis chinensis]	PRB1_TOBAC RecName: Full=Basic form of pathogenesis-related protein 1; Short=PRP 1; Flags: Precursor;	A0A835GUQ0_9MAGN RecName: Full=SCP domain-containing protein {ECO:0000259|SMART:SM00198};	Defense-related protein containing SCP domain	GO:0005615,extracellular space; GO:0006952,defense response; GO:0009607,response to biotic stimulus; GO:0006950,response to stress; GO:0008150,biological_process; GO:0050896,response to stimulus; GO:0005575,cellular_component; GO:0005576,extracellular region; GO:0110165,cellular anatomical entity	PF00188.29:Cysteine-rich secretory protein family	--	--	--
IFM89_023664	75.76	71.5102	124.302	316.781	186.409	168.479	2325	2369	4278	11385	8698	5111	1.21968	1.67693e-05	0.000930205	up	CM027381.1	96837484	96841101	-	IFM89_023664	--	K00600 glycine hydroxymethyltransferase [EC:2.1.2.1] | (RefSeq) serine hydroxymethyltransferase 4 (A)	ko00260: Glycine, serine and threonine metabolism; ko00460: Cyanoamino acid metabolism; ko00630: Glyoxylate and dicarboxylate metabolism; ko00670: One carbon pool by folate; ko01100: Metabolic pathways; ko01110: Biosynthesis of secondary metabolites; ko01200: Carbon metabolism; ko01230: Biosynthesis of amino acids; ko01240: Biosynthesis of cofactors	hypothetical protein IFM89_023664 [Coptis chinensis]	GLYC4_ARATH RecName: Full=Serine hydroxymethyltransferase 4 {ECO:0000303|PubMed:10806255}; Short=AtSHMT4 {ECO:0000303|PubMed:31873125}; EC=2.1.2.1 {ECO:0000269|PubMed:31873125}; AltName: Full=Glycine hydroxymethyltransferase 4 {ECO:0000305}; AltName: Full=Serine methylase 4 {ECO:0000305};	A0A835HVX2_9MAGN RecName: Full=Serine hydroxymethyltransferase {ECO:0000256|RuleBase:RU000585}; EC=2.1.2.1 {ECO:0000256|RuleBase:RU000585};	Glycine/serine hydroxymethyltransferase	GO:0005737,cytoplasm; GO:0005829,cytosol; GO:0005886,plasma membrane; GO:0009506,plasmodesma; GO:0004372,glycine hydroxymethyltransferase activity; GO:0030170,pyridoxal phosphate binding; GO:1901149,salicylic acid binding; GO:0070905,serine binding; GO:0008270,zinc ion binding; GO:0007623,circadian rhythm; GO:0046655,folic acid metabolic process; GO:0019264,glycine biosynthetic process from serin…	PF00464.22:Serine hydroxymethyltransferase	--	--	--
IFM89_024126	61.2906	42.8707	89.1099	193.628	144.072	124.469	939	709	1531	3474	3356	1885	1.17252	1.88827e-05	0.00103099	up	CM027384.1	65910435	65912748	-	IFM89_024126	--	K11968 ariadne-1 [EC:2.3.2.31] | (RefSeq) probable E3 ubiquitin-protein ligase ARI2 isoform X1 (A)	--	hypothetical protein IFM89_024126 [Coptis chinensis]	HBL2_SOLLC RecName: Full=Non-symbiotic hemoglobin 2; AltName: Full=Hb2; AltName: Full=SOLly GLB2;	A0A835H894_9MAGN RecName: Full=GLOBIN domain-containing protein {ECO:0000259|PROSITE:PS01033};	Globins and related hemoproteins	GO:0020037,heme binding; GO:0046872,metal ion binding; GO:0019825,oxygen binding; GO:0006631,fatty acid metabolic process; GO:0019432,triglyceride biosynthetic process; GO:0003674,molecular_function; GO:0005488,binding; GO:0046906,tetrapyrrole binding; GO:0097159,organic cyclic compound binding; GO:1901363,heterocyclic compound binding; GO:0043167,ion binding; GO:0043169,cation binding; GO:003609…	PF00042.25:Globin	--	--	--
IFM89_001167	11.2395	19.728	21.3305	40.8208	33.4354	44.0972	304	576	647	1293	1375	1179	1.09255	1.91651e-05	0.00104367	up	CM027378.1	824383	827571	-	IFM89_001167	--	--	--	hypothetical protein IFM89_001167 [Coptis chinensis]	PRP4_ARATH RecName: Full=Proline-rich protein 4; Short=AtPRP4; Flags: Precursor;	A0A835M977_9MAGN SubName: Full=Uncharacterized protein {ECO:0000313|EMBL:KAF9618444.1};	--	GO:0005576,extracellular region; GO:0005575,cellular_component; GO:0110165,cellular anatomical entity	PF01190.20:Pollen protein Ole e 1 like	--	--	--
IFM89_000614	152.004	172.118	294.7	798.603	431.832	411.974	2141	2617	4655	13173	9248	5736	1.32101	1.98455e-05	0.00107511	up	CM027383.1	25657242	25658278	-	IFM89_000614	--	K13382 (S)-norcoclaurine synthase [EC:4.2.1.78] | (RefSeq) uncharacterized protein LOC113326100 (A)	ko00950: Isoquinoline alkaloid biosynthesis; ko01100: Metabolic pathways; ko01110: Biosynthesis of secondary metabolites	hypothetical protein IFM89_000614 [Coptis chinensis]	NCS2_COPJA RecName: Full=S-norcoclaurine synthase 2; EC=4.2.1.78 {ECO:0000250|UniProtKB:Q67A25}; AltName: Full=Pathogenesis related protein 10A; Short=CjPR10A; Flags: Precursor;	A0A835LQ64_9MAGN RecName: Full=Bet_v_1 domain-containing protein {ECO:0000259|Pfam:PF00407};	--	GO:0050474,(S)-norcoclaurine synthase activity; GO:0009820,alkaloid metabolic process; GO:0006952,defense response; GO:0003674,molecular_function; GO:0003824,catalytic activity; GO:0016829,lyase activity; GO:0016835,carbon-oxygen lyase activity; GO:0016836,hydro-lyase activity; GO:0006807,nitrogen compound metabolic process; GO:0008150,biological_process; GO:0008152,metabolic process; GO:0071704,…	PF00407.22:Pathogenesis-related protein Bet v 1 family	--	--	--
IFM89_018471	1.6519	3.8673	1.9015	0.7694	0.642	0.9267	110	278	142	60	65	61	-1.75634	2.01868e-05	0.00108544	down	CM027384.1	96301473	96308907	+	IFM89_018471	--	K01102 pyruvate dehydrogenase phosphatase [EC:3.1.3.43] | (RefSeq) probable protein phosphatase 2C 38 (A)	--	hypothetical protein IFM89_018471 [Coptis chinensis]	P2C60_ORYSJ RecName: Full=Probable protein phosphatase 2C 60; Short=OsPP2C60; EC=3.1.3.16;	A0A835H449_9MAGN RecName: Full=Protein-serine/threonine phosphatase {ECO:0000256|ARBA:ARBA00013081}; EC=3.1.3.16 {ECO:0000256|ARBA:ARBA00013081};	Protein phosphatase 2C/pyruvate dehydrogenase (lipoamide) phosphatase	GO:0016021,integral component of membrane; GO:0046872,metal ion binding; GO:0017018,myosin phosphatase activity; GO:0004722,protein serine/threonine phosphatase activity; GO:0035970,peptidyl-threonine dephosphorylation; GO:0003674,molecular_function; GO:0005488,binding; GO:0043167,ion binding; GO:0043169,cation binding; GO:0003824,catalytic activity; GO:0004721,phosphoprotein phosphatase activity…	PF00481.24:Protein phosphatase 2C	--	--	--
IFM89_028800	14.7922	14.3447	25.1895	58.7621	38.525	36.5348	299	313	571	1391	1184	730	1.21409	2.05521e-05	0.00109861	up	CM027385.1	82957149	82965032	+	IFM89_028800	--	K00799 glutathione S-transferase [EC:2.5.1.18] | (RefSeq) glutathione S-transferase F10-like (A)	ko00480: Glutathione metabolism; ko01100: Metabolic pathways	hypothetical protein IFM89_028800 [Coptis chinensis]	GSTF9_ARATH RecName: Full=Glutathione S-transferase F9 {ECO:0000303|PubMed:12090627}; Short=AtGSTF9 {ECO:0000303|PubMed:12090627}; EC=2.5.1.18 {ECO:0000269|PubMed:12090627, ECO:0000269|PubMed:16538523}; AltName: Full=AtGSTF7 {ECO:0000303|PubMed:12090627}; AltName: Full=GST class-phi member 9 {ECO:0000303|PubMed:12090627, ECO:0000303|PubMed:29732642};	A0A835GYJ6_9MAGN RecName: Full=Glutathione transferase {ECO:0000256|ARBA:ARBA00012452}; EC=2.5.1.18 {ECO:0000256|ARBA:ARBA00012452};	Glutathione S-transferase	GO:0048046,apoplast; GO:0009507,chloroplast; GO:0009570,chloroplast stroma; GO:0005737,cytoplasm; GO:0005829,cytosol; GO:0005777,peroxisome; GO:0000325,plant-type vacuole; GO:0005886,plasma membrane; GO:0009506,plasmodesma; GO:0009579,thylakoid; GO:0005507,copper ion binding; GO:0043295,glutathione binding; GO:0004602,glutathione peroxidase activity; GO:0004364,glutathione transferase activity; G…	PF02798.23:Glutathione S-transferase, N-terminal domain	--	--	--
novel.3994	5.447	5.5609	8.3265	1.6849	3.1987	2.7833	196	216	336	71	175	99	-1.41405	2.07726e-05	0.00110299	down	CM027381.1	7408055	7410297	-	--	--	--	--	--	--	--	--	--	--	--	--	--
novel.5766	38.5927	50.2725	42.6693	16.4381	22.0062	28.6552	421	592	522	210	365	309	-1.05568	2.15131e-05	0.0011311	down	CM027383.1	26460311	26460990	.	--	--	--	--	hypothetical protein FNV43_RR24782 [Rhamnella rubrinervis]	DVL11_ARATH RecName: Full=Small polypeptide DEVIL 11 {ECO:0000303|PubMed:14871303}; AltName: Full=Small polypeptide ROTUNDIFOLIA LIKE 8 {ECO:0000303|PubMed:15125775}; Short=Small polypeptide ROT-FOUR-LIKE 8 {ECO:0000303|PubMed:15125775};	A0A8K0DSY5_9ROSA SubName: Full=Uncharacterized protein {ECO:0000313|EMBL:KAF3433679.1};	--	GO:0016021,integral component of membrane; GO:0005886,plasma membrane; GO:0008285,negative regulation of cell population proliferation; GO:0048367,shoot system development; GO:0008150,biological_process; GO:0008283,cell population proliferation; GO:0009987,cellular process; GO:0042127,regulation of cell population proliferation; GO:0048519,negative regulation of biological process; GO:0048523,neg…	PF08137.15:DVL family	--	--	--
IFM89_006109	11.3408	5.3631	8.2033	20.3161	23.9937	20.1375	143	73	116	300	460	251	1.29147	2.25695e-05	0.00116807	up	CM027385.1	80238389	80239174	+	IFM89_006109	--	K08912 light-harvesting complex II chlorophyll a/b binding protein 1 | (RefSeq) chlorophyll a-b binding protein of LHCII type 1-like (A)	ko00196: Photosynthesis - antenna proteins; ko01100: Metabolic pathways	hypothetical protein IFM89_006109 [Coptis chinensis]	CB2A_SPIOL RecName: Full=Chlorophyll a-b binding protein, chloroplastic; AltName: Full=LHCII type I CAB; Short=LHCP; Flags: Precursor;	A0A835GUL5_9MAGN RecName: Full=Chlorophyll a-b binding protein, chloroplastic {ECO:0000256|RuleBase:RU363080};	--	GO:0009535,chloroplast thylakoid membrane; GO:0016021,integral component of membrane; GO:0009522,photosystem I; GO:0009523,photosystem II; GO:0016168,chlorophyll binding; GO:0046872,metal ion binding; GO:0009765,photosynthesis, light harvesting; GO:0003674,molecular_function; GO:0005488,binding; GO:0046906,tetrapyrrole binding; GO:0097159,organic cyclic compound binding; GO:1901363,heterocyclic c…	PF00504.24:Chlorophyll A-B binding protein	--	--	--
novel.4106	2.4795	6.549	1.7724	0.6824	0.5256	1.078	121	345	97	39	39	52	-2.3325	2.26832e-05	0.00117105	down	CM027381.1	33468959	33472604	-	--	--	--	--	--	--	--	--	--	--	--	--	--
IFM89_000506	7.04	7.8514	9.6298	23.7542	22.8815	13.6215	103	124	158	407	509	197	1.2132	2.48758e-05	0.00126855	up	CM027384.1	51526014	51527746	-	IFM89_000506	--	K00430 peroxidase [EC:1.11.1.7] | (RefSeq) peroxidase 21 (A)	ko00940: Phenylpropanoid biosynthesis; ko01100: Metabolic pathways; ko01110: Biosynthesis of secondary metabolites	hypothetical protein IFM89_000506, partial [Coptis chinensis]	PER21_ARATH RecName: Full=Peroxidase 21; Short=Atperox P21; EC=1.11.1.7; AltName: Full=ATP2a/ATP2b; AltName: Full=PRXR5; Flags: Precursor;	A0A835H1N8_9MAGN RecName: Full=Peroxidase {ECO:0000256|RuleBase:RU362060}; EC=1.11.1.7 {ECO:0000256|RuleBase:RU362060}; Flags: Fragment;	--	GO:0009505,plant-type cell wall; GO:0020037,heme binding; GO:0046872,metal ion binding; GO:0004601,peroxidase activity; GO:0050832,defense response to fungus; GO:0042744,hydrogen peroxide catabolic process; GO:0006979,response to oxidative stress; GO:0048511,rhythmic process; GO:0003674,molecular_function; GO:0005488,binding; GO:0046906,tetrapyrrole binding; GO:0097159,organic cyclic compound bin…	PF00141.26:Peroxidase	--	--	--
IFM89_002800	57.3948	53.4776	86.2724	203.717	145.044	106.635	1034	1040	1743	4298	3973	1899	1.12173	2.58275e-05	0.00130957	up	CM027381.1	14642547	14643799	+	IFM89_002800	--	K13383 (RS)-norcoclaurine 6-O-methyltransferase [EC:2.1.1.128] | (RefSeq) (RS)-norcoclaurine 6-O-methyltransferase-like (A)	ko00950: Isoquinoline alkaloid biosynthesis; ko01100: Metabolic pathways; ko01110: Biosynthesis of secondary metabolites	hypothetical protein IFM89_002800 [Coptis chinensis]	COOMT_COPJA RecName: Full=Columbamine O-methyltransferase; Short=CoOMT; EC=2.1.1.118; AltName: Full=Tetrahydrocolumbamine 2-O-methyltransferase; EC=2.1.1.89;	A0A835HQV5_9MAGN SubName: Full=Uncharacterized protein {ECO:0000313|EMBL:KAF9604125.1};	Hydroxyindole-O-methyltransferase and related SAM-dependent methyltransferases	GO:0030778,columbamine O-methyltransferase activity; GO:0008171,O-methyltransferase activity; GO:0046983,protein dimerization activity; GO:0030762,tetrahydrocolumbamine 2-O-methyltransferase activity; GO:0009820,alkaloid metabolic process; GO:0032259,methylation; GO:0003674,molecular_function; GO:0003824,catalytic activity; GO:0008168,methyltransferase activity; GO:0008757,S-adenosylmethionine-de…	PF00891.21:O-methyltransferase domain	--	--	--
IFM89_017984	4.4193	5.516	9.2503	19.8612	18.5102	13.412	95	128	223	500	605	285	1.34684	2.65033e-05	0.00132551	up	CM027381.1	93478358	93481324	+	IFM89_017984	--	K09422 transcription factor MYB, plant | (RefSeq) myb-related protein Myb4 (A)	--	hypothetical protein IFM89_017984 [Coptis chinensis]	MYB30_ORYSJ RecName: Full=Transcription factor MYB30 {ECO:0000305}; Short=OsMYB30 {ECO:0000303|PubMed:18987217};	A0A835HTU9_9MAGN SubName: Full=Uncharacterized protein {ECO:0000313|EMBL:KAF9605641.1};	Transcription factor, Myb superfamily	GO:0005634,nucleus; GO:0003677,DNA binding; GO:0003674,molecular_function; GO:0003676,nucleic acid binding; GO:0005488,binding; GO:0097159,organic cyclic compound binding; GO:1901363,heterocyclic compound binding; GO:0005575,cellular_component; GO:0005622,intracellular anatomical structure; GO:0043226,organelle; GO:0043227,membrane-bounded organelle; GO:0043229,intracellular organelle; GO:0043231…	PF00249.34:Myb-like DNA-binding domain	MYB	TF	MYB->MYB
IFM89_006828	14.7785	20.8282	26.9194	7.1186	11.0491	4.9196	234	356	478	132	266	77	-1.51528	2.66147e-05	0.00132551	down	CM027379.1	31360769	31370887	+	IFM89_006828	--	K01179 endoglucanase [EC:3.2.1.4] | (RefSeq) endoglucanase 9-like (A)	ko00500: Starch and sucrose metabolism; ko01100: Metabolic pathways	hypothetical protein IFM89_006828 [Coptis chinensis]	GUN3_ARATH RecName: Full=Endoglucanase 3; EC=3.2.1.4; AltName: Full=Cellulase 5; Short=AtCEL5; AltName: Full=Endo-1,4-beta glucanase 3; Flags: Precursor;	A0A835ICH6_9MAGN RecName: Full=Cellulase {ECO:0000256|ARBA:ARBA00012601}; EC=3.2.1.4 {ECO:0000256|ARBA:ARBA00012601};	--	GO:0005576,extracellular region; GO:0005794,Golgi apparatus; GO:0009505,plant-type cell wall; GO:0008810,cellulase activity; GO:0071555,cell wall organization; GO:0030245,cellulose catabolic process; GO:0003674,molecular_function; GO:0003824,catalytic activity; GO:0004553,hydrolase activity, hydrolyzing O-glycosyl compounds; GO:0016787,hydrolase activity; GO:0016798,hydrolase activity, acting on …	PF00759.22:Glycosyl hydrolase family 9	--	--	--
novel.5081	7.7127	6.9583	5.1581	2.1625	4.1074	2.4601	536	522	402	176	434	169	-1.26144	2.66283e-05	0.00132551	down	CM027382.1	63136615	63141161	+	--	--	--	--	hypothetical protein IFM89_017630 [Coptis chinensis]	--	A0A835GXZ6_9MAGN SubName: Full=Uncharacterized protein {ECO:0000313|EMBL:KAF9588951.1};	--	GO:0004252,serine-type endopeptidase activity; GO:0006508,proteolysis; GO:0003674,molecular_function; GO:0003824,catalytic activity; GO:0004175,endopeptidase activity; GO:0008233,peptidase activity; GO:0008236,serine-type peptidase activity; GO:0016787,hydrolase activity; GO:0017171,serine hydrolase activity; GO:0140096,catalytic activity, acting on a protein; GO:0006807,nitrogen compound metabol…	--	--	--	--
IFM89_007623	23.4732	23.1067	36.8243	98.5327	51.6628	56.1825	511	543	899	2512	1710	1209	1.21982	2.68522e-05	0.0013303	up	CM027381.1	6400067	6401568	-	IFM89_007623	--	K13383 (RS)-norcoclaurine 6-O-methyltransferase [EC:2.1.1.128] | (RefSeq) (RS)-norcoclaurine 6-O-methyltransferase-like (A)	ko00950: Isoquinoline alkaloid biosynthesis; ko01100: Metabolic pathways; ko01110: Biosynthesis of secondary metabolites	hypothetical protein IFM89_007623 [Coptis chinensis]	COOMT_COPJA RecName: Full=Columbamine O-methyltransferase; Short=CoOMT; EC=2.1.1.118; AltName: Full=Tetrahydrocolumbamine 2-O-methyltransferase; EC=2.1.1.89;	A0A835HU71_9MAGN SubName: Full=Uncharacterized protein {ECO:0000313|EMBL:KAF9604502.1};	Hydroxyindole-O-methyltransferase and related SAM-dependent methyltransferases	GO:0030778,columbamine O-methyltransferase activity; GO:0008171,O-methyltransferase activity; GO:0046983,protein dimerization activity; GO:0030762,tetrahydrocolumbamine 2-O-methyltransferase activity; GO:0009820,alkaloid metabolic process; GO:0032259,methylation; GO:0003674,molecular_function; GO:0003824,catalytic activity; GO:0008168,methyltransferase activity; GO:0008757,S-adenosylmethionine-de…	PF00891.21:O-methyltransferase domain	--	--	--
IFM89_016403	11.9129	15.6554	32.3626	84.2186	51.9307	58.5758	86	122	262	712	570	418	1.61242	2.87613e-05	0.00140265	up	CM027383.1	1008111	1008684	+	IFM89_016403	--	K10781 fatty acyl-ACP thioesterase B [EC:3.1.2.14 3.1.2.21] | (RefSeq) uncharacterized protein LOC113347984 isoform X1 (A)	ko00061: Fatty acid biosynthesis; ko01100: Metabolic pathways; ko01212: Fatty acid metabolism	hypothetical protein IFM89_016403 [Coptis chinensis]	ML423_ARATH RecName: Full=MLP-like protein 423;	A0A835LLV2_9MAGN RecName: Full=Bet_v_1 domain-containing protein {ECO:0000259|SMART:SM01037};	--	GO:0005829,cytosol; GO:0005634,nucleus; GO:0010427,abscisic acid binding; GO:0004864,protein phosphatase inhibitor activity; GO:0038023,signaling receptor activity; GO:0009738,abscisic acid-activated signaling pathway; GO:0006952,defense response; GO:0003674,molecular_function; GO:0005488,binding; GO:0008289,lipid binding; GO:0019840,isoprenoid binding; GO:0031406,carboxylic acid binding; GO:0033…	PF00407.22:Pathogenesis-related protein Bet v 1 family	--	--	--
IFM89_033908	4.4862	5.359	9.7905	35.939	17.5095	15.8845	76	98	186	713	451	266	1.73093	2.87834e-05	0.00140265	up	CM027381.1	9148640	9150350	+	IFM89_033908	--	K15382 solute carrier family 50 (sugar transporter) | (RefSeq) bidirectional sugar transporter SWEET14 (A)	--	hypothetical protein IFM89_033908 [Coptis chinensis]	SWT15_VITVI RecName: Full=Bidirectional sugar transporter SWEET15 {ECO:0000305}; Short=VvSWEET15 {ECO:0000305};	A0A835HWB3_9MAGN RecName: Full=Bidirectional sugar transporter SWEET {ECO:0000256|RuleBase:RU910715};	Multitransmembrane protein	GO:0000139,Golgi membrane; GO:0016021,integral component of membrane; GO:0005887,integral component of plasma membrane; GO:0008515,sucrose transmembrane transporter activity; GO:0051119,sugar transmembrane transporter activity; GO:0008643,carbohydrate transport; GO:0071215,cellular response to abscisic acid stimulus; GO:0071470,cellular response to osmotic stress; GO:0071446,cellular response to …	PF03083.19:Sugar efflux transporter for intercellular exchange	--	--	--
IFM89_019192	21.5112	34.4237	27.2926	7.2517	14.2614	14.4349	499	862	710	197	503	331	-1.29272	3.03776e-05	0.00145318	down	CM027379.1	11586674	11588434	+	IFM89_019192	--	K20617 cytochrome P450 family 71 subfamily A | (RefSeq) cytochrome P450 71A1-like (A)	--	hypothetical protein IFM89_019192 [Coptis chinensis]	C71A1_PERAE RecName: Full=Cytochrome P450 71A1; EC=1.14.-.-; AltName: Full=ARP-2; AltName: Full=CYPLXXIA1;	A0A835M5E5_9MAGN SubName: Full=Uncharacterized protein {ECO:0000313|EMBL:KAF9614529.1};	Cytochrome P450 CYP2 subfamily	GO:0005789,endoplasmic reticulum membrane; GO:0016021,integral component of membrane; GO:0020037,heme binding; GO:0005506,iron ion binding; GO:0004497,monooxygenase activity; GO:0016705,oxidoreductase activity, acting on paired donors, with incorporation or reduction of molecular oxygen; GO:0009835,fruit ripening; GO:0003674,molecular_function; GO:0005488,binding; GO:0046906,tetrapyrrole binding;…	PF00067.25:Cytochrome P450	--	--	--
IFM89_001628	3.1167	2.816	3.4998	7.0971	7.6175	5.6443	81	79	102	216	301	145	1.02879	3.0693e-05	0.00146156	up	CM027382.1	2083551	2086442	+	IFM89_001628	--	K01051 pectinesterase [EC:3.1.1.11] | (RefSeq) pectinesterase-like (A)	ko00040: Pentose and glucuronate interconversions; ko01100: Metabolic pathways	hypothetical protein IFM89_001628 [Coptis chinensis]	PME51_ARATH RecName: Full=Probable pectinesterase/pectinesterase inhibitor 51; Includes: RecName: Full=Pectinesterase inhibitor 51; AltName: Full=Pectin methylesterase inhibitor 51; Includes: RecName: Full=Pectinesterase 51; Short=PE 51; EC=3.1.1.11; AltName: Full=Pectin methylesterase 51; Short=AtPME51; Flags: Precursor;	A0A835HJX8_9MAGN RecName: Full=PMEI domain-containing protein {ECO:0000259|SMART:SM00856};	--	GO:0005576,extracellular region; GO:0045330,aspartyl esterase activity; GO:0030599,pectinesterase activity; GO:0046910,pectinesterase inhibitor activity; GO:0042545,cell wall modification; GO:0045490,pectin catabolic process; GO:0003674,molecular_function; GO:0003824,catalytic activity; GO:0016787,hydrolase activity; GO:0016788,hydrolase activity, acting on ester bonds; GO:0052689,carboxylic este…	PF01095.22:Pectinesterase	--	--	--
IFM89_021631	36.6842	63.9005	42.3707	11.7941	12.3417	28.5155	911	1713	1180	343	466	700	-1.52517	3.16596e-05	0.00148388	down	CM027379.1	441708	443816	+	IFM89_021631	--	--	--	hypothetical protein IFM89_021631 [Coptis chinensis]	--	A0A835IBN7_9MAGN SubName: Full=Uncharacterized protein {ECO:0000313|EMBL:KAF9615060.1};	--	--	--	--	--	--
IFM89_016204	165.638	216.273	163.782	61.7647	114.227	100.143	845	1191	937	369	886	505	-1.06386	3.28783e-05	0.00152872	down	CM027377.1	35761707	35762024	+	IFM89_016204	--	--	--	hypothetical protein IFM89_016204 [Coptis chinensis]	SMR6_ARATH RecName: Full=Cyclin-dependent protein kinase inhibitor SMR6 {ECO:0000303|PubMed:20706207, ECO:0000303|PubMed:24399300, ECO:0000303|PubMed:26546445}; AltName: Full=Protein SIAMESE-RELATED 6 {ECO:0000303|PubMed:20706207, ECO:0000303|PubMed:24399300, ECO:0000303|PubMed:26546445};	A0A835MIH4_9MAGN SubName: Full=Uncharacterized protein {ECO:0000313|EMBL:KAF9624956.1};	--	GO:0005634,nucleus; GO:0004860,protein kinase inhibitor activity; GO:0007049,cell cycle; GO:0045839,negative regulation of mitotic nuclear division; GO:0032875,regulation of DNA endoreduplication; GO:0003674,molecular_function; GO:0004857,enzyme inhibitor activity; GO:0019207,kinase regulator activity; GO:0019210,kinase inhibitor activity; GO:0019887,protein kinase regulator activity; GO:0030234,…	--	--	--	--
novel.6141	8.4979	6.8162	7.3466	3.23	3.1694	4.5605	164	142	159	73	93	87	-1.13818	3.2898e-05	0.00152872	down	CM027383.1	80516600	80520055	-	--	--	K22138 mitochondrial pyruvate carrier 1 | (RefSeq) mitochondrial pyruvate carrier 1 isoform X1 (A)	--	mitochondrial pyruvate carrier 1 isoform X1 [Phoenix dactylifera]	MPC1_ARATH RecName: Full=Mitochondrial pyruvate carrier 1 {ECO:0000305}; Short=AtMPC1 {ECO:0000305};	A0A7N0SXC0_KALFE RecName: Full=Mitochondrial pyruvate carrier {ECO:0000256|RuleBase:RU363100};	Uncharacterized conserved protein	GO:0031305,integral component of mitochondrial inner membrane; GO:0005739,mitochondrion; GO:0000325,plant-type vacuole; GO:0005886,plasma membrane; GO:0009536,plastid; GO:0050833,pyruvate transmembrane transporter activity; GO:0006850,mitochondrial pyruvate transmembrane transport; GO:0010119,regulation of stomatal movement; GO:0003674,molecular_function; GO:0005215,transporter activity; GO:00053…	PF03650.16:Mitochondrial pyruvate carriers	--	--	--
IFM89_004670	175.232	250.339	283.906	79.9175	109.986	156.727	2977	4591	5409	1590	2841	2632	-1.11555	3.29096e-05	0.00152872	down	CM027379.1	30742785	30746073	+	IFM89_004670	--	K01188 beta-glucosidase [EC:3.2.1.21] | (RefSeq) beta-glucosidase 12-like (A)	ko00460: Cyanoamino acid metabolism; ko00500: Starch and sucrose metabolism; ko00999: Biosynthesis of various plant secondary metabolites; ko01100: Metabolic pathways; ko01110: Biosynthesis of secondary metabolites	hypothetical protein IFM89_004670 [Coptis chinensis]	BGL12_ORYSI RecName: Full=Beta-glucosidase 12 {ECO:0000305}; EC=3.2.1.21 {ECO:0000305}; Flags: Precursor;	A0A835M1J1_9MAGN SubName: Full=Uncharacterized protein {ECO:0000313|EMBL:KAF9612967.1};	Beta-glucosidase, lactase phlorizinhydrolase, and related proteins	GO:0005576,extracellular region; GO:0033907,beta-D-fucosidase activity; GO:0004565,beta-galactosidase activity; GO:0008422,beta-glucosidase activity; GO:0102483,scopolin beta-glucosidase activity; GO:0005975,carbohydrate metabolic process; GO:0003674,molecular_function; GO:0003824,catalytic activity; GO:0004553,hydrolase activity, hydrolyzing O-glycosyl compounds; GO:0016787,hydrolase activity; G…	PF00232.21:Glycosyl hydrolase family 1	--	--	--
IFM89_025120	3.7675	6.2399	4.7848	11.5035	13.2905	15.8228	33	59	47	118	177	137	1.37015	3.39779e-05	0.00156856	up	CM027381.1	85351818	85354193	+	IFM89_025120	--	--	--	hypothetical protein IFM89_025120 [Coptis chinensis]	--	A0A835M0P6_9MAGN SubName: Full=Uncharacterized protein {ECO:0000313|EMBL:KAF9606431.1};	--	--	--	--	--	--
novel.6356	2.7601	8.3679	5.5297	1.561	1.8625	0.8703	77	252	173	51	79	24	-2.03395	3.39929e-05	0.00156856	down	CM027384.1	2788250	2789988	.	--	--	--	--	--	--	--	--	--	--	--	--	--
IFM89_002891	16.4039	19.8662	33.2508	9.5888	12.4204	11.1441	615	804	1398	421	708	413	-1.1509	3.43989e-05	0.00158379	down	CM027378.1	109112152	109115778	-	IFM89_002891	--	K18422 helicase MOV-10 [EC:3.6.4.13] | (RefSeq) probable RNA helicase SDE3 (A)	--	hypothetical protein IFM89_002891 [Coptis chinensis]	SDE3_ARATH RecName: Full=Probable RNA helicase SDE3; EC=3.6.4.13; AltName: Full=Silencing defective protein 3;	A0A835MCN7_9MAGN SubName: Full=Uncharacterized protein {ECO:0000313|EMBL:KAF9618896.1};	RNA helicase	GO:0005829,cytosol; GO:0043186,P granule; GO:0005524,ATP binding; GO:0016887,ATP hydrolysis activity; GO:0003723,RNA binding; GO:0003724,RNA helicase activity; GO:0035194,post-transcriptional gene silencing by RNA; GO:0009616,RNAi-mediated antiviral immune response; GO:0000166,nucleotide binding; GO:0003674,molecular_function; GO:0005488,binding; GO:0017076,purine nucleotide binding; GO:0030554,a…	--	--	--	--
IFM89_027023	18.4927	26.9479	33.2581	7.5406	11.6844	13.2426	178	280	359	85	171	126	-1.36116	3.5299e-05	0.00161101	down	CM027379.1	11675947	11676546	+	IFM89_027023	--	K20617 cytochrome P450 family 71 subfamily A | (RefSeq) cytochrome P450 71A1-like (A)	--	hypothetical protein IFM89_027023 [Coptis chinensis]	C71A1_PERAE RecName: Full=Cytochrome P450 71A1; EC=1.14.-.-; AltName: Full=ARP-2; AltName: Full=CYPLXXIA1;	A0A835IG23_9MAGN SubName: Full=Uncharacterized protein {ECO:0000313|EMBL:KAF9615902.1};	Cytochrome P450 CYP2 subfamily	GO:0005789,endoplasmic reticulum membrane; GO:0016021,integral component of membrane; GO:0020037,heme binding; GO:0005506,iron ion binding; GO:0004497,monooxygenase activity; GO:0016705,oxidoreductase activity, acting on paired donors, with incorporation or reduction of molecular oxygen; GO:0009835,fruit ripening; GO:0003674,molecular_function; GO:0005488,binding; GO:0046906,tetrapyrrole binding;…	PF00067.25:Cytochrome P450	--	--	--
IFM89_036810	7.1329	8.7624	11.3842	24.981	19.853	16.1049	138	183	247	566	584	308	1.07344	3.71609e-05	0.00168492	up	CM027383.1	1801682	1803711	+	IFM89_036810	--	K17500 integrin-linked kinase-associated serine/threonine phosphatase 2C [EC:3.1.3.16] | (RefSeq) WAT1-related protein At3g18200 isoform X1 (A)	--	hypothetical protein IFM89_036810, partial [Coptis chinensis]	WTR38_ARATH RecName: Full=WAT1-related protein At5g07050;	A0A835HLZ9_9MAGN RecName: Full=WAT1-related protein {ECO:0000256|RuleBase:RU363077};	--	GO:0016021,integral component of membrane; GO:0005886,plasma membrane; GO:0022857,transmembrane transporter activity; GO:0003674,molecular_function; GO:0005215,transporter activity; GO:0005575,cellular_component; GO:0016020,membrane; GO:0031224,intrinsic component of membrane; GO:0110165,cellular anatomical entity; GO:0071944,cell periphery	PF00892.23:EamA-like transporter family	--	--	--
IFM89_007744	22.0282	22.0706	22.3592	1.2006	3.6991	8.9296	282	305	321	18	72	113	-2.34984	3.92226e-05	0.0017595	down	CM027377.1	3063584	3064381	+	IFM89_007744	--	--	--	hypothetical protein IFM89_007744 [Coptis chinensis]	--	A0A835ITX9_9MAGN RecName: Full=PHD domain-containing protein {ECO:0000259|SMART:SM00249};	--	GO:0046872,metal ion binding; GO:0006281,DNA repair; GO:0003674,molecular_function; GO:0005488,binding; GO:0043167,ion binding; GO:0043169,cation binding; GO:0006139,nucleobase-containing compound metabolic process; GO:0006259,DNA metabolic process; GO:0006725,cellular aromatic compound metabolic process; GO:0006807,nitrogen compound metabolic process; GO:0006950,response to stress; GO:0006974,ce…	PF03107.19:C1 domain	--	--	--
IFM89_024002	5.1946	5.7964	10.4221	24.1946	50.3932	13.4958	88	106	198	480	1298	226	1.95878	4.01645e-05	0.00178998	up	CM027384.1	77988630	77989972	+	IFM89_024002	--	K16292 KDEL-tailed cysteine endopeptidase [EC:3.4.22.-] | (RefSeq) senescence-specific cysteine protease SAG39-like (A)	--	hypothetical protein IFM89_024002 [Coptis chinensis]	SAG39_ORYSJ RecName: Full=Senescence-specific cysteine protease SAG39 {ECO:0000305}; EC=3.4.22.- {ECO:0000305}; AltName: Full=Cysteine proteinase SAG39 {ECO:0000305}; AltName: Full=Protein SENESCENCE-ASSOCIATED GENE 39 {ECO:0000303|PubMed:20439547}; Flags: Precursor;	A0A835H7I7_9MAGN SubName: Full=Uncharacterized protein {ECO:0000313|EMBL:KAF9593509.1};	Cysteine proteinase Cathepsin L	GO:0005615,extracellular space; GO:0005764,lysosome; GO:0010282,senescence-associated vacuole; GO:0004197,cysteine-type endopeptidase activity; GO:0007568,aging; GO:0010150,leaf senescence; GO:0010623,programmed cell death involved in cell development; GO:0051603,proteolysis involved in protein catabolic process; GO:0009737,response to abscisic acid; GO:0009723,response to ethylene; GO:0009739,re…	PF00112.26:Papain family cysteine protease	--	--	--
IFM89_018143	44.6242	32.0093	55.0168	139.47	73.583	92.3359	771	597	1066	2822	1933	1577	1.12746	4.12507e-05	0.00182281	up	CM027381.1	76190419	76192324	-	IFM89_018143	--	K00799 glutathione S-transferase [EC:2.5.1.18] | (RefSeq) glutathione S-transferase F13 (A)	ko00480: Glutathione metabolism; ko01100: Metabolic pathways	hypothetical protein IFM89_018143 [Coptis chinensis]	GSTFD_ARATH RecName: Full=Glutathione S-transferase F13; Short=AtGSTF13; EC=2.5.1.18; AltName: Full=GST class-phi member 13;	A0A835HWM8_9MAGN RecName: Full=Glutathione transferase {ECO:0000256|ARBA:ARBA00012452}; EC=2.5.1.18 {ECO:0000256|ARBA:ARBA00012452};	Glutathione S-transferase	GO:0005737,cytoplasm; GO:0005829,cytosol; GO:0043295,glutathione binding; GO:0004364,glutathione transferase activity; GO:0006749,glutathione metabolic process; GO:0009407,toxin catabolic process; GO:0003674,molecular_function; GO:0005488,binding; GO:0033218,amide binding; GO:0042277,peptide binding; GO:0043167,ion binding; GO:0043168,anion binding; GO:0072341,modified amino acid binding; GO:1900…	PF02798.23:Glutathione S-transferase, N-terminal domain	--	--	--
novel.3907	15.4617	15.831	18.5403	2.8143	8.617	6.5036	380	420	511	81	322	158	-1.55211	4.17788e-05	0.00183836	down	CM027380.1	107472084	107474153	+	--	--	--	--	--	--	--	--	--	--	--	--	--
IFM89_032183	1.6116	1.5996	2.207	6.1436	4.5048	4.7164	28	30	43	125	119	81	1.41534	4.37787e-05	0.00190625	up	CM027377.1	27187312	27189294	-	IFM89_032183	--	K13430 serine/threonine-protein kinase PBS1 [EC:2.7.11.1] | (RefSeq) serine/threonine-protein kinase PBS1-like (A)	ko04626: Plant-pathogen interaction	hypothetical protein IFM89_032183 [Coptis chinensis]	PBL28_ARATH RecName: Full=Probable serine/threonine-protein kinase PBL28 {ECO:0000305}; EC=2.7.11.1 {ECO:0000305}; AltName: Full=PBS1-like protein 28 {ECO:0000303|PubMed:20413097};	A0A835MGJ0_9MAGN RecName: Full=Protein kinase domain-containing protein {ECO:0000259|PROSITE:PS50011};	Serine/threonine protein kinase	GO:0005886,plasma membrane; GO:0005524,ATP binding; GO:0106310,protein serine kinase activity; GO:0004674,protein serine/threonine kinase activity; GO:0000976,transcription cis-regulatory region binding; GO:0006952,defense response; GO:0006468,protein phosphorylation; GO:0000166,nucleotide binding; GO:0003674,molecular_function; GO:0005488,binding; GO:0017076,purine nucleotide binding; GO:0030554…	PF00069.28:Protein kinase domain	--	--	--
IFM89_018163	8.8475	7.0785	14.703	40.1786	27.7066	21.8676	88	76	164	468	419	215	1.46444	4.39357e-05	0.0019091	up	CM027380.1	25269900	25271040	+	IFM89_018163	--	K15397 3-ketoacyl-CoA synthase [EC:2.3.1.199] | (RefSeq) 3-ketoacyl-CoA synthase 17-like (A)	ko00062: Fatty acid elongation; ko01100: Metabolic pathways; ko01110: Biosynthesis of secondary metabolites; ko04626: Plant-pathogen interaction	hypothetical protein IFM89_018163 [Coptis chinensis]	RADL1_ARATH RecName: Full=Protein RADIALIS-like 1; Short=AtRL1; Short=Protein RAD-like 1; AltName: Full=Protein RADIALIS-LIKE SANT/MYB 2; Short=Protein RSM2;	A0A835LW42_9MAGN SubName: Full=Uncharacterized protein {ECO:0000313|EMBL:KAF9609715.1};	Zuotin and related molecular chaperones (DnaJ superfamily), contains DNA-binding domains	GO:0005634,nucleus; GO:0003700,DNA-binding transcription factor activity; GO:0003674,molecular_function; GO:0140110,transcription regulator activity; GO:0005575,cellular_component; GO:0005622,intracellular anatomical structure; GO:0043226,organelle; GO:0043227,membrane-bounded organelle; GO:0043229,intracellular organelle; GO:0043231,intracellular membrane-bounded organelle; GO:0110165,cellular a…	PF00249.34:Myb-like DNA-binding domain	--	--	--
IFM89_001627	7.0775	6.2759	3.4086	11.4083	14.7861	20.3691	187	179	101	353	594	532	1.39228	4.47677e-05	0.0019412	up	CM027382.1	2076364	2080368	+	IFM89_001627	--	K01051 pectinesterase [EC:3.1.1.11] | (RefSeq) pectinesterase-like (A)	ko00040: Pentose and glucuronate interconversions; ko01100: Metabolic pathways	hypothetical protein IFM89_001627 [Coptis chinensis]	PME51_ARATH RecName: Full=Probable pectinesterase/pectinesterase inhibitor 51; Includes: RecName: Full=Pectinesterase inhibitor 51; AltName: Full=Pectin methylesterase inhibitor 51; Includes: RecName: Full=Pectinesterase 51; Short=PE 51; EC=3.1.1.11; AltName: Full=Pectin methylesterase 51; Short=AtPME51; Flags: Precursor;	A0A835LU76_9MAGN RecName: Full=PMEI domain-containing protein {ECO:0000259|SMART:SM00856};	--	GO:0005576,extracellular region; GO:0045330,aspartyl esterase activity; GO:0030599,pectinesterase activity; GO:0046910,pectinesterase inhibitor activity; GO:0042545,cell wall modification; GO:0045490,pectin catabolic process; GO:0003674,molecular_function; GO:0003824,catalytic activity; GO:0016787,hydrolase activity; GO:0016788,hydrolase activity, acting on ester bonds; GO:0052689,carboxylic este…	PF01095.22:Pectinesterase	--	--	--
IFM89_035749	5.0339	3.4231	3.868	10.5176	7.6783	10.2933	94	69	81	230	218	190	1.12369	4.6775e-05	0.00201152	up	CM027384.1	71621171	71624037	+	IFM89_035749	--	K22382 WD repeat-containing protein 26 | (RefSeq) WD repeat-containing protein 26 homolog (A)	--	hypothetical protein IFM89_035749 [Coptis chinensis]	GRF3_ARATH RecName: Full=Growth-regulating factor 3; Short=AtGRF3; AltName: Full=Transcription activator GRF3;	A0A835H806_9MAGN RecName: Full=Growth-regulating factor {ECO:0000256|RuleBase:RU367127};	--	GO:0005634,nucleus; GO:0005524,ATP binding; GO:0000976,transcription cis-regulatory region binding; GO:0008285,negative regulation of cell population proliferation; GO:0061062,regulation of nematode larval development; GO:0006355,regulation of DNA-templated transcription; GO:0009409,response to cold; GO:0009739,response to gibberellin; GO:0009624,response to nematode; GO:0048364,root development;…	PF08879.13:WRC	GRF	TF	GRF
IFM89_012604	51.3347	46.7946	93.9911	266.514	174.718	105.801	938	923	1926	5703	4854	1911	1.4227	4.92251e-05	0.00210387	up	CM027378.1	3116407	3121521	-	IFM89_012604	--	K14975 codeine 3-O-demethylase [EC:1.14.11.32] | (RefSeq) codeine O-demethylase (A)	ko00950: Isoquinoline alkaloid biosynthesis; ko01100: Metabolic pathways; ko01110: Biosynthesis of secondary metabolites	hypothetical protein IFM89_012604 [Coptis chinensis]	NCS1_COPJA RecName: Full=S-norcoclaurine synthase 1; Short=CjNCS1; EC=4.2.1.78;	A0A835IPQ3_9MAGN RecName: Full=Fe2OG dioxygenase domain-containing protein {ECO:0000259|PROSITE:PS51471};	Iron/ascorbate family oxidoreductases	GO:0050474,(S)-norcoclaurine synthase activity; GO:0046872,metal ion binding; GO:0016491,oxidoreductase activity; GO:0009820,alkaloid metabolic process; GO:0003674,molecular_function; GO:0003824,catalytic activity; GO:0016829,lyase activity; GO:0016835,carbon-oxygen lyase activity; GO:0016836,hydro-lyase activity; GO:0005488,binding; GO:0043167,ion binding; GO:0043169,cation binding; GO:0006807,n…	PF14226.9:non-haem dioxygenase in morphine synthesis N-terminal	--	--	--
IFM89_001020	2.0486	4.0666	2.9228	19.442	9.2005	6.9277	35	75	56	389	239	117	1.88642	4.94197e-05	0.00210787	up	CM027385.1	53737866	53739039	+	IFM89_001020	--	K16040 trans-resveratrol di-O-methyltransferase [EC:2.1.1.240] | (RefSeq) trans-resveratrol di-O-methyltransferase (A)	ko00945: Stilbenoid, diarylheptanoid and gingerol biosynthesis; ko01110: Biosynthesis of secondary metabolites	hypothetical protein IFM89_001020 [Coptis chinensis]	POMT3_SINHE RecName: Full=Pluviatolide O-methyltransferase {ECO:0000303|PubMed:26359402}; Short=PhOMT3 {ECO:0000303|PubMed:26359402}; EC=2.1.1.323 {ECO:0000255|PROSITE-ProRule:PRU01020, ECO:0000269|PubMed:26359402};	A0A835GTF8_9MAGN SubName: Full=Uncharacterized protein {ECO:0000313|EMBL:KAF9587296.1};	Hydroxyindole-O-methyltransferase and related SAM-dependent methyltransferases	GO:0008171,O-methyltransferase activity; GO:0046983,protein dimerization activity; GO:0008757,S-adenosylmethionine-dependent methyltransferase activity; GO:0019438,aromatic compound biosynthetic process; GO:0032259,methylation; GO:0009699,phenylpropanoid biosynthetic process; GO:0009611,response to wounding; GO:0003674,molecular_function; GO:0003824,catalytic activity; GO:0008168,methyltransferas…	PF00891.21:O-methyltransferase domain	--	--	--
IFM89_017151	4.6461	3.766	5.5239	17.8529	10.2283	9.9225	72	63	96	324	241	152	1.36016	5.2574e-05	0.00220188	up	CM027381.1	55584454	55586737	+	IFM89_017151	--	K18810 cyclin D1/2/4, plant | (RefSeq) cyclin-D1-1-like (A)	--	hypothetical protein IFM89_017151 [Coptis chinensis]	CCD11_ARATH RecName: Full=Cyclin-D1-1; AltName: Full=Cyclin-delta-1; Short=Cyclin-d1; AltName: Full=G1/S-specific cyclin-D1-1; Short=CycD1;1;	A0A835HWC6_9MAGN RecName: Full=Cyclin N-terminal domain-containing protein {ECO:0000259|PROSITE:PS00292};	G1/S-specific cyclin D	GO:0000307,cyclin-dependent protein kinase holoenzyme complex; GO:0005737,cytoplasm; GO:0005634,nucleus; GO:0016538,cyclin-dependent protein serine/threonine kinase regulator activity; GO:0051301,cell division; GO:0044772,mitotic cell cycle phase transition; GO:0000079,regulation of cyclin-dependent protein serine/threonine kinase activity; GO:0003674,molecular_function; GO:0019207,kinase regulat…	PF00134.26:Cyclin, N-terminal domain	--	--	--
IFM89_025586	1.2986	0.9126	1.5573	4.168	3.5932	3.307	29	22	39	109	122	73	1.46974	5.34119e-05	0.00223249	up	CM027383.1	45875204	45876718	+	IFM89_025586	--	K10775 phenylalanine ammonia-lyase [EC:4.3.1.24] | (RefSeq) phenylalanine ammonia-lyase (A)	ko00360: Phenylalanine metabolism; ko00940: Phenylpropanoid biosynthesis; ko01100: Metabolic pathways; ko01110: Biosynthesis of secondary metabolites	hypothetical protein IFM89_025586 [Coptis chinensis]	PAL1_PRUAV RecName: Full=Phenylalanine ammonia-lyase 1; EC=4.3.1.24 {ECO:0000250|UniProtKB:P24481};	A0A835HFE8_9MAGN SubName: Full=Uncharacterized protein {ECO:0000313|EMBL:KAF9598146.1};	Phenylalanine and histidine ammonia-lyase	GO:0005737,cytoplasm; GO:0045548,phenylalanine ammonia-lyase activity; GO:0009800,cinnamic acid biosynthetic process; GO:0006559,L-phenylalanine catabolic process; GO:0003674,molecular_function; GO:0003824,catalytic activity; GO:0016829,lyase activity; GO:0016840,carbon-nitrogen lyase activity; GO:0016841,ammonia-lyase activity; GO:0006082,organic acid metabolic process; GO:0006725,cellular aroma…	PF00221.22:Aromatic amino acid lyase	--	--	--
IFM89_033152	26.3094	43.7182	25.4294	14.4384	18.2167	15.8927	417	748	452	268	439	249	-1.05834	5.66947e-05	0.00233231	down	CM027379.1	94361039	94362117	-	IFM89_033152	--	--	--	hypothetical protein IFM89_033152 [Coptis chinensis]	OXS3_ARATH RecName: Full=Protein OXIDATIVE STRESS 3 {ECO:0000303|PubMed:18980652}; Short=AtOXS3 {ECO:0000303|PubMed:18980652};	A0A835M5D9_9MAGN SubName: Full=Uncharacterized protein {ECO:0000313|EMBL:KAF9617047.1};	Nuclear localization sequence binding protein	GO:0016607,nuclear speck; GO:0005634,nucleus; GO:2000028,regulation of photoperiodism, flowering; GO:2000070,regulation of response to water deprivation; GO:0046686,response to cadmium ion; GO:0046688,response to copper ion; GO:0010218,response to far red light; GO:0009416,response to light stimulus; GO:0006979,response to oxidative stress; GO:0010114,response to red light; GO:0009611,response to…	--	--	--	--
novel.8583	20.1566	11.6494	19.3151	29.183	41.1958	48.269	335	209	360	568	1041	793	1.13324	5.74013e-05	0.00235541	up	JADFTS010000043.1	153232	154778	-	--	--	K08917 light-harvesting complex II chlorophyll a/b binding protein 6 | (RefSeq) chlorophyll a-b binding protein CP24, chloroplastic-like (A)	ko00196: Photosynthesis - antenna proteins; ko01100: Metabolic pathways	hypothetical protein [Papaver nudicaule]	CB4A_SOLLC RecName: Full=Chlorophyll a-b binding protein CP24 10A, chloroplastic; Short=CAB-10A; Short=LHCP; Flags: Precursor;	A0A835CYW8_9MAGN RecName: Full=Chlorophyll a-b binding protein, chloroplastic {ECO:0000256|RuleBase:RU363080};	--	GO:0009535,chloroplast thylakoid membrane; GO:0016021,integral component of membrane; GO:0009523,photosystem II; GO:0016168,chlorophyll binding; GO:0009768,photosynthesis, light harvesting in photosystem I; GO:0009416,response to light stimulus; GO:0003674,molecular_function; GO:0005488,binding; GO:0046906,tetrapyrrole binding; GO:0097159,organic cyclic compound binding; GO:1901363,heterocyclic c…	PF00504.24:Chlorophyll A-B binding protein	--	--	--
IFM89_015265	4.9085	7.0139	7.6668	18.9298	15.2344	10.7426	153	236	268	691	722	331	1.11082	5.93371e-05	0.00238888	up	CM027383.1	28846968	28851529	-	IFM89_015265	--	K13680 beta-mannan synthase [EC:2.4.1.32] | (RefSeq) glucomannan 4-beta-mannosyltransferase 9 (A)	--	hypothetical protein IFM89_015265 [Coptis chinensis]	CSLA9_ARATH RecName: Full=Glucomannan 4-beta-mannosyltransferase 9 {ECO:0000305}; EC=2.4.1.32 {ECO:0000269|PubMed:15647349, ECO:0000269|PubMed:17307900}; AltName: Full=Cellulose synthase-like protein A9 {ECO:0000303|PubMed:14612582}; Short=AtCslA9 {ECO:0000303|PubMed:14612582}; AltName: Full=Glucomannan synthase {ECO:0000305}; AltName: Full=Mannan synthase 9 {ECO:0000305}; AltName: Full=Protein R…	A0A835HD06_9MAGN RecName: Full=Glyco_trans_2-like domain-containing protein {ECO:0000259|Pfam:PF13632};	--	GO:0005794,Golgi apparatus; GO:0000139,Golgi membrane; GO:0016021,integral component of membrane; GO:0047259,glucomannan 4-beta-mannosyltransferase activity; GO:0016757,glycosyltransferase activity; GO:0051753,mannan synthase activity; GO:0071555,cell wall organization; GO:0009294,DNA-mediated transformation; GO:0009617,response to bacterium; GO:0000030,mannosyltransferase activity; GO:0003674,mo…	PF13632.9:Glycosyl transferase family group 2	--	--	--
IFM89_029442	5.2422	5.386	3.1022	1.5464	1.8493	1.8802	110	122	73	38	59	39	-1.46205	6.17702e-05	0.00244259	down	CM027384.1	16814599	16817476	+	IFM89_029442	--	K05605 3-hydroxyisobutyryl-CoA hydrolase [EC:3.1.2.4] | (RefSeq) 3-hydroxyisobutyryl-CoA hydrolase-like protein 1, mitochondrial (A)	ko00280: Valine, leucine and isoleucine degradation; ko00410: beta-Alanine metabolism; ko00640: Propanoate metabolism; ko01100: Metabolic pathways; ko01200: Carbon metabolism	hypothetical protein IFM89_029442 [Coptis chinensis]	--	A0A835H6T1_9MAGN SubName: Full=Uncharacterized protein {ECO:0000313|EMBL:KAF9594301.1};	--	--	PF16113.8:Enoyl-CoA hydratase/isomerase	--	--	--
IFM89_009415	3.7584	4.4666	4.983	18.8758	7.2043	10.8811	152	195	226	894	443	435	1.39545	6.2069e-05	0.00244259	up	CM027385.1	17331113	17335121	+	IFM89_009415	--	K06617 raffinose synthase [EC:2.4.1.82] | (RefSeq) probable galactinol--sucrose galactosyltransferase 1 (A)	ko00052: Galactose metabolism; ko01100: Metabolic pathways	hypothetical protein IFM89_009415 [Coptis chinensis]	RFS1_ARATH RecName: Full=Probable galactinol--sucrose galactosyltransferase 1; EC=2.4.1.82; AltName: Full=Protein SEED IMBIBITION 1; AltName: Full=Raffinose synthase 1;	A0A835LBL0_9MAGN RecName: Full=Galactinol--sucrose galactosyltransferase {ECO:0000256|ARBA:ARBA00012708}; EC=2.4.1.82 {ECO:0000256|ARBA:ARBA00012708};	--	GO:0047274,galactinol-sucrose galactosyltransferase activity; GO:0005975,carbohydrate metabolic process; GO:0003674,molecular_function; GO:0003824,catalytic activity; GO:0008378,galactosyltransferase activity; GO:0016740,transferase activity; GO:0016757,glycosyltransferase activity; GO:0016758,hexosyltransferase activity; GO:0008150,biological_process; GO:0008152,metabolic process; GO:0044238,pri…	PF05691.15:Raffinose synthase or seed imbibition protein Sip1	--	--	--
novel.6013	51.096	58.1311	114.046	185.898	198.008	153.281	491	603	1229	2092	2893	1456	1.18255	6.35862e-05	0.00247891	up	CM027383.1	67846610	67847208	.	--	--	--	--	hypothetical protein AQUCO_00900508v1 [Aquilegia coerulea]	AGP13_ARATH RecName: Full=Arabinogalactan protein 13 {ECO:0000303|PubMed:11006345}; Short=AtAGP13 {ECO:0000303|PubMed:11006345}; AltName: Full=Arabinogalactan peptide 13 {ECO:0000303|PubMed:11006345}; Short=AG-peptide 13 {ECO:0000303|PubMed:11006345}; Flags: Precursor;	A0A2G5EDZ3_AQUCA SubName: Full=Uncharacterized protein {ECO:0000313|EMBL:PIA53978.1};	--	GO:0031225,anchored component of membrane; GO:0005886,plasma membrane; GO:0005575,cellular_component; GO:0016020,membrane; GO:0031224,intrinsic component of membrane; GO:0110165,cellular anatomical entity; GO:0071944,cell periphery	--	--	--	--
IFM89_025576	3.7997	5.0795	5.1467	1.9714	1.5501	2.4329	79	114	120	48	49	50	-1.33213	6.90258e-05	0.00265133	down	CM027378.1	105973229	105974524	+	IFM89_025576	--	--	--	hypothetical protein IFM89_025576 [Coptis chinensis]	FB57_ARATH RecName: Full=Putative F-box protein At1g53550;	A0A835IMF7_9MAGN RecName: Full=F-box domain-containing protein {ECO:0000259|SMART:SM00256};	--	--	PF12937.10:F-box-like	--	--	--
IFM89_011656	2.9365	6.1292	7.8554	11.966	22.7848	17.4854	79	178	237	377	932	465	1.54361	6.91719e-05	0.00265206	up	CM027381.1	86895659	86898016	+	IFM89_011656	--	K21926 (+)-alpha-terpineol/(4S)-limonene synthase [EC:4.2.3.112 4.2.3.16] | (RefSeq) monoterpene synthase-like isoform X1 (A)	ko00902: Monoterpenoid biosynthesis; ko01100: Metabolic pathways; ko01110: Biosynthesis of secondary metabolites	hypothetical protein IFM89_011656 [Coptis chinensis]	ATESY_MAGGA RecName: Full=Alpha-terpineol synthase, chloroplastic; Short=Mg17; EC=4.2.3.111; EC=4.2.3.112; Flags: Precursor;	A0A835HX85_9MAGN SubName: Full=Uncharacterized protein {ECO:0000313|EMBL:KAF9604963.1};	--	GO:0009570,chloroplast stroma; GO:0000287,magnesium ion binding; GO:0010333,terpene synthase activity; GO:0016102,diterpenoid biosynthetic process; GO:0033383,geranyl diphosphate metabolic process; GO:0043693,monoterpene biosynthetic process; GO:0003674,molecular_function; GO:0005488,binding; GO:0043167,ion binding; GO:0043169,cation binding; GO:0046872,metal ion binding; GO:0003824,catalytic act…	PF03936.19:Terpene synthase family, metal binding domain	--	--	--
IFM89_033035	41.0009	39.1307	82.5	204.479	116.301	109.339	959	988	2164	5601	4136	2528	1.31631	6.96765e-05	0.00266162	up	CM027379.1	1441523	1444313	-	IFM89_033035	--	K13384 (RS)-1-benzyl-1,2,3,4-tetrahydroisoquinoline N-methyltransferase [EC:2.1.1.115 2.1.1.140] | (RefSeq) (S)-coclaurine N-methyltransferase (A)	ko00950: Isoquinoline alkaloid biosynthesis; ko01100: Metabolic pathways; ko01110: Biosynthesis of secondary metabolites	hypothetical protein IFM89_033035 [Coptis chinensis]	CNMT_THLFG RecName: Full=(S)-coclaurine N-methyltransferase; Short=TfCNMT; EC=2.1.1.140;	A0A835IFF8_9MAGN SubName: Full=Uncharacterized protein {ECO:0000313|EMBL:KAF9616965.1};	--	GO:0005737,cytoplasm; GO:0030794,(S)-coclaurine-N-methyltransferase activity; GO:0032259,methylation; GO:0003674,molecular_function; GO:0003824,catalytic activity; GO:0008168,methyltransferase activity; GO:0008757,S-adenosylmethionine-dependent methyltransferase activity; GO:0016740,transferase activity; GO:0016741,transferase activity, transferring one-carbon groups; GO:0008150,biological_proces…	PF02353.23:Mycolic acid cyclopropane synthetase	--	--	--
IFM89_002379	1.6674	1.8615	2.783	5.6952	4.7803	5.4064	39	47	73	156	170	125	1.24221	7.36595e-05	0.00278823	up	CM027378.1	85290516	85293123	-	IFM89_002379	--	K20495 long-chain fatty acid omega-monooxygenase [EC:1.14.14.80] | (RefSeq) cytochrome P450 704B1-like (A)	ko00071: Fatty acid degradation; ko00073: Cutin, suberine and wax biosynthesis; ko01100: Metabolic pathways	hypothetical protein IFM89_002379 [Coptis chinensis]	C04C1_PINTA RecName: Full=Cytochrome P450 704C1; EC=1.14.-.-; AltName: Full=Cytochrome P450 CYPD;	A0A835M9F1_9MAGN SubName: Full=Uncharacterized protein {ECO:0000313|EMBL:KAF9618684.1};	Cytochrome P450 CYP4/CYP19/CYP26 subfamilies	GO:0016021,integral component of membrane; GO:0020037,heme binding; GO:0005506,iron ion binding; GO:0004497,monooxygenase activity; GO:0016705,oxidoreductase activity, acting on paired donors, with incorporation or reduction of molecular oxygen; GO:0003674,molecular_function; GO:0005488,binding; GO:0046906,tetrapyrrole binding; GO:0097159,organic cyclic compound binding; GO:1901363,heterocyclic c…	PF00067.25:Cytochrome P450	--	--	--
IFM89_022579	1.0104	0.6	1.2244	3.4291	2.3174	2.7782	39	25	53	155	136	106	1.5014	7.92093e-05	0.00296601	up	CM027377.1	40608823	40614782	-	IFM89_022579	--	K15333 tRNA guanosine-2'-O-methyltransferase [EC:2.1.1.34] | (RefSeq) uncharacterized protein LOC104224633 (A)	--	hypothetical protein IFM89_022579 [Coptis chinensis]	SBT25_ARATH RecName: Full=Subtilisin-like protease SBT2.5 {ECO:0000303|PubMed:16193095}; EC=3.4.21.- {ECO:0000305}; AltName: Full=Subtilase subfamily 2 member 5 {ECO:0000303|PubMed:16193095}; Short=AtSBT2.5 {ECO:0000303|PubMed:16193095}; AltName: Full=Subtilisin-like serine protease 3 {ECO:0000303|PubMed:12702015}; Short=At-SLP3 {ECO:0000303|PubMed:12702015}; Flags: Precursor;	A0A835MIX7_9MAGN SubName: Full=Uncharacterized protein {ECO:0000313|EMBL:KAF9625421.1};	--	GO:0004252,serine-type endopeptidase activity; GO:0008236,serine-type peptidase activity; GO:0006508,proteolysis; GO:0003674,molecular_function; GO:0003824,catalytic activity; GO:0004175,endopeptidase activity; GO:0008233,peptidase activity; GO:0016787,hydrolase activity; GO:0017171,serine hydrolase activity; GO:0140096,catalytic activity, acting on a protein; GO:0006807,nitrogen compound metabol…	PF00082.25:Subtilase family	--	--	--
IFM89_034253	4.2261	3.7518	5.3386	12.2545	8.6281	15.8541	48	46	68	163	149	178	1.37465	7.97685e-05	0.00297627	up	CM027384.1	23374576	23375441	+	IFM89_034253	--	K13993 HSP20 family protein | (RefSeq) small heat shock protein, chloroplastic (A)	ko04141: Protein processing in endoplasmic reticulum	hypothetical protein IFM89_034253 [Coptis chinensis]	HS21C_PEA RecName: Full=Small heat shock protein, chloroplastic; Flags: Precursor;	A0A835H7D5_9MAGN RecName: Full=SHSP domain-containing protein {ECO:0000259|PROSITE:PS01031};	Molecular chaperone (small heat-shock protein Hsp26/Hsp42)	GO:0009507,chloroplast; GO:0009408,response to heat; GO:0006950,response to stress; GO:0008150,biological_process; GO:0009266,response to temperature stimulus; GO:0009628,response to abiotic stimulus; GO:0050896,response to stimulus; GO:0005575,cellular_component; GO:0005622,intracellular anatomical structure; GO:0005737,cytoplasm; GO:0009536,plastid; GO:0043226,organelle; GO:0043227,membrane-bou…	PF00011.24:Hsp20/alpha crystallin family	--	--	--
IFM89_027941	288.555	191.105	363.35	54.537	89.1368	169.28	2259	1615	3190	500	1061	1310	-1.51015	8.02065e-05	0.00298726	down	CM027379.1	2369857	2371475	-	IFM89_027941	--	--	--	hypothetical protein IFM89_027941 [Coptis chinensis]	--	A0A835IGH9_9MAGN SubName: Full=Uncharacterized protein {ECO:0000313|EMBL:KAF9616002.1};	--	--	--	--	--	--
novel.3587	1.0906	1.9982	2.723	8.5678	3.8894	6.9631	45	89	126	414	244	284	1.6505	8.18411e-05	0.0030373	up	CM027380.1	77299892	77302463	+	--	--	--	--	--	--	--	--	--	--	--	--	--
IFM89_027024	1.9672	2.5437	2.3754	0.8749	0.8895	0.8292	48	67	65	25	33	20	-1.49155	8.30645e-05	0.00307177	down	CM027379.1	11678326	11680738	-	IFM89_027024	--	--	--	hypothetical protein IFM89_027024 [Coptis chinensis]	--	A0A835IG11_9MAGN SubName: Full=Uncharacterized protein {ECO:0000313|EMBL:KAF9615903.1};	--	--	--	--	--	--
IFM89_011821	3.0145	2.4268	2.912	5.7917	5.2634	8.2773	84	73	91	189	223	228	1.12403	8.35199e-05	0.00307769	up	CM027384.1	80032168	80034502	-	IFM89_011821	--	--	--	hypothetical protein IFM89_011821 [Coptis chinensis]	SINE1_ARATH RecName: Full=Protein SINE1 {ECO:0000303|PubMed:24891605};	A0A835H3R5_9MAGN SubName: Full=Uncharacterized protein {ECO:0000313|EMBL:KAF9592071.1};	--	GO:0016021,integral component of membrane; GO:0005635,nuclear envelope; GO:0031965,nuclear membrane; GO:0005634,nucleus; GO:0032797,SMN complex; GO:0003779,actin binding; GO:0007097,nuclear migration; GO:0000387,spliceosomal snRNP assembly; GO:0003674,molecular_function; GO:0005488,binding; GO:0005515,protein binding; GO:0008092,cytoskeletal protein binding; GO:0006810,transport; GO:0008150,biolo…	PF11865.11:Domain of unknown function (DUF3385)	--	--	--
IFM89_007941	1.8566	2.0968	1.6782	3.3444	4.3156	4.4253	73	89	74	154	258	172	1.01902	8.52875e-05	0.00312626	up	CM027378.1	111948605	111957650	+	IFM89_007941	--	--	--	hypothetical protein IFM89_007941 [Coptis chinensis]	FBL39_ARATH RecName: Full=F-box/LRR-repeat protein At2g42730;	A0A835IKP5_9MAGN RecName: Full=F-box domain-containing protein {ECO:0000259|PROSITE:PS50181};	--	--	PF08387.13:FBD	--	--	--
IFM89_033387	1.1356	1.5404	1.9529	4.0518	3.6277	5.4567	28	41	54	117	136	133	1.41401	8.84503e-05	0.00321395	up	CM027383.1	34098920	34100769	+	IFM89_033387	--	K24028 salicylic acid 3-hydroxylase [EC:1.14.11.-] | (RefSeq) protein DMR6-LIKE OXYGENASE 1-like (A)	--	hypothetical protein IFM89_033387 [Coptis chinensis]	SLC1_ORYSJ RecName: Full=Probable 2-oxoglutarate-dependent dioxygenase SLC1 {ECO:0000305}; EC=1.14.11.- {ECO:0000255|PROSITE-ProRule:PRU00805}; AltName: Full=2-oxoglutarate-dependent dioxygenase 4 {ECO:0000303|PubMed:25728912}; AltName: Full=Gibberellin 20 oxidase 7 {ECO:0000303|PubMed:26706069}; Short=OsGA20ox7 {ECO:0000303|PubMed:26706069}; AltName: Full=Protein SLENDER AND CRINKLY LEAF 1 {ECO:…	A0A835HIQ3_9MAGN RecName: Full=Fe2OG dioxygenase domain-containing protein {ECO:0000259|PROSITE:PS51471};	Iron/ascorbate family oxidoreductases	GO:0005737,cytoplasm; GO:0005634,nucleus; GO:0051213,dioxygenase activity; GO:0046872,metal ion binding; GO:0003674,molecular_function; GO:0003824,catalytic activity; GO:0016491,oxidoreductase activity; GO:0005488,binding; GO:0043167,ion binding; GO:0043169,cation binding; GO:0005575,cellular_component; GO:0005622,intracellular anatomical structure; GO:0110165,cellular anatomical entity; GO:00432…	PF03171.23:2OG-Fe(II) oxygenase superfamily	--	--	--
novel.5218	4.6372	45.1059	16.3016	2.1322	5.5133	1.9847	52	546	205	28	94	22	-2.85471	8.95949e-05	0.00323862	down	CM027382.1	82132320	82146414	-	--	--	--	--	hypothetical protein F0562_026584 [Nyssa sinensis]	FIL1_ANTMA RecName: Full=Stamen-specific protein FIL1; Flags: Precursor;	A0A5J5BDC4_9ASTE RecName: Full=AAI domain-containing protein {ECO:0000259|SMART:SM00499};	--	GO:0005576,extracellular region; GO:0005575,cellular_component; GO:0110165,cellular anatomical entity	PF14368.9:Probable lipid transfer	--	--	--
IFM89_028666	6.0815	7.136	5.0614	1.8175	2.6665	1.5381	60	76	56	21	40	15	-1.66788	9.18118e-05	0.00330667	down	CM027385.1	79216431	79217531	+	IFM89_028666	--	K15382 solute carrier family 50 (sugar transporter) | (RefSeq) bidirectional sugar transporter SWEET2 (A)	--	hypothetical protein IFM89_028666 [Coptis chinensis]	SWT2A_ORYSI RecName: Full=Bidirectional sugar transporter SWEET2a; Short=OsSWEET2a; Flags: Precursor;	A0A835H0Z3_9MAGN SubName: Full=Uncharacterized protein {ECO:0000313|EMBL:KAF9589757.1};	Multitransmembrane protein	GO:0005887,integral component of plasma membrane; GO:0051119,sugar transmembrane transporter activity; GO:0003674,molecular_function; GO:0005215,transporter activity; GO:0015144,carbohydrate transmembrane transporter activity; GO:0022857,transmembrane transporter activity; GO:0005575,cellular_component; GO:0005886,plasma membrane; GO:0016020,membrane; GO:0016021,integral component of membrane; GO…	PF03083.19:Sugar efflux transporter for intercellular exchange	--	--	--
IFM89_000726	2.5513	5.2629	3.9402	13.5428	8.4072	8.4612	97	216	168	603	486	318	1.28319	9.21117e-05	0.00330667	up	CM027377.1	23099633	23103761	-	IFM89_000726	--	--	--	hypothetical protein IFM89_000726 [Coptis chinensis]	TORL3_ARATH RecName: Full=TORTIFOLIA1-like protein 3 {ECO:0000303|PubMed:15324671};	A0A835IVW7_9MAGN SubName: Full=Uncharacterized protein {ECO:0000313|EMBL:KAF9623237.1};	--	GO:0005874,microtubule; GO:0008017,microtubule binding; GO:0003674,molecular_function; GO:0005488,binding; GO:0005515,protein binding; GO:0008092,cytoskeletal protein binding; GO:0015631,tubulin binding; GO:0005575,cellular_component; GO:0005622,intracellular anatomical structure; GO:0005856,cytoskeleton; GO:0015630,microtubule cytoskeleton; GO:0043226,organelle; GO:0043228,non-membrane-bounded o…	PF02985.25:HEAT repeat	--	--	--
IFM89_023463	0.7153	0.994	0.8657	2.2687	1.9155	2.6878	28	42	38	104	114	104	1.32578	9.40504e-05	0.00336468	up	CM027383.1	89400940	89405424	+	IFM89_023463	--	K03549 KUP system potassium uptake protein | (RefSeq) potassium transporter 1-like isoform X1 (A)	--	hypothetical protein IFM89_023463 [Coptis chinensis]	POT1_ARATH RecName: Full=Potassium transporter 1; Short=AtKT1; Short=AtKUP1; Short=AtPOT1;	A0A835HH01_9MAGN SubName: Full=Uncharacterized protein {ECO:0000313|EMBL:KAF9597978.1};	--	GO:0016021,integral component of membrane; GO:0016020,membrane; GO:0005886,plasma membrane; GO:0015079,potassium ion transmembrane transporter activity; GO:0006813,potassium ion transport; GO:0003674,molecular_function; GO:0005215,transporter activity; GO:0008324,cation transmembrane transporter activity; GO:0015075,ion transmembrane transporter activity; GO:0015318,inorganic molecular entity tra…	PF02705.19:K+ potassium transporter	--	--	--
IFM89_002338	14.1136	12.8323	16.9356	57.6916	29.5953	24.0607	324	318	436	1551	1033	546	1.25556	9.44524e-05	0.00336474	up	CM027378.1	84596612	84598743	+	IFM89_002338	--	K18881 D-lactate dehydratase [EC:4.2.1.130] | (RefSeq) DJ-1 protein homolog E-like (A)	ko00620: Pyruvate metabolism; ko01100: Metabolic pathways	hypothetical protein IFM89_002338 [Coptis chinensis]	DJ1E_ARATH RecName: Full=DJ-1 protein homolog E; Short=AtDJ-1E; AltName: Full=Protein YELLOW-LEAF-SPECIFIC GENE 5;	A0A835IN57_9MAGN SubName: Full=Uncharacterized protein {ECO:0000313|EMBL:KAF9618643.1};	Putative transcriptional regulator DJ-1	GO:0005794,Golgi apparatus; GO:0005575,cellular_component; GO:0005622,intracellular anatomical structure; GO:0005737,cytoplasm; GO:0012505,endomembrane system; GO:0043226,organelle; GO:0043227,membrane-bounded organelle; GO:0043229,intracellular organelle; GO:0043231,intracellular membrane-bounded organelle; GO:0110165,cellular anatomical entity	PF01965.27:DJ-1/PfpI family	--	--	--
IFM89_006579	14.815	20.8022	12.7953	3.4212	7.17	7.4466	159	241	154	43	117	79	-1.50573	9.61392e-05	0.00340437	down	CM027378.1	14649358	14650115	+	IFM89_006579	--	--	--	hypothetical protein IFM89_006579 [Coptis chinensis]	O3L3_ARATH RecName: Full=Protein OXIDATIVE STRESS 3 LIKE 3 {ECO:0000303|PubMed:18980652}; Short=AtO3L3 {ECO:0000303|PubMed:18980652};	A0A835IMS8_9MAGN SubName: Full=Uncharacterized protein {ECO:0000313|EMBL:KAF9619392.1};	Nuclear localization sequence binding protein	GO:0005634,nucleus; GO:0006979,response to oxidative stress; GO:0006950,response to stress; GO:0008150,biological_process; GO:0050896,response to stimulus; GO:0005575,cellular_component; GO:0005622,intracellular anatomical structure; GO:0043226,organelle; GO:0043227,membrane-bounded organelle; GO:0043229,intracellular organelle; GO:0043231,intracellular membrane-bounded organelle; GO:0110165,cell…	--	--	--	--
IFM89_029134	2.8496	3.2997	2.7881	9.0572	5.6226	6.0458	72	90	79	268	216	151	1.12629	9.93531e-05	0.00349445	up	CM027378.1	110487229	110491813	+	IFM89_029134	--	K01110 phosphatidylinositol-3,4,5-trisphosphate 3-phosphatase and dual-specificity protein phosphatase PTEN [EC:3.1.3.16 3.1.3.48 3.1.3.67] | (RefSeq) phosphatidylinositol 3,4,5-trisphosphate 3-phosphatase and protein-tyrosine-phosphatase PTEN2A-like (A)	ko00562: Inositol phosphate metabolism; ko01100: Metabolic pathways; ko04070: Phosphatidylinositol signaling system	hypothetical protein IFM89_029134 [Coptis chinensis]	PTN2A_ARATH RecName: Full=Phosphatidylinositol 3,4,5-trisphosphate 3-phosphatase and protein-tyrosine-phosphatase PTEN2A {ECO:0000305}; EC=3.1.3.48 {ECO:0000255|PROSITE-ProRule:PRU10044, ECO:0000269|PubMed:21864294}; EC=3.1.3.67 {ECO:0000269|PubMed:21864294}; AltName: Full=Protein PHOSPHATASE AND TENSIN HOMOLOG 2-a {ECO:0000303|PubMed:21864294}; Short=AtPTEN2 {ECO:0000303|PubMed:12368500}; Short=…	A0A835IR78_9MAGN SubName: Full=Uncharacterized protein {ECO:0000313|EMBL:KAF9621914.1};	Clathrin coat dissociation kinase GAK/PTEN/Auxilin and related tyrosine phosphatases	GO:0005829,cytosol; GO:0070300,phosphatidic acid binding; GO:0052866,phosphatidylinositol phosphate phosphatase activity; GO:0016314,phosphatidylinositol-3,4,5-trisphosphate 3-phosphatase activity; GO:0004725,protein tyrosine phosphatase activity; GO:0016311,dephosphorylation; GO:0035335,peptidyl-tyrosine dephosphorylation; GO:0046856,phosphatidylinositol dephosphorylation; GO:0006970,response to…	PF00102.30:Protein-tyrosine phosphatase	--	--	--
IFM89_001631	26.7616	48.0205	35.9408	13.1909	17.1719	23.3311	492	953	741	284	480	424	-1.12834	0.000103326	0.00362198	down	CM027382.1	2158184	2159515	-	IFM89_001631	--	--	--	hypothetical protein IFM89_001631 [Coptis chinensis]	--	A0A835HI37_9MAGN SubName: Full=Uncharacterized protein {ECO:0000313|EMBL:KAF9599685.1};	--	--	PF04720.15:PDDEXK-like family of unknown function	--	--	--
IFM89_019520	1.345	0.9882	1.5716	3.3268	5.0027	3.4251	29	23	38	84	164	73	1.51113	0.000104555	0.00365278	up	CM027380.1	89253763	89258275	-	IFM89_019520	--	K20240 spermidine dicoumaroyl transferase [EC:2.3.1.249] | (RefSeq) spermidine coumaroyl-CoA acyltransferase-like (A)	--	hypothetical protein IFM89_019520 [Coptis chinensis]	DBNBT_TAXCA RecName: Full=3'-N-debenzoyl-2'-deoxytaxol N-benzoyltransferase {ECO:0000303|PubMed:12089320}; Short=DBTNBT {ECO:0000303|PubMed:12089320}; EC=2.3.1.- {ECO:0000269|PubMed:12089320};	A0A835I3Q0_9MAGN SubName: Full=Uncharacterized protein {ECO:0000313|EMBL:KAF9609964.1};	--	GO:0016746,acyltransferase activity; GO:0042617,paclitaxel biosynthetic process; GO:0003674,molecular_function; GO:0003824,catalytic activity; GO:0016740,transferase activity; GO:0006629,lipid metabolic process; GO:0006720,isoprenoid metabolic process; GO:0006721,terpenoid metabolic process; GO:0008150,biological_process; GO:0008152,metabolic process; GO:0008299,isoprenoid biosynthetic process; G…	PF02458.18:Transferase family	--	--	--
IFM89_035969	1.0277	1.4875	1.6896	3.4005	3.4429	3.4438	32	50	59	124	163	106	1.20296	0.000106415	0.00370535	up	CM027384.1	46362572	46364703	+	IFM89_035969	--	K05681 ATP-binding cassette, subfamily G (WHITE), member 2 | (RefSeq) ABC transporter G family member 5-like (A)	ko02010: ABC transporters	hypothetical protein IFM89_035969 [Coptis chinensis]	AB6G_ARATH RecName: Full=ABC transporter G family member 6; Short=ABC transporter ABCG.6; Short=AtABCG6; AltName: Full=White-brown complex homolog protein 6; Short=AtWBC6;	A0A835H7E1_9MAGN RecName: Full=ABC transporter domain-containing protein {ECO:0000259|PROSITE:PS50893};	Transporter, ABC superfamily (Breast cancer resistance protein)	GO:0016021,integral component of membrane; GO:0016020,membrane; GO:0140359,ABC-type transporter activity; GO:0005524,ATP binding; GO:0042626,ATPase-coupled transmembrane transporter activity; GO:1903825,organic acid transmembrane transport; GO:0009624,response to nematode; GO:0010345,suberin biosynthetic process; GO:0055085,transmembrane transport; GO:0003674,molecular_function; GO:0005215,transp…	PF00005.30:ABC transporter	--	--	--
IFM89_038038	20.1979	24.9612	17.3508	9.0324	12.8548	5.1963	464	619	447	243	449	118	-1.28642	0.000110186	0.00379486	down	CM027385.1	5515212	5519540	+	IFM89_038038	--	K00703 starch synthase [EC:2.4.1.21] | (RefSeq) probable starch synthase 4, chloroplastic/amyloplastic (A)	ko00500: Starch and sucrose metabolism; ko01100: Metabolic pathways; ko01110: Biosynthesis of secondary metabolites	hypothetical protein IFM89_038038 [Coptis chinensis]	SSY4_ARATH RecName: Full=Probable starch synthase 4, chloroplastic/amyloplastic {ECO:0000305}; Short=AtSS4 {ECO:0000303|PubMed:17217470}; EC=2.4.1.21 {ECO:0000269|PubMed:19666739}; AltName: Full=Soluble starch synthase IV {ECO:0000303|PubMed:17217470}; Short=SSIV {ECO:0000303|PubMed:17217470}; Flags: Precursor;	A0A835LFN4_9MAGN RecName: Full=Glyco_transf_5 domain-containing protein {ECO:0000259|Pfam:PF08323};	--	GO:0009501,amyloplast; GO:0009507,chloroplast; GO:0033201,alpha-1,4-glucan synthase activity; GO:0004373,glycogen (starch) synthase activity; GO:0009011,starch synthase activity; GO:0019252,starch biosynthetic process; GO:0005982,starch metabolic process; GO:0003674,molecular_function; GO:0003824,catalytic activity; GO:0016740,transferase activity; GO:0016757,glycosyltransferase activity; GO:0016…	PF08323.14:Starch synthase catalytic domain	--	--	--
novel.8897	2.1629	1.8834	2.353	4.3957	4.6375	5.2514	50	47	61	119	163	120	1.07294	0.000111766	0.00382256	up	JADFTS010000089.1	41812	45265	+	--	--	--	--	hypothetical protein IFM89_020994 [Coptis chinensis]	--	A0A835H7Y4_9MAGN SubName: Full=Uncharacterized protein {ECO:0000313|EMBL:KAF9593238.1};	--	--	PF14226.9:non-haem dioxygenase in morphine synthesis N-terminal	--	--	--
IFM89_012748	4.5863	4.3548	6.3048	28.2948	24.6088	6.1088	120	123	185	867	979	158	1.86637	0.000121142	0.00406214	up	CM027383.1	70665763	70667705	+	IFM89_012748	--	K09873 aquaporin TIP | (RefSeq) aquaporin TIP1-1-like (A)	--	hypothetical protein IFM89_012748 [Coptis chinensis]	TIP12_MUSAC RecName: Full=Aquaporin TIP1-2 {ECO:0000303|PubMed:26307965, ECO:0000303|PubMed:29778840}; AltName: Full=Tonoplast intrinsic protein 1-2 {ECO:0000303|PubMed:26307965, ECO:0000303|PubMed:29778840}; Short=MaTIP1-2 {ECO:0000303|PubMed:26307965}; Short=MaTIP1;2 {ECO:0000303|PubMed:26307965, ECO:0000303|PubMed:29778840};	A0A835HCL7_9MAGN SubName: Full=Uncharacterized protein {ECO:0000313|EMBL:KAF9596625.1};	Aquaporin (major intrinsic protein family)	--	PF00230.23:Major intrinsic protein	--	--	--
novel.4612	5.7241	7.6844	9.6894	12.6753	20.8978	20.4148	118	171	224	306	655	416	1.14203	0.000128412	0.00425127	up	CM027382.1	188804	197402	+	--	--	--	--	Imidazolonepropionase [Nymphaea thermarum]	--	A0A5K1FAD7_9MAGN SubName: Full=Uncharacterized protein {ECO:0000313|EMBL:VVW59620.1}; Flags: Fragment;	--	GO:0016810,hydrolase activity, acting on carbon-nitrogen (but not peptide) bonds; GO:0003674,molecular_function; GO:0003824,catalytic activity; GO:0016787,hydrolase activity	--	--	--	--
IFM89_022614	2.3342	2.3041	2.0473	4.5092	6.3674	4.413	61	65	60	138	253	114	1.1156	0.000139418	0.00456491	up	CM027379.1	4379307	4381381	+	IFM89_022614	--	K15403 fatty acid omega-hydroxy dehydrogenase [EC:1.1.-.-] | (RefSeq) protein HOTHEAD-like isoform X1 (A)	ko00073: Cutin, suberine and wax biosynthesis	hypothetical protein IFM89_022614 [Coptis chinensis]	HTH_ARATH RecName: Full=Protein HOTHEAD; AltName: Full=Protein ADHESION OF CALYX EDGES; Flags: Precursor;	A0A835IET5_9MAGN RecName: Full=GMC_OxRdtase_N domain-containing protein {ECO:0000259|PROSITE:PS00624};	Glucose dehydrogenase/choline dehydrogenase/mandelonitrile lyase (GMC oxidoreductase family)	GO:0005576,extracellular region; GO:0050660,flavin adenine dinucleotide binding; GO:0046593,mandelonitrile lyase activity; GO:0016614,oxidoreductase activity, acting on CH-OH group of donors; GO:0007267,cell-cell signaling; GO:0009553,embryo sac development; GO:0010430,fatty acid omega-oxidation; GO:0000166,nucleotide binding; GO:0003674,molecular_function; GO:0005488,binding; GO:0036094,small mo…	PF00732.22:GMC oxidoreductase	--	--	--
IFM89_005728	4.8336	8.8287	20.1275	42.598	39.3484	31.0918	106	209	495	1094	1312	674	1.65673	0.000143111	0.0046421	up	CM027378.1	102319942	102321542	+	IFM89_005728	--	--	--	hypothetical protein IFM89_005728 [Coptis chinensis]	PRP2_ARATH RecName: Full=Proline-rich protein 2; Short=AtPRP2; Flags: Precursor;	A0A835IL32_9MAGN SubName: Full=Uncharacterized protein {ECO:0000313|EMBL:KAF9619174.1};	--	GO:0005576,extracellular region; GO:0009664,plant-type cell wall organization; GO:0008150,biological_process; GO:0009987,cellular process; GO:0016043,cellular component organization; GO:0045229,external encapsulating structure organization; GO:0071554,cell wall organization or biogenesis; GO:0071555,cell wall organization; GO:0071669,plant-type cell wall organization or biogenesis; GO:0071840,cel…	PF01190.20:Pollen protein Ole e 1 like	--	--	--
IFM89_000142	1.9352	2.2645	1.7257	5.8273	5.1582	7.5219	19	24	19	67	77	73	1.55471	0.000146047	0.00472264	up	CM027384.1	48048722	48049333	+	IFM89_000142	--	--	--	hypothetical protein IFM89_000142 [Coptis chinensis]	--	A0A835H1I9_9MAGN SubName: Full=Uncharacterized protein {ECO:0000313|EMBL:KAF9590886.1};	FKBP-type peptidyl-prolyl cis-trans isomerase	--	PF00504.24:Chlorophyll A-B binding protein	--	--	--
IFM89_028777	6.4246	11.6155	3.8121	1.448	3.4086	1.5705	269	525	179	71	217	65	-1.8431	0.000146579	0.00472827	down	CM027385.1	83165536	83168744	+	IFM89_028777	--	K01187 alpha-glucosidase [EC:3.2.1.20] | (RefSeq) alpha-glucosidase (A)	ko00052: Galactose metabolism; ko00500: Starch and sucrose metabolism; ko01100: Metabolic pathways; ko01110: Biosynthesis of secondary metabolites	hypothetical protein IFM89_028777 [Coptis chinensis]	AGLU_SPIOL RecName: Full=Alpha-glucosidase; EC=3.2.1.20; AltName: Full=Maltase; Flags: Precursor;	A0A835H1G1_9MAGN SubName: Full=Uncharacterized protein {ECO:0000313|EMBL:KAF9589842.1};	Maltase glucoamylase and related hydrolases, glycosyl hydrolase family 31	GO:0030246,carbohydrate binding; GO:0032450,maltose alpha-glucosidase activity; GO:0003674,molecular_function; GO:0005488,binding; GO:0003824,catalytic activity; GO:0004553,hydrolase activity, hydrolyzing O-glycosyl compounds; GO:0004558,alpha-1,4-glucosidase activity; GO:0015926,glucosidase activity; GO:0016787,hydrolase activity; GO:0016798,hydrolase activity, acting on glycosyl bonds; GO:00905…	PF01055.29:Glycosyl hydrolases family 31	--	--	--
IFM89_014413	6.8674	9.5427	13.1896	19.9229	24.3787	22.7123	78	117	168	265	421	255	1.09394	0.000146948	0.00472978	up	CM027380.1	70218551	70220411	+	IFM89_014413	--	K12835 ATP-dependent RNA helicase DDX42 [EC:3.6.4.13] | (RefSeq) DEAD-box ATP-dependent RNA helicase 24 isoform X1 (A)	ko03040: Spliceosome	hypothetical protein IFM89_014413 [Coptis chinensis]	WRK51_ARATH RecName: Full=Probable WRKY transcription factor 51; AltName: Full=WRKY DNA-binding protein 51;	A0A835LZW9_9MAGN RecName: Full=WRKY domain-containing protein {ECO:0000259|PROSITE:PS50811};	--	GO:0005634,nucleus; GO:0003700,DNA-binding transcription factor activity; GO:0043565,sequence-specific DNA binding; GO:0042742,defense response to bacterium; GO:0050832,defense response to fungus; GO:0009867,jasmonic acid mediated signaling pathway; GO:0003674,molecular_function; GO:0140110,transcription regulator activity; GO:0003676,nucleic acid binding; GO:0003677,DNA binding; GO:0005488,bindi…	PF03106.18:WRKY DNA -binding domain	WRKY	TF	WRKY
novel.3123	0.0408	5.8942	4.0006	0.0116	0	0.055	3	468	330	1	0	4	-7.34795	0.00015207	0.00484695	down	CM027380.1	11926745	12025422	-	--	--	K07904 Ras-related protein Rab-11A | (RefSeq) ras-related protein Rab11D (A)	ko04144: Endocytosis	hypothetical protein IFM89_016991 [Coptis chinensis]	ABCG1_PETHY RecName: Full=ABC transporter G family member 1 {ECO:0000303|PubMed:22345641}; Short=ABC transporter ABCG.1 {ECO:0000303|PubMed:22345641}; Short=PhABCG1 {ECO:0000303|PubMed:22345641};	A0A835I0P3_9MAGN SubName: Full=Uncharacterized protein {ECO:0000313|EMBL:KAF9609555.1};	--	GO:0016021,integral component of membrane; GO:0005886,plasma membrane; GO:0140359,ABC-type transporter activity; GO:0005524,ATP binding; GO:0010597,green leaf volatile biosynthetic process; GO:0055085,transmembrane transport; GO:0003674,molecular_function; GO:0005215,transporter activity; GO:0015399,primary active transmembrane transporter activity; GO:0022804,active transmembrane transporter act…	PF01061.27:ABC-2 type transporter	--	--	--
IFM89_037098	12.5675	8.7634	20.3756	30.1652	29.0051	45.3533	275	207	500	773	965	981	1.24203	0.000152215	0.00484695	up	CM027382.1	5244945	5248265	-	IFM89_037098	--	K13066 caffeic acid 3-O-methyltransferase / acetylserotonin O-methyltransferase [EC:2.1.1.68 2.1.1.4] | (RefSeq) caffeic acid 3-O-methyltransferase 1-like (A)	ko00380: Tryptophan metabolism; ko00940: Phenylpropanoid biosynthesis; ko01100: Metabolic pathways; ko01110: Biosynthesis of secondary metabolites	hypothetical protein IFM89_037098 [Coptis chinensis]	COMT1_PRUDU RecName: Full=Caffeic acid 3-O-methyltransferase; Short=CAOMT; Short=COMT; EC=2.1.1.68; AltName: Full=S-adenosysl-L-methionine:caffeic acid 3-O-methyltransferase;	A0A835HQF9_9MAGN SubName: Full=Uncharacterized protein {ECO:0000313|EMBL:KAF9603599.1};	Hydroxyindole-O-methyltransferase and related SAM-dependent methyltransferases	GO:0047763,caffeate O-methyltransferase activity; GO:0046983,protein dimerization activity; GO:0009809,lignin biosynthetic process; GO:0032259,methylation; GO:0003674,molecular_function; GO:0003824,catalytic activity; GO:0008168,methyltransferase activity; GO:0008171,O-methyltransferase activity; GO:0016740,transferase activity; GO:0016741,transferase activity, transferring one-carbon groups; GO:…	PF00891.21:O-methyltransferase domain	--	--	--
IFM89_003673	1.8027	1.5528	1.9177	4.4019	3.3489	3.7433	57	53	68	163	161	117	1.03748	0.000153611	0.00486537	up	CM027382.1	20605100	20607764	+	IFM89_003673	--	K20718 LRR receptor-like serine/threonine-protein kinase ERECTA [EC:2.7.11.1] | (RefSeq) LRR receptor-like serine/threonine-protein kinase ERECTA (A)	ko04016: MAPK signaling pathway - plant	hypothetical protein IFM89_003673 [Coptis chinensis]	Y5720_ARATH RecName: Full=Probable inactive receptor kinase At5g67200; Flags: Precursor;	A0A835HJH2_9MAGN RecName: Full=Protein kinase domain-containing protein {ECO:0000259|PROSITE:PS50011};	--	GO:0016021,integral component of membrane; GO:0005886,plasma membrane; GO:0005524,ATP binding; GO:0004672,protein kinase activity; GO:0006468,protein phosphorylation; GO:0000166,nucleotide binding; GO:0003674,molecular_function; GO:0005488,binding; GO:0017076,purine nucleotide binding; GO:0030554,adenyl nucleotide binding; GO:0032553,ribonucleotide binding; GO:0032555,purine ribonucleotide bindin…	PF00069.28:Protein kinase domain	--	--	--
IFM89_023121	8.6998	8.9717	15.6252	56.522	21.9699	22.7083	212	236	427	1613	814	547	1.51454	0.000153727	0.00486537	up	CM027381.1	97511533	97513253	+	IFM89_023121	--	K23157 3-O-acetyl-4'-O-demethylpapaveroxine 4'-O-methyltransferase subunit OMT2 [EC:2.1.1.352] | (RefSeq) (RS)-norcoclaurine 6-O-methyltransferase-like (A)	ko00950: Isoquinoline alkaloid biosynthesis; ko01100: Metabolic pathways; ko01110: Biosynthesis of secondary metabolites	6-O-methyltransferase 1, partial [Coptis chinensis]	OMT2B_PAPSO RecName: Full=Probable scoulerine-9-O-methyltransferase OMT2B {ECO:0000305}; EC=2.1.1.117 {ECO:0000250|UniProtKB:I3PLQ6}; AltName: Full=Inactive 3-O-acetyl-4'-O-demethylpapaveroxine 4'-O-methyltransferase OMT2B {ECO:0000305}; AltName: Full=O-methyltransferase 2b {ECO:0000303|PubMed:29723437}; Short=OMT2b {ECO:0000303|PubMed:29723437};	A0A2Z5FRS1_9MAGN SubName: Full=6-O-methyltransferase 1 {ECO:0000313|EMBL:AXC09385.1}; Flags: Fragment;	Hydroxyindole-O-methyltransferase and related SAM-dependent methyltransferases	GO:0030777,(S)-scoulerine 9-O-methyltransferase activity; GO:0008171,O-methyltransferase activity; GO:0046983,protein dimerization activity; GO:0009820,alkaloid metabolic process; GO:0032259,methylation; GO:0003674,molecular_function; GO:0003824,catalytic activity; GO:0008168,methyltransferase activity; GO:0008757,S-adenosylmethionine-dependent methyltransferase activity; GO:0016740,transferase a…	PF00891.21:O-methyltransferase domain	--	--	--
IFM89_032158	3.0732	3.3143	7.035	15.0402	9.2615	14.9878	67	78	172	384	307	323	1.4616	0.000158321	0.00495589	up	CM027377.1	27775115	27790052	+	IFM89_032158	--	--	--	hypothetical protein IFM89_032158 [Coptis chinensis]	RSS3_ORYSJ RecName: Full=Protein RICE SALT SENSITIVE 3 {ECO:0000303|PubMed:23715469};	A0A835IZL9_9MAGN RecName: Full=bHLH-MYC_N domain-containing protein {ECO:0000259|Pfam:PF14215};	--	GO:0005737,cytoplasm; GO:0005634,nucleus; GO:0005575,cellular_component; GO:0005622,intracellular anatomical structure; GO:0110165,cellular anatomical entity; GO:0043226,organelle; GO:0043227,membrane-bounded organelle; GO:0043229,intracellular organelle; GO:0043231,intracellular membrane-bounded organelle	PF14215.9:bHLH-MYC and R2R3-MYB transcription factors N-terminal	--	--	--
IFM89_006153	11.5712	15.9636	12.2042	6.3215	8.4696	4.9718	186	277	220	119	207	79	-1.08491	0.000167195	0.00518155	down	CM027385.1	79789179	79793002	+	IFM89_006153	--	K08272 calcium binding protein 39 | (RefSeq) putative MO25-like protein At5g47540 (A)	--	hypothetical protein IFM89_006153 [Coptis chinensis]	MO25N_ARATH RecName: Full=Putative MO25-like protein At5g47540;	A0A835GVU0_9MAGN SubName: Full=Uncharacterized protein {ECO:0000313|EMBL:KAF9587899.1};	Conserved protein Mo25	GO:0009536,plastid; GO:0043539,protein serine/threonine kinase activator activity; GO:0035556,intracellular signal transduction; GO:0003674,molecular_function; GO:0008047,enzyme activator activity; GO:0019207,kinase regulator activity; GO:0019209,kinase activator activity; GO:0019887,protein kinase regulator activity; GO:0030234,enzyme regulator activity; GO:0030295,protein kinase activator activ…	PF08569.14:Mo25-like	--	--	--
IFM89_023735	39.1347	8.4947	1.2511	0.1712	0.3955	1.0645	781	183	28	4	12	21	-4.98992	0.000176933	0.00539518	down	CM027379.1	117475601	117477894	+	IFM89_023735	--	K08287 dual-specificity kinase [EC:2.7.12.1] | (RefSeq) serine/threonine-protein kinase AFC2 isoform X1 (A)	--	hypothetical protein IFM89_023735 [Coptis chinensis]	AFC2_ARATH RecName: Full=Serine/threonine-protein kinase AFC2; EC=2.7.12.1;	A0A835IFI9_9MAGN RecName: Full=Protein kinase domain-containing protein {ECO:0000259|PROSITE:PS50011};	LAMMER dual specificity kinases	GO:0005634,nucleus; GO:0005524,ATP binding; GO:0004672,protein kinase activity; GO:0106310,protein serine kinase activity; GO:0004674,protein serine/threonine kinase activity; GO:0004712,protein serine/threonine/tyrosine kinase activity; GO:0004713,protein tyrosine kinase activity; GO:0006397,mRNA processing; GO:0046777,protein autophosphorylation; GO:0006468,protein phosphorylation; GO:0000166,n…	PF00069.28:Protein kinase domain	--	--	--
novel.7006	9.156	7.7965	12.989	5.2517	5.7178	4.7248	198	182	315	133	188	101	-1.01349	0.000181922	0.00551814	down	CM027384.1	76338011	76346755	-	--	--	K03843 alpha-1,3/alpha-1,6-mannosyltransferase [EC:2.4.1.132 2.4.1.257] | (RefSeq) alpha-1,3/1,6-mannosyltransferase ALG2 (A)	ko00510: N-Glycan biosynthesis; ko00513: Various types of N-glycan biosynthesis; ko01100: Metabolic pathways	hypothetical protein IFM89_037025 [Coptis chinensis]	--	A0A835HS01_9MAGN RecName: Full=Alpha-1,3/1,6-mannosyltransferase ALG2 {ECO:0000256|RuleBase:RU367136}; EC=2.4.1.132 {ECO:0000256|RuleBase:RU367136}; EC=2.4.1.257 {ECO:0000256|RuleBase:RU367136}; AltName: Full=GDP-Man:Man(1)GlcNAc(2)-PP-Dol alpha-1,3-mannosyltransferase {ECO:0000256|RuleBase:RU367136};	Glycosyltransferase	GO:0016021,integral component of membrane; GO:0004378,GDP-Man:Man1GlcNAc2-PP-Dol alpha-1,3-mannosyltransferase activity; GO:0102704,GDP-Man:Man2GlcNAc2-PP-dolichol alpha-1,6-mannosyltransferase activity; GO:0006486,protein glycosylation; GO:0000030,mannosyltransferase activity; GO:0003674,molecular_function; GO:0003824,catalytic activity; GO:0004376,glycolipid mannosyltransferase activity; GO:001…	--	--	--	--
IFM89_034163	2.0379	2.9312	3.0925	8.9909	5.1732	4.937	114	177	194	589	440	273	1.15635	0.000187827	0.0056289	up	CM027382.1	41976727	41984967	-	IFM89_034163	--	K11498 centromeric protein E | (RefSeq) kinesin-like protein KIN-7E (A)	--	hypothetical protein IFM89_034163 [Coptis chinensis]	KN7F_ORYSJ RecName: Full=Kinesin-like protein KIN-7F {ECO:0000305};	A0A835HRY9_9MAGN RecName: Full=Kinesin-like protein {ECO:0000256|RuleBase:RU000394};	Kinesin-like protein	GO:0005874,microtubule; GO:0005524,ATP binding; GO:0016887,ATP hydrolysis activity; GO:0008017,microtubule binding; GO:0003777,microtubule motor activity; GO:0007018,microtubule-based movement; GO:0000166,nucleotide binding; GO:0003674,molecular_function; GO:0005488,binding; GO:0017076,purine nucleotide binding; GO:0030554,adenyl nucleotide binding; GO:0032553,ribonucleotide binding; GO:0032555,p…	PF00225.26:Kinesin motor domain	--	--	--
IFM89_037931	26.6369	21.2747	35.4543	53.695	46.9832	120.826	682	588	1018	1610	1829	3058	1.32766	0.000196015	0.00580723	up	CM027382.1	39479843	39481621	+	IFM89_037931	--	K00430 peroxidase [EC:1.11.1.7] | (RefSeq) cationic peroxidase 2-like (A)	ko00940: Phenylpropanoid biosynthesis; ko01100: Metabolic pathways; ko01110: Biosynthesis of secondary metabolites	hypothetical protein IFM89_037931 [Coptis chinensis]	PERN1_TOBAC RecName: Full=Peroxidase N1; EC=1.11.1.7; AltName: Full=Peroxidase B2; AltName: Full=Peroxidase B3; Flags: Precursor;	A0A835HSU3_9MAGN RecName: Full=Peroxidase {ECO:0000256|RuleBase:RU362060}; EC=1.11.1.7 {ECO:0000256|RuleBase:RU362060};	--	GO:0005576,extracellular region; GO:0009505,plant-type cell wall; GO:0020037,heme binding; GO:0046872,metal ion binding; GO:0004601,peroxidase activity; GO:0042744,hydrogen peroxide catabolic process; GO:0006979,response to oxidative stress; GO:0003674,molecular_function; GO:0005488,binding; GO:0046906,tetrapyrrole binding; GO:0097159,organic cyclic compound binding; GO:1901363,heterocyclic compo…	PF00141.26:Peroxidase	--	--	--
IFM89_026276	70.6125	127.541	130.601	341.727	172.658	248.822	418	815	867	2369	1554	1456	1.12749	0.000202647	0.00596978	up	CM027377.1	26524935	26525899	-	IFM89_026276	--	--	--	hypothetical protein IFM89_026276 [Coptis chinensis]	GASAE_ARATH RecName: Full=Gibberellin-regulated protein 14; AltName: Full=GAST1 protein homolog 14; Flags: Precursor;	A0A835IX49_9MAGN SubName: Full=Uncharacterized protein {ECO:0000313|EMBL:KAF9625696.1};	--	GO:0005576,extracellular region; GO:0005886,plasma membrane; GO:0009536,plastid; GO:0009740,gibberellic acid mediated signaling pathway; GO:2000377,regulation of reactive oxygen species metabolic process; GO:0009737,response to abscisic acid; GO:0009739,response to gibberellin; GO:0009651,response to salt stress; GO:0007154,cell communication; GO:0007165,signal transduction; GO:0008150,biological…	--	--	--	--
IFM89_017070	12.1782	17.8364	30.3032	62.805	35.331	57.1193	253	400	706	1528	1116	1173	1.27748	0.000206168	0.00604788	up	CM027377.1	32566879	32570032	+	IFM89_017070	--	K13691 pathogen-inducible salicylic acid glucosyltransferase [EC:2.4.1.-] | (RefSeq) mogroside IE synthase-like (A)	--	hypothetical protein IFM89_017070 [Coptis chinensis]	U74F2_ARATH RecName: Full=UDP-glycosyltransferase 74F2; EC=2.4.1.-; AltName: Full=AtSGT1; AltName: Full=Salicylic acid glucosyltransferase 1;	A0A835IVT1_9MAGN SubName: Full=Uncharacterized protein {ECO:0000313|EMBL:KAF9625021.1};	UDP-glucuronosyl and UDP-glucosyl transferase	GO:0005829,cytosol; GO:0052641,benzoic acid glucosyltransferase activity; GO:0090704,nicotinate-O-glucosyltransferase activity; GO:0080043,quercetin 3-O-glucosyltransferase activity; GO:0080044,quercetin 7-O-glucosyltransferase activity; GO:0052639,salicylic acid glucosyltransferase (ester-forming) activity; GO:0052640,salicylic acid glucosyltransferase (glucoside-forming) activity; GO:0080002,UD…	PF00201.21:UDP-glucoronosyl and UDP-glucosyl transferase	--	--	--
IFM89_017305	9.0463	13.0942	19.5365	49.0036	52.1538	23.3079	64	100	155	406	561	163	1.49344	0.000210073	0.00614516	up	CM027384.1	89174903	89175426	+	IFM89_017305	--	--	--	hypothetical protein IFM89_017305 [Coptis chinensis]	CV_ARATH RecName: Full=Protein CHLOROPLAST VESICULATION {ECO:0000303|PubMed:25538186}; Flags: Precursor;	A0A835LFF7_9MAGN SubName: Full=Uncharacterized protein {ECO:0000313|EMBL:KAF9592735.1};	--	GO:0009941,chloroplast envelope; GO:0031969,chloroplast membrane; GO:0009535,chloroplast thylakoid membrane; GO:0016021,integral component of membrane; GO:0097708,intracellular vesicle; GO:0005773,vacuole; GO:1904821,chloroplast disassembly; GO:0010150,leaf senescence; GO:0009735,response to cytokinin; GO:0006979,response to oxidative stress; GO:1902074,response to salt; GO:0009414,response to wa…	--	--	--	--
IFM89_004788	2.1108	3.4831	1.7646	7.0408	8.3297	5.6721	32	57	30	125	192	85	1.43436	0.0002124	0.00618718	up	CM027379.1	74058600	74059821	+	IFM89_004788	--	K23947 2-oxoglutarate-dependent dioxygenase [EC:1.14.11.-] | (RefSeq) 2-oxoglutarate-dependent dioxygenase DAO-like (A)	ko00380: Tryptophan metabolism	hypothetical protein IFM89_004788 [Coptis chinensis]	AOP1L_ARATH RecName: Full=Probable 2-oxoglutarate-dependent dioxygenase AOP1.2; EC=1.14.11.-;	A0A835M3T9_9MAGN RecName: Full=Fe2OG dioxygenase domain-containing protein {ECO:0000259|PROSITE:PS51471};	Iron/ascorbate family oxidoreductases	GO:0051213,dioxygenase activity; GO:0046872,metal ion binding; GO:0003674,molecular_function; GO:0003824,catalytic activity; GO:0016491,oxidoreductase activity; GO:0005488,binding; GO:0043167,ion binding; GO:0043169,cation binding	PF03171.23:2OG-Fe(II) oxygenase superfamily	--	--	--
novel.5164	4.8626	8.0025	5.1919	4.0362	2.7812	2.0336	537	954	643	522	467	222	-1.11508	0.000213875	0.00621281	down	CM027382.1	73043395	73050685	-	--	--	K00423 L-ascorbate oxidase [EC:1.10.3.3] | (RefSeq) L-ascorbate oxidase homolog (A)	ko00053: Ascorbate and aldarate metabolism; ko01100: Metabolic pathways	Pentatricopeptide repeat-containing protein, partial [Thalictrum thalictroides]	PP392_ARATH RecName: Full=Pentatricopeptide repeat-containing protein At5g18475;	A0A7J6V0G2_THATH SubName: Full=Pentatricopeptide repeat-containing protein {ECO:0000313|EMBL:KAF5177755.1}; Flags: Fragment;	FOG: PPR repeat	--	PF13041.9:PPR repeat family	--	--	--
novel.1660	3.4364	3.2861	3.0313	1.1359	1.8227	1.4578	93	96	92	36	75	39	-1.21783	0.000217374	0.00628817	down	CM027378.1	103889319	103894456	-	--	--	K15535 phosphoglucan, water dikinase [EC:2.7.9.5] | (RefSeq) phosphoglucan, water dikinase, chloroplastic (A)	--	hypothetical protein IFM89_019929 [Coptis chinensis]	PWD_ARATH RecName: Full=Phosphoglucan, water dikinase, chloroplastic; EC=2.7.9.5; Flags: Precursor;	A0A835M0T4_9MAGN RecName: Full=CBM20 domain-containing protein {ECO:0000259|PROSITE:PS51166};	--	GO:0009507,chloroplast; GO:0009570,chloroplast stroma; GO:0009536,plastid; GO:0102217,6-phosphoglucan, water dikinase activity; GO:0005524,ATP binding; GO:0019200,carbohydrate kinase activity; GO:0046872,metal ion binding; GO:0051752,phosphoglucan, water dikinase activity; GO:0102219,phosphogluco-amylopectin water dikinase activity; GO:2001070,starch binding; GO:0046777,protein autophosphorylatio…	--	--	--	--
IFM89_023655	3.484	2.7913	4.9539	4.8243	26.2585	23.6237	37	32	59	60	424	248	2.20614	0.000222283	0.00640352	up	CM027381.1	96891184	96895947	+	IFM89_023655	--	K20769 fatty acid omega-hydroxylase [EC:1.14.-.-] | (RefSeq) cytochrome P450 94A2 (A)	ko00073: Cutin, suberine and wax biosynthesis	hypothetical protein IFM89_023655 [Coptis chinensis]	ICI_LINUS RecName: Full=Proteinase inhibitor; AltName: Full=LUTI;	A0A835HSK8_9MAGN SubName: Full=Uncharacterized protein {ECO:0000313|EMBL:KAF9606200.1};	--	GO:0004867,serine-type endopeptidase inhibitor activity; GO:0009611,response to wounding; GO:0003674,molecular_function; GO:0004857,enzyme inhibitor activity; GO:0004866,endopeptidase inhibitor activity; GO:0030234,enzyme regulator activity; GO:0030414,peptidase inhibitor activity; GO:0061134,peptidase regulator activity; GO:0061135,endopeptidase regulator activity; GO:0098772,molecular function …	PF00280.21:Potato inhibitor I family	--	--	--
IFM89_002660	6.2138	8.9999	10.8619	18.2761	21.991	15.0167	126	197	247	434	678	301	1.00047	0.000225534	0.00647037	up	CM027378.1	78710776	78713066	+	IFM89_002660	--	K07025 putative hydrolase of the HAD superfamily | (RefSeq) uncharacterized protein LOC117913851 (A)	--	hypothetical protein IFM89_002660 [Coptis chinensis]	--	A0A835ILQ1_9MAGN SubName: Full=Uncharacterized protein {ECO:0000313|EMBL:KAF9618792.1};	Haloacid dehalogenase-like hydrolase	--	PF13419.9:Haloacid dehalogenase-like hydrolase	--	--	--
IFM89_019959	0.5806	0.8452	0.7396	2.6915	2.4004	1.8041	14	22	20	76	88	43	1.58634	0.000233254	0.00666437	up	CM027383.1	22854980	22859708	-	IFM89_019959	--	K14780 ATP-dependent RNA helicase DHX37/DHR1 [EC:3.6.4.13] | (RefSeq) ATP-dependent RNA helicase DEAH13-like isoform X1 (A)	--	hypothetical protein IFM89_019959 [Coptis chinensis]	--	A0A835HEA9_9MAGN SubName: Full=Uncharacterized protein {ECO:0000313|EMBL:KAF9597591.1};	Galactosyltransferases	GO:0016021,integral component of membrane; GO:0005575,cellular_component; GO:0016020,membrane; GO:0031224,intrinsic component of membrane; GO:0110165,cellular anatomical entity	PF04646.15:Protein of unknown function, DUF604	--	--	--
novel.4732	6.136	5.4717	4.6022	0.9794	2.791	1.3343	107	103	90	20	74	23	-1.73216	0.000241821	0.00686212	down	CM027382.1	14311842	14313523	-	--	--	--	--	hypothetical protein IFM89_036071 [Coptis chinensis]	PP334_ARATH RecName: Full=Pentatricopeptide repeat-containing protein At4g21705, mitochondrial; Flags: Precursor;	A0A835HZ32_9MAGN SubName: Full=Uncharacterized protein {ECO:0000313|EMBL:KAF9607474.1};	FOG: PPR repeat	GO:0005739,mitochondrion; GO:0005575,cellular_component; GO:0005622,intracellular anatomical structure; GO:0005737,cytoplasm; GO:0043226,organelle; GO:0043227,membrane-bounded organelle; GO:0043229,intracellular organelle; GO:0043231,intracellular membrane-bounded organelle; GO:0110165,cellular anatomical entity	--	--	--	--
IFM89_038891	25.7679	18.1721	40.957	13.1319	12.4972	15.1427	377	287	672	225	278	219	-1.14272	0.000244799	0.00690902	down	CM027377.1	29713045	29714599	-	IFM89_038891	--	K21630 GATA-type zinc finger protein 1 | (RefSeq) GATA transcription factor 6-like (A)	--	hypothetical protein IFM89_038891 [Coptis chinensis]	GATA1_ARATH RecName: Full=GATA transcription factor 1; Short=AtGATA-1;	A0A835J2G2_9MAGN RecName: Full=GATA-type domain-containing protein {ECO:0000259|PROSITE:PS50114};	GATA-4/5/6 transcription factors	GO:0005634,nucleus; GO:0003700,DNA-binding transcription factor activity; GO:0000976,transcription cis-regulatory region binding; GO:0008270,zinc ion binding; GO:0030154,cell differentiation; GO:0007623,circadian rhythm; GO:0003674,molecular_function; GO:0140110,transcription regulator activity; GO:0001067,transcription regulatory region nucleic acid binding; GO:0003676,nucleic acid binding; GO:0…	PF00320.30:GATA zinc finger	C2C2-GATA	TF	C2C2->C2C2-GATA
IFM89_034550	1.8396	2.2899	1.8283	9.3431	5.2177	3.0435	96	129	107	571	414	157	1.47522	0.000248081	0.00699221	up	CM027382.1	69518615	69526636	+	IFM89_034550	--	K01535 H+-transporting ATPase [EC:7.1.2.1] | (RefSeq) plasma membrane ATPase 1 (A)	ko00190: Oxidative phosphorylation; ko01100: Metabolic pathways	hypothetical protein IFM89_034550 [Coptis chinensis]	PMA11_ARATH RecName: Full=ATPase 11, plasma membrane-type; EC=7.1.2.1; AltName: Full=Proton pump 11;	A0A835LSH1_9MAGN RecName: Full=Plasma membrane ATPase {ECO:0000256|RuleBase:RU362083}; EC=7.1.2.1 {ECO:0000256|RuleBase:RU362083};	Plasma membrane H+-transporting ATPase	GO:0016021,integral component of membrane; GO:0005886,plasma membrane; GO:0005524,ATP binding; GO:0016887,ATP hydrolysis activity; GO:0046872,metal ion binding; GO:0003729,mRNA binding; GO:0015662,P-type ion transporter activity; GO:0008553,P-type proton-exporting transporter activity; GO:0034220,ion transmembrane transport; GO:0120029,proton export across plasma membrane; GO:1902600,proton trans…	PF00122.23:E1-E2 ATPase	--	--	--
IFM89_032562	1.0983	1.5399	1.6675	3.6246	4.4122	2.7326	37	56	63	143	226	91	1.24035	0.000251659	0.00706125	up	CM027380.1	72482754	72486436	-	IFM89_032562	--	--	--	hypothetical protein IFM89_032562 [Coptis chinensis]	NCL2_ORYSJ RecName: Full=Sodium/calcium exchanger NCL2 {ECO:0000305}; AltName: Full=Na(+)/Ca(2+)-exchange protein NCL2 {ECO:0000305}; AltName: Full=OsEFCAX2 {ECO:0000303|PubMed:24286292}; AltName: Full=Protein NCX-like 2 {ECO:0000305}; Short=OsNCL2 {ECO:0000305};	A0A835M5J8_9MAGN SubName: Full=Uncharacterized protein {ECO:0000313|EMBL:KAF9611516.1};	--	GO:0016021,integral component of membrane; GO:0005886,plasma membrane; GO:0005774,vacuolar membrane; GO:0005509,calcium ion binding; GO:0015369,calcium:proton antiporter activity; GO:0070588,calcium ion transmembrane transport; GO:0006874,cellular calcium ion homeostasis; GO:0006814,sodium ion transport; GO:0003674,molecular_function; GO:0005488,binding; GO:0043167,ion binding; GO:0043169,cation …	PF00036.35:EF hand	--	--	--
IFM89_034856	4.3104	8.2318	3.814	1.3024	2.7041	1.0398	130	268	129	46	124	31	-1.76999	0.000252361	0.00706508	down	CM027380.1	107684725	107691914	+	IFM89_034856	--	K09571 FK506-binding protein 4/5 [EC:5.2.1.8] | (RefSeq) peptidyl-prolyl cis-trans isomerase FKBP62 (A)	--	hypothetical protein IFM89_034856 [Coptis chinensis]	FKB65_ARATH RecName: Full=Peptidyl-prolyl cis-trans isomerase FKBP65; Short=PPIase FKBP65; EC=5.2.1.8; AltName: Full=70 kDa peptidyl-prolyl isomerase; AltName: Full=FK506-binding protein 65; Short=AtFKBP65; AltName: Full=Immunophilin FKBP65; AltName: Full=Peptidyl-prolyl isomerase ROF2; AltName: Full=Protein ROTAMASE FKBP 2; AltName: Full=Rotamase;	A0A835I808_9MAGN RecName: Full=Peptidylprolyl isomerase {ECO:0000256|PROSITE-ProRule:PRU00277}; EC=5.2.1.8 {ECO:0000256|PROSITE-ProRule:PRU00277};	FKBP-type peptidyl-prolyl cis-trans isomerase	GO:0005737,cytoplasm; GO:0005634,nucleus; GO:0000325,plant-type vacuole; GO:0009536,plastid; GO:0005516,calmodulin binding; GO:0003755,peptidyl-prolyl cis-trans isomerase activity; GO:0070370,cellular heat acclimation; GO:0061077,chaperone-mediated protein folding; GO:0000413,protein peptidyl-prolyl isomerization; GO:0003674,molecular_function; GO:0005488,binding; GO:0005515,protein binding; GO:0…	PF00254.31:FKBP-type peptidyl-prolyl cis-trans isomerase	--	--	--
IFM89_013281	4.6302	6.0617	5.4936	1.8298	3.2969	2.4775	121	171	161	56	131	64	-1.16655	0.000255844	0.00709346	down	CM027377.1	2397728	2404522	+	IFM89_013281	--	K22374 3''-deamino-3''-oxonicotianamine reductase [EC:1.1.1.285] | (RefSeq) non-functional NADPH-dependent codeinone reductase 2-like (A)	ko00999: Biosynthesis of various plant secondary metabolites; ko01100: Metabolic pathways; ko01110: Biosynthesis of secondary metabolites	hypothetical protein IFM89_013281 [Coptis chinensis]	MER_ERYCB RecName: Full=Methylecgonone reductase; Short=MecgoR; EC=1.1.1.334;	A0A835M9P1_9MAGN RecName: Full=Aldo_ket_red domain-containing protein {ECO:0000259|Pfam:PF00248};	Aldo/keto reductase family proteins	GO:0016616,oxidoreductase activity, acting on the CH-OH group of donors, NAD or NADP as acceptor; GO:1901869,ecgonine methyl ester biosynthetic process; GO:1901868,ecgonine methyl ester catabolic process; GO:1901872,ecgonone methyl ester biosynthetic process; GO:1901871,ecgonone methyl ester catabolic process; GO:0003674,molecular_function; GO:0003824,catalytic activity; GO:0016491,oxidoreductase…	PF00248.24:Aldo/keto reductase family	--	--	--
IFM89_007465	2.5875	7.1909	6.4674	13.2903	12.2478	29.547	66	198	185	397	475	745	1.67674	0.000256241	0.00709346	up	CM027383.1	40563741	40565587	-	IFM89_007465	--	K02575 MFS transporter, NNP family, nitrate/nitrite transporter | (RefSeq) high affinity nitrate transporter 2.4-like (A)	ko00910: Nitrogen metabolism	hypothetical protein IFM89_007465 [Coptis chinensis]	NRT24_ARATH RecName: Full=High affinity nitrate transporter 2.4; Short=AtNRT2:4;	A0A835HDA2_9MAGN SubName: Full=Uncharacterized protein {ECO:0000313|EMBL:KAF9596147.1};	--	GO:0016021,integral component of membrane; GO:0009705,plant-type vacuole membrane; GO:0005886,plasma membrane; GO:0015112,nitrate transmembrane transporter activity; GO:0071249,cellular response to nitrate; GO:0042128,nitrate assimilation; GO:0015706,nitrate transmembrane transport; GO:0003674,molecular_function; GO:0005215,transporter activity; GO:0008509,anion transmembrane transporter activity…	PF07690.19:Major Facilitator Superfamily	--	--	--
IFM89_030901	18.5086	21.9628	16.8078	6.343	13.8017	7.6712	598	766	609	240	678	245	-1.12095	0.000257345	0.00710921	down	CM027380.1	84951830	84955745	+	IFM89_030901	--	K10695 E3 ubiquitin-protein ligase RNF1/2 [EC:2.3.2.27] | (RefSeq) putative E3 ubiquitin-protein ligase RING1a (A)	--	hypothetical protein IFM89_030901 [Coptis chinensis]	RNG1A_ARATH RecName: Full=Putative E3 ubiquitin-protein ligase RING1a; EC=2.3.2.27; AltName: Full=Polycomb complex protein RING1a; AltName: Full=Protein RING1a; Short=AtRING1a; AltName: Full=RING-type E3 ubiquitin transferase RING1a {ECO:0000305}; AltName: Full=Ring finger protein 434;	A0A835I4Z7_9MAGN SubName: Full=Uncharacterized protein {ECO:0000313|EMBL:KAF9611356.1};	Predicted E3 ubiquitin ligase	GO:0005634,nucleus; GO:0035102,PRC1 complex; GO:0046872,metal ion binding; GO:0016740,transferase activity; GO:0001709,cell fate determination; GO:0010076,maintenance of floral meristem identity; GO:0010077,maintenance of inflorescence meristem identity; GO:0010492,maintenance of shoot apical meristem identity; GO:0045814,negative regulation of gene expression, epigenetic; GO:0045892,negative reg…	--	--	--	--
IFM89_002928	91.0298	103.84	84.2751	30.2373	48.9485	67.8159	1491	1836	1548	580	1219	1098	-1.00716	0.000266398	0.00728895	down	CM027378.1	25583811	25585075	-	IFM89_002928	--	K12198 charged multivesicular body protein 5 | (RefSeq) vacuolar protein sorting-associated protein 60.1-like (A)	ko04144: Endocytosis	hypothetical protein IFM89_002928 [Coptis chinensis]	LIRP1_ARATH RecName: Full=Light-regulated protein 1, chloroplastic {ECO:0000303|PubMed:8932388}; AltName: Full=Protein CCR-LIKE, chloroplastic {ECO:0000303|PubMed:16055688}; Flags: Precursor;	A0A835ILT8_9MAGN SubName: Full=Uncharacterized protein {ECO:0000313|EMBL:KAF9618933.1};	--	GO:0009507,chloroplast; GO:0009941,chloroplast envelope; GO:0009570,chloroplast stroma; GO:0098807,chloroplast thylakoid membrane protein complex; GO:0005829,cytosol; GO:0007623,circadian rhythm; GO:0008150,biological_process; GO:0048511,rhythmic process; GO:0005575,cellular_component; GO:0005622,intracellular anatomical structure; GO:0005737,cytoplasm; GO:0009536,plastid; GO:0043226,organelle; G…	PF07207.14:Light regulated protein Lir1	--	--	--
IFM89_028147	10.6482	14.0611	9.5246	3.8968	5.4809	7.594	322	459	323	138	252	227	-1.09701	0.000269411	0.00732608	down	CM027381.1	96192440	96195893	-	IFM89_028147	--	K09273 upstream-binding transcription factor | (RefSeq) high mobility group B protein 13-like (A)	--	hypothetical protein IFM89_028147 [Coptis chinensis]	HMG15_ARATH RecName: Full=High mobility group B protein 15; AltName: Full=Nucleosome/chromatin assembly factor group D 15;	A0A835HXY6_9MAGN SubName: Full=Uncharacterized protein {ECO:0000313|EMBL:KAF9606771.1};	DNA-binding proteins Bright/BRCAA1/RBP1 and related proteins containing BRIGHT domain	GO:0005634,nucleus; GO:0090406,pollen tube; GO:0003700,DNA-binding transcription factor activity; GO:0000400,four-way junction DNA binding; GO:0000976,transcription cis-regulatory region binding; GO:0019760,glucosinolate metabolic process; GO:0009846,pollen germination; GO:0009860,pollen tube growth; GO:0006355,regulation of DNA-templated transcription; GO:0003674,molecular_function; GO:0140110,t…	PF01388.24:ARID/BRIGHT DNA binding domain	ARID	TR	ARID
IFM89_014139	5.2677	4.6088	4.1754	1.7493	1.4436	0.3701	72	68	64	28	30	5	-2.04806	0.000277026	0.00750381	down	CM027381.1	97790110	97791399	-	IFM89_014139	--	K00327 NADPH-ferrihemoprotein reductase [EC:1.6.2.4] | (RefSeq) NADPH--cytochrome P450 reductase-like (A)	--	hypothetical protein IFM89_014139 [Coptis chinensis]	NDOR1_ARATH RecName: Full=NADPH-dependent diflavin oxidoreductase 1 {ECO:0000255|HAMAP-Rule:MF_03178}; EC=1.18.1.- {ECO:0000255|HAMAP-Rule:MF_03178}; AltName: Full=NADPH-dependent FMN and FAD-containing oxidoreductase {ECO:0000255|HAMAP-Rule:MF_03178};	A0A835HVM0_9MAGN RecName: Full=FAD-binding FR-type domain-containing protein {ECO:0000259|PROSITE:PS51384};	NADP-dependent flavoprotein reductase	GO:0005737,cytoplasm; GO:0005829,cytosol; GO:0005634,nucleus; GO:0050660,flavin adenine dinucleotide binding; GO:0010181,FMN binding; GO:0050661,NADP binding; GO:0003958,NADPH-hemoprotein reductase activity; GO:0016491,oxidoreductase activity; GO:0016651,oxidoreductase activity, acting on NAD(P)H; GO:0009793,embryo development ending in seed dormancy; GO:0016226,iron-sulfur cluster assembly; GO:0…	PF00667.23:FAD binding domain	--	--	--
IFM89_006647	4.5624	8.6703	10.5311	16.0731	18.1241	18.9892	175	359	453	722	1057	720	1.07768	0.000277775	0.00751434	up	CM027377.1	38346213	38350961	+	IFM89_006647	--	K22133 oxalate---CoA ligase [EC:6.2.1.8] | (RefSeq) oxalate--CoA ligase-like (A)	ko00630: Glyoxylate and dicarboxylate metabolism; ko01100: Metabolic pathways	hypothetical protein IFM89_006647 [Coptis chinensis]	CCL9_HUMLU RecName: Full=Probable CoA ligase CCL9 {ECO:0000305|PubMed:23300257}; Short=HlCCL9 {ECO:0000303|PubMed:23300257}; EC=6.2.1.- {ECO:0000305|PubMed:23300257};	A0A835M958_9MAGN SubName: Full=Uncharacterized protein {ECO:0000313|EMBL:KAF9623920.1};	Acyl-CoA synthetase	GO:0005829,cytosol; GO:0005524,ATP binding; GO:0016405,CoA-ligase activity; GO:0000166,nucleotide binding; GO:0003674,molecular_function; GO:0005488,binding; GO:0017076,purine nucleotide binding; GO:0030554,adenyl nucleotide binding; GO:0032553,ribonucleotide binding; GO:0032555,purine ribonucleotide binding; GO:0032559,adenyl ribonucleotide binding; GO:0035639,purine ribonucleoside triphosphate …	PF00501.31:AMP-binding enzyme	--	--	--
IFM89_038214	10.6961	8.7603	16.6754	38.4996	36.0828	17.1624	302	267	528	1273	1549	479	1.25944	0.000284552	0.00763824	up	CM027379.1	1061050	1063643	-	IFM89_038214	--	K20771 carlactone C-19 oxidase [EC:1.14.-.-] | (RefSeq) cytochrome P450 711A1 (A)	--	hypothetical protein IFM89_038214 [Coptis chinensis]	MAX1_ARATH RecName: Full=Cytochrome P450 711A1; EC=1.14.-.-; AltName: Full=Protein MORE AXILLARY BRANCHES 1;	A0A835IIB5_9MAGN SubName: Full=Uncharacterized protein {ECO:0000313|EMBL:KAF9617714.1};	Cytochrome P450 CYP3/CYP5/CYP6/CYP9 subfamilies	GO:0016021,integral component of membrane; GO:0020037,heme binding; GO:0005506,iron ion binding; GO:0004497,monooxygenase activity; GO:0016705,oxidoreductase activity, acting on paired donors, with incorporation or reduction of molecular oxygen; GO:0009926,auxin polar transport; GO:0016117,carotenoid biosynthetic process; GO:0009963,positive regulation of flavonoid biosynthetic process; GO:000993…	PF00067.25:Cytochrome P450	--	--	--
IFM89_024554	27.9023	27.6943	29.3804	86.9754	58.3453	36.7636	658	705	777	2402	2092	857	1.01272	0.000293707	0.00781358	up	CM027378.1	101100074	101101543	+	IFM89_024554	--	K23260 scopoletin glucosyltransferase [EC:2.4.1.128] | (RefSeq) scopoletin glucosyltransferase-like (A)	ko00999: Biosynthesis of various plant secondary metabolites; ko01110: Biosynthesis of secondary metabolites	hypothetical protein IFM89_024554 [Coptis chinensis]	SCGT_TOBAC RecName: Full=Scopoletin glucosyltransferase; EC=2.4.1.128; AltName: Full=Phenylpropanoid:glucosyltransferase 1;	A0A835M6L1_9MAGN RecName: Full=Glycosyltransferase {ECO:0000256|RuleBase:RU362057}; EC=2.4.1.- {ECO:0000256|RuleBase:RU362057};	UDP-glucuronosyl and UDP-glucosyl transferase	GO:0042802,identical protein binding; GO:0050275,scopoletin glucosyltransferase activity; GO:0003674,molecular_function; GO:0005488,binding; GO:0005515,protein binding; GO:0003824,catalytic activity; GO:0008194,UDP-glycosyltransferase activity; GO:0016740,transferase activity; GO:0016757,glycosyltransferase activity; GO:0016758,hexosyltransferase activity; GO:0035251,UDP-glucosyltransferase activ…	PF00201.21:UDP-glucoronosyl and UDP-glucosyl transferase	--	--	--
novel.6607	2.0193	1.8706	4.7716	0.6552	0.9695	1.1848	100	100	265	38	73	58	-1.70871	0.000297157	0.00786524	down	CM027384.1	23413525	23416860	+	--	--	--	--	hypothetical protein IFM89_008306 [Coptis chinensis]	C04C1_PINTA RecName: Full=Cytochrome P450 704C1; EC=1.14.-.-; AltName: Full=Cytochrome P450 CYPD;	A0A835IAV4_9MAGN SubName: Full=Uncharacterized protein {ECO:0000313|EMBL:KAF9613459.1};	Cytochrome P450 CYP4/CYP19/CYP26 subfamilies	GO:0016021,integral component of membrane; GO:0020037,heme binding; GO:0005506,iron ion binding; GO:0004497,monooxygenase activity; GO:0016705,oxidoreductase activity, acting on paired donors, with incorporation or reduction of molecular oxygen; GO:0003674,molecular_function; GO:0005488,binding; GO:0046906,tetrapyrrole binding; GO:0097159,organic cyclic compound binding; GO:1901363,heterocyclic c…	--	--	--	--
IFM89_029071	6.1001	11.8316	11.3889	25.556	23.1945	23.527	32	67	67	157	185	122	1.21317	0.000299129	0.00788948	up	CM027379.1	28735910	28736315	+	IFM89_029071	--	--	--	hypothetical protein IFM89_029071 [Coptis chinensis]	--	A0A835ICA6_9MAGN SubName: Full=Uncharacterized protein {ECO:0000313|EMBL:KAF9616295.1};	--	--	--	--	--	--
IFM89_035004	3.78	3.5452	5.9667	11.6881	6.9642	11.2582	161	163	285	583	451	474	1.08288	0.000306336	0.0080267	up	CM027378.1	29743693	29751639	-	IFM89_035004	--	K02540 DNA replication licensing factor MCM2 [EC:5.6.2.3] | (RefSeq) DNA replication licensing factor MCM2 (A)	ko03030: DNA replication	hypothetical protein IFM89_035004 [Coptis chinensis]	MCM2_ORYSI RecName: Full=DNA replication licensing factor MCM2; EC=3.6.4.12; AltName: Full=Minichromosome maintenance protein 2;	A0A835IT29_9MAGN RecName: Full=DNA replication licensing factor MCM2 {ECO:0000256|ARBA:ARBA00018925}; EC=3.6.4.12 {ECO:0000256|ARBA:ARBA00012551};	DNA replication licensing factor, MCM2 component	GO:0000785,chromatin; GO:0042555,MCM complex; GO:0000347,THO complex; GO:0005524,ATP binding; GO:0016887,ATP hydrolysis activity; GO:0003677,DNA binding; GO:0003678,DNA helicase activity; GO:0046872,metal ion binding; GO:0007049,cell cycle; GO:0006270,DNA replication initiation; GO:0006268,DNA unwinding involved in DNA replication; GO:0009793,embryo development ending in seed dormancy; GO:1905775…	PF00493.26:MCM P-loop domain	--	--	--
IFM89_010578	17.2788	21.2747	24.7693	38.1001	63.5827	41.3763	79	105	127	204	442	187	1.09501	0.000319072	0.00832902	up	CM027378.1	55475856	55476140	-	IFM89_010578	--	--	--	hypothetical protein IFM89_010578 [Coptis chinensis]	NLTP2_PRUAR RecName: Full=Non-specific lipid-transfer protein 2; Short=LTP 2;	A0A835INU3_9MAGN RecName: Full=AAI domain-containing protein {ECO:0000259|Pfam:PF14368};	--	GO:0008289,lipid binding; GO:0006869,lipid transport; GO:0003674,molecular_function; GO:0005488,binding; GO:0006810,transport; GO:0008150,biological_process; GO:0010876,lipid localization; GO:0033036,macromolecule localization; GO:0051179,localization; GO:0051234,establishment of localization; GO:0071702,organic substance transport	PF14368.9:Probable lipid transfer	--	--	--
IFM89_021595	2.1582	2.901	4.2641	12.8282	5.5944	8.6049	51	74	113	355	201	201	1.4452	0.000320166	0.0083367	up	CM027379.1	122083	129375	+	IFM89_021595	--	K09422 transcription factor MYB, plant | (RefSeq) transcription factor MYB1-like isoform X1 (A)	--	hypothetical protein IFM89_021595 [Coptis chinensis]	MYB1_CROXC RecName: Full=Transcription factor MYB1 {ECO:0000305}; AltName: Full=Myb-related protein 1 {ECO:0000303|PubMed:31004005}; Short=CcMYB1 {ECO:0000303|PubMed:31004005};	A0A835M5X3_9MAGN SubName: Full=Uncharacterized protein {ECO:0000313|EMBL:KAF9615024.1};	Transcription factor, Myb superfamily	GO:0005634,nucleus; GO:0003677,DNA binding; GO:0003674,molecular_function; GO:0003676,nucleic acid binding; GO:0005488,binding; GO:0097159,organic cyclic compound binding; GO:1901363,heterocyclic compound binding; GO:0005575,cellular_component; GO:0005622,intracellular anatomical structure; GO:0043226,organelle; GO:0043227,membrane-bounded organelle; GO:0043229,intracellular organelle; GO:0043231…	PF00249.34:Myb-like DNA-binding domain	MYB	TF	MYB->MYB
IFM89_038068	0.4764	0.7638	0.6699	2.3469	1.6269	1.3346	26	45	41	150	135	72	1.3869	0.000323057	0.0083806	up	CM027385.1	16037902	16041418	+	IFM89_038068	--	K00924 kinase [EC:2.7.1.-] | (RefSeq) receptor protein kinase CLAVATA1 (A)	--	hypothetical protein IFM89_038068 [Coptis chinensis]	RGI4_ARATH RecName: Full=Leucine-rich repeat receptor-like serine/threonine-protein kinase RGI4 {ECO:0000305|PubMed:27229312}; EC=2.7.11.1 {ECO:0000255|PROSITE-ProRule:PRU00159}; AltName: Full=Protein RECEPTOR OF RGF1 2 {ECO:0000303|PubMed:27229311}; AltName: Full=Protein RGF1 INSENSITIVE 4 {ECO:0000303|PubMed:27229312}; AltName: Full=Protein STERILITY-REGULATING KINASE MEMBER 2 {ECO:0000303|PubM…	A0A835LDN8_9MAGN RecName: Full=Protein kinase domain-containing protein {ECO:0000259|PROSITE:PS50011};	--	GO:0016021,integral component of membrane; GO:0005886,plasma membrane; GO:0005524,ATP binding; GO:0042802,identical protein binding; GO:0042277,peptide binding; GO:0001653,peptide receptor activity; GO:0004674,protein serine/threonine kinase activity; GO:0010074,maintenance of meristem identity; GO:0006468,protein phosphorylation; GO:0080092,regulation of pollen tube growth; GO:0010082,regulation…	PF13855.9:Leucine rich repeat	--	--	--
IFM89_024760	1.7273	1.9296	3.1258	4.4682	8.0526	6.6298	34	41	69	103	241	129	1.41483	0.000328222	0.00846197	up	CM027385.1	24206866	24208931	-	IFM89_024760	--	K01052 lysosomal acid lipase/cholesteryl ester hydrolase [EC:3.1.1.13] | (RefSeq) triacylglycerol lipase 2-like (A)	ko00100: Steroid biosynthesis	hypothetical protein IFM89_024760 [Coptis chinensis]	LIP2_ARATH RecName: Full=Triacylglycerol lipase 2; EC=3.1.1.3; Flags: Precursor;	A0A835GZ70_9MAGN RecName: Full=Lipase {ECO:0000256|PIRNR:PIRNR000862};	Triglyceride lipase-cholesterol esterase	GO:0005576,extracellular region; GO:0016298,lipase activity; GO:0004806,triglyceride lipase activity; GO:0002213,defense response to insect; GO:0016042,lipid catabolic process; GO:0003674,molecular_function; GO:0003824,catalytic activity; GO:0016787,hydrolase activity; GO:0016788,hydrolase activity, acting on ester bonds; GO:0052689,carboxylic ester hydrolase activity; GO:0006950,response to stre…	PF04083.19:Partial alpha/beta-hydrolase lipase region	--	--	--
IFM89_034005	2.5306	2.1018	4.0203	7.824	6.1219	5.8558	87	78	155	315	320	199	1.10818	0.000338902	0.00871575	up	CM027378.1	104494358	104498329	+	IFM89_034005	--	K09487 heat shock protein 90kDa beta | (RefSeq) endoplasmin homolog isoform X1 (A)	ko04141: Protein processing in endoplasmic reticulum; ko04626: Plant-pathogen interaction	hypothetical protein IFM89_034005 [Coptis chinensis]	NFD4_ARATH RecName: Full=Protein NUCLEAR FUSION DEFECTIVE 4 {ECO:0000303|PubMed:16698901};	A0A835IS02_9MAGN RecName: Full=Nodulin-like domain-containing protein {ECO:0000259|Pfam:PF06813};	--	GO:0016021,integral component of membrane; GO:0016020,membrane; GO:0005739,mitochondrion; GO:0000741,karyogamy; GO:0010197,polar nucleus fusion; GO:0009651,response to salt stress; GO:0006996,organelle organization; GO:0006997,nucleus organization; GO:0008150,biological_process; GO:0009987,cellular process; GO:0016043,cellular component organization; GO:0048284,organelle fusion; GO:0071840,cellul…	PF06813.16:Nodulin-like	--	--	--
novel.8001	2.5083	4.2518	3.2361	0.9114	1.2285	1.5117	47	86	68	20	35	28	-1.54191	0.000341849	0.00875913	down	CM027385.1	83279581	83283974	-	--	--	--	--	hypothetical protein IFM89_025828 [Coptis chinensis]	--	A0A835HFF3_9MAGN RecName: Full=PGG domain-containing protein {ECO:0000259|Pfam:PF13962};	--	GO:0016020,membrane; GO:0005575,cellular_component; GO:0110165,cellular anatomical entity	--	--	--	--
IFM89_005973	5.3087	3.2786	5.0902	9.8462	8.4474	12.6467	93	62	100	202	225	219	1.0922	0.000343467	0.00877904	up	CM027383.1	13455606	13456697	+	IFM89_005973	--	K00850 6-phosphofructokinase 1 [EC:2.7.1.11] | (RefSeq) ATP-dependent 6-phosphofructokinase 6-like (A)	ko00010: Glycolysis / Gluconeogenesis; ko00030: Pentose phosphate pathway; ko00051: Fructose and mannose metabolism; ko00052: Galactose metabolism; ko01100: Metabolic pathways; ko01110: Biosynthesis of secondary metabolites; ko01200: Carbon metabolism; ko01230: Biosynthesis of amino acids; ko03018: RNA degradation	hypothetical protein IFM89_005973 [Coptis chinensis]	PUP3_ARATH RecName: Full=Purine permease 3; Short=AtPUP3;	A0A835HBC8_9MAGN RecName: Full=Probable purine permease {ECO:0000256|RuleBase:RU368015};	--	GO:0016021,integral component of membrane; GO:0016020,membrane; GO:0005345,purine nucleobase transmembrane transporter activity; GO:0015211,purine nucleoside transmembrane transporter activity; GO:0006863,purine nucleobase transport; GO:0003674,molecular_function; GO:0005215,transporter activity; GO:0015205,nucleobase transmembrane transporter activity; GO:0022857,transmembrane transporter activi…	PF16913.8:Purine nucleobase transmembrane transport	--	--	--
IFM89_005233	1.496	1.3859	1.4823	4.2582	4.4551	2.6065	36	36	40	120	163	62	1.29586	0.000344854	0.00880339	up	CM027384.1	92379203	92381086	+	IFM89_005233	--	K01757 strictosidine synthase [EC:4.3.3.2] | (RefSeq) protein STRICTOSIDINE SYNTHASE-LIKE 12-like (A)	ko00901: Indole alkaloid biosynthesis; ko01100: Metabolic pathways; ko01110: Biosynthesis of secondary metabolites	hypothetical protein IFM89_005233 [Coptis chinensis]	SSL10_ARATH RecName: Full=Protein STRICTOSIDINE SYNTHASE-LIKE 10 {ECO:0000303|PubMed:10777701}; Short=AtSSL10 {ECO:0000303|PubMed:10777701}; AltName: Full=Strictosidine synthase 8; Short=AtSS8; Flags: Precursor;	A0A835LGJ1_9MAGN RecName: Full=Str_synth domain-containing protein {ECO:0000259|Pfam:PF03088};	Predicted alkaloid synthase/Surface mucin Hemomucin	GO:0005829,cytosol; GO:0005783,endoplasmic reticulum; GO:0009505,plant-type cell wall; GO:0005886,plasma membrane; GO:0009506,plasmodesma; GO:0005773,vacuole; GO:0009058,biosynthetic process; GO:0008150,biological_process; GO:0008152,metabolic process; GO:0005575,cellular_component; GO:0005622,intracellular anatomical structure; GO:0005737,cytoplasm; GO:0110165,cellular anatomical entity; GO:0012…	PF03088.19:Strictosidine synthase	--	--	--
IFM89_020994	2.4895	2.0349	3.6128	6.6691	5.7789	6.3208	51	45	83	160	180	128	1.11876	0.000348538	0.00886519	up	CM027384.1	88475827	88479069	+	IFM89_020994	--	--	--	hypothetical protein IFM89_020994 [Coptis chinensis]	--	A0A835H7Y4_9MAGN SubName: Full=Uncharacterized protein {ECO:0000313|EMBL:KAF9593238.1};	--	--	PF14226.9:non-haem dioxygenase in morphine synthesis N-terminal	--	--	--
IFM89_024850	0.4162	0	0.0825	0.6318	1.4903	7.9995	9	0	2	16	49	171	4.27936	0.000373599	0.00936558	up	CM027382.1	92989780	92995350	-	IFM89_024850	--	K14299 nucleoporin SEH1 | (RefSeq) protein SEH1-like (A)	ko03013: Nucleocytoplasmic transport	hypothetical protein IFM89_024850 [Coptis chinensis]	SEH1_ARATH RecName: Full=Protein SEH1 {ECO:0000303|PubMed:21189294};	A0A835HRY6_9MAGN SubName: Full=Uncharacterized protein {ECO:0000313|EMBL:KAF9602083.1};	Nuclear pore complex component (sc Seh1)	GO:0005737,cytoplasm; GO:0005635,nuclear envelope; GO:0031080,nuclear pore outer ring; GO:0035859,Seh1-associated complex; GO:0005198,structural molecule activity; GO:0034198,cellular response to amino acid starvation; GO:0051028,mRNA transport; GO:1904263,positive regulation of TORC1 signaling; GO:0015031,protein transport; GO:0003674,molecular_function; GO:0006950,response to stress; GO:0007154…	PF00400.35:WD domain, G-beta repeat	--	--	--
IFM89_027332	15.7581	19.7652	15.4194	9.169	9.8138	5.9251	113	153	124	77	107	42	-1.10827	0.000383001	0.00950983	down	CM027383.1	87616359	87617782	-	IFM89_027332	--	K00894 ethanolamine kinase [EC:2.7.1.82] | (RefSeq) probable ethanolamine kinase (A)	ko00564: Glycerophospholipid metabolism; ko01100: Metabolic pathways	hypothetical protein IFM89_027332 [Coptis chinensis]	EKI_ARATH RecName: Full=Probable ethanolamine kinase; EC=2.7.1.82; AltName: Full=Protein EMBRYO DEFECTIVE 1187;	A0A835HFR9_9MAGN SubName: Full=Uncharacterized protein {ECO:0000313|EMBL:KAF9598380.1};	Ethanolamine kinase	GO:0005737,cytoplasm; GO:0005886,plasma membrane; GO:0005524,ATP binding; GO:0004305,ethanolamine kinase activity; GO:0006646,phosphatidylethanolamine biosynthetic process; GO:0008654,phospholipid biosynthetic process; GO:0016310,phosphorylation; GO:0000166,nucleotide binding; GO:0003674,molecular_function; GO:0005488,binding; GO:0017076,purine nucleotide binding; GO:0030554,adenyl nucleotide bin…	PF01633.23:Choline/ethanolamine kinase	--	--	--
novel.7993	8.5814	2.5512	4.8108	2.4158	2.2502	1.4358	913	293	574	301	364	151	-1.46816	0.000385869	0.00956964	down	CM027385.1	82721423	82732046	-	--	--	K09338 homeobox-leucine zipper protein | (RefSeq) homeobox-leucine zipper protein ATHB-14 isoform X1 (A)	--	hypothetical protein IFM89_004342 [Coptis chinensis]	HOX9_ORYSI RecName: Full=Homeobox-leucine zipper protein HOX9; AltName: Full=HD-ZIP protein HOX9; AltName: Full=Homeodomain transcription factor HOX9; AltName: Full=OsHB2; AltName: Full=OsHox9;	A0A835M6X0_9MAGN SubName: Full=Uncharacterized protein {ECO:0000313|EMBL:KAF9612926.1};	--	GO:0005634,nucleus; GO:0003677,DNA binding; GO:0003700,DNA-binding transcription factor activity; GO:0008289,lipid binding; GO:0003674,molecular_function; GO:0003676,nucleic acid binding; GO:0005488,binding; GO:0097159,organic cyclic compound binding; GO:1901363,heterocyclic compound binding; GO:0140110,transcription regulator activity; GO:0005575,cellular_component; GO:0005622,intracellular anat…	--	--	--	--
IFM89_000197	1.2185	0.7723	0.3431	5.7773	1.2021	6.2282	38	26	12	211	57	192	2.41544	0.000395719	0.00976746	up	CM027379.1	34592966	34610797	-	IFM89_000197	--	K08869 aarF domain-containing kinase | (RefSeq) uncharacterized protein LOC122076742 (A)	--	hypothetical protein IFM89_000197 [Coptis chinensis]	AB1K8_ARATH RecName: Full=Protein ACTIVITY OF BC1 COMPLEX KINASE 8, chloroplastic {ECO:0000303|PubMed:22694836}; Short=ABC1-LIKE KINASE 8 {ECO:0000303|PubMed:22694836}; EC=2.7.11.1 {ECO:0000250|UniProtKB:Q9MA15}; AltName: Full=ABC2 homolog protein 13 {ECO:0000303|PubMed:11346655}; Short=AtATH13 {ECO:0000303|PubMed:11346655}; AltName: Full=Oxidative stress-related ABC1-like protein 1, chloroplasti…	A0A835I8C4_9MAGN SubName: Full=Uncharacterized protein {ECO:0000313|EMBL:KAF9612449.1};	Predicted unusual protein kinase	GO:0009507,chloroplast; GO:0009941,chloroplast envelope; GO:0031969,chloroplast membrane; GO:0016021,integral component of membrane; GO:0009536,plastid; GO:0005524,ATP binding; GO:0004672,protein kinase activity; GO:0106310,protein serine kinase activity; GO:0004674,protein serine/threonine kinase activity; GO:0034599,cellular response to oxidative stress; GO:0007623,circadian rhythm; GO:0055072,…	PF03109.19:ABC1 atypical kinase-like domain	--	--	--
IFM89_021429	2.2844	2.5394	1.5787	6.6809	3.8688	4.6797	80	96	62	274	206	162	1.16354	0.000400798	0.00984457	up	CM027380.1	2261441	2274132	+	IFM89_021429	--	K00128 aldehyde dehydrogenase (NAD+) [EC:1.2.1.3] | (RefSeq) aldehyde dehydrogenase family 3 member H1-like (A)	ko00010: Glycolysis / Gluconeogenesis; ko00053: Ascorbate and aldarate metabolism; ko00071: Fatty acid degradation; ko00280: Valine, leucine and isoleucine degradation; ko00310: Lysine degradation; ko00330: Arginine and proline metabolism; ko00340: Histidine metabolism; ko00380: Tryptophan metabolism; ko00410: beta-Alanine metabolism; ko00561: Glycerolipid metabolism; ko00620: Pyruvate metabolism…	hypothetical protein IFM89_021429 [Coptis chinensis]	AL3I1_ARATH RecName: Full=Aldehyde dehydrogenase family 3 member I1, chloroplastic; Short=AtALDH3; Short=Ath-ALDH3; EC=1.2.1.3; Flags: Precursor;	A0A835I428_9MAGN SubName: Full=Uncharacterized protein {ECO:0000313|EMBL:KAF9610236.1};	Aldehyde dehydrogenase	GO:0009507,chloroplast; GO:0009941,chloroplast envelope; GO:0005737,cytoplasm; GO:0005886,plasma membrane; GO:0009536,plastid; GO:0004028,3-chloroallyl aldehyde dehydrogenase activity; GO:0004029,aldehyde dehydrogenase (NAD+) activity; GO:0033721,aldehyde dehydrogenase (NADP+) activity; GO:0043878,glyceraldehyde-3-phosphate dehydrogenase (NAD+) (non-phosphorylating) activity; GO:0006081,cellular …	PF00171.25:Aldehyde dehydrogenase family	--	--	--
IFM89_008001	19.8542	19.4694	13.318	6.1858	3.3528	10.2235	222	235	167	81	57	113	-1.50601	0.000401203	0.00984457	down	CM027378.1	112525431	112526759	-	IFM89_008001	--	--	--	hypothetical protein IFM89_008001 [Coptis chinensis]	Y2309_ARATH RecName: Full=Uncharacterized protein At2g23090;	A0A835IKT5_9MAGN SubName: Full=Uncharacterized protein {ECO:0000313|EMBL:KAF9619680.1};	--	--	PF12907.10:Zinc-binding	--	--	--
IFM89_017168	12.1264	24.108	31.2246	92.9019	37.9062	57.8912	178	382	514	1597	846	840	1.3953	0.000401687	0.00984488	up	CM027381.1	56150603	56151743	+	IFM89_017168	--	K10781 fatty acyl-ACP thioesterase B [EC:3.1.2.14 3.1.2.21] | (RefSeq) uncharacterized protein LOC113347984 isoform X1 (A)	ko00061: Fatty acid biosynthesis; ko01100: Metabolic pathways; ko01212: Fatty acid metabolism	hypothetical protein IFM89_017168 [Coptis chinensis]	ML423_ARATH RecName: Full=MLP-like protein 423;	A0A835HU74_9MAGN RecName: Full=Bet_v_1 domain-containing protein {ECO:0000259|SMART:SM01037};	--	GO:0005829,cytosol; GO:0005634,nucleus; GO:0010427,abscisic acid binding; GO:0004864,protein phosphatase inhibitor activity; GO:0038023,signaling receptor activity; GO:0009738,abscisic acid-activated signaling pathway; GO:0006952,defense response; GO:0003674,molecular_function; GO:0005488,binding; GO:0008289,lipid binding; GO:0019840,isoprenoid binding; GO:0031406,carboxylic acid binding; GO:0033…	PF00407.22:Pathogenesis-related protein Bet v 1 family	--	--	--
IFM89_038472	4.2326	6.518	6.3231	16.0999	10.1229	11.1773	77	128	129	343	280	201	1.04265	0.000428044	0.010345	up	CM027384.1	8983379	8984512	+	IFM89_038472	--	K22683 aspartyl protease family protein [EC:3.4.23.-] | (RefSeq) aspartyl protease family protein 2 (A)	--	hypothetical protein IFM89_038472 [Coptis chinensis]	NEP2_NEPGR RecName: Full=Aspartic proteinase nepenthesin-2; EC=3.4.23.12; AltName: Full=Nepenthesin-II; Flags: Precursor;	A0A835HAB0_9MAGN RecName: Full=Peptidase A1 domain-containing protein {ECO:0000259|PROSITE:PS51767};	Aspartyl protease	GO:0005576,extracellular region; GO:0004190,aspartic-type endopeptidase activity; GO:0006508,proteolysis; GO:0003674,molecular_function; GO:0003824,catalytic activity; GO:0004175,endopeptidase activity; GO:0008233,peptidase activity; GO:0016787,hydrolase activity; GO:0070001,aspartic-type peptidase activity; GO:0140096,catalytic activity, acting on a protein; GO:0006807,nitrogen compound metaboli…	PF14543.9:Xylanase inhibitor N-terminal	--	--	--
IFM89_017893	0.1658	0.5631	1.0841	4.6716	2.0717	3.6338	3	11	22	99	57	65	2.41883	0.000433456	0.0104395	up	CM027380.1	43659752	43661998	+	IFM89_017893	--	K00679 phospholipid:diacylglycerol acyltransferase [EC:2.3.1.158] | (RefSeq) hypothetical protein (A)	ko00561: Glycerolipid metabolism; ko01100: Metabolic pathways	hypothetical protein IFM89_017893 [Coptis chinensis]	GDL66_ARATH RecName: Full=GDSL esterase/lipase At4g26790; EC=3.1.1.-; AltName: Full=Extracellular lipase At4g26790; Flags: Precursor;	A0A835I361_9MAGN SubName: Full=Uncharacterized protein {ECO:0000313|EMBL:KAF9609694.1};	--	GO:0005576,extracellular region; GO:0016788,hydrolase activity, acting on ester bonds; GO:0016042,lipid catabolic process; GO:0003674,molecular_function; GO:0003824,catalytic activity; GO:0016787,hydrolase activity; GO:0006629,lipid metabolic process; GO:0008150,biological_process; GO:0008152,metabolic process; GO:0009056,catabolic process; GO:0044238,primary metabolic process; GO:0071704,organic…	PF00657.25:GDSL-like Lipase/Acylhydrolase	--	--	--
IFM89_014907	4.7098	6.8439	8.8935	21.5278	28.4252	10.7436	51	80	108	273	468	115	1.48651	0.00043644	0.0104751	up	CM027384.1	395665	396434	-	IFM89_014907	--	K07375 tubulin beta | (RefSeq) tubulin beta-3 chain-like (A)	ko04145: Phagosome	hypothetical protein IFM89_014907 [Coptis chinensis]	TBB1_WHEAT RecName: Full=Tubulin beta-1 chain; AltName: Full=Beta-1-tubulin;	A0A835LH88_9MAGN RecName: Full=Tubulin beta chain {ECO:0000256|RuleBase:RU000352};	Beta tubulin	GO:0005737,cytoplasm; GO:0005874,microtubule; GO:0005525,GTP binding; GO:0005200,structural constituent of cytoskeleton; GO:0000226,microtubule cytoskeleton organization; GO:0007017,microtubule-based process; GO:0000278,mitotic cell cycle; GO:0000166,nucleotide binding; GO:0003674,molecular_function; GO:0005488,binding; GO:0017076,purine nucleotide binding; GO:0019001,guanyl nucleotide binding; G…	PF00091.28:Tubulin/FtsZ family, GTPase domain	--	--	--
IFM89_019603	1.8267	2.1998	1.8325	3.9775	5.0759	4.0192	40	52	45	102	169	87	1.07772	0.000445049	0.0106309	up	CM027379.1	100090707	100092071	-	IFM89_019603	--	K01513 ectonucleotide pyrophosphatase/phosphodiesterase family member 1/3 [EC:3.1.4.1 3.6.1.9] | (RefSeq) ectonucleotide pyrophosphatase/phosphodiesterase family member 3 (A)	ko00230: Purine metabolism; ko00240: Pyrimidine metabolism; ko00500: Starch and sucrose metabolism; ko00740: Riboflavin metabolism; ko00760: Nicotinate and nicotinamide metabolism; ko00770: Pantothenate and CoA biosynthesis; ko01100: Metabolic pathways; ko01110: Biosynthesis of secondary metabolites; ko01232: Nucleotide metabolism	hypothetical protein IFM89_019603 [Coptis chinensis]	--	A0A835IB75_9MAGN SubName: Full=Uncharacterized protein {ECO:0000313|EMBL:KAF9614626.1};	Type I phosphodiesterase/nucleotide pyrophosphatase	--	PF01663.25:Type I phosphodiesterase / nucleotide pyrophosphatase	--	--	--
IFM89_015857	33.2857	37.7495	28.6018	8.2684	5.0418	19.1833	165	202	159	48	38	94	-1.71085	0.000445479	0.0106309	down	CM027378.1	66869340	66869648	-	IFM89_015857	--	K03676 glutaredoxin 3 | (RefSeq) putative glutaredoxin-C14 (A)	--	hypothetical protein IFM89_015857 [Coptis chinensis]	GRXC1_ORYSJ RecName: Full=Glutaredoxin-C1;	A0A835IL87_9MAGN RecName: Full=Glutaredoxin domain-containing protein {ECO:0000259|Pfam:PF00462};	Glutaredoxin and related proteins	GO:0005737,cytoplasm; GO:0097573,glutathione oxidoreductase activity; GO:0003674,molecular_function; GO:0003824,catalytic activity; GO:0015035,protein-disulfide reductase activity; GO:0015036,disulfide oxidoreductase activity; GO:0016491,oxidoreductase activity; GO:0016667,oxidoreductase activity, acting on a sulfur group of donors; GO:0140096,catalytic activity, acting on a protein; GO:0005575,c…	PF00462.27:Glutaredoxin	--	--	--
IFM89_017706	41.7547	47.8377	60.5457	176.704	160.155	54.8087	773	956	1257	3831	4508	1003	1.29712	0.000446308	0.0106384	up	CM027380.1	26600171	26603455	+	IFM89_017706	--	K23050 phenylcoumaran benzylic ether reductase [EC:1.3.1.-] | (RefSeq) IFRL5; isoflavone reductase-like protein 5 (A)	--	hypothetical protein IFM89_017706 [Coptis chinensis]	PYRC5_PYRCO RecName: Full=Phenylcoumaran benzylic ether reductase Pyrc5 {ECO:0000305}; EC=1.23.1.- {ECO:0000269|PubMed:11606193}; AltName: Full=Minor fruit allergen Pyr c 5 {ECO:0000303|PubMed:11606193}; AltName: Allergen=Pyr c 5 {ECO:0000303|PubMed:11606193};	A0A835M3Q3_9MAGN RecName: Full=NmrA domain-containing protein {ECO:0000259|Pfam:PF05368};	--	GO:0032442,phenylcoumaran benzylic ether reductase activity; GO:0009807,lignan biosynthetic process; GO:0003674,molecular_function; GO:0003824,catalytic activity; GO:0016491,oxidoreductase activity; GO:0016614,oxidoreductase activity, acting on CH-OH group of donors; GO:0016616,oxidoreductase activity, acting on the CH-OH group of donors, NAD or NADP as acceptor; GO:0006725,cellular aromatic comp…	PF05368.16:NmrA-like family	--	--	--
IFM89_027588	17.8337	22.6295	15.2737	9.7744	6.2738	12.7547	430	589	413	276	230	304	-1.04082	0.000455327	0.0107744	down	CM027378.1	106865797	106867299	+	IFM89_027588	--	K13496 UDP-glucosyltransferase 73C [EC:2.4.1.-] | (RefSeq) UDP-glycosyltransferase 73E1 (A)	ko00908: Zeatin biosynthesis; ko01110: Biosynthesis of secondary metabolites	hypothetical protein IFM89_027588 [Coptis chinensis]	U92A1_ARATH RecName: Full=UDP-glycosyltransferase 92A1; EC=2.4.1.-;	A0A835IQW0_9MAGN RecName: Full=Glycosyltransferase {ECO:0000256|RuleBase:RU362057}; EC=2.4.1.- {ECO:0000256|RuleBase:RU362057};	UDP-glucuronosyl and UDP-glucosyl transferase	GO:0008194,UDP-glycosyltransferase activity; GO:0003674,molecular_function; GO:0003824,catalytic activity; GO:0016740,transferase activity; GO:0016757,glycosyltransferase activity	PF00201.21:UDP-glucoronosyl and UDP-glucosyl transferase	--	--	--
IFM89_028493	14.4176	5.8138	2.9494	1.7381	2.1196	1.6301	170	74	39	24	38	19	-2.15592	0.000473058	0.0110488	down	CM027382.1	96277072	96282102	+	IFM89_028493	--	no KO assigned | (RefSeq) probable S-adenosyl-L-methionine-dependent RNA methyltransferase RSM22, mitochondrial (A)	--	hypothetical protein IFM89_028493 [Coptis chinensis]	TBB3_GOSHI RecName: Full=Tubulin beta-3 chain; AltName: Full=Beta-3-tubulin;	A0A835HQ10_9MAGN SubName: Full=Uncharacterized protein {ECO:0000313|EMBL:KAF9602479.1};	Mitochondrial/chloroplast ribosome small subunit component	GO:0005737,cytoplasm; GO:0005874,microtubule; GO:0005525,GTP binding; GO:0005200,structural constituent of cytoskeleton; GO:0000226,microtubule cytoskeleton organization; GO:0007017,microtubule-based process; GO:0000278,mitotic cell cycle; GO:0009741,response to brassinosteroid; GO:0090378,seed trichome elongation; GO:0000166,nucleotide binding; GO:0003674,molecular_function; GO:0005488,binding; …	PF09243.13:Mitochondrial small ribosomal subunit Rsm22	--	--	--
IFM89_003477	93.2013	100.706	81.4972	302.14	146.464	144.246	619	722	607	2350	1479	947	1.0181	0.000480543	0.0111985	up	CM027383.1	95320169	95320883	+	IFM89_003477	--	--	--	hypothetical protein IFM89_003477 [Coptis chinensis]	NLTP_LACSA RecName: Full=Non-specific lipid-transfer protein Lac s 1 {ECO:0000303|PubMed:12757453, ECO:0000303|PubMed:17349693}; Short=nsLTP Lac s 1 {ECO:0000303|PubMed:12757453, ECO:0000303|PubMed:17349693}; AltName: Allergen=Lac s 1 {ECO:0000303|PubMed:12757453, ECO:0000303|PubMed:17349693}; Flags: Precursor;	A0A835LI73_9MAGN RecName: Full=Non-specific lipid-transfer protein {ECO:0000256|RuleBase:RU000628};	--	GO:0008289,lipid binding; GO:0006869,lipid transport; GO:0003674,molecular_function; GO:0005488,binding; GO:0006810,transport; GO:0008150,biological_process; GO:0010876,lipid localization; GO:0033036,macromolecule localization; GO:0051179,localization; GO:0051234,establishment of localization; GO:0071702,organic substance transport	PF00234.25:Protease inhibitor/seed storage/LTP family	--	--	--
novel.6547	57.3322	92.504	64.8635	224.874	144.381	101.827	573	998	727	2632	2194	1006	1.04604	0.000486139	0.0112911	up	CM027384.1	16601628	16602662	+	--	--	--	--	--	--	A0A835IZ26_9MAGN SubName: Full=Uncharacterized protein {ECO:0000313|EMBL:KAF9624178.1}; Flags: Fragment;	--	--	--	--	--	--
IFM89_022394	1.5073	1.0473	1.1761	2.896	2.6437	2.8274	48	36	42	108	128	89	1.08303	0.000488073	0.0113234	up	CM027377.1	18548044	18551528	-	IFM89_022394	--	K21867 potassium channel | (RefSeq) potassium channel AKT1-like (A)	--	hypothetical protein IFM89_022394 [Coptis chinensis]	--	A0A835IXV9_9MAGN SubName: Full=Uncharacterized protein {ECO:0000313|EMBL:KAF9625409.1};	--	--	PF01011.24:PQQ enzyme repeat	--	--	--
IFM89_003157	31.7531	25.9794	49.1442	111.346	78.2726	52.9889	488	431	847	2004	1829	805	1.09648	0.00049245	0.0113996	up	CM027379.1	16561816	16564094	+	IFM89_003157	--	K11968 ariadne-1 [EC:2.3.2.31] | (RefSeq) probable E3 ubiquitin-protein ligase ARI2 isoform X1 (A)	--	hypothetical protein IFM89_003157 [Coptis chinensis]	HBL2_SOLLC RecName: Full=Non-symbiotic hemoglobin 2; AltName: Full=Hb2; AltName: Full=SOLly GLB2;	A0A835M199_9MAGN RecName: Full=GLOBIN domain-containing protein {ECO:0000259|PROSITE:PS01033};	Globins and related hemoproteins	GO:0020037,heme binding; GO:0046872,metal ion binding; GO:0019825,oxygen binding; GO:0006631,fatty acid metabolic process; GO:0019432,triglyceride biosynthetic process; GO:0003674,molecular_function; GO:0005488,binding; GO:0046906,tetrapyrrole binding; GO:0097159,organic cyclic compound binding; GO:1901363,heterocyclic compound binding; GO:0043167,ion binding; GO:0043169,cation binding; GO:003609…	PF00042.25:Globin	--	--	--
IFM89_015947	10.9583	21.9948	24.3581	89.6402	37.9687	36.5508	138	299	344	1322	727	455	1.42844	0.000540647	0.0122702	up	CM027383.1	77381875	77382826	+	IFM89_015947	--	--	--	hypothetical protein IFM89_015947 [Coptis chinensis]	Y5258_ARATH RecName: Full=Stress-response A/B barrel domain-containing protein At5g22580 {ECO:0000305}; AltName: Full=Uncharacterized protein At5g22580;	A0A835HHT2_9MAGN RecName: Full=Stress-response A/B barrel domain-containing protein {ECO:0000259|PROSITE:PS51502};	--	GO:0009507,chloroplast; GO:0005829,cytosol; GO:0009536,plastid; GO:0046872,metal ion binding; GO:0003674,molecular_function; GO:0005488,binding; GO:0043167,ion binding; GO:0043169,cation binding; GO:0005575,cellular_component; GO:0005622,intracellular anatomical structure; GO:0005737,cytoplasm; GO:0043226,organelle; GO:0043227,membrane-bounded organelle; GO:0043229,intracellular organelle; GO:004…	PF07876.15:Stress responsive A/B Barrel Domain	--	--	--
IFM89_023538	3.4583	5.9043	6.7028	15.0581	10.2448	9.9462	121	223	263	617	545	344	1.04607	0.000542933	0.0123086	up	CM027379.1	21811056	21813774	-	IFM89_023538	--	K20887 xyloglucan glycosyltransferase 4 [EC:2.4.1.-] | (RefSeq) xyloglucan glycosyltransferase 4 (A)	--	hypothetical protein IFM89_023538 [Coptis chinensis]	CSLC5_ARATH RecName: Full=Probable xyloglucan glycosyltransferase 5 {ECO:0000303|PubMed:11027699}; EC=2.4.1.- {ECO:0000250|UniProtKB:Q9LJP4}; AltName: Full=Cellulose synthase-like protein C5 {ECO:0000303|PubMed:11027699}; Short=AtCslC5 {ECO:0000303|PubMed:11027699};	A0A835IFG2_9MAGN RecName: Full=Glyco_trans_2-like domain-containing protein {ECO:0000259|Pfam:PF13632};	--	GO:0005794,Golgi apparatus; GO:0000139,Golgi membrane; GO:0016021,integral component of membrane; GO:0016757,glycosyltransferase activity; GO:0042803,protein homodimerization activity; GO:0071555,cell wall organization; GO:0099402,plant organ development; GO:0048868,pollen tube development; GO:0003674,molecular_function; GO:0003824,catalytic activity; GO:0016740,transferase activity; GO:0005488,b…	PF13632.9:Glycosyl transferase family group 2	--	--	--
IFM89_001246	10.9984	10.2491	18.276	38.4859	31.0382	19.1161	337	339	628	1381	1446	579	1.0796	0.000549899	0.0123992	up	CM027384.1	20243668	20246473	-	IFM89_001246	--	K00430 peroxidase [EC:1.11.1.7] | (RefSeq) peroxidase P7-like (A)	ko00940: Phenylpropanoid biosynthesis; ko01100: Metabolic pathways; ko01110: Biosynthesis of secondary metabolites	hypothetical protein IFM89_001246 [Coptis chinensis]	PER4_VITVI RecName: Full=Peroxidase 4 {ECO:0000250|UniProtKB:Q42578}; EC=1.11.1.7; Flags: Precursor;	A0A835H1U0_9MAGN RecName: Full=Peroxidase {ECO:0000256|RuleBase:RU362060}; EC=1.11.1.7 {ECO:0000256|RuleBase:RU362060};	--	GO:0005576,extracellular region; GO:0020037,heme binding; GO:0046872,metal ion binding; GO:0004601,peroxidase activity; GO:0042744,hydrogen peroxide catabolic process; GO:0006979,response to oxidative stress; GO:0003674,molecular_function; GO:0005488,binding; GO:0046906,tetrapyrrole binding; GO:0097159,organic cyclic compound binding; GO:1901363,heterocyclic compound binding; GO:0043167,ion bindi…	PF00141.26:Peroxidase	--	--	--
IFM89_021689	11.8245	10.0042	21.6365	6.7702	3.2816	6.9145	173	158	355	116	73	100	-1.44796	0.000560691	0.0125476	down	CM027379.1	772492	777486	-	IFM89_021689	--	K16365 small glutamine-rich tetratricopeptide repeat-containing protein alpha | (RefSeq) hsp70-Hsp90 organizing protein 3 (A)	--	hypothetical protein IFM89_021689 [Coptis chinensis]	HSOP2_ARATH RecName: Full=Hsp70-Hsp90 organizing protein 2; Short=AtHop2;	A0A835IG46_9MAGN SubName: Full=Uncharacterized protein {ECO:0000313|EMBL:KAF9615118.1};	TPR repeat-containing protein	GO:0005829,cytosol; GO:0005634,nucleus; GO:0030544,Hsp70 protein binding; GO:0051879,Hsp90 protein binding; GO:0070678,preprotein binding; GO:0051131,chaperone-mediated protein complex assembly; GO:0006457,protein folding; GO:0046686,response to cadmium ion; GO:0003674,molecular_function; GO:0005488,binding; GO:0005515,protein binding; GO:0031072,heat shock protein binding; GO:0008150,biological_…	PF00515.31:Tetratricopeptide repeat	--	--	--
novel.3923	3.0084	2.1576	3.8364	0.4696	1.5106	0.5236	93	72	133	17	71	16	-1.90934	0.00056394	0.0125932	down	CM027380.1	107803824	107806196	-	--	--	K00002 alcohol dehydrogenase (NADP+) [EC:1.1.1.2] | (RefSeq) NADPH-dependent aldo-keto reductase, chloroplastic-like (A)	ko00010: Glycolysis / Gluconeogenesis; ko00040: Pentose and glucuronate interconversions; ko00053: Ascorbate and aldarate metabolism; ko00561: Glycerolipid metabolism; ko00620: Pyruvate metabolism; ko01100: Metabolic pathways; ko01110: Biosynthesis of secondary metabolites; ko01240: Biosynthesis of cofactors	hypothetical protein IFM89_003163 [Coptis chinensis]	AKRCA_ARATH RecName: Full=Aldo-keto reductase family 4 member C10; EC=1.1.1.-;	A0A835IB86_9MAGN SubName: Full=Uncharacterized protein {ECO:0000313|EMBL:KAF9612688.1};	Aldo/keto reductase family proteins	GO:0005829,cytosol; GO:0004032,alditol:NADP+ 1-oxidoreductase activity; GO:0003674,molecular_function; GO:0003824,catalytic activity; GO:0004033,aldo-keto reductase (NADP) activity; GO:0008106,alcohol dehydrogenase (NADP+) activity; GO:0016491,oxidoreductase activity; GO:0016614,oxidoreductase activity, acting on CH-OH group of donors; GO:0016616,oxidoreductase activity, acting on the CH-OH group…	--	--	--	--
IFM89_010483	3.1742	4.9425	5.3597	9.5153	8.8836	17.2168	47	79	89	165	200	252	1.31411	0.000572862	0.0127652	up	CM027379.1	51256079	51257181	+	IFM89_010483	--	K01183 chitinase [EC:3.2.1.14] | (RefSeq) endochitinase EP3-like (A)	ko00520: Amino sugar and nucleotide sugar metabolism; ko01100: Metabolic pathways	hypothetical protein IFM89_010483 [Coptis chinensis]	CHI5_ARATH RecName: Full=Endochitinase EP3 {ECO:0000303|PubMed:11525512}; EC=3.2.1.14; AltName: Full=Chitinase class IV {ECO:0000303|PubMed:11525512}; Short=AtchitIV {ECO:0000303|PubMed:11525512}; AltName: Full=Protein HOMOLOG OF CARROT EP3-3 CHITINASE {ECO:0000303|PubMed:11525512}; Short=AtEP3 {ECO:0000303|PubMed:11525512}; Flags: Precursor;	A0A835IDF9_9MAGN RecName: Full=Chitin-binding type-1 domain-containing protein {ECO:0000259|PROSITE:PS50941};	Predicted chitinase	GO:0008061,chitin binding; GO:0004568,chitinase activity; GO:0016998,cell wall macromolecule catabolic process; GO:0006032,chitin catabolic process; GO:0006952,defense response; GO:0000272,polysaccharide catabolic process; GO:0009617,response to bacterium; GO:0009611,response to wounding; GO:0010262,somatic embryogenesis; GO:0003674,molecular_function; GO:0005488,binding; GO:0097367,carbohydrate …	PF00182.22:Chitinase class I	--	--	--
novel.8909	1.4682	0.899	1.3314	3.2298	2.324	2.9957	59	39	60	152	142	119	1.12311	0.000574133	0.0127798	up	JADFTS010000091.1	32992	35496	.	--	--	--	--	hypothetical protein IFM89_038055 [Coptis chinensis]	--	A0A835H8H0_9MAGN SubName: Full=Uncharacterized protein {ECO:0000313|EMBL:KAF9595231.1};	--	GO:0003700,DNA-binding transcription factor activity; GO:0003674,molecular_function; GO:0140110,transcription regulator activity	--	--	--	--
IFM89_031703	5.1202	10.1827	13.781	22.4625	24.0673	21.9546	109	234	329	560	779	462	1.15039	0.000579913	0.0128517	up	CM027382.1	80503164	80504822	+	IFM89_031703	--	K15227 arogenate dehydrogenase (NADP+), plant [EC:1.3.1.78] | (RefSeq) arogenate dehydrogenase 2, chloroplastic-like (A)	ko00400: Phenylalanine, tyrosine and tryptophan biosynthesis; ko01100: Metabolic pathways; ko01110: Biosynthesis of secondary metabolites; ko01230: Biosynthesis of amino acids	hypothetical protein IFM89_031703 [Coptis chinensis]	TYRA2_ARATH RecName: Full=Arogenate dehydrogenase 2, chloroplastic; EC=1.3.1.78; AltName: Full=TyrAAT2; Flags: Precursor;	A0A835LP34_9MAGN RecName: Full=Prephenate/arogenate dehydrogenase domain-containing protein {ECO:0000259|PROSITE:PS51176};	Prephenate dehydrogenase (NADP+)	GO:0009507,chloroplast; GO:0033730,arogenate dehydrogenase (NADP+) activity; GO:0008977,prephenate dehydrogenase (NAD+) activity; GO:0004665,prephenate dehydrogenase (NADP+) activity; GO:0006571,tyrosine biosynthetic process; GO:0003674,molecular_function; GO:0003824,catalytic activity; GO:0016491,oxidoreductase activity; GO:0016627,oxidoreductase activity, acting on the CH-CH group of donors; GO…	PF02153.20:Prephenate dehydrogenase, nucleotide-binding domain	--	--	--
IFM89_034605	0.319	0.9287	1.0971	1.4007	4.0159	8.8966	7	22	27	36	134	193	2.5246	0.000582417	0.0128776	up	CM027382.1	68605576	68609363	-	IFM89_034605	--	K17506 protein phosphatase 1L [EC:3.1.3.16] | (RefSeq) probable protein phosphatase 2C 14 (A)	--	hypothetical protein IFM89_034605, partial [Coptis chinensis]	P2C14_ARATH RecName: Full=Probable protein phosphatase 2C 14; Short=AtPP2C14; EC=3.1.3.16; AltName: Full=Protein phosphatase AP2C4;	A0A835HRU5_9MAGN RecName: Full=Protein-serine/threonine phosphatase {ECO:0000256|ARBA:ARBA00013081}; EC=3.1.3.16 {ECO:0000256|ARBA:ARBA00013081}; Flags: Fragment;	Serine/threonine protein phosphatase	GO:0110165,cellular anatomical entity; GO:0046872,metal ion binding; GO:0017018,myosin phosphatase activity; GO:0006470,protein dephosphorylation; GO:0003674,molecular_function; GO:0005488,binding; GO:0043167,ion binding; GO:0043169,cation binding; GO:0003824,catalytic activity; GO:0004721,phosphoprotein phosphatase activity; GO:0004722,protein serine/threonine phosphatase activity; GO:0016787,hy…	PF00481.24:Protein phosphatase 2C	--	--	--
IFM89_014909	16.2172	18.0748	21.6915	50.848	62.4968	27.4286	64	77	96	235	375	107	1.24866	0.000631216	0.0137498	up	CM027384.1	394779	395024	-	IFM89_014909	--	K07375 tubulin beta | (RefSeq) tubulin beta chain-like (A)	ko04145: Phagosome	hypothetical protein IFM89_014909 [Coptis chinensis]	TBB1_ELEIN RecName: Full=Tubulin beta-1 chain; AltName: Full=Beta-1-tubulin;	A0A835LHZ9_9MAGN SubName: Full=Uncharacterized protein {ECO:0000313|EMBL:KAF9592419.1};	Beta tubulin	GO:0005737,cytoplasm; GO:0005874,microtubule; GO:0005525,GTP binding; GO:0005200,structural constituent of cytoskeleton; GO:0007017,microtubule-based process; GO:0000166,nucleotide binding; GO:0003674,molecular_function; GO:0005488,binding; GO:0017076,purine nucleotide binding; GO:0019001,guanyl nucleotide binding; GO:0032553,ribonucleotide binding; GO:0032555,purine ribonucleotide binding; GO:00…	--	--	--	--
IFM89_009248	3.8399	1.4822	6.2204	0.7651	0.9681	0.1295	60	25	109	14	23	2	-2.69226	0.000636826	0.0137926	down	CM027379.1	97439407	97453356	-	IFM89_009248	--	K09503 DnaJ homolog subfamily A member 2 | (RefSeq) dnaJ protein homolog (A)	ko04141: Protein processing in endoplasmic reticulum	hypothetical protein IFM89_009248 [Coptis chinensis]	DNJH2_ALLPO RecName: Full=DnaJ protein homolog 2; Flags: Precursor;	A0A835IBN3_9MAGN RecName: Full=DnaJ_C domain-containing protein {ECO:0000259|Pfam:PF01556};	Molecular chaperone (DnaJ superfamily)	GO:0005783,endoplasmic reticulum; GO:0016020,membrane; GO:0005524,ATP binding; GO:0030544,Hsp70 protein binding; GO:0046872,metal ion binding; GO:0051082,unfolded protein binding; GO:0006457,protein folding; GO:0009408,response to heat; GO:0000166,nucleotide binding; GO:0003674,molecular_function; GO:0005488,binding; GO:0017076,purine nucleotide binding; GO:0030554,adenyl nucleotide binding; GO:0…	PF01556.21:DnaJ C terminal domain	--	--	--
novel.7059	0.3624	0.702	0.1175	2.4476	1.9936	1.4332	11	23	4	87	92	43	2.23008	0.000646275	0.0139394	up	CM027384.1	82184433	82189540	+	--	--	K03030 26S proteasome regulatory subunit N11 | (RefSeq) 26S proteasome non-ATPase regulatory subunit 14 homolog (A)	ko03050: Proteasome	26S proteasome non-ATPase regulatory subunit, partial [Quercus aquifolioides]	PSDE_ARATH RecName: Full=26S proteasome non-ATPase regulatory subunit 14 homolog; EC=3.4.19.-; AltName: Full=26S proteasome regulatory subunit RPN11; Short=AtRPN11;	A0A6G5NJ96_9ROSI SubName: Full=26S proteasome non-ATPase regulatory subunit {ECO:0000313|EMBL:QBG58739.1}; Flags: Fragment;	26S proteasome regulatory complex, subunit RPN11	GO:0005634,nucleus; GO:0000502,proteasome complex; GO:0008541,proteasome regulatory particle, lid subcomplex; GO:0070122,NA; GO:0061578,Lys63-specific deubiquitinase activity; GO:0046872,metal ion binding; GO:0140492,metal-dependent deubiquitinase activity; GO:0008237,metallopeptidase activity; GO:0070628,proteasome binding; GO:0043161,proteasome-mediated ubiquitin-dependent protein catabolic pro…	PF13012.9:Maintenance of mitochondrial structure and function	--	--	--
novel.280	2.877	4.1593	3.1874	0.1117	0	0.8379	66	103	82	3	0	19	-3.54675	0.00065177	0.0140433	down	CM027377.1	25302559	25307865	-	--	--	K21777 G2/mitotic-specific cyclin-B, other | (RefSeq) G2/mitotic-specific cyclin-2-like (A)	--	hypothetical protein IFM89_013298 [Coptis chinensis]	CCB21_ORYSJ RecName: Full=Cyclin-B2-1; AltName: Full=CycB2-Os1; AltName: Full=G2/mitotic-specific cyclin-B2-1; Short=CycB2;1;	A0A835HCI1_9MAGN SubName: Full=Uncharacterized protein {ECO:0000313|EMBL:KAF9596751.1};	Cyclin B and related kinase-activating proteins	GO:0000307,cyclin-dependent protein kinase holoenzyme complex; GO:0005737,cytoplasm; GO:0005634,nucleus; GO:0016538,cyclin-dependent protein serine/threonine kinase regulator activity; GO:0051301,cell division; GO:0044772,mitotic cell cycle phase transition; GO:0000079,regulation of cyclin-dependent protein serine/threonine kinase activity; GO:0003674,molecular_function; GO:0019207,kinase regulat…	PF00134.26:Cyclin, N-terminal domain	--	--	--
IFM89_037624	6.8227	11.2522	20.5101	28.8208	26.4141	57.9881	132	235	445	653	777	1109	1.4694	0.000660602	0.0142043	up	CM027377.1	30992478	30994390	-	IFM89_037624	--	K00430 peroxidase [EC:1.11.1.7] | (RefSeq) cationic peroxidase 1 (A)	ko00940: Phenylpropanoid biosynthesis; ko01100: Metabolic pathways; ko01110: Biosynthesis of secondary metabolites	hypothetical protein IFM89_037624 [Coptis chinensis]	PER4_VITVI RecName: Full=Peroxidase 4 {ECO:0000250|UniProtKB:Q42578}; EC=1.11.1.7; Flags: Precursor;	A0A835IZZ3_9MAGN RecName: Full=Peroxidase {ECO:0000256|RuleBase:RU362060}; EC=1.11.1.7 {ECO:0000256|RuleBase:RU362060};	--	GO:0005576,extracellular region; GO:0020037,heme binding; GO:0046872,metal ion binding; GO:0004601,peroxidase activity; GO:0042744,hydrogen peroxide catabolic process; GO:0006979,response to oxidative stress; GO:0003674,molecular_function; GO:0005488,binding; GO:0046906,tetrapyrrole binding; GO:0097159,organic cyclic compound binding; GO:1901363,heterocyclic compound binding; GO:0043167,ion bindi…	PF00141.26:Peroxidase	--	--	--
IFM89_025485	4.3238	7.3434	6.6402	16.7171	12.797	12.6363	36	66	62	163	162	104	1.11469	0.000665056	0.0142707	up	CM027382.1	22719968	22720486	-	IFM89_025485	--	--	--	hypothetical protein IFM89_025485 [Coptis chinensis]	--	A0A835LP36_9MAGN SubName: Full=Uncharacterized protein {ECO:0000313|EMBL:KAF9602185.1};	--	--	--	--	--	--
novel.7656	3.8588	4.3997	5.1614	9.8852	11.8113	10.2097	26	32	39	78	121	68	1.16602	0.000680171	0.0145501	up	CM027385.1	51888456	51888994	+	--	--	--	--	--	--	--	--	--	--	--	--	--
IFM89_011459	4.3383	4.0894	5.7688	11.4385	8.1095	10.7795	57	58	85	176	162	140	1.00577	0.000682108	0.0145766	up	CM027377.1	7607785	7609369	-	IFM89_011459	--	K25075 pterocarpan synthase [EC:4.2.1.139] | (RefSeq) dirigent protein 2-like (A)	ko00943: Isoflavonoid biosynthesis; ko01100: Metabolic pathways; ko01110: Biosynthesis of secondary metabolites	hypothetical protein IFM89_011459 [Coptis chinensis]	DIR1_ARATH RecName: Full=Dirigent protein 1; Short=AtDIR1; Flags: Precursor;	A0A835IUP9_9MAGN RecName: Full=Dirigent protein {ECO:0000256|RuleBase:RU363099};	--	GO:0048046,apoplast; GO:0009699,phenylpropanoid biosynthetic process; GO:0006725,cellular aromatic compound metabolic process; GO:0008150,biological_process; GO:0008152,metabolic process; GO:0009058,biosynthetic process; GO:0009698,phenylpropanoid metabolic process; GO:0009987,cellular process; GO:0019438,aromatic compound biosynthetic process; GO:0019748,secondary metabolic process; GO:0044237,c…	PF03018.17:Dirigent-like protein	--	--	--
IFM89_023494	12.6355	31.1538	14.9073	6.529	10.91	5.8996	195	519	258	118	256	90	-1.41087	0.00069062	0.0147216	down	CM027380.1	84281887	84283081	-	IFM89_023494	--	--	--	hypothetical protein IFM89_023494 [Coptis chinensis]	--	A0A835I3I1_9MAGN SubName: Full=Uncharacterized protein {ECO:0000313|EMBL:KAF9610606.1};	--	--	PF04720.15:PDDEXK-like family of unknown function	--	--	--
novel.761	1.1842	2.0623	1.4994	12.8621	5.8413	1.8209	50	94	71	636	375	76	2.02169	0.000691718	0.0147216	up	CM027378.1	2588241	2590944	+	--	--	--	--	--	--	--	--	--	--	--	--	--
IFM89_037108	2.2451	2.7731	3.4544	5.9393	5.2116	10.0201	51	68	88	158	180	225	1.23272	0.000714718	0.0151032	up	CM027382.1	5122341	5123756	+	IFM89_037108	--	K23260 scopoletin glucosyltransferase [EC:2.4.1.128] | (RefSeq) scopoletin glucosyltransferase-like (A)	ko00999: Biosynthesis of various plant secondary metabolites; ko01110: Biosynthesis of secondary metabolites	hypothetical protein IFM89_037108 [Coptis chinensis]	UFOG7_FRAAN RecName: Full=UDP-glucose flavonoid 3-O-glucosyltransferase 7 {ECO:0000303|PubMed:18487633}; EC=2.4.1.91 {ECO:0000269|PubMed:18487633}; AltName: Full=Flavonol 3-O-glucosyltransferase 7 {ECO:0000303|PubMed:18487633}; Short=FaGT7 {ECO:0000303|PubMed:18487633};	A0A835LUA7_9MAGN RecName: Full=Glycosyltransferase {ECO:0000256|RuleBase:RU362057}; EC=2.4.1.- {ECO:0000256|RuleBase:RU362057};	UDP-glucuronosyl and UDP-glucosyl transferase	GO:0102360,daphnetin 3-O-glucosyltransferase activity; GO:0047893,flavonol 3-O-glucosyltransferase activity; GO:0102425,myricetin 3-O-glucosyltransferase activity; GO:0003674,molecular_function; GO:0003824,catalytic activity; GO:0016740,transferase activity; GO:0016757,glycosyltransferase activity; GO:0016758,hexosyltransferase activity; GO:0008194,UDP-glycosyltransferase activity; GO:0035251,UDP…	PF00201.21:UDP-glucoronosyl and UDP-glucosyl transferase	--	--	--
novel.6471	18.9468	9.1269	10.7283	3.074	4.7353	6.9002	200	104	127	38	76	72	-1.48365	0.000741028	0.0155021	down	CM027384.1	10014534	10015297	-	--	--	--	--	hypothetical protein FRX31_009511 [Thalictrum thalictroides]	--	A0A7J6WWG0_THATH SubName: Full=Uncharacterized protein {ECO:0000313|EMBL:KAF5200900.1};	--	--	--	--	--	--
IFM89_015516	1.2732	2.1833	1.6668	4.3258	3.2071	3.6997	47	87	69	187	180	135	1.04379	0.000753082	0.015707	up	CM027377.1	86499183	86502989	+	IFM89_015516	--	K17756 long-chain-alcohol oxidase [EC:1.1.3.20] | (RefSeq) long-chain-alcohol oxidase FAO4A-like (A)	--	hypothetical protein IFM89_015516 [Coptis chinensis]	FAO4A_ARATH RecName: Full=Long-chain-alcohol oxidase FAO4A; EC=1.1.3.20; AltName: Full=Long-chain fatty alcohol oxidase 4A;	A0A835MF78_9MAGN RecName: Full=Long-chain-alcohol oxidase {ECO:0000256|ARBA:ARBA00013125, ECO:0000256|PIRNR:PIRNR028937}; EC=1.1.3.20 {ECO:0000256|ARBA:ARBA00013125, ECO:0000256|PIRNR:PIRNR028937};	--	GO:0016021,integral component of membrane; GO:0050660,flavin adenine dinucleotide binding; GO:0046577,long-chain-alcohol oxidase activity; GO:0000166,nucleotide binding; GO:0003674,molecular_function; GO:0005488,binding; GO:0036094,small molecule binding; GO:0043167,ion binding; GO:0043168,anion binding; GO:0097159,organic cyclic compound binding; GO:1901265,nucleoside phosphate binding; GO:19013…	PF00732.22:GMC oxidoreductase	--	--	--
IFM89_024163	130.607	151.852	113.559	37.3064	88.914	82.7682	4532	5688	4419	1516	4691	2839	-1.00272	0.000768023	0.0159073	down	CM027379.1	80040050	80051056	-	IFM89_024163	--	K21867 potassium channel | (RefSeq) potassium channel KAT3 (A)	--	hypothetical protein IFM89_024163 [Coptis chinensis]	KAT3_ARATH RecName: Full=Potassium channel KAT3; AltName: Full=AKT4; AltName: Full=AtKC1; AltName: Full=Potassium channel TKC;	A0A835M9E8_9MAGN RecName: Full=Potassium channel {ECO:0000256|RuleBase:RU369015};	K+-channel ERG and related proteins, contain PAS/PAC sensor domain	GO:0005783,endoplasmic reticulum; GO:0016021,integral component of membrane; GO:0005886,plasma membrane; GO:0005249,voltage-gated potassium channel activity; GO:0071805,potassium ion transmembrane transport; GO:0034765,regulation of ion transmembrane transport; GO:0009624,response to nematode; GO:0003674,molecular_function; GO:0005215,transporter activity; GO:0005216,ion channel activity; GO:0005…	PF00520.34:Ion transport protein	--	--	--
novel.1346	4.1742	4.7106	3.2484	1.1881	2.2629	2.2777	165	201	144	55	136	89	-1.16345	0.000790293	0.0162556	down	CM027378.1	78603217	78607508	+	--	--	--	--	--	--	--	--	--	--	--	--	--
novel.6664	1.4092	0.5375	2.4392	4.1054	5.8335	10.2305	17	7	33	58	107	122	2.11631	0.000791591	0.0162662	up	CM027384.1	28072951	28073702	.	--	--	--	--	--	--	--	--	--	--	--	--	--
IFM89_037642	1.8868	2.3895	2.4278	8.4023	4.0527	4.0107	79	108	114	412	258	166	1.20746	0.000793714	0.0162778	up	CM027378.1	110077948	110082667	-	IFM89_037642	--	K15449 tRNA wybutosine-synthesizing protein 1 [EC:4.1.3.44] | (RefSeq) probable methyltransferase PMT28 (A)	--	hypothetical protein IFM89_037642 [Coptis chinensis]	PMTR_ARATH RecName: Full=Probable methyltransferase PMT27; EC=2.1.1.-;	A0A835MGR0_9MAGN SubName: Full=Uncharacterized protein {ECO:0000313|EMBL:KAF9623126.1};	--	GO:0005737,cytoplasm; GO:0005789,endoplasmic reticulum membrane; GO:0016021,integral component of membrane; GO:0008168,methyltransferase activity; GO:0032259,methylation; GO:0003674,molecular_function; GO:0003824,catalytic activity; GO:0016740,transferase activity; GO:0016741,transferase activity, transferring one-carbon groups; GO:0008150,biological_process; GO:0008152,metabolic process; GO:0005…	PF03141.19:Putative S-adenosyl-L-methionine-dependent methyltransferase	--	--	--
IFM89_013937	5.988	10.2067	9.9849	4.0905	3.5445	5.2702	100	184	187	80	90	87	-1.1115	0.000795334	0.0162811	down	CM027383.1	4152238	4153526	+	IFM89_013937	--	K00279 cytokinin dehydrogenase [EC:1.5.99.12] | (RefSeq) cytokinin dehydrogenase 6 (A)	ko00908: Zeatin biosynthesis; ko01110: Biosynthesis of secondary metabolites	hypothetical protein IFM89_013937 [Coptis chinensis]	CKX1_ARATH RecName: Full=Cytokinin dehydrogenase 1; EC=1.5.99.12; AltName: Full=Cytokinin oxidase 1; Short=AtCKX1; Short=CKO 1; Flags: Precursor;	A0A835LMG9_9MAGN RecName: Full=Cytokinin dehydrogenase {ECO:0000256|ARBA:ARBA00011928}; EC=1.5.99.12 {ECO:0000256|ARBA:ARBA00011928};	Proteins containing the FAD binding domain	GO:0005773,vacuole; GO:0019139,cytokinin dehydrogenase activity; GO:0071949,FAD binding; GO:0016491,oxidoreductase activity; GO:0009823,cytokinin catabolic process; GO:0048507,meristem development; GO:0003674,molecular_function; GO:0003824,catalytic activity; GO:0016645,oxidoreductase activity, acting on the CH-NH group of donors; GO:0000166,nucleotide binding; GO:0005488,binding; GO:0036094,smal…	PF09265.13:Cytokinin dehydrogenase 1, FAD and cytokinin binding	--	--	--
IFM89_016978	6.8937	9.7142	11.1689	16.2503	34.3565	18.8591	71	108	129	196	538	192	1.24202	0.000796219	0.0162811	up	CM027381.1	78673458	78674099	+	IFM89_016978	--	K13382 (S)-norcoclaurine synthase [EC:4.2.1.78] | (RefSeq) uncharacterized protein LOC113340282 (A)	ko00950: Isoquinoline alkaloid biosynthesis; ko01100: Metabolic pathways; ko01110: Biosynthesis of secondary metabolites	hypothetical protein IFM89_016978 [Coptis chinensis]	NCS_THLFG RecName: Full=S-norcoclaurine synthase; EC=4.2.1.78 {ECO:0000269|PubMed:15447655, ECO:0000269|PubMed:17696451, ECO:0000269|PubMed:19004827}; Flags: Precursor;	A0A835HTD0_9MAGN SubName: Full=Uncharacterized protein {ECO:0000313|EMBL:KAF9605401.1};	--	GO:0050474,(S)-norcoclaurine synthase activity; GO:0009820,alkaloid metabolic process; GO:0006952,defense response; GO:0003674,molecular_function; GO:0003824,catalytic activity; GO:0016829,lyase activity; GO:0016835,carbon-oxygen lyase activity; GO:0016836,hydro-lyase activity; GO:0006807,nitrogen compound metabolic process; GO:0008150,biological_process; GO:0008152,metabolic process; GO:0071704,…	--	--	--	--
novel.8291	2.3524	4.9683	4.3242	1.3986	2.1809	2.2092	293	668	604	204	413	272	-1.09128	0.000798311	0.016303	down	JADFTS010000032.1	198690	209574	+	--	--	K10727 chromatin licensing and DNA replication factor 1 | (RefSeq) CDT1-like protein a, chloroplastic isoform X1 (A)	--	hypothetical protein AQUCO_03500039v1 [Aquilegia coerulea]	CDT1A_ARATH RecName: Full=CDT1-like protein a, chloroplastic; Short=AtCDT1a; Flags: Precursor;	A0A2G5CWS9_AQUCA SubName: Full=Uncharacterized protein {ECO:0000313|EMBL:PIA35387.1};	--	GO:0009507,chloroplast; GO:0005634,nucleus; GO:0004693,cyclin-dependent protein serine/threonine kinase activity; GO:0003677,DNA binding; GO:0070182,DNA polymerase binding; GO:0019901,protein kinase binding; GO:0009658,chloroplast organization; GO:0051276,chromosome organization; GO:0006260,DNA replication; GO:0000076,DNA replication checkpoint signaling; GO:0071163,DNA replication preinitiation …	PF17874.4:MalT-like TPR region	--	--	--
IFM89_013083	11.5848	7.532	7.6766	3.4033	3.2155	5.9136	218	153	162	75	92	110	-1.18507	0.00082155	0.0166037	down	CM027382.1	79468187	79469849	+	IFM89_013083	--	K01184 polygalacturonase [EC:3.2.1.15] | (RefSeq) polygalacturonase-like (A)	ko00040: Pentose and glucuronate interconversions; ko01100: Metabolic pathways	hypothetical protein IFM89_013083 [Coptis chinensis]	PGLR_PRUPE RecName: Full=Polygalacturonase; Short=PG; EC=3.2.1.15; AltName: Full=Pectinase; Flags: Precursor;	A0A835LM93_9MAGN SubName: Full=Uncharacterized protein {ECO:0000313|EMBL:KAF9600848.1};	--	GO:0005576,extracellular region; GO:0004650,polygalacturonase activity; GO:0005975,carbohydrate metabolic process; GO:0071555,cell wall organization; GO:0009835,fruit ripening; GO:0003674,molecular_function; GO:0003824,catalytic activity; GO:0004553,hydrolase activity, hydrolyzing O-glycosyl compounds; GO:0016787,hydrolase activity; GO:0016798,hydrolase activity, acting on glycosyl bonds; GO:0008…	PF00295.20:Glycosyl hydrolases family 28	--	--	--
IFM89_020743	89.6233	91.5336	84.4504	18.5042	63.2271	36.0859	1005	1108	1062	243	1078	400	-1.25121	0.000827773	0.0167133	down	CM027379.1	104525085	104526253	+	IFM89_020743	--	--	--	hypothetical protein IFM89_028536 [Coptis chinensis]	EDM2_ARATH RecName: Full=Protein ENHANCED DOWNY MILDEW 2 {ECO:0000303|PubMed:23940361};	A0A835IBW4_9MAGN SubName: Full=Uncharacterized protein {ECO:0000313|EMBL:KAF9616070.1};	--	GO:0000792,heterochromatin; GO:0005634,nucleus; GO:0032991,protein-containing complex; GO:0003700,DNA-binding transcription factor activity; GO:0140566,histone reader activity; GO:0046872,metal ion binding; GO:0043565,sequence-specific DNA binding; GO:0050832,defense response to fungus; GO:0032776,DNA methylation on cytosine; GO:0090436,leaf pavement cell development; GO:0009911,positive regulati…	--	--	--	--
IFM89_032356	135.337	184.261	356.414	432.207	516.172	516.153	1865	2741	5508	6975	10815	7031	1.03241	0.000829582	0.0167175	up	CM027381.1	81832866	81833926	-	IFM89_032356	--	K13382 (S)-norcoclaurine synthase [EC:4.2.1.78] | (RefSeq) uncharacterized protein LOC113340282 (A)	ko00950: Isoquinoline alkaloid biosynthesis; ko01100: Metabolic pathways; ko01110: Biosynthesis of secondary metabolites	hypothetical protein IFM89_032356 [Coptis chinensis]	NCS2_PAPSO RecName: Full=S-norcoclaurine synthase 2 {ECO:0000303|PubMed:15925393}; Short=PsNCS2 {ECO:0000303|PubMed:15925393}; EC=4.2.1.78 {ECO:0000269|PubMed:15925393}; Flags: Precursor;	A0A835LXT8_9MAGN RecName: Full=Bet_v_1 domain-containing protein {ECO:0000259|Pfam:PF00407};	--	GO:0005789,endoplasmic reticulum membrane; GO:0016021,integral component of membrane; GO:0005774,vacuolar membrane; GO:0050474,(S)-norcoclaurine synthase activity; GO:1901010,(S)-reticuline metabolic process; GO:0006952,defense response; GO:0002238,response to molecule of fungal origin; GO:0003674,molecular_function; GO:0003824,catalytic activity; GO:0016829,lyase activity; GO:0016835,carbon-oxyg…	PF00407.22:Pathogenesis-related protein Bet v 1 family	--	--	--
IFM89_021040	2.7131	3.249	5.3401	9.2669	6.0278	9.0373	164	212	362	656	554	540	1.01931	0.000850944	0.0170491	up	CM027384.1	88888103	88893389	+	IFM89_021040	--	K03164 DNA topoisomerase II [EC:5.6.2.2] | (RefSeq) DNA topoisomerase 2-like (A)	--	hypothetical protein IFM89_021040 [Coptis chinensis]	TOP2_ARATH RecName: Full=DNA topoisomerase 2; EC=5.6.2.2 {ECO:0000255|PROSITE-ProRule:PRU00995}; AltName: Full=DNA topoisomerase II;	A0A835H730_9MAGN RecName: Full=DNA topoisomerase 2 {ECO:0000256|RuleBase:RU362094}; EC=5.6.2.2 {ECO:0000256|RuleBase:RU362094};	DNA topoisomerase type II	GO:0005634,nucleus; GO:0005524,ATP binding; GO:0003677,DNA binding; GO:0003916,DNA topoisomerase activity; GO:0003918,DNA topoisomerase type II (double strand cut, ATP-hydrolyzing) activity; GO:0046872,metal ion binding; GO:0006265,DNA topological change; GO:0000712,resolution of meiotic recombination intermediates; GO:0000819,sister chromatid segregation; GO:0000166,nucleotide binding; GO:000367…	PF00521.23:DNA gyrase/topoisomerase IV, subunit A	--	--	--
IFM89_028727	3.2808	4.5589	4.0226	6.4201	19.5999	13.6907	24	36	33	55	218	99	1.66428	0.000852207	0.017058	up	CM027385.1	83554672	83556542	-	IFM89_028727	--	--	--	hypothetical protein IFM89_028727 [Coptis chinensis]	--	A0A835LET3_9MAGN SubName: Full=Uncharacterized protein {ECO:0000313|EMBL:KAF9589792.1};	--	--	PF00139.22:Legume lectin domain	--	--	--
IFM89_024490	27.4274	21.9433	44.2824	12.2425	2.3232	0.6306	132	114	239	69	17	3	-2.71592	0.000873494	0.0174339	down	CM027384.1	10663619	10664080	-	IFM89_024490	--	K14293 importin subunit beta-1 | (RefSeq) importin subunit beta-1-like (A)	ko03013: Nucleocytoplasmic transport	hypothetical protein IFM89_024490 [Coptis chinensis]	CFXQ_TRICV RecName: Full=Protein CfxQ homolog;	A0A835H8R1_9MAGN SubName: Full=Uncharacterized protein {ECO:0000313|EMBL:KAF9593673.1};	AAA+-type ATPase	GO:0009507,chloroplast; GO:0005524,ATP binding; GO:0016887,ATP hydrolysis activity; GO:0000166,nucleotide binding; GO:0003674,molecular_function; GO:0005488,binding; GO:0017076,purine nucleotide binding; GO:0030554,adenyl nucleotide binding; GO:0032553,ribonucleotide binding; GO:0032555,purine ribonucleotide binding; GO:0032559,adenyl ribonucleotide binding; GO:0035639,purine ribonucleoside triph…	PF00004.32:ATPase family associated with various cellular activities (AAA)	--	--	--
IFM89_002620	3.6048	5.7408	5.6704	10.3758	16.0635	8.113	89	153	157	300	603	198	1.1204	0.000879558	0.017506	up	CM027385.1	84922103	84934404	+	IFM89_002620	--	K13366 polyamine oxidase [EC:1.5.3.14 1.5.3.16 1.5.3.-] | (RefSeq) polyamine oxidase 6-like (A)	ko00330: Arginine and proline metabolism; ko00410: beta-Alanine metabolism; ko01100: Metabolic pathways	hypothetical protein IFM89_002620 [Coptis chinensis]	PAO1_MAIZE RecName: Full=Polyamine oxidase 1 {ECO:0000303|Ref.2}; EC=1.5.3.14 {ECO:0000269|Ref.4}; EC=1.5.3.15 {ECO:0000269|Ref.4}; Flags: Precursor;	A0A835LD59_9MAGN SubName: Full=Uncharacterized protein {ECO:0000313|EMBL:KAF9587439.1};	Amine oxidase	GO:0048046,apoplast; GO:0009505,plant-type cell wall; GO:0050660,flavin adenine dinucleotide binding; GO:0052898,N1-acetylspermidine:oxygen oxidoreductase (propane-1,3-diamine-forming) activity; GO:0052893,N1-acetylspermine:oxygen oxidoreductase (propane-1,3-diamine-forming) activity; GO:0052897,N8-acetylspermidine:oxygen oxidoreductase (propane-1,3-diamine-forming) activity; GO:0016491,oxidoredu…	PF01593.27:Flavin containing amine oxidoreductase	--	--	--
IFM89_006165	12.3736	13.4091	7.8068	4.4855	5.8349	6.9673	212	248	150	90	152	118	-1.04233	0.000952332	0.0185115	down	CM027385.1	11110548	11114133	-	IFM89_006165	--	K05387 glutamate receptor, ionotropic, plant | (RefSeq) glutamate receptor 2.2-like (A)	--	hypothetical protein IFM89_006165 [Coptis chinensis]	GLR23_ARATH RecName: Full=Glutamate receptor 2.3; AltName: Full=Ligand-gated ion channel 2.3; Flags: Precursor;	A0A835GUQ7_9MAGN RecName: Full=ANF_receptor domain-containing protein {ECO:0000259|Pfam:PF01094};	Glutamate-gated kainate-type ion channel receptor subunit GluR5 and related subunits	GO:0016021,integral component of membrane; GO:0005886,plasma membrane; GO:0005262,calcium channel activity; GO:0008066,glutamate receptor activity; GO:0015276,ligand-gated ion channel activity; GO:0038023,signaling receptor activity; GO:0006816,calcium ion transport; GO:0019722,calcium-mediated signaling; GO:0071230,cellular response to amino acid stimulus; GO:0003674,molecular_function; GO:00052…	PF01094.31:Receptor family ligand binding region	--	--	--
IFM89_023666	1.2098	1.0814	0.9463	2.7004	1.7449	2.8986	57	55	50	149	125	135	1.09358	0.000966807	0.0186883	up	CM027381.1	96860086	96865621	-	IFM89_023666	--	K06678 condensin complex subunit 3 | (RefSeq) condensin complex subunit 3 (A)	--	hypothetical protein IFM89_023666 [Coptis chinensis]	--	A0A835HV02_9MAGN RecName: Full=Cnd3 domain-containing protein {ECO:0000259|Pfam:PF12719};	Chromosome condensation complex Condensin, subunit G	GO:0000796,condensin complex; GO:0051301,cell division; GO:0007076,mitotic chromosome condensation; GO:0008150,biological_process; GO:0009987,cellular process; GO:0000070,mitotic sister chromatid segregation; GO:0000278,mitotic cell cycle; GO:0000280,nuclear division; GO:0000819,sister chromatid segregation; GO:0006996,organelle organization; GO:0007049,cell cycle; GO:0007059,chromosome segregati…	PF12719.10:Nuclear condensing complex subunits, C-term domain	--	--	--
IFM89_032109	23.3643	14.8333	32.8198	162.611	90.6581	41.9336	518	355	816	4222	3056	919	1.96742	0.000972356	0.0187543	up	CM027378.1	2559335	2561497	-	IFM89_032109	--	K14975 codeine 3-O-demethylase [EC:1.14.11.32] | (RefSeq) codeine O-demethylase (A)	ko00950: Isoquinoline alkaloid biosynthesis; ko01100: Metabolic pathways; ko01110: Biosynthesis of secondary metabolites	hypothetical protein IFM89_032109 [Coptis chinensis]	NCS1_COPJA RecName: Full=S-norcoclaurine synthase 1; Short=CjNCS1; EC=4.2.1.78;	A0A835ISF1_9MAGN RecName: Full=Fe2OG dioxygenase domain-containing protein {ECO:0000259|PROSITE:PS51471};	Iron/ascorbate family oxidoreductases	GO:0050474,(S)-norcoclaurine synthase activity; GO:0046872,metal ion binding; GO:0016491,oxidoreductase activity; GO:0009820,alkaloid metabolic process; GO:0003674,molecular_function; GO:0003824,catalytic activity; GO:0016829,lyase activity; GO:0016835,carbon-oxygen lyase activity; GO:0016836,hydro-lyase activity; GO:0005488,binding; GO:0043167,ion binding; GO:0043169,cation binding; GO:0006807,n…	PF14226.9:non-haem dioxygenase in morphine synthesis N-terminal	--	--	--
IFM89_017643	2.3087	4.2355	8.3155	13.7612	12.5346	15.5246	51	101	206	356	421	339	1.40657	0.00097292	0.0187543	up	CM027385.1	82357155	82359599	+	IFM89_017643	--	K13066 caffeic acid 3-O-methyltransferase / acetylserotonin O-methyltransferase [EC:2.1.1.68 2.1.1.4] | (RefSeq) caffeic acid 3-O-methyltransferase 1-like (A)	ko00380: Tryptophan metabolism; ko00940: Phenylpropanoid biosynthesis; ko01100: Metabolic pathways; ko01110: Biosynthesis of secondary metabolites	hypothetical protein IFM89_017643 [Coptis chinensis]	COMT1_PRUDU RecName: Full=Caffeic acid 3-O-methyltransferase; Short=CAOMT; Short=COMT; EC=2.1.1.68; AltName: Full=S-adenosysl-L-methionine:caffeic acid 3-O-methyltransferase;	A0A835GY28_9MAGN SubName: Full=Uncharacterized protein {ECO:0000313|EMBL:KAF9588964.1};	Hydroxyindole-O-methyltransferase and related SAM-dependent methyltransferases	GO:0047763,caffeate O-methyltransferase activity; GO:0046983,protein dimerization activity; GO:0009809,lignin biosynthetic process; GO:0032259,methylation; GO:0003674,molecular_function; GO:0003824,catalytic activity; GO:0008168,methyltransferase activity; GO:0008171,O-methyltransferase activity; GO:0016740,transferase activity; GO:0016741,transferase activity, transferring one-carbon groups; GO:…	PF00891.21:O-methyltransferase domain	--	--	--
IFM89_002015	2.5005	2.2891	1.9936	3.4414	5.1272	7.5589	85	84	76	137	265	254	1.16668	0.00098706	0.0189743	up	CM027382.1	23522294	23526405	+	IFM89_002015	--	K16818 phospholipase A1 [EC:3.1.1.32] | (RefSeq) phospholipase A(1) DAD1, chloroplastic-like (A)	ko00564: Glycerophospholipid metabolism; ko00592: alpha-Linolenic acid metabolism; ko01100: Metabolic pathways; ko01110: Biosynthesis of secondary metabolites	hypothetical protein IFM89_002015 [Coptis chinensis]	OBL1_ARATH RecName: Full=Triacylglycerol lipase OBL1 {ECO:0000305}; EC=3.1.1.- {ECO:0000269|PubMed:29178188}; AltName: Full=Oil body lipase 1 {ECO:0000303|PubMed:29178188}; Short=AtOBL1 {ECO:0000303|PubMed:29178188};	A0A835LM36_9MAGN RecName: Full=Lipase_3 domain-containing protein {ECO:0000259|Pfam:PF01764};	Predicted lipase	GO:0016021,integral component of membrane; GO:0005811,lipid droplet; GO:0090406,pollen tube; GO:0047372,acylglycerol lipase activity; GO:0033878,hormone-sensitive lipase activity; GO:0004806,triglyceride lipase activity; GO:0016042,lipid catabolic process; GO:0003674,molecular_function; GO:0003824,catalytic activity; GO:0016298,lipase activity; GO:0016787,hydrolase activity; GO:0016788,hydrolase …	PF01764.28:Lipase (class 3)	--	--	--
novel.8079	0.6653	5.2151	4.7918	0.9614	0.5386	0.4142	13	110	105	22	16	8	-2.56661	0.000988029	0.0189754	down	JADFTS010000018.1	251604	253099	+	--	--	K02931 large subunit ribosomal protein L5 | (RefSeq) 50S ribosomal protein L5, chloroplastic (A)	ko03010: Ribosome	hypothetical protein IFM89_023736 [Coptis chinensis]	RK5_ARATH RecName: Full=50S ribosomal protein L5, chloroplastic; Flags: Precursor;	A0A835IFQ7_9MAGN RecName: Full=Ribosomal_L5 domain-containing protein {ECO:0000259|Pfam:PF00281};	Mitochondrial/chloroplast ribosomal protein L5/L7	GO:0009507,chloroplast; GO:0009941,chloroplast envelope; GO:0009570,chloroplast stroma; GO:0005829,cytosol; GO:0022626,cytosolic ribosome; GO:0003729,mRNA binding; GO:0003723,RNA binding; GO:0019843,rRNA binding; GO:0003735,structural constituent of ribosome; GO:0006412,translation; GO:0003674,molecular_function; GO:0003676,nucleic acid binding; GO:0005488,binding; GO:0097159,organic cyclic compo…	PF00281.22:Ribosomal protein L5	--	--	--
IFM89_017434	8.5782	8.8296	5.5245	3.2555	4.1374	2.3141	90	100	65	40	66	24	-1.31169	0.00102334	0.0195289	down	CM027384.1	26915823	26918951	+	IFM89_017434	--	--	--	hypothetical protein IFM89_017434 [Coptis chinensis]	AGDP1_ARATH RecName: Full=Protein AGENET DOMAIN (AGD)-CONTAINING P1 {ECO:0000303|PubMed:30382101}; AltName: Full=Protein ONE AGENET DOMAIN-CONTAINING PROTEIN {ECO:0000303|PubMed:30425322};	A0A835H5W8_9MAGN SubName: Full=Uncharacterized protein {ECO:0000313|EMBL:KAF9592815.1};	--	GO:0000775,chromosome, centromeric region; GO:0000792,heterochromatin; GO:0005634,nucleus; GO:0042393,histone binding; GO:0035064,methylated histone binding; GO:0006346,DNA methylation-dependent heterochromatin formation; GO:0036123,histone H3-K9 dimethylation; GO:0044030,regulation of DNA methylation; GO:0003674,molecular_function; GO:0005488,binding; GO:0005515,protein binding; GO:0140030,modif…	PF05641.15:Agenet domain	--	--	--
novel.4994	2.8311	3.1612	2.6598	1.0361	1.9285	1.1763	112	135	118	48	116	46	-1.13536	0.0010234	0.0195289	down	CM027382.1	45674021	45677009	-	--	--	K12842 U2-associated protein SR140 | (RefSeq) protein RRC1-like isoform X1 (A)	ko03040: Spliceosome	hypothetical protein IFM89_013614 [Coptis chinensis]	RRC1_ARATH RecName: Full=Protein RRC1 {ECO:0000303|PubMed:22324426}; AltName: Full=Reduced red-light responses in cry1cry2 background 1 {ECO:0000303|PubMed:22324426};	A0A835M5N3_9MAGN SubName: Full=Uncharacterized protein {ECO:0000313|EMBL:KAF9620588.1};	Predicted splicing regulator, contains RRM, SWAP and RPR domains	GO:0016607,nuclear speck; GO:0005634,nucleus; GO:0003723,RNA binding; GO:0006397,mRNA processing; GO:0008380,RNA splicing; GO:0003674,molecular_function; GO:0003676,nucleic acid binding; GO:0005488,binding; GO:0097159,organic cyclic compound binding; GO:1901363,heterocyclic compound binding; GO:0006139,nucleobase-containing compound metabolic process; GO:0006396,RNA processing; GO:0006725,cellula…	PF08312.15:cwf21 domain	--	--	--
IFM89_002313	0.8329	0.8528	0.3909	8.497	5.3049	0.5765	19	21	10	227	184	13	2.70513	0.0010269	0.0195777	up	CM027378.1	84124817	84126796	+	IFM89_002313	--	K03320 ammonium transporter, Amt family | (RefSeq) ammonium transporter 3 member 1-like (A)	--	hypothetical protein IFM89_002313, partial [Coptis chinensis]	AMT25_MEDTR RecName: Full=Ammonium transporter 2 member 5 {ECO:0000303|PubMed:26511916}; Short=Ammonium transporter 2;5 {ECO:0000303|PubMed:26511916}; Short=MtAMT2;5 {ECO:0000303|PubMed:26511916};	A0A835IL89_9MAGN RecName: Full=Ammonium transporter {ECO:0000256|RuleBase:RU362002};	Ammonia permease	GO:0005887,integral component of plasma membrane; GO:0005886,plasma membrane; GO:0008519,ammonium transmembrane transporter activity; GO:0072488,ammonium transmembrane transport; GO:0009610,response to symbiotic fungus; GO:0003674,molecular_function; GO:0005215,transporter activity; GO:0005216,ion channel activity; GO:0005261,cation channel activity; GO:0008324,cation transmembrane transporter ac…	PF00909.24:Ammonium Transporter Family	--	--	--
novel.4227	4.567	3.8707	5.9354	0.6223	2.4925	0.5898	94	86	137	15	78	12	-2.01751	0.00103287	0.0196557	down	CM027381.1	55977593	55979194	+	--	--	K00111 glycerol-3-phosphate dehydrogenase [EC:1.1.5.3] | (RefSeq) glycerol-3-phosphate dehydrogenase SDP6, mitochondrial-like (A)	ko00564: Glycerophospholipid metabolism; ko01110: Biosynthesis of secondary metabolites	hypothetical protein IFM89_003070 [Coptis chinensis]	SDP6_ARATH RecName: Full=Glycerol-3-phosphate dehydrogenase SDP6, mitochondrial {ECO:0000303|PubMed:18599644}; EC=1.1.5.3 {ECO:0000269|PubMed:12586344, ECO:0000269|PubMed:18599644}; AltName: Full=Protein SUGAR-DEPENDENT 6 {ECO:0000303|PubMed:18599644}; Flags: Precursor;	A0A835IB39_9MAGN RecName: Full=DAO domain-containing protein {ECO:0000259|Pfam:PF01266};	Glycerol-3-phosphate dehydrogenase	GO:0005829,cytosol; GO:0009331,glycerol-3-phosphate dehydrogenase complex; GO:0005743,mitochondrial inner membrane; GO:0005739,mitochondrion; GO:0004368,glycerol-3-phosphate dehydrogenase (quinone) activity; GO:0052591,sn-glycerol-3-phosphate:ubiquinone-8 oxidoreductase activity; GO:0019563,glycerol catabolic process; GO:0006072,glycerol-3-phosphate metabolic process; GO:0006127,glycerophosphate …	PF01266.27:FAD dependent oxidoreductase	--	--	--
novel.2899	3.1707	3.1722	4.8629	1.2996	1.8768	0.8981	50	54	86	24	45	14	-1.52696	0.00104694	0.0198508	down	CM027379.1	118842645	118846852	+	--	--	--	--	--	--	--	--	--	--	--	--	--
IFM89_038479	5.0503	8.1093	2.5734	0.9857	2.4675	1.1678	105	182	60	24	78	24	-1.83956	0.00105591	0.0199414	down	CM027384.1	9017733	9019028	-	IFM89_038479	--	K12818 ATP-dependent RNA helicase DHX8/PRP22 [EC:3.6.4.13] | (GenBank) NB-ARC domain disease resistance protein, putative (A)	ko03040: Spliceosome	hypothetical protein IFM89_038479 [Coptis chinensis]	RGA1_SOLBU RecName: Full=Putative disease resistance protein RGA1; AltName: Full=RGA3-blb;	A0A835LK12_9MAGN SubName: Full=Uncharacterized protein {ECO:0000313|EMBL:KAF9595327.1};	Apoptotic ATPase	GO:0043531,ADP binding; GO:0005524,ATP binding; GO:0050832,defense response to fungus; GO:0000166,nucleotide binding; GO:0003674,molecular_function; GO:0005488,binding; GO:0017076,purine nucleotide binding; GO:0030554,adenyl nucleotide binding; GO:0032553,ribonucleotide binding; GO:0032555,purine ribonucleotide binding; GO:0032559,adenyl ribonucleotide binding; GO:0036094,small molecule binding; …	PF13855.9:Leucine rich repeat	--	--	--
IFM89_033347	0.9142	1.3089	1.1117	2.8033	2.2959	3.2791	22	34	30	79	84	78	1.23789	0.00107947	0.0202651	up	CM027383.1	34964079	34965578	-	IFM89_033347	--	K13496 UDP-glucosyltransferase 73C [EC:2.4.1.-] | (RefSeq) UDP-glycosyltransferase 73C3-like isoform X1 (A)	ko00908: Zeatin biosynthesis; ko01110: Biosynthesis of secondary metabolites	hypothetical protein IFM89_033347 [Coptis chinensis]	U73C3_ARATH RecName: Full=UDP-glycosyltransferase 73C3; EC=2.4.1.-;	A0A835LNH7_9MAGN RecName: Full=Glycosyltransferase {ECO:0000256|RuleBase:RU362057}; EC=2.4.1.- {ECO:0000256|RuleBase:RU362057};	UDP-glucuronosyl and UDP-glucosyl transferase	GO:0008194,UDP-glycosyltransferase activity; GO:0003674,molecular_function; GO:0003824,catalytic activity; GO:0016740,transferase activity; GO:0016757,glycosyltransferase activity	PF00201.21:UDP-glucoronosyl and UDP-glucosyl transferase	--	--	--
IFM89_013921	6.5882	7.9811	12.9923	1.9474	3.9998	3.8451	52	68	115	18	48	30	-1.57364	0.00108619	0.0203545	down	CM027383.1	4387223	4387874	+	IFM89_013921	--	K18532 adenylate kinase [EC:2.7.4.3] | (RefSeq) (R)-specific enoyl-CoA hydratase (A)	ko00230: Purine metabolism; ko01100: Metabolic pathways; ko01110: Biosynthesis of secondary metabolites; ko01232: Nucleotide metabolism; ko01240: Biosynthesis of cofactors; ko03008: Ribosome biogenesis in eukaryotes	hypothetical protein IFM89_013921 [Coptis chinensis]	--	A0A835LII8_9MAGN RecName: Full=MaoC-like domain-containing protein {ECO:0000259|Pfam:PF01575};	Peroxisomal multifunctional beta-oxidation protein and related enzymes	--	PF01575.22:MaoC like domain	--	--	--
IFM89_003973	1.282	1.435	1.5242	4.926	3.0564	3.0801	24	29	32	108	87	57	1.29499	0.00108839	0.0203775	up	CM027384.1	78915598	78918143	+	IFM89_003973	--	K23877 xyloglucan O-acetyltransferase | (RefSeq) protein ALTERED XYLOGLUCAN 4 (A)	--	hypothetical protein IFM89_003973 [Coptis chinensis]	TBL44_ARATH RecName: Full=Protein PMR5; AltName: Full=Powdery mildew resistance protein 5; AltName: Full=Protein trichome birefringence-like 44;	A0A835H137_9MAGN RecName: Full=PMR5N domain-containing protein {ECO:0000259|Pfam:PF14416};	--	GO:0005783,endoplasmic reticulum; GO:0005794,Golgi apparatus; GO:0016021,integral component of membrane; GO:0016413,O-acetyltransferase activity; GO:0006952,defense response; GO:0009620,response to fungus; GO:0003674,molecular_function; GO:0003824,catalytic activity; GO:0008374,O-acyltransferase activity; GO:0016407,acetyltransferase activity; GO:0016740,transferase activity; GO:0016746,acyltrans…	PF13839.9:GDSL/SGNH-like Acyl-Esterase family found in Pmr5 and Cas1p	--	--	--
IFM89_014009	0.7312	1.1289	1.1954	3.4341	5.2099	2.0958	12	20	22	66	130	34	1.73337	0.00108974	0.0203845	up	CM027378.1	94620649	94621849	-	IFM89_014009	--	K20869 putative beta-1,4-xylosyltransferase IRX9 [EC:2.4.2.-] | (RefSeq) probable beta-1,4-xylosyltransferase IRX9 (A)	--	hypothetical protein IFM89_014009 [Coptis chinensis]	IRX9_ARATH RecName: Full=Beta-1,4-xylosyltransferase IRX9 {ECO:0000305}; EC=2.4.2.24 {ECO:0000269|PubMed:22080591}; AltName: Full=Protein IRREGULAR XYLEM 9 {ECO:0000303|PubMed:17944810}; AltName: Full=Xylan xylosyltransferase IRX9 {ECO:0000305};	A0A835MBA7_9MAGN RecName: Full=Glycosyltransferases {ECO:0000256|RuleBase:RU363127}; EC=2.4.-.- {ECO:0000256|RuleBase:RU363127};	Beta-1,3-glucuronyltransferase B3GAT1/SQV-8	GO:0005794,Golgi apparatus; GO:0000139,Golgi membrane; GO:0016021,integral component of membrane; GO:0047517,1,4-beta-D-xylan synthase activity; GO:0015018,galactosylgalactosylxylosylprotein 3-beta-glucuronosyltransferase activity; GO:0042285,xylosyltransferase activity; GO:0005975,carbohydrate metabolic process; GO:0071555,cell wall organization; GO:0010417,glucuronoxylan biosynthetic process; G…	PF03360.19:Glycosyltransferase family 43	--	--	--
IFM89_011190	25.8563	15.2644	16.911	5.1325	13.2229	4.6653	499	318	366	116	388	89	-1.40956	0.00110803	0.0205974	down	CM027381.1	3288895	3296285	-	IFM89_011190	--	--	--	hypothetical protein IFM89_011190 [Coptis chinensis]	TA1_ARATH RecName: Full=Transcriptional regulator TAC1; AltName: Full=Protein TELOMERASE ACTIVATOR1;	A0A835HV65_9MAGN SubName: Full=Uncharacterized protein {ECO:0000313|EMBL:KAF9604908.1};	--	GO:0005634,nucleus; GO:0003677,DNA binding; GO:0003700,DNA-binding transcription factor activity; GO:0046872,metal ion binding; GO:0051973,positive regulation of telomerase activity; GO:0006355,regulation of DNA-templated transcription; GO:0003674,molecular_function; GO:0003676,nucleic acid binding; GO:0005488,binding; GO:0097159,organic cyclic compound binding; GO:1901363,heterocyclic compound b…	--	--	--	--
IFM89_003769	13.0127	19.6374	24.7978	8.6025	11.1812	10.1915	124	202	265	96	162	96	-1.02138	0.00112913	0.0209336	down	CM027379.1	89364100	89365282	-	IFM89_003769	--	K17479 glutaredoxin domain-containing cysteine-rich protein 1 | (RefSeq) uncharacterized protein At3g28850 (A)	--	hypothetical protein IFM89_003769 [Coptis chinensis]	Y3885_ARATH RecName: Full=Uncharacterized protein At3g28850;	A0A835M3L4_9MAGN SubName: Full=Uncharacterized protein {ECO:0000313|EMBL:KAF9612759.1};	Glutaredoxin-related protein	GO:0005886,plasma membrane; GO:0097573,glutathione oxidoreductase activity; GO:0003674,molecular_function; GO:0003824,catalytic activity; GO:0015035,protein-disulfide reductase activity; GO:0015036,disulfide oxidoreductase activity; GO:0016491,oxidoreductase activity; GO:0016667,oxidoreductase activity, acting on a sulfur group of donors; GO:0140096,catalytic activity, acting on a protein; GO:000…	PF00462.27:Glutaredoxin	--	--	--
IFM89_035919	116.94	122.236	71.0136	368.529	181.993	148.262	2602	2936	1772	9603	6157	3261	1.0832	0.00114753	0.0212055	up	CM027385.1	41010173	41014212	+	IFM89_035919	--	K08726 soluble epoxide hydrolase / lipid-phosphate phosphatase [EC:3.3.2.10 3.1.3.76] | (RefSeq) uncharacterized protein LOC107492180 (A)	ko00590: Arachidonic acid metabolism; ko01100: Metabolic pathways; ko04146: Peroxisome	hypothetical protein IFM89_035919 [Coptis chinensis]	--	A0A835H107_9MAGN RecName: Full=AB hydrolase-1 domain-containing protein {ECO:0000259|Pfam:PF00561};	Soluble epoxide hydrolase	GO:0003824,catalytic activity; GO:0003674,molecular_function	PF00561.23:alpha/beta hydrolase fold	--	--	--
IFM89_028503	2.5164	1.7317	1.6669	3.6836	6.0055	6.2551	35	26	26	60	127	86	1.35221	0.00120638	0.0221103	up	CM027382.1	96119994	96122506	-	IFM89_028503	--	--	--	hypothetical protein IFM89_028503, partial [Coptis chinensis]	--	A0A835HN55_9MAGN RecName: Full=DUF2439 domain-containing protein {ECO:0000259|Pfam:PF10382}; Flags: Fragment;	Predicted transposase	--	PF10382.12:Protein of unknown function (DUF2439)	--	--	--
IFM89_039005	0.4326	0.5063	0.5787	1.8764	1.1981	0.8408	38	48	57	193	160	73	1.28051	0.00121835	0.0222514	up	CM027379.1	114808230	114814867	+	IFM89_039005	--	K13466 EIX receptor 1/2 | (RefSeq) receptor-like protein EIX2 (A)	ko04626: Plant-pathogen interaction	hypothetical protein IFM89_039005 [Coptis chinensis]	EIX1_SOLLC RecName: Full=Receptor-like protein EIX1 {ECO:0000305}; AltName: Full=EIX receptor 1 {ECO:0000312|EMBL:AAR28377.1}; Flags: Precursor;	A0A835IJQ1_9MAGN RecName: Full=LRRNT_2 domain-containing protein {ECO:0000259|Pfam:PF08263};	FOG: Leucine rich repeat	GO:0016021,integral component of membrane; GO:0005886,plasma membrane; GO:0050832,defense response to fungus; GO:0006950,response to stress; GO:0006952,defense response; GO:0008150,biological_process; GO:0009605,response to external stimulus; GO:0009607,response to biotic stimulus; GO:0009620,response to fungus; GO:0043207,response to external biotic stimulus; GO:0044419,biological process involv…	PF13855.9:Leucine rich repeat	--	--	--
IFM89_002552	15.1618	17.2536	8.1742	3.1559	8.4407	5.7408	521	640	315	127	441	195	-1.30611	0.00121967	0.022256	down	CM027382.1	83228567	83236901	-	IFM89_002552	--	K20523 SH3 domain-containing YSC84-like protein 1 | (RefSeq) uncharacterized LOC100242383 (A)	--	hypothetical protein IFM89_002552 [Coptis chinensis]	--	A0A835HKM7_9MAGN SubName: Full=Uncharacterized protein {ECO:0000313|EMBL:KAF9600079.1};	Uncharacterized conserved protein	--	PF14392.9:Zinc knuckle	--	--	--
IFM89_032681	20.6398	22.8416	39.1254	91.7593	57.0326	38.3616	596	712	1267	3103	2504	1095	1.09265	0.00128556	0.0229956	up	CM027379.1	6717752	6721177	+	IFM89_032681	--	K00307 reticuline oxidase [EC:1.21.3.3] | (RefSeq) reticuline oxidase (A)	ko00950: Isoquinoline alkaloid biosynthesis; ko01100: Metabolic pathways; ko01110: Biosynthesis of secondary metabolites	hypothetical protein IFM89_032681 [Coptis chinensis]	RETO_ESCCA RecName: Full=Reticuline oxidase; EC=1.21.3.3; AltName: Full=Berberine bridge-forming enzyme; Short=BBE; AltName: Full=Tetrahydroprotoberberine synthase; Flags: Precursor;	A0A835IFG7_9MAGN RecName: Full=FAD-binding PCMH-type domain-containing protein {ECO:0000259|PROSITE:PS51387};	--	GO:0031410,cytoplasmic vesicle; GO:0071949,FAD binding; GO:0050468,reticuline oxidase activity; GO:0009820,alkaloid metabolic process; GO:0000166,nucleotide binding; GO:0003674,molecular_function; GO:0005488,binding; GO:0036094,small molecule binding; GO:0043167,ion binding; GO:0043168,anion binding; GO:0050660,flavin adenine dinucleotide binding; GO:0097159,organic cyclic compound binding; GO:19…	PF01565.26:FAD binding domain	--	--	--
IFM89_021655	55.2292	47.5765	104.439	398.457	200.671	159.435	1127	1048	2390	9522	6226	3216	1.78419	0.00129817	0.023168	up	CM027379.1	636704	638052	+	IFM89_021655	--	K13395 (S)-stylopine/(S)-canadine/(S)-nandinine synthase [EC:1.14.19.64 1.14.19.68 1.14.19.73] | (RefSeq) (S)-stylopine synthase 1-like (A)	ko00950: Isoquinoline alkaloid biosynthesis; ko01100: Metabolic pathways; ko01110: Biosynthesis of secondary metabolites	hypothetical protein IFM89_021655 [Coptis chinensis]	C719A_COPJA RecName: Full=(S)-canadine synthase; EC=1.14.19.68 {ECO:0000269|PubMed:12732624}; AltName: Full=(S)-tetrahydrocolumbamine oxidase (methylenedioxy-bridge-forming); AltName: Full=Cytochrome P450 719A1;	A0A835M5Z6_9MAGN SubName: Full=Uncharacterized protein {ECO:0000313|EMBL:KAF9615084.1};	Cytochrome P450 CYP2 subfamily	GO:0005789,endoplasmic reticulum membrane; GO:0016021,integral component of membrane; GO:0043231,intracellular membrane-bounded organelle; GO:0047056,(S)-canadine synthase activity; GO:0020037,heme binding; GO:0005506,iron ion binding; GO:0004497,monooxygenase activity; GO:0033075,isoquinoline alkaloid biosynthetic process; GO:0003674,molecular_function; GO:0003824,catalytic activity; GO:0016491,…	PF00067.25:Cytochrome P450	--	--	--
IFM89_039410	1.0895	1.4418	1.145	3.1232	2.2265	4.0544	28	40	33	94	87	103	1.26394	0.00130935	0.0233211	up	CM027379.1	116333172	116336584	+	IFM89_039410	--	K11985 TRAF-interacting protein [EC:2.3.2.27] | (RefSeq) uncharacterized protein LOC122663956 isoform X1 (A)	--	hypothetical protein IFM89_039410, partial [Coptis chinensis]	--	A0A835ILW1_9MAGN SubName: Full=Uncharacterized protein {ECO:0000313|EMBL:KAF9618013.1};	Predicted E3 ubiquitin ligase	--	--	--	--	--
IFM89_005742	8.2786	3.4318	12.5394	24.0479	17.1052	22.5624	219	98	372	745	688	590	1.30914	0.00132154	0.0234557	up	CM027378.1	102179066	102184955	+	IFM89_005742	--	K00475 naringenin 3-dioxygenase [EC:1.14.11.9] | (RefSeq) naringenin,2-oxoglutarate 3-dioxygenase (A)	ko00941: Flavonoid biosynthesis; ko01100: Metabolic pathways; ko01110: Biosynthesis of secondary metabolites	hypothetical protein IFM89_005742 [Coptis chinensis]	FL3H_PETHY RecName: Full=Naringenin,2-oxoglutarate 3-dioxygenase; EC=1.14.11.9 {ECO:0000250|UniProtKB:Q7XZQ7}; AltName: Full=FHT; AltName: Full=Flavanone-3-hydroxylase; Short=F3H; Flags: Fragment;	A0A835IMA7_9MAGN RecName: Full=Fe2OG dioxygenase domain-containing protein {ECO:0000259|PROSITE:PS51471};	Iron/ascorbate family oxidoreductases	GO:0031418,L-ascorbic acid binding; GO:0046872,metal ion binding; GO:0045486,naringenin 3-dioxygenase activity; GO:0009805,coumarin biosynthetic process; GO:0009813,flavonoid biosynthetic process; GO:0002238,response to molecule of fungal origin; GO:0003674,molecular_function; GO:0005488,binding; GO:0019842,vitamin binding; GO:0030246,carbohydrate binding; GO:0031406,carboxylic acid binding; GO:0…	PF03171.23:2OG-Fe(II) oxygenase superfamily	--	--	--
novel.6072	0.5884	0.6598	1.353	2.6707	5.0305	1.723	19	23	49	101	247	55	1.77605	0.00132408	0.0234633	up	CM027383.1	74080449	74086022	+	--	--	--	--	hypothetical protein FRX31_026101 [Thalictrum thalictroides]	--	A0A7J6VGT3_THATH SubName: Full=Uncharacterized protein {ECO:0000313|EMBL:KAF5184309.1};	--	--	--	--	--	--
novel.8296	12.4262	21.1552	10.1021	8.8024	8.0217	4.3881	487	895	444	404	478	170	-1.12699	0.0013444	0.0237628	down	JADFTS010000033.1	17904	20346	.	--	--	--	--	hypothetical protein AQUCO_03500039v1 [Aquilegia coerulea]	TRA1_MAIZE RecName: Full=Putative AC transposase; AltName: Full=ORFA;	A0A2G5CWS9_AQUCA SubName: Full=Uncharacterized protein {ECO:0000313|EMBL:PIA35387.1};	--	GO:0003677,DNA binding; GO:0046983,protein dimerization activity; GO:0006310,DNA recombination; GO:0032196,transposition; GO:0003674,molecular_function; GO:0003676,nucleic acid binding; GO:0005488,binding; GO:0097159,organic cyclic compound binding; GO:1901363,heterocyclic compound binding; GO:0005515,protein binding; GO:0006139,nucleobase-containing compound metabolic process; GO:0006259,DNA met…	PF17874.4:MalT-like TPR region	--	--	--
IFM89_021674	504.119	1145.79	795.268	221.135	444.531	284.209	35495	87087	62795	18234	47589	19781	-1.44652	0.00136278	0.0239862	down	CM027379.1	723490	736522	+	IFM89_021674	--	K12309 beta-galactosidase [EC:3.2.1.23] | (RefSeq) beta-galactosidase 2 (A)	ko00052: Galactose metabolism; ko00511: Other glycan degradation; ko00531: Glycosaminoglycan degradation; ko00600: Sphingolipid metabolism; ko00604: Glycosphingolipid biosynthesis - ganglio series; ko01100: Metabolic pathways	hypothetical protein IFM89_021674 [Coptis chinensis]	BGAL1_ARATH RecName: Full=Beta-galactosidase 1; Short=Lactase 1; EC=3.2.1.23; Flags: Precursor;	A0A835IG37_9MAGN RecName: Full=Beta-galactosidase {ECO:0000256|ARBA:ARBA00012756, ECO:0000256|RuleBase:RU000675}; EC=3.2.1.23 {ECO:0000256|ARBA:ARBA00012756, ECO:0000256|RuleBase:RU000675};	Beta-galactosidase	GO:0048046,apoplast; GO:0005829,cytosol; GO:0009505,plant-type cell wall; GO:0009506,plasmodesma; GO:0005773,vacuole; GO:0004565,beta-galactosidase activity; GO:0030246,carbohydrate binding; GO:0005975,carbohydrate metabolic process; GO:0003674,molecular_function; GO:0003824,catalytic activity; GO:0004553,hydrolase activity, hydrolyzing O-glycosyl compounds; GO:0015925,galactosidase activity; GO:…	PF01301.22:Glycosyl hydrolases family 35	--	--	--
IFM89_032939	0.6188	1.5635	1.2542	2.6902	3.6632	4.61	11	30	25	56	99	81	1.58462	0.00137044	0.0240239	up	CM027380.1	18257635	18264030	+	IFM89_032939	--	K01802 peptidylprolyl isomerase [EC:5.2.1.8] | (RefSeq) photosynthetic NDH subunit of lumenal location 4, chloroplastic isoform X1 (A)	--	hypothetical protein IFM89_032939 [Coptis chinensis]	PNSL4_ARATH RecName: Full=Photosynthetic NDH subunit of lumenal location 4, chloroplastic {ECO:0000303|PubMed:21785130}; AltName: Full=FK506-binding protein 16-2; Short=AtFKBP16-2; AltName: Full=Immunophilin FKBP16-2; AltName: Full=Peptidyl-prolyl cis-trans isomerase FKBP16-2; Short=PPIase FKBP16-2; EC=5.2.1.8; AltName: Full=Rotamase; Flags: Precursor;	A0A835I6X5_9MAGN RecName: Full=Peptidylprolyl isomerase {ECO:0000256|PROSITE-ProRule:PRU00277}; EC=5.2.1.8 {ECO:0000256|PROSITE-ProRule:PRU00277};	FKBP-type peptidyl-prolyl cis-trans isomerase	GO:0009507,chloroplast; GO:0009543,chloroplast thylakoid lumen; GO:0009535,chloroplast thylakoid membrane; GO:0005886,plasma membrane; GO:0009579,thylakoid; GO:0003755,peptidyl-prolyl cis-trans isomerase activity; GO:0003674,molecular_function; GO:0003824,catalytic activity; GO:0016853,isomerase activity; GO:0016859,cis-trans isomerase activity; GO:0140096,catalytic activity, acting on a protein;…	PF00254.31:FKBP-type peptidyl-prolyl cis-trans isomerase	--	--	--
IFM89_012170	8.581	8.4603	14.9756	32.9208	18.826	19.3459	140	149	274	629	467	312	1.06327	0.00137179	0.0240239	up	CM027383.1	37937955	37940091	-	IFM89_012170	--	K08235 xyloglucan:xyloglucosyl transferase [EC:2.4.1.207] | (RefSeq) probable xyloglucan endotransglucosylase/hydrolase protein 32 (A)	--	hypothetical protein IFM89_012170 [Coptis chinensis]	XTH32_ARATH RecName: Full=Probable xyloglucan endotransglucosylase/hydrolase protein 32; Short=At-XTH32; Short=XTH-32; EC=2.4.1.207; Flags: Precursor;	A0A835H9Z9_9MAGN RecName: Full=Xyloglucan endotransglucosylase/hydrolase {ECO:0000256|RuleBase:RU361120}; EC=2.4.1.207 {ECO:0000256|RuleBase:RU361120};	--	GO:0048046,apoplast; GO:0004553,hydrolase activity, hydrolyzing O-glycosyl compounds; GO:0030247,polysaccharide binding; GO:0016762,xyloglucan:xyloglucosyl transferase activity; GO:0042546,cell wall biogenesis; GO:0016998,cell wall macromolecule catabolic process; GO:0071555,cell wall organization; GO:0010411,xyloglucan metabolic process; GO:0003674,molecular_function; GO:0003824,catalytic activi…	PF00722.24:Glycosyl hydrolases family 16	--	--	--
IFM89_026968	1.1576	1.8974	1.6146	4.1062	4.1388	2.5524	39	69	61	162	212	85	1.12576	0.00140735	0.0244814	up	CM027380.1	106477655	106489296	-	IFM89_026968	--	K05749 cytoplasmic FMR1 interacting protein | (RefSeq) protein PIR (A)	--	hypothetical protein IFM89_026968 [Coptis chinensis]	PIR_ARATH RecName: Full=Protein PIR; AltName: Full=PIR of plants; AltName: Full=Protein KLUNKER; Short=AtSRA1; AltName: Full=Protein PIROGI;	A0A835I5R0_9MAGN SubName: Full=Uncharacterized protein {ECO:0000313|EMBL:KAF9611084.1};	Mitochondrial chaperonin, Cpn60/Hsp60p	GO:0031209,SCAR complex; GO:0000340,RNA 7-methylguanosine cap binding; GO:0031267,small GTPase binding; GO:0030036,actin cytoskeleton organization; GO:0045010,actin nucleation; GO:0000902,cell morphogenesis; GO:0030833,regulation of actin filament polymerization; GO:0006417,regulation of translation; GO:0010090,trichome morphogenesis; GO:0000339,RNA cap binding; GO:0003674,molecular_function; GO:…	PF05994.14:Cytoplasmic Fragile-X interacting family	--	--	--
IFM89_016841	12.1952	16.9984	10.3695	4.1267	7.698	8.3265	323	486	308	128	310	218	-1.05524	0.00141263	0.0245398	down	CM027385.1	78529404	78531263	+	IFM89_016841	--	K13229 2,4-dihydroxy-1,4-benzoxazin-3-one-glucoside dioxygenase [EC:1.14.11.59] | (RefSeq) DIBOA-glucoside dioxygenase BX6 (A)	ko00402: Benzoxazinoid biosynthesis; ko01110: Biosynthesis of secondary metabolites	hypothetical protein IFM89_016841 [Coptis chinensis]	ACCH3_ARATH RecName: Full=1-aminocyclopropane-1-carboxylate oxidase homolog 3;	A0A835LB47_9MAGN RecName: Full=Fe2OG dioxygenase domain-containing protein {ECO:0000259|PROSITE:PS51471};	Iron/ascorbate family oxidoreductases	GO:0005576,extracellular region; GO:0046872,metal ion binding; GO:0016491,oxidoreductase activity; GO:0003674,molecular_function; GO:0005488,binding; GO:0043167,ion binding; GO:0043169,cation binding; GO:0003824,catalytic activity; GO:0005575,cellular_component; GO:0110165,cellular anatomical entity	PF14226.9:non-haem dioxygenase in morphine synthesis N-terminal	--	--	--
IFM89_031558	0.6623	0.6135	0.4183	4.8539	3.0853	0.5862	24	24	17	206	170	21	2.24554	0.00141307	0.0245398	up	CM027382.1	23074949	23077207	+	IFM89_031558	--	K15333 tRNA guanosine-2'-O-methyltransferase [EC:2.1.1.34] | (RefSeq) uncharacterized protein LOC104224633 (A)	--	hypothetical protein IFM89_031558 [Coptis chinensis]	SBT3_SOLLC RecName: Full=Subtilisin-like protease SBT3 {ECO:0000303|PubMed:27259555}; EC=3.4.21.- {ECO:0000269|PubMed:19332543, ECO:0000269|PubMed:19407393, ECO:0000269|PubMed:19805099, ECO:0000269|PubMed:27259555, ECO:0000269|PubMed:27451395}; AltName: Full=LeSBT3 {ECO:0000303|PubMed:10350089}; AltName: Full=SlSBT3 {ECO:0000303|PubMed:19332543}; AltName: Full=Subtilase 3 {ECO:0000303|PubMed:1933…	A0A835HNQ9_9MAGN SubName: Full=Uncharacterized protein {ECO:0000313|EMBL:KAF9602789.1};	--	GO:0005615,extracellular space; GO:0042802,identical protein binding; GO:0042803,protein homodimerization activity; GO:0004252,serine-type endopeptidase activity; GO:0008236,serine-type peptidase activity; GO:0006952,defense response; GO:0043171,peptide catabolic process; GO:0009827,plant-type cell wall modification; GO:1900367,positive regulation of defense response to insect; GO:0010628,positiv…	PF00082.25:Subtilase family	--	--	--
IFM89_008182	2.5151	3.472	5.4529	7.9589	14.9201	7.4335	51	76	124	189	460	149	1.32439	0.00142675	0.0247158	up	CM027380.1	14085155	14086883	+	IFM89_008182	--	--	--	hypothetical protein IFM89_008182 [Coptis chinensis]	STR6_ARATH RecName: Full=Rhodanese-like domain-containing protein 6; AltName: Full=Sulfurtransferase 6; Short=AtStr6;	A0A835LX38_9MAGN RecName: Full=FSH1 domain-containing protein {ECO:0000259|Pfam:PF03959};	Phospholipase/carboxyhydrolase	GO:0005737,cytoplasm; GO:0005634,nucleus; GO:0016787,hydrolase activity; GO:0003674,molecular_function; GO:0003824,catalytic activity; GO:0005575,cellular_component; GO:0005622,intracellular anatomical structure; GO:0110165,cellular anatomical entity; GO:0043226,organelle; GO:0043227,membrane-bounded organelle; GO:0043229,intracellular organelle; GO:0043231,intracellular membrane-bounded organelle	PF03959.16:Serine hydrolase (FSH1)	--	--	--
novel.840	6.2708	5.1811	5.0476	1.8814	3.2994	3.4976	185	165	167	65	148	102	-1.0081	0.00143437	0.0248065	down	CM027378.1	11114809	11120190	-	--	--	K00555 tRNA (guanine26-N2/guanine27-N2)-dimethyltransferase [EC:2.1.1.215 2.1.1.216] | (GenBank) N(2),N(2)-dimethylguanosine tRNA methyltransferase, putative (A)	--	hypothetical protein L6452_19816 [Arctium lappa]	TRM2_ARATH RecName: Full=Probable tRNA (guanine(26)-N(2))-dimethyltransferase 2; EC=2.1.1.216; AltName: Full=tRNA 2,2-dimethylguanosine-26 methyltransferase 2; AltName: Full=tRNA(guanine-26,N(2)-N(2)) methyltransferase 2; AltName: Full=tRNA(m(2,2)G26)dimethyltransferase 2;	A0A5K1BSZ7_9MAGN SubName: Full=Uncharacterized protein {ECO:0000313|EMBL:VVW14846.1}; Flags: Fragment;	tRNA methyltransferase	GO:0005634,nucleus; GO:0004809,tRNA (guanine-N2-)-methyltransferase activity; GO:0000049,tRNA binding; GO:0006400,tRNA modification; GO:0002940,tRNA N2-guanine methylation; GO:0003674,molecular_function; GO:0003824,catalytic activity; GO:0008168,methyltransferase activity; GO:0008170,N-methyltransferase activity; GO:0008173,RNA methyltransferase activity; GO:0008175,tRNA methyltransferase activit…	PF02005.19:N2,N2-dimethylguanosine tRNA methyltransferase	--	--	--
IFM89_018664	2.9369	2.8567	3.339	1.9122	1.2314	1.6341	80	84	102	61	51	44	-1.02732	0.00148151	0.0253694	down	CM027380.1	104434342	104437373	-	IFM89_018664	--	K03283 heat shock 70kDa protein 1/2/6/8 | (RefSeq) heat shock cognate 70 kDa protein 2-like (A)	ko03040: Spliceosome; ko04141: Protein processing in endoplasmic reticulum; ko04144: Endocytosis	hypothetical protein IFM89_018664 [Coptis chinensis]	HSP72_SOLLC RecName: Full=Heat shock cognate 70 kDa protein 2;	A0A835I180_9MAGN SubName: Full=Uncharacterized protein {ECO:0000313|EMBL:KAF9609810.1};	Molecular chaperones HSP70/HSC70, HSP70 superfamily	GO:0005737,cytoplasm; GO:0005524,ATP binding; GO:0016887,ATP hydrolysis activity; GO:0140662,ATP-dependent protein folding chaperone; GO:0031072,heat shock protein binding; GO:0051787,misfolded protein binding; GO:0044183,protein folding chaperone; GO:0051082,unfolded protein binding; GO:0034620,cellular response to unfolded protein; GO:0051085,chaperone cofactor-dependent protein refolding; GO:0…	PF00012.23:Hsp70 protein	--	--	--
IFM89_016471	2.1724	2.6941	2.7495	6.762	3.7103	5.9905	62	83	88	226	161	169	1.02178	0.00148779	0.0254322	up	CM027380.1	89804540	89808255	+	IFM89_016471	--	--	--	hypothetical protein IFM89_016471 [Coptis chinensis]	CHUP1_ARATH RecName: Full=Protein CHUP1, chloroplastic; AltName: Full=Protein CHLOROPLAST UNUSUAL POSITIONING 1;	A0A835LYA7_9MAGN SubName: Full=Uncharacterized protein {ECO:0000313|EMBL:KAF9609472.1};	--	GO:0009507,chloroplast; GO:0009707,chloroplast outer membrane; GO:0005829,cytosol; GO:0009658,chloroplast organization; GO:0009902,chloroplast relocation; GO:0006996,organelle organization; GO:0008150,biological_process; GO:0009657,plastid organization; GO:0009987,cellular process; GO:0016043,cellular component organization; GO:0071840,cellular component organization or biogenesis; GO:0019750,chl…	PF08614.14:Autophagy protein 16 (ATG16)	--	--	--
IFM89_017974	6.1994	5.0488	2.1869	1.3961	1.613	1.654	91	80	36	24	36	24	-1.60825	0.00150438	0.0256556	down	CM027381.1	93219798	93227332	+	IFM89_017974	--	K00924 kinase [EC:2.7.1.-] | (RefSeq) receptor protein kinase TMK1 (A)	--	hypothetical protein IFM89_017974 [Coptis chinensis]	PR5K_ARATH RecName: Full=PR5-like receptor kinase {ECO:0000303|PubMed:8637920}; EC=2.7.11.1 {ECO:0000269|PubMed:8637920}; Flags: Precursor;	A0A835HVR9_9MAGN RecName: Full=Protein kinase domain-containing protein {ECO:0000259|PROSITE:PS50011};	Serine/threonine protein kinase	GO:0016021,integral component of membrane; GO:0009506,plasmodesma; GO:0005524,ATP binding; GO:0004672,protein kinase activity; GO:0106310,protein serine kinase activity; GO:0004675,transmembrane receptor protein serine/threonine kinase activity; GO:0006468,protein phosphorylation; GO:0009620,response to fungus; GO:0000166,nucleotide binding; GO:0003674,molecular_function; GO:0005488,binding; GO:0…	PF07714.20:Protein tyrosine and serine/threonine kinase	--	--	--
IFM89_001004	1.937	2.6915	1.8842	6.0145	5.559	4.5425	22	33	24	80	96	51	1.22424	0.00155167	0.0263116	up	CM027378.1	75228705	75230978	+	IFM89_001004	--	--	--	hypothetical protein IFM89_001004 [Coptis chinensis]	--	A0A835M955_9MAGN SubName: Full=Uncharacterized protein {ECO:0000313|EMBL:KAF9618369.1};	Predicted E3 ubiquitin ligase	--	--	--	--	--
IFM89_033036	15.1975	37.7093	45.0764	169.103	102.696	68.621	423	1133	1407	5512	4346	1888	1.70861	0.00157786	0.0266219	up	CM027379.1	1371509	1375125	-	IFM89_033036	--	K13384 (RS)-1-benzyl-1,2,3,4-tetrahydroisoquinoline N-methyltransferase [EC:2.1.1.115 2.1.1.140] | (RefSeq) (S)-coclaurine N-methyltransferase (A)	ko00950: Isoquinoline alkaloid biosynthesis; ko01100: Metabolic pathways; ko01110: Biosynthesis of secondary metabolites	hypothetical protein IFM89_033036 [Coptis chinensis]	CNMT_THLFG RecName: Full=(S)-coclaurine N-methyltransferase; Short=TfCNMT; EC=2.1.1.140;	A0A835IFQ5_9MAGN SubName: Full=Uncharacterized protein {ECO:0000313|EMBL:KAF9616966.1};	--	GO:0005737,cytoplasm; GO:0030794,(S)-coclaurine-N-methyltransferase activity; GO:0032259,methylation; GO:0003674,molecular_function; GO:0003824,catalytic activity; GO:0008168,methyltransferase activity; GO:0008757,S-adenosylmethionine-dependent methyltransferase activity; GO:0016740,transferase activity; GO:0016741,transferase activity, transferring one-carbon groups; GO:0008150,biological_proces…	PF02353.23:Mycolic acid cyclopropane synthetase	--	--	--
IFM89_016964	19.9792	24.9243	42.401	7.2791	8.7602	18.5946	150	202	357	64	100	138	-1.42109	0.0015913	0.0267014	down	CM027381.1	78276079	78278323	+	IFM89_016964	--	--	--	hypothetical protein IFM89_016964 [Coptis chinensis]	--	A0A835HVY6_9MAGN SubName: Full=Uncharacterized protein {ECO:0000313|EMBL:KAF9605387.1};	--	GO:0016021,integral component of membrane; GO:0005575,cellular_component; GO:0016020,membrane; GO:0031224,intrinsic component of membrane; GO:0110165,cellular anatomical entity	--	--	--	--
IFM89_019657	16.4742	29.9727	25.9395	68.0559	37.1909	49.2469	111	218	196	537	381	328	1.00501	0.00160404	0.0268421	up	CM027380.1	106351960	106352794	-	IFM89_019657	--	K00679 phospholipid:diacylglycerol acyltransferase [EC:2.3.1.158] | (RefSeq) hypothetical protein (A)	ko00561: Glycerolipid metabolism; ko01100: Metabolic pathways	hypothetical protein IFM89_019657 [Coptis chinensis]	LTL1_ARATH RecName: Full=GDSL esterase/lipase LTL1; EC=3.1.1.-; AltName: Full=Extracellular lipase LTL1; AltName: Full=Lithium-tolerant lipase 1; Short=AtLTL1; Short=Li-tolerant lipase 1; Flags: Precursor;	A0A835I5G8_9MAGN SubName: Full=Uncharacterized protein {ECO:0000313|EMBL:KAF9610017.1};	--	GO:0005576,extracellular region; GO:0016788,hydrolase activity, acting on ester bonds; GO:0042538,hyperosmotic salinity response; GO:0016042,lipid catabolic process; GO:0010226,response to lithium ion; GO:0009751,response to salicylic acid; GO:0003674,molecular_function; GO:0003824,catalytic activity; GO:0016787,hydrolase activity; GO:0006950,response to stress; GO:0006970,response to osmotic str…	PF00657.25:GDSL-like Lipase/Acylhydrolase	--	--	--
IFM89_016544	81.8092	162.767	135.512	383.064	170.453	258.573	941	2021	1748	5160	2981	2940	1.00733	0.00161189	0.0269384	up	CM027379.1	112094661	112095377	+	IFM89_016544	--	K11855 ubiquitin carboxyl-terminal hydrolase 36/42 [EC:3.4.19.12] | (RefSeq) ubiquitin carboxyl-terminal hydrolase 36 (A)	--	hypothetical protein IFM89_016544 [Coptis chinensis]	PRF1_SOLLC RecName: Full=36.4 kDa proline-rich protein;	A0A835ICL0_9MAGN RecName: Full=Hydrophob_seed domain-containing protein {ECO:0000259|Pfam:PF14547};	--	--	PF14547.9:Hydrophobic seed protein	--	--	--
IFM89_003489	33.2432	25.5189	64.0499	205.713	121.957	92.7833	1033	856	2232	7486	5762	2850	1.6887	0.00161445	0.0269596	up	CM027383.1	95578476	95581188	+	IFM89_003489	--	K12153 phenylalanine N-monooxygenase [EC:1.14.14.40] | (RefSeq) tryptophan N-monooxygenase CYP79A68-like (A)	ko00460: Cyanoamino acid metabolism; ko00966: Glucosinolate biosynthesis; ko01100: Metabolic pathways; ko01110: Biosynthesis of secondary metabolites; ko01210: 2-Oxocarboxylic acid metabolism	hypothetical protein IFM89_003489 [Coptis chinensis]	C79A1_SORBI RecName: Full=Tyrosine N-monooxygenase; EC=1.14.14.36 {ECO:0000269|PubMed:7937883}; AltName: Full=Cytochrome P450 79A1; AltName: Full=Cytochrome P450Tyr;	A0A835LKF1_9MAGN SubName: Full=Uncharacterized protein {ECO:0000313|EMBL:KAF9595747.1};	Cytochrome P450 CYP2 subfamily	GO:0005789,endoplasmic reticulum membrane; GO:0016021,integral component of membrane; GO:0020037,heme binding; GO:0005506,iron ion binding; GO:0004497,monooxygenase activity; GO:0016705,oxidoreductase activity, acting on paired donors, with incorporation or reduction of molecular oxygen; GO:0010132,dhurrin biosynthetic process; GO:0003674,molecular_function; GO:0005488,binding; GO:0046906,tetrapy…	PF00067.25:Cytochrome P450	--	--	--
IFM89_010163	1.1922	1.3805	1.215	3.7812	2.5484	2.6275	28	35	32	104	91	61	1.15466	0.00167465	0.0276331	up	CM027379.1	20718779	20720242	+	IFM89_010163	--	K10663 E3 ubiquitin-protein ligase ATL4 [EC:2.3.2.27] | (RefSeq) putative RING-H2 finger protein ATL49 (A)	--	hypothetical protein IFM89_010163 [Coptis chinensis]	ATL13_ARATH RecName: Full=RING-H2 finger protein ATL13; EC=2.3.2.27 {ECO:0000305}; AltName: Full=RING-type E3 ubiquitin transferase ATL13 {ECO:0000305};	A0A835M7N5_9MAGN RecName: Full=RING-type domain-containing protein {ECO:0000259|PROSITE:PS50089};	FOG: Predicted E3 ubiquitin ligase	GO:0016021,integral component of membrane; GO:0005886,plasma membrane; GO:0046872,metal ion binding; GO:0016740,transferase activity; GO:0031625,ubiquitin protein ligase binding; GO:0016567,protein ubiquitination; GO:0003674,molecular_function; GO:0005488,binding; GO:0043167,ion binding; GO:0043169,cation binding; GO:0003824,catalytic activity; GO:0005515,protein binding; GO:0019899,enzyme bindin…	PF13639.9:Ring finger domain	--	--	--
IFM89_019902	0.6821	0.7021	1.0137	2.4592	2.4175	1.61	18	20	30	76	97	42	1.35256	0.00167922	0.0276866	up	CM027380.1	107046715	107050734	-	IFM89_019902	--	K22390 acid phosphatase type 7 | (RefSeq) purple acid phosphatase 15-like (A)	--	hypothetical protein IFM89_019902 [Coptis chinensis]	PPA15_ARATH RecName: Full=Purple acid phosphatase 15; EC=3.1.3.-; EC=3.1.3.2; AltName: Full=Phytase; Flags: Precursor;	A0A835I5J7_9MAGN RecName: Full=Purple acid phosphatase {ECO:0000256|RuleBase:RU361203}; EC=3.1.3.2 {ECO:0000256|RuleBase:RU361203};	Purple acid phosphatase	GO:0005576,extracellular region; GO:0008707,4-phytase activity; GO:0003993,acid phosphatase activity; GO:0046872,metal ion binding; GO:0009846,pollen germination; GO:0009845,seed germination; GO:0003674,molecular_function; GO:0003824,catalytic activity; GO:0016787,hydrolase activity; GO:0016788,hydrolase activity, acting on ester bonds; GO:0016791,phosphatase activity; GO:0042578,phosphoric ester…	PF00149.31:Calcineurin-like phosphoesterase	--	--	--
IFM89_006139	28.896	40.2218	84.0741	164.199	87.3348	118.134	388	583	1266	2582	1783	1568	1.18421	0.00173057	0.0283094	up	CM027385.1	79882690	79883617	+	IFM89_006139	--	K13258 2-hydroxyisoflavanone dehydratase [EC:4.2.1.105] | (RefSeq) 2-hydroxyisoflavanone dehydratase (A)	ko00943: Isoflavonoid biosynthesis; ko01100: Metabolic pathways; ko01110: Biosynthesis of secondary metabolites	hypothetical protein IFM89_006139 [Coptis chinensis]	CXE13_ARATH RecName: Full=Probable carboxylesterase 13; AltName: Full=AtCXE13; EC=3.1.1.1;	A0A835GUN1_9MAGN SubName: Full=Uncharacterized protein {ECO:0000313|EMBL:KAF9587885.1};	Arylacetamide deacetylase	GO:0005829,cytosol; GO:0016787,hydrolase activity; GO:0080030,methyl indole-3-acetate esterase activity; GO:0003674,molecular_function; GO:0003824,catalytic activity; GO:0016788,hydrolase activity, acting on ester bonds; GO:0052689,carboxylic ester hydrolase activity; GO:0005575,cellular_component; GO:0005622,intracellular anatomical structure; GO:0005737,cytoplasm; GO:0110165,cellular anatomical…	PF07859.16:alpha/beta hydrolase fold	--	--	--
IFM89_037272	6.2596	2.8188	3.3335	10.7644	8.0623	13.3684	72	35	43	145	141	152	1.29227	0.00177311	0.0288469	up	CM027380.1	48369295	48370943	-	IFM89_037272	--	K03255 protein TIF31 | (RefSeq) protein TSS (A)	--	hypothetical protein IFM89_037272 [Coptis chinensis]	REC2_ARATH RecName: Full=Protein REDUCED CHLOROPLAST COVERAGE 2 {ECO:0000303|PubMed:26862170}; AltName: Full=Protein TPR-domain suppressor of STIMPY {ECO:0000303|PubMed:21185286};	A0A835I7U9_9MAGN SubName: Full=Uncharacterized protein {ECO:0000313|EMBL:KAF9611989.1};	Uncharacterized protein CLU1/cluA/TIF31 involved in mitochondrial morphology/distribution, also found associated with eIF-3	GO:0005737,cytoplasm; GO:0005829,cytosol; GO:0005634,nucleus; GO:0005886,plasma membrane; GO:0003729,mRNA binding; GO:0007049,cell cycle; GO:0019750,chloroplast localization; GO:0006996,organelle organization; GO:0003674,molecular_function; GO:0003676,nucleic acid binding; GO:0003723,RNA binding; GO:0005488,binding; GO:0097159,organic cyclic compound binding; GO:1901363,heterocyclic compound bind…	--	--	--	--
IFM89_036790	4.4219	4.691	2.6711	15.3472	2.8614	43.7957	62	71	42	252	61	607	2.3119	0.00177526	0.0288594	up	CM027382.1	36501320	36502276	+	IFM89_036790	--	K03248 translation initiation factor 3 subunit G | (RefSeq) eukaryotic translation initiation factor 3 subunit G-like (A)	--	hypothetical protein IFM89_036790 [Coptis chinensis]	--	A0A835LSS0_9MAGN RecName: Full=RRM domain-containing protein {ECO:0000259|PROSITE:PS50102};	Translation initiation factor 3, subunit g (eIF-3g)	GO:0003723,RNA binding; GO:0003674,molecular_function; GO:0003676,nucleic acid binding; GO:0005488,binding; GO:0097159,organic cyclic compound binding; GO:1901363,heterocyclic compound binding	PF00076.25:RNA recognition motif. (a.k.a. RRM, RBD, or RNP domain)	--	--	--
IFM89_017600	5.5866	7.2636	8.0405	40.3395	13.7949	11.3032	57	80	92	482	214	114	1.55627	0.00182061	0.0294196	up	CM027385.1	82808215	82809255	+	IFM89_017600	--	K00799 glutathione S-transferase [EC:2.5.1.18] | (RefSeq) glutathione S-transferase F10-like (A)	ko00480: Glutathione metabolism; ko01100: Metabolic pathways	hypothetical protein IFM89_017600 [Coptis chinensis]	GSTF9_ARATH RecName: Full=Glutathione S-transferase F9 {ECO:0000303|PubMed:12090627}; Short=AtGSTF9 {ECO:0000303|PubMed:12090627}; EC=2.5.1.18 {ECO:0000269|PubMed:12090627, ECO:0000269|PubMed:16538523}; AltName: Full=AtGSTF7 {ECO:0000303|PubMed:12090627}; AltName: Full=GST class-phi member 9 {ECO:0000303|PubMed:12090627, ECO:0000303|PubMed:29732642};	A0A835GXX8_9MAGN RecName: Full=Glutathione transferase {ECO:0000256|ARBA:ARBA00012452}; EC=2.5.1.18 {ECO:0000256|ARBA:ARBA00012452};	Glutathione S-transferase	GO:0048046,apoplast; GO:0009507,chloroplast; GO:0009570,chloroplast stroma; GO:0005737,cytoplasm; GO:0005829,cytosol; GO:0005777,peroxisome; GO:0000325,plant-type vacuole; GO:0005886,plasma membrane; GO:0009506,plasmodesma; GO:0009579,thylakoid; GO:0005507,copper ion binding; GO:0043295,glutathione binding; GO:0004602,glutathione peroxidase activity; GO:0004364,glutathione transferase activity; G…	PF02798.23:Glutathione S-transferase, N-terminal domain	--	--	--
novel.1568	1.4637	0.9118	1.3052	2.823	2.0748	5.004	58	39	58	131	125	196	1.34151	0.00184277	0.0297022	up	CM027378.1	98196339	98198898	+	--	--	K11878 proteasome assembly chaperone 4 | (RefSeq) uncharacterized protein LOC113312884 (A)	--	hypothetical protein IFM89_013902 [Coptis chinensis]	ULT1_ARATH RecName: Full=Protein ULTRAPETALA 1 {ECO:0000303|PubMed:15673576};	A0A835HE94_9MAGN SubName: Full=Uncharacterized protein {ECO:0000313|EMBL:KAF9596854.1};	Cytosine deaminase FCY1 and related enzymes	GO:0005829,cytosol; GO:0005634,nucleus; GO:0003677,DNA binding; GO:0046872,metal ion binding; GO:0009910,negative regulation of flower development; GO:0009909,regulation of flower development; GO:1905435,regulation of histone H3-K4 trimethylation; GO:1901000,regulation of response to salt stress; GO:0003674,molecular_function; GO:0003676,nucleic acid binding; GO:0005488,binding; GO:0097159,organi…	PF16093.8:Proteasome assembly chaperone 4	--	--	--
IFM89_030751	2.2585	2.3911	2.129	15.9243	8.955	2.3501	35	40	37	289	211	36	1.91823	0.00185828	0.0297225	up	CM027377.1	4816726	4818332	+	IFM89_030751	--	--	--	hypothetical protein IFM89_030751 [Coptis chinensis]	Y3136_ARATH RecName: Full=Clavaminate synthase-like protein At3g21360; EC=1.-.-.-;	A0A835J2U7_9MAGN RecName: Full=TauD domain-containing protein {ECO:0000259|Pfam:PF02668};	--	GO:0005829,cytosol; GO:0005634,nucleus; GO:0046872,metal ion binding; GO:0016491,oxidoreductase activity; GO:0003674,molecular_function; GO:0005488,binding; GO:0043167,ion binding; GO:0043169,cation binding; GO:0003824,catalytic activity; GO:0005575,cellular_component; GO:0005622,intracellular anatomical structure; GO:0005737,cytoplasm; GO:0110165,cellular anatomical entity; GO:0043226,organelle;…	PF02668.19:Taurine catabolism dioxygenase TauD, TfdA family	--	--	--
IFM89_005798	2.7668	4.6237	3.9185	11.5814	14.2369	4.9394	51	92	81	250	399	90	1.36035	0.00187091	0.0298559	up	CM027378.1	101350318	101354535	+	IFM89_005798	--	K16290 xylem cysteine proteinase [EC:3.4.22.-] | (RefSeq) cysteine protease XCP1-like (A)	--	hypothetical protein IFM89_005798 [Coptis chinensis]	XCP1_ARATH RecName: Full=Cysteine protease XCP1 {ECO:0000305}; EC=3.4.22.-; AltName: Full=Xylem cysteine peptidase 1 {ECO:0000303|PubMed:10889267}; Short=AtXCP1 {ECO:0000303|PubMed:10889267}; Flags: Precursor;	A0A835IL77_9MAGN SubName: Full=Uncharacterized protein {ECO:0000313|EMBL:KAF9619244.1};	Cysteine proteinase Cathepsin L	GO:0005615,extracellular space; GO:0005764,lysosome; GO:0005634,nucleus; GO:0000325,plant-type vacuole; GO:0005886,plasma membrane; GO:0004197,cysteine-type endopeptidase activity; GO:0010623,programmed cell death involved in cell development; GO:0051603,proteolysis involved in protein catabolic process; GO:0003674,molecular_function; GO:0003824,catalytic activity; GO:0004175,endopeptidase activi…	PF00112.26:Papain family cysteine protease	--	--	--
IFM89_018529	2.0376	1.6778	2.6917	5.2197	4.6656	5.115	27	24	40	81	94	67	1.13992	0.00188201	0.0299871	up	CM027381.1	92160752	92162400	+	IFM89_018529	--	K09422 transcription factor MYB, plant | (RefSeq) transcription factor LAF1-like (A)	--	hypothetical protein IFM89_018529 [Coptis chinensis]	LAF1_ARATH RecName: Full=Transcription factor LAF1 {ECO:0000303|PubMed:11581165}; AltName: Full=Myb-related protein 18 {ECO:0000303|PubMed:9839469}; Short=AtMYB18 {ECO:0000303|PubMed:9839469}; AltName: Full=Protein LONG AFTER FAR-RED LIGHT 1 {ECO:0000303|PubMed:11581165};	A0A835HX49_9MAGN SubName: Full=Uncharacterized protein {ECO:0000313|EMBL:KAF9605802.1};	Transcription factor, Myb superfamily	GO:0016607,nuclear speck; GO:0005634,nucleus; GO:0003677,DNA binding; GO:0003700,DNA-binding transcription factor activity; GO:0010018,far-red light signaling pathway; GO:0045893,positive regulation of DNA-templated transcription; GO:0009585,red, far-red light phototransduction; GO:0009639,response to red or far red light; GO:0003674,molecular_function; GO:0003676,nucleic acid binding; GO:0005488…	PF00249.34:Myb-like DNA-binding domain	MYB	TF	MYB->MYB
novel.4436	1.6104	0.9635	0.4188	3.0367	3.1554	3.0546	48	31	14	106	143	90	1.54967	0.00189924	0.0301694	up	CM027381.1	84305851	84307893	+	--	--	K17604 zinc finger SWIM domain-containing protein 3 | (RefSeq) protein FAR1-RELATED SEQUENCE 1-like (A)	--	protein FAR1-RELATED SEQUENCE 1-like [Asparagus officinalis]	FAR1_ARATH RecName: Full=Protein FAR-RED IMPAIRED RESPONSE 1;	A0A2G5CKK0_AQUCA RecName: Full=Protein FAR1-RELATED SEQUENCE {ECO:0000256|RuleBase:RU367018};	--	GO:0005634,nucleus; GO:0003700,DNA-binding transcription factor activity; GO:0008270,zinc ion binding; GO:0010018,far-red light signaling pathway; GO:1900056,negative regulation of leaf senescence; GO:0042753,positive regulation of circadian rhythm; GO:0045893,positive regulation of DNA-templated transcription; GO:0010017,red or far-red light signaling pathway; GO:0010218,response to far red ligh…	PF04434.20:SWIM zinc finger	--	--	--
IFM89_017356	1.0015	0.7678	0.7699	3.0964	3.3162	1.2926	29	24	25	105	146	37	1.52366	0.0019108	0.0303068	up	CM027384.1	89687610	89692222	+	IFM89_017356	--	K16297 serine carboxypeptidase-like clade II [EC:3.4.16.-] | (RefSeq) serine carboxypeptidase-like 40 (A)	--	hypothetical protein IFM89_017356 [Coptis chinensis]	SCP40_ARATH RecName: Full=Serine carboxypeptidase-like 40; EC=3.4.16.-; Flags: Precursor;	A0A835H3Y3_9MAGN RecName: Full=Carboxypeptidase {ECO:0000256|RuleBase:RU361156}; EC=3.4.16.- {ECO:0000256|RuleBase:RU361156};	Serine carboxypeptidases (lysosomal cathepsin A)	GO:0005576,extracellular region; GO:0004185,serine-type carboxypeptidase activity; GO:0006508,proteolysis; GO:0003674,molecular_function; GO:0003824,catalytic activity; GO:0004180,carboxypeptidase activity; GO:0008233,peptidase activity; GO:0008236,serine-type peptidase activity; GO:0008238,exopeptidase activity; GO:0016787,hydrolase activity; GO:0017171,serine hydrolase activity; GO:0070008,seri…	PF00450.25:Serine carboxypeptidase	--	--	--
IFM89_037638	1.5908	2.0858	2.9244	6.792	3.3159	5.3231	65	92	134	325	206	215	1.13523	0.00191666	0.03035	up	CM027378.1	110104389	110108725	+	IFM89_037638	--	K02212 DNA replication licensing factor MCM4 [EC:5.6.2.3] | (RefSeq) DNA replication licensing factor MCM4 (A)	ko03030: DNA replication	hypothetical protein IFM89_037638 [Coptis chinensis]	MCM4_ORYSJ RecName: Full=DNA replication licensing factor MCM4; EC=3.6.4.12; AltName: Full=Minichromosome maintenance protein 4; Short=OsMCM4;	A0A835MB48_9MAGN RecName: Full=DNA replication licensing factor MCM4 {ECO:0000256|RuleBase:RU368062}; EC=3.6.4.12 {ECO:0000256|RuleBase:RU368062};	DNA replication licensing factor, MCM4 component	GO:0000785,chromatin; GO:0042555,MCM complex; GO:0005634,nucleus; GO:0000347,THO complex; GO:0005524,ATP binding; GO:0016887,ATP hydrolysis activity; GO:0003678,DNA helicase activity; GO:0046872,metal ion binding; GO:0003697,single-stranded DNA binding; GO:0006271,DNA strand elongation involved in DNA replication; GO:0006268,DNA unwinding involved in DNA replication; GO:0000727,double-strand brea…	PF00493.26:MCM P-loop domain	--	--	--
IFM89_036384	7.6365	7.2388	10.7685	24.1119	16.4692	16.1693	43	44	68	159	141	90	1.0584	0.00191789	0.03035	up	CM027379.1	103158634	103160418	+	IFM89_036384	--	K00559 sterol 24-C-methyltransferase [EC:2.1.1.41] | (RefSeq) cycloartenol-C-24-methyltransferase (A)	ko00100: Steroid biosynthesis; ko01100: Metabolic pathways; ko01110: Biosynthesis of secondary metabolites	hypothetical protein IFM89_036384 [Coptis chinensis]	SMT1_ORYSJ RecName: Full=Cycloartenol-C-24-methyltransferase 1; EC=2.1.1.41; AltName: Full=24-sterol C-methyltransferase 1; Short=Sterol C-methyltransferase 1;	A0A835M2N6_9MAGN SubName: Full=Uncharacterized protein {ECO:0000313|EMBL:KAF9617423.1};	SAM-dependent methyltransferases	GO:0005783,endoplasmic reticulum; GO:0003838,sterol 24-C-methyltransferase activity; GO:0032259,methylation; GO:0016126,sterol biosynthetic process; GO:0003674,molecular_function; GO:0003824,catalytic activity; GO:0008168,methyltransferase activity; GO:0008169,C-methyltransferase activity; GO:0008757,S-adenosylmethionine-dependent methyltransferase activity; GO:0016740,transferase activity; GO:00…	PF07021.15:Methionine biosynthesis protein MetW	--	--	--
IFM89_028740	2.6022	4.0908	6.9964	14.1403	8.9983	10.0912	66	112	199	420	347	253	1.19126	0.00195278	0.0307854	up	CM027385.1	83476317	83478450	-	IFM89_028740	--	K19996 phosphatidylinositol transfer protein SFH5 | (RefSeq) patellin-4-like (A)	--	hypothetical protein IFM89_028740 [Coptis chinensis]	PATL4_ARATH RecName: Full=Patellin-4;	A0A835GYG4_9MAGN SubName: Full=Uncharacterized protein {ECO:0000313|EMBL:KAF9589805.1};	Phosphatidylinositol transfer protein SEC14 and related proteins	GO:0005829,cytosol; GO:0005634,nucleus; GO:0005886,plasma membrane; GO:0008289,lipid binding; GO:0007049,cell cycle; GO:0051301,cell division; GO:0071365,cellular response to auxin stimulus; GO:1901703,protein localization involved in auxin polar transport; GO:0003674,molecular_function; GO:0005488,binding; GO:0008150,biological_process; GO:0009987,cellular process; GO:0009719,response to endogen…	PF00650.23:CRAL/TRIO domain	--	--	--
IFM89_009659	1.142	2.1159	1.6124	4.1851	7.1042	2.8882	24	48	38	103	227	60	1.46144	0.00196336	0.0308822	up	CM027378.1	76462776	76464589	-	IFM89_009659	--	K03695 ATP-dependent Clp protease ATP-binding subunit ClpB | (RefSeq) chaperone protein ClpB1-like (A)	--	hypothetical protein IFM89_009659 [Coptis chinensis]	ALMTC_ARATH RecName: Full=Aluminum-activated malate transporter 12; Short=AtALMT12; AltName: Full=Quick anion channel 1;	A0A835IPD3_9MAGN SubName: Full=Uncharacterized protein {ECO:0000313|EMBL:KAF9619877.1};	Predicted membrane protein	GO:0012505,endomembrane system; GO:0016021,integral component of membrane; GO:0009705,plant-type vacuole membrane; GO:0005886,plasma membrane; GO:0008509,anion transmembrane transporter activity; GO:0015743,malate transport; GO:0010118,stomatal movement; GO:0008272,sulfate transport; GO:0003674,molecular_function; GO:0005215,transporter activity; GO:0015075,ion transmembrane transporter activity;…	PF11744.11:Aluminium activated malate transporter	--	--	--
IFM89_010161	11.1029	11.314	16.6895	18.8262	27.5406	88.252	70	77	118	139	264	550	1.70146	0.00201149	0.031426	up	CM027379.1	20740422	20741372	-	IFM89_010161	--	K14771 U3 small nucleolar RNA-associated protein 19 | (RefSeq) uncharacterized protein LOC104415905 isoform X1 (A)	--	hypothetical protein IFM89_010161 [Coptis chinensis]	EGC_CITJA RecName: Full=EG45-like domain containing protein; AltName: Full=Blight-associated protein p12; AltName: Full=Plant natriuretic peptide; Short=PNP; Flags: Precursor;	A0A835M4J9_9MAGN RecName: Full=Expansin-like EG45 domain-containing protein {ECO:0000259|PROSITE:PS50842};	--	GO:0048046,apoplast; GO:0009627,systemic acquired resistance; GO:0006950,response to stress; GO:0006952,defense response; GO:0008150,biological_process; GO:0009605,response to external stimulus; GO:0009607,response to biotic stimulus; GO:0043207,response to external biotic stimulus; GO:0044419,biological process involved in interspecies interaction between organisms; GO:0050896,response to stimul…	PF03330.21:Lytic transglycolase	--	--	--
IFM89_023635	47.0745	49.4391	41.5923	19.436	29.827	6.3671	546	619	541	264	526	73	-1.39258	0.00202003	0.0315307	down	CM027381.1	96527033	96528842	+	IFM89_023635	--	K20617 cytochrome P450 family 71 subfamily A | (RefSeq) CYP71AH2; cytochrome P450 71A9-like (A)	--	hypothetical protein IFM89_023635 [Coptis chinensis]	C7113_PRUMU RecName: Full=Cytochrome P450 71AP13 {ECO:0000303|PubMed:25015725}; EC=1.14.-.- {ECO:0000305};	A0A835HUD5_9MAGN SubName: Full=Uncharacterized protein {ECO:0000313|EMBL:KAF9606180.1};	Cytochrome P450 CYP2 subfamily	GO:0016021,integral component of membrane; GO:0020037,heme binding; GO:0005506,iron ion binding; GO:0004497,monooxygenase activity; GO:0016705,oxidoreductase activity, acting on paired donors, with incorporation or reduction of molecular oxygen; GO:0003674,molecular_function; GO:0005488,binding; GO:0046906,tetrapyrrole binding; GO:0097159,organic cyclic compound binding; GO:1901363,heterocyclic c…	PF00067.25:Cytochrome P450	--	--	--
IFM89_008574	1.2879	3.0623	2.182	6.8918	10.0801	3.2572	30	77	57	188	357	75	1.54773	0.00209396	0.0324471	up	CM027380.1	10922107	10923758	-	IFM89_008574	--	K22706 (R)-mandelonitrile beta-glucosyltransferase [EC:2.4.1.354] | (RefSeq) 7-deoxyloganetin glucosyltransferase-like (A)	ko00460: Cyanoamino acid metabolism; ko01100: Metabolic pathways; ko01110: Biosynthesis of secondary metabolites	hypothetical protein IFM89_008574 [Coptis chinensis]	UGT2_GARJA RecName: Full=7-deoxyloganetin glucosyltransferase; EC=2.4.1.324; AltName: Full=Genipin glucosyltransferase; AltName: Full=UDP-glucose glucosyltransferase 2; Short=GjUGT2; AltName: Full=UDP-glycosyltransferase 85A24;	A0A835LYY7_9MAGN RecName: Full=Glycosyltransferase {ECO:0000256|RuleBase:RU362057}; EC=2.4.1.- {ECO:0000256|RuleBase:RU362057};	UDP-glucuronosyl and UDP-glucosyl transferase	GO:0035251,UDP-glucosyltransferase activity; GO:0003674,molecular_function; GO:0003824,catalytic activity; GO:0008194,UDP-glycosyltransferase activity; GO:0016740,transferase activity; GO:0016757,glycosyltransferase activity; GO:0016758,hexosyltransferase activity; GO:0046527,glucosyltransferase activity	PF00201.21:UDP-glucoronosyl and UDP-glucosyl transferase	--	--	--
IFM89_015948	3.4901	6.4663	6.5138	14.9704	7.8473	14.6565	86	172	180	432	294	357	1.09717	0.00210351	0.0325708	up	CM027383.1	77397342	77398877	-	IFM89_015948	--	K21995 cytochrome P450 family 77 subfamily A [EC:1.14.-.-] | (RefSeq) cytochrome P450 77A2-like (A)	ko00073: Cutin, suberine and wax biosynthesis	hypothetical protein IFM89_015948 [Coptis chinensis]	C77A3_SOYBN RecName: Full=Cytochrome P450 77A3; EC=1.14.-.-;	A0A835HD37_9MAGN SubName: Full=Uncharacterized protein {ECO:0000313|EMBL:KAF9597119.1};	Cytochrome P450 CYP2 subfamily	GO:0016020,membrane; GO:0020037,heme binding; GO:0005506,iron ion binding; GO:0016709,oxidoreductase activity, acting on paired donors, with incorporation or reduction of molecular oxygen, NAD(P)H as one donor, and incorporation of one atom of oxygen; GO:0003674,molecular_function; GO:0005488,binding; GO:0046906,tetrapyrrole binding; GO:0097159,organic cyclic compound binding; GO:1901363,heterocy…	PF00067.25:Cytochrome P450	--	--	--
IFM89_030408	0.4657	0.6306	0.8625	1.6978	1.5669	1.2866	26	38	54	111	133	71	1.12954	0.00214455	0.0330819	up	CM027381.1	2234389	2241607	+	IFM89_030408	--	K04681 retinoblastoma-like protein 1 | (RefSeq) retinoblastoma-related protein-like (A)	--	hypothetical protein IFM89_030408 [Coptis chinensis]	RBR_VITVI RecName: Full=Retinoblastoma-related protein;	A0A835HXH7_9MAGN SubName: Full=Uncharacterized protein {ECO:0000313|EMBL:KAF9606989.1};	Rb (Retinoblastoma tumor suppressor)-related protein	GO:0070176,DRM complex; GO:0003677,DNA binding; GO:0008356,asymmetric cell division; GO:0001708,cell fate specification; GO:0009567,double fertilization forming a zygote and endosperm; GO:0009553,embryo sac development; GO:0009960,endosperm development; GO:0000082,G1/S transition of mitotic cell cycle; GO:0022619,generative cell differentiation; GO:0010377,guard cell fate commitment; GO:0007129,h…	PF01858.20:Retinoblastoma-associated protein A domain	RB	TR	RB
novel.7342	0.6725	1.3418	0.4613	3.7989	1.9733	2.9829	13	28	10	86	58	57	1.73278	0.002225	0.033948	up	CM027385.1	984396	993925	-	--	--	K22804 structural maintenance of chromosomes protein 6 | (RefSeq) structural maintenance of chromosomes protein 6B-like (A)	--	hypothetical protein IFM89_016031 [Coptis chinensis]	RNHX1_ARATH RecName: Full=Putative ribonuclease H protein At1g65750; EC=3.1.26.4;	A0A835H393_9MAGN RecName: Full=Reverse transcriptase domain-containing protein {ECO:0000259|PROSITE:PS50878};	FOG: Reverse transcriptase	GO:0046872,metal ion binding; GO:0003676,nucleic acid binding; GO:0004523,RNA-DNA hybrid ribonuclease activity; GO:0003674,molecular_function; GO:0005488,binding; GO:0043167,ion binding; GO:0043169,cation binding; GO:0097159,organic cyclic compound binding; GO:1901363,heterocyclic compound binding; GO:0003824,catalytic activity; GO:0004518,nuclease activity; GO:0004519,endonuclease activity; GO:0…	PF00078.30:Reverse transcriptase (RNA-dependent DNA polymerase)	--	--	--
novel.4374	2.4065	4.9781	3.8751	6.3642	7.084	12.196	103	230	186	319	461	516	1.10239	0.00223003	0.0339998	up	CM027381.1	79122712	79128276	-	--	--	--	--	hypothetical protein IFM89_013012 [Coptis chinensis]	--	A0A835LAT8_9MAGN SubName: Full=Uncharacterized protein {ECO:0000313|EMBL:KAF9588518.1};	--	--	--	--	--	--
IFM89_007923	5.4513	3.6228	3.6986	9.1075	8.3399	11.2693	46	33	35	90	107	94	1.08502	0.00225886	0.034289	up	CM027378.1	111734261	111734930	-	IFM89_007923	--	K03860 phosphatidylinositol N-acetylglucosaminyltransferase subunit Q | (RefSeq) N-acetylglucosaminyl-phosphatidylinositol biosynthetic protein gpi1-like (A)	ko00563: Glycosylphosphatidylinositol (GPI)-anchor biosynthesis; ko01100: Metabolic pathways	hypothetical protein IFM89_007923 [Coptis chinensis]	SNAK1_SOLTU RecName: Full=Snakin-1; Flags: Precursor;	A0A835IN51_9MAGN SubName: Full=Uncharacterized protein {ECO:0000313|EMBL:KAF9619602.1};	--	GO:0005576,extracellular region; GO:0006952,defense response; GO:0006950,response to stress; GO:0008150,biological_process; GO:0050896,response to stimulus; GO:0005575,cellular_component; GO:0110165,cellular anatomical entity	PF02704.17:Gibberellin regulated protein	--	--	--
novel.8969	4.8112	0.7428	1.8817	0	0.1527	0	228	38	100	0	11	0	-5.64073	0.00228832	0.0346102	down	JADFTS010000107.1	73486	92163	+	--	--	K06158 ATP-binding cassette, subfamily F, member 3 | (RefSeq) ABC transporter F family member 3 isoform X1 (A)	--	hypothetical protein AQUCO_01300053v1 [Aquilegia coerulea]	AB3F_ARATH RecName: Full=ABC transporter F family member 3; Short=ABC transporter ABCF.3; Short=AtABCF3; AltName: Full=GCN20-type ATP-binding cassette protein GCN3;	A0A2G5E040_AQUCA RecName: Full=ABC transporter domain-containing protein {ECO:0000259|PROSITE:PS50893};	ATPase component of ABC transporters with duplicated ATPase domains/Translation elongation factor EF-3b	GO:0005634,nucleus; GO:0005524,ATP binding; GO:0042742,defense response to bacterium; GO:0000166,nucleotide binding; GO:0003674,molecular_function; GO:0005488,binding; GO:0017076,purine nucleotide binding; GO:0030554,adenyl nucleotide binding; GO:0032553,ribonucleotide binding; GO:0032555,purine ribonucleotide binding; GO:0032559,adenyl ribonucleotide binding; GO:0035639,purine ribonucleoside tri…	--	--	--	--
IFM89_021795	9.7936	8.3369	10.0312	30.5129	14.7105	17.8068	74	68	85	270	169	133	1.07415	0.00229863	0.034741	up	CM027378.1	107560778	107565385	-	IFM89_021795	--	K11253 histone H3 | (RefSeq) histone H3.2-like (A)	--	hypothetical protein IFM89_021795 [Coptis chinensis]	H31_ARATH RecName: Full=Histone H3.1;	A0A835MF47_9MAGN RecName: Full=Histone domain-containing protein {ECO:0000259|Pfam:PF00125};	Histones H3 and H4	GO:0010369,chromocenter; GO:0005829,cytosol; GO:0005576,extracellular region; GO:0000786,nucleosome; GO:0005634,nucleus; GO:0005886,plasma membrane; GO:0009536,plastid; GO:0003677,DNA binding; GO:0046982,protein heterodimerization activity; GO:0030527,structural constituent of chromatin; GO:0003674,molecular_function; GO:0003676,nucleic acid binding; GO:0005488,binding; GO:0097159,organic cyclic …	PF00125.27:Core histone H2A/H2B/H3/H4	--	--	--
novel.3371	1.5167	2.9786	0.9467	2.8492	6.2843	8.8376	50	106	35	110	315	288	1.64163	0.00231035	0.0348675	up	CM027380.1	40058157	40060239	-	--	--	--	--	--	--	--	--	--	--	--	--	--
IFM89_020122	19.1212	9.6833	8.0706	4.0275	6.0365	5.0293	150	82	71	37	72	39	-1.36559	0.00233131	0.0349438	down	CM027377.1	50035984	50037662	+	IFM89_020122	--	--	--	hypothetical protein IFM89_020122 [Coptis chinensis]	--	A0A835IZM9_9MAGN SubName: Full=Uncharacterized protein {ECO:0000313|EMBL:KAF9625202.1};	--	--	PF11577.11:NF-kappa-B essential modulator NEMO	--	--	--
IFM89_036191	0.561	0.8662	0.6114	2.6614	2.2959	1.1351	18	30	22	100	112	36	1.49635	0.00234027	0.0349854	up	CM027378.1	100435392	100439290	-	IFM89_036191	--	K01188 beta-glucosidase [EC:3.2.1.21] | (RefSeq) beta-glucosidase 31-like (A)	ko00460: Cyanoamino acid metabolism; ko00500: Starch and sucrose metabolism; ko00999: Biosynthesis of various plant secondary metabolites; ko01100: Metabolic pathways; ko01110: Biosynthesis of secondary metabolites	hypothetical protein IFM89_036191 [Coptis chinensis]	BGL31_ORYSJ RecName: Full=Beta-glucosidase 31; Short=Os9bglu31; EC=3.2.1.21; Flags: Precursor;	A0A835ISI4_9MAGN SubName: Full=Uncharacterized protein {ECO:0000313|EMBL:KAF9623055.1};	Beta-glucosidase, lactase phlorizinhydrolase, and related proteins	GO:0033907,beta-D-fucosidase activity; GO:0004565,beta-galactosidase activity; GO:0008422,beta-glucosidase activity; GO:0102483,scopolin beta-glucosidase activity; GO:0005975,carbohydrate metabolic process; GO:0003674,molecular_function; GO:0003824,catalytic activity; GO:0004553,hydrolase activity, hydrolyzing O-glycosyl compounds; GO:0016787,hydrolase activity; GO:0016798,hydrolase activity, act…	PF00232.21:Glycosyl hydrolase family 1	--	--	--
IFM89_017908	12.5929	16.1862	14.0365	5.1077	7.4542	9.2361	80	111	100	38	72	58	-1.06089	0.00236913	0.0351694	down	CM027377.1	9700465	9701074	-	IFM89_017908	--	--	--	hypothetical protein IFM89_017908 [Coptis chinensis]	--	A0A835J0T9_9MAGN SubName: Full=Uncharacterized protein {ECO:0000313|EMBL:KAF9625078.1};	--	--	--	--	--	--
novel.2700	1.8628	0.7469	4.0907	0.3799	0.8229	0.1406	67	29	165	16	45	5	-2.38302	0.00240293	0.0354465	down	CM027379.1	105287980	105291131	+	--	--	--	--	hypothetical protein IFM89_021356 [Coptis chinensis]	--	A0A835IBS7_9MAGN RecName: Full=PK_Tyr_Ser-Thr domain-containing protein {ECO:0000259|Pfam:PF07714};	--	GO:0016020,membrane; GO:0005452,solute:inorganic anion antiporter activity; GO:0004672,protein kinase activity; GO:0006468,protein phosphorylation; GO:0003674,molecular_function; GO:0005215,transporter activity; GO:0008509,anion transmembrane transporter activity; GO:0015075,ion transmembrane transporter activity; GO:0015103,inorganic anion transmembrane transporter activity; GO:0015291,secondary…	PF12854.10:PPR repeat	--	--	--
IFM89_017236	0.5276	1.0151	0.9771	2.9456	2.856	1.6011	13	27	27	85	107	39	1.46962	0.0024047	0.0354465	up	CM027383.1	207319	209497	+	IFM89_017236	--	K24188 cytochrome P450 family 93 subfamily A [EC:1.14.-.-] | (RefSeq) cytochrome P450 93A3-like (A)	--	hypothetical protein IFM89_017236 [Coptis chinensis]	C93A3_SOYBN RecName: Full=Cytochrome P450 93A3; EC=1.14.-.-; AltName: Full=Cytochrome P450 CP5;	A0A835HFT7_9MAGN SubName: Full=Uncharacterized protein {ECO:0000313|EMBL:KAF9597333.1};	Cytochrome P450 CYP2 subfamily	GO:0016021,integral component of membrane; GO:0016020,membrane; GO:0020037,heme binding; GO:0005506,iron ion binding; GO:0016709,oxidoreductase activity, acting on paired donors, with incorporation or reduction of molecular oxygen, NAD(P)H as one donor, and incorporation of one atom of oxygen; GO:0003674,molecular_function; GO:0005488,binding; GO:0046906,tetrapyrrole binding; GO:0097159,organic c…	PF00067.25:Cytochrome P450	--	--	--
IFM89_036408	17.9124	15.7639	32.5841	50.169	63.3818	35.879	100	95	204	328	538	198	1.09048	0.00240908	0.0354846	up	CM027379.1	103418288	103418937	-	IFM89_036408	--	K01858 myo-inositol-1-phosphate synthase [EC:5.5.1.4] | (RefSeq) inositol-3-phosphate synthase (A)	ko00562: Inositol phosphate metabolism; ko01100: Metabolic pathways; ko01110: Biosynthesis of secondary metabolites	hypothetical protein IFM89_036408, partial [Coptis chinensis]	INO1_SPIPO RecName: Full=Inositol-3-phosphate synthase; Short=MIP synthase; EC=5.5.1.4; AltName: Full=Myo-inositol 1-phosphate synthase; Short=IPS; Short=MI-1-P synthase;	A0A835IJC2_9MAGN RecName: Full=Inositol-3-phosphate synthase {ECO:0000256|ARBA:ARBA00012125}; EC=5.5.1.4 {ECO:0000256|ARBA:ARBA00012125};	Myo-inositol-1-phosphate synthase	GO:0005737,cytoplasm; GO:0004512,inositol-3-phosphate synthase activity; GO:0006021,inositol biosynthetic process; GO:0008654,phospholipid biosynthetic process; GO:0003674,molecular_function; GO:0003824,catalytic activity; GO:0016853,isomerase activity; GO:0016872,intramolecular lyase activity; GO:0005975,carbohydrate metabolic process; GO:0006020,inositol metabolic process; GO:0006066,alcohol me…	PF01658.20:Myo-inositol-1-phosphate synthase	--	--	--
IFM89_009836	1.0029	0.929	1.2296	2.7832	2.3292	1.9023	32	32	44	104	113	60	1.06566	0.00243232	0.035726	up	CM027380.1	671812	677562	-	IFM89_009836	--	K05681 ATP-binding cassette, subfamily G (WHITE), member 2 | (RefSeq) ABC transporter G family member 25 (A)	ko02010: ABC transporters	hypothetical protein IFM89_009836 [Coptis chinensis]	AB25G_ARATH RecName: Full=ABC transporter G family member 25 {ECO:0000303|PubMed:18299247}; Short=ABC transporter ABCG.25 {ECO:0000303|PubMed:18299247}; Short=AtABCG25 {ECO:0000303|PubMed:18299247}; AltName: Full=White-brown complex homolog protein 26 {ECO:0000303|PubMed:11346655}; Short=AtWBC26 {ECO:0000303|PubMed:11346655};	A0A835LUZ3_9MAGN RecName: Full=ABC transporter domain-containing protein {ECO:0000259|PROSITE:PS50893};	Transporter, ABC superfamily (Breast cancer resistance protein)	GO:0016021,integral component of membrane; GO:0016020,membrane; GO:0005886,plasma membrane; GO:0140359,ABC-type transporter activity; GO:0005524,ATP binding; GO:0042626,ATPase-coupled transmembrane transporter activity; GO:0015562,efflux transmembrane transporter activity; GO:0080168,abscisic acid transport; GO:0009738,abscisic acid-activated signaling pathway; GO:0140352,export from cell; GO:001…	PF01061.27:ABC-2 type transporter	--	--	--
IFM89_026940	4.8304	6.3215	3.692	1.1785	0.6556	2.7148	63	89	54	18	13	35	-1.81091	0.00244641	0.0357982	down	CM027380.1	98212173	98213949	-	IFM89_026940	--	K09499 T-complex protein 1 subunit eta | (RefSeq) T-complex protein 1 subunit eta-like (A)	--	hypothetical protein IFM89_010087 [Coptis chinensis]	TCPH_ARATH RecName: Full=T-complex protein 1 subunit eta {ECO:0000303|PubMed:11599560}; Short=TCP-1-eta {ECO:0000303|PubMed:11599560}; AltName: Full=CCT-eta {ECO:0000303|PubMed:11599560}; AltName: Full=Chaperonin CCT7 {ECO:0000303|PubMed:21868675};	A0A835LXG4_9MAGN SubName: Full=Uncharacterized protein {ECO:0000313|EMBL:KAF9608602.1};	Chaperonin complex component, TCP-1 eta subunit (CCT7)	GO:0005832,chaperonin-containing T-complex; GO:0005829,cytosol; GO:0005524,ATP binding; GO:0016887,ATP hydrolysis activity; GO:0140662,ATP-dependent protein folding chaperone; GO:0051082,unfolded protein binding; GO:0006457,protein folding; GO:0000166,nucleotide binding; GO:0003674,molecular_function; GO:0005488,binding; GO:0017076,purine nucleotide binding; GO:0030554,adenyl nucleotide binding; …	PF00118.27:TCP-1/cpn60 chaperonin family	--	--	--
IFM89_015168	2.0352	2.4115	3.5031	6.5878	6.008	4.5009	43	55	83	163	193	94	1.01938	0.0024896	0.0361352	up	CM027385.1	81582981	81584297	-	IFM89_015168	--	K17361 acyl-coenzyme A thioesterase 9 [EC:3.1.2.-] | (RefSeq) acyl-coenzyme A thioesterase 9, mitochondrial-like (A)	--	hypothetical protein IFM89_015168 [Coptis chinensis]	TE2_HUMLU RecName: Full=Acyl-coenzyme A thioesterase 2, chloroplastic {ECO:0000303|PubMed:23300257}; Short=Acyl-CoA thioesterase 2 {ECO:0000303|PubMed:23300257}; Short=HlTE2 {ECO:0000303|PubMed:23300257}; EC=3.1.2.- {ECO:0000250|UniProtKB:Q32MW3}; AltName: Full=Acyl-CoA thioester hydrolase 2 {ECO:0000303|PubMed:23300257}; Flags: Precursor;	A0A835LIN1_9MAGN SubName: Full=Uncharacterized protein {ECO:0000313|EMBL:KAF9588731.1};	Acyl-CoA thioesterase	GO:0009507,chloroplast; GO:0016787,hydrolase activity; GO:0003674,molecular_function; GO:0003824,catalytic activity; GO:0005575,cellular_component; GO:0005622,intracellular anatomical structure; GO:0005737,cytoplasm; GO:0009536,plastid; GO:0043226,organelle; GO:0043227,membrane-bounded organelle; GO:0043229,intracellular organelle; GO:0043231,intracellular membrane-bounded organelle; GO:0110165,c…	PF03061.25:Thioesterase superfamily	--	--	--
IFM89_012651	1.3953	3.3073	5.6719	12.7201	7.4493	9.7558	34	87	155	363	276	235	1.43944	0.00252376	0.0365289	up	CM027380.1	13909415	13911763	-	IFM89_012651	--	K00850 6-phosphofructokinase 1 [EC:2.7.1.11] | (RefSeq) ATP-dependent 6-phosphofructokinase 6-like (A)	ko00010: Glycolysis / Gluconeogenesis; ko00030: Pentose phosphate pathway; ko00051: Fructose and mannose metabolism; ko00052: Galactose metabolism; ko01100: Metabolic pathways; ko01110: Biosynthesis of secondary metabolites; ko01200: Carbon metabolism; ko01230: Biosynthesis of amino acids; ko03018: RNA degradation	hypothetical protein IFM89_012651 [Coptis chinensis]	PUP1_ARATH RecName: Full=Purine permease 1 {ECO:0000303|PubMed:10662864}; Short=AtPUP1 {ECO:0000303|PubMed:10662864};	A0A835M383_9MAGN RecName: Full=Probable purine permease {ECO:0000256|RuleBase:RU368015};	--	GO:0005887,integral component of plasma membrane; GO:0005345,purine nucleobase transmembrane transporter activity; GO:0015211,purine nucleoside transmembrane transporter activity; GO:0010184,cytokinin transport; GO:0006863,purine nucleobase transport; GO:0003674,molecular_function; GO:0005215,transporter activity; GO:0015205,nucleobase transmembrane transporter activity; GO:0022857,transmembrane …	PF16913.8:Purine nucleobase transmembrane transport	--	--	--
IFM89_016358	0.7507	1.1425	1.3866	2.7244	2.3453	2.1969	28	46	58	119	133	81	1.0594	0.00262385	0.0374833	up	CM027383.1	548923	551247	+	IFM89_016358	--	K01613 phosphatidylserine decarboxylase [EC:4.1.1.65] | (RefSeq) phosphatidylserine decarboxylase proenzyme 3-like (A)	ko00564: Glycerophospholipid metabolism; ko01100: Metabolic pathways; ko01110: Biosynthesis of secondary metabolites	hypothetical protein IFM89_016358 [Coptis chinensis]	FTIP3_ARATH RecName: Full=FT-interacting protein 3 {ECO:0000303|PubMed:29742441}; AltName: Full=Multiple C2 domain and transmembrane region protein 3 {ECO:0000303|PubMed:29259105};	A0A835LLT2_9MAGN SubName: Full=Uncharacterized protein {ECO:0000313|EMBL:KAF9597217.1};	--	GO:0005737,cytoplasm; GO:0005829,cytosol; GO:0005783,endoplasmic reticulum; GO:0005789,endoplasmic reticulum membrane; GO:0005768,endosome; GO:0010008,endosome membrane; GO:0000139,Golgi membrane; GO:0016021,integral component of membrane; GO:0009505,plant-type cell wall; GO:0005886,plasma membrane; GO:0009506,plasmodesma; GO:0016757,glycosyltransferase activity; GO:0046872,metal ion binding; GO:…	PF08372.13:Plant phosphoribosyltransferase C-terminal	--	--	--
IFM89_007626	4.2891	3.3773	4.2708	7.0198	7.0994	11.2814	60	51	67	115	151	156	1.0026	0.00265447	0.0377295	up	CM027381.1	6071388	6075431	-	IFM89_007626	--	K21776 protein lin-54 | (RefSeq) Lin-54-like protein (A)	--	hypothetical protein IFM89_007626 [Coptis chinensis]	ACP1_CASGL RecName: Full=Acyl carrier protein 1, chloroplastic; Short=ACP 1; Flags: Precursor;	A0A835HP99_9MAGN RecName: Full=Acyl carrier protein {ECO:0000256|RuleBase:RU000722};	Acyl carrier protein/NADH-ubiquinone oxidoreductase, NDUFAB1/SDAP subunit	GO:0009507,chloroplast; GO:0000036,acyl carrier activity; GO:0031177,phosphopantetheine binding; GO:0003674,molecular_function; GO:0005488,binding; GO:0044620,ACP phosphopantetheine attachment site binding; GO:0051192,prosthetic group binding; GO:0140104,molecular carrier activity; GO:0140414,phosphopantetheine-dependent carrier activity; GO:0019842,vitamin binding; GO:0033218,amide binding; GO:0…	PF00550.28:Phosphopantetheine attachment site	--	--	--
IFM89_009765	16.5098	6.0295	14.9578	23.8126	29.0605	30.0847	312	123	317	527	835	562	1.0641	0.0026598	0.0377384	up	CM027380.1	1285449	1288752	-	IFM89_009765	--	K03542 photosystem II 22kDa protein | (RefSeq) photosystem II 22 kDa protein, chloroplastic-like (A)	ko00195: Photosynthesis; ko01100: Metabolic pathways	hypothetical protein IFM89_009765 [Coptis chinensis]	PSBS_SOLSG RecName: Full=Photosystem II 22 kDa protein, chloroplastic; AltName: Full=CP22; Flags: Precursor;	A0A835I0G4_9MAGN SubName: Full=Uncharacterized protein {ECO:0000313|EMBL:KAF9608399.1};	--	GO:0009535,chloroplast thylakoid membrane; GO:0016021,integral component of membrane; GO:0009523,photosystem II; GO:0015979,photosynthesis; GO:0008150,biological_process; GO:0008152,metabolic process; GO:0009987,cellular process; GO:0044237,cellular metabolic process; GO:0005575,cellular_component; GO:0005622,intracellular anatomical structure; GO:0005737,cytoplasm; GO:0009507,chloroplast; GO:000…	PF00504.24:Chlorophyll A-B binding protein	--	--	--
IFM89_027201	0.8683	3.1328	5.1346	4.4877	13.4355	19.7872	19	74	126	115	447	428	1.96376	0.0026796	0.0379333	up	CM027380.1	13387705	13395739	-	IFM89_027201	--	K04646 clathrin heavy chain | (RefSeq) clathrin heavy chain 1 (A)	ko04144: Endocytosis	hypothetical protein IFM89_027201 [Coptis chinensis]	CLAH2_ARATH RecName: Full=Clathrin heavy chain 2;	A0A835I4K8_9MAGN SubName: Full=Uncharacterized protein {ECO:0000313|EMBL:KAF9611146.1};	Vesicle coat protein clathrin, heavy chain	GO:0009507,chloroplast; GO:0030132,clathrin coat of coated pit; GO:0030130,clathrin coat of trans-Golgi network vesicle; GO:0071439,clathrin complex; GO:0005794,Golgi apparatus; GO:0005886,plasma membrane; GO:0009506,plasmodesma; GO:0032051,clathrin light chain binding; GO:0042802,identical protein binding; GO:0003729,mRNA binding; GO:0005198,structural molecule activity; GO:0006897,endocytosis; …	PF01394.23:Clathrin propeller repeat	--	--	--
IFM89_021432	7.9661	15.7432	6.7483	4.4782	4.5844	5.3054	120	256	114	79	105	79	-1.17007	0.00272288	0.0384243	down	CM027380.1	2204080	2208157	-	IFM89_021432	--	--	--	hypothetical protein IFM89_021432 [Coptis chinensis]	RLP20_ARATH RecName: Full=Receptor-like protein 20 {ECO:0000303|PubMed:18434605}; Short=AtRLP20 {ECO:0000303|PubMed:18434605}; Flags: Precursor;	A0A835M0Y9_9MAGN SubName: Full=Uncharacterized protein {ECO:0000313|EMBL:KAF9610239.1};	--	GO:0016021,integral component of membrane; GO:0005886,plasma membrane; GO:0005575,cellular_component; GO:0016020,membrane; GO:0031224,intrinsic component of membrane; GO:0110165,cellular anatomical entity; GO:0071944,cell periphery	PF13855.9:Leucine rich repeat	--	--	--
IFM89_019482	4.5208	6.443	13.2178	28.3215	12.9512	21.152	104	160	341	763	453	481	1.28013	0.00273192	0.0384964	up	CM027385.1	78772357	78773790	-	IFM89_019482	--	--	--	hypothetical protein IFM89_019482 [Coptis chinensis]	RLP29_ARATH RecName: Full=Receptor like protein 29 {ECO:0000303|PubMed:18434605}; Short=AtRLP29 {ECO:0000303|PubMed:18434605}; Flags: Precursor;	A0A835LJ21_9MAGN SubName: Full=Uncharacterized protein {ECO:0000313|EMBL:KAF9589166.1};	FOG: Leucine rich repeat	GO:0031225,anchored component of membrane; GO:0016021,integral component of membrane; GO:0005886,plasma membrane; GO:0005575,cellular_component; GO:0016020,membrane; GO:0031224,intrinsic component of membrane; GO:0110165,cellular anatomical entity; GO:0071944,cell periphery	PF13855.9:Leucine rich repeat	--	--	--
IFM89_039755	0.9552	4.7636	1.6335	0.7039	0.895	0.8339	73	393	140	63	104	63	-1.68025	0.00273746	0.0384964	down	JADFTS010000056.1	442305	455754	+	IFM89_039755	--	K11422 [histone H3]-lysine4 N-trimethyltransferase SETD1 [EC:2.1.1.354] | (RefSeq) histone-lysine N-methyltransferase, H3 lysine-4 specific-like (A)	ko00310: Lysine degradation; ko01100: Metabolic pathways	hypothetical protein IFM89_039755 [Coptis chinensis]	PP279_ARATH RecName: Full=Pentatricopeptide repeat-containing protein At3g53170;	A0A835GTL5_9MAGN SubName: Full=Uncharacterized protein {ECO:0000313|EMBL:KAF9587069.1};	FOG: PPR repeat	--	PF13831.9:PHD-finger	SET	TR	SET
[truncated: 53 more rows]
